# Supplementary material for: Genomic Trajectories to Desiccation Resistance: Convergence and Divergence Among Replicate Selected Drosophila Lines
Source: Oxford University Press journal article supplement (doi:10.1534/genetics.116.187104), 2016-12-23
Supplement: figures18.pdf [file figures18.pdf]

Gene overlap caused by single-mapping SNPs

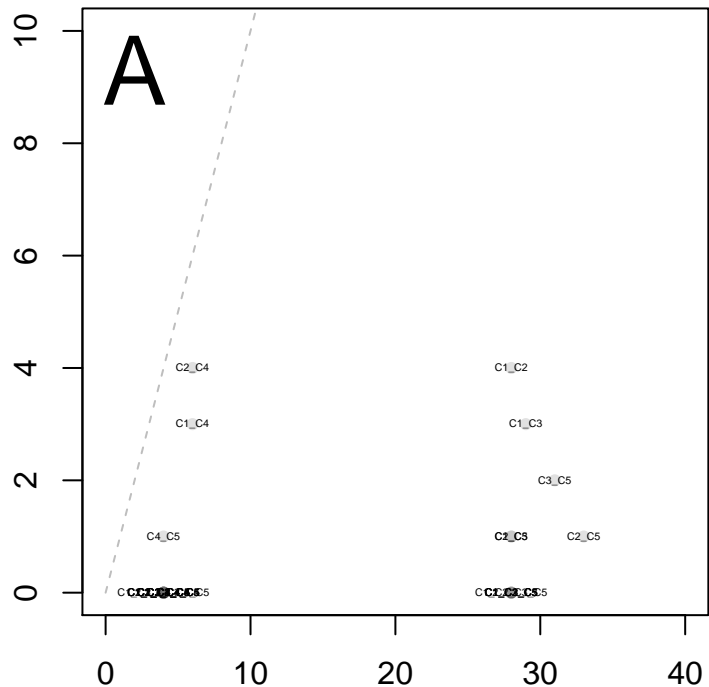

Gene overlap caused by multi-mapping SNPs

log<sub>10</sub>(gene overlap caused by single-mapping SNPs)

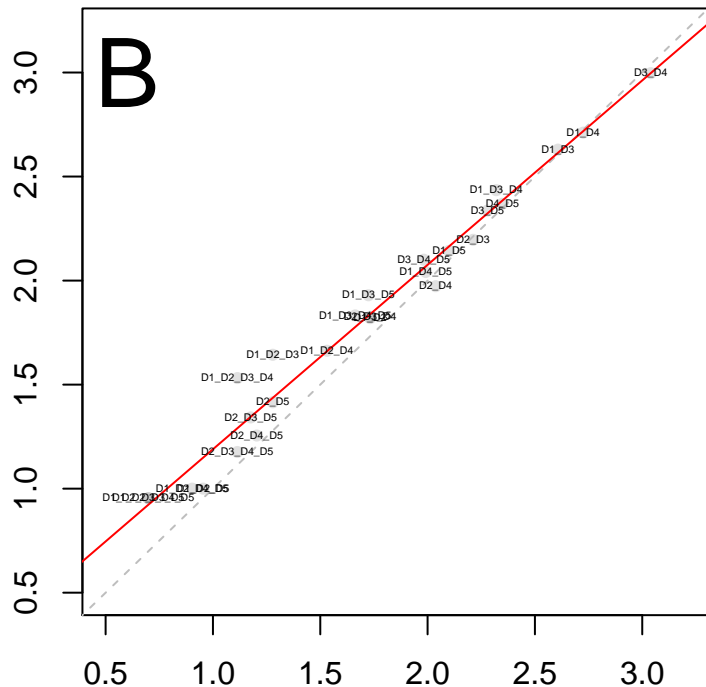

log<sub>10</sub>(gene overlap caused by multi-mapping SNPs)
