# Supplementary material for: Genomic Trajectories to Desiccation Resistance: Convergence and Divergence Among Replicate Selected Drosophila Lines
Source: Oxford University Press journal article supplement (doi:10.1534/genetics.116.187104), 2016-12-23
Supplement: files2.xlsx [file files2.xlsx]

## Sheet: MB_C1.13 SNPEff candidate SNPs
##SnpEffVersion="4.0e (build 2014-09-13), by Pablo Cingolani"
##SnpEffCmd="SnpEff dm6.01 /Users/pgriffin/Documents/Drosophila Selection Experiment/snp_and_gene_lists/C1_fet_drift_sig_SNPs_150821.vcf "
##INFO=<ID=EFF,Number=.,Type=String,Description="Predicted effects for this variant.Format: 'Effect ( Effect_Impact | Functional_Class | Codon_Change | Amino_Acid_Change| Amino_Acid_length | Gene_Name | Transcript_BioType | Gene_Coding | Transcript_ID | Exon_Rank | Genotype_Number [ | ERRORS | WARNINGS ] )' ">
##INFO=<ID=LOF,Number=.,Type=String,Description="Predicted loss of function effects for this variant. Format: 'Gene_Name | Gene_ID | Number_of_transcripts_in_gene | Percent_of_transcripts_affected' ">
##INFO=<ID=NMD,Number=.,Type=String,Description="Predicted nonsense mediated decay effects for this variant. Format: 'Gene_Name | Gene_ID | Number_of_transcripts_in_gene | Percent_of_transcripts_affected' ">
#CHROM	POS	ID	REF	ALT	QUAL	FILTER	INFO
2L	859625	.	A	C	30	PASS	EFF=upstream_gene_variant(MODIFIER||684||316|CG13950|protein_coding|CODING|FBtr0078018||1),intergenic_region(MODIFIER||||||||||1)
2L	879398	.	G	T	30	PASS	EFF=synonymous_variant(LOW||atA/atA|p.Ile1626Ile/c.4878C>A|1957|CG15824|protein_coding|CODING|FBtr0345634|13|1|WARNING_REF_DOES_NOT_MATCH_GENOME),synonymous_variant(LOW||atA/atA|p.Ile1626Ile/c.4878C>A|1957|CG15824|protein_coding|CODING|FBtr0332181|13|1|WARNING_REF_DOES_NOT_MATCH_GENOME)
2L	1603724	.	T	A	30	PASS	EFF=intron_variant(MODIFIER|||c.1490+5762A>T|916|CG31935|protein_coding|CODING|FBtr0077916|2|1),intron_variant(MODIFIER|||c.2165+95T>A|981|haf|protein_coding|CODING|FBtr0310017|6|1),intron_variant(MODIFIER|||c.2165+95T>A|982|haf|protein_coding|CODING|FBtr0310018|6|1),intron_variant(MODIFIER|||c.2165+95T>A|981|haf|protein_coding|CODING|FBtr0310019|6|1),intron_variant(MODIFIER|||c.2165+95T>A|982|ha…
2L	2732852	.	T	G	30	PASS	EFF=intron_variant(MODIFIER|||c.119-4180T>G|624|CG31689|protein_coding|CODING|FBtr0334161|2|1),intron_variant(MODIFIER|||c.-167+2480T>G|615|CG31689|protein_coding|CODING|FBtr0077705|1|1),intron_variant(MODIFIER|||c.-30+2480T>G|615|CG31689|protein_coding|CODING|FBtr0334159|1|1),intron_variant(MODIFIER|||c.-211+2383T>G|615|CG31689|protein_coding|CODING|FBtr0077706|1|1),intron_variant(MODIFIER|||c.-…
2L	3593814	.	C	T	30	PASS	EFF=intergenic_region(MODIFIER||||||||||1)
2L	3794906	.	C	T	30	PASS	EFF=synonymous_variant(LOW||aaT/aaT|p.Asn912Asn/c.2736C>T|3115|CG3921|protein_coding|CODING|FBtr0077496|4|1|WARNING_REF_DOES_NOT_MATCH_GENOME),synonymous_variant(LOW||aaT/aaT|p.Asn912Asn/c.2736C>T|3123|CG3921|protein_coding|CODING|FBtr0307051|4|1|WARNING_REF_DOES_NOT_MATCH_GENOME),synonymous_variant(LOW||aaT/aaT|p.Asn912Asn/c.2736C>T|3123|CG3921|protein_coding|CODING|FBtr0307052|4|1|WARNING_REF_D…
2L	3831789	.	G	T	30	PASS	EFF=intergenic_region(MODIFIER||||||||||1)
2L	4392551	.	G	A	30	PASS	EFF=synonymous_variant(LOW|SILENT|ctG/ctA|p.Leu765Leu/c.2295G>A|809|Tps1|protein_coding|CODING|FBtr0077431|5|1),downstream_gene_variant(MODIFIER||219||224|CG3652|protein_coding|CODING|FBtr0077460||1)
2L	4491229	.	T	A	30	PASS	EFF=synonymous_variant(LOW||gtT/gtT|p.Val19591Val/c.58773A>T|22949|dp|protein_coding|CODING|FBtr0332345|72|1|WARNING_REF_DOES_NOT_MATCH_GENOME),synonymous_variant(LOW||gtT/gtT|p.Val19472Val/c.58416A>T|22830|dp|protein_coding|CODING|FBtr0332346|71|1|WARNING_REF_DOES_NOT_MATCH_GENOME),synonymous_variant(LOW||gtT/gtT|p.Val15283Val/c.45849A>T|18641|dp|protein_coding|CODING|FBtr0332347|68|1|WARNING_RE…
2L	4491596	.	G	A	30	PASS	EFF=synonymous_variant(LOW||tTg/tTg|p.Leu19469Leu/c.58406C>T|22949|dp|protein_coding|CODING|FBtr0332345|72|1|WARNING_REF_DOES_NOT_MATCH_GENOME),synonymous_variant(LOW||tTg/tTg|p.Leu19350Leu/c.58049C>T|22830|dp|protein_coding|CODING|FBtr0332346|71|1|WARNING_REF_DOES_NOT_MATCH_GENOME),synonymous_variant(LOW||tTg/tTg|p.Leu15161Leu/c.45482C>T|18641|dp|protein_coding|CODING|FBtr0332347|68|1|WARNING_RE…
2L	5210464	.	C	T	30	PASS	EFF=5_prime_UTR_variant(MODIFIER||38|c.-38C>T|502|Cyp28d1|protein_coding|CODING|FBtr0079062|1|1)
2L	5538405	.	C	T	30	PASS	EFF=synonymous_variant(LOW|SILENT|gcG/gcA|p.Ala211Ala/c.633G>A|483|CG14015|protein_coding|CODING|FBtr0079126|2|1),downstream_gene_variant(MODIFIER||921||424|Hel25E|protein_coding|CODING|FBtr0079123||1),downstream_gene_variant(MODIFIER||921||424|Hel25E|protein_coding|CODING|FBtr0079125||1)
2L	6066469	.	G	T	30	PASS	EFF=missense_variant(MODERATE|MISSENSE|Gcg/Tcg|p.Ala46Ser/c.136G>T|391|CG9147|protein_coding|CODING|FBtr0343124|3|1),missense_variant(MODERATE|MISSENSE|Gcg/Tcg|p.Ala46Ser/c.136G>T|391|CG9147|protein_coding|CODING|FBtr0343123|3|1),missense_variant(MODERATE|MISSENSE|Gcg/Tcg|p.Ala46Ser/c.136G>T|391|CG9147|protein_coding|CODING|FBtr0079189|3|1),missense_variant(MODERATE|MISSENSE|Gcg/Tcg|p.Ala46Ser/c.…
2L	6087356	.	T	C	30	PASS	EFF=intergenic_region(MODIFIER||||||||||1)
2L	6751044	.	G	T	30	PASS	EFF=intron_variant(MODIFIER|||c.14-2896G>T|456|CG11221|protein_coding|CODING|FBtr0079303|1|1),intron_variant(MODIFIER|||c.14-2896G>T|456|CG11221|protein_coding|CODING|FBtr0339237|1|1)
2L	7047235	.	G	A	30	PASS	EFF=intron_variant(MODIFIER|||c.386-4132G>A|1116|milt|protein_coding|CODING|FBtr0306228|3|1),intron_variant(MODIFIER|||c.386-4132G>A|1116|milt|protein_coding|CODING|FBtr0306229|3|1),intron_variant(MODIFIER|||c.805+21G>A|1256|milt|protein_coding|CODING|FBtr0306231|2|1),intron_variant(MODIFIER|||c.805+21G>A|1256|milt|protein_coding|CODING|FBtr0306233|2|1)
2L	8378664	.	C	T	30	PASS	EFF=missense_variant(MODERATE|MISSENSE|Gac/Aac|p.Asp886Asn/c.2656G>A|966|Aats-ala|protein_coding|CODING|FBtr0079722|2|1),missense_variant(MODERATE|MISSENSE|Gac/Aac|p.Asp886Asn/c.2656G>A|966|Aats-ala|protein_coding|CODING|FBtr0079721|3|1),downstream_gene_variant(MODIFIER||458||255|CG17294|protein_coding|CODING|FBtr0079651||1)
2L	8878986	.	A	T	30	PASS	EFF=intergenic_region(MODIFIER||||||||||1)
2L	10103614	.	G	A	30	PASS	EFF=intron_variant(MODIFIER|||c.1141-5604C>T|1946|CG44153|protein_coding|CODING|FBtr0335509|6|1),intron_variant(MODIFIER|||c.1141-5604C>T|1946|CG44153|protein_coding|CODING|FBtr0335510|6|1),intron_variant(MODIFIER|||c.65-32G>A|800|CG34109|protein_coding|CODING|FBtr0300423|2|1)
2L	10260148	.	A	G	30	PASS	EFF=upstream_gene_variant(MODIFIER||161||514|Pten|protein_coding|CODING|FBtr0089900||1),upstream_gene_variant(MODIFIER||161||509|Pten|protein_coding|CODING|FBtr0089901||1),upstream_gene_variant(MODIFIER||161||418|Pten|protein_coding|CODING|FBtr0089902||1),intron_variant(MODIFIER|||c.-116+106T>C|514|Pten|protein_coding|CODING|FBtr0089904|2|1),intron_variant(MODIFIER|||c.-116+106T>C|509|Pten|protei…
2L	10701352	.	A	G	30	PASS	EFF=synonymous_variant(LOW||agC/agC|p.Ser4Ser/c.12T>C|439|Lip1|protein_coding|CODING|FBtr0340248|1|1|WARNING_REF_DOES_NOT_MATCH_GENOME),synonymous_variant(LOW||agC/agC|p.Ser4Ser/c.12T>C|439|Lip1|protein_coding|CODING|FBtr0080124|1|1|WARNING_REF_DOES_NOT_MATCH_GENOME),downstream_gene_variant(MODIFIER||588||377|Lip2|protein_coding|CODING|FBtr0340247||1),downstream_gene_variant(MODIFIER||883||413|Li…
2L	10792149	.	G	C	30	PASS	EFF=downstream_gene_variant(MODIFIER||699||79|CG31870|protein_coding|CODING|FBtr0342583||1),intron_variant(MODIFIER|||c.-7-3172C>G|777|CG31869|protein_coding|CODING|FBtr0080189|1|1),intron_variant(MODIFIER|||c.-623-3172C>G|602|CG31869|protein_coding|CODING|FBtr0290245|1|1),intron_variant(MODIFIER|||c.-7-3172C>G|777|CG31869|protein_coding|CODING|FBtr0290246|2|1)
2L	10819584	.	T	C	30	PASS	EFF=synonymous_variant(LOW|SILENT|gaT/gaC|p.Asp154Asp/c.462T>C|423|CG6508|protein_coding|CODING|FBtr0080139|1|1),intron_variant(MODIFIER|||c.1389-1018A>G|1349|Nos|protein_coding|CODING|FBtr0080188|8|1),intron_variant(MODIFIER|||c.1389-1018A>G|756|Nos|protein_coding|CODING|FBtr0100489|8|1),intron_variant(MODIFIER|||c.636-1018A>G|1098|Nos|protein_coding|CODING|FBtr0343888|6|1)
2L	11234093	.	C	A	30	PASS	EFF=upstream_gene_variant(MODIFIER||742|||snoRNA:Me18S-G642||NON_CODING|FBtr0114311||1),upstream_gene_variant(MODIFIER||758||894|ab|protein_coding|CODING|FBtr0332562||1),intron_variant(MODIFIER|||c.-322-1182C>A|894|ab|protein_coding|CODING|FBtr0332557|3|1),intron_variant(MODIFIER|||c.-322-1182C>A|904|ab|protein_coding|CODING|FBtr0332558|3|1),intron_variant(MODIFIER|||c.-322-1182C>A|894|ab|protein…
2L	11497000	.	G	A	30	PASS	EFF=synonymous_variant(LOW|SILENT|ccC/ccT|p.Pro538Pro/c.1614C>T|570|CG6488|protein_coding|CODING|FBtr0080248|5|1)
2L	11498378	.	C	A	30	PASS	EFF=synonymous_variant(LOW|SILENT|ctG/ctT|p.Leu145Leu/c.435G>T|570|CG6488|protein_coding|CODING|FBtr0080248|2|1)
2L	11498399	.	C	T	30	PASS	EFF=synonymous_variant(LOW|SILENT|caG/caA|p.Gln138Gln/c.414G>A|570|CG6488|protein_coding|CODING|FBtr0080248|2|1)
2L	11679486	.	A	T	30	PASS	EFF=intergenic_region(MODIFIER||||||||||1)
2L	11926536	.	G	A	30	PASS	EFF=intron_variant(MODIFIER|||c.-754-821C>T|834|Pde1c|protein_coding|CODING|FBtr0334136|1|1),intron_variant(MODIFIER|||c.-767-808C>T|834|Pde1c|protein_coding|CODING|FBtr0334140|1|1)
2L	11945519	.	C	T	30	PASS	EFF=synonymous_variant(LOW||gcT/gcT|p.Ala181Ala/c.543C>T|477|Cry|protein_coding|CODING|FBtr0080281|2|1|WARNING_REF_DOES_NOT_MATCH_GENOME),synonymous_variant(LOW||gcT/gcT|p.Ala181Ala/c.543C>T|477|Cry|protein_coding|CODING|FBtr0342578|2|1|WARNING_REF_DOES_NOT_MATCH_GENOME)
2L	12003626	.	C	A	30	PASS	EFF=intergenic_region(MODIFIER||||||||||1)
2L	12024610	.	C	G	30	PASS	EFF=non_coding_exon_variant(MODIFIER|||n.519G>C||CR44587||NON_CODING|FBtr0342597|2|1|WARNING_REF_DOES_NOT_MATCH_GENOME)
2L	12488880	.	A	T	30	PASS	EFF=intron_variant(MODIFIER|||c.2775-28120T>A|1137|bun|protein_coding|CODING|FBtr0346622|4|1),intron_variant(MODIFIER|||c.161+2809T>A|226|bun|protein_coding|CODING|FBtr0299652|1|1),intron_variant(MODIFIER|||c.161+2809T>A|226|bun|protein_coding|CODING|FBtr0300524|2|1),intron_variant(MODIFIER|||c.245+9645T>A|254|bun|protein_coding|CODING|FBtr0300522|2|1),intron_variant(MODIFIER|||c.60-11714T>A|192|…
2L	12605554	.	T	A	30	PASS	EFF=intron_variant(MODIFIER|||c.674-8122T>A|961|nub|protein_coding|CODING|FBtr0112642|2|1)
2L	13729529	.	A	T	30	PASS	EFF=intergenic_region(MODIFIER||||||||||1)
2L	13729601	.	T	C	30	PASS	EFF=intergenic_region(MODIFIER||||||||||1)
2L	13746571	.	A	T	30	PASS	EFF=upstream_gene_variant(MODIFIER||381||630|TM9SF4|protein_coding|CODING|FBtr0343657||1),upstream_gene_variant(MODIFIER||381|||CR44846||NON_CODING|FBtr0343658||1),upstream_gene_variant(MODIFIER||381|||CR44846||NON_CODING|FBtr0343659||1),intergenic_region(MODIFIER||||||||||1)
2L	14069400	.	G	A	30	PASS	EFF=intron_variant(MODIFIER|||c.1056+394G>A|808|nAChRalpha5|protein_coding|CODING|FBtr0080594|5|1),intron_variant(MODIFIER|||c.1056+394G>A|808|nAChRalpha5|protein_coding|CODING|FBtr0300594|5|1),intron_variant(MODIFIER|||c.1056+394G>A|808|nAChRalpha5|protein_coding|CODING|FBtr0309867|5|1)
2L	14293507	.	A	T	30	PASS	EFF=intron_variant(MODIFIER|||c.3445+4549A>T|3375|wb|protein_coding|CODING|FBtr0302731|4|1),intron_variant(MODIFIER|||c.3445+4549A>T|3001|wb|protein_coding|CODING|FBtr0305063|4|1),non_coding_exon_variant(MODIFIER|||n.1628T>A||CR43640||NON_CODING|FBtr0310013|2|1|WARNING_REF_DOES_NOT_MATCH_GENOME)
2L	14295739	.	G	T	30	PASS	EFF=upstream_gene_variant(MODIFIER||345|||CR43640||NON_CODING|FBtr0310013||1),intron_variant(MODIFIER|||c.3445+6781G>T|3375|wb|protein_coding|CODING|FBtr0302731|4|1),intron_variant(MODIFIER|||c.3445+6781G>T|3001|wb|protein_coding|CODING|FBtr0305063|4|1)
2L	14371518	.	C	T	30	PASS	EFF=intergenic_region(MODIFIER||||||||||1)
2L	14371527	.	T	C	30	PASS	EFF=intergenic_region(MODIFIER||||||||||1)
2L	14394162	.	G	C	30	PASS	EFF=intron_variant(MODIFIER|||c.70-1104C>G|552|elB|protein_coding|CODING|FBtr0080637|1|1),intron_variant(MODIFIER|||c.70-1101C>G|553|elB|protein_coding|CODING|FBtr0342915|1|1)
2L	14394642	.	T	C	30	PASS	EFF=intron_variant(MODIFIER|||c.70-1584A>G|552|elB|protein_coding|CODING|FBtr0080637|1|1),intron_variant(MODIFIER|||c.70-1581A>G|553|elB|protein_coding|CODING|FBtr0342915|1|1)
2L	14394648	.	A	G	30	PASS	EFF=intron_variant(MODIFIER|||c.70-1590T>C|552|elB|protein_coding|CODING|FBtr0080637|1|1),intron_variant(MODIFIER|||c.70-1587T>C|553|elB|protein_coding|CODING|FBtr0342915|1|1)
2L	14426947	.	G	A	30	PASS	EFF=intergenic_region(MODIFIER||||||||||1)
2L	14563898	.	T	C	30	PASS	EFF=upstream_gene_variant(MODIFIER||172||151|CG3473|protein_coding|CODING|FBtr0080661||1),upstream_gene_variant(MODIFIER||172||151|CG3473|protein_coding|CODING|FBtr0343700||1),intergenic_region(MODIFIER||||||||||1)
2L	15276542	.	G	C	30	PASS	EFF=intergenic_region(MODIFIER||||||||||1)
2L	15276549	.	A	T	30	PASS	EFF=intergenic_region(MODIFIER||||||||||1)
2L	15337255	.	C	A	30	PASS	EFF=intergenic_region(MODIFIER||||||||||1)
2L	15743886	.	A	G	30	PASS	EFF=intron_variant(MODIFIER|||c.29+2569T>C|712|CycE|protein_coding|CODING|FBtr0305561|1|1),intron_variant(MODIFIER|||c.-109+1506T>C|709|CycE|protein_coding|CODING|FBtr0080776|2|1),intron_variant(MODIFIER|||c.-109+2569T>C|709|CycE|protein_coding|CODING|FBtr0080775|1|1),intron_variant(MODIFIER|||c.-108-2987T>C|709|CycE|protein_coding|CODING|FBtr0080774|1|1),intron_variant(MODIFIER|||c.-108-2987T>C|…
2L	15757844	.	G	A	30	PASS	EFF=synonymous_variant(LOW||ttT/ttT|p.Phe728Phe/c.2184C>T|956|Gli|protein_coding|CODING|FBtr0080769|6|1|WARNING_REF_DOES_NOT_MATCH_GENOME),synonymous_variant(LOW||ttT/ttT|p.Phe728Phe/c.2184C>T|956|Gli|protein_coding|CODING|FBtr0080768|6|1|WARNING_REF_DOES_NOT_MATCH_GENOME),synonymous_variant(LOW||ttT/ttT|p.Phe728Phe/c.2184C>T|956|Gli|protein_coding|CODING|FBtr0080767|7|1|WARNING_REF_DOES_NOT_MATC…
2L	15881736	.	A	G	30	PASS	EFF=intergenic_region(MODIFIER||||||||||1)
2L	15906683	.	T	A	30	PASS	EFF=missense_variant(MODERATE|MISSENSE|Aat/Tat|p.Asn181Tyr/c.541A>T|327|beat-Ib|protein_coding|CODING|FBtr0300615|5|1),missense_variant(MODERATE|MISSENSE|Aat/Tat|p.Asn181Tyr/c.541A>T|327|beat-Ib|protein_coding|CODING|FBtr0080808|5|1)
2L	16295463	.	G	A	30	PASS	EFF=synonymous_variant(LOW||agA/agA|p.Arg371Arg/c.1113G>A|503|Cyp303a1|protein_coding|CODING|FBtr0080828|1|1|WARNING_REF_DOES_NOT_MATCH_GENOME),synonymous_variant(LOW||agA/agA|p.Arg371Arg/c.1113G>A|503|Cyp303a1|protein_coding|CODING|FBtr0343812|1|1|WARNING_REF_DOES_NOT_MATCH_GENOME),downstream_gene_variant(MODIFIER||588||359|heix|protein_coding|CODING|FBtr0080852||1)
2L	16400064	.	G	A	30	PASS	EFF=downstream_gene_variant(MODIFIER||111||455|CG5888|protein_coding|CODING|FBtr0080880||1),downstream_gene_variant(MODIFIER||111||455|CG5888|protein_coding|CODING|FBtr0340234||1),intergenic_region(MODIFIER||||||||||1)
2L	16510604	.	C	T	30	PASS	EFF=synonymous_variant(LOW|SILENT|gtG/gtA|p.Val546Val/c.1638G>A|701|CG5953|protein_coding|CODING|FBtr0337091|3|1),synonymous_variant(LOW|SILENT|gtG/gtA|p.Val546Val/c.1638G>A|701|CG5953|protein_coding|CODING|FBtr0080874|3|1),synonymous_variant(LOW|SILENT|gtG/gtA|p.Val546Val/c.1638G>A|701|CG5953|protein_coding|CODING|FBtr0080873|3|1),synonymous_variant(LOW|SILENT|gtG/gtA|p.Val318Val/c.954G>A|473|CG…
2L	16529919	.	A	G	30	PASS	EFF=upstream_gene_variant(MODIFIER||997|||snoRNA:Me28S-C1237||NON_CODING|FBtr0114314||1),intron_variant(MODIFIER|||c.-255-1480T>C|701|CG5953|protein_coding|CODING|FBtr0080874|1|1),intron_variant(MODIFIER|||c.-255-1480T>C|701|CG5953|protein_coding|CODING|FBtr0080873|1|1),intron_variant(MODIFIER|||c.-255-1480T>C|701|CG5953|protein_coding|CODING|FBtr0337091|1|1)
2L	16621164	.	C	A	30	PASS	EFF=intron_variant(MODIFIER|||c.1817-31579C>A|2064|CG42389|protein_coding|CODING|FBtr0300003|2|1),intron_variant(MODIFIER|||c.-96-672C>A|1762|CG42389|protein_coding|CODING|FBtr0300004|2|1),intron_variant(MODIFIER|||c.-96-672C>A|1779|CG42389|protein_coding|CODING|FBtr0335497|2|1)
2L	16634797	.	C	T	30	PASS	EFF=intron_variant(MODIFIER|||c.1817-17946C>T|2064|CG42389|protein_coding|CODING|FBtr0300003|2|1),intron_variant(MODIFIER|||c.910+11956C>T|1762|CG42389|protein_coding|CODING|FBtr0300004|3|1),intron_variant(MODIFIER|||c.961+21C>T|1779|CG42389|protein_coding|CODING|FBtr0335497|4|1)
2L	16666109	.	C	T	30	PASS	EFF=synonymous_variant(LOW||ccA/ccA|p.Pro919Pro/c.2757G>A|1188|Trpgamma|protein_coding|CODING|FBtr0335144|14|1|WARNING_REF_DOES_NOT_MATCH_GENOME),synonymous_variant(LOW||ccA/ccA|p.Pro859Pro/c.2577G>A|1128|Trpgamma|protein_coding|CODING|FBtr0080946|14|1|WARNING_REF_DOES_NOT_MATCH_GENOME),synonymous_variant(LOW||ccA/ccA|p.Pro859Pro/c.2577G>A|1128|Trpgamma|protein_coding|CODING|FBtr0080945|15|1|WARN…
2L	16666112	.	C	T	30	PASS	EFF=synonymous_variant(LOW||acA/acA|p.Thr918Thr/c.2754G>A|1188|Trpgamma|protein_coding|CODING|FBtr0335144|14|1|WARNING_REF_DOES_NOT_MATCH_GENOME),synonymous_variant(LOW||acA/acA|p.Thr858Thr/c.2574G>A|1128|Trpgamma|protein_coding|CODING|FBtr0080946|14|1|WARNING_REF_DOES_NOT_MATCH_GENOME),synonymous_variant(LOW||acA/acA|p.Thr858Thr/c.2574G>A|1128|Trpgamma|protein_coding|CODING|FBtr0080945|15|1|WARN…
2L	16740124	.	G	A	30	PASS	EFF=intron_variant(MODIFIER|||c.200-448G>A|577|ChLD3|protein_coding|CODING|FBtr0080892|1|1)
2L	17420488	.	G	C	30	PASS	EFF=intron_variant(MODIFIER|||c.-20-375C>G|667|Dif|protein_coding|CODING|FBtr0081008|1|1),intron_variant(MODIFIER|||c.-20-375C>G|987|Dif|protein_coding|CODING|FBtr0301577|1|1),intron_variant(MODIFIER|||c.-20-375C>G|667|Dif|protein_coding|CODING|FBtr0081009|1|1),intron_variant(MODIFIER|||c.-20-375C>G|667|Dif|protein_coding|CODING|FBtr0301578|1|1)
2L	17420506	.	A	T	30	PASS	EFF=intron_variant(MODIFIER|||c.-20-393T>A|667|Dif|protein_coding|CODING|FBtr0081008|1|1),intron_variant(MODIFIER|||c.-20-393T>A|987|Dif|protein_coding|CODING|FBtr0301577|1|1),intron_variant(MODIFIER|||c.-20-393T>A|667|Dif|protein_coding|CODING|FBtr0081009|1|1),intron_variant(MODIFIER|||c.-20-393T>A|667|Dif|protein_coding|CODING|FBtr0301578|1|1)
2L	17440464	.	T	G	30	PASS	EFF=synonymous_variant(LOW||gcC/gcC|p.Ala775Ala/c.2325A>C|999|dl|protein_coding|CODING|FBtr0340250|5|1|WARNING_REF_DOES_NOT_MATCH_GENOME),synonymous_variant(LOW||gcC/gcC|p.Ala775Ala/c.2325A>C|999|dl|protein_coding|CODING|FBtr0081007|6|1|WARNING_REF_DOES_NOT_MATCH_GENOME),intron_variant(MODIFIER|||c.989-1167A>C|677|dl|protein_coding|CODING|FBtr0081005|6|1),intron_variant(MODIFIER|||c.989-1167A>C|6…
2L	17632976	.	G	A	30	PASS	EFF=intergenic_region(MODIFIER||||||||||1)
2L	17698277	.	A	G	30	PASS	EFF=intron_variant(MODIFIER|||c.4186+9757T>C|3096|CadN|protein_coding|CODING|FBtr0081013|11|1),intron_variant(MODIFIER|||c.4186+9757T>C|3095|CadN|protein_coding|CODING|FBtr0081014|11|1),intron_variant(MODIFIER|||c.4186+9757T>C|3097|CadN|protein_coding|CODING|FBtr0081015|13|1),intron_variant(MODIFIER|||c.4186+9757T>C|3097|CadN|protein_coding|CODING|FBtr0081016|11|1),intron_variant(MODIFIER|||c.418…
2L	17791327	.	A	G	30	PASS	EFF=intron_variant(MODIFIER|||c.4685-1771T>C|1799|CadN2|protein_coding|CODING|FBtr0303836|11|1),intron_variant(MODIFIER|||c.4685-1771T>C|1799|CadN2|protein_coding|CODING|FBtr0308770|12|1)
2L	17878393	.	T	C	30	PASS	EFF=intergenic_region(MODIFIER||||||||||1)
2L	17883575	.	T	A	30	PASS	EFF=intergenic_region(MODIFIER||||||||||1)
2L	18383466	.	G	C	30	PASS	EFF=synonymous_variant(LOW||cgC/cgC|p.Arg36Arg/c.108G>C|401|Fas3|protein_coding|CODING|FBtr0340580|2|1|WARNING_REF_DOES_NOT_MATCH_GENOME),synonymous_variant(LOW||cgC/cgC|p.Arg36Arg/c.108G>C|475|Fas3|protein_coding|CODING|FBtr0112804|2|1|WARNING_REF_DOES_NOT_MATCH_GENOME),synonymous_variant(LOW||cgC/cgC|p.Arg36Arg/c.108G>C|557|Fas3|protein_coding|CODING|FBtr0344782|2|1|WARNING_REF_DOES_NOT_MATCH_G…
2L	19725926	.	G	A	30	PASS	EFF=synonymous_variant(LOW||acA/acA|p.Thr721Thr/c.2163G>A|2032|Lar|protein_coding|CODING|FBtr0331239|16|1|WARNING_REF_DOES_NOT_MATCH_GENOME),synonymous_variant(LOW||acA/acA|p.Thr718Thr/c.2154G>A|2029|Lar|protein_coding|CODING|FBtr0081260|13|1|WARNING_REF_DOES_NOT_MATCH_GENOME),synonymous_variant(LOW||acA/acA|p.Thr624Thr/c.1872G>A|1935|Lar|protein_coding|CODING|FBtr0331240|14|1|WARNING_REF_DOES_NO…
2L	19731233	.	A	G	30	PASS	EFF=3_prime_UTR_variant(MODIFIER||1071|c.*1071A>G|2032|Lar|protein_coding|CODING|FBtr0331239|20|1|WARNING_REF_DOES_NOT_MATCH_GENOME),3_prime_UTR_variant(MODIFIER||1071|c.*1071A>G|2029|Lar|protein_coding|CODING|FBtr0081260|17|1|WARNING_REF_DOES_NOT_MATCH_GENOME),3_prime_UTR_variant(MODIFIER||1071|c.*1071A>G|1935|Lar|protein_coding|CODING|FBtr0331240|18|1|WARNING_REF_DOES_NOT_MATCH_GENOME),3_prime_…
2L	19734171	.	A	G	30	PASS	EFF=synonymous_variant(LOW||ccC/ccC|p.Pro375Pro/c.1125T>C|811|CG10462|protein_coding|CODING|FBtr0305952|5|1|WARNING_REF_DOES_NOT_MATCH_GENOME),synonymous_variant(LOW||ccC/ccC|p.Pro339Pro/c.1017T>C|775|CG10462|protein_coding|CODING|FBtr0331244|4|1|WARNING_REF_DOES_NOT_MATCH_GENOME),synonymous_variant(LOW||ccC/ccC|p.Pro376Pro/c.1128T>C|812|CG10462|protein_coding|CODING|FBtr0081325|5|1|WARNING_REF_D…
2L	19736215	.	G	A	30	PASS	EFF=upstream_gene_variant(MODIFIER||495||776|CG10462|protein_coding|CODING|FBtr0100352||1),upstream_gene_variant(MODIFIER||495||775|CG10462|protein_coding|CODING|FBtr0331244||1),upstream_gene_variant(MODIFIER||235||812|CG10462|protein_coding|CODING|FBtr0081325||1),upstream_gene_variant(MODIFIER||235||776|CG10462|protein_coding|CODING|FBtr0100351||1),upstream_gene_variant(MODIFIER||235||811|CG1046…
2L	19744142	.	C	G	30	PASS	EFF=synonymous_variant(LOW||gaC/gaC|p.Asp3494Asp/c.10482G>C|3781|CG10631|protein_coding|CODING|FBtr0081324|7|1|WARNING_REF_DOES_NOT_MATCH_GENOME)
2L	19744172	.	T	C	30	PASS	EFF=synonymous_variant(LOW||ggG/ggG|p.Gly3484Gly/c.10452A>G|3781|CG10631|protein_coding|CODING|FBtr0081324|7|1|WARNING_REF_DOES_NOT_MATCH_GENOME)
2L	19748120	.	T	C	30	PASS	EFF=synonymous_variant(LOW||gtG/gtG|p.Val2168Val/c.6504A>G|3781|CG10631|protein_coding|CODING|FBtr0081324|7|1|WARNING_REF_DOES_NOT_MATCH_GENOME)
2L	19748171	.	T	A	30	PASS	EFF=synonymous_variant(LOW||ccT/ccT|p.Pro2151Pro/c.6453A>T|3781|CG10631|protein_coding|CODING|FBtr0081324|7|1|WARNING_REF_DOES_NOT_MATCH_GENOME)
2L	20845728	.	C	T	30	PASS	EFF=intron_variant(MODIFIER|||c.253+200C>T|159|CG31676|protein_coding|CODING|FBtr0081424|2|1),intron_variant(MODIFIER|||c.253+200C>T|159|CG31676|protein_coding|CODING|FBtr0339564|2|1)
2L	21329478	.	C	T	30	PASS	EFF=intergenic_region(MODIFIER||||||||||1)
2L	21864585	.	T	C	30	PASS	EFF=downstream_gene_variant(MODIFIER||361|||CR44918||NON_CODING|FBtr0343887||1),intron_variant(MODIFIER|||n.339-3640T>C||CR44917||NON_CODING|FBtr0343879|1|1)
2R	6591833	.	G	A	30	PASS	EFF=intron_variant(MODIFIER|||c.651-22272G>A|1744|jing|protein_coding|CODING|FBtr0114365|1|1)
2R	6821164	.	C	A	30	PASS	EFF=intron_variant(MODIFIER|||n.719-18G>T||CR44442||NON_CODING|FBtr0340501|2|1)
2R	7010869	.	A	C	30	PASS	EFF=intron_variant(MODIFIER|||c.61-15T>G|227|Tsp42Ed|protein_coding|CODING|FBtr0086181|1|1),intron_variant(MODIFIER|||c.61-15T>G|227|Tsp42Ed|protein_coding|CODING|FBtr0345536|1|1)
2R	7144125	.	A	G	30	PASS	EFF=intergenic_region(MODIFIER||||||||||1)
2R	7166926	.	A	G	30	PASS	EFF=intron_variant(MODIFIER|||c.38+15396A>G|963|pk|protein_coding|CODING|FBtr0089042|1|1)
2R	7167367	.	A	G	30	PASS	EFF=intron_variant(MODIFIER|||c.38+15837A>G|963|pk|protein_coding|CODING|FBtr0089042|1|1)
2R	7167500	.	T	C	30	PASS	EFF=intron_variant(MODIFIER|||c.38+15970T>C|963|pk|protein_coding|CODING|FBtr0089042|1|1)
2R	7167512	.	G	A	30	PASS	EFF=intron_variant(MODIFIER|||c.38+15982G>A|963|pk|protein_coding|CODING|FBtr0089042|1|1)
2R	7167552	.	T	C	30	PASS	EFF=intron_variant(MODIFIER|||c.38+16022T>C|963|pk|protein_coding|CODING|FBtr0089042|1|1)
2R	7168363	.	A	C	30	PASS	EFF=intron_variant(MODIFIER|||c.38+16833A>C|963|pk|protein_coding|CODING|FBtr0089042|1|1)
2R	7169814	.	A	G	30	PASS	EFF=intron_variant(MODIFIER|||c.38+18284A>G|963|pk|protein_coding|CODING|FBtr0089042|1|1)
2R	7171463	.	T	A	30	PASS	EFF=upstream_gene_variant(MODIFIER||710||1029|pk|protein_coding|CODING|FBtr0089043||1),intron_variant(MODIFIER|||c.38+19933T>A|963|pk|protein_coding|CODING|FBtr0089042|1|1)
2R	7172528	.	T	A	30	PASS	EFF=5_prime_UTR_variant(MODIFIER||105|c.-105T>A|1029|pk|protein_coding|CODING|FBtr0089043|1|1),intron_variant(MODIFIER|||c.38+20998T>A|963|pk|protein_coding|CODING|FBtr0089042|1|1)
2R	7179781	.	T	G	30	PASS	EFF=synonymous_variant(LOW|SILENT|ctT/ctG|p.Leu428Leu/c.1284T>G|720|CG33140|protein_coding|CODING|FBtr0089046|1|1),intron_variant(MODIFIER|||c.38+28251T>G|963|pk|protein_coding|CODING|FBtr0089042|1|1),intron_variant(MODIFIER|||c.236+6913T>G|1029|pk|protein_coding|CODING|FBtr0089043|1|1)
2R	7182362	.	A	G	30	PASS	EFF=missense_variant(MODERATE|MISSENSE|Aag/Gag|p.Lys335Glu/c.1003A>G|536|CG30385|protein_coding|CODING|FBtr0089047|1|1),upstream_gene_variant(MODIFIER||635||708|CG30384|protein_coding|CODING|FBtr0089048||1),intron_variant(MODIFIER|||c.39-26618A>G|963|pk|protein_coding|CODING|FBtr0089042|1|1),intron_variant(MODIFIER|||c.236+9494A>G|1029|pk|protein_coding|CODING|FBtr0089043|1|1)
2R	7186090	.	G	T	30	PASS	EFF=downstream_gene_variant(MODIFIER||792||708|CG30384|protein_coding|CODING|FBtr0089048||1),intron_variant(MODIFIER|||c.39-22890G>T|963|pk|protein_coding|CODING|FBtr0089042|1|1),intron_variant(MODIFIER|||c.236+13222G>T|1029|pk|protein_coding|CODING|FBtr0089043|1|1)
2R	7186929	.	C	G	30	PASS	EFF=upstream_gene_variant(MODIFIER||304||1299|pk|protein_coding|CODING|FBtr0089044||1),intron_variant(MODIFIER|||c.39-22051C>G|963|pk|protein_coding|CODING|FBtr0089042|1|1),intron_variant(MODIFIER|||c.236+14061C>G|1029|pk|protein_coding|CODING|FBtr0089043|1|1)
2R	7187453	.	A	G	30	PASS	EFF=5_prime_UTR_variant(MODIFIER||5534|c.-545A>G|1299|pk|protein_coding|CODING|FBtr0089044|1|1),intron_variant(MODIFIER|||c.39-21527A>G|963|pk|protein_coding|CODING|FBtr0089042|1|1),intron_variant(MODIFIER|||c.236+14585A>G|1029|pk|protein_coding|CODING|FBtr0089043|1|1)
2R	7188849	.	G	T	30	PASS	EFF=intron_variant(MODIFIER|||c.39-20131G>T|963|pk|protein_coding|CODING|FBtr0089042|1|1),intron_variant(MODIFIER|||c.236+15981G>T|1029|pk|protein_coding|CODING|FBtr0089043|1|1),intron_variant(MODIFIER|||c.-385+1236G>T|1299|pk|protein_coding|CODING|FBtr0089044|1|1)
2R	7191555	.	C	T	30	PASS	EFF=intron_variant(MODIFIER|||c.39-17425C>T|963|pk|protein_coding|CODING|FBtr0089042|1|1),intron_variant(MODIFIER|||c.237-17425C>T|1029|pk|protein_coding|CODING|FBtr0089043|1|1),intron_variant(MODIFIER|||c.-384-1048C>T|1299|pk|protein_coding|CODING|FBtr0089044|1|1)
2R	7336857	.	T	G	30	PASS	EFF=intron_variant(MODIFIER|||c.2158-4479A>C|2035|Dscam1|protein_coding|CODING|FBtr0306767|9|1|WARNING_TRANSCRIPT_INCOMPLETE),intron_variant(MODIFIER|||c.2149-4479A>C|2017|Dscam1|protein_coding|CODING|FBtr0306768|9|1|WARNING_TRANSCRIPT_INCOMPLETE),intron_variant(MODIFIER|||c.2149-4479A>C|2032|Dscam1|protein_coding|CODING|FBtr0306769|9|1|WARNING_TRANSCRIPT_INCOMPLETE),intron_variant(MODIFIER|||c.2…
2R	7405500	.	T	C	30	PASS	EFF=intron_variant(MODIFIER|||c.220+538A>G|504|Eaf|protein_coding|CODING|FBtr0089006|2|1),intron_variant(MODIFIER|||c.220+538A>G|504|Eaf|protein_coding|CODING|FBtr0089007|3|1),intron_variant(MODIFIER|||c.220+538A>G|504|Eaf|protein_coding|CODING|FBtr0089008|3|1),intron_variant(MODIFIER|||c.58+538A>G|450|Eaf|protein_coding|CODING|FBtr0089009|3|1)
2R	7405508	.	T	C	30	PASS	EFF=intron_variant(MODIFIER|||c.220+530A>G|504|Eaf|protein_coding|CODING|FBtr0089006|2|1),intron_variant(MODIFIER|||c.220+530A>G|504|Eaf|protein_coding|CODING|FBtr0089007|3|1),intron_variant(MODIFIER|||c.220+530A>G|504|Eaf|protein_coding|CODING|FBtr0089008|3|1),intron_variant(MODIFIER|||c.58+530A>G|450|Eaf|protein_coding|CODING|FBtr0089009|3|1)
2R	7482954	.	A	T	30	PASS	EFF=3_prime_UTR_variant(MODIFIER||440|c.*440T>A|832|wech|protein_coding|CODING|FBtr0300082|5|1|WARNING_REF_DOES_NOT_MATCH_GENOME),3_prime_UTR_variant(MODIFIER||440|c.*440T>A|832|wech|protein_coding|CODING|FBtr0300083|4|1|WARNING_REF_DOES_NOT_MATCH_GENOME),3_prime_UTR_variant(MODIFIER||440|c.*440T>A|832|wech|protein_coding|CODING|FBtr0300084|5|1|WARNING_REF_DOES_NOT_MATCH_GENOME),3_prime_UTR_varia…
2R	7545385	.	A	C	30	PASS	EFF=5_prime_UTR_variant(MODIFIER||9488|c.-905A>C|1397|Corin|protein_coding|CODING|FBtr0088909|1|1|WARNING_REF_DOES_NOT_MATCH_GENOME),intron_variant(MODIFIER|||c.-31+4861A>C|1397|Corin|protein_coding|CODING|FBtr0336996|1|1)
2R	7671285	.	G	T	30	PASS	EFF=upstream_gene_variant(MODIFIER||182||130|CG12826|protein_coding|CODING|FBtr0088943||1),intergenic_region(MODIFIER||||||||||1)
2R	7751503	.	C	G	30	PASS	EFF=intergenic_region(MODIFIER||||||||||1)
2R	7794941	.	T	C	30	PASS	EFF=synonymous_variant(LOW||gCa/gCa|p.Ala339Ala/c.1016T>C|2130|mus205|protein_coding|CODING|FBtr0088831|5|1|WARNING_REF_DOES_NOT_MATCH_GENOME)
2R	8500591	.	T	A	30	PASS	EFF=intron_variant(MODIFIER|||c.446-11232A>T|1095|mtt|protein_coding|CODING|FBtr0273326|2|1),intron_variant(MODIFIER|||c.446-6411A>T|1415|mtt|protein_coding|CODING|FBtr0273325|2|1),intron_variant(MODIFIER|||c.446-6411A>T|1472|mtt|protein_coding|CODING|FBtr0330608|2|1)
2R	8513987	.	G	A	30	PASS	EFF=intron_variant(MODIFIER|||c.445+7127C>T|1095|mtt|protein_coding|CODING|FBtr0273326|2|1),intron_variant(MODIFIER|||c.445+7127C>T|1415|mtt|protein_coding|CODING|FBtr0273325|2|1),intron_variant(MODIFIER|||c.445+7127C>T|1472|mtt|protein_coding|CODING|FBtr0330608|2|1)
2R	8538808	.	G	A	30	PASS	EFF=intergenic_region(MODIFIER||||||||||1)
2R	8549622	.	A	G	30	PASS	EFF=intergenic_region(MODIFIER||||||||||1)
2R	9012117	.	A	G	30	PASS	EFF=upstream_gene_variant(MODIFIER||53||561|CG8172|protein_coding|CODING|FBtr0301193||1),intron_variant(MODIFIER|||c.164-701T>C|371|CG8172|protein_coding|CODING|FBtr0301191|1|1),intron_variant(MODIFIER|||c.164-701T>C|545|CG8172|protein_coding|CODING|FBtr0301192|1|1)
2R	9012147	.	T	G	30	PASS	EFF=upstream_gene_variant(MODIFIER||83||561|CG8172|protein_coding|CODING|FBtr0301193||1),intron_variant(MODIFIER|||c.164-731A>C|371|CG8172|protein_coding|CODING|FBtr0301191|1|1),intron_variant(MODIFIER|||c.164-731A>C|545|CG8172|protein_coding|CODING|FBtr0301192|1|1)
2R	9012941	.	A	G	30	PASS	EFF=upstream_gene_variant(MODIFIER||877||561|CG8172|protein_coding|CODING|FBtr0301193||1),intron_variant(MODIFIER|||c.163+78T>C|371|CG8172|protein_coding|CODING|FBtr0301191|1|1),intron_variant(MODIFIER|||c.163+78T>C|545|CG8172|protein_coding|CODING|FBtr0301192|1|1)
2R	9013862	.	T	C	30	PASS	EFF=upstream_gene_variant(MODIFIER||336||371|CG8172|protein_coding|CODING|FBtr0301191||1),upstream_gene_variant(MODIFIER||336||545|CG8172|protein_coding|CODING|FBtr0301192||1),downstream_gene_variant(MODIFIER||506||389|CG13744|protein_coding|CODING|FBtr0088666||1),intergenic_region(MODIFIER||||||||||1)
2R	9018229	.	T	A	30	PASS	EFF=downstream_gene_variant(MODIFIER||803||855|CG8170|protein_coding|CODING|FBtr0088665||1),downstream_gene_variant(MODIFIER||803||778|CG8170|protein_coding|CODING|FBtr0110892||1),intron_variant(MODIFIER|||c.259+4T>A|222|CG13747|protein_coding|CODING|FBtr0088660|1|1)
2R	9028753	.	A	G	30	PASS	EFF=intron_variant(MODIFIER|||c.-678+1480T>C|855|CG8170|protein_coding|CODING|FBtr0088665|2|1),intron_variant(MODIFIER|||c.-678+1480T>C|778|CG8170|protein_coding|CODING|FBtr0110892|2|1)
2R	9394204	.	G	A	30	PASS	EFF=missense_variant(MODERATE|MISSENSE|Gat/Aat|p.Asp1065Asn/c.3193G>A|1374|l_2_03659|protein_coding|CODING|FBtr0302504|9|1),missense_variant(MODERATE|MISSENSE|Gat/Aat|p.Asp1065Asn/c.3193G>A|1374|l_2_03659|protein_coding|CODING|FBtr0332999|10|1)
2R	9668869	.	T	C	30	PASS	EFF=intron_variant(MODIFIER|||c.151-1095A>G|758|Mmp2|protein_coding|CODING|FBtr0088501|1|1)
2R	9920071	.	C	A	30	PASS	EFF=intron_variant(MODIFIER|||c.259-324G>T|540|Mef2|protein_coding|CODING|FBtr0088443|4|1),intron_variant(MODIFIER|||c.259-324G>T|516|Mef2|protein_coding|CODING|FBtr0088444|3|1),intron_variant(MODIFIER|||c.259-324G>T|515|Mef2|protein_coding|CODING|FBtr0088445|3|1),intron_variant(MODIFIER|||c.259-324G>T|509|Mef2|protein_coding|CODING|FBtr0088446|3|1),intron_variant(MODIFIER|||c.259-324G>T|501|Mef2…
2R	10013406	.	C	T	30	PASS	EFF=intron_variant(MODIFIER|||c.-7-8029G>A|377|Pka-R2|protein_coding|CODING|FBtr0088437|2|1),intron_variant(MODIFIER|||c.-7-8029G>A|377|Pka-R2|protein_coding|CODING|FBtr0088438|2|1),intron_variant(MODIFIER|||c.-7-8029G>A|373|Pka-R2|protein_coding|CODING|FBtr0112901|2|1),intron_variant(MODIFIER|||c.-7-8029G>A|376|Pka-R2|protein_coding|CODING|FBtr0112902|2|1)
2R	10526503	.	T	C	30	PASS	EFF=intergenic_region(MODIFIER||||||||||1)
2R	10685699	.	G	C	30	PASS	EFF=intron_variant(MODIFIER|||c.-221-5666G>C|3579|stan|protein_coding|CODING|FBtr0303223|1|1),intron_variant(MODIFIER|||c.-221-5666G>C|3574|stan|protein_coding|CODING|FBtr0304899|1|1),intron_variant(MODIFIER|||c.-221-5666G>C|3578|stan|protein_coding|CODING|FBtr0304900|1|1),intron_variant(MODIFIER|||c.-221-5666G>C|3648|stan|protein_coding|CODING|FBtr0330601|1|1),intron_variant(MODIFIER|||c.-221-56…
2R	10825241	.	T	C	30	PASS	EFF=intron_variant(MODIFIER|||c.1398-22T>C|949|CG12325|protein_coding|CODING|FBtr0088227|3|1),intron_variant(MODIFIER|||c.1398-22T>C|949|CG12325|protein_coding|CODING|FBtr0345930|3|1)
2R	11114396	.	G	A	30	PASS	EFF=intron_variant(MODIFIER|||c.-482+1644C>T|570|luna|protein_coding|CODING|FBtr0345675|1|1)
2R	11426497	.	A	G	30	PASS	EFF=intron_variant(MODIFIER|||c.10+945T>C|243|Drip|protein_coding|CODING|FBtr0331387|1|1),intron_variant(MODIFIER|||c.-3+1279T>C|239|Drip|protein_coding|CODING|FBtr0331389|1|1),intron_variant(MODIFIER|||c.16+2556T>C|245|Drip|protein_coding|CODING|FBtr0088141|1|1),intron_variant(MODIFIER|||c.16+2556T>C|245|Drip|protein_coding|CODING|FBtr0088142|2|1),intron_variant(MODIFIER|||c.16+2556T>C|278|Drip|…
2R	11426500	.	T	A	30	PASS	EFF=intron_variant(MODIFIER|||c.10+942A>T|243|Drip|protein_coding|CODING|FBtr0331387|1|1),intron_variant(MODIFIER|||c.-3+1276A>T|239|Drip|protein_coding|CODING|FBtr0331389|1|1),intron_variant(MODIFIER|||c.16+2553A>T|245|Drip|protein_coding|CODING|FBtr0088141|1|1),intron_variant(MODIFIER|||c.16+2553A>T|245|Drip|protein_coding|CODING|FBtr0088142|2|1),intron_variant(MODIFIER|||c.16+2553A>T|278|Drip|…
2R	11919080	.	G	A	30	PASS	EFF=non_coding_exon_variant(MODIFIER|||n.1206G>A||CR44305||NON_CODING|FBtr0339554|1|1)
2R	11921411	.	C	G	30	PASS	EFF=intergenic_region(MODIFIER||||||||||1)
2R	11921419	.	G	T	30	PASS	EFF=intergenic_region(MODIFIER||||||||||1)
2R	11923831	.	C	A	30	PASS	EFF=intergenic_region(MODIFIER||||||||||1)
2R	12263029	.	A	T	30	PASS	EFF=intron_variant(MODIFIER|||c.4-1714A>T|149|Cam|protein_coding|CODING|FBtr0088001|2|1),intron_variant(MODIFIER|||c.4-1714A>T|149|Cam|protein_coding|CODING|FBtr0304963|2|1),intron_variant(MODIFIER|||c.4-1714A>T|149|Cam|protein_coding|CODING|FBtr0345018|1|1)
2R	12968568	.	G	C	30	PASS	EFF=synonymous_variant(LOW||aGt/aGt|p.Ser919Ser/c.2756C>G|1601|Psc|protein_coding|CODING|FBtr0345375|5|1|WARNING_REF_DOES_NOT_MATCH_GENOME),synonymous_variant(LOW||aGt/aGt|p.Ser919Ser/c.2756C>G|1601|Psc|protein_coding|CODING|FBtr0345196|5|1|WARNING_REF_DOES_NOT_MATCH_GENOME),synonymous_variant(LOW||aGt/aGt|p.Ser919Ser/c.2756C>G|1601|Psc|protein_coding|CODING|FBtr0087798|5|1|WARNING_REF_DOES_NOT_M…
2R	13571765	.	G	A	30	PASS	EFF=synonymous_variant(LOW|SILENT|tcC/tcT|p.Ser234Ser/c.702C>T|278|CG42807|protein_coding|CODING|FBtr0346185|2|1),synonymous_variant(LOW|SILENT|tcC/tcT|p.Ser234Ser/c.702C>T|278|CG42807|protein_coding|CODING|FBtr0303819|2|1)
2R	14507477	.	C	A	30	PASS	EFF=synonymous_variant(LOW|SILENT|tcC/tcA|p.Ser643Ser/c.1929C>A|1670|Asx|protein_coding|CODING|FBtr0332929|6|1),synonymous_variant(LOW|SILENT|tcC/tcA|p.Ser642Ser/c.1926C>A|1560|Asx|protein_coding|CODING|FBtr0100154|5|1),synonymous_variant(LOW|SILENT|tcC/tcA|p.Ser642Ser/c.1926C>A|1669|Asx|protein_coding|CODING|FBtr0087493|6|1),intron_variant(MODIFIER|||c.1865-63C>A|1538|Asx|protein_coding|CODING|F…
2R	14877742	.	A	T	30	PASS	EFF=upstream_gene_variant(MODIFIER||44||503|Cyp6a19|protein_coding|CODING|FBtr0087453||1),upstream_gene_variant(MODIFIER||44||367|Cyp6a19|protein_coding|CODING|FBtr0339984||1),downstream_gene_variant(MODIFIER||88||502|Cyp6a23|protein_coding|CODING|FBtr0087452||1),intergenic_region(MODIFIER||||||||||1)
2R	15039630	.	A	C	30	PASS	EFF=synonymous_variant(LOW||ggC/ggC|p.Gly958Gly/c.2874A>C|1235|hbs|protein_coding|CODING|FBtr0345419|10|1|WARNING_REF_DOES_NOT_MATCH_GENOME),synonymous_variant(LOW||ggC/ggC|p.Gly958Gly/c.2874A>C|1235|hbs|protein_coding|CODING|FBtr0087414|10|1|WARNING_REF_DOES_NOT_MATCH_GENOME),synonymous_variant(LOW||ggC/ggC|p.Gly958Gly/c.2874A>C|1228|hbs|protein_coding|CODING|FBtr0087413|10|1|WARNING_REF_DOES_NO…
2R	15039651	.	A	C	30	PASS	EFF=synonymous_variant(LOW|SILENT|acA/acC|p.Thr965Thr/c.2895A>C|1235|hbs|protein_coding|CODING|FBtr0345419|10|1),synonymous_variant(LOW|SILENT|acA/acC|p.Thr965Thr/c.2895A>C|1235|hbs|protein_coding|CODING|FBtr0087414|10|1),synonymous_variant(LOW|SILENT|acA/acC|p.Thr965Thr/c.2895A>C|1228|hbs|protein_coding|CODING|FBtr0087413|10|1)
2R	15308741	.	A	G	30	PASS	EFF=intron_variant(MODIFIER|||c.-562+101T>C|1928|Trpm|protein_coding|CODING|FBtr0339079|1|1),intron_variant(MODIFIER|||c.-332+455T>C|1939|Trpm|protein_coding|CODING|FBtr0339074|1|1),intron_variant(MODIFIER|||c.-706+101T>C|1953|Trpm|protein_coding|CODING|FBtr0339081|1|1),intron_variant(MODIFIER|||c.-706+455T>C|1968|Trpm|protein_coding|CODING|FBtr0339080|1|1)
2R	15575777	.	G	A	30	PASS	EFF=intergenic_region(MODIFIER||||||||||1)
2R	15697372	.	G	T	30	PASS	EFF=missense_variant(MODERATE|MISSENSE|gaG/gaT|p.Glu141Asp/c.423G>T|300|CG33462|protein_coding|CODING|FBtr0087284|3|1),downstream_gene_variant(MODIFIER||894||287|CG33461|protein_coding|CODING|FBtr0302528||1)
2R	15877145	.	G	A	30	PASS	EFF=intron_variant(MODIFIER|||c.2312+27C>T|1480|sli|protein_coding|CODING|FBtr0330729|14|1),intron_variant(MODIFIER|||c.2312+27C>T|1469|sli|protein_coding|CODING|FBtr0330730|15|1),intron_variant(MODIFIER|||c.2384+27C>T|1504|sli|protein_coding|CODING|FBtr0330731|15|1),intron_variant(MODIFIER|||c.2312+27C>T|1480|sli|protein_coding|CODING|FBtr0330732|14|1),intron_variant(MODIFIER|||c.2384+27C>T|1504…
2R	15877146	.	G	A	30	PASS	EFF=intron_variant(MODIFIER|||c.2312+26C>T|1480|sli|protein_coding|CODING|FBtr0330729|14|1),intron_variant(MODIFIER|||c.2312+26C>T|1469|sli|protein_coding|CODING|FBtr0330730|15|1),intron_variant(MODIFIER|||c.2384+26C>T|1504|sli|protein_coding|CODING|FBtr0330731|15|1),intron_variant(MODIFIER|||c.2312+26C>T|1480|sli|protein_coding|CODING|FBtr0330732|14|1),intron_variant(MODIFIER|||c.2384+26C>T|1504…
2R	15994077	.	C	T	30	PASS	EFF=3_prime_UTR_variant(MODIFIER||151|c.*151G>A|1112|ATPCL|protein_coding|CODING|FBtr0300597|9|1),3_prime_UTR_variant(MODIFIER||151|c.*151G>A|1112|ATPCL|protein_coding|CODING|FBtr0300596|9|1),3_prime_UTR_variant(MODIFIER||151|c.*151G>A|1096|ATPCL|protein_coding|CODING|FBtr0340016|9|1),3_prime_UTR_variant(MODIFIER||151|c.*151G>A|1095|ATPCL|protein_coding|CODING|FBtr0300598|9|1),downstream_gene_var…
2R	16286498	.	G	A	30	PASS	EFF=missense_variant(MODERATE|MISSENSE|gGa/gAa|p.Gly942Glu/c.2825G>A|1227|CG9068|protein_coding|CODING|FBtr0087138|5|1),upstream_gene_variant(MODIFIER||244|||CR43728||NON_CODING|FBtr0329959||1)
2R	17263023	.	G	C	30	PASS	EFF=intron_variant(MODIFIER|||c.-465-12387G>C|667|mbl|protein_coding|CODING|FBtr0310346|2|1),intron_variant(MODIFIER|||c.-466+269G>C|697|mbl|protein_coding|CODING|FBtr0310347|1|1)
2R	18287168	.	T	C	30	PASS	EFF=synonymous_variant(LOW|SILENT|ggA/ggG|p.Gly295Gly/c.885A>G|939|sbb|protein_coding|CODING|FBtr0301549|4|1),synonymous_variant(LOW|SILENT|ggA/ggG|p.Gly285Gly/c.855A>G|929|sbb|protein_coding|CODING|FBtr0301548|5|1),synonymous_variant(LOW|SILENT|ggA/ggG|p.Gly285Gly/c.855A>G|929|sbb|protein_coding|CODING|FBtr0086766|3|1),synonymous_variant(LOW|SILENT|ggA/ggG|p.Gly285Gly/c.855A>G|2302|sbb|protein_c…
2R	18287440	.	T	C	30	PASS	EFF=missense_variant(MODERATE|MISSENSE|Acg/Gcg|p.Thr205Ala/c.613A>G|939|sbb|protein_coding|CODING|FBtr0301549|4|1),missense_variant(MODERATE|MISSENSE|Acg/Gcg|p.Thr195Ala/c.583A>G|929|sbb|protein_coding|CODING|FBtr0301548|5|1),missense_variant(MODERATE|MISSENSE|Acg/Gcg|p.Thr195Ala/c.583A>G|929|sbb|protein_coding|CODING|FBtr0086766|3|1),missense_variant(MODERATE|MISSENSE|Acg/Gcg|p.Thr195Ala/c.583A>…
2R	18517998	.	G	T	30	PASS	EFF=intron_variant(MODIFIER|||c.-41-1143G>T|675|CG43066|protein_coding|CODING|FBtr0304865|1|1),intron_variant(MODIFIER|||c.-41-1143G>T|721|CG43066|protein_coding|CODING|FBtr0304867|1|1)
2R	18533161	.	C	T	30	PASS	EFF=synonymous_variant(LOW|SILENT|atC/atT|p.Ile100Ile/c.300C>T|563|CG10924|protein_coding|CODING|FBtr0113093|2|1),synonymous_variant(LOW|SILENT|atC/atT|p.Ile175Ile/c.525C>T|638|CG10924|protein_coding|CODING|FBtr0086699|2|1)
2R	19186140	.	A	T	30	PASS	EFF=intron_variant(MODIFIER|||c.126+6282A>T|947|hppy|protein_coding|CODING|FBtr0086503|2|1),intron_variant(MODIFIER|||c.126+6282A>T|1218|hppy|protein_coding|CODING|FBtr0086504|2|1),intron_variant(MODIFIER|||c.126+6282A>T|968|hppy|protein_coding|CODING|FBtr0340454|2|1),intron_variant(MODIFIER|||c.126+6282A>T|1205|hppy|protein_coding|CODING|FBtr0340455|2|1),intron_variant(MODIFIER|||c.126+6282A>T|9…
2R	19186173	.	G	T	30	PASS	EFF=intron_variant(MODIFIER|||c.126+6315G>T|947|hppy|protein_coding|CODING|FBtr0086503|2|1),intron_variant(MODIFIER|||c.126+6315G>T|1218|hppy|protein_coding|CODING|FBtr0086504|2|1),intron_variant(MODIFIER|||c.126+6315G>T|968|hppy|protein_coding|CODING|FBtr0340454|2|1),intron_variant(MODIFIER|||c.126+6315G>T|1205|hppy|protein_coding|CODING|FBtr0340455|2|1),intron_variant(MODIFIER|||c.126+6315G>T|9…
2R	19554615	.	T	C	30	PASS	EFF=intron_variant(MODIFIER|||c.-111+9826A>G|260|sm|protein_coding|CODING|FBtr0308795|2|1),intron_variant(MODIFIER|||c.-111+9847A>G|260|sm|protein_coding|CODING|FBtr0110898|2|1),intron_variant(MODIFIER|||c.586+9847A>G|492|sm|protein_coding|CODING|FBtr0304655|6|1),intron_variant(MODIFIER|||c.601+9847A>G|497|sm|protein_coding|CODING|FBtr0304656|6|1),intron_variant(MODIFIER|||c.-111+11534A>G|260|sm|…
2R	19554914	.	G	A	30	PASS	EFF=intron_variant(MODIFIER|||c.-111+9527C>T|260|sm|protein_coding|CODING|FBtr0308795|2|1),intron_variant(MODIFIER|||c.-111+9548C>T|260|sm|protein_coding|CODING|FBtr0110898|2|1),intron_variant(MODIFIER|||c.586+9548C>T|492|sm|protein_coding|CODING|FBtr0304655|6|1),intron_variant(MODIFIER|||c.601+9548C>T|497|sm|protein_coding|CODING|FBtr0304656|6|1),intron_variant(MODIFIER|||c.-111+11235C>T|260|sm|…
2R	19555098	.	T	G	30	PASS	EFF=intron_variant(MODIFIER|||c.-111+9343A>C|260|sm|protein_coding|CODING|FBtr0308795|2|1),intron_variant(MODIFIER|||c.-111+9364A>C|260|sm|protein_coding|CODING|FBtr0110898|2|1),intron_variant(MODIFIER|||c.586+9364A>C|492|sm|protein_coding|CODING|FBtr0304655|6|1),intron_variant(MODIFIER|||c.601+9364A>C|497|sm|protein_coding|CODING|FBtr0304656|6|1),intron_variant(MODIFIER|||c.-111+11051A>C|260|sm|…
2R	19557204	.	G	A	30	PASS	EFF=intron_variant(MODIFIER|||c.-111+7237C>T|260|sm|protein_coding|CODING|FBtr0308795|2|1),intron_variant(MODIFIER|||c.-111+7258C>T|260|sm|protein_coding|CODING|FBtr0110898|2|1),intron_variant(MODIFIER|||c.586+7258C>T|492|sm|protein_coding|CODING|FBtr0304655|6|1),intron_variant(MODIFIER|||c.601+7258C>T|497|sm|protein_coding|CODING|FBtr0304656|6|1),intron_variant(MODIFIER|||c.-111+8945C>T|260|sm|p…
2R	19949776	.	A	C	30	PASS	EFF=intergenic_region(MODIFIER||||||||||1)
2R	20147610	.	G	T	30	PASS	EFF=downstream_gene_variant(MODIFIER||786||155|CG11041|protein_coding|CODING|FBtr0300692||1),intergenic_region(MODIFIER||||||||||1)
2R	20157004	.	G	T	30	PASS	EFF=intergenic_region(MODIFIER||||||||||1)
2R	20159660	.	G	A	30	PASS	EFF=intergenic_region(MODIFIER||||||||||1)
2R	20159667	.	C	T	30	PASS	EFF=intergenic_region(MODIFIER||||||||||1)
2R	20159671	.	A	G	30	PASS	EFF=intergenic_region(MODIFIER||||||||||1)
2R	20166157	.	G	A	30	PASS	EFF=intergenic_region(MODIFIER||||||||||1)
2R	20296133	.	C	T	30	PASS	EFF=intergenic_region(MODIFIER||||||||||1)
2R	20732044	.	A	T	30	PASS	EFF=intron_variant(MODIFIER|||c.253-2126A>T|367|dpr|protein_coding|CODING|FBtr0086238|2|1),intron_variant(MODIFIER|||c.253-2126A>T|367|dpr|protein_coding|CODING|FBtr0344877|2|1)
2R	21115975	.	G	C	30	PASS	EFF=intron_variant(MODIFIER|||c.43-5655G>C|460|ktub|protein_coding|CODING|FBtr0089600|1|1),intron_variant(MODIFIER|||c.43-5655G>C|469|ktub|protein_coding|CODING|FBtr0342842|1|1)
2R	21157311	.	G	A	30	PASS	EFF=intron_variant(MODIFIER|||c.-354-14C>T|980|CG30389|protein_coding|CODING|FBtr0071633|1|1),intron_variant(MODIFIER|||c.-354-14C>T|980|CG30389|protein_coding|CODING|FBtr0310423|1|1),intron_variant(MODIFIER|||c.-354-14C>T|980|CG30389|protein_coding|CODING|FBtr0071632|1|1),intron_variant(MODIFIER|||c.-354-14C>T|1037|CG30389|protein_coding|CODING|FBtr0330235|1|1),intron_variant(MODIFIER|||c.-354-1…
2R	21305930	.	C	T	30	PASS	EFF=synonymous_variant(LOW|SILENT|taC/taT|p.Tyr657Tyr/c.1971C>T|1500|CG42672|protein_coding|CODING|FBtr0302706|4|1),synonymous_variant(LOW|SILENT|taC/taT|p.Tyr709Tyr/c.2127C>T|1552|CG42672|protein_coding|CODING|FBtr0302707|4|1),synonymous_variant(LOW|SILENT|taC/taT|p.Tyr799Tyr/c.2397C>T|1642|CG42672|protein_coding|CODING|FBtr0344189|5|1),synonymous_variant(LOW|SILENT|taC/taT|p.Tyr657Tyr/c.1971C>T…
2R	21323854	.	A	T	30	PASS	EFF=upstream_gene_variant(MODIFIER||534||831|CG30394|protein_coding|CODING|FBtr0071613||1),upstream_gene_variant(MODIFIER||534||831|CG30394|protein_coding|CODING|FBtr0071614||1),intron_variant(MODIFIER|||c.-12+232A>T|3183|dom|protein_coding|CODING|FBtr0071602|1|1),intron_variant(MODIFIER|||c.-12+232A>T|3198|dom|protein_coding|CODING|FBtr0071603|1|1),intron_variant(MODIFIER|||c.-12+232A>T|2497|dom…
2R	21328200	.	G	A	30	PASS	EFF=synonymous_variant(LOW|SILENT|tcG/tcA|p.Ser686Ser/c.2058G>A|3233|dom|protein_coding|CODING|FBtr0342890|6|1),synonymous_variant(LOW|SILENT|tcG/tcA|p.Ser651Ser/c.1953G>A|2497|dom|protein_coding|CODING|FBtr0071604|5|1),synonymous_variant(LOW|SILENT|tcG/tcA|p.Ser651Ser/c.1953G>A|3183|dom|protein_coding|CODING|FBtr0071602|5|1),synonymous_variant(LOW|SILENT|tcG/tcA|p.Ser651Ser/c.1953G>A|3198|dom|pr…
2R	21328257	.	C	T	30	PASS	EFF=upstream_gene_variant(MODIFIER||6|||snoRNA:Me28S-A2589b||NON_CODING|FBtr0114300||1),intron_variant(MODIFIER|||c.1972+38C>T|3183|dom|protein_coding|CODING|FBtr0071602|5|1),intron_variant(MODIFIER|||c.1972+38C>T|3198|dom|protein_coding|CODING|FBtr0071603|5|1),intron_variant(MODIFIER|||c.1972+38C>T|2497|dom|protein_coding|CODING|FBtr0071604|5|1),intron_variant(MODIFIER|||c.2077+38C>T|3233|dom|pr…
2R	21517377	.	C	T	30	PASS	EFF=synonymous_variant(LOW||gaA/gaA|p.Glu405Glu/c.1215G>A|444|CG10494|protein_coding|CODING|FBtr0071699|4|1|WARNING_REF_DOES_NOT_MATCH_GENOME),synonymous_variant(LOW||gaA/gaA|p.Glu484Glu/c.1452G>A|523|CG10494|protein_coding|CODING|FBtr0071700|4|1|WARNING_REF_DOES_NOT_MATCH_GENOME),downstream_gene_variant(MODIFIER||136||468|MESK2|protein_coding|CODING|FBtr0089704||1),downstream_gene_variant(MODIFI…
2R	22217306	.	G	T	30	PASS	EFF=3_prime_UTR_variant(MODIFIER||212|c.*212C>A|275|CG30278|protein_coding|CODING|FBtr0345469|2|1|WARNING_REF_DOES_NOT_MATCH_GENOME),downstream_gene_variant(MODIFIER||99||275|CG30278|protein_coding|CODING|FBtr0345468||1),downstream_gene_variant(MODIFIER||211||275|CG30278|protein_coding|CODING|FBtr0071780||1),downstream_gene_variant(MODIFIER||42||509|ari-2|protein_coding|CODING|FBtr0071774||1)
2R	22217662	.	C	T	30	PASS	EFF=synonymous_variant(LOW||ttA/ttA|p.Leu228Leu/c.684G>A|275|CG30278|protein_coding|CODING|FBtr0345469|2|1|WARNING_REF_DOES_NOT_MATCH_GENOME),synonymous_variant(LOW||ttA/ttA|p.Leu228Leu/c.684G>A|275|CG30278|protein_coding|CODING|FBtr0345468|2|1|WARNING_REF_DOES_NOT_MATCH_GENOME),synonymous_variant(LOW||ttA/ttA|p.Leu228Leu/c.684G>A|275|CG30278|protein_coding|CODING|FBtr0071780|2|1|WARNING_REF_DOES…
2R	23805951	.	G	A	30	PASS	EFF=3_prime_UTR_variant(MODIFIER||122|c.*122G>A|296|CG5539|protein_coding|CODING|FBtr0343269|1|1),downstream_gene_variant(MODIFIER||410||723|Ssrp|protein_coding|CODING|FBtr0072242||1),downstream_gene_variant(MODIFIER||63||296|CG5539|protein_coding|CODING|FBtr0072123||1),intron_variant(MODIFIER|||c.210+29C>T|176|CG13561|protein_coding|CODING|FBtr0343271|2|1)
2R	23805953	.	A	C	30	PASS	EFF=3_prime_UTR_variant(MODIFIER||124|c.*124A>C|296|CG5539|protein_coding|CODING|FBtr0343269|1|1),downstream_gene_variant(MODIFIER||408||723|Ssrp|protein_coding|CODING|FBtr0072242||1),downstream_gene_variant(MODIFIER||65||296|CG5539|protein_coding|CODING|FBtr0072123||1),intron_variant(MODIFIER|||c.210+27T>G|176|CG13561|protein_coding|CODING|FBtr0343271|2|1)
2R	23820718	.	T	A	30	PASS	EFF=intron_variant(MODIFIER|||c.-29+123T>A|1188|CG5549|protein_coding|CODING|FBtr0301162|1|1)
2R	23849190	.	A	C	30	PASS	EFF=downstream_gene_variant(MODIFIER||56||245|eIF6|protein_coding|CODING|FBtr0072235||1),intron_variant(MODIFIER|||c.243-391T>G|194|ytr|protein_coding|CODING|FBtr0072234|2|1),intron_variant(MODIFIER|||c.243-391T>G|194|ytr|protein_coding|CODING|FBtr0343278|3|1)
2R	23849197	.	A	C	30	PASS	EFF=downstream_gene_variant(MODIFIER||49||245|eIF6|protein_coding|CODING|FBtr0072235||1),intron_variant(MODIFIER|||c.243-398T>G|194|ytr|protein_coding|CODING|FBtr0072234|2|1),intron_variant(MODIFIER|||c.243-398T>G|194|ytr|protein_coding|CODING|FBtr0343278|3|1)
2R	24095357	.	G	A	30	PASS	EFF=synonymous_variant(LOW|SILENT|ctC/ctT|p.Leu727Leu/c.2181C>T|1637|gek|protein_coding|CODING|FBtr0072287|4|1)
2R	24159823	.	G	A	30	PASS	EFF=synonymous_variant(LOW|SILENT|aaG/aaA|p.Lys100Lys/c.300G>A|534|spag|protein_coding|CODING|FBtr0072256|2|1)
3L	3143150	.	G	A	30	PASS	EFF=5_prime_UTR_variant(MODIFIER||242|c.-242C>T|488|CG11537|protein_coding|CODING|FBtr0073115|1|1),upstream_gene_variant(MODIFIER||658||424|CG1291|protein_coding|CODING|FBtr0073023||1)
3L	7322406	.	G	A	30	PASS	EFF=synonymous_variant(LOW|SILENT|aaC/aaT|p.Asn261Asn/c.783C>T|647|RhoGEF4|protein_coding|CODING|FBtr0076885|3|1),synonymous_variant(LOW|SILENT|aaC/aaT|p.Asn214Asn/c.642C>T|600|RhoGEF4|protein_coding|CODING|FBtr0076886|2|1)
3L	7325592	.	T	A	30	PASS	EFF=synonymous_variant(LOW|SILENT|acT/acA|p.Thr566Thr/c.1698T>A|724|Rint1|protein_coding|CODING|FBtr0076838|4|1),downstream_gene_variant(MODIFIER||681||478|CG8602|protein_coding|CODING|FBtr0076884||1),downstream_gene_variant(MODIFIER||933||478|CG8602|protein_coding|CODING|FBtr0332734||1)
3L	7346394	.	C	T	30	PASS	EFF=missense_variant(MODERATE|MISSENSE|Gcc/Acc|p.Ala218Thr/c.652G>A|407|CG14834|protein_coding|CODING|FBtr0076880|1|1),downstream_gene_variant(MODIFIER||916||160|Srp19|protein_coding|CODING|FBtr0076879||1)
3L	7471487	.	C	T	30	PASS	EFF=upstream_gene_variant(MODIFIER||72||275|CG8541|protein_coding|CODING|FBtr0076862||1),intergenic_region(MODIFIER||||||||||1)
3L	8068806	.	A	G	30	PASS	EFF=synonymous_variant(LOW||atC/atC|p.Ile154Ile/c.462T>C|280|CG42590|protein_coding|CODING|FBtr0301744|1|1|WARNING_REF_DOES_NOT_MATCH_GENOME),upstream_gene_variant(MODIFIER||516|||tRNA:CR32363||NON_CODING|FBtr0076739||1),downstream_gene_variant(MODIFIER||647||159|CG42591|protein_coding|CODING|FBtr0301743||1),intron_variant(MODIFIER|||c.-848-2146A>G|1730|Ect4|protein_coding|CODING|FBtr0304998|1|1)
3L	10212284	.	C	T	30	PASS	EFF=intergenic_region(MODIFIER||||||||||1)
3L	10650367	.	A	T	30	PASS	EFF=intron_variant(MODIFIER|||c.184-3241T>A|324|CG32066|protein_coding|CODING|FBtr0076277|2|1),intron_variant(MODIFIER|||c.184-3241T>A|324|CG32066|protein_coding|CODING|FBtr0076278|1|1)
3L	10879470	.	C	G	30	PASS	EFF=missense_variant(MODERATE|MISSENSE|Caa/Gaa|p.Gln83Glu/c.247C>G|169|Blos4|protein_coding|CODING|FBtr0333403|2|1),missense_variant(MODERATE|MISSENSE|Caa/Gaa|p.Gln83Glu/c.247C>G|169|Blos4|protein_coding|CODING|FBtr0076269|2|1),upstream_gene_variant(MODIFIER||433||791|CG6418|protein_coding|CODING|FBtr0076274||1)
3L	11170917	.	C	T	30	PASS	EFF=synonymous_variant(LOW|SILENT|gaC/gaT|p.Asp241Asp/c.723C>T|557|CG7616|protein_coding|CODING|FBtr0076161|2|1),synonymous_variant(LOW|SILENT|gaC/gaT|p.Asp241Asp/c.723C>T|557|CG7616|protein_coding|CODING|FBtr0331829|2|1)
3L	11357940	.	C	G	30	PASS	EFF=intergenic_region(MODIFIER||||||||||1)
3L	11632516	.	A	T	30	PASS	EFF=downstream_gene_variant(MODIFIER||189|||CR45158||NON_CODING|FBtr0344953||1),intron_variant(MODIFIER|||c.-488+926A>T|623|CG32091|protein_coding|CODING|FBtr0076106|1|1)
3L	11990654	.	C	A	30	PASS	EFF=upstream_gene_variant(MODIFIER||82||290|CG6931|protein_coding|CODING|FBtr0076048||1),downstream_gene_variant(MODIFIER||149||1229|CG6938|protein_coding|CODING|FBtr0290131||1),downstream_gene_variant(MODIFIER||149||1245|CG6938|protein_coding|CODING|FBtr0330171||1),intergenic_region(MODIFIER||||||||||1)
3L	12204401	.	C	A	30	PASS	EFF=3_prime_UTR_variant(MODIFIER||280|c.*44G>T|383|CG5626|protein_coding|CODING|FBtr0076016|5|1|WARNING_REF_DOES_NOT_MATCH_GENOME),upstream_gene_variant(MODIFIER||466||201|Adk1|protein_coding|CODING|FBtr0076017||1),upstream_gene_variant(MODIFIER||319||229|Adk1|protein_coding|CODING|FBtr0076018||1)
3L	12214848	.	A	T	30	PASS	EFF=upstream_gene_variant(MODIFIER||398||476|app|protein_coding|CODING|FBtr0334103||1),intron_variant(MODIFIER|||c.537+770T>A|398|app|protein_coding|CODING|FBtr0301052|6|1),intron_variant(MODIFIER|||c.537+770T>A|398|app|protein_coding|CODING|FBtr0301053|5|1),intron_variant(MODIFIER|||c.537+770T>A|755|app|protein_coding|CODING|FBtr0301054|6|1),intron_variant(MODIFIER|||c.537+770T>A|755|app|protein…
3L	12287678	.	C	A	30	PASS	EFF=intergenic_region(MODIFIER||||||||||1)
3L	12337733	.	G	T	30	PASS	EFF=downstream_gene_variant(MODIFIER||497||95|CG10418|protein_coding|CODING|FBtr0075954||1),downstream_gene_variant(MODIFIER||34|||CR45444||NON_CODING|FBtr0345915||1),intergenic_region(MODIFIER||||||||||1)
3L	12337762	.	A	G	30	PASS	EFF=downstream_gene_variant(MODIFIER||526||95|CG10418|protein_coding|CODING|FBtr0075954||1),downstream_gene_variant(MODIFIER||63|||CR45444||NON_CODING|FBtr0345915||1),intergenic_region(MODIFIER||||||||||1)
3L	14697806	.	T	C	30	PASS	EFF=missense_variant(MODERATE|MISSENSE|cAt/cGt|p.His172Arg/c.515A>G|335|CG17177|protein_coding|CODING|FBtr0333018|1|1),missense_variant(MODERATE|MISSENSE|cAt/cGt|p.His1170Arg/c.3509A>G|1333|CG17177|protein_coding|CODING|FBtr0075710|2|1),upstream_gene_variant(MODIFIER||701||148|CG13474|protein_coding|CODING|FBtr0075711||1),intron_variant(MODIFIER|||c.411+17019T>C|923|ome|protein_coding|CODING|FBtr…
3L	15604152	.	T	C	30	PASS	EFF=intron_variant(MODIFIER|||c.899-684T>C|301|RhoGAP71E|protein_coding|CODING|FBtr0332092|4|1),intron_variant(MODIFIER|||c.899-2507T>C|454|RhoGAP71E|protein_coding|CODING|FBtr0332093|4|1),intron_variant(MODIFIER|||c.1780-684T>C|896|RhoGAP71E|protein_coding|CODING|FBtr0075569|5|1),intron_variant(MODIFIER|||c.1780-684T>C|906|RhoGAP71E|protein_coding|CODING|FBtr0290065|5|1),intron_variant(MODIFIER|…
3L	16900431	.	G	A	30	PASS	EFF=missense_variant(MODERATE|MISSENSE|Gag/Aag|p.Glu127Lys/c.379G>A|2147|Lmpt|protein_coding|CODING|FBtr0302786|1|1),missense_variant(MODERATE|MISSENSE|Gag/Aag|p.Glu127Lys/c.379G>A|694|Lmpt|protein_coding|CODING|FBtr0302787|1|1),missense_variant(MODERATE|MISSENSE|Gag/Aag|p.Glu127Lys/c.379G>A|989|Lmpt|protein_coding|CODING|FBtr0302785|1|1),intron_variant(MODIFIER|||c.789+2803G>A|559|Lmpt|protein_c…
3L	18873910	.	T	C	30	PASS	EFF=missense_variant(MODERATE|MISSENSE|Tct/Cct|p.Ser260Pro/c.778T>C|1548|Ugt|protein_coding|CODING|FBtr0075064|2|1)
3L	21501502	.	G	A	30	PASS	EFF=missense_variant(MODERATE|MISSENSE|tGc/tAc|p.Cys13Tyr/c.38G>A|559|Est-Q|protein_coding|CODING|FBtr0078354|1|1),intron_variant(MODIFIER|||c.2665-575C>T|1103|Glg1|protein_coding|CODING|FBtr0078388|4|1),intron_variant(MODIFIER|||c.2677-575C>T|1107|Glg1|protein_coding|CODING|FBtr0332717|4|1)
3L	22876613	.	C	A	30	PASS	EFF=synonymous_variant(LOW|SILENT|cgG/cgT|p.Arg420Arg/c.1260G>T|926|Chro|protein_coding|CODING|FBtr0346095|4|1),synonymous_variant(LOW|SILENT|cgG/cgT|p.Arg420Arg/c.1260G>T|926|Chro|protein_coding|CODING|FBtr0078570|3|1),synonymous_variant(LOW|SILENT|cgG/cgT|p.Arg420Arg/c.1260G>T|926|Chro|protein_coding|CODING|FBtr0078569|4|1),synonymous_variant(LOW|SILENT|cgG/cgT|p.Arg420Arg/c.1260G>T|926|Chro|pr…
3L	22876987	.	T	A	30	PASS	EFF=missense_variant(MODERATE|MISSENSE|Aca/Tca|p.Thr296Ser/c.886A>T|926|Chro|protein_coding|CODING|FBtr0346095|4|1),missense_variant(MODERATE|MISSENSE|Aca/Tca|p.Thr296Ser/c.886A>T|926|Chro|protein_coding|CODING|FBtr0078570|3|1),missense_variant(MODERATE|MISSENSE|Aca/Tca|p.Thr296Ser/c.886A>T|926|Chro|protein_coding|CODING|FBtr0078569|4|1),missense_variant(MODERATE|MISSENSE|Aca/Tca|p.Thr296Ser/c.88…
3R	4360756	.	A	G	30	PASS	EFF=intron_variant(MODIFIER|||c.-31+789A>G|633|CG1090|protein_coding|CODING|FBtr0335202|1|1),intron_variant(MODIFIER|||c.-31+469A>G|208|CG1090|protein_coding|CODING|FBtr0332449|1|1),intron_variant(MODIFIER|||c.-31+469A>G|633|CG1090|protein_coding|CODING|FBtr0335201|1|1),intron_variant(MODIFIER|||c.-31+256A>G|633|CG1090|protein_coding|CODING|FBtr0335203|1|1)
3R	5761202	.	G	A	30	PASS	EFF=3_prime_UTR_variant(MODIFIER||23|c.*23C>T|197|CG2082|protein_coding|CODING|FBtr0300913|7|1),3_prime_UTR_variant(MODIFIER||23|c.*23C>T|201|CG2082|protein_coding|CODING|FBtr0078676|6|1),3_prime_UTR_variant(MODIFIER||212|c.*212C>T|211|CG2082|protein_coding|CODING|FBtr0300912|7|1),intron_variant(MODIFIER|||c.582+35C>T|363|CG2082|protein_coding|CODING|FBtr0300907|7|1),intron_variant(MODIFIER|||c.5…
3R	5963610	.	A	G	30	PASS	EFF=intergenic_region(MODIFIER||||||||||1)
3R	7670488	.	T	C	30	PASS	EFF=intron_variant(MODIFIER|||c.1320-2464T>C|1354|Nlg1|protein_coding|CODING|FBtr0081541|6|1),intron_variant(MODIFIER|||c.1320-2464T>C|1354|Nlg1|protein_coding|CODING|FBtr0305969|6|1)
3R	7679204	.	G	C	30	PASS	EFF=intron_variant(MODIFIER|||c.1619+3742G>C|1354|Nlg1|protein_coding|CODING|FBtr0081541|8|1),intron_variant(MODIFIER|||c.1619+3742G>C|1354|Nlg1|protein_coding|CODING|FBtr0305969|8|1)
3R	7692086	.	T	A	30	PASS	EFF=missense_variant(MODERATE|MISSENSE|gaT/gaA|p.Asp817Glu/c.2451T>A|1354|Nlg1|protein_coding|CODING|FBtr0305969|12|1),missense_variant(MODERATE|MISSENSE|gaT/gaA|p.Asp817Glu/c.2451T>A|1354|Nlg1|protein_coding|CODING|FBtr0081541|12|1)
3R	7714992	.	T	C	30	PASS	EFF=intergenic_region(MODIFIER||||||||||1)
3R	7721420	.	C	A	30	PASS	EFF=upstream_gene_variant(MODIFIER||997||449|CG2616|protein_coding|CODING|FBtr0081738||1),upstream_gene_variant(MODIFIER||997||449|CG2616|protein_coding|CODING|FBtr0339179||1),downstream_gene_variant(MODIFIER||296|||CR44260||NON_CODING|FBtr0339178||1),intergenic_region(MODIFIER||||||||||1)
3R	7784953	.	A	G	30	PASS	EFF=synonymous_variant(LOW|SILENT|ttT/ttC|p.Phe141Phe/c.423T>C|433|CG18745|protein_coding|CODING|FBtr0081777|3|1)
3R	7834717	.	G	A	30	PASS	EFF=intron_variant(MODIFIER|||c.355-1985G>A|1895|CG34384|protein_coding|CODING|FBtr0112625|2|1),intron_variant(MODIFIER|||c.355-1985G>A|1918|CG34384|protein_coding|CODING|FBtr0304918|2|1),intron_variant(MODIFIER|||c.355-1985G>A|1871|CG34384|protein_coding|CODING|FBtr0304919|2|1),intron_variant(MODIFIER|||c.355-1985G>A|1936|CG34384|protein_coding|CODING|FBtr0304920|2|1),intron_variant(MODIFIER|||c…
3R	8049233	.	A	T	30	PASS	EFF=missense_variant(MODERATE|MISSENSE|Act/Tct|p.Thr20Ser/c.58A>T|56|CG43618|protein_coding|CODING|FBtr0309894|1|1),upstream_gene_variant(MODIFIER||440||53|CG43061|protein_coding|CODING|FBtr0304645||1),intron_variant(MODIFIER|||c.*39-6021A>T|95|CG43060|protein_coding|CODING|FBtr0304643|2|1)
3R	10796577	.	G	A	30	PASS	EFF=missense_variant(MODERATE|MISSENSE|tCg/tTg|p.Ser2068Leu/c.6203C>T|2838|CG14692|protein_coding|CODING|FBtr0344134|15|1)
3R	11007868	.	T	C	30	PASS	EFF=intron_variant(MODIFIER|||c.92-4146T>C|1087|CG34114|protein_coding|CODING|FBtr0110808|2|1),intron_variant(MODIFIER|||c.92-4146T>C|760|CG34114|protein_coding|CODING|FBtr0301070|2|1)
3R	11106685	.	A	G	30	PASS	EFF=intergenic_region(MODIFIER||||||||||1)
3R	14347212	.	A	G	30	PASS	EFF=intron_variant(MODIFIER|||c.-14-2028T>C|721|NK7.1|protein_coding|CODING|FBtr0306742|3|1),intron_variant(MODIFIER|||c.-14-2028T>C|721|NK7.1|protein_coding|CODING|FBtr0082942|2|1),intron_variant(MODIFIER|||c.-14-2028T>C|721|NK7.1|protein_coding|CODING|FBtr0082941|1|1)
3R	14762559	.	A	G	30	PASS	EFF=intron_variant(MODIFIER|||c.414+19968A>G|1153|jvl|protein_coding|CODING|FBtr0305690|1|1),intron_variant(MODIFIER|||c.414+19968A>G|1315|jvl|protein_coding|CODING|FBtr0305692|1|1),intron_variant(MODIFIER|||c.414+19968A>G|1151|jvl|protein_coding|CODING|FBtr0305694|1|1),intron_variant(MODIFIER|||c.-686+12286A>G|958|jvl|protein_coding|CODING|FBtr0305691|2|1),intron_variant(MODIFIER|||c.-169+12286A…
3R	15384344	.	C	T	30	PASS	EFF=intron_variant(MODIFIER|||c.504+654C>T|1584|Rbp|protein_coding|CODING|FBtr0304823|2|1),intron_variant(MODIFIER|||c.504+654C>T|1298|Rbp|protein_coding|CODING|FBtr0304824|2|1),intron_variant(MODIFIER|||c.549+609C>T|1599|Rbp|protein_coding|CODING|FBtr0304822|2|1),intron_variant(MODIFIER|||c.1203+609C>T|1844|Rbp|protein_coding|CODING|FBtr0304826|6|1),intron_variant(MODIFIER|||c.1203+609C>T|1817|R…
3R	15384374	.	T	A	30	PASS	EFF=intron_variant(MODIFIER|||c.504+684T>A|1584|Rbp|protein_coding|CODING|FBtr0304823|2|1),intron_variant(MODIFIER|||c.504+684T>A|1298|Rbp|protein_coding|CODING|FBtr0304824|2|1),intron_variant(MODIFIER|||c.549+639T>A|1599|Rbp|protein_coding|CODING|FBtr0304822|2|1),intron_variant(MODIFIER|||c.1203+639T>A|1844|Rbp|protein_coding|CODING|FBtr0304826|6|1),intron_variant(MODIFIER|||c.1203+639T>A|1817|R…
3R	16118994	.	G	A	30	PASS	EFF=intron_variant(MODIFIER|||c.-741+2435G>A|787|Sb|protein_coding|CODING|FBtr0344008|1|1)
3R	17093524	.	C	A	30	PASS	EFF=synonymous_variant(LOW|SILENT|tcG/tcT|p.Ser1737Ser/c.5211G>T|2210|cher|protein_coding|CODING|FBtr0089471|15|1),synonymous_variant(LOW|SILENT|tcG/tcT|p.Ser384Ser/c.1152G>T|857|cher|protein_coding|CODING|FBtr0290015|5|1),synonymous_variant(LOW|SILENT|tcG/tcT|p.Ser365Ser/c.1095G>T|838|cher|protein_coding|CODING|FBtr0089473|4|1),synonymous_variant(LOW|SILENT|tcG/tcT|p.Ser1926Ser/c.5778G>T|2399|ch…
3R	17611211	.	C	G	30	PASS	EFF=synonymous_variant(LOW|SILENT|gcG/gcC|p.Ala68Ala/c.204G>C|159|Edg91|protein_coding|CODING|FBtr0083502|2|1),synonymous_variant(LOW|SILENT|gcG/gcC|p.Ala60Ala/c.180G>C|151|Edg91|protein_coding|CODING|FBtr0300767|1|1),downstream_gene_variant(MODIFIER||678||301|CG14329|protein_coding|CODING|FBtr0083463||1)
3R	18024311	.	C	T	30	PASS	EFF=synonymous_variant(LOW|SILENT|Cta/Tta|p.Leu149Leu/c.445C>T|455|CG7794|protein_coding|CODING|FBtr0083540|2|1),downstream_gene_variant(MODIFIER||622||256|CG7785|protein_coding|CODING|FBtr0083539||1)
3R	19210854	.	G	A	30	PASS	EFF=intergenic_region(MODIFIER||||||||||1)
3R	19229891	.	C	G	30	PASS	EFF=synonymous_variant(LOW||acG/acG|p.Thr109Thr/c.327C>G|368|CG3773|protein_coding|CODING|FBtr0083737|2|1|WARNING_REF_DOES_NOT_MATCH_GENOME),upstream_gene_variant(MODIFIER||615||311|CG5250|protein_coding|CODING|FBtr0083743||1),downstream_gene_variant(MODIFIER||873||2776|unc79|protein_coding|CODING|FBtr0301692||1),downstream_gene_variant(MODIFIER||873||3028|unc79|protein_coding|CODING|FBtr0301693|…
3R	19229921	.	A	G	30	PASS	EFF=synonymous_variant(LOW||ctG/ctG|p.Leu119Leu/c.357A>G|368|CG3773|protein_coding|CODING|FBtr0083737|2|1|WARNING_REF_DOES_NOT_MATCH_GENOME),upstream_gene_variant(MODIFIER||645||311|CG5250|protein_coding|CODING|FBtr0083743||1),downstream_gene_variant(MODIFIER||843||2776|unc79|protein_coding|CODING|FBtr0301692||1),downstream_gene_variant(MODIFIER||843||3028|unc79|protein_coding|CODING|FBtr0301693|…
3R	19230743	.	C	T	30	PASS	EFF=3_prime_UTR_variant(MODIFIER||16|c.*16C>T|368|CG3773|protein_coding|CODING|FBtr0083737|3|1|WARNING_REF_DOES_NOT_MATCH_GENOME),downstream_gene_variant(MODIFIER||21||2776|unc79|protein_coding|CODING|FBtr0301692||1),downstream_gene_variant(MODIFIER||21||3028|unc79|protein_coding|CODING|FBtr0301693||1),downstream_gene_variant(MODIFIER||21||2783|unc79|protein_coding|CODING|FBtr0344552||1),downstre…
3R	23746116	.	T	C	30	PASS	EFF=intron_variant(MODIFIER|||c.-48-980T>C|920|Hmgcr|protein_coding|CODING|FBtr0084450|1|1)
3R	25456573	.	C	G	30	PASS	EFF=intron_variant(MODIFIER|||c.-96+15909G>C|892|Fur1|protein_coding|CODING|FBtr0089985|1|1),intron_variant(MODIFIER|||c.-161+4792G>C|892|Fur1|protein_coding|CODING|FBtr0089987|2|1),intron_variant(MODIFIER|||c.-161+15909G>C|1101|Fur1|protein_coding|CODING|FBtr0089982|1|1),intron_variant(MODIFIER|||c.-161+15909G>C|1269|Fur1|protein_coding|CODING|FBtr0089983|1|1),intron_variant(MODIFIER|||c.-161+15…
3R	25988388	.	C	T	30	PASS	EFF=synonymous_variant(LOW|SILENT|gaC/gaT|p.Asp1452Asp/c.4356C>T|2746|Nf1|protein_coding|CODING|FBtr0084953|10|1),synonymous_variant(LOW|SILENT|gaC/gaT|p.Asp1452Asp/c.4356C>T|2802|Nf1|protein_coding|CODING|FBtr0084952|10|1),synonymous_variant(LOW|SILENT|gaC/gaT|p.Asp1452Asp/c.4356C>T|2734|Nf1|protein_coding|CODING|FBtr0330183|10|1),synonymous_variant(LOW|SILENT|gaC/gaT|p.Asp1452Asp/c.4356C>T|2793…
3R	27078901	.	C	T	30	PASS	EFF=synonymous_variant(LOW|SILENT|ggC/ggT|p.Gly82Gly/c.246C>T|290|CG14257|protein_coding|CODING|FBtr0331702|2|1),synonymous_variant(LOW|SILENT|ggC/ggT|p.Gly82Gly/c.246C>T|547|CG14257|protein_coding|CODING|FBtr0299564|2|1)
X	732014	.	T	C	30	PASS	EFF=intron_variant(MODIFIER|||c.1355+828T>C|2224|sdk|protein_coding|CODING|FBtr0070130|6|1|WARNING_TRANSCRIPT_INCOMPLETE),intron_variant(MODIFIER|||c.1355+828T>C|2232|sdk|protein_coding|CODING|FBtr0070131|6|1|WARNING_TRANSCRIPT_INCOMPLETE),intron_variant(MODIFIER|||c.1355+828T>C|2224|sdk|protein_coding|CODING|FBtr0070132|6|1|WARNING_TRANSCRIPT_INCOMPLETE),intron_variant(MODIFIER|||c.1355+828T>C|2…
X	1015120	.	A	C	30	PASS	EFF=intron_variant(MODIFIER|||c.-1133+980A>C|748|su_w[a]_|protein_coding|CODING|FBtr0302884|2|1),intron_variant(MODIFIER|||c.991+20T>G|387|CG11638|protein_coding|CODING|FBtr0070183|4|1)
X	1669869	.	G	A	30	PASS	EFF=5_prime_UTR_variant(MODIFIER||51|c.-51G>A|611|hfw|protein_coding|CODING|FBtr0333115|1|1),5_prime_UTR_variant(MODIFIER||51|c.-51G>A|611|hfw|protein_coding|CODING|FBtr0070270|1|1),upstream_gene_variant(MODIFIER||572||140|CG3740|protein_coding|CODING|FBtr0070283||1)
X	1682833	.	G	T	30	PASS	EFF=5_prime_UTR_variant(MODIFIER||837|c.-783G>T|221|CG14797|protein_coding|CODING|FBtr0308320|1|1),upstream_gene_variant(MODIFIER||414||196|CG14797|protein_coding|CODING|FBtr0273400||1),intron_variant(MODIFIER|||c.1474+264C>A|1193|CG32809|protein_coding|CODING|FBtr0333120|10|1),intron_variant(MODIFIER|||c.1474+264C>A|1214|CG32809|protein_coding|CODING|FBtr0333119|10|1),intron_variant(MODIFIER|||c…
X	1842454	.	C	T	30	PASS	EFF=upstream_gene_variant(MODIFIER||174||761|CG42666|protein_coding|CODING|FBtr0302656||1),upstream_gene_variant(MODIFIER||174||761|CG42666|protein_coding|CODING|FBtr0302659||1),upstream_gene_variant(MODIFIER||174||742|CG42666|protein_coding|CODING|FBtr0332901||1),upstream_gene_variant(MODIFIER||892||761|CG42666|protein_coding|CODING|FBtr0302657||1),intron_variant(MODIFIER|||c.-8-1238C>T|742|CG42…
X	2069311	.	A	G	30	PASS	EFF=synonymous_variant(LOW|SILENT|ctA/ctG|p.Leu235Leu/c.705A>G|264|CG4194|protein_coding|CODING|FBtr0070328|1|1),intron_variant(MODIFIER|||c.-56-888T>C|552|CG4199|protein_coding|CODING|FBtr0070337|1|1),intron_variant(MODIFIER|||c.68-888T>C|593|CG4199|protein_coding|CODING|FBtr0070334|2|1),intron_variant(MODIFIER|||c.68-888T>C|593|CG4199|protein_coding|CODING|FBtr0070335|1|1),intron_variant(MODIFI…
X	2078081	.	C	A	30	PASS	EFF=3_prime_UTR_variant(MODIFIER||8|c.*8C>A|246|CG4025|protein_coding|CODING|FBtr0070375|4|1),downstream_gene_variant(MODIFIER||262||560|CG16903|protein_coding|CODING|FBtr0070434||1)
X	2334513	.	T	G	30	PASS	EFF=5_prime_UTR_variant(MODIFIER||2374|c.-1194A>C|107|Ilp6|protein_coding|CODING|FBtr0070406|1|1),intron_variant(MODIFIER|||c.-895-5478T>G|739|phl|protein_coding|CODING|FBtr0344007|2|1)
X	2590098	.	C	G	30	PASS	EFF=intron_variant(MODIFIER|||c.-490+592C>G|457|egh|protein_coding|CODING|FBtr0070439|1|1)
X	2739422	.	G	A	30	PASS	EFF=synonymous_variant(LOW|SILENT|Ctg/Ttg|p.Leu269Leu/c.805C>T|333|Syx4|protein_coding|CODING|FBtr0070494|6|1),synonymous_variant(LOW|SILENT|Ctg/Ttg|p.Leu193Leu/c.577C>T|257|Syx4|protein_coding|CODING|FBtr0332496|6|1),upstream_gene_variant(MODIFIER||884||982|crm|protein_coding|CODING|FBtr0070496||1),upstream_gene_variant(MODIFIER||649||982|crm|protein_coding|CODING|FBtr0070495||1),upstream_gene_v…
X	13781985	.	C	A	30	PASS	EFF=5_prime_UTR_premature_start_codon_gain_variant(LOW||||340|CtsB1|protein_coding|CODING|FBtr0346091|1|1),5_prime_UTR_premature_start_codon_gain_variant(LOW||||340|CtsB1|protein_coding|CODING|FBtr0073838|1|1),5_prime_UTR_variant(MODIFIER||56|c.-56G>T|340|CtsB1|protein_coding|CODING|FBtr0346091|1|1),5_prime_UTR_variant(MODIFIER||56|c.-56G>T|340|CtsB1|protein_coding|CODING|FBtr0073838|1|1),upstrea…
X	18886055	.	G	A	30	PASS	EFF=synonymous_variant(LOW|SILENT|caG/caA|p.Gln176Gln/c.528G>A|560|CG7332|protein_coding|CODING|FBtr0074647|3|1),synonymous_variant(LOW|SILENT|caG/caA|p.Gln176Gln/c.528G>A|560|CG7332|protein_coding|CODING|FBtr0342877|3|1)
dmel_mitochondrion_genome	10681	.	C	T	30	PASS	EFF=synonymous_variant(LOW|SILENT|Cta/Tta|p.Leu62Leu/c.184C>T|379|mt:Cyt-b|protein_coding|CODING|FBtr0100884|1|1|WARNING_TRANSCRIPT_MULTIPLE_STOP_CODONS),upstream_gene_variant(MODIFIER||847||96|mt:ND4L|protein_coding|CODING|FBtr0100880||1|WARNING_TRANSCRIPT_MULTIPLE_STOP_CODONS),upstream_gene_variant(MODIFIER||718|||mt:tRNA:P||NON_CODING|FBtr0100882||1),upstream_gene_variant(MODIFIER||956|||mt:tR…
dmel_mitochondrion_genome	12131	.	T	C	30	PASS	EFF=synonymous_variant(LOW|SILENT|atA/atG|p.Met176Met/c.528A>G|312|mt:ND1|protein_coding|CODING|FBtr0100886|1|1|WARNING_TRANSCRIPT_MULTIPLE_STOP_CODONS),downstream_gene_variant(MODIFIER||494||379|mt:Cyt-b|protein_coding|CODING|FBtr0100884||1|WARNING_TRANSCRIPT_MULTIPLE_STOP_CODONS),downstream_gene_variant(MODIFIER||538|||mt:tRNA:L:CUN||NON_CODING|FBtr0100887||1),downstream_gene_variant(MODIFIER||…
dmel_mitochondrion_genome	12344	.	A	C	30	PASS	EFF=synonymous_variant(LOW|SILENT|ggT/ggG|p.Gly105Gly/c.315T>G|312|mt:ND1|protein_coding|CODING|FBtr0100886|1|1|WARNING_TRANSCRIPT_MULTIPLE_STOP_CODONS),downstream_gene_variant(MODIFIER||707||379|mt:Cyt-b|protein_coding|CODING|FBtr0100884||1|WARNING_TRANSCRIPT_MULTIPLE_STOP_CODONS),downstream_gene_variant(MODIFIER||325|||mt:tRNA:L:CUN||NON_CODING|FBtr0100887||1),downstream_gene_variant(MODIFIER||…
dmel_mitochondrion_genome	3583	.	C	T	30	PASS	EFF=synonymous_variant(LOW||gcT/gcT|p.Ala167Ala/c.501C>T|228|mt:CoII|protein_coding|CODING|FBtr0100863|1|1|WARNING_TRANSCRIPT_INCOMPLETE+WARNING_REF_DOES_NOT_MATCH_GENOME),upstream_gene_variant(MODIFIER||185|||mt:tRNA:K||NON_CODING|FBtr0100864||1),upstream_gene_variant(MODIFIER||257|||mt:tRNA:D||NON_CODING|FBtr0100865||1),upstream_gene_variant(MODIFIER||324||54|mt:ATPase8|protein_coding|CODING|FB…
dmel_mitochondrion_genome	4247	.	T	C	30	PASS	EFF=synonymous_variant(LOW|SILENT|ggA/ggC|p.Gly62Gly/c.186T>C|225|mt:ATPase6|protein_coding|CODING|FBtr0100867|1|1|WARNING_TRANSCRIPT_MULTIPLE_STOP_CODONS+WARNING_REF_DOES_NOT_MATCH_GENOME),upstream_gene_variant(MODIFIER||489||263|mt:CoIII|protein_coding|CODING|FBtr0100868||1|WARNING_TRANSCRIPT_MULTIPLE_STOP_CODONS),downstream_gene_variant(MODIFIER||477||228|mt:CoII|protein_coding|CODING|FBtr0100…
dmel_mitochondrion_genome	5396	.	T	C	30	PASS	EFF=synonymous_variant(LOW|SILENT|Tta/Cta|p.Leu221Leu/c.661T>C|263|mt:CoIII|protein_coding|CODING|FBtr0100868|1|1|WARNING_TRANSCRIPT_MULTIPLE_STOP_CODONS),upstream_gene_variant(MODIFIER||147|||mt:tRNA:G||NON_CODING|FBtr0100869||1),upstream_gene_variant(MODIFIER||212||118|mt:ND3|protein_coding|CODING|FBtr0100870||1|WARNING_TRANSCRIPT_MULTIPLE_STOP_CODONS),upstream_gene_variant(MODIFIER||585|||mt:t…
dmel_mitochondrion_genome	8875	.	G	A	30	PASS	EFF=synonymous_variant(LOW|SILENT|Cta/Tta|p.Leu224Leu/c.670C>T|445|mt:ND4|protein_coding|CODING|FBtr0100879|1|1|WARNING_TRANSCRIPT_INCOMPLETE),upstream_gene_variant(MODIFIER||751||573|mt:ND5|protein_coding|CODING|FBtr0100877||1|WARNING_TRANSCRIPT_INCOMPLETE),upstream_gene_variant(MODIFIER||670|||mt:tRNA:H||NON_CODING|FBtr0100878||1),upstream_gene_variant(MODIFIER||962|||mt:tRNA:T||NON_CODING|FBtr…

## Sheet: MB_C2.13 SNPEff candidate SNPs
##SnpEffVersion="4.0e (build 2014-09-13), by Pablo Cingolani"
##SnpEffCmd="SnpEff dm6.01 /Users/pgriffin/Documents/Drosophila Selection Experiment/snp_and_gene_lists/C2_fet_drift_sig_SNPs_150821.vcf "
##INFO=<ID=EFF,Number=.,Type=String,Description="Predicted effects for this variant.Format: 'Effect ( Effect_Impact | Functional_Class | Codon_Change | Amino_Acid_Change| Amino_Acid_length | Gene_Name | Transcript_BioType | Gene_Coding | Transcript_ID | Exon_Rank | Genotype_Number [ | ERRORS | WARNINGS ] )' ">
##INFO=<ID=LOF,Number=.,Type=String,Description="Predicted loss of function effects for this variant. Format: 'Gene_Name | Gene_ID | Number_of_transcripts_in_gene | Percent_of_transcripts_affected' ">
##INFO=<ID=NMD,Number=.,Type=String,Description="Predicted nonsense mediated decay effects for this variant. Format: 'Gene_Name | Gene_ID | Number_of_transcripts_in_gene | Percent_of_transcripts_affected' ">
#CHROM	POS	ID	REF	ALT	QUAL	FILTER	INFO
2L	656022	.	C	A	30	PASS	EFF=intron_variant(MODIFIER|||c.2570-156G>T|3556|ds|protein_coding|CODING|FBtr0078045|3|1),intron_variant(MODIFIER|||c.2570-156G>T|3556|ds|protein_coding|CODING|FBtr0343249|3|1)
2L	3437124	.	G	A	30	PASS	EFF=intergenic_region(MODIFIER||||||||||1)
2L	3665407	.	G	A	30	PASS	EFF=intron_variant(MODIFIER|||c.-28+2101G>A|587|CG34340|protein_coding|CODING|FBtr0302391|1|1),intron_variant(MODIFIER|||c.-28+2101G>A|587|CG34340|protein_coding|CODING|FBtr0339572|1|1)
2L	3665408	.	T	C	30	PASS	EFF=intron_variant(MODIFIER|||c.-28+2102T>C|587|CG34340|protein_coding|CODING|FBtr0302391|1|1),intron_variant(MODIFIER|||c.-28+2102T>C|587|CG34340|protein_coding|CODING|FBtr0339572|1|1)
2L	3794624	.	G	A	30	PASS	EFF=synonymous_variant(LOW|SILENT|gcG/gcA|p.Ala818Ala/c.2454G>A|3115|CG3921|protein_coding|CODING|FBtr0077496|4|1),synonymous_variant(LOW|SILENT|gcG/gcA|p.Ala818Ala/c.2454G>A|3123|CG3921|protein_coding|CODING|FBtr0307051|4|1),synonymous_variant(LOW|SILENT|gcG/gcA|p.Ala818Ala/c.2454G>A|3123|CG3921|protein_coding|CODING|FBtr0307052|4|1)
2L	3811546	.	C	T	30	PASS	EFF=downstream_gene_variant(MODIFIER||875||351|Reph|protein_coding|CODING|FBtr0077497||1),intron_variant(MODIFIER|||c.1633+25G>A|714|CG3407|protein_coding|CODING|FBtr0077515|3|1)
2L	3811557	.	A	G	30	PASS	EFF=downstream_gene_variant(MODIFIER||886||351|Reph|protein_coding|CODING|FBtr0077497||1),intron_variant(MODIFIER|||c.1633+14T>C|714|CG3407|protein_coding|CODING|FBtr0077515|3|1)
2L	5073916	.	T	C	30	PASS	EFF=synonymous_variant(LOW|SILENT|ctA/ctG|p.Leu620Leu/c.1860A>G|630|pgant5|protein_coding|CODING|FBtr0111024|9|1),synonymous_variant(LOW|SILENT|ctA/ctG|p.Leu620Leu/c.1860A>G|630|pgant5|protein_coding|CODING|FBtr0079026|10|1)
2L	7461087	.	A	C	30	PASS	EFF=upstream_gene_variant(MODIFIER||445||443|Gr28b|protein_coding|CODING|FBtr0079459||1),intron_variant(MODIFIER|||c.669+492T>G|452|Gr28b|protein_coding|CODING|FBtr0079458|1|1)
2L	8928568	.	G	T	30	PASS	EFF=synonymous_variant(LOW||cgT/cgT|p.Arg1141Arg/c.3423G>T|1784|CG34398|protein_coding|CODING|FBtr0303890|8|1|WARNING_REF_DOES_NOT_MATCH_GENOME),synonymous_variant(LOW||cgT/cgT|p.Arg1141Arg/c.3423G>T|1784|CG34398|protein_coding|CODING|FBtr0303889|8|1|WARNING_REF_DOES_NOT_MATCH_GENOME),synonymous_variant(LOW||cgT/cgT|p.Arg968Arg/c.2904G>T|1757|CG34398|protein_coding|CODING|FBtr0340260|7|1|WARNING_…
2L	10216391	.	G	A	30	PASS	EFF=synonymous_variant(LOW||ccT/ccT|p.Pro527Pro/c.1581C>T|1287|Npc1a|protein_coding|CODING|FBtr0303906|10|1|WARNING_REF_DOES_NOT_MATCH_GENOME),synonymous_variant(LOW||ccT/ccT|p.Pro527Pro/c.1581C>T|1287|Npc1a|protein_coding|CODING|FBtr0303905|10|1|WARNING_REF_DOES_NOT_MATCH_GENOME),synonymous_variant(LOW||ccT/ccT|p.Pro523Pro/c.1569C>T|1283|Npc1a|protein_coding|CODING|FBtr0343609|10|1|WARNING_REF_D…
2L	10394114	.	A	T	30	PASS	EFF=missense_variant(MODERATE|MISSENSE|gaT/gaA|p.Asp278Glu/c.834T>A|337|Mdh1|protein_coding|CODING|FBtr0345435|2|1),missense_variant(MODERATE|MISSENSE|gaT/gaA|p.Asp278Glu/c.834T>A|337|Mdh1|protein_coding|CODING|FBtr0080050|2|1),downstream_gene_variant(MODIFIER||886||710|da|protein_coding|CODING|FBtr0332195||1)
2L	11945051	.	A	C	30	PASS	EFF=synonymous_variant(LOW|SILENT|ccA/ccC|p.Pro25Pro/c.75A>C|477|Cry|protein_coding|CODING|FBtr0080281|2|1),synonymous_variant(LOW|SILENT|ccA/ccC|p.Pro25Pro/c.75A>C|477|Cry|protein_coding|CODING|FBtr0342578|2|1)
2L	13428661	.	G	C	30	PASS	EFF=intron_variant(MODIFIER|||c.-1614+5316G>C|984|CG42784|protein_coding|CODING|FBtr0308949|2|1)
2L	16836699	.	T	A	30	PASS	EFF=synonymous_variant(LOW||Tat/Tat|p.Tyr174Tyr/c.520A>T|652|CG13283|protein_coding|CODING|FBtr0080928|1|1|WARNING_REF_DOES_NOT_MATCH_GENOME)
2L	20406321	.	A	G	30	PASS	EFF=intron_variant(MODIFIER|||c.-62+8013T>C|404|CG10947|protein_coding|CODING|FBtr0336750|1|1)
2R	5108523	.	A	T	30	PASS	EFF=intergenic_region(MODIFIER||||||||||1)
2R	5108632	.	G	T	30	PASS	EFF=intergenic_region(MODIFIER||||||||||1)
2R	6530917	.	G	A	30	PASS	EFF=intron_variant(MODIFIER|||c.650+27229G>A|1744|jing|protein_coding|CODING|FBtr0114365|1|1)
2R	7700595	.	C	T	30	PASS	EFF=synonymous_variant(LOW|SILENT|ttC/ttT|p.Phe318Phe/c.954C>T|635|CG30496|protein_coding|CODING|FBtr0088926|1|1),intron_variant(MODIFIER|||c.61+1208C>T|326|CG30493|protein_coding|CODING|FBtr0088925|1|1)
2R	9394098	.	C	T	30	PASS	EFF=synonymous_variant(LOW|SILENT|aaC/aaT|p.Asn1049Asn/c.3147C>T|1374|l_2_03659|protein_coding|CODING|FBtr0302504|8|1),synonymous_variant(LOW|SILENT|aaC/aaT|p.Asn1049Asn/c.3147C>T|1374|l_2_03659|protein_coding|CODING|FBtr0332999|9|1)
2R	9550837	.	T	G	30	PASS	EFF=intergenic_region(MODIFIER||||||||||1)
2R	16229065	.	T	C	30	PASS	EFF=synonymous_variant(LOW||tgC/tgC|p.Cys477Cys/c.1431T>C|714|Tsf3|protein_coding|CODING|FBtr0087130|4|1|WARNING_REF_DOES_NOT_MATCH_GENOME),intron_variant(MODIFIER|||c.-159+1013A>G|539|CG15706|protein_coding|CODING|FBtr0087191|1|1),intron_variant(MODIFIER|||c.-277+1013A>G|539|CG15706|protein_coding|CODING|FBtr0344079|1|1),intron_variant(MODIFIER|||c.-396+1013A>G|539|CG15706|protein_coding|CODING|…
2R	21284819	.	A	G	30	PASS	EFF=downstream_gene_variant(MODIFIER||429||1312|CG10505|protein_coding|CODING|FBtr0071619||1),intron_variant(MODIFIER|||c.1215+21A>G|528|MFS16|protein_coding|CODING|FBtr0071589|6|1),intron_variant(MODIFIER|||c.1329+21A>G|566|MFS16|protein_coding|CODING|FBtr0071590|6|1),intron_variant(MODIFIER|||c.1215+21A>G|528|MFS16|protein_coding|CODING|FBtr0071591|6|1),intron_variant(MODIFIER|||c.1215+21A>G|52…
2R	21537154	.	A	T	30	PASS	EFF=synonymous_variant(LOW|SILENT|acT/acA|p.Thr227Thr/c.681T>A|284|CG30287|protein_coding|CODING|FBtr0071695|4|1),upstream_gene_variant(MODIFIER||359||277|CG30286|protein_coding|CODING|FBtr0300951||1),upstream_gene_variant(MODIFIER||359||152|CG30286|protein_coding|CODING|FBtr0300952||1),intron_variant(MODIFIER|||c.154+13912A>T|1377|Egfr|protein_coding|CODING|FBtr0071653|1|1)
2R	21896957	.	G	T	30	PASS	EFF=intron_variant(MODIFIER|||c.-195+24263G>T|738|Fili|protein_coding|CODING|FBtr0112593|1|1),intron_variant(MODIFIER|||c.-260+5611G>T|738|Fili|protein_coding|CODING|FBtr0330338|2|1)
2R	21916365	.	C	T	30	PASS	EFF=intron_variant(MODIFIER|||c.-194-5152C>T|738|Fili|protein_coding|CODING|FBtr0112593|1|1),intron_variant(MODIFIER|||c.-194-5152C>T|738|Fili|protein_coding|CODING|FBtr0330338|3|1)
2R	22061985	.	G	T	30	PASS	EFF=upstream_gene_variant(MODIFIER||468||393|CG13501|protein_coding|CODING|FBtr0345871||1),intron_variant(MODIFIER|||c.-152+725G>T|223|Snp|protein_coding|CODING|FBtr0339100|1|1),intron_variant(MODIFIER|||c.23+404G>T|281|Snp|protein_coding|CODING|FBtr0339099|1|1)
2R	22072958	.	C	A	30	PASS	EFF=splice_region_variant(LOW|||c.196G>T|436|CG11474|protein_coding|CODING|FBtr0071802|2|1),splice_region_variant(LOW|||c.196G>T|436|CG11474|protein_coding|CODING|FBtr0303766|2|1),downstream_gene_variant(MODIFIER||580||478|CG2921|protein_coding|CODING|FBtr0071800||1),intron_variant(MODIFIER|||c.195+4G>T|436|CG11474|protein_coding|CODING|FBtr0071802|2|1),intron_variant(MODIFIER|||c.195+4G>T|436|CG…
2R	22072959	.	C	A	30	PASS	EFF=splice_region_variant(LOW|||c.196G>T|436|CG11474|protein_coding|CODING|FBtr0071802|2|1),splice_region_variant(LOW|||c.196G>T|436|CG11474|protein_coding|CODING|FBtr0303766|2|1),downstream_gene_variant(MODIFIER||579||478|CG2921|protein_coding|CODING|FBtr0071800||1),intron_variant(MODIFIER|||c.195+3G>T|436|CG11474|protein_coding|CODING|FBtr0071802|2|1),intron_variant(MODIFIER|||c.195+3G>T|436|CG…
2R	22123421	.	G	T	30	PASS	EFF=missense_variant(MODERATE|MISSENSE|Gtg/Ttg|p.Val142Leu/c.424G>T|401|mei-S332|protein_coding|CODING|FBtr0071761|2|1),missense_variant(MODERATE|MISSENSE|Gtg/Ttg|p.Val142Leu/c.424G>T|401|mei-S332|protein_coding|CODING|FBtr0342979|1|1),upstream_gene_variant(MODIFIER||859||751|Vrp1|protein_coding|CODING|FBtr0071791||1),upstream_gene_variant(MODIFIER||859||751|Vrp1|protein_coding|CODING|FBtr0071793…
2R	22155353	.	G	A	30	PASS	EFF=intron_variant(MODIFIER|||c.-15-7552G>A|1087|a|protein_coding|CODING|FBtr0342981|2|1),intron_variant(MODIFIER|||c.-16+3658G>A|1329|a|protein_coding|CODING|FBtr0071763|3|1),intron_variant(MODIFIER|||c.-16+3658G>A|1329|a|protein_coding|CODING|FBtr0071764|2|1),intron_variant(MODIFIER|||c.-16+3658G>A|1329|a|protein_coding|CODING|FBtr0100521|3|1)
2R	22187936	.	A	T	30	PASS	EFF=synonymous_variant(LOW|SILENT|atA/atT|p.Ile416Ile/c.1248A>T|803|Vps35|protein_coding|CODING|FBtr0071772|5|1),synonymous_variant(LOW|SILENT|atA/atT|p.Ile435Ile/c.1305A>T|822|Vps35|protein_coding|CODING|FBtr0071771|5|1)
2R	22318368	.	T	C	30	PASS	EFF=5_prime_UTR_variant(MODIFIER||6826|c.-279T>C|1044|Gp150|protein_coding|CODING|FBtr0342985|1|1),downstream_gene_variant(MODIFIER||627|||CR44756||NON_CODING|FBtr0342994||1),intron_variant(MODIFIER|||c.-20+414T>C|1051|Gp150|protein_coding|CODING|FBtr0071813|2|1),intron_variant(MODIFIER|||c.-20+414T>C|1051|Gp150|protein_coding|CODING|FBtr0071814|2|1),intron_variant(MODIFIER|||c.-20+414T>C|1051|Gp…
2R	22338704	.	A	G	30	PASS	EFF=intron_variant(MODIFIER|||c.2483+97T>C|1023|Liprin-gamma|protein_coding|CODING|FBtr0071846|11|1),intron_variant(MODIFIER|||c.2483+97T>C|1023|Liprin-gamma|protein_coding|CODING|FBtr0071847|10|1),intron_variant(MODIFIER|||c.2870+97T>C|1152|Liprin-gamma|protein_coding|CODING|FBtr0113106|11|1),intron_variant(MODIFIER|||c.2660+97T>C|1082|Liprin-gamma|protein_coding|CODING|FBtr0342990|11|1),intron_…
2R	22342899	.	C	G	30	PASS	EFF=intron_variant(MODIFIER|||c.695-1304G>C|1082|Liprin-gamma|protein_coding|CODING|FBtr0342990|5|1),intron_variant(MODIFIER|||c.308-169G>C|1023|Liprin-gamma|protein_coding|CODING|FBtr0071846|4|1),intron_variant(MODIFIER|||c.308-169G>C|1023|Liprin-gamma|protein_coding|CODING|FBtr0071847|3|1),intron_variant(MODIFIER|||c.695-169G>C|1152|Liprin-gamma|protein_coding|CODING|FBtr0113106|4|1),intron_var…
2R	22489124	.	A	G	30	PASS	EFF=synonymous_variant(LOW|SILENT|caA/caG|p.Gln1839Gln/c.5517A>G|2733|CG4554|protein_coding|CODING|FBtr0071833|4|1)
2R	22599845	.	C	T	30	PASS	EFF=downstream_gene_variant(MODIFIER||560||1333|CG4294|protein_coding|CODING|FBtr0300409||1),downstream_gene_variant(MODIFIER||951||1331|CG4294|protein_coding|CODING|FBtr0308603||1),intron_variant(MODIFIER|||c.1-66C>T|98|CG4269|protein_coding|CODING|FBtr0343000|1|1),intron_variant(MODIFIER|||c.13-66C>T|102|CG4269|protein_coding|CODING|FBtr0071854|1|1),intron_variant(MODIFIER|||c.13-66C>T|102|CG42…
2R	22614277	.	G	C	30	PASS	EFF=upstream_gene_variant(MODIFIER||51||502|CG33143|protein_coding|CODING|FBtr0071858||1),upstream_gene_variant(MODIFIER||51||539|CG33143|protein_coding|CODING|FBtr0343008||1),upstream_gene_variant(MODIFIER||51||516|CG33143|protein_coding|CODING|FBtr0343009||1),upstream_gene_variant(MODIFIER||51||757|CG33143|protein_coding|CODING|FBtr0343010||1),upstream_gene_variant(MODIFIER||901||1171|CG4329|pr…
2R	22642889	.	C	T	30	PASS	EFF=synonymous_variant(LOW|SILENT|aaG/aaA|p.Lys217Lys/c.651G>A|529|Ugt58Fa|protein_coding|CODING|FBtr0345505|4|1),synonymous_variant(LOW|SILENT|aaG/aaA|p.Lys217Lys/c.651G>A|529|Ugt58Fa|protein_coding|CODING|FBtr0071934|4|1)
2R	22643018	.	G	A	30	PASS	EFF=synonymous_variant(LOW|SILENT|aaC/aaT|p.Asn174Asn/c.522C>T|529|Ugt58Fa|protein_coding|CODING|FBtr0345505|4|1),synonymous_variant(LOW|SILENT|aaC/aaT|p.Asn174Asn/c.522C>T|529|Ugt58Fa|protein_coding|CODING|FBtr0071934|4|1)
2R	22643719	.	G	A	30	PASS	EFF=downstream_gene_variant(MODIFIER||927||205|CG2852|protein_coding|CODING|FBtr0345504||1),intron_variant(MODIFIER|||c.4-66C>T|529|Ugt58Fa|protein_coding|CODING|FBtr0071934|1|1),intron_variant(MODIFIER|||c.4-66C>T|529|Ugt58Fa|protein_coding|CODING|FBtr0345505|1|1)
2R	22646310	.	G	A	30	PASS	EFF=5_prime_UTR_variant(MODIFIER||39|c.-39C>T|205|CG2852|protein_coding|CODING|FBtr0345504|1|1),5_prime_UTR_variant(MODIFIER||39|c.-39C>T|205|CG2852|protein_coding|CODING|FBtr0071933|1|1),downstream_gene_variant(MODIFIER||306||153|CG30195|protein_coding|CODING|FBtr0071931||1)
2R	22646313	.	A	T	30	PASS	EFF=5_prime_UTR_variant(MODIFIER||42|c.-42T>A|205|CG2852|protein_coding|CODING|FBtr0345504|1|1),5_prime_UTR_variant(MODIFIER||42|c.-42T>A|205|CG2852|protein_coding|CODING|FBtr0071933|1|1),downstream_gene_variant(MODIFIER||303||153|CG30195|protein_coding|CODING|FBtr0071931||1)
2R	22646404	.	G	T	30	PASS	EFF=upstream_gene_variant(MODIFIER||60||205|CG2852|protein_coding|CODING|FBtr0071933||1),upstream_gene_variant(MODIFIER||60||205|CG2852|protein_coding|CODING|FBtr0345504||1),downstream_gene_variant(MODIFIER||212||153|CG30195|protein_coding|CODING|FBtr0071931||1),intergenic_region(MODIFIER||||||||||1)
2R	22646423	.	A	G	30	PASS	EFF=upstream_gene_variant(MODIFIER||79||205|CG2852|protein_coding|CODING|FBtr0071933||1),upstream_gene_variant(MODIFIER||79||205|CG2852|protein_coding|CODING|FBtr0345504||1),downstream_gene_variant(MODIFIER||193||153|CG30195|protein_coding|CODING|FBtr0071931||1),intergenic_region(MODIFIER||||||||||1)
2R	22646448	.	T	C	30	PASS	EFF=upstream_gene_variant(MODIFIER||104||205|CG2852|protein_coding|CODING|FBtr0071933||1),upstream_gene_variant(MODIFIER||104||205|CG2852|protein_coding|CODING|FBtr0345504||1),downstream_gene_variant(MODIFIER||168||153|CG30195|protein_coding|CODING|FBtr0071931||1),intergenic_region(MODIFIER||||||||||1)
2R	22727681	.	C	G	30	PASS	EFF=5_prime_UTR_variant(MODIFIER||2162|c.-141G>C|410|jbug|protein_coding|CODING|FBtr0302117|2|1|WARNING_REF_DOES_NOT_MATCH_GENOME),5_prime_UTR_variant(MODIFIER||2162|c.-141G>C|410|jbug|protein_coding|CODING|FBtr0301376|2|1|WARNING_REF_DOES_NOT_MATCH_GENOME),5_prime_UTR_variant(MODIFIER||2162|c.-141G>C|1752|jbug|protein_coding|CODING|FBtr0301377|2|1|WARNING_REF_DOES_NOT_MATCH_GENOME),5_prime_UTR_v…
2R	22921601	.	G	T	30	PASS	EFF=missense_variant(MODERATE|MISSENSE|Ccg/Acg|p.Pro925Thr/c.2773C>A|1711|Nup214|protein_coding|CODING|FBtr0071996|6|1)
2R	24008231	.	C	T	30	PASS	EFF=intron_variant(MODIFIER|||c.2777-86G>A|4218|Unc-89|protein_coding|CODING|FBtr0113464|7|1),intron_variant(MODIFIER|||c.2780-86G>A|4194|Unc-89|protein_coding|CODING|FBtr0343283|7|1),intron_variant(MODIFIER|||c.2777-86G>A|4193|Unc-89|protein_coding|CODING|FBtr0343284|7|1),intron_variant(MODIFIER|||c.2018-86G>A|3965|Unc-89|protein_coding|CODING|FBtr0343285|3|1),intron_variant(MODIFIER|||c.53-86G>…
2R	24064338	.	C	T	30	PASS	EFF=upstream_gene_variant(MODIFIER||139||116|Rap2l|protein_coding|CODING|FBtr0343335||1),intron_variant(MODIFIER|||c.136-396C>T|182|Rap2l|protein_coding|CODING|FBtr0072177|1|1),intron_variant(MODIFIER|||c.-64+109C>T|116|Rap2l|protein_coding|CODING|FBtr0343334|1|1)
2R	24765953	.	G	A	30	PASS	EFF=synonymous_variant(LOW|SILENT|ctG/ctA|p.Leu241Leu/c.723G>A|322|CG3894|protein_coding|CODING|FBtr0300130|3|1),downstream_gene_variant(MODIFIER||765||223|GstE12|protein_coding|CODING|FBtr0072436||1),downstream_gene_variant(MODIFIER||765||223|GstE12|protein_coding|CODING|FBtr0305309||1),downstream_gene_variant(MODIFIER||791||223|GstE12|protein_coding|CODING|FBtr0305310||1),downstream_gene_varian…
3L	748201	.	T	C	30	PASS	EFF=intron_variant(MODIFIER|||c.40+7175A>G|302|hng3|protein_coding|CODING|FBtr0331769|1|1)
3L	828207	.	G	A	30	PASS	EFF=synonymous_variant(LOW|SILENT|Cta/Tta|p.Leu1119Leu/c.3355C>T|1227|CG13900|protein_coding|CODING|FBtr0072597|7|1),3_prime_UTR_variant(MODIFIER||2514|c.*2052C>T|469|CG13900|protein_coding|CODING|FBtr0331404|8|1),upstream_gene_variant(MODIFIER||824|||snoRNA:Me28S-C788a||NON_CODING|FBtr0114339||1),upstream_gene_variant(MODIFIER||587|||snoRNA:Me28S-G3113b||NON_CODING|FBtr0114340||1),upstream_gene_…
3L	828828	.	G	T	30	PASS	EFF=synonymous_variant(LOW|SILENT|Cgg/Agg|p.Arg912Arg/c.2734C>A|1227|CG13900|protein_coding|CODING|FBtr0072597|7|1),3_prime_UTR_variant(MODIFIER||1893|c.*1431C>A|469|CG13900|protein_coding|CODING|FBtr0331404|8|1),upstream_gene_variant(MODIFIER||985|||snoRNA:Me28S-G3113a||NON_CODING|FBtr0114341||1),non_coding_exon_variant(MODIFIER|||n.1181C>A||CR45184||NON_CODING|FBtr0345083|2|1),non_coding_exon_v…
3L	829111	.	T	A	30	PASS	EFF=synonymous_variant(LOW|SILENT|acA/acT|p.Thr817Thr/c.2451A>T|1227|CG13900|protein_coding|CODING|FBtr0072597|7|1),3_prime_UTR_variant(MODIFIER||1610|c.*1148A>T|469|CG13900|protein_coding|CODING|FBtr0331404|8|1),downstream_gene_variant(MODIFIER||811|||snoRNA:Me5.8S-G74||NON_CODING|FBtr0114342||1),non_coding_exon_variant(MODIFIER|||n.898A>T||CR45184||NON_CODING|FBtr0345083|2|1),non_coding_exon_va…
3L	829150	.	T	G	30	PASS	EFF=synonymous_variant(LOW|SILENT|ggA/ggC|p.Gly804Gly/c.2412A>C|1227|CG13900|protein_coding|CODING|FBtr0072597|7|1),3_prime_UTR_variant(MODIFIER||1571|c.*1109A>C|469|CG13900|protein_coding|CODING|FBtr0331404|8|1),downstream_gene_variant(MODIFIER||772|||snoRNA:Me5.8S-G74||NON_CODING|FBtr0114342||1),non_coding_exon_variant(MODIFIER|||n.859A>C||CR45184||NON_CODING|FBtr0345083|2|1),non_coding_exon_va…
3L	829174	.	G	A	30	PASS	EFF=synonymous_variant(LOW|SILENT|acC/acT|p.Thr796Thr/c.2388C>T|1227|CG13900|protein_coding|CODING|FBtr0072597|7|1),3_prime_UTR_variant(MODIFIER||1547|c.*1085C>T|469|CG13900|protein_coding|CODING|FBtr0331404|8|1),downstream_gene_variant(MODIFIER||748|||snoRNA:Me5.8S-G74||NON_CODING|FBtr0114342||1),non_coding_exon_variant(MODIFIER|||n.835C>T||CR45184||NON_CODING|FBtr0345083|2|1),non_coding_exon_va…
3L	829180	.	T	C	30	PASS	EFF=synonymous_variant(LOW|SILENT|ccA/ccG|p.Pro794Pro/c.2382A>G|1227|CG13900|protein_coding|CODING|FBtr0072597|7|1),3_prime_UTR_variant(MODIFIER||1541|c.*1079A>G|469|CG13900|protein_coding|CODING|FBtr0331404|8|1),downstream_gene_variant(MODIFIER||742|||snoRNA:Me5.8S-G74||NON_CODING|FBtr0114342||1),non_coding_exon_variant(MODIFIER|||n.829A>G||CR45184||NON_CODING|FBtr0345083|2|1),non_coding_exon_va…
3L	829204	.	T	C	30	PASS	EFF=synonymous_variant(LOW|SILENT|gtA/gtG|p.Val786Val/c.2358A>G|1227|CG13900|protein_coding|CODING|FBtr0072597|7|1),3_prime_UTR_variant(MODIFIER||1517|c.*1055A>G|469|CG13900|protein_coding|CODING|FBtr0331404|8|1),downstream_gene_variant(MODIFIER||718|||snoRNA:Me5.8S-G74||NON_CODING|FBtr0114342||1),non_coding_exon_variant(MODIFIER|||n.805A>G||CR45184||NON_CODING|FBtr0345083|2|1),non_coding_exon_va…
3L	829246	.	C	T	30	PASS	EFF=synonymous_variant(LOW|SILENT|agG/agA|p.Arg772Arg/c.2316G>A|1227|CG13900|protein_coding|CODING|FBtr0072597|7|1),3_prime_UTR_variant(MODIFIER||1475|c.*1013G>A|469|CG13900|protein_coding|CODING|FBtr0331404|8|1),downstream_gene_variant(MODIFIER||676|||snoRNA:Me5.8S-G74||NON_CODING|FBtr0114342||1),non_coding_exon_variant(MODIFIER|||n.763G>A||CR45184||NON_CODING|FBtr0345083|2|1),non_coding_exon_va…
3L	1017602	.	G	T	30	PASS	EFF=intron_variant(MODIFIER|||c.537+960C>A|804|trio|protein_coding|CODING|FBtr0072646|2|1),intron_variant(MODIFIER|||c.4914+6602C>A|2263|trio|protein_coding|CODING|FBtr0072644|6|1),intron_variant(MODIFIER|||c.4914+6602C>A|2263|trio|protein_coding|CODING|FBtr0072645|6|1)
3L	2513675	.	A	T	30	PASS	EFF=intron_variant(MODIFIER|||c.3144+21T>A|2134|Spn|protein_coding|CODING|FBtr0304613|6|1),intron_variant(MODIFIER|||c.3144+21T>A|2134|Spn|protein_coding|CODING|FBtr0304614|6|1),intron_variant(MODIFIER|||c.3144+21T>A|2137|Spn|protein_coding|CODING|FBtr0304615|6|1),intron_variant(MODIFIER|||c.3144+21T>A|1817|Spn|protein_coding|CODING|FBtr0304616|6|1),intron_variant(MODIFIER|||c.3144+21T>A|1684|Spn…
3L	2875863	.	C	G	30	PASS	EFF=intron_variant(MODIFIER|||c.-1041+2670G>C|2860|CG43444|protein_coding|CODING|FBtr0309117|1|1),intron_variant(MODIFIER|||c.-1041+2670G>C|2915|CG43444|protein_coding|CODING|FBtr0309118|1|1),intron_variant(MODIFIER|||c.-1041+2670G>C|2866|CG43444|protein_coding|CODING|FBtr0333880|1|1),intron_variant(MODIFIER|||c.-1041+2670G>C|2921|CG43444|protein_coding|CODING|FBtr0333881|1|1)
3L	3020138	.	G	T	30	PASS	EFF=intergenic_region(MODIFIER||||||||||1)
3L	3334539	.	A	G	30	PASS	EFF=synonymous_variant(LOW||Ctc/Ctc|p.Leu7Leu/c.19T>C|315|CG14969|protein_coding|CODING|FBtr0073082|2|1|WARNING_REF_DOES_NOT_MATCH_GENOME)
3L	3336108	.	C	A	30	PASS	EFF=3_prime_UTR_variant(MODIFIER||36|c.*36G>T|72|Drsl6|protein_coding|CODING|FBtr0073080|1|1),upstream_gene_variant(MODIFIER||320||69|Drsl1|protein_coding|CODING|FBtr0073081||1),upstream_gene_variant(MODIFIER||752||4097|kst|protein_coding|CODING|FBtr0303857||1),upstream_gene_variant(MODIFIER||752||4207|kst|protein_coding|CODING|FBtr0332057||1),upstream_gene_variant(MODIFIER||995||4097|kst|protein…
3L	4103730	.	A	T	30	PASS	EFF=5_prime_UTR_variant(MODIFIER||530|c.-446A>T|708|Fit1|protein_coding|CODING|FBtr0073210|1|1),5_prime_UTR_variant(MODIFIER||530|c.-530A>T|708|Fit1|protein_coding|CODING|FBtr0073209|1|1),upstream_gene_variant(MODIFIER||770||454|CG14995|protein_coding|CODING|FBtr0073271||1),upstream_gene_variant(MODIFIER||474||362|CG14995|protein_coding|CODING|FBtr0302303||1)
3L	4137801	.	C	T	30	PASS	EFF=synonymous_variant(LOW|SILENT|caG/caA|p.Gln338Gln/c.1014G>A|597|Rop|protein_coding|CODING|FBtr0310632|1|1),synonymous_variant(LOW|SILENT|caG/caA|p.Gln338Gln/c.1014G>A|597|Rop|protein_coding|CODING|FBtr0073263|1|1)
3L	4138842	.	G	A	30	PASS	EFF=5_prime_UTR_variant(MODIFIER||28|c.-28C>T|597|Rop|protein_coding|CODING|FBtr0310632|1|1),5_prime_UTR_variant(MODIFIER||28|c.-28C>T|597|Rop|protein_coding|CODING|FBtr0073263|1|1),upstream_gene_variant(MODIFIER||234||192|Ras64B|protein_coding|CODING|FBtr0073212||1)
3L	4162709	.	T	A	30	PASS	EFF=splice_region_variant(LOW|||c.2544A>T|1047|mas|protein_coding|CODING|FBtr0073260|7|1),splice_region_variant(LOW|||c.2541A>T|1046|mas|protein_coding|CODING|FBtr0332659|7|1),intron_variant(MODIFIER|||c.2543+4A>T|1047|mas|protein_coding|CODING|FBtr0073260|7|1),intron_variant(MODIFIER|||c.2540+4A>T|1046|mas|protein_coding|CODING|FBtr0332659|7|1)
3L	4164675	.	G	A	30	PASS	EFF=synonymous_variant(LOW|SILENT|ggC/ggT|p.Gly231Gly/c.693C>T|1046|mas|protein_coding|CODING|FBtr0332659|5|1),synonymous_variant(LOW|SILENT|ggC/ggT|p.Gly232Gly/c.696C>T|1047|mas|protein_coding|CODING|FBtr0073260|5|1)
3L	4172422	.	C	T	30	PASS	EFF=synonymous_variant(LOW|SILENT|ctC/ctT|p.Leu201Leu/c.603C>T|483|Ero1L|protein_coding|CODING|FBtr0073217|3|1)
3L	4174399	.	A	G	30	PASS	EFF=synonymous_variant(LOW|SILENT|ttA/ttG|p.Leu127Leu/c.381A>G|291|CG18675|protein_coding|CODING|FBtr0073218|2|1),downstream_gene_variant(MODIFIER||610||483|Ero1L|protein_coding|CODING|FBtr0073217||1),downstream_gene_variant(MODIFIER||460||524|Teh4|protein_coding|CODING|FBtr0301645||1)
3L	4218217	.	T	A	30	PASS	EFF=synonymous_variant(LOW|SILENT|gcT/gcA|p.Ala2102Ala/c.6306T>A|2554|CG43367|protein_coding|CODING|FBtr0307312|20|1),synonymous_variant(LOW|SILENT|gcT/gcA|p.Ala2302Ala/c.6906T>A|2754|CG43367|protein_coding|CODING|FBtr0307309|22|1),synonymous_variant(LOW|SILENT|gcT/gcA|p.Ala2260Ala/c.6780T>A|2712|CG43367|protein_coding|CODING|FBtr0307310|21|1),synonymous_variant(LOW|SILENT|gcT/gcA|p.Ala2102Ala/c.…
3L	4368873	.	T	C	30	PASS	EFF=3_prime_UTR_variant(MODIFIER||288|c.*288A>G|322|DopEcR|protein_coding|CODING|FBtr0100185|5|1|WARNING_REF_DOES_NOT_MATCH_GENOME),3_prime_UTR_variant(MODIFIER||288|c.*288A>G|322|DopEcR|protein_coding|CODING|FBtr0100186|4|1|WARNING_REF_DOES_NOT_MATCH_GENOME),downstream_gene_variant(MODIFIER||261||322|DopEcR|protein_coding|CODING|FBtr0073337||1)
3L	4499439	.	C	T	30	PASS	EFF=missense_variant(MODERATE|MISSENSE|Gca/Aca|p.Ala334Thr/c.1000G>A|487|CG13720|protein_coding|CODING|FBtr0333588|1|1)
3L	4782117	.	T	C	30	PASS	EFF=intron_variant(MODIFIER|||c.2168-7005T>C|1984|RhoGEF64C|protein_coding|CODING|FBtr0073345|7|1),intron_variant(MODIFIER|||c.2168-7005T>C|1984|RhoGEF64C|protein_coding|CODING|FBtr0332738|6|1)
3L	5563305	.	T	C	30	PASS	EFF=missense_variant(MODERATE|MISSENSE|Aat/Gat|p.Asn48Asp/c.142A>G|416|Sucb|protein_coding|CODING|FBtr0077134|2|1),missense_variant(MODERATE|MISSENSE|Aat/Gat|p.Asn48Asp/c.142A>G|416|Sucb|protein_coding|CODING|FBtr0344756|2|1),upstream_gene_variant(MODIFIER||469||302|Sras|protein_coding|CODING|FBtr0077083||1)
3L	5582083	.	A	G	30	PASS	EFF=intergenic_region(MODIFIER||||||||||1)
3L	5582099	.	T	C	30	PASS	EFF=intergenic_region(MODIFIER||||||||||1)
3L	5582335	.	A	G	30	PASS	EFF=intergenic_region(MODIFIER||||||||||1)
3L	5587096	.	G	A	30	PASS	EFF=synonymous_variant(LOW|SILENT|gaG/gaA|p.Glu1012Glu/c.3036G>A|1929|l_3_psg2|protein_coding|CODING|FBtr0077085|2|1)
3L	5587225	.	T	C	30	PASS	EFF=synonymous_variant(LOW|SILENT|gaT/gaC|p.Asp1055Asp/c.3165T>C|1929|l_3_psg2|protein_coding|CODING|FBtr0077085|2|1)
3L	5588488	.	A	C	30	PASS	EFF=synonymous_variant(LOW||tcC/tcC|p.Ser1476Ser/c.4428A>C|1929|l_3_psg2|protein_coding|CODING|FBtr0077085|2|1|WARNING_REF_DOES_NOT_MATCH_GENOME)
3L	5591403	.	A	G	30	PASS	EFF=synonymous_variant(LOW|SILENT|acT/acC|p.Thr272Thr/c.816T>C|543|spo|protein_coding|CODING|FBtr0077130|1|1),synonymous_variant(LOW|SILENT|acT/acC|p.Thr272Thr/c.816T>C|543|spo|protein_coding|CODING|FBtr0346640|1|1)
3L	5592523	.	T	G	30	PASS	EFF=5_prime_UTR_variant(MODIFIER||305|c.-305A>C|543|spo|protein_coding|CODING|FBtr0346640|1|1),upstream_gene_variant(MODIFIER||254||543|spo|protein_coding|CODING|FBtr0077130||1),downstream_gene_variant(MODIFIER||218||524|CG10592|protein_coding|CODING|FBtr0077129||1)
3L	5592534	.	C	T	30	PASS	EFF=5_prime_UTR_variant(MODIFIER||316|c.-316G>A|543|spo|protein_coding|CODING|FBtr0346640|1|1),upstream_gene_variant(MODIFIER||265||543|spo|protein_coding|CODING|FBtr0077130||1),downstream_gene_variant(MODIFIER||207||524|CG10592|protein_coding|CODING|FBtr0077129||1)
3L	5659192	.	G	T	30	PASS	EFF=downstream_gene_variant(MODIFIER||508||634|Sse|protein_coding|CODING|FBtr0077125||1),intron_variant(MODIFIER|||c.-403-237G>T|2072|sif|protein_coding|CODING|FBtr0330122|1|1),intron_variant(MODIFIER|||c.-403-237G>T|2081|sif|protein_coding|CODING|FBtr0340654|2|1)
3L	5709269	.	G	A	30	PASS	EFF=intron_variant(MODIFIER|||c.2952+2696G>A|2072|sif|protein_coding|CODING|FBtr0112708|17|1),intron_variant(MODIFIER|||c.2892+2696G>A|2052|sif|protein_coding|CODING|FBtr0112709|5|1),intron_variant(MODIFIER|||c.2892+2696G>A|2061|sif|protein_coding|CODING|FBtr0112710|5|1),intron_variant(MODIFIER|||c.2952+2696G>A|2657|sif|protein_coding|CODING|FBtr0112712|16|1),intron_variant(MODIFIER|||c.2952+2696…
3L	5750928	.	G	A	30	PASS	EFF=synonymous_variant(LOW|SILENT|aaC/aaT|p.Asn222Asn/c.666C>T|334|DnaJ-1|protein_coding|CODING|FBtr0077123|2|1),synonymous_variant(LOW|SILENT|aaC/aaT|p.Asn222Asn/c.666C>T|334|DnaJ-1|protein_coding|CODING|FBtr0077124|1|1)
3L	5996461	.	C	T	30	PASS	EFF=upstream_gene_variant(MODIFIER||747||474|PVRAP|protein_coding|CODING|FBtr0077037||1),intergenic_region(MODIFIER||||||||||1)
3L	6004443	.	A	C	30	PASS	EFF=intron_variant(MODIFIER|||c.-359+6790A>C|474|PVRAP|protein_coding|CODING|FBtr0077037|1|1)
3L	6004464	.	C	T	30	PASS	EFF=intron_variant(MODIFIER|||c.-359+6811C>T|474|PVRAP|protein_coding|CODING|FBtr0077037|1|1)
3L	6069849	.	C	G	30	PASS	EFF=synonymous_variant(LOW|SILENT|gtC/gtG|p.Val265Val/c.795C>G|662|CG42269|protein_coding|CODING|FBtr0299610|2|1)
3L	6442659	.	C	T	30	PASS	EFF=intron_variant(MODIFIER|||c.-130-6448C>T|404|CG42747|protein_coding|CODING|FBtr0303270|1|1)
3L	6453229	.	C	G	30	PASS	EFF=intron_variant(MODIFIER|||c.-109+4101C>G|404|CG42747|protein_coding|CODING|FBtr0303270|2|1)
3L	7122967	.	G	A	30	PASS	EFF=3_prime_UTR_variant(MODIFIER||10|c.*10G>A|1717|form3|protein_coding|CODING|FBtr0113469|12|1),3_prime_UTR_variant(MODIFIER||10|c.*10G>A|1644|form3|protein_coding|CODING|FBtr0091533|11|1),downstream_gene_variant(MODIFIER||246||512|msl-3|protein_coding|CODING|FBtr0076926||1)
3L	7235107	.	C	G	30	PASS	EFF=synonymous_variant(LOW|SILENT|cgC/cgG|p.Arg108Arg/c.324C>G|219|CG14826|protein_coding|CODING|FBtr0076833|1|1),synonymous_variant(LOW|SILENT|cgC/cgG|p.Arg108Arg/c.324C>G|219|CG14826|protein_coding|CODING|FBtr0333366|1|1)
3L	7494506	.	G	A	30	PASS	EFF=synonymous_variant(LOW|SILENT|caC/caT|p.His188His/c.564C>T|463|Cyp4d8|protein_coding|CODING|FBtr0076832|3|1)
3L	8339230	.	C	T	30	PASS	EFF=downstream_gene_variant(MODIFIER||635||162|Cpr66Cb|protein_coding|CODING|FBtr0076601||1),intron_variant(MODIFIER|||c.37-27C>T|281|Pex2|protein_coding|CODING|FBtr0076602|1|1)
3L	8470571	.	T	C	30	PASS	EFF=intron_variant(MODIFIER|||c.5885+88T>C|1966|Gug|protein_coding|CODING|FBtr0076616|13|1),intron_variant(MODIFIER|||c.5951+88T>C|1988|Gug|protein_coding|CODING|FBtr0076618|14|1),intron_variant(MODIFIER|||c.5942+88T>C|1985|Gug|protein_coding|CODING|FBtr0076619|14|1),intron_variant(MODIFIER|||c.5942+88T>C|1985|Gug|protein_coding|CODING|FBtr0305696|13|1),intron_variant(MODIFIER|||c.5951+88T>C|1988…
3L	8757116	.	A	G	30	PASS	EFF=3_prime_UTR_variant(MODIFIER||130|c.*130A>G|267|CG6576|protein_coding|CODING|FBtr0076576|1|1),intron_variant(MODIFIER|||c.22-2214A>G|2528|Fhos|protein_coding|CODING|FBtr0333888|1|1),intron_variant(MODIFIER|||c.22-2214A>G|2528|Fhos|protein_coding|CODING|FBtr0333889|1|1)
3L	9494033	.	G	A	30	PASS	EFF=downstream_gene_variant(MODIFIER||522||471|path|protein_coding|CODING|FBtr0076427||1),downstream_gene_variant(MODIFIER||522||471|path|protein_coding|CODING|FBtr0333864||1),downstream_gene_variant(MODIFIER||522||458|path|protein_coding|CODING|FBtr0333865||1),intergenic_region(MODIFIER||||||||||1)
3L	9682841	.	A	C	30	PASS	EFF=synonymous_variant(LOW||gtC/gtC|p.Val314Val/c.942A>C|462|alphaTub67C|protein_coding|CODING|FBtr0076393|2|1|WARNING_REF_DOES_NOT_MATCH_GENOME),downstream_gene_variant(MODIFIER||738||350|CG6767|protein_coding|CODING|FBtr0076415||1),downstream_gene_variant(MODIFIER||738||388|CG6767|protein_coding|CODING|FBtr0076416||1),downstream_gene_variant(MODIFIER||738||354|CG6767|protein_coding|CODING|FBtr0…
3L	10950248	.	C	T	30	PASS	EFF=intergenic_region(MODIFIER||||||||||1)
3L	11888740	.	A	G	30	PASS	EFF=synonymous_variant(LOW|SILENT|cgT/cgC|p.Arg35Arg/c.105T>C|319|CG5897|protein_coding|CODING|FBtr0302207|2|1),intron_variant(MODIFIER|||c.1369-33864T>C|964|CG44837|protein_coding|CODING|FBtr0343552|2|1)
3L	11923375	.	T	A	30	PASS	EFF=synonymous_variant(LOW|SILENT|cgA/cgT|p.Arg439Arg/c.1317A>T|651|CG5718|protein_coding|CODING|FBtr0076069|1|1),downstream_gene_variant(MODIFIER||888||270|CG11588|protein_coding|CODING|FBtr0076038||1),downstream_gene_variant(MODIFIER||776||270|CG11588|protein_coding|CODING|FBtr0332069||1),intron_variant(MODIFIER|||c.1368+13598A>T|964|CG44837|protein_coding|CODING|FBtr0343552|2|1)
3L	12373821	.	C	A	30	PASS	EFF=missense_variant(MODERATE|MISSENSE|Gat/Tat|p.Asp388Tyr/c.1162G>T|1171|Ncc69|protein_coding|CODING|FBtr0333842|7|1),missense_variant(MODERATE|MISSENSE|Gat/Tat|p.Asp388Tyr/c.1162G>T|1191|Ncc69|protein_coding|CODING|FBtr0333841|7|1),missense_variant(MODERATE|MISSENSE|Gat/Tat|p.Asp388Tyr/c.1162G>T|1171|Ncc69|protein_coding|CODING|FBtr0075987|7|1),missense_variant(MODERATE|MISSENSE|Gat/Tat|p.Asp38…
3L	12519200	.	C	A	30	PASS	EFF=3_prime_UTR_variant(MODIFIER||49|c.*49C>A|647|tral|protein_coding|CODING|FBtr0332642|7|1),3_prime_UTR_variant(MODIFIER||49|c.*49C>A|652|tral|protein_coding|CODING|FBtr0075959|7|1),3_prime_UTR_variant(MODIFIER||49|c.*49C>A|656|tral|protein_coding|CODING|FBtr0332636|7|1),3_prime_UTR_variant(MODIFIER||49|c.*49C>A|642|tral|protein_coding|CODING|FBtr0332638|7|1),3_prime_UTR_variant(MODIFIER||49|c.…
3L	12819465	.	C	A	30	PASS	EFF=missense_variant(MODERATE|MISSENSE|Cag/Aag|p.Gln1206Lys/c.3616C>A|2730|CG42588|protein_coding|CODING|FBtr0301717|2|1),missense_variant(MODERATE|MISSENSE|Cag/Aag|p.Gln1181Lys/c.3541C>A|2705|CG42588|protein_coding|CODING|FBtr0304053|3|1)
3L	12834795	.	C	T	30	PASS	EFF=intron_variant(MODIFIER|||c.-25+517G>A|471|CG10960|protein_coding|CODING|FBtr0075941|2|1)
3L	13463300	.	T	C	30	PASS	EFF=intron_variant(MODIFIER|||c.1972-9T>C|1248|CG10738|protein_coding|CODING|FBtr0302487|11|1),intron_variant(MODIFIER|||c.1978-9T>C|1250|CG10738|protein_coding|CODING|FBtr0302488|12|1),intron_variant(MODIFIER|||c.1939-9T>C|1237|CG10738|protein_coding|CODING|FBtr0304791|12|1),intron_variant(MODIFIER|||c.1933-9T>C|1235|CG10738|protein_coding|CODING|FBtr0304792|11|1)
3L	13464671	.	C	T	30	PASS	EFF=synonymous_variant(LOW|SILENT|Ctg/Ttg|p.Leu1058Leu/c.3172C>T|1235|CG10738|protein_coding|CODING|FBtr0304792|14|1),synonymous_variant(LOW|SILENT|Ctg/Ttg|p.Leu1060Leu/c.3178C>T|1237|CG10738|protein_coding|CODING|FBtr0304791|15|1),synonymous_variant(LOW|SILENT|Ctg/Ttg|p.Leu1071Leu/c.3211C>T|1248|CG10738|protein_coding|CODING|FBtr0302487|14|1),synonymous_variant(LOW|SILENT|Ctg/Ttg|p.Leu1073Leu/c.…
3L	14737447	.	G	T	30	PASS	EFF=intron_variant(MODIFIER|||c.412-6742G>T|923|ome|protein_coding|CODING|FBtr0299649|2|1),intron_variant(MODIFIER|||c.-6-6742G>T|784|ome|protein_coding|CODING|FBtr0333043|1|1),intron_variant(MODIFIER|||c.48+1312G>T|1040|ome|protein_coding|CODING|FBtr0299651|2|1),intron_variant(MODIFIER|||c.48+1312G>T|802|ome|protein_coding|CODING|FBtr0299650|2|1)
3L	15082524	.	T	A	30	PASS	EFF=splice_region_variant(LOW|||c.2038A>T|2767|cp309|protein_coding|CODING|FBtr0305977|2|1),splice_region_variant(LOW|||c.2038A>T|2895|cp309|protein_coding|CODING|FBtr0305979|2|1),splice_region_variant(LOW|||c.2026A>T|2891|cp309|protein_coding|CODING|FBtr0333939|2|1),splice_region_variant(LOW|||c.1519A>T|2666|cp309|protein_coding|CODING|FBtr0333941|3|1),splice_region_variant(LOW|||c.2038A>T|2831|…
3L	15082525	.	G	A	30	PASS	EFF=splice_region_variant(LOW|||c.2038C>T|2767|cp309|protein_coding|CODING|FBtr0305977|2|1),splice_region_variant(LOW|||c.2038C>T|2895|cp309|protein_coding|CODING|FBtr0305979|2|1),splice_region_variant(LOW|||c.2026C>T|2891|cp309|protein_coding|CODING|FBtr0333939|2|1),splice_region_variant(LOW|||c.1519C>T|2666|cp309|protein_coding|CODING|FBtr0333941|3|1),splice_region_variant(LOW|||c.2038C>T|2831|…
3L	15082538	.	G	A	30	PASS	EFF=intron_variant(MODIFIER|||c.2038-20C>T|2767|cp309|protein_coding|CODING|FBtr0305977|2|1),intron_variant(MODIFIER|||c.2038-20C>T|2895|cp309|protein_coding|CODING|FBtr0305979|2|1),intron_variant(MODIFIER|||c.2026-20C>T|2891|cp309|protein_coding|CODING|FBtr0333939|2|1),intron_variant(MODIFIER|||c.1519-20C>T|2666|cp309|protein_coding|CODING|FBtr0333941|3|1),intron_variant(MODIFIER|||c.2038-20C>T|…
3L	15126197	.	C	T	30	PASS	EFF=upstream_gene_variant(MODIFIER||876||503|CG16959|protein_coding|CODING|FBtr0075655||1),upstream_gene_variant(MODIFIER||876||503|CG16959|protein_coding|CODING|FBtr0075656||1),upstream_gene_variant(MODIFIER||876||489|CG16959|protein_coding|CODING|FBtr0303378||1),upstream_gene_variant(MODIFIER||876||489|CG16959|protein_coding|CODING|FBtr0333935||1),upstream_gene_variant(MODIFIER||876||489|CG1695…
3L	15162804	.	A	G	30	PASS	EFF=synonymous_variant(LOW||gcC/gcC|p.Ala158Ala/c.474T>C|373|CG7011|protein_coding|CODING|FBtr0075645|3|1|WARNING_REF_DOES_NOT_MATCH_GENOME),downstream_gene_variant(MODIFIER||334||79|CG6878|protein_coding|CODING|FBtr0075643||1)
3L	16823884	.	A	G	30	PASS	EFF=intron_variant(MODIFIER|||c.18+4587T>C|241|CG13024|protein_coding|CODING|FBtr0305913|1|1)
3L	17323659	.	A	G	30	PASS	EFF=synonymous_variant(LOW||aaG/aaG|p.Lys273Lys/c.819A>G|550|CG13724|protein_coding|CODING|FBtr0075214|1|1|WARNING_REF_DOES_NOT_MATCH_GENOME),downstream_gene_variant(MODIFIER||959||199|CG13725|protein_coding|CODING|FBtr0075248||1)
3R	4603684	.	T	A	30	PASS	EFF=intergenic_region(MODIFIER||||||||||1)
3R	9542752	.	G	A	30	PASS	EFF=synonymous_variant(LOW||Tac/Tac|p.Tyr188Tyr/c.562C>T|1173|mura|protein_coding|CODING|FBtr0082118|3|1|WARNING_REF_DOES_NOT_MATCH_GENOME),intron_variant(MODIFIER|||c.390-743C>T|868|mura|protein_coding|CODING|FBtr0082116|2|1),intron_variant(MODIFIER|||c.390-743C>T|868|mura|protein_coding|CODING|FBtr0082117|3|1)
3R	9628070	.	C	T	30	PASS	EFF=synonymous_variant(LOW|SILENT|acC/acT|p.Thr204Thr/c.612C>T|383|CG8319|protein_coding|CODING|FBtr0082077|2|1),downstream_gene_variant(MODIFIER||621||406|Crc|protein_coding|CODING|FBtr0334618||1),downstream_gene_variant(MODIFIER||868||406|Crc|protein_coding|CODING|FBtr0082103||1)
3R	11128636	.	G	A	30	PASS	EFF=upstream_gene_variant(MODIFIER||308||516|Ugt86Dd|protein_coding|CODING|FBtr0113321||1|WARNING_TRANSCRIPT_INCOMPLETE),intergenic_region(MODIFIER||||||||||1)
3R	14406576	.	G	A	30	PASS	EFF=intron_variant(MODIFIER|||c.4132+1578C>T|2351|cv-c|protein_coding|CODING|FBtr0112630|8|1),intron_variant(MODIFIER|||c.4132+1578C>T|2351|cv-c|protein_coding|CODING|FBtr0112632|9|1)
3R	17537649	.	G	A	30	PASS	EFF=synonymous_variant(LOW|SILENT|taC/taT|p.Tyr720Tyr/c.2160C>T|852|l_3_07882|protein_coding|CODING|FBtr0083504|2|1),downstream_gene_variant(MODIFIER||726||273|P5cr-2|protein_coding|CODING|FBtr0083454||1),downstream_gene_variant(MODIFIER||726||252|P5cr-2|protein_coding|CODING|FBtr0321265||1),downstream_gene_variant(MODIFIER||513||174|P5cr-2|protein_coding|CODING|FBtr0083455||1),downstream_gene_va…
3R	20434253	.	C	T	30	PASS	EFF=intron_variant(MODIFIER|||c.244+3428G>A|1279|Gfrl|protein_coding|CODING|FBtr0306199|2|1),intron_variant(MODIFIER|||c.244+3428G>A|1168|Gfrl|protein_coding|CODING|FBtr0306203|2|1),intron_variant(MODIFIER|||c.244+3428G>A|1042|Gfrl|protein_coding|CODING|FBtr0340192|2|1),intron_variant(MODIFIER|||c.44-23049G>A|864|Gfrl|protein_coding|CODING|FBtr0306200|3|1),intron_variant(MODIFIER|||c.44-23049G>A|…
3R	21758905	.	G	A	30	PASS	EFF=synonymous_variant(LOW|SILENT|cgG/cgA|p.Arg44Arg/c.132G>A|924|CG42335|protein_coding|CODING|FBtr0344211|1|1|WARNING_TRANSCRIPT_INCOMPLETE)
3R	21809138	.	C	T	30	PASS	EFF=upstream_gene_variant(MODIFIER||449||591|CASK|protein_coding|CODING|FBtr0112872||1),upstream_gene_variant(MODIFIER||449||469|CASK|protein_coding|CODING|FBtr0112873||1),upstream_gene_variant(MODIFIER||449||609|CASK|protein_coding|CODING|FBtr0301328||1),intron_variant(MODIFIER|||c.1332+7963G>A|898|CASK|protein_coding|CODING|FBtr0084161|8|1),intron_variant(MODIFIER|||c.1332+7963G>A|916|CASK|prot…
3R	21809171	.	G	A	30	PASS	EFF=upstream_gene_variant(MODIFIER||482||591|CASK|protein_coding|CODING|FBtr0112872||1),upstream_gene_variant(MODIFIER||482||469|CASK|protein_coding|CODING|FBtr0112873||1),upstream_gene_variant(MODIFIER||482||609|CASK|protein_coding|CODING|FBtr0301328||1),intron_variant(MODIFIER|||c.1332+7930C>T|898|CASK|protein_coding|CODING|FBtr0084161|8|1),intron_variant(MODIFIER|||c.1332+7930C>T|916|CASK|prot…
3R	28485362	.	G	A	30	PASS	EFF=synonymous_variant(LOW||aaA/aaA|p.Lys210Lys/c.630G>A|421|CG1894|protein_coding|CODING|FBtr0085290|2|1|WARNING_REF_DOES_NOT_MATCH_GENOME)
3R	28485373	.	G	A	30	PASS	EFF=synonymous_variant(LOW||tAt/tAt|p.Tyr214Tyr/c.641G>A|421|CG1894|protein_coding|CODING|FBtr0085290|2|1|WARNING_REF_DOES_NOT_MATCH_GENOME)
3R	28485434	.	C	A	30	PASS	EFF=synonymous_variant(LOW||tcA/tcA|p.Ser234Ser/c.702C>A|421|CG1894|protein_coding|CODING|FBtr0085290|2|1|WARNING_REF_DOES_NOT_MATCH_GENOME)
3R	28485461	.	A	T	30	PASS	EFF=synonymous_variant(LOW||atT/atT|p.Ile243Ile/c.729A>T|421|CG1894|protein_coding|CODING|FBtr0085290|2|1|WARNING_REF_DOES_NOT_MATCH_GENOME)
3R	28485494	.	A	C	30	PASS	EFF=synonymous_variant(LOW||atC/atC|p.Ile254Ile/c.762A>C|421|CG1894|protein_coding|CODING|FBtr0085290|2|1|WARNING_REF_DOES_NOT_MATCH_GENOME)
3R	28485657	.	A	G	30	PASS	EFF=synonymous_variant(LOW||Gag/Gag|p.Glu309Glu/c.925A>G|421|CG1894|protein_coding|CODING|FBtr0085290|2|1|WARNING_REF_DOES_NOT_MATCH_GENOME)
3R	28864385	.	C	T	30	PASS	EFF=synonymous_variant(LOW|SILENT|Ctg/Ttg|p.Leu639Leu/c.1915C>T|2008|spg|protein_coding|CODING|FBtr0330305|7|1),synonymous_variant(LOW|SILENT|Ctg/Ttg|p.Leu639Leu/c.1915C>T|2187|spg|protein_coding|CODING|FBtr0330304|7|1),synonymous_variant(LOW|SILENT|Ctg/Ttg|p.Leu639Leu/c.1915C>T|2002|spg|protein_coding|CODING|FBtr0330303|7|1),synonymous_variant(LOW|SILENT|Ctg/Ttg|p.Leu639Leu/c.1915C>T|2008|spg|pr…
3R	28926416	.	T	C	30	PASS	EFF=intron_variant(MODIFIER|||c.719-51A>G|413|CG14521|protein_coding|CODING|FBtr0085347|7|1)
3R	30307513	.	A	G	30	PASS	EFF=upstream_gene_variant(MODIFIER||876||87|CG34300|protein_coding|CODING|FBtr0305269||1),upstream_gene_variant(MODIFIER||873||140|CG34300|protein_coding|CODING|FBtr0112496||1),intron_variant(MODIFIER|||c.1305-1639A>G|650|hdc|protein_coding|CODING|FBtr0085619|1|1),intron_variant(MODIFIER|||c.1305-1639A>G|1080|hdc|protein_coding|CODING|FBtr0085621|1|1),intron_variant(MODIFIER|||c.1305-1639A>G|650|…
3R	31098020	.	G	A	30	PASS	EFF=upstream_gene_variant(MODIFIER||699||295|CG11317|protein_coding|CODING|FBtr0085741||1),upstream_gene_variant(MODIFIER||699||298|CG11317|protein_coding|CODING|FBtr0334547||1),downstream_gene_variant(MODIFIER||848||521|CG15553|protein_coding|CODING|FBtr0290201||1),intergenic_region(MODIFIER||||||||||1)
3R	31379494	.	C	T	30	PASS	EFF=intergenic_region(MODIFIER||||||||||1)
X	2234552	.	G	A	30	PASS	EFF=synonymous_variant(LOW||ttA/ttA|p.Leu2754Leu/c.8262G>A|3413|pcx|protein_coding|CODING|FBtr0344153|9|1|WARNING_REF_DOES_NOT_MATCH_GENOME),synonymous_variant(LOW||ttA/ttA|p.Leu2754Leu/c.8262G>A|3413|pcx|protein_coding|CODING|FBtr0332381|9|1|WARNING_REF_DOES_NOT_MATCH_GENOME),synonymous_variant(LOW||ttA/ttA|p.Leu2758Leu/c.8274G>A|3417|pcx|protein_coding|CODING|FBtr0342766|9|1|WARNING_REF_DOES_NO…
X	2234561	.	T	C	30	PASS	EFF=synonymous_variant(LOW||atC/atC|p.Ile2757Ile/c.8271T>C|3413|pcx|protein_coding|CODING|FBtr0344153|9|1|WARNING_REF_DOES_NOT_MATCH_GENOME),synonymous_variant(LOW||atC/atC|p.Ile2757Ile/c.8271T>C|3413|pcx|protein_coding|CODING|FBtr0332381|9|1|WARNING_REF_DOES_NOT_MATCH_GENOME),synonymous_variant(LOW||atC/atC|p.Ile2761Ile/c.8283T>C|3417|pcx|protein_coding|CODING|FBtr0342766|9|1|WARNING_REF_DOES_NO…
X	2699460	.	C	T	30	PASS	EFF=intron_variant(MODIFIER|||c.487+122C>T|446|CG2662|protein_coding|CODING|FBtr0070478|2|1),intron_variant(MODIFIER|||c.487+122C>T|446|CG2662|protein_coding|CODING|FBtr0345709|2|1)
X	5722914	.	C	T	30	PASS	EFF=synonymous_variant(LOW|SILENT|aaG/aaA|p.Lys113Lys/c.339G>A|430|CG32758|protein_coding|CODING|FBtr0340670|4|1),synonymous_variant(LOW|SILENT|aaG/aaA|p.Lys214Lys/c.642G>A|531|CG32758|protein_coding|CODING|FBtr0070843|4|1),synonymous_variant(LOW|SILENT|aaG/aaA|p.Lys126Lys/c.378G>A|443|CG32758|protein_coding|CODING|FBtr0339525|4|1)
X	10041966	.	T	A	30	PASS	EFF=synonymous_variant(LOW||gaA/gaA|p.Glu3642Glu/c.10926T>A|4611|Cht6|protein_coding|CODING|FBtr0307369|12|1|WARNING_REF_DOES_NOT_MATCH_GENOME),synonymous_variant(LOW||gaA/gaA|p.Glu3642Glu/c.10926T>A|4519|Cht6|protein_coding|CODING|FBtr0307374|11|1|WARNING_REF_DOES_NOT_MATCH_GENOME),synonymous_variant(LOW||gaA/gaA|p.Glu1348Glu/c.4044T>A|2225|Cht6|protein_coding|CODING|FBtr0307372|10|1|WARNING_REF…
X	13333572	.	C	A	30	PASS	EFF=intergenic_region(MODIFIER||||||||||1)
X	13768614	.	T	A	30	PASS	EFF=intron_variant(MODIFIER|||c.79-45T>A|1259|rdgB|protein_coding|CODING|FBtr0073822|2|1),intron_variant(MODIFIER|||c.79-45T>A|1250|rdgB|protein_coding|CODING|FBtr0073823|1|1),intron_variant(MODIFIER|||c.79-45T>A|1259|rdgB|protein_coding|CODING|FBtr0100194|3|1),intron_variant(MODIFIER|||c.79-45T>A|1259|rdgB|protein_coding|CODING|FBtr0100195|2|1),intron_variant(MODIFIER|||c.79-45T>A|1241|rdgB|prot…
X	15014134	.	C	T	30	PASS	EFF=synonymous_variant(LOW||gaA/gaA|p.Glu4250Glu/c.12750G>A|5233|hiw|protein_coding|CODING|FBtr0346087|18|1|WARNING_REF_DOES_NOT_MATCH_GENOME),synonymous_variant(LOW||gaA/gaA|p.Glu4250Glu/c.12750G>A|5233|hiw|protein_coding|CODING|FBtr0073970|18|1|WARNING_REF_DOES_NOT_MATCH_GENOME)
X	16534062	.	T	A	30	PASS	EFF=upstream_gene_variant(MODIFIER||966||2097|para|protein_coding|CODING|FBtr0303687||1),intergenic_region(MODIFIER||||||||||1)
X	19469717	.	G	A	30	PASS	EFF=3_prime_UTR_variant(MODIFIER||167|c.*167G>A|931|kek5|protein_coding|CODING|FBtr0074707|6|1),3_prime_UTR_variant(MODIFIER||167|c.*167G>A|931|kek5|protein_coding|CODING|FBtr0074708|6|1),3_prime_UTR_variant(MODIFIER||167|c.*167G>A|931|kek5|protein_coding|CODING|FBtr0309223|8|1),3_prime_UTR_variant(MODIFIER||167|c.*167G>A|931|kek5|protein_coding|CODING|FBtr0309224|5|1)
X	19688447	.	T	C	30	PASS	EFF=synonymous_variant(LOW|SILENT|tcA/tcG|p.Ser115Ser/c.345A>G|286|CG14227|protein_coding|CODING|FBtr0300350|3|1),downstream_gene_variant(MODIFIER||789||547|Ubqn|protein_coding|CODING|FBtr0340612||1)
X	19690248	.	G	A	30	PASS	EFF=3_prime_UTR_variant(MODIFIER||584|c.*584C>T|635|Mer|protein_coding|CODING|FBtr0345992|5|1),downstream_gene_variant(MODIFIER||346||635|Mer|protein_coding|CODING|FBtr0074754||1)
X	19692279	.	A	G	30	PASS	EFF=intron_variant(MODIFIER|||c.657+22T>C|635|Mer|protein_coding|CODING|FBtr0074754|2|1),intron_variant(MODIFIER|||c.657+22T>C|635|Mer|protein_coding|CODING|FBtr0345992|2|1)
X	21515268	.	T	A	30	PASS	EFF=intron_variant(MODIFIER|||n.166+4584A>T||CR45082||NON_CODING|FBtr0344464|1|1)
dmel_mitochondrion_genome	10681	.	C	T	30	PASS	EFF=synonymous_variant(LOW|SILENT|Cta/Tta|p.Leu62Leu/c.184C>T|379|mt:Cyt-b|protein_coding|CODING|FBtr0100884|1|1|WARNING_TRANSCRIPT_MULTIPLE_STOP_CODONS),upstream_gene_variant(MODIFIER||847||96|mt:ND4L|protein_coding|CODING|FBtr0100880||1|WARNING_TRANSCRIPT_MULTIPLE_STOP_CODONS),upstream_gene_variant(MODIFIER||718|||mt:tRNA:P||NON_CODING|FBtr0100882||1),upstream_gene_variant(MODIFIER||956|||mt:tR…
dmel_mitochondrion_genome	12131	.	T	C	30	PASS	EFF=synonymous_variant(LOW|SILENT|atA/atG|p.Met176Met/c.528A>G|312|mt:ND1|protein_coding|CODING|FBtr0100886|1|1|WARNING_TRANSCRIPT_MULTIPLE_STOP_CODONS),downstream_gene_variant(MODIFIER||494||379|mt:Cyt-b|protein_coding|CODING|FBtr0100884||1|WARNING_TRANSCRIPT_MULTIPLE_STOP_CODONS),downstream_gene_variant(MODIFIER||538|||mt:tRNA:L:CUN||NON_CODING|FBtr0100887||1),downstream_gene_variant(MODIFIER||…
dmel_mitochondrion_genome	12344	.	A	C	30	PASS	EFF=synonymous_variant(LOW|SILENT|ggT/ggG|p.Gly105Gly/c.315T>G|312|mt:ND1|protein_coding|CODING|FBtr0100886|1|1|WARNING_TRANSCRIPT_MULTIPLE_STOP_CODONS),downstream_gene_variant(MODIFIER||707||379|mt:Cyt-b|protein_coding|CODING|FBtr0100884||1|WARNING_TRANSCRIPT_MULTIPLE_STOP_CODONS),downstream_gene_variant(MODIFIER||325|||mt:tRNA:L:CUN||NON_CODING|FBtr0100887||1),downstream_gene_variant(MODIFIER||…
dmel_mitochondrion_genome	2661	.	T	C	30	PASS	EFF=synonymous_variant(LOW||ccC/ccC|p.Pro396Pro/c.1188T>C|512|mt:CoI|protein_coding|CODING|FBtr0100861|1|1|WARNING_TRANSCRIPT_MULTIPLE_STOP_CODONS+WARNING_REF_DOES_NOT_MATCH_GENOME),upstream_gene_variant(MODIFIER||351|||mt:tRNA:L:UUR||NON_CODING|FBtr0100862||1),upstream_gene_variant(MODIFIER||422||228|mt:CoII|protein_coding|CODING|FBtr0100863||1|WARNING_TRANSCRIPT_INCOMPLETE)
dmel_mitochondrion_genome	3583	.	C	T	30	PASS	EFF=synonymous_variant(LOW||gcT/gcT|p.Ala167Ala/c.501C>T|228|mt:CoII|protein_coding|CODING|FBtr0100863|1|1|WARNING_TRANSCRIPT_INCOMPLETE+WARNING_REF_DOES_NOT_MATCH_GENOME),upstream_gene_variant(MODIFIER||185|||mt:tRNA:K||NON_CODING|FBtr0100864||1),upstream_gene_variant(MODIFIER||257|||mt:tRNA:D||NON_CODING|FBtr0100865||1),upstream_gene_variant(MODIFIER||324||54|mt:ATPase8|protein_coding|CODING|FB…
dmel_mitochondrion_genome	4247	.	T	C	30	PASS	EFF=synonymous_variant(LOW|SILENT|ggA/ggC|p.Gly62Gly/c.186T>C|225|mt:ATPase6|protein_coding|CODING|FBtr0100867|1|1|WARNING_TRANSCRIPT_MULTIPLE_STOP_CODONS+WARNING_REF_DOES_NOT_MATCH_GENOME),upstream_gene_variant(MODIFIER||489||263|mt:CoIII|protein_coding|CODING|FBtr0100868||1|WARNING_TRANSCRIPT_MULTIPLE_STOP_CODONS),downstream_gene_variant(MODIFIER||477||228|mt:CoII|protein_coding|CODING|FBtr0100…
dmel_mitochondrion_genome	5396	.	T	C	30	PASS	EFF=synonymous_variant(LOW|SILENT|Tta/Cta|p.Leu221Leu/c.661T>C|263|mt:CoIII|protein_coding|CODING|FBtr0100868|1|1|WARNING_TRANSCRIPT_MULTIPLE_STOP_CODONS),upstream_gene_variant(MODIFIER||147|||mt:tRNA:G||NON_CODING|FBtr0100869||1),upstream_gene_variant(MODIFIER||212||118|mt:ND3|protein_coding|CODING|FBtr0100870||1|WARNING_TRANSCRIPT_MULTIPLE_STOP_CODONS),upstream_gene_variant(MODIFIER||585|||mt:t…
dmel_mitochondrion_genome	6982	.	A	G	30	PASS	EFF=synonymous_variant(LOW|SILENT|taT/taC|p.Tyr381Tyr/c.1143T>C|573|mt:ND5|protein_coding|CODING|FBtr0100877|1|1|WARNING_TRANSCRIPT_INCOMPLETE),upstream_gene_variant(MODIFIER||581|||mt:tRNA:F||NON_CODING|FBtr0100876||1),downstream_gene_variant(MODIFIER||937|||mt:tRNA:A||NON_CODING|FBtr0100871||1),downstream_gene_variant(MODIFIER||864|||mt:tRNA:R||NON_CODING|FBtr0100872||1),downstream_gene_variant…
dmel_mitochondrion_genome	7674	.	G	T	30	PASS	EFF=missense_variant(MODERATE|MISSENSE|Ctt/Att|p.Leu151Ile/c.451C>A|573|mt:ND5|protein_coding|CODING|FBtr0100877|1|1|WARNING_TRANSCRIPT_INCOMPLETE),downstream_gene_variant(MODIFIER||466|||mt:tRNA:H||NON_CODING|FBtr0100878||1),downstream_gene_variant(MODIFIER||532||445|mt:ND4|protein_coding|CODING|FBtr0100879||1|WARNING_TRANSCRIPT_INCOMPLETE)
dmel_mitochondrion_genome	7870	.	A	G	30	PASS	EFF=synonymous_variant(LOW||ttC/ttC|p.Phe85Phe/c.255T>C|573|mt:ND5|protein_coding|CODING|FBtr0100877|1|1|WARNING_TRANSCRIPT_INCOMPLETE+WARNING_REF_DOES_NOT_MATCH_GENOME),downstream_gene_variant(MODIFIER||270|||mt:tRNA:H||NON_CODING|FBtr0100878||1),downstream_gene_variant(MODIFIER||336||445|mt:ND4|protein_coding|CODING|FBtr0100879||1|WARNING_TRANSCRIPT_INCOMPLETE)
dmel_mitochondrion_genome	7997	.	C	A	30	PASS	EFF=stop_lost(HIGH|MISSENSE|aGa/aTa|p.Ter43Metext*?/c.128G>T|573|mt:ND5|protein_coding|CODING|FBtr0100877|1|1|WARNING_TRANSCRIPT_INCOMPLETE),downstream_gene_variant(MODIFIER||143|||mt:tRNA:H||NON_CODING|FBtr0100878||1),downstream_gene_variant(MODIFIER||209||445|mt:ND4|protein_coding|CODING|FBtr0100879||1|WARNING_TRANSCRIPT_INCOMPLETE)
dmel_mitochondrion_genome	8875	.	G	A	30	PASS	EFF=synonymous_variant(LOW|SILENT|Cta/Tta|p.Leu224Leu/c.670C>T|445|mt:ND4|protein_coding|CODING|FBtr0100879|1|1|WARNING_TRANSCRIPT_INCOMPLETE),upstream_gene_variant(MODIFIER||751||573|mt:ND5|protein_coding|CODING|FBtr0100877||1|WARNING_TRANSCRIPT_INCOMPLETE),upstream_gene_variant(MODIFIER||670|||mt:tRNA:H||NON_CODING|FBtr0100878||1),upstream_gene_variant(MODIFIER||962|||mt:tRNA:T||NON_CODING|FBtr…
dmel_mitochondrion_genome	8981	.	T	C	30	PASS	EFF=synonymous_variant(LOW||ttG/ttG|p.Leu188Leu/c.564A>G|445|mt:ND4|protein_coding|CODING|FBtr0100879|1|1|WARNING_TRANSCRIPT_INCOMPLETE+WARNING_REF_DOES_NOT_MATCH_GENOME),upstream_gene_variant(MODIFIER||857||573|mt:ND5|protein_coding|CODING|FBtr0100877||1|WARNING_TRANSCRIPT_INCOMPLETE),upstream_gene_variant(MODIFIER||776|||mt:tRNA:H||NON_CODING|FBtr0100878||1),upstream_gene_variant(MODIFIER||856|…

## Sheet: MB_C3.13 SNPEff candidate SNPs
##SnpEffVersion="4.0e (build 2014-09-13), by Pablo Cingolani"
##SnpEffCmd="SnpEff dm6.01 /Users/pgriffin/Documents/Drosophila Selection Experiment/snp_and_gene_lists/C3_fet_drift_sig_SNPs_150821.vcf "
##INFO=<ID=EFF,Number=.,Type=String,Description="Predicted effects for this variant.Format: 'Effect ( Effect_Impact | Functional_Class | Codon_Change | Amino_Acid_Change| Amino_Acid_length | Gene_Name | Transcript_BioType | Gene_Coding | Transcript_ID | Exon_Rank | Genotype_Number [ | ERRORS | WARNINGS ] )' ">
##INFO=<ID=LOF,Number=.,Type=String,Description="Predicted loss of function effects for this variant. Format: 'Gene_Name | Gene_ID | Number_of_transcripts_in_gene | Percent_of_transcripts_affected' ">
##INFO=<ID=NMD,Number=.,Type=String,Description="Predicted nonsense mediated decay effects for this variant. Format: 'Gene_Name | Gene_ID | Number_of_transcripts_in_gene | Percent_of_transcripts_affected' ">
#CHROM	POS	ID	REF	ALT	QUAL	FILTER	INFO
2L	785038	.	T	C	30	PASS	EFF=synonymous_variant(LOW||gcC/gcC|p.Ala206Ala/c.618T>C|572|CG3544|protein_coding|CODING|FBtr0078007|1|1|WARNING_REF_DOES_NOT_MATCH_GENOME),synonymous_variant(LOW||gcC/gcC|p.Ala206Ala/c.618T>C|572|CG3544|protein_coding|CODING|FBtr0331652|1|1|WARNING_REF_DOES_NOT_MATCH_GENOME)
2L	823289	.	C	T	30	PASS	EFF=synonymous_variant(LOW|SILENT|ttC/ttT|p.Phe130Phe/c.390C>T|269|CG3662|protein_coding|CODING|FBtr0100469|1|1),synonymous_variant(LOW|SILENT|ttC/ttT|p.Phe180Phe/c.540C>T|319|CG3662|protein_coding|CODING|FBtr0078012|2|1),synonymous_variant(LOW|SILENT|ttC/ttT|p.Phe180Phe/c.540C>T|319|CG3662|protein_coding|CODING|FBtr0305507|2|1),synonymous_variant(LOW|SILENT|ttC/ttT|p.Phe180Phe/c.540C>T|319|CG366…
2L	2138162	.	C	G	30	PASS	EFF=splice_region_variant(LOW|||c.4585G>C|1641|tho2|protein_coding|CODING|FBtr0334814|12|1),splice_region_variant(LOW|||c.4582G>C|1641|tho2|protein_coding|CODING|FBtr0077853|12|1),splice_region_variant(LOW|||c.4585G>C|1642|tho2|protein_coding|CODING|FBtr0301660|12|1),downstream_gene_variant(MODIFIER||866||844|GlyP|protein_coding|CODING|FBtr0077828||1),intron_variant(MODIFIER|||c.4585-7G>C|1641|th…
2L	2703538	.	G	A	30	PASS	EFF=intron_variant(MODIFIER|||c.30-1388G>A|859|CG31690|protein_coding|CODING|FBtr0301682|2|1)
2L	2866195	.	T	G	30	PASS	EFF=intron_variant(MODIFIER|||c.532-137T>G|562|CG2991|protein_coding|CODING|FBtr0077625|4|1),intron_variant(MODIFIER|||c.532-137T>G|562|CG2991|protein_coding|CODING|FBtr0077626|3|1),intron_variant(MODIFIER|||c.532-137T>G|562|CG2991|protein_coding|CODING|FBtr0077627|3|1)
2L	2904128	.	C	T	30	PASS	EFF=intron_variant(MODIFIER|||c.-2+17995C>T|1614|lilli|protein_coding|CODING|FBtr0290040|1|1),intron_variant(MODIFIER|||c.-122-8640C>T|1614|lilli|protein_coding|CODING|FBtr0290039|1|1),intron_variant(MODIFIER|||c.-819+13212C>T|1673|lilli|protein_coding|CODING|FBtr0290041|1|1),intron_variant(MODIFIER|||c.-756+13212C>T|1673|lilli|protein_coding|CODING|FBtr0077632|2|1),intron_variant(MODIFIER|||c.-5…
2L	2949987	.	G	A	30	PASS	EFF=synonymous_variant(LOW|SILENT|gtG/gtA|p.Val996Val/c.2988G>A|1614|lilli|protein_coding|CODING|FBtr0332458|6|1),synonymous_variant(LOW|SILENT|gtG/gtA|p.Val996Val/c.2988G>A|1614|lilli|protein_coding|CODING|FBtr0290039|6|1),synonymous_variant(LOW|SILENT|gtG/gtA|p.Val996Val/c.2988G>A|1614|lilli|protein_coding|CODING|FBtr0290038|5|1),synonymous_variant(LOW|SILENT|gtG/gtA|p.Val1055Val/c.3165G>A|1673…
2L	3104196	.	A	G	30	PASS	EFF=intron_variant(MODIFIER|||c.244+4529T>C|936|toc|protein_coding|CODING|FBtr0335388|2|1),intron_variant(MODIFIER|||c.3778+4529T>C|2162|toc|protein_coding|CODING|FBtr0077662|4|1),intron_variant(MODIFIER|||c.244+4529T>C|984|toc|protein_coding|CODING|FBtr0077663|2|1),intron_variant(MODIFIER|||c.-354+3720T>C|945|toc|protein_coding|CODING|FBtr0110903|1|1),intron_variant(MODIFIER|||c.-354+3720T>C|993…
2L	3400117	.	C	T	30	PASS	EFF=intergenic_region(MODIFIER||||||||||1)
2L	3916974	.	G	A	30	PASS	EFF=synonymous_variant(LOW|SILENT|taC/taT|p.Tyr1134Tyr/c.3402C>T|1447|fred|protein_coding|CODING|FBtr0308127|7|1),synonymous_variant(LOW|SILENT|taC/taT|p.Tyr1134Tyr/c.3402C>T|1198|fred|protein_coding|CODING|FBtr0308126|7|1),synonymous_variant(LOW|SILENT|taC/taT|p.Tyr1134Tyr/c.3402C>T|1323|fred|protein_coding|CODING|FBtr0308125|7|1)
2L	3917307	.	A	G	30	PASS	EFF=synonymous_variant(LOW|SILENT|agT/agC|p.Ser1023Ser/c.3069T>C|1447|fred|protein_coding|CODING|FBtr0308127|7|1),synonymous_variant(LOW|SILENT|agT/agC|p.Ser1023Ser/c.3069T>C|1198|fred|protein_coding|CODING|FBtr0308126|7|1),synonymous_variant(LOW|SILENT|agT/agC|p.Ser1023Ser/c.3069T>C|1323|fred|protein_coding|CODING|FBtr0308125|7|1)
2L	3917337	.	G	A	30	PASS	EFF=synonymous_variant(LOW|SILENT|tgC/tgT|p.Cys1013Cys/c.3039C>T|1447|fred|protein_coding|CODING|FBtr0308127|7|1),synonymous_variant(LOW|SILENT|tgC/tgT|p.Cys1013Cys/c.3039C>T|1198|fred|protein_coding|CODING|FBtr0308126|7|1),synonymous_variant(LOW|SILENT|tgC/tgT|p.Cys1013Cys/c.3039C>T|1323|fred|protein_coding|CODING|FBtr0308125|7|1)
2L	3917549	.	C	T	30	PASS	EFF=intron_variant(MODIFIER|||c.2920+14G>A|1323|fred|protein_coding|CODING|FBtr0308125|6|1),intron_variant(MODIFIER|||c.2920+14G>A|1198|fred|protein_coding|CODING|FBtr0308126|6|1),intron_variant(MODIFIER|||c.2920+14G>A|1447|fred|protein_coding|CODING|FBtr0308127|6|1)
2L	3917554	.	A	T	30	PASS	EFF=intron_variant(MODIFIER|||c.2920+9T>A|1323|fred|protein_coding|CODING|FBtr0308125|6|1),intron_variant(MODIFIER|||c.2920+9T>A|1198|fred|protein_coding|CODING|FBtr0308126|6|1),intron_variant(MODIFIER|||c.2920+9T>A|1447|fred|protein_coding|CODING|FBtr0308127|6|1)
2L	4189966	.	A	G	30	PASS	EFF=synonymous_variant(LOW|SILENT|aaT/aaC|p.Asn660Asn/c.1980T>C|667|CG3714|protein_coding|CODING|FBtr0077483|12|1),synonymous_variant(LOW|SILENT|aaT/aaC|p.Asn543Asn/c.1629T>C|550|CG3714|protein_coding|CODING|FBtr0334791|11|1),synonymous_variant(LOW|SILENT|aaT/aaC|p.Asn660Asn/c.1980T>C|667|CG3714|protein_coding|CODING|FBtr0077482|12|1),synonymous_variant(LOW|SILENT|aaT/aaC|p.Asn660Asn/c.1980T>C|66…
2L	4213359	.	A	G	30	PASS	EFF=synonymous_variant(LOW|SILENT|atT/atC|p.Ile1494Ile/c.4482T>C|5147|ft|protein_coding|CODING|FBtr0077478|2|1)
2L	4344285	.	C	T	30	PASS	EFF=synonymous_variant(LOW|SILENT|atC/atT|p.Ile768Ile/c.2304C>T|832|Atet|protein_coding|CODING|FBtr0077426|7|1),synonymous_variant(LOW|SILENT|atC/atT|p.Ile768Ile/c.2304C>T|832|Atet|protein_coding|CODING|FBtr0077427|7|1),synonymous_variant(LOW|SILENT|atC/atT|p.Ile754Ile/c.2262C>T|818|Atet|protein_coding|CODING|FBtr0112898|7|1),synonymous_variant(LOW|SILENT|atC/atT|p.Ile768Ile/c.2304C>T|832|Atet|pr…
2L	4344327	.	C	T	30	PASS	EFF=synonymous_variant(LOW|SILENT|taC/taT|p.Tyr782Tyr/c.2346C>T|832|Atet|protein_coding|CODING|FBtr0077426|7|1),synonymous_variant(LOW|SILENT|taC/taT|p.Tyr782Tyr/c.2346C>T|832|Atet|protein_coding|CODING|FBtr0077427|7|1),synonymous_variant(LOW|SILENT|taC/taT|p.Tyr768Tyr/c.2304C>T|818|Atet|protein_coding|CODING|FBtr0112898|7|1),synonymous_variant(LOW|SILENT|taC/taT|p.Tyr782Tyr/c.2346C>T|832|Atet|pr…
2L	4469465	.	G	C	30	PASS	EFF=synonymous_variant(LOW||acG/acG|p.Thr543Thr/c.1629C>G|943|ine|protein_coding|CODING|FBtr0301408|8|1|WARNING_REF_DOES_NOT_MATCH_GENOME),synonymous_variant(LOW||acG/acG|p.Thr543Thr/c.1629C>G|943|ine|protein_coding|CODING|FBtr0301407|8|1|WARNING_REF_DOES_NOT_MATCH_GENOME),synonymous_variant(LOW||acG/acG|p.Thr543Thr/c.1629C>G|943|ine|protein_coding|CODING|FBtr0077446|8|1|WARNING_REF_DOES_NOT_MATC…
2L	4483452	.	C	T	30	PASS	EFF=synonymous_variant(LOW||gaA/gaA|p.Glu21688Glu/c.65064G>A|22949|dp|protein_coding|CODING|FBtr0332345|80|1|WARNING_REF_DOES_NOT_MATCH_GENOME),synonymous_variant(LOW||gaA/gaA|p.Glu21569Glu/c.64707G>A|22830|dp|protein_coding|CODING|FBtr0332346|79|1|WARNING_REF_DOES_NOT_MATCH_GENOME),synonymous_variant(LOW||gaA/gaA|p.Glu13844Glu/c.41532G>A|15105|dp|protein_coding|CODING|FBtr0305142|45|1|WARNING_RE…
2L	4684021	.	G	T	30	PASS	EFF=missense_variant(MODERATE|MISSENSE|Ccg/Acg|p.Pro99Thr/c.295C>A|363|Bsg25A|protein_coding|CODING|FBtr0077423|2|1),intron_variant(MODIFIER|||c.167-491G>T|919|CG11929|protein_coding|CODING|FBtr0077377|2|1),intron_variant(MODIFIER|||c.164-491G>T|918|CG11929|protein_coding|CODING|FBtr0343222|2|1)
2L	4776415	.	G	A	30	PASS	EFF=intron_variant(MODIFIER|||c.43+17223C>T|450|CG15630|protein_coding|CODING|FBtr0077418|1|1)
2L	4819436	.	G	A	30	PASS	EFF=intergenic_region(MODIFIER||||||||||1)
2L	4870953	.	T	C	30	PASS	EFF=intron_variant(MODIFIER|||c.1127+117T>C|790|pog|protein_coding|CODING|FBtr0077388|5|1),intron_variant(MODIFIER|||c.1127+117T>C|944|pog|protein_coding|CODING|FBtr0100301|5|1),intron_variant(MODIFIER|||c.1127+117T>C|951|pog|protein_coding|CODING|FBtr0304909|5|1),intron_variant(MODIFIER|||c.1127+117T>C|894|pog|protein_coding|CODING|FBtr0304910|5|1),intron_variant(MODIFIER|||c.1127+117T>C|926|pog…
2L	4870954	.	A	G	30	PASS	EFF=intron_variant(MODIFIER|||c.1127+118A>G|790|pog|protein_coding|CODING|FBtr0077388|5|1),intron_variant(MODIFIER|||c.1127+118A>G|944|pog|protein_coding|CODING|FBtr0100301|5|1),intron_variant(MODIFIER|||c.1127+118A>G|951|pog|protein_coding|CODING|FBtr0304909|5|1),intron_variant(MODIFIER|||c.1127+118A>G|894|pog|protein_coding|CODING|FBtr0304910|5|1),intron_variant(MODIFIER|||c.1127+118A>G|926|pog…
2L	5047193	.	C	T	30	PASS	EFF=synonymous_variant(LOW|SILENT|ggC/ggT|p.Gly30Gly/c.90C>T|181|CG44001|protein_coding|CODING|FBtr0334128|3|1),synonymous_variant(LOW|SILENT|ggC/ggT|p.Gly30Gly/c.90C>T|181|CG44001|protein_coding|CODING|FBtr0334127|4|1),synonymous_variant(LOW|SILENT|ggC/ggT|p.Gly30Gly/c.90C>T|181|CG44001|protein_coding|CODING|FBtr0334124|4|1),synonymous_variant(LOW|SILENT|ggC/ggT|p.Gly30Gly/c.90C>T|181|CG44001|pr…
2L	5047196	.	T	C	30	PASS	EFF=synonymous_variant(LOW|SILENT|atT/atC|p.Ile31Ile/c.93T>C|181|CG44001|protein_coding|CODING|FBtr0334128|3|1),synonymous_variant(LOW|SILENT|atT/atC|p.Ile31Ile/c.93T>C|181|CG44001|protein_coding|CODING|FBtr0334127|4|1),synonymous_variant(LOW|SILENT|atT/atC|p.Ile31Ile/c.93T>C|181|CG44001|protein_coding|CODING|FBtr0334124|4|1),synonymous_variant(LOW|SILENT|atT/atC|p.Ile31Ile/c.93T>C|181|CG44001|pr…
2L	5140633	.	T	C	30	PASS	EFF=synonymous_variant(LOW|SILENT|gaT/gaC|p.Asp6540Asp/c.19620T>C|8382|Msp300|protein_coding|CODING|FBtr0303383|9|1),synonymous_variant(LOW|SILENT|gaT/gaC|p.Asp2213Asp/c.6639T>C|7962|Msp300|protein_coding|CODING|FBtr0332403|11|1),synonymous_variant(LOW|SILENT|gaT/gaC|p.Asp6181Asp/c.18543T>C|11917|Msp300|protein_coding|CODING|FBtr0332404|10|1),synonymous_variant(LOW|SILENT|gaT/gaC|p.Asp6540Asp/c.1…
2L	5160836	.	T	G	30	PASS	EFF=synonymous_variant(LOW|SILENT|tcT/tcG|p.Ser1165Ser/c.3495T>G|6685|Msp300|protein_coding|CODING|FBtr0332406|6|1),synonymous_variant(LOW|SILENT|tcT/tcG|p.Ser1165Ser/c.3495T>G|13540|Msp300|protein_coding|CODING|FBtr0303387|6|1),synonymous_variant(LOW|SILENT|tcT/tcG|p.Ser1165Ser/c.3495T>G|9606|Msp300|protein_coding|CODING|FBtr0303384|6|1),intron_variant(MODIFIER|||c.25038+4987T>G|12345|Msp300|pro…
2L	5362290	.	A	T	30	PASS	EFF=intron_variant(MODIFIER|||c.4466-293A>T|1619|nompC|protein_coding|CODING|FBtr0079074|12|1),intron_variant(MODIFIER|||c.4466-293A>T|1732|nompC|protein_coding|CODING|FBtr0304843|12|1),intron_variant(MODIFIER|||c.4466-293A>T|1735|nompC|protein_coding|CODING|FBtr0343224|12|1),intron_variant(MODIFIER|||c.4677+81A>T|1726|nompC|protein_coding|CODING|FBtr0300012|13|1)
2L	5914023	.	T	A	30	PASS	EFF=synonymous_variant(LOW||ctA/ctA|p.Leu1303Leu/c.3909T>A|3489|bchs|protein_coding|CODING|FBtr0079144|8|1|WARNING_REF_DOES_NOT_MATCH_GENOME)
2L	5914140	.	A	G	30	PASS	EFF=intron_variant(MODIFIER|||c.4001+25A>G|3489|bchs|protein_coding|CODING|FBtr0079144|8|1)
2L	6446495	.	A	G	30	PASS	EFF=synonymous_variant(LOW|SILENT|Ttg/Ctg|p.Leu329Leu/c.985T>C|703|CG9527|protein_coding|CODING|FBtr0089948|5|1),synonymous_variant(LOW|SILENT|Ttg/Ctg|p.Leu350Leu/c.1048T>C|724|CG9527|protein_coding|CODING|FBtr0114603|4|1),synonymous_variant(LOW|SILENT|Ttg/Ctg|p.Leu329Leu/c.985T>C|703|CG9527|protein_coding|CODING|FBtr0345720|5|1),synonymous_variant(LOW|SILENT|Ttg/Ctg|p.Leu329Leu/c.985T>C|703|CG95…
2L	7710626	.	A	T	30	PASS	EFF=3_prime_UTR_variant(MODIFIER||112|c.*112A>T|1469|Tep3|protein_coding|CODING|FBtr0079477|15|1|WARNING_REF_DOES_NOT_MATCH_GENOME),upstream_gene_variant(MODIFIER||254||590|Ntl|protein_coding|CODING|FBtr0079478||1),upstream_gene_variant(MODIFIER||170|||CR44990||NON_CODING|FBtr0344056||1),upstream_gene_variant(MODIFIER||850|||tRNA:Y1:28C||NON_CODING|FBtr0089297||1),upstream_gene_variant(MODIFIER||…
2L	8847643	.	C	T	30	PASS	EFF=intergenic_region(MODIFIER||||||||||1)
2L	9965356	.	C	T	30	PASS	EFF=intron_variant(MODIFIER|||c.1419+20G>A|709|Dref|protein_coding|CODING|FBtr0079889|2|1),intron_variant(MODIFIER|||c.1419+20G>A|709|Dref|protein_coding|CODING|FBtr0310483|2|1)
2L	12128387	.	C	G	30	PASS	EFF=missense_variant(MODERATE|MISSENSE|gCa/gGa|p.Ala976Gly/c.2927C>G|1354|CG17211|protein_coding|CODING|FBtr0080336|5|1)
2L	12755063	.	A	C	30	PASS	EFF=intergenic_region(MODIFIER||||||||||1)
2L	17496126	.	C	T	30	PASS	EFF=upstream_gene_variant(MODIFIER||885|||CR45715||NON_CODING|FBtr0346495||1),intron_variant(MODIFIER|||c.27+609G>A|887|qua|protein_coding|CODING|FBtr0080996|1|1)
2L	19246324	.	A	T	30	PASS	EFF=intergenic_region(MODIFIER||||||||||1)
2R	5698692	.	A	T	30	PASS	EFF=missense_variant(MODERATE|MISSENSE|gAc/gTc|p.Asp92Val/c.275A>T|478|CG17337|protein_coding|CODING|FBtr0086038|2|1),missense_variant(MODERATE|MISSENSE|gAc/gTc|p.Asp45Val/c.134A>T|431|CG17337|protein_coding|CODING|FBtr0345358|1|1)
2R	7432534	.	C	T	30	PASS	EFF=upstream_gene_variant(MODIFIER||38|||CR44204||NON_CODING|FBtr0344615||1),intron_variant(MODIFIER|||c.840-1187C>T|416|so|protein_coding|CODING|FBtr0088970|6|1)
2R	7471274	.	G	T	30	PASS	EFF=intron_variant(MODIFIER|||c.78-392C>A|498|Aldh-III|protein_coding|CODING|FBtr0088993|2|1),intron_variant(MODIFIER|||c.78-392C>A|497|Aldh-III|protein_coding|CODING|FBtr0088996|3|1),intron_variant(MODIFIER|||c.78-392C>A|498|Aldh-III|protein_coding|CODING|FBtr0300477|3|1),intron_variant(MODIFIER|||c.78-392C>A|498|Aldh-III|protein_coding|CODING|FBtr0300478|3|1),intron_variant(MODIFIER|||c.78-392C…
2R	7920992	.	C	T	30	PASS	EFF=synonymous_variant(LOW|SILENT|aaG/aaA|p.Lys398Lys/c.1194G>A|403|Or43b|protein_coding|CODING|FBtr0088887|3|1),3_prime_UTR_variant(MODIFIER||587|c.*587C>T|774|Cul1|protein_coding|CODING|FBtr0088846|4|1),downstream_gene_variant(MODIFIER||94||774|Cul1|protein_coding|CODING|FBtr0088845||1),downstream_gene_variant(MODIFIER||94||774|Cul1|protein_coding|CODING|FBtr0088847||1),downstream_gene_variant(…
2R	7930936	.	C	A	30	PASS	EFF=5_prime_UTR_variant(MODIFIER||60|c.-60G>T|237|CG30381|protein_coding|CODING|FBtr0113374|1|1),5_prime_UTR_variant(MODIFIER||60|c.-60G>T|243|CG30381|protein_coding|CODING|FBtr0339129|1|1),downstream_gene_variant(MODIFIER||118||333|rnh1|protein_coding|CODING|FBtr0088883||1),downstream_gene_variant(MODIFIER||118||314|rnh1|protein_coding|CODING|FBtr0088884||1)
2R	7930937	.	C	T	30	PASS	EFF=5_prime_UTR_variant(MODIFIER||61|c.-61G>A|237|CG30381|protein_coding|CODING|FBtr0113374|1|1),5_prime_UTR_variant(MODIFIER||61|c.-61G>A|243|CG30381|protein_coding|CODING|FBtr0339129|1|1),downstream_gene_variant(MODIFIER||117||333|rnh1|protein_coding|CODING|FBtr0088883||1),downstream_gene_variant(MODIFIER||117||314|rnh1|protein_coding|CODING|FBtr0088884||1)
2R	7935906	.	C	T	30	PASS	EFF=synonymous_variant(LOW|SILENT|ttC/ttT|p.Phe1111Phe/c.3333C>T|1327|drosha|protein_coding|CODING|FBtr0088850|2|1),downstream_gene_variant(MODIFIER||960||556|CG8728|protein_coding|CODING|FBtr0088882||1)
2R	10265656	.	C	T	30	PASS	EFF=upstream_gene_variant(MODIFIER||415||466|CG12910|protein_coding|CODING|FBtr0310142||1),intron_variant(MODIFIER|||c.102+425C>T|464|CG12910|protein_coding|CODING|FBtr0310141|1|1)
2R	10318910	.	C	T	30	PASS	EFF=synonymous_variant(LOW|SILENT|tgC/tgT|p.Cys760Cys/c.2280C>T|1350|Ndg|protein_coding|CODING|FBtr0088349|5|1),synonymous_variant(LOW|SILENT|tgC/tgT|p.Cys760Cys/c.2280C>T|1350|Ndg|protein_coding|CODING|FBtr0339459|5|1),downstream_gene_variant(MODIFIER||934||101|CG34222|protein_coding|CODING|FBtr0112415||1)
2R	10618988	.	T	A	30	PASS	EFF=intron_variant(MODIFIER|||c.-151-903T>A|713|CG11883|protein_coding|CODING|FBtr0088283|1|1),intron_variant(MODIFIER|||c.-151-903T>A|732|CG11883|protein_coding|CODING|FBtr0088284|1|1),intron_variant(MODIFIER|||c.-122-903T>A|792|CG11883|protein_coding|CODING|FBtr0339461|1|1)
2R	10620127	.	T	G	30	PASS	EFF=intron_variant(MODIFIER|||c.-14+128T>G|792|CG11883|protein_coding|CODING|FBtr0339461|2|1),intron_variant(MODIFIER|||c.-43+128T>G|713|CG11883|protein_coding|CODING|FBtr0088283|2|1),intron_variant(MODIFIER|||c.-43+128T>G|732|CG11883|protein_coding|CODING|FBtr0088284|2|1)
2R	10620269	.	C	A	30	PASS	EFF=intron_variant(MODIFIER|||c.-14+270C>A|792|CG11883|protein_coding|CODING|FBtr0339461|2|1),intron_variant(MODIFIER|||c.-43+270C>A|713|CG11883|protein_coding|CODING|FBtr0088283|2|1),intron_variant(MODIFIER|||c.-43+270C>A|732|CG11883|protein_coding|CODING|FBtr0088284|2|1)
2R	10620271	.	T	A	30	PASS	EFF=intron_variant(MODIFIER|||c.-14+272T>A|792|CG11883|protein_coding|CODING|FBtr0339461|2|1),intron_variant(MODIFIER|||c.-43+272T>A|713|CG11883|protein_coding|CODING|FBtr0088283|2|1),intron_variant(MODIFIER|||c.-43+272T>A|732|CG11883|protein_coding|CODING|FBtr0088284|2|1)
2R	10841448	.	A	C	30	PASS	EFF=missense_variant(MODERATE|MISSENSE|gaT/gaG|p.Asp948Glu/c.2844T>G|1462|CG30015|protein_coding|CODING|FBtr0088243|8|1),missense_variant(MODERATE|MISSENSE|gaT/gaG|p.Asp996Glu/c.2988T>G|1510|CG30015|protein_coding|CODING|FBtr0113356|9|1),missense_variant(MODERATE|MISSENSE|gaT/gaG|p.Asp948Glu/c.2844T>G|1462|CG30015|protein_coding|CODING|FBtr0088242|8|1),missense_variant(MODERATE|MISSENSE|gaT/gaG|p…
2R	10844318	.	A	G	30	PASS	EFF=upstream_gene_variant(MODIFIER||291||1170|CG30015|protein_coding|CODING|FBtr0113357||1),intron_variant(MODIFIER|||c.940-807T>C|1462|CG30015|protein_coding|CODING|FBtr0088242|5|1),intron_variant(MODIFIER|||c.940-807T>C|1462|CG30015|protein_coding|CODING|FBtr0088243|5|1),intron_variant(MODIFIER|||c.979-807T>C|1475|CG30015|protein_coding|CODING|FBtr0331938|4|1),intron_variant(MODIFIER|||c.343-80…
2R	11237521	.	G	A	30	PASS	EFF=synonymous_variant(LOW|SILENT|aaC/aaT|p.Asn32Asn/c.96C>T|118|CG34224|protein_coding|CODING|FBtr0112417|1|1),upstream_gene_variant(MODIFIER||835||113|CG13217|protein_coding|CODING|FBtr0088194||1),downstream_gene_variant(MODIFIER||587||258|CG13216|protein_coding|CODING|FBtr0088193||1)
2R	11344856	.	T	G	30	PASS	EFF=synonymous_variant(LOW|SILENT|tcA/tcC|p.Ser79Ser/c.237A>C|256|alphaTry|protein_coding|CODING|FBtr0088161|1|1),downstream_gene_variant(MODIFIER||381||256|epsilonTry|protein_coding|CODING|FBtr0088160||1)
2R	11378564	.	T	A	30	PASS	EFF=intron_variant(MODIFIER|||c.64-318A>T|239|Tsp47F|protein_coding|CODING|FBtr0088151|1|1)
2R	12433861	.	A	G	30	PASS	EFF=intron_variant(MODIFIER|||c.1143-45T>C|852|DUBAI|protein_coding|CODING|FBtr0087950|3|1),intron_variant(MODIFIER|||c.1143-45T>C|852|DUBAI|protein_coding|CODING|FBtr0087951|2|1)
2R	12610803	.	G	C	30	PASS	EFF=intron_variant(MODIFIER|||c.1020+82G>C|373|Amph|protein_coding|CODING|FBtr0333100|8|1),intron_variant(MODIFIER|||c.1728+82G>C|602|Amph|protein_coding|CODING|FBtr0087828|9|1),intron_variant(MODIFIER|||c.1428+82G>C|502|Amph|protein_coding|CODING|FBtr0333099|9|1)
2R	14075066	.	C	T	30	PASS	EFF=intron_variant(MODIFIER|||c.169-4589G>A|1871|Prosap|protein_coding|CODING|FBtr0087601|3|1),intron_variant(MODIFIER|||c.169-4589G>A|1725|Prosap|protein_coding|CODING|FBtr0339763|3|1),intron_variant(MODIFIER|||c.169-4589G>A|1806|Prosap|protein_coding|CODING|FBtr0339764|3|1),intron_variant(MODIFIER|||c.169-4589G>A|1660|Prosap|protein_coding|CODING|FBtr0339765|3|1)
2R	14081711	.	C	T	30	PASS	EFF=intron_variant(MODIFIER|||c.168+10282G>A|1871|Prosap|protein_coding|CODING|FBtr0087601|3|1),intron_variant(MODIFIER|||c.168+10282G>A|1725|Prosap|protein_coding|CODING|FBtr0339763|3|1),intron_variant(MODIFIER|||c.168+10282G>A|1806|Prosap|protein_coding|CODING|FBtr0339764|3|1),intron_variant(MODIFIER|||c.168+10282G>A|1660|Prosap|protein_coding|CODING|FBtr0339765|3|1)
2R	14229842	.	C	G	30	PASS	EFF=3_prime_UTR_variant(MODIFIER||275|c.*275C>G|678|CG8468|protein_coding|CODING|FBtr0087532|4|1),3_prime_UTR_variant(MODIFIER||275|c.*275C>G|678|CG8468|protein_coding|CODING|FBtr0087533|4|1),3_prime_UTR_variant(MODIFIER||275|c.*275C>G|678|CG8468|protein_coding|CODING|FBtr0087534|3|1),downstream_gene_variant(MODIFIER||769||933|Opa1|protein_coding|CODING|FBtr0087573||1),downstream_gene_variant(MOD…
2R	15142617	.	A	G	30	PASS	EFF=synonymous_variant(LOW|SILENT|acA/acG|p.Thr831Thr/c.2493A>G|1108|chn|protein_coding|CODING|FBtr0087416|5|1),synonymous_variant(LOW|SILENT|acA/acG|p.Thr937Thr/c.2811A>G|1214|chn|protein_coding|CODING|FBtr0111006|6|1),synonymous_variant(LOW|SILENT|acA/acG|p.Thr940Thr/c.2820A>G|1217|chn|protein_coding|CODING|FBtr0305216|6|1),synonymous_variant(LOW|SILENT|acA/acG|p.Thr1009Thr/c.3027A>G|1286|chn|p…
2R	15876833	.	A	G	30	PASS	EFF=intron_variant(MODIFIER|||c.2384+198T>C|1480|sli|protein_coding|CODING|FBtr0330729|15|1),intron_variant(MODIFIER|||c.2384+198T>C|1469|sli|protein_coding|CODING|FBtr0330730|16|1),intron_variant(MODIFIER|||c.2456+198T>C|1504|sli|protein_coding|CODING|FBtr0330731|16|1),intron_variant(MODIFIER|||c.2384+198T>C|1480|sli|protein_coding|CODING|FBtr0330732|15|1),intron_variant(MODIFIER|||c.2456+198T>C…
2R	16309345	.	C	T	30	PASS	EFF=5_prime_UTR_premature_start_codon_gain_variant(LOW||||1340|Nox|protein_coding|CODING|FBtr0345378|1|1|WARNING_REF_DOES_NOT_MATCH_GENOME),5_prime_UTR_premature_start_codon_gain_variant(LOW||||1340|Nox|protein_coding|CODING|FBtr0345379|1|1|WARNING_REF_DOES_NOT_MATCH_GENOME),5_prime_UTR_premature_start_codon_gain_variant(LOW||||1282|Nox|protein_coding|CODING|FBtr0344889|1|1|WARNING_REF_DOES_NOT_M…
2R	16312109	.	T	G	30	PASS	EFF=intron_variant(MODIFIER|||c.747-121T>G|1340|Nox|protein_coding|CODING|FBtr0112650|2|1),intron_variant(MODIFIER|||c.747-121T>G|1282|Nox|protein_coding|CODING|FBtr0344889|2|1),intron_variant(MODIFIER|||c.747-121T>G|1340|Nox|protein_coding|CODING|FBtr0345378|2|1),intron_variant(MODIFIER|||c.747-121T>G|1340|Nox|protein_coding|CODING|FBtr0345379|2|1)
2R	16490129	.	T	A	30	PASS	EFF=upstream_gene_variant(MODIFIER||971||534|S-Lap8|protein_coding|CODING|FBtr0087087||1),downstream_gene_variant(MODIFIER||947||284|CG33459|protein_coding|CODING|FBtr0089859||1),intergenic_region(MODIFIER||||||||||1)
2R	17654750	.	C	T	30	PASS	EFF=intron_variant(MODIFIER|||c.-150-304G>A|499|CCHa1-R|protein_coding|CODING|FBtr0086893|1|1)
2R	17654752	.	A	T	30	PASS	EFF=intron_variant(MODIFIER|||c.-150-306T>A|499|CCHa1-R|protein_coding|CODING|FBtr0086893|1|1)
2R	17667311	.	G	T	30	PASS	EFF=missense_variant(MODERATE|MISSENSE|Gcc/Tcc|p.Ala395Ser/c.1183G>T|910|eIF3-S8|protein_coding|CODING|FBtr0340269|3|1),missense_variant(MODERATE|MISSENSE|Gcc/Tcc|p.Ala395Ser/c.1183G>T|910|eIF3-S8|protein_coding|CODING|FBtr0086836|3|1)
2R	17740555	.	C	T	30	PASS	EFF=synonymous_variant(LOW||gcT/gcT|p.Ala142Ala/c.426C>T|966|CG4996|protein_coding|CODING|FBtr0086864|3|1|WARNING_REF_DOES_NOT_MATCH_GENOME),upstream_gene_variant(MODIFIER||870||479|CG6401|protein_coding|CODING|FBtr0086882||1),upstream_gene_variant(MODIFIER||870||479|CG6401|protein_coding|CODING|FBtr0340278||1)
2R	17763988	.	A	T	30	PASS	EFF=synonymous_variant(LOW|SILENT|ctA/ctT|p.Leu562Leu/c.1686A>T|669|CG5009|protein_coding|CODING|FBtr0089548|7|1),downstream_gene_variant(MODIFIER||586||634|OstDelta|protein_coding|CODING|FBtr0089559||1),downstream_gene_variant(MODIFIER||586||633|OstDelta|protein_coding|CODING|FBtr0340276||1)
2R	17774708	.	C	G	30	PASS	EFF=intergenic_region(MODIFIER||||||||||1)
2R	17774709	.	G	C	30	PASS	EFF=intergenic_region(MODIFIER||||||||||1)
2R	17774734	.	C	T	30	PASS	EFF=intergenic_region(MODIFIER||||||||||1)
2R	17774988	.	T	C	30	PASS	EFF=intergenic_region(MODIFIER||||||||||1)
2R	17775011	.	G	A	30	PASS	EFF=intergenic_region(MODIFIER||||||||||1)
2R	18036188	.	G	C	30	PASS	EFF=intergenic_region(MODIFIER||||||||||1)
2R	18036300	.	G	A	30	PASS	EFF=intergenic_region(MODIFIER||||||||||1)
2R	18036320	.	C	G	30	PASS	EFF=intergenic_region(MODIFIER||||||||||1)
2R	18036323	.	T	C	30	PASS	EFF=intergenic_region(MODIFIER||||||||||1)
2R	18273921	.	T	C	30	PASS	EFF=intergenic_region(MODIFIER||||||||||1)
2R	18273933	.	A	G	30	PASS	EFF=intergenic_region(MODIFIER||||||||||1)
2R	18282188	.	T	A	30	PASS	EFF=intron_variant(MODIFIER|||c.5085-10A>T|2302|sbb|protein_coding|CODING|FBtr0301547|9|1),intron_variant(MODIFIER|||c.5115-10A>T|2312|sbb|protein_coding|CODING|FBtr0301550|8|1),intron_variant(MODIFIER|||c.5085-10A>T|2302|sbb|protein_coding|CODING|FBtr0301551|6|1),intron_variant(MODIFIER|||c.5115-10A>T|2330|sbb|protein_coding|CODING|FBtr0329997|7|1)
2R	18401415	.	T	C	30	PASS	EFF=missense_variant(MODERATE|MISSENSE|gTt/gCt|p.Val220Ala/c.659T>C|220|GstE3|protein_coding|CODING|FBtr0086671|1|1),upstream_gene_variant(MODIFIER||431|||CR43687||NON_CODING|FBtr0310489||1)
2R	18407224	.	C	A	30	PASS	EFF=synonymous_variant(LOW|SILENT|ctC/ctA|p.Leu90Leu/c.270C>A|223|GstE7|protein_coding|CODING|FBtr0086675|1|1),upstream_gene_variant(MODIFIER||610||222|GstE8|protein_coding|CODING|FBtr0086676||1),upstream_gene_variant(MODIFIER||610||222|GstE8|protein_coding|CODING|FBtr0345798||1),downstream_gene_variant(MODIFIER||463||222|GstE6|protein_coding|CODING|FBtr0086674||1)
2R	18408833	.	A	G	30	PASS	EFF=3_prime_UTR_variant(MODIFIER||305|c.*305A>G|222|GstE8|protein_coding|CODING|FBtr0345798|1|1|WARNING_REF_DOES_NOT_MATCH_GENOME),upstream_gene_variant(MODIFIER||215||221|GstE9|protein_coding|CODING|FBtr0086677||1),downstream_gene_variant(MODIFIER||242||222|GstE8|protein_coding|CODING|FBtr0086676||1),downstream_gene_variant(MODIFIER||963||273|imd|protein_coding|CODING|FBtr0086725||1),downstream_…
2R	18408869	.	T	G	30	PASS	EFF=3_prime_UTR_variant(MODIFIER||341|c.*341T>G|222|GstE8|protein_coding|CODING|FBtr0345798|1|1|WARNING_REF_DOES_NOT_MATCH_GENOME),upstream_gene_variant(MODIFIER||179||221|GstE9|protein_coding|CODING|FBtr0086677||1),downstream_gene_variant(MODIFIER||278||222|GstE8|protein_coding|CODING|FBtr0086676||1),downstream_gene_variant(MODIFIER||927||273|imd|protein_coding|CODING|FBtr0086725||1),downstream_…
2R	18696000	.	C	A	30	PASS	EFF=upstream_gene_variant(MODIFIER||585||206|CG15071|protein_coding|CODING|FBtr0086605||1),intron_variant(MODIFIER|||c.198+3138C>A|702|Sik3|protein_coding|CODING|FBtr0304024|2|1),intron_variant(MODIFIER|||c.198+3138C>A|1471|Sik3|protein_coding|CODING|FBtr0304025|2|1),intron_variant(MODIFIER|||c.198+3138C>A|1471|Sik3|protein_coding|CODING|FBtr0304026|2|1),intron_variant(MODIFIER|||c.198+3138C>A|14…
2R	19146355	.	A	G	30	PASS	EFF=intron_variant(MODIFIER|||c.-119+4001A>G|684|ena|protein_coding|CODING|FBtr0086582|1|1),intron_variant(MODIFIER|||c.-119+4001A>G|684|ena|protein_coding|CODING|FBtr0086583|2|1),intron_variant(MODIFIER|||c.-119+4001A>G|687|ena|protein_coding|CODING|FBtr0100174|2|1),intron_variant(MODIFIER|||c.-119+4001A>G|684|ena|protein_coding|CODING|FBtr0100176|2|1),intron_variant(MODIFIER|||c.-119+4001A>G|66…
2R	20570982	.	T	C	30	PASS	EFF=intron_variant(MODIFIER|||c.74-5481A>G|414|qsm|protein_coding|CODING|FBtr0086258|2|1),intron_variant(MODIFIER|||c.74-5481A>G|414|qsm|protein_coding|CODING|FBtr0342704|2|1)
2R	20672178	.	C	T	30	PASS	EFF=synonymous_variant(LOW|SILENT|ctC/ctT|p.Leu156Leu/c.468C>T|218|CG30152|protein_coding|CODING|FBtr0342718|3|1),synonymous_variant(LOW|SILENT|ctC/ctT|p.Leu156Leu/c.468C>T|218|CG30152|protein_coding|CODING|FBtr0345353|4|1),synonymous_variant(LOW|SILENT|ctC/ctT|p.Leu90Leu/c.270C>T|152|CG30152|protein_coding|CODING|FBtr0345354|3|1),synonymous_variant(LOW|SILENT|ctC/ctT|p.Leu156Leu/c.468C>T|218|CG3…
2R	20694980	.	G	A	30	PASS	EFF=intergenic_region(MODIFIER||||||||||1)
2R	21125008	.	A	T	30	PASS	EFF=intron_variant(MODIFIER|||c.1897-6T>A|926|CG4050|protein_coding|CODING|FBtr0071637|3|1),intron_variant(MODIFIER|||c.1897-6T>A|926|CG4050|protein_coding|CODING|FBtr0071638|3|1)
2R	21308864	.	G	T	30	PASS	EFF=missense_variant(MODERATE|MISSENSE|gGa/gTa|p.Gly1455Val/c.4364G>T|1498|CG42672|protein_coding|CODING|FBtr0302704|9|1),missense_variant(MODERATE|MISSENSE|gGa/gTa|p.Gly1597Val/c.4790G>T|1640|CG42672|protein_coding|CODING|FBtr0344188|10|1),missense_variant(MODERATE|MISSENSE|gGa/gTa|p.Gly1433Val/c.4298G>T|1476|CG42672|protein_coding|CODING|FBtr0302702|9|1),missense_variant(MODERATE|MISSENSE|gGa/g…
2R	21332947	.	T	C	30	PASS	EFF=synonymous_variant(LOW|SILENT|Ttg/Ctg|p.Leu1670Leu/c.5008T>C|3233|dom|protein_coding|CODING|FBtr0342890|11|1),synonymous_variant(LOW|SILENT|Ttg/Ctg|p.Leu1635Leu/c.4903T>C|2497|dom|protein_coding|CODING|FBtr0071604|10|1),synonymous_variant(LOW|SILENT|Ttg/Ctg|p.Leu1635Leu/c.4903T>C|3183|dom|protein_coding|CODING|FBtr0071602|10|1),synonymous_variant(LOW|SILENT|Ttg/Ctg|p.Leu1635Leu/c.4903T>C|3198…
2R	21825263	.	G	T	30	PASS	EFF=synonymous_variant(LOW||acA/acA|p.Thr1551Thr/c.4653C>A|2979|CG13492|protein_coding|CODING|FBtr0302446|4|1|WARNING_REF_DOES_NOT_MATCH_GENOME)
2R	21826289	.	G	A	30	PASS	EFF=synonymous_variant(LOW|SILENT|tcC/tcT|p.Ser1209Ser/c.3627C>T|2979|CG13492|protein_coding|CODING|FBtr0302446|4|1)
2R	22012648	.	C	T	30	PASS	EFF=intron_variant(MODIFIER|||c.140-7373G>A|952|CG34370|protein_coding|CODING|FBtr0299544|2|1),intron_variant(MODIFIER|||c.140-7373G>A|952|CG34370|protein_coding|CODING|FBtr0332252|2|1)
2R	22494286	.	C	A	30	PASS	EFF=3_prime_UTR_variant(MODIFIER||61|c.*61C>A|661|CG4610|protein_coding|CODING|FBtr0071834|1|1),downstream_gene_variant(MODIFIER||11||1916|px|protein_coding|CODING|FBtr0331942||1)
2R	23717487	.	T	A	30	PASS	EFF=intron_variant(MODIFIER|||c.-616+2588T>A|497|Sesn|protein_coding|CODING|FBtr0072087|2|1),intron_variant(MODIFIER|||c.-616+2588T>A|497|Sesn|protein_coding|CODING|FBtr0113113|2|1),intron_variant(MODIFIER|||c.-616+2588T>A|497|Sesn|protein_coding|CODING|FBtr0113114|2|1),intron_variant(MODIFIER|||c.-40+2588T>A|467|Sesn|protein_coding|CODING|FBtr0343268|2|1)
3L	695942	.	A	C	30	PASS	EFF=intron_variant(MODIFIER|||c.-123-950T>G|528|CG13894|protein_coding|CODING|FBtr0072606|1|1)
3L	785772	.	C	G	30	PASS	EFF=intergenic_region(MODIFIER||||||||||1)
3L	806074	.	C	A	30	PASS	EFF=intergenic_region(MODIFIER||||||||||1)
3L	814456	.	G	A	30	PASS	EFF=non_coding_exon_variant(MODIFIER|||n.1157G>A||CR44537||NON_CODING|FBtr0340687|1|1)
3L	814481	.	C	A	30	PASS	EFF=non_coding_exon_variant(MODIFIER|||n.1182C>A||CR44537||NON_CODING|FBtr0340687|1|1)
3L	1026634	.	A	G	30	PASS	EFF=synonymous_variant(LOW||atC/atC|p.Ile867Ile/c.2601T>C|2263|trio|protein_coding|CODING|FBtr0072645|4|1|WARNING_REF_DOES_NOT_MATCH_GENOME),synonymous_variant(LOW||atC/atC|p.Ile867Ile/c.2601T>C|2263|trio|protein_coding|CODING|FBtr0072644|4|1|WARNING_REF_DOES_NOT_MATCH_GENOME)
3L	1059626	.	G	C	30	PASS	EFF=intron_variant(MODIFIER|||c.1537-19272C>G|977|bab1|protein_coding|CODING|FBtr0072642|1|1),intron_variant(MODIFIER|||c.1537-19272C>G|970|bab1|protein_coding|CODING|FBtr0333268|1|1),intron_variant(MODIFIER|||c.1537-19272C>G|971|bab1|protein_coding|CODING|FBtr0333269|1|1),intron_variant(MODIFIER|||c.1537-19272C>G|976|bab1|protein_coding|CODING|FBtr0333270|1|1)
3L	1813648	.	C	A	30	PASS	EFF=intron_variant(MODIFIER|||c.3+964C>A|293|GV1|protein_coding|CODING|FBtr0072784|2|1),intron_variant(MODIFIER|||c.3+964C>A|180|GV1|protein_coding|CODING|FBtr0072785|2|1)
3L	4113583	.	A	G	30	PASS	EFF=synonymous_variant(LOW|SILENT|caA/caG|p.Gln1006Gln/c.3018A>G|1073|Ack|protein_coding|CODING|FBtr0073211|3|1),downstream_gene_variant(MODIFIER||706||188|Chd64|protein_coding|CODING|FBtr0073270||1),downstream_gene_variant(MODIFIER||706||175|Chd64|protein_coding|CODING|FBtr0310531||1)
3L	13964528	.	A	G	30	PASS	EFF=synonymous_variant(LOW|SILENT|ctT/ctC|p.Leu34Leu/c.102T>C|583|Meics|protein_coding|CODING|FBtr0075791|1|1),synonymous_variant(LOW|SILENT|ctT/ctC|p.Leu34Leu/c.102T>C|571|Meics|protein_coding|CODING|FBtr0333030|1|1),upstream_gene_variant(MODIFIER||675||982|ssp2|protein_coding|CODING|FBtr0075759||1),upstream_gene_variant(MODIFIER||675||559|Nxf3|protein_coding|CODING|FBtr0333073||1),upstream_gene…
3L	14048765	.	C	T	30	PASS	EFF=synonymous_variant(LOW|SILENT|agG/agA|p.Arg263Arg/c.789G>A|1780|blue|protein_coding|CODING|FBtr0075781|3|1)
3L	14226025	.	G	A	30	PASS	EFF=synonymous_variant(LOW|SILENT|acG/acA|p.Thr113Thr/c.339G>A|541|nuf|protein_coding|CODING|FBtr0306622|2|1),synonymous_variant(LOW|SILENT|acG/acA|p.Thr113Thr/c.339G>A|541|nuf|protein_coding|CODING|FBtr0306623|2|1),synonymous_variant(LOW|SILENT|acG/acA|p.Thr113Thr/c.339G>A|528|nuf|protein_coding|CODING|FBtr0100044|2|1),synonymous_variant(LOW|SILENT|acG/acA|p.Thr113Thr/c.339G>A|528|nuf|protein_co…
3L	15045823	.	A	G	30	PASS	EFF=intron_variant(MODIFIER|||c.174+2909T>C|546|Sytbeta|protein_coding|CODING|FBtr0299848|2|1)
3L	16338153	.	G	C	30	PASS	EFF=upstream_gene_variant(MODIFIER||850||891|CG4998|protein_coding|CODING|FBtr0075377||1),upstream_gene_variant(MODIFIER||850||1185|CG4998|protein_coding|CODING|FBtr0110866||1),intergenic_region(MODIFIER||||||||||1)
3L	18919443	.	T	G	30	PASS	EFF=synonymous_variant(LOW|SILENT|acA/acC|p.Thr250Thr/c.750A>C|322|CG18223|protein_coding|CODING|FBtr0075071|3|1),3_prime_UTR_variant(MODIFIER||561|c.*457A>C|98|CG18223|protein_coding|CODING|FBtr0333711|3|1),downstream_gene_variant(MODIFIER||184||430|CG6839|protein_coding|CODING|FBtr0075069||1),downstream_gene_variant(MODIFIER||987||423|CG3819|protein_coding|CODING|FBtr0333710||1)
3L	18990531	.	C	T	30	PASS	EFF=3_prime_UTR_variant(MODIFIER||296|c.*296G>A|636|CG18135|protein_coding|CODING|FBtr0075043|2|1),3_prime_UTR_variant(MODIFIER||296|c.*296G>A|653|CG18135|protein_coding|CODING|FBtr0075042|2|1),3_prime_UTR_variant(MODIFIER||296|c.*296G>A|770|CG18135|protein_coding|CODING|FBtr0075045|1|1),3_prime_UTR_variant(MODIFIER||296|c.*296G>A|711|CG18135|protein_coding|CODING|FBtr0075044|2|1),3_prime_UTR_var…
3L	22435795	.	C	T	30	PASS	EFF=intergenic_region(MODIFIER||||||||||1)
3R	4659836	.	G	A	30	PASS	EFF=5_prime_UTR_variant(MODIFIER||37596|c.-573G>A|1372|CG43427|protein_coding|CODING|FBtr0308851|1|1),5_prime_UTR_variant(MODIFIER||37596|c.-1269G>A|1541|CG43427|protein_coding|CODING|FBtr0308857|1|1),5_prime_UTR_variant(MODIFIER||37596|c.-918G>A|1501|CG43427|protein_coding|CODING|FBtr0308858|1|1),5_prime_UTR_variant(MODIFIER||37596|c.-918G>A|1372|CG43427|protein_coding|CODING|FBtr0308850|1|1),do…
3R	5963658	.	T	C	30	PASS	EFF=intergenic_region(MODIFIER||||||||||1)
3R	9946044	.	G	A	30	PASS	EFF=downstream_gene_variant(MODIFIER||878||137|Glut4EF|protein_coding|CODING|FBtr0114583||1),downstream_gene_variant(MODIFIER||871||300|Glut4EF|protein_coding|CODING|FBtr0114581||1),intron_variant(MODIFIER|||c.1056+2150G>A|361|Glut4EF|protein_coding|CODING|FBtr0114582|4|1),intron_variant(MODIFIER|||c.1056+2150G>A|741|Glut4EF|protein_coding|CODING|FBtr0112576|4|1),intron_variant(MODIFIER|||c.396+2…
3R	9997011	.	C	T	30	PASS	EFF=upstream_gene_variant(MODIFIER||152||640|Spn85F|protein_coding|CODING|FBtr0082171||1),upstream_gene_variant(MODIFIER||222||397|Gr85a|protein_coding|CODING|FBtr0082216||1),intergenic_region(MODIFIER||||||||||1)
3R	10515549	.	G	A	30	PASS	EFF=intron_variant(MODIFIER|||c.1168-1205C>T|487|hth|protein_coding|CODING|FBtr0082255|11|1),intron_variant(MODIFIER|||c.1123-1205C>T|472|hth|protein_coding|CODING|FBtr0082256|11|1)
3R	11810592	.	A	G	30	PASS	EFF=5_prime_UTR_variant(MODIFIER||52|c.-52T>C|1018|ClC-a|protein_coding|CODING|FBtr0300622|2|1),5_prime_UTR_variant(MODIFIER||52|c.-52T>C|220|ClC-a|protein_coding|CODING|FBtr0334891|2|1),5_prime_UTR_variant(MODIFIER||52|c.-52T>C|1145|ClC-a|protein_coding|CODING|FBtr0301023|2|1)
3R	11870550	.	A	T	30	PASS	EFF=intergenic_region(MODIFIER||||||||||1)
3R	11917620	.	G	A	30	PASS	EFF=intron_variant(MODIFIER|||c.-9+720C>T|1975|Cad87A|protein_coding|CODING|FBtr0082513|3|1)
3R	14271722	.	G	A	30	PASS	EFF=synonymous_variant(LOW||acT/acT|p.Thr1533Thr/c.4599C>T|3726|trx|protein_coding|CODING|FBtr0082950|5|1|WARNING_REF_DOES_NOT_MATCH_GENOME),synonymous_variant(LOW||acT/acT|p.Thr1165Thr/c.3495C>T|3358|trx|protein_coding|CODING|FBtr0100277|4|1|WARNING_REF_DOES_NOT_MATCH_GENOME),synonymous_variant(LOW||acT/acT|p.Thr1533Thr/c.4599C>T|3726|trx|protein_coding|CODING|FBtr0082947|6|1|WARNING_REF_DOES_NO…
3R	14307257	.	C	T	30	PASS	EFF=synonymous_variant(LOW|SILENT|caG/caA|p.Gln233Gln/c.699G>A|941|su_Hw_|protein_coding|CODING|FBtr0082945|2|1),synonymous_variant(LOW|SILENT|caG/caA|p.Gln233Gln/c.699G>A|941|su_Hw_|protein_coding|CODING|FBtr0082946|2|1),synonymous_variant(LOW|SILENT|caG/caA|p.Gln233Gln/c.699G>A|941|su_Hw_|protein_coding|CODING|FBtr0310002|3|1)
3R	14722500	.	C	T	30	PASS	EFF=intron_variant(MODIFIER|||c.263+811G>A|1288|kibra|protein_coding|CODING|FBtr0100008|1|1),intron_variant(MODIFIER|||c.263+811G>A|1288|kibra|protein_coding|CODING|FBtr0344383|1|1)
3R	14723815	.	G	A	30	PASS	EFF=5_prime_UTR_variant(MODIFIER||242|c.-242C>T|1288|kibra|protein_coding|CODING|FBtr0344383|1|1),5_prime_UTR_variant(MODIFIER||242|c.-242C>T|1288|kibra|protein_coding|CODING|FBtr0100008|1|1),downstream_gene_variant(MODIFIER||945||351|CG7530|protein_coding|CODING|FBtr0083019||1),downstream_gene_variant(MODIFIER||945||351|CG7530|protein_coding|CODING|FBtr0083020||1),downstream_gene_variant(MODIFIE…
3R	15092408	.	A	C	30	PASS	EFF=intron_variant(MODIFIER|||c.60+2459T>G|664|CG6966|protein_coding|CODING|FBtr0113236|1|1),intron_variant(MODIFIER|||c.60+2459T>G|664|CG6966|protein_coding|CODING|FBtr0344380|1|1)
3R	15235032	.	T	C	30	PASS	EFF=synonymous_variant(LOW|SILENT|ttA/ttG|p.Leu1975Leu/c.5925A>G|2767|tefu|protein_coding|CODING|FBtr0110874|23|1)
3R	15264203	.	A	T	30	PASS	EFF=upstream_gene_variant(MODIFIER||745||635|Su_var_3-9|protein_coding|CODING|FBtr0310385||1),upstream_gene_variant(MODIFIER||745||475|eIF-2gamma|protein_coding|CODING|FBtr0310386||1),upstream_gene_variant(MODIFIER||745||475|eIF-2gamma|protein_coding|CODING|FBtr0337054||1),intron_variant(MODIFIER|||c.259-150A>T|269|Set|protein_coding|CODING|FBtr0083062|1|1)
3R	15268052	.	G	C	30	PASS	EFF=missense_variant(MODERATE|MISSENSE|atC/atG|p.Ile86Met/c.258C>G|526|CG14864|protein_coding|CODING|FBtr0110811|2|1),missense_variant(MODERATE|MISSENSE|atC/atG|p.Ile107Met/c.321C>G|547|CG14864|protein_coding|CODING|FBtr0083128|1|1),upstream_gene_variant(MODIFIER||610||366|Zip88E|protein_coding|CODING|FBtr0290018||1)
3R	15268795	.	G	A	30	PASS	EFF=synonymous_variant(LOW|SILENT|gaG/gaA|p.Glu11Glu/c.33G>A|366|Zip88E|protein_coding|CODING|FBtr0290018|1|1),upstream_gene_variant(MODIFIER||366||547|CG14864|protein_coding|CODING|FBtr0083128||1),upstream_gene_variant(MODIFIER||257||526|CG14864|protein_coding|CODING|FBtr0110811||1)
3R	15268943	.	G	A	30	PASS	EFF=missense_variant(MODERATE|MISSENSE|Gca/Aca|p.Ala61Thr/c.181G>A|366|Zip88E|protein_coding|CODING|FBtr0290018|1|1),upstream_gene_variant(MODIFIER||514||547|CG14864|protein_coding|CODING|FBtr0083128||1),upstream_gene_variant(MODIFIER||405||526|CG14864|protein_coding|CODING|FBtr0110811||1)
3R	15268969	.	G	A	30	PASS	EFF=synonymous_variant(LOW|SILENT|gcG/gcA|p.Ala69Ala/c.207G>A|366|Zip88E|protein_coding|CODING|FBtr0290018|1|1),upstream_gene_variant(MODIFIER||540||547|CG14864|protein_coding|CODING|FBtr0083128||1),upstream_gene_variant(MODIFIER||431||526|CG14864|protein_coding|CODING|FBtr0110811||1)
3R	15462738	.	T	G	30	PASS	EFF=intron_variant(MODIFIER|||c.93+266A>C|1585|AdamTS-A|protein_coding|CODING|FBtr0334629|1|1),intron_variant(MODIFIER|||c.402+12149A>C|1688|AdamTS-A|protein_coding|CODING|FBtr0083160|1|1)
3R	15888395	.	A	G	30	PASS	EFF=downstream_gene_variant(MODIFIER||799||254|CG14877|protein_coding|CODING|FBtr0083249||1),intergenic_region(MODIFIER||||||||||1)
3R	17092771	.	T	C	30	PASS	EFF=synonymous_variant(LOW||aaG/aaG|p.Lys1988Lys/c.5964A>G|2210|cher|protein_coding|CODING|FBtr0089471|15|1|WARNING_REF_DOES_NOT_MATCH_GENOME),synonymous_variant(LOW||aaG/aaG|p.Lys635Lys/c.1905A>G|857|cher|protein_coding|CODING|FBtr0290015|5|1|WARNING_REF_DOES_NOT_MATCH_GENOME),synonymous_variant(LOW||aaG/aaG|p.Lys616Lys/c.1848A>G|838|cher|protein_coding|CODING|FBtr0089473|4|1|WARNING_REF_DOES_NO…
3R	17127316	.	C	T	30	PASS	EFF=synonymous_variant(LOW|SILENT|caC/caT|p.His62His/c.186C>T|273|CG31269|protein_coding|CODING|FBtr0113401|1|1),upstream_gene_variant(MODIFIER||378||267|CG17477|protein_coding|CODING|FBtr0083418||1),upstream_gene_variant(MODIFIER||896||266|CG31265|protein_coding|CODING|FBtr0083402||1),non_coding_exon_variant(MODIFIER|||n.547G>A||CR44238||NON_CODING|FBtr0337099|1|1)
3R	17149663	.	T	G	30	PASS	EFF=upstream_gene_variant(MODIFIER||4||153|Det|protein_coding|CODING|FBtr0083408||1),upstream_gene_variant(MODIFIER||251||702|m-cup|protein_coding|CODING|FBtr0083414||1),upstream_gene_variant(MODIFIER||251||701|m-cup|protein_coding|CODING|FBtr0337043||1),upstream_gene_variant(MODIFIER||924||280|CG5285|protein_coding|CODING|FBtr0083409||1),intergenic_region(MODIFIER||||||||||1)
3R	18099360	.	G	A	30	PASS	EFF=intron_variant(MODIFIER|||c.808+2447G>A|1186|sr|protein_coding|CODING|FBtr0083542|3|1),intron_variant(MODIFIER|||c.808+2447G>A|1271|sr|protein_coding|CODING|FBtr0330050|3|1)
3R	18099364	.	G	T	30	PASS	EFF=intron_variant(MODIFIER|||c.808+2451G>T|1186|sr|protein_coding|CODING|FBtr0083542|3|1),intron_variant(MODIFIER|||c.808+2451G>T|1271|sr|protein_coding|CODING|FBtr0330050|3|1)
3R	18159628	.	T	C	30	PASS	EFF=downstream_gene_variant(MODIFIER||157||217|CG14315|protein_coding|CODING|FBtr0083547||1),non_coding_exon_variant(MODIFIER|||n.297A>G||CR45104||NON_CODING|FBtr0344671|1|1)
3R	18186897	.	A	T	30	PASS	EFF=synonymous_variant(LOW|SILENT|acA/acT|p.Thr340Thr/c.1020A>T|648|Arp5|protein_coding|CODING|FBtr0083557|2|1),synonymous_variant(LOW|SILENT|acA/acT|p.Thr340Thr/c.1020A>T|648|Arp5|protein_coding|CODING|FBtr0336468|2|1),downstream_gene_variant(MODIFIER||908||247|CG12321|protein_coding|CODING|FBtr0083616||1)
3R	18188186	.	G	A	30	PASS	EFF=synonymous_variant(LOW|SILENT|aaC/aaT|p.Asn140Asn/c.420C>T|247|CG12321|protein_coding|CODING|FBtr0083616|1|1),upstream_gene_variant(MODIFIER||886||642|MED17|protein_coding|CODING|FBtr0083558||1),downstream_gene_variant(MODIFIER||311||648|Arp5|protein_coding|CODING|FBtr0083557||1),downstream_gene_variant(MODIFIER||311||648|Arp5|protein_coding|CODING|FBtr0336468||1)
3R	20812637	.	T	C	30	PASS	EFF=missense_variant(MODERATE|MISSENSE|aAg/aGg|p.Lys942Arg/c.2825A>G|1478|Fancd2|protein_coding|CODING|FBtr0083995|11|1)
3R	20812645	.	A	T	30	PASS	EFF=synonymous_variant(LOW|SILENT|gtT/gtA|p.Val939Val/c.2817T>A|1478|Fancd2|protein_coding|CODING|FBtr0083995|11|1)
3R	22742298	.	C	T	30	PASS	EFF=synonymous_variant(LOW|SILENT|taC/taT|p.Tyr308Tyr/c.924C>T|501|CG6985|protein_coding|CODING|FBtr0084308|2|1),downstream_gene_variant(MODIFIER||656||691|vret|protein_coding|CODING|FBtr0084323||1)
3R	22749707	.	G	C	30	PASS	EFF=synonymous_variant(LOW|SILENT|acC/acG|p.Thr161Thr/c.483C>G|316|rumi|protein_coding|CODING|FBtr0310040|2|1),synonymous_variant(LOW|SILENT|acC/acG|p.Thr256Thr/c.768C>G|411|rumi|protein_coding|CODING|FBtr0084320|2|1),upstream_gene_variant(MODIFIER||651||397|CG31139|protein_coding|CODING|FBtr0084321||1),upstream_gene_variant(MODIFIER||651||312|CG31139|protein_coding|CODING|FBtr0339522||1)
3R	22749725	.	T	A	30	PASS	EFF=synonymous_variant(LOW|SILENT|ctA/ctT|p.Leu155Leu/c.465A>T|316|rumi|protein_coding|CODING|FBtr0310040|2|1),synonymous_variant(LOW|SILENT|ctA/ctT|p.Leu250Leu/c.750A>T|411|rumi|protein_coding|CODING|FBtr0084320|2|1),upstream_gene_variant(MODIFIER||669||397|CG31139|protein_coding|CODING|FBtr0084321||1),upstream_gene_variant(MODIFIER||669||312|CG31139|protein_coding|CODING|FBtr0339522||1)
3R	22749728	.	C	T	30	PASS	EFF=synonymous_variant(LOW|SILENT|gaG/gaA|p.Glu154Glu/c.462G>A|316|rumi|protein_coding|CODING|FBtr0310040|2|1),synonymous_variant(LOW|SILENT|gaG/gaA|p.Glu249Glu/c.747G>A|411|rumi|protein_coding|CODING|FBtr0084320|2|1),upstream_gene_variant(MODIFIER||672||397|CG31139|protein_coding|CODING|FBtr0084321||1),upstream_gene_variant(MODIFIER||672||312|CG31139|protein_coding|CODING|FBtr0339522||1)
3R	23753848	.	C	G	30	PASS	EFF=synonymous_variant(LOW|SILENT|ctC/ctG|p.Leu238Leu/c.714C>G|428|Rpt5|protein_coding|CODING|FBtr0084452|3|1),downstream_gene_variant(MODIFIER||775||819|Hrd3|protein_coding|CODING|FBtr0084467||1),downstream_gene_variant(MODIFIER||775||819|Hrd3|protein_coding|CODING|FBtr0321255||1)
3R	29891373	.	C	T	30	PASS	EFF=intron_variant(MODIFIER|||c.1440-5927C>T|730|CG31038|protein_coding|CODING|FBtr0085494|2|1),intron_variant(MODIFIER|||c.1440-5927C>T|605|CG31038|protein_coding|CODING|FBtr0085495|2|1),intron_variant(MODIFIER|||c.1440-5927C>T|605|CG31038|protein_coding|CODING|FBtr0085496|1|1),intron_variant(MODIFIER|||c.1440-5927C>T|730|CG31038|protein_coding|CODING|FBtr0085498|2|1)
3R	29930042	.	A	G	30	PASS	EFF=synonymous_variant(LOW|SILENT|ctT/ctC|p.Leu114Leu/c.342T>C|526|CG31202|protein_coding|CODING|FBtr0085510|1|1),downstream_gene_variant(MODIFIER||509||742|Cog7|protein_coding|CODING|FBtr0085509||1)
3R	29934175	.	G	T	30	PASS	EFF=downstream_gene_variant(MODIFIER||407||306|eIF2B-alpha|protein_coding|CODING|FBtr0085508||1),intergenic_region(MODIFIER||||||||||1)
3R	29942154	.	G	T	30	PASS	EFF=synonymous_variant(LOW|SILENT|ccG/ccT|p.Pro1898Pro/c.5694G>T|3731|CG15523|protein_coding|CODING|FBtr0085505|6|1)
3R	30142358	.	T	C	30	PASS	EFF=intron_variant(MODIFIER|||c.-337-3496A>G|774|AdoR|protein_coding|CODING|FBtr0085581|1|1),intron_variant(MODIFIER|||c.-337-3496A>G|772|AdoR|protein_coding|CODING|FBtr0334658|1|1)
X	4199323	.	A	G	30	PASS	EFF=intron_variant(MODIFIER|||c.70+3868T>C|873|Fas2|protein_coding|CODING|FBtr0070665|2|1),intron_variant(MODIFIER|||c.70+3868T>C|773|Fas2|protein_coding|CODING|FBtr0070666|2|1),intron_variant(MODIFIER|||c.70+3868T>C|811|Fas2|protein_coding|CODING|FBtr0070667|2|1),intron_variant(MODIFIER|||c.70+3868T>C|844|Fas2|protein_coding|CODING|FBtr0336882|2|1),intron_variant(MODIFIER|||c.70+3868T>C|859|Fas2…
X	4201230	.	A	C	30	PASS	EFF=intron_variant(MODIFIER|||c.70+1961T>G|873|Fas2|protein_coding|CODING|FBtr0070665|2|1),intron_variant(MODIFIER|||c.70+1961T>G|773|Fas2|protein_coding|CODING|FBtr0070666|2|1),intron_variant(MODIFIER|||c.70+1961T>G|811|Fas2|protein_coding|CODING|FBtr0070667|2|1),intron_variant(MODIFIER|||c.70+1961T>G|844|Fas2|protein_coding|CODING|FBtr0336882|2|1),intron_variant(MODIFIER|||c.70+1961T>G|859|Fas2…
X	5558698	.	A	G	30	PASS	EFF=intron_variant(MODIFIER|||c.553+712T>C|640|Vsx2|protein_coding|CODING|FBtr0100024|1|1),intron_variant(MODIFIER|||c.553+712T>C|645|Vsx2|protein_coding|CODING|FBtr0343015|1|1)
X	5631433	.	G	A	30	PASS	EFF=synonymous_variant(LOW|SILENT|aaC/aaT|p.Asn322Asn/c.966C>T|958|CG42492|protein_coding|CODING|FBtr0336690|11|1),synonymous_variant(LOW|SILENT|aaC/aaT|p.Asn341Asn/c.1023C>T|977|CG42492|protein_coding|CODING|FBtr0310285|13|1),synonymous_variant(LOW|SILENT|aaC/aaT|p.Asn284Asn/c.852C>T|916|CG42492|protein_coding|CODING|FBtr0300466|7|1),synonymous_variant(LOW|SILENT|aaC/aaT|p.Asn359Asn/c.1077C>T|99…
X	5787957	.	A	C	30	PASS	EFF=synonymous_variant(LOW|SILENT|atA/atC|p.Ile826Ile/c.2478A>C|897|CG42699|protein_coding|CODING|FBtr0302921|6|1)
X	5998809	.	T	C	30	PASS	EFF=synonymous_variant(LOW|SILENT|cgA/cgG|p.Arg257Arg/c.771A>G|368|CG4766|protein_coding|CODING|FBtr0070891|3|1)
X	5998834	.	T	A	30	PASS	EFF=intron_variant(MODIFIER|||c.758-12A>T|368|CG4766|protein_coding|CODING|FBtr0070891|2|1)
X	5998842	.	A	T	30	PASS	EFF=intron_variant(MODIFIER|||c.758-20T>A|368|CG4766|protein_coding|CODING|FBtr0070891|2|1)
X	5998847	.	T	G	30	PASS	EFF=intron_variant(MODIFIER|||c.758-25A>C|368|CG4766|protein_coding|CODING|FBtr0070891|2|1)
X	5998850	.	A	C	30	PASS	EFF=intron_variant(MODIFIER|||c.758-28T>G|368|CG4766|protein_coding|CODING|FBtr0070891|2|1)
X	6680011	.	A	C	30	PASS	EFF=upstream_gene_variant(MODIFIER||893||175|CG3192|protein_coding|CODING|FBtr0070990||1),intron_variant(MODIFIER|||c.219+54A>C|495|l_1_G0255|protein_coding|CODING|FBtr0070953|2|1),intron_variant(MODIFIER|||c.135+54A>C|467|l_1_G0255|protein_coding|CODING|FBtr0070954|2|1)
X	7107242	.	G	A	30	PASS	EFF=3_prime_UTR_variant(MODIFIER||139|c.*139C>T|705|fz4|protein_coding|CODING|FBtr0071017|4|1),3_prime_UTR_variant(MODIFIER||139|c.*139C>T|705|fz4|protein_coding|CODING|FBtr0071018|3|1),downstream_gene_variant(MODIFIER||897||185|CG8300|protein_coding|CODING|FBtr0071015||1)
X	7107288	.	G	C	30	PASS	EFF=3_prime_UTR_variant(MODIFIER||93|c.*93C>G|705|fz4|protein_coding|CODING|FBtr0071017|4|1),3_prime_UTR_variant(MODIFIER||93|c.*93C>G|705|fz4|protein_coding|CODING|FBtr0071018|3|1),downstream_gene_variant(MODIFIER||943||185|CG8300|protein_coding|CODING|FBtr0071015||1)
X	8342068	.	T	C	30	PASS	EFF=intron_variant(MODIFIER|||c.-738-11927A>G|795|nAChRalpha3|protein_coding|CODING|FBtr0289988|2|1),intron_variant(MODIFIER|||c.-738-11927A>G|795|nAChRalpha3|protein_coding|CODING|FBtr0339652|2|1)
dmel_mitochondrion_genome	10681	.	T	C	30	PASS	EFF=synonymous_variant(LOW||Cta/Cta|p.Leu62Leu/c.184T>C|379|mt:Cyt-b|protein_coding|CODING|FBtr0100884|1|1|WARNING_TRANSCRIPT_MULTIPLE_STOP_CODONS+WARNING_REF_DOES_NOT_MATCH_GENOME),upstream_gene_variant(MODIFIER||847||96|mt:ND4L|protein_coding|CODING|FBtr0100880||1|WARNING_TRANSCRIPT_MULTIPLE_STOP_CODONS),upstream_gene_variant(MODIFIER||718|||mt:tRNA:P||NON_CODING|FBtr0100882||1),upstream_gene_v…
dmel_mitochondrion_genome	12344	.	C	A	30	PASS	EFF=synonymous_variant(LOW||ggT/ggT|p.Gly105Gly/c.315G>T|312|mt:ND1|protein_coding|CODING|FBtr0100886|1|1|WARNING_TRANSCRIPT_MULTIPLE_STOP_CODONS+WARNING_REF_DOES_NOT_MATCH_GENOME),downstream_gene_variant(MODIFIER||707||379|mt:Cyt-b|protein_coding|CODING|FBtr0100884||1|WARNING_TRANSCRIPT_MULTIPLE_STOP_CODONS),downstream_gene_variant(MODIFIER||325|||mt:tRNA:L:CUN||NON_CODING|FBtr0100887||1),downst…
dmel_mitochondrion_genome	2661	.	C	T	30	PASS	EFF=synonymous_variant(LOW|SILENT|ccC/ccT|p.Pro396Pro/c.1188C>T|512|mt:CoI|protein_coding|CODING|FBtr0100861|1|1|WARNING_TRANSCRIPT_MULTIPLE_STOP_CODONS),upstream_gene_variant(MODIFIER||351|||mt:tRNA:L:UUR||NON_CODING|FBtr0100862||1),upstream_gene_variant(MODIFIER||422||228|mt:CoII|protein_coding|CODING|FBtr0100863||1|WARNING_TRANSCRIPT_INCOMPLETE)
dmel_mitochondrion_genome	3583	.	T	C	30	PASS	EFF=synonymous_variant(LOW|SILENT|gcT/gcC|p.Ala167Ala/c.501T>C|228|mt:CoII|protein_coding|CODING|FBtr0100863|1|1|WARNING_TRANSCRIPT_INCOMPLETE),upstream_gene_variant(MODIFIER||185|||mt:tRNA:K||NON_CODING|FBtr0100864||1),upstream_gene_variant(MODIFIER||257|||mt:tRNA:D||NON_CODING|FBtr0100865||1),upstream_gene_variant(MODIFIER||324||54|mt:ATPase8|protein_coding|CODING|FBtr0100866||1|WARNING_TRANSCR…
dmel_mitochondrion_genome	4247	.	C	T	30	PASS	EFF=synonymous_variant(LOW|SILENT|ggA/ggT|p.Gly62Gly/c.186C>T|225|mt:ATPase6|protein_coding|CODING|FBtr0100867|1|1|WARNING_TRANSCRIPT_MULTIPLE_STOP_CODONS+WARNING_REF_DOES_NOT_MATCH_GENOME),upstream_gene_variant(MODIFIER||489||263|mt:CoIII|protein_coding|CODING|FBtr0100868||1|WARNING_TRANSCRIPT_MULTIPLE_STOP_CODONS),downstream_gene_variant(MODIFIER||477||228|mt:CoII|protein_coding|CODING|FBtr0100…
dmel_mitochondrion_genome	5396	.	C	T	30	PASS	EFF=synonymous_variant(LOW||Tta/Tta|p.Leu221Leu/c.661C>T|263|mt:CoIII|protein_coding|CODING|FBtr0100868|1|1|WARNING_TRANSCRIPT_MULTIPLE_STOP_CODONS+WARNING_REF_DOES_NOT_MATCH_GENOME),upstream_gene_variant(MODIFIER||147|||mt:tRNA:G||NON_CODING|FBtr0100869||1),upstream_gene_variant(MODIFIER||212||118|mt:ND3|protein_coding|CODING|FBtr0100870||1|WARNING_TRANSCRIPT_MULTIPLE_STOP_CODONS),upstream_gene_…
dmel_mitochondrion_genome	6982	.	G	A	30	PASS	EFF=synonymous_variant(LOW||taT/taT|p.Tyr381Tyr/c.1143C>T|573|mt:ND5|protein_coding|CODING|FBtr0100877|1|1|WARNING_TRANSCRIPT_INCOMPLETE+WARNING_REF_DOES_NOT_MATCH_GENOME),upstream_gene_variant(MODIFIER||581|||mt:tRNA:F||NON_CODING|FBtr0100876||1),downstream_gene_variant(MODIFIER||937|||mt:tRNA:A||NON_CODING|FBtr0100871||1),downstream_gene_variant(MODIFIER||864|||mt:tRNA:R||NON_CODING|FBtr0100872…
dmel_mitochondrion_genome	7870	.	G	A	30	PASS	EFF=synonymous_variant(LOW|SILENT|ttC/ttT|p.Phe85Phe/c.255C>T|573|mt:ND5|protein_coding|CODING|FBtr0100877|1|1|WARNING_TRANSCRIPT_INCOMPLETE),downstream_gene_variant(MODIFIER||270|||mt:tRNA:H||NON_CODING|FBtr0100878||1),downstream_gene_variant(MODIFIER||336||445|mt:ND4|protein_coding|CODING|FBtr0100879||1|WARNING_TRANSCRIPT_INCOMPLETE)
dmel_mitochondrion_genome	8267	.	C	A	30	PASS	EFF=missense_variant(MODERATE|MISSENSE|ttG/ttT|p.Leu426Phe/c.1278G>T|445|mt:ND4|protein_coding|CODING|FBtr0100879|1|1|WARNING_TRANSCRIPT_INCOMPLETE),upstream_gene_variant(MODIFIER||143||573|mt:ND5|protein_coding|CODING|FBtr0100877||1|WARNING_TRANSCRIPT_INCOMPLETE),upstream_gene_variant(MODIFIER||62|||mt:tRNA:H||NON_CODING|FBtr0100878||1)
dmel_mitochondrion_genome	8826	.	A	G	30	PASS	EFF=missense_variant(MODERATE|MISSENSE|tTa/tCa|p.Leu240Ser/c.719T>C|445|mt:ND4|protein_coding|CODING|FBtr0100879|1|1|WARNING_TRANSCRIPT_INCOMPLETE),upstream_gene_variant(MODIFIER||702||573|mt:ND5|protein_coding|CODING|FBtr0100877||1|WARNING_TRANSCRIPT_INCOMPLETE),upstream_gene_variant(MODIFIER||621|||mt:tRNA:H||NON_CODING|FBtr0100878||1),downstream_gene_variant(MODIFIER||718||96|mt:ND4L|protein_c…
dmel_mitochondrion_genome	8875	.	A	G	30	PASS	EFF=synonymous_variant(LOW||Cta/Cta|p.Leu224Leu/c.670T>C|445|mt:ND4|protein_coding|CODING|FBtr0100879|1|1|WARNING_TRANSCRIPT_INCOMPLETE+WARNING_REF_DOES_NOT_MATCH_GENOME),upstream_gene_variant(MODIFIER||751||573|mt:ND5|protein_coding|CODING|FBtr0100877||1|WARNING_TRANSCRIPT_INCOMPLETE),upstream_gene_variant(MODIFIER||670|||mt:tRNA:H||NON_CODING|FBtr0100878||1),upstream_gene_variant(MODIFIER||962|…
dmel_mitochondrion_genome	8981	.	C	T	30	PASS	EFF=synonymous_variant(LOW|SILENT|ttG/ttA|p.Leu188Leu/c.564G>A|445|mt:ND4|protein_coding|CODING|FBtr0100879|1|1|WARNING_TRANSCRIPT_INCOMPLETE),upstream_gene_variant(MODIFIER||857||573|mt:ND5|protein_coding|CODING|FBtr0100877||1|WARNING_TRANSCRIPT_INCOMPLETE),upstream_gene_variant(MODIFIER||776|||mt:tRNA:H||NON_CODING|FBtr0100878||1),upstream_gene_variant(MODIFIER||856|||mt:tRNA:T||NON_CODING|FBtr…

## Sheet: MB_C4.13 SNPEff candidate SNPs
##SnpEffVersion="4.0e (build 2014-09-13), by Pablo Cingolani"
##SnpEffCmd="SnpEff dm6.01 /Users/pgriffin/Documents/Drosophila Selection Experiment/snp_and_gene_lists/C4_fet_drift_sig_SNPs_150821.vcf "
##INFO=<ID=EFF,Number=.,Type=String,Description="Predicted effects for this variant.Format: 'Effect ( Effect_Impact | Functional_Class | Codon_Change | Amino_Acid_Change| Amino_Acid_length | Gene_Name | Transcript_BioType | Gene_Coding | Transcript_ID | Exon_Rank | Genotype_Number [ | ERRORS | WARNINGS ] )' ">
##INFO=<ID=LOF,Number=.,Type=String,Description="Predicted loss of function effects for this variant. Format: 'Gene_Name | Gene_ID | Number_of_transcripts_in_gene | Percent_of_transcripts_affected' ">
##INFO=<ID=NMD,Number=.,Type=String,Description="Predicted nonsense mediated decay effects for this variant. Format: 'Gene_Name | Gene_ID | Number_of_transcripts_in_gene | Percent_of_transcripts_affected' ">
#CHROM	POS	ID	REF	ALT	QUAL	FILTER	INFO
2L	10925823	.	C	G	30	PASS	EFF=intron_variant(MODIFIER|||c.140-313G>C|410|dpr2|protein_coding|CODING|FBtr0340553|2|1),intron_variant(MODIFIER|||c.140-313G>C|410|dpr2|protein_coding|CODING|FBtr0340554|2|1)
2L	14051494	.	C	T	30	PASS	EFF=intron_variant(MODIFIER|||c.-654+9260C>T|808|nAChRalpha5|protein_coding|CODING|FBtr0080594|2|1),intron_variant(MODIFIER|||c.-654+9260C>T|808|nAChRalpha5|protein_coding|CODING|FBtr0300594|2|1),intron_variant(MODIFIER|||c.-654+9260C>T|808|nAChRalpha5|protein_coding|CODING|FBtr0309867|2|1)
2L	15100495	.	G	T	30	PASS	EFF=intergenic_region(MODIFIER||||||||||1)
2L	18720869	.	G	A	30	PASS	EFF=intron_variant(MODIFIER|||c.-250-4167C>T|540|CG10348|protein_coding|CODING|FBtr0301647|1|1),intron_variant(MODIFIER|||c.-250-4167C>T|540|CG10348|protein_coding|CODING|FBtr0343112|1|1)
2L	18850769	.	C	T	30	PASS	EFF=intron_variant(MODIFIER|||c.-158-2185C>T|373|CG17321|protein_coding|CODING|FBtr0081110|1|1),intron_variant(MODIFIER|||c.-158-2185C>T|373|CG17321|protein_coding|CODING|FBtr0342919|1|1)
2L	18850817	.	T	A	30	PASS	EFF=intron_variant(MODIFIER|||c.-158-2137T>A|373|CG17321|protein_coding|CODING|FBtr0081110|1|1),intron_variant(MODIFIER|||c.-158-2137T>A|373|CG17321|protein_coding|CODING|FBtr0342919|1|1)
2L	18969073	.	C	T	30	PASS	EFF=5_prime_UTR_variant(MODIFIER||26|c.-26C>T|921|Tango6|protein_coding|CODING|FBtr0081133|1|1),upstream_gene_variant(MODIFIER||352||698|Nak|protein_coding|CODING|FBtr0081189||1),upstream_gene_variant(MODIFIER||329||1488|Nak|protein_coding|CODING|FBtr0081187||1),upstream_gene_variant(MODIFIER||329||1488|Nak|protein_coding|CODING|FBtr0340325||1),upstream_gene_variant(MODIFIER||329||708|Nak|protein…
2L	19580558	.	A	C	30	PASS	EFF=upstream_gene_variant(MODIFIER||207||189|CG10268|protein_coding|CODING|FBtr0081266||1),downstream_gene_variant(MODIFIER||54||302|Hakai|protein_coding|CODING|FBtr0081263||1),downstream_gene_variant(MODIFIER||54||311|Hakai|protein_coding|CODING|FBtr0081264||1),downstream_gene_variant(MODIFIER||54||464|Hakai|protein_coding|CODING|FBtr0331245||1),downstream_gene_variant(MODIFIER||54||473|Hakai|pr…
2L	20953104	.	T	C	30	PASS	EFF=intergenic_region(MODIFIER||||||||||1)
2L	21742035	.	G	A	30	PASS	EFF=intron_variant(MODIFIER|||c.867-27C>T|410|step|protein_coding|CODING|FBtr0085910|7|1),intron_variant(MODIFIER|||c.1818-27C>T|727|step|protein_coding|CODING|FBtr0301616|8|1),intron_variant(MODIFIER|||c.1818-27C>T|727|step|protein_coding|CODING|FBtr0301617|7|1),intron_variant(MODIFIER|||c.1818-27C>T|727|step|protein_coding|CODING|FBtr0332471|9|1)
2L	21866068	.	A	T	30	PASS	EFF=downstream_gene_variant(MODIFIER||786|||CR44919||NON_CODING|FBtr0343886||1),intron_variant(MODIFIER|||n.339-2157A>T||CR44917||NON_CODING|FBtr0343879|1|1),intron_variant(MODIFIER|||n.197+27T>A||CR44918||NON_CODING|FBtr0343887|1|1)
2R	5299097	.	A	T	30	PASS	EFF=intergenic_region(MODIFIER||||||||||1)
2R	5304194	.	G	A	30	PASS	EFF=intergenic_region(MODIFIER||||||||||1)
2R	5892791	.	C	T	30	PASS	EFF=intergenic_region(MODIFIER||||||||||1)
2R	7665648	.	G	A	30	PASS	EFF=upstream_gene_variant(MODIFIER||180||330|CG2064|protein_coding|CODING|FBtr0088923||1),downstream_gene_variant(MODIFIER||379||300|CG2065|protein_coding|CODING|FBtr0088922||1),downstream_gene_variant(MODIFIER||379||300|CG2065|protein_coding|CODING|FBtr0337000||1),intergenic_region(MODIFIER||||||||||1)
2R	7683939	.	G	A	30	PASS	EFF=intron_variant(MODIFIER|||c.1221+29C>T|1452|CG1399|protein_coding|CODING|FBtr0088939|10|1),intron_variant(MODIFIER|||c.1152+29C>T|1429|CG1399|protein_coding|CODING|FBtr0300779|10|1),intron_variant(MODIFIER|||c.1215+29C>T|1486|CG1399|protein_coding|CODING|FBtr0332911|11|1),intron_variant(MODIFIER|||c.1152+29C>T|1296|CG1399|protein_coding|CODING|FBtr0332912|10|1)
2R	7683947	.	T	A	30	PASS	EFF=intron_variant(MODIFIER|||c.1221+21A>T|1452|CG1399|protein_coding|CODING|FBtr0088939|10|1),intron_variant(MODIFIER|||c.1152+21A>T|1429|CG1399|protein_coding|CODING|FBtr0300779|10|1),intron_variant(MODIFIER|||c.1215+21A>T|1486|CG1399|protein_coding|CODING|FBtr0332911|11|1),intron_variant(MODIFIER|||c.1152+21A>T|1296|CG1399|protein_coding|CODING|FBtr0332912|10|1)
2R	7852569	.	C	T	30	PASS	EFF=intron_variant(MODIFIER|||c.751+837G>A|1211|Dgk|protein_coding|CODING|FBtr0112580|7|1),intron_variant(MODIFIER|||c.752-223G>A|1230|Dgk|protein_coding|CODING|FBtr0308589|7|1),intron_variant(MODIFIER|||c.362-223G>A|1108|Dgk|protein_coding|CODING|FBtr0112581|5|1),intron_variant(MODIFIER|||c.362-223G>A|1139|Dgk|protein_coding|CODING|FBtr0330238|5|1)
2R	8725908	.	C	T	30	PASS	EFF=downstream_gene_variant(MODIFIER||843|||snoRNA:gcl-a||NON_CODING|FBtr0309762||1),intron_variant(MODIFIER|||c.-23-707C>T|569|gcl|protein_coding|CODING|FBtr0088710|1|1),intron_variant(MODIFIER|||c.-23-707C>T|568|gcl|protein_coding|CODING|FBtr0339337|2|1)
2R	9531262	.	G	A	30	PASS	EFF=intron_variant(MODIFIER|||c.1833+1056G>A|1740|brp|protein_coding|CODING|FBtr0299915|13|1),intron_variant(MODIFIER|||c.1833+1056G>A|1740|brp|protein_coding|CODING|FBtr0299916|11|1),intron_variant(MODIFIER|||c.1971+1056G>A|1786|brp|protein_coding|CODING|FBtr0300245|12|1),intron_variant(MODIFIER|||c.1833+1056G>A|1740|brp|protein_coding|CODING|FBtr0300542|9|1),intron_variant(MODIFIER|||c.993+1056…
2R	10988700	.	T	A	30	PASS	EFF=intron_variant(MODIFIER|||c.1537+928A>T|570|luna|protein_coding|CODING|FBtr0088210|4|1),intron_variant(MODIFIER|||c.1537+928A>T|570|luna|protein_coding|CODING|FBtr0333066|4|1),intron_variant(MODIFIER|||c.1537+928A>T|570|luna|protein_coding|CODING|FBtr0345675|4|1)
2R	21628467	.	A	T	30	PASS	EFF=synonymous_variant(LOW|SILENT|ggA/ggT|p.Gly989Gly/c.2967A>T|1544|mahj|protein_coding|CODING|FBtr0304728|5|1),synonymous_variant(LOW|SILENT|ggA/ggT|p.Gly989Gly/c.2967A>T|1544|mahj|protein_coding|CODING|FBtr0071658|5|1)
2R	21629299	.	T	A	30	PASS	EFF=intron_variant(MODIFIER|||c.3777+22T>A|1544|mahj|protein_coding|CODING|FBtr0071658|5|1),intron_variant(MODIFIER|||c.3777+22T>A|1544|mahj|protein_coding|CODING|FBtr0304728|5|1)
2R	21684336	.	G	A	30	PASS	EFF=synonymous_variant(LOW||ttA/ttA|p.Leu1843Leu/c.5529G>A|1959|stum|protein_coding|CODING|FBtr0331982|10|1|WARNING_REF_DOES_NOT_MATCH_GENOME),synonymous_variant(LOW||ttA/ttA|p.Leu1754Leu/c.5262G>A|1870|stum|protein_coding|CODING|FBtr0273308|8|1|WARNING_REF_DOES_NOT_MATCH_GENOME),upstream_gene_variant(MODIFIER||947||222|CG10306|protein_coding|CODING|FBtr0071670||1)
2R	21947693	.	T	A	30	PASS	EFF=intergenic_region(MODIFIER||||||||||1)
2R	24097052	.	G	A	30	PASS	EFF=intron_variant(MODIFIER|||c.519+20C>T|1637|gek|protein_coding|CODING|FBtr0072287|3|1)
3L	124543	.	T	C	30	PASS	EFF=upstream_gene_variant(MODIFIER||878|||CR45402||NON_CODING|FBtr0345842||1),downstream_gene_variant(MODIFIER||466|||CR45401||NON_CODING|FBtr0345843||1),intergenic_region(MODIFIER||||||||||1)
3L	4321009	.	A	G	30	PASS	EFF=3_prime_UTR_variant(MODIFIER||60|c.*60A>G|314|CG32250|protein_coding|CODING|FBtr0306092|4|1),3_prime_UTR_variant(MODIFIER||60|c.*60A>G|314|CG32250|protein_coding|CODING|FBtr0073287|3|1),downstream_gene_variant(MODIFIER||96||324|CG15014|protein_coding|CODING|FBtr0073340||1)
3L	4321254	.	T	C	30	PASS	EFF=missense_variant(MODERATE|MISSENSE|gAg/gGg|p.Glu315Gly/c.944A>G|324|CG15014|protein_coding|CODING|FBtr0073340|1|1),downstream_gene_variant(MODIFIER||145||314|CG32250|protein_coding|CODING|FBtr0073287||1),downstream_gene_variant(MODIFIER||145||314|CG32250|protein_coding|CODING|FBtr0306092||1)
3L	4336944	.	C	T	30	PASS	EFF=intron_variant(MODIFIER|||c.231-625G>A|631|Cip4|protein_coding|CODING|FBtr0073339|3|1),intron_variant(MODIFIER|||c.333-625G>A|665|Cip4|protein_coding|CODING|FBtr0113138|3|1),intron_variant(MODIFIER|||c.231-625G>A|612|Cip4|protein_coding|CODING|FBtr0306094|3|1),intron_variant(MODIFIER|||c.333-625G>A|646|Cip4|protein_coding|CODING|FBtr0306095|3|1),intron_variant(MODIFIER|||c.231-625G>A|624|Cip4…
3L	4337644	.	C	T	30	PASS	EFF=intron_variant(MODIFIER|||c.230+423G>A|631|Cip4|protein_coding|CODING|FBtr0073339|3|1),intron_variant(MODIFIER|||c.332+423G>A|665|Cip4|protein_coding|CODING|FBtr0113138|3|1),intron_variant(MODIFIER|||c.230+423G>A|612|Cip4|protein_coding|CODING|FBtr0306094|3|1),intron_variant(MODIFIER|||c.332+423G>A|646|Cip4|protein_coding|CODING|FBtr0306095|3|1),intron_variant(MODIFIER|||c.230+423G>A|624|Cip4…
3L	4585980	.	G	T	30	PASS	EFF=intron_variant(MODIFIER|||c.754-600G>T|505|CG42540|protein_coding|CODING|FBtr0301095|4|1),intron_variant(MODIFIER|||c.433-600G>T|398|CG42540|protein_coding|CODING|FBtr0301096|7|1),intron_variant(MODIFIER|||c.430-600G>T|397|CG42540|protein_coding|CODING|FBtr0301097|6|1),intron_variant(MODIFIER|||c.757-600G>T|506|CG42540|protein_coding|CODING|FBtr0301098|8|1),intron_variant(MODIFIER|||c.790-600…
3L	4716216	.	C	A	30	PASS	EFF=intron_variant(MODIFIER|||c.-365+8566C>A|1984|RhoGEF64C|protein_coding|CODING|FBtr0073345|2|1),intron_variant(MODIFIER|||c.-234+8566C>A|1984|RhoGEF64C|protein_coding|CODING|FBtr0332738|2|1)
3L	4830108	.	T	C	30	PASS	EFF=missense_variant(MODERATE|MISSENSE|Acg/Gcg|p.Thr964Ala/c.2890A>G|1301|CG13708|protein_coding|CODING|FBtr0073358|3|1),missense_variant(MODERATE|MISSENSE|Acg/Gcg|p.Thr964Ala/c.2890A>G|1301|CG13708|protein_coding|CODING|FBtr0332744|3|1)
3L	4830154	.	G	A	30	PASS	EFF=synonymous_variant(LOW|SILENT|gcC/gcT|p.Ala948Ala/c.2844C>T|1301|CG13708|protein_coding|CODING|FBtr0073358|3|1),synonymous_variant(LOW|SILENT|gcC/gcT|p.Ala948Ala/c.2844C>T|1301|CG13708|protein_coding|CODING|FBtr0332744|3|1)
3L	4830580	.	G	A	30	PASS	EFF=synonymous_variant(LOW|SILENT|aaC/aaT|p.Asn806Asn/c.2418C>T|1301|CG13708|protein_coding|CODING|FBtr0073358|3|1),synonymous_variant(LOW|SILENT|aaC/aaT|p.Asn806Asn/c.2418C>T|1301|CG13708|protein_coding|CODING|FBtr0332744|3|1)
3L	4895512	.	G	C	30	PASS	EFF=3_prime_UTR_variant(MODIFIER||221|c.*221G>C|4385|CG17150|protein_coding|CODING|FBtr0289982|52|1)
3L	4971777	.	A	G	30	PASS	EFF=intron_variant(MODIFIER|||c.-113+4041T>C|691|Con|protein_coding|CODING|FBtr0073375|1|1),intron_variant(MODIFIER|||c.-112-8587T>C|691|Con|protein_coding|CODING|FBtr0309972|4|1)
3L	5147621	.	C	T	30	PASS	EFF=synonymous_variant(LOW|SILENT|atC/atT|p.Ile379Ile/c.1137C>T|1012|Aats-ala-m|protein_coding|CODING|FBtr0077168|6|1)
3L	5277216	.	G	A	30	PASS	EFF=intron_variant(MODIFIER|||c.-42+398C>T|578|shep|protein_coding|CODING|FBtr0077172|1|1),intron_variant(MODIFIER|||c.-42+398C>T|590|shep|protein_coding|CODING|FBtr0308859|1|1)
3L	5331841	.	A	T	30	PASS	EFF=intergenic_region(MODIFIER||||||||||1)
3L	5346407	.	T	A	30	PASS	EFF=5_prime_UTR_variant(MODIFIER||311|c.-311A>T|658|lama|protein_coding|CODING|FBtr0077160|3|1),5_prime_UTR_variant(MODIFIER||311|c.-311A>T|658|lama|protein_coding|CODING|FBtr0077161|3|1),5_prime_UTR_variant(MODIFIER||311|c.-311A>T|658|lama|protein_coding|CODING|FBtr0333595|4|1),5_prime_UTR_variant(MODIFIER||311|c.-311A>T|658|lama|protein_coding|CODING|FBtr0077159|3|1)
3L	5346408	.	A	C	30	PASS	EFF=5_prime_UTR_variant(MODIFIER||312|c.-312T>G|658|lama|protein_coding|CODING|FBtr0077160|3|1),5_prime_UTR_variant(MODIFIER||312|c.-312T>G|658|lama|protein_coding|CODING|FBtr0077161|3|1),5_prime_UTR_variant(MODIFIER||312|c.-312T>G|658|lama|protein_coding|CODING|FBtr0333595|4|1),5_prime_UTR_variant(MODIFIER||312|c.-312T>G|658|lama|protein_coding|CODING|FBtr0077159|3|1)
3L	5510737	.	C	T	30	PASS	EFF=intron_variant(MODIFIER|||c.25+59G>A|572|CG34342|protein_coding|CODING|FBtr0344834|1|1),intron_variant(MODIFIER|||c.25+59G>A|322|CG34342|protein_coding|CODING|FBtr0344835|1|1)
3L	5592488	.	A	T	30	PASS	EFF=5_prime_UTR_variant(MODIFIER||270|c.-270T>A|543|spo|protein_coding|CODING|FBtr0346640|1|1),upstream_gene_variant(MODIFIER||219||543|spo|protein_coding|CODING|FBtr0077130||1),downstream_gene_variant(MODIFIER||253||524|CG10592|protein_coding|CODING|FBtr0077129||1)
3L	5592512	.	T	C	30	PASS	EFF=5_prime_UTR_premature_start_codon_gain_variant(LOW||||543|spo|protein_coding|CODING|FBtr0346640|1|1),5_prime_UTR_variant(MODIFIER||294|c.-294A>G|543|spo|protein_coding|CODING|FBtr0346640|1|1),upstream_gene_variant(MODIFIER||243||543|spo|protein_coding|CODING|FBtr0077130||1),downstream_gene_variant(MODIFIER||229||524|CG10592|protein_coding|CODING|FBtr0077129||1)
3L	5592523	.	T	G	30	PASS	EFF=5_prime_UTR_variant(MODIFIER||305|c.-305A>C|543|spo|protein_coding|CODING|FBtr0346640|1|1),upstream_gene_variant(MODIFIER||254||543|spo|protein_coding|CODING|FBtr0077130||1),downstream_gene_variant(MODIFIER||218||524|CG10592|protein_coding|CODING|FBtr0077129||1)
3L	5592534	.	C	T	30	PASS	EFF=5_prime_UTR_variant(MODIFIER||316|c.-316G>A|543|spo|protein_coding|CODING|FBtr0346640|1|1),upstream_gene_variant(MODIFIER||265||543|spo|protein_coding|CODING|FBtr0077130||1),downstream_gene_variant(MODIFIER||207||524|CG10592|protein_coding|CODING|FBtr0077129||1)
3L	5655377	.	A	G	30	PASS	EFF=intron_variant(MODIFIER|||c.67+331A>G|195|lin-28|protein_coding|CODING|FBtr0077090|1|1)
3L	5665864	.	A	C	30	PASS	EFF=5_prime_UTR_variant(MODIFIER||2171|c.-500A>C|2072|sif|protein_coding|CODING|FBtr0112708|1|1),5_prime_UTR_variant(MODIFIER||2171|c.-323A>C|2088|sif|protein_coding|CODING|FBtr0340655|1|1),5_prime_UTR_variant(MODIFIER||7353|c.-1905A>C|2476|sif|protein_coding|CODING|FBtr0340656|1|1),5_prime_UTR_variant(MODIFIER||2171|c.-323A>C|2091|sif|protein_coding|CODING|FBtr0330125|1|1),5_prime_UTR_variant(MO…
3L	5666117	.	T	A	30	PASS	EFF=intron_variant(MODIFIER|||c.-150-1705T>A|2072|sif|protein_coding|CODING|FBtr0330122|2|1),intron_variant(MODIFIER|||c.-150-1705T>A|2081|sif|protein_coding|CODING|FBtr0340654|3|1),intron_variant(MODIFIER|||c.-328+81T>A|2072|sif|protein_coding|CODING|FBtr0112708|1|1),intron_variant(MODIFIER|||c.-151+81T>A|2657|sif|protein_coding|CODING|FBtr0112712|1|1),intron_variant(MODIFIER|||c.-151+81T>A|2734…
3L	5702515	.	T	G	30	PASS	EFF=intron_variant(MODIFIER|||c.2395-1410T>G|2072|sif|protein_coding|CODING|FBtr0112708|14|1),intron_variant(MODIFIER|||c.2395-1410T>G|2657|sif|protein_coding|CODING|FBtr0112712|13|1),intron_variant(MODIFIER|||c.2395-1410T>G|2072|sif|protein_coding|CODING|FBtr0330122|14|1),intron_variant(MODIFIER|||c.2452-1410T>G|2734|sif|protein_coding|CODING|FBtr0330123|14|1),intron_variant(MODIFIER|||c.2425-14…
3L	5705378	.	G	A	30	PASS	EFF=intron_variant(MODIFIER|||c.2820+137G>A|2072|sif|protein_coding|CODING|FBtr0112708|16|1),intron_variant(MODIFIER|||c.2760+137G>A|2052|sif|protein_coding|CODING|FBtr0112709|4|1),intron_variant(MODIFIER|||c.2760+137G>A|2061|sif|protein_coding|CODING|FBtr0112710|4|1),intron_variant(MODIFIER|||c.2820+137G>A|2657|sif|protein_coding|CODING|FBtr0112712|15|1),intron_variant(MODIFIER|||c.2820+137G>A|2…
3L	5715500	.	A	G	30	PASS	EFF=intron_variant(MODIFIER|||c.2953-597A>G|2072|sif|protein_coding|CODING|FBtr0112708|17|1),intron_variant(MODIFIER|||c.2893-597A>G|2052|sif|protein_coding|CODING|FBtr0112709|5|1),intron_variant(MODIFIER|||c.2893-597A>G|2061|sif|protein_coding|CODING|FBtr0112710|5|1),intron_variant(MODIFIER|||c.2953-597A>G|2657|sif|protein_coding|CODING|FBtr0112712|16|1),intron_variant(MODIFIER|||c.2953-597A>G|2…
3L	5715534	.	G	T	30	PASS	EFF=intron_variant(MODIFIER|||c.2953-563G>T|2072|sif|protein_coding|CODING|FBtr0112708|17|1),intron_variant(MODIFIER|||c.2893-563G>T|2052|sif|protein_coding|CODING|FBtr0112709|5|1),intron_variant(MODIFIER|||c.2893-563G>T|2061|sif|protein_coding|CODING|FBtr0112710|5|1),intron_variant(MODIFIER|||c.2953-563G>T|2657|sif|protein_coding|CODING|FBtr0112712|16|1),intron_variant(MODIFIER|||c.2953-563G>T|2…
3L	5715535	.	C	G	30	PASS	EFF=intron_variant(MODIFIER|||c.2953-562C>G|2072|sif|protein_coding|CODING|FBtr0112708|17|1),intron_variant(MODIFIER|||c.2893-562C>G|2052|sif|protein_coding|CODING|FBtr0112709|5|1),intron_variant(MODIFIER|||c.2893-562C>G|2061|sif|protein_coding|CODING|FBtr0112710|5|1),intron_variant(MODIFIER|||c.2953-562C>G|2657|sif|protein_coding|CODING|FBtr0112712|16|1),intron_variant(MODIFIER|||c.2953-562C>G|2…
3L	5740272	.	G	T	30	PASS	EFF=synonymous_variant(LOW|SILENT|gcG/gcT|p.Ala1885Ala/c.5655G>T|2476|sif|protein_coding|CODING|FBtr0340656|33|1),synonymous_variant(LOW|SILENT|gcG/gcT|p.Ala2055Ala/c.6165G>T|2646|sif|protein_coding|CODING|FBtr0330126|22|1),synonymous_variant(LOW|SILENT|gcG/gcT|p.Ala2066Ala/c.6198G>T|2657|sif|protein_coding|CODING|FBtr0112712|33|1),synonymous_variant(LOW|SILENT|gcG/gcT|p.Ala2085Ala/c.6255G>T|2734…
3L	5803635	.	T	A	30	PASS	EFF=upstream_gene_variant(MODIFIER||29||434|CG42272|protein_coding|CODING|FBtr0299617||1),intron_variant(MODIFIER|||c.1185+2193A>T|490|S6k|protein_coding|CODING|FBtr0077114|9|1),intron_variant(MODIFIER|||c.1185+2193A>T|490|S6k|protein_coding|CODING|FBtr0333264|9|1),intron_variant(MODIFIER|||c.391+212T>A|584|CG42272|protein_coding|CODING|FBtr0299616|1|1)
3L	5872120	.	G	C	30	PASS	EFF=missense_variant(MODERATE|MISSENSE|gGc/gCc|p.Gly156Ala/c.467G>C|545|CG5568|protein_coding|CODING|FBtr0077025|2|1)
3L	8453918	.	T	C	30	PASS	EFF=intron_variant(MODIFIER|||c.-70+3461T>C|1985|Gug|protein_coding|CODING|FBtr0305696|1|1),intron_variant(MODIFIER|||c.-70+3461T>C|2006|Gug|protein_coding|CODING|FBtr0305698|1|1),intron_variant(MODIFIER|||c.-70+1790T>C|1966|Gug|protein_coding|CODING|FBtr0076616|2|1),intron_variant(MODIFIER|||c.-70+1790T>C|1988|Gug|protein_coding|CODING|FBtr0076618|2|1),intron_variant(MODIFIER|||c.-70+1790T>C|198…
3L	8453922	.	A	C	30	PASS	EFF=intron_variant(MODIFIER|||c.-70+3465A>C|1985|Gug|protein_coding|CODING|FBtr0305696|1|1),intron_variant(MODIFIER|||c.-70+3465A>C|2006|Gug|protein_coding|CODING|FBtr0305698|1|1),intron_variant(MODIFIER|||c.-70+1794A>C|1966|Gug|protein_coding|CODING|FBtr0076616|2|1),intron_variant(MODIFIER|||c.-70+1794A>C|1988|Gug|protein_coding|CODING|FBtr0076618|2|1),intron_variant(MODIFIER|||c.-70+1794A>C|198…
3L	8808997	.	G	T	30	PASS	EFF=missense_variant(MODERATE|MISSENSE|Gtt/Ttt|p.Val152Phe/c.454G>T|233|CG13308|protein_coding|CODING|FBtr0303232|1|1),downstream_gene_variant(MODIFIER||590||209|CG32024|protein_coding|CODING|FBtr0076580||1)
3L	8811438	.	A	C	30	PASS	EFF=downstream_gene_variant(MODIFIER||173||229|CG13309|protein_coding|CODING|FBtr0076582||1),intergenic_region(MODIFIER||||||||||1)
3L	8824365	.	C	T	30	PASS	EFF=intergenic_region(MODIFIER||||||||||1)
3L	10434378	.	A	C	30	PASS	EFF=upstream_gene_variant(MODIFIER||273||573|Ir67c|protein_coding|CODING|FBtr0076293||1),intergenic_region(MODIFIER||||||||||1)
3L	13262939	.	A	T	30	PASS	EFF=intron_variant(MODIFIER|||c.-340-2241A>T|540|caps|protein_coding|CODING|FBtr0075832|3|1),intron_variant(MODIFIER|||c.-340-2241A>T|780|caps|protein_coding|CODING|FBtr0305480|3|1),intron_variant(MODIFIER|||c.-128+11728A>T|540|caps|protein_coding|CODING|FBtr0075833|3|1)
3L	13881861	.	G	A	30	PASS	EFF=5_prime_UTR_variant(MODIFIER||794|c.-344G>A|78|CG13737|protein_coding|CODING|FBtr0075755|1|1),intron_variant(MODIFIER|||c.2463+1403C>T|1015|dysc|protein_coding|CODING|FBtr0330419|12|1),intron_variant(MODIFIER|||c.2463+1403C>T|986|dysc|protein_coding|CODING|FBtr0330420|12|1),intron_variant(MODIFIER|||c.2451+1403C>T|982|dysc|protein_coding|CODING|FBtr0333021|12|1),intron_variant(MODIFIER|||c.24…
3L	16233598	.	A	T	30	PASS	EFF=upstream_gene_variant(MODIFIER||542||373|l_3_72Dp|protein_coding|CODING|FBtr0075459||1),downstream_gene_variant(MODIFIER||862||133|MED10|protein_coding|CODING|FBtr0301481||1),downstream_gene_variant(MODIFIER||821||133|MED10|protein_coding|CODING|FBtr0333560||1),intron_variant(MODIFIER|||c.335+16A>T|240|Hsc20|protein_coding|CODING|FBtr0112440|2|1)
3L	16426630	.	G	A	30	PASS	EFF=synonymous_variant(LOW|SILENT|Ctg/Ttg|p.Leu548Leu/c.1642C>T|852|dsx-c73A|protein_coding|CODING|FBtr0075409|3|1),intron_variant(MODIFIER|||c.2728+3984G>A|1033|CG33158|protein_coding|CODING|FBtr0075390|3|1)
3R	9104025	.	T	C	30	PASS	EFF=intron_variant(MODIFIER|||c.157-23003A>G|925|pum|protein_coding|CODING|FBtr0305197|2|1),intron_variant(MODIFIER|||c.145-23003A>G|921|pum|protein_coding|CODING|FBtr0333668|1|1),intron_variant(MODIFIER|||c.1981-23003A>G|1533|pum|protein_coding|CODING|FBtr0081990|8|1),intron_variant(MODIFIER|||c.1981-23003A>G|1533|pum|protein_coding|CODING|FBtr0081991|8|1),intron_variant(MODIFIER|||c.1981-23003A…
3R	14895118	.	C	G	30	PASS	EFF=downstream_gene_variant(MODIFIER||585||796|Nup93-2|protein_coding|CODING|FBtr0083008||1),intron_variant(MODIFIER|||c.239-15C>G|263|CG14860|protein_coding|CODING|FBtr0289976|1|1)
3R	19126342	.	G	T	30	PASS	EFF=missense_variant(MODERATE|MISSENSE|gaG/gaT|p.Glu781Asp/c.2343G>T|1784|CG6040|protein_coding|CODING|FBtr0083729|3|1)
3R	19902050	.	G	A	30	PASS	EFF=intron_variant(MODIFIER|||c.59-240C>T|673|CG4538|protein_coding|CODING|FBtr0083855|1|1),intron_variant(MODIFIER|||c.59-240C>T|679|CG4538|protein_coding|CODING|FBtr0344261|1|1),intron_variant(MODIFIER|||c.59-240C>T|673|CG4538|protein_coding|CODING|FBtr0344262|1|1)
3R	21914347	.	C	A	30	PASS	EFF=missense_variant(MODERATE|MISSENSE|Caa/Aaa|p.Gln187Lys/c.559C>A|552|CG17843|protein_coding|CODING|FBtr0084150|1|1),downstream_gene_variant(MODIFIER||756||562|CG6690|protein_coding|CODING|FBtr0084149||1)
3R	21928425	.	G	T	30	PASS	EFF=intergenic_region(MODIFIER||||||||||1)
3R	21939850	.	C	G	30	PASS	EFF=intergenic_region(MODIFIER||||||||||1)
3R	23658969	.	G	A	30	PASS	EFF=intron_variant(MODIFIER|||c.-662+1023C>T|528|CG31145|protein_coding|CODING|FBtr0084480|3|1),intron_variant(MODIFIER|||c.-234+1023C>T|980|CG31145|protein_coding|CODING|FBtr0290056|3|1),intron_variant(MODIFIER|||c.-234+1023C>T|915|CG31145|protein_coding|CODING|FBtr0290057|3|1),intron_variant(MODIFIER|||c.-705-5201C>T|528|CG31145|protein_coding|CODING|FBtr0084479|2|1),intron_variant(MODIFIER|||c…
X	2631843	.	A	T	30	PASS	EFF=synonymous_variant(LOW|SILENT|atA/atT|p.Ile1715Ile/c.5145A>T|2134|PI4KIIIalpha|protein_coding|CODING|FBtr0307158|7|1),synonymous_variant(LOW|SILENT|atA/atT|p.Ile1735Ile/c.5205A>T|2154|PI4KIIIalpha|protein_coding|CODING|FBtr0331587|8|1)
X	2643987	.	C	T	30	PASS	EFF=upstream_gene_variant(MODIFIER||986||441|sgg|protein_coding|CODING|FBtr0302185||1),intron_variant(MODIFIER|||c.-256-1389C>T|416|sgg|protein_coding|CODING|FBtr0301966|2|1),intron_variant(MODIFIER|||c.85+1894C>T|514|sgg|protein_coding|CODING|FBtr0070466|2|1),intron_variant(MODIFIER|||c.85+1894C>T|575|sgg|protein_coding|CODING|FBtr0070467|2|1),intron_variant(MODIFIER|||c.85+1894C>T|514|sgg|prote…
X	9663533	.	T	C	30	PASS	EFF=upstream_gene_variant(MODIFIER||775||742|CG3106|protein_coding|CODING|FBtr0071403||1),upstream_gene_variant(MODIFIER||630||742|CG3106|protein_coding|CODING|FBtr0346168||1),intergenic_region(MODIFIER||||||||||1)
X	17630769	.	C	T	30	PASS	EFF=missense_variant(MODERATE|MISSENSE|Gca/Aca|p.Ala320Thr/c.958G>A|554|CG8316|protein_coding|CODING|FBtr0074485|4|1),missense_variant(MODERATE|MISSENSE|Gca/Aca|p.Ala318Thr/c.952G>A|552|CG8316|protein_coding|CODING|FBtr0340624|4|1)
X	19285689	.	T	A	30	PASS	EFF=upstream_gene_variant(MODIFIER||888||582|CG8034|protein_coding|CODING|FBtr0301226||1),intron_variant(MODIFIER|||c.82-871A>T|647|CG8034|protein_coding|CODING|FBtr0074684|1|1)
X	19394774	.	T	G	30	PASS	EFF=intron_variant(MODIFIER|||c.-630+31753T>G|931|kek5|protein_coding|CODING|FBtr0074707|2|1),intron_variant(MODIFIER|||c.-630+31753T>G|931|kek5|protein_coding|CODING|FBtr0074708|2|1),intron_variant(MODIFIER|||c.-597+31753T>G|931|kek5|protein_coding|CODING|FBtr0309224|2|1),intron_variant(MODIFIER|||c.-661-3729T>G|931|kek5|protein_coding|CODING|FBtr0309223|3|1)
X	20072567	.	A	T	30	PASS	EFF=intergenic_region(MODIFIER||||||||||1)
X	20270067	.	C	T	30	PASS	EFF=upstream_gene_variant(MODIFIER||298||481|Inx6|protein_coding|CODING|FBtr0077339||1),intergenic_region(MODIFIER||||||||||1)
dmel_mitochondrion_genome	8267	.	C	A	30	PASS	EFF=missense_variant(MODERATE|MISSENSE|ttG/ttT|p.Leu426Phe/c.1278G>T|445|mt:ND4|protein_coding|CODING|FBtr0100879|1|1|WARNING_TRANSCRIPT_INCOMPLETE),upstream_gene_variant(MODIFIER||143||573|mt:ND5|protein_coding|CODING|FBtr0100877||1|WARNING_TRANSCRIPT_INCOMPLETE),upstream_gene_variant(MODIFIER||62|||mt:tRNA:H||NON_CODING|FBtr0100878||1)
dmel_mitochondrion_genome	8826	.	A	G	30	PASS	EFF=missense_variant(MODERATE|MISSENSE|tTa/tCa|p.Leu240Ser/c.719T>C|445|mt:ND4|protein_coding|CODING|FBtr0100879|1|1|WARNING_TRANSCRIPT_INCOMPLETE),upstream_gene_variant(MODIFIER||702||573|mt:ND5|protein_coding|CODING|FBtr0100877||1|WARNING_TRANSCRIPT_INCOMPLETE),upstream_gene_variant(MODIFIER||621|||mt:tRNA:H||NON_CODING|FBtr0100878||1),downstream_gene_variant(MODIFIER||718||96|mt:ND4L|protein_c…

## Sheet: MB_C5.13 SNPEff candidate SNPs
##SnpEffVersion="4.0e (build 2014-09-13), by Pablo Cingolani"
##SnpEffCmd="SnpEff dm6.01 /Users/pgriffin/Documents/Drosophila Selection Experiment/snp_and_gene_lists/C5_fet_drift_sig_SNPs_150821.vcf "
##INFO=<ID=EFF,Number=.,Type=String,Description="Predicted effects for this variant.Format: 'Effect ( Effect_Impact | Functional_Class | Codon_Change | Amino_Acid_Change| Amino_Acid_length | Gene_Name | Transcript_BioType | Gene_Coding | Transcript_ID | Exon_Rank | Genotype_Number [ | ERRORS | WARNINGS ] )' ">
##INFO=<ID=LOF,Number=.,Type=String,Description="Predicted loss of function effects for this variant. Format: 'Gene_Name | Gene_ID | Number_of_transcripts_in_gene | Percent_of_transcripts_affected' ">
##INFO=<ID=NMD,Number=.,Type=String,Description="Predicted nonsense mediated decay effects for this variant. Format: 'Gene_Name | Gene_ID | Number_of_transcripts_in_gene | Percent_of_transcripts_affected' ">
#CHROM	POS	ID	REF	ALT	QUAL	FILTER	INFO
2L	1175282	.	C	T	30	PASS	EFF=splice_region_variant(LOW|||c.1166C>T|1004|CG4887|protein_coding|CODING|FBtr0077966|7|1),splice_region_variant(LOW|||c.1166C>T|1004|CG4887|protein_coding|CODING|FBtr0331288|7|1),intron_variant(MODIFIER|||c.1166-5C>T|1004|CG4887|protein_coding|CODING|FBtr0077966|7|1),intron_variant(MODIFIER|||c.1166-5C>T|1004|CG4887|protein_coding|CODING|FBtr0331288|7|1)
2L	1947653	.	T	A	30	PASS	EFF=upstream_gene_variant(MODIFIER||925||235|CG33673|protein_coding|CODING|FBtr0307516||1),intergenic_region(MODIFIER||||||||||1)
2L	3422641	.	T	G	30	PASS	EFF=intron_variant(MODIFIER|||c.-125+119A>C|633|pgant2|protein_coding|CODING|FBtr0077592|1|1),intron_variant(MODIFIER|||c.-124-943A>C|633|pgant2|protein_coding|CODING|FBtr0303992|1|1)
2L	4207449	.	T	A	30	PASS	EFF=synonymous_variant(LOW|SILENT|ccA/ccT|p.Pro2416Pro/c.7248A>T|5147|ft|protein_coding|CODING|FBtr0077478|7|1)
2L	5305101	.	C	T	30	PASS	EFF=upstream_gene_variant(MODIFIER||549||729|vri|protein_coding|CODING|FBtr0079071||1),upstream_gene_variant(MODIFIER||549||729|vri|protein_coding|CODING|FBtr0300020||1),upstream_gene_variant(MODIFIER||549||729|vri|protein_coding|CODING|FBtr0346579||1),intron_variant(MODIFIER|||c.-215-2464C>T|610|vri|protein_coding|CODING|FBtr0342936|1|1),intron_variant(MODIFIER|||c.-215-2464C>T|610|vri|protein_c…
2L	6768801	.	G	T	30	PASS	EFF=intron_variant(MODIFIER|||c.982-9C>A|834|CG11321|protein_coding|CODING|FBtr0290295|7|1),intron_variant(MODIFIER|||c.1141-9C>A|2892|CG11321|protein_coding|CODING|FBtr0331216|7|1),intron_variant(MODIFIER|||c.982-9C>A|834|CG11321|protein_coding|CODING|FBtr0331217|7|1),intron_variant(MODIFIER|||c.1141-9C>A|2851|CG11321|protein_coding|CODING|FBtr0331218|7|1),intron_variant(MODIFIER|||c.1141-9C>A|8…
2L	7593947	.	A	G	30	PASS	EFF=intergenic_region(MODIFIER||||||||||1)
2L	8051163	.	A	C	30	PASS	EFF=synonymous_variant(LOW||ggC/ggC|p.Gly2186Gly/c.6558A>C|2753|CG7466|protein_coding|CODING|FBtr0344789|4|1|WARNING_REF_DOES_NOT_MATCH_GENOME),synonymous_variant(LOW||ggC/ggC|p.Gly2325Gly/c.6975A>C|2892|CG7466|protein_coding|CODING|FBtr0344788|5|1|WARNING_REF_DOES_NOT_MATCH_GENOME)
2L	8051175	.	G	A	30	PASS	EFF=synonymous_variant(LOW||gaA/gaA|p.Glu2190Glu/c.6570G>A|2753|CG7466|protein_coding|CODING|FBtr0344789|4|1|WARNING_REF_DOES_NOT_MATCH_GENOME),synonymous_variant(LOW||gaA/gaA|p.Glu2329Glu/c.6987G>A|2892|CG7466|protein_coding|CODING|FBtr0344788|5|1|WARNING_REF_DOES_NOT_MATCH_GENOME)
2L	8051196	.	G	T	30	PASS	EFF=synonymous_variant(LOW||gtT/gtT|p.Val2197Val/c.6591G>T|2753|CG7466|protein_coding|CODING|FBtr0344789|4|1|WARNING_REF_DOES_NOT_MATCH_GENOME),synonymous_variant(LOW||gtT/gtT|p.Val2336Val/c.7008G>T|2892|CG7466|protein_coding|CODING|FBtr0344788|5|1|WARNING_REF_DOES_NOT_MATCH_GENOME)
2L	8126379	.	A	G	30	PASS	EFF=synonymous_variant(LOW||ttC/ttC|p.Phe101Phe/c.303T>C|292|CG12375|protein_coding|CODING|FBtr0079642|2|1|WARNING_REF_DOES_NOT_MATCH_GENOME),upstream_gene_variant(MODIFIER||622||585|CG8668|protein_coding|CODING|FBtr0079576||1),upstream_gene_variant(MODIFIER||622||585|CG8668|protein_coding|CODING|FBtr0339671||1),downstream_gene_variant(MODIFIER||580||420|CG8673|protein_coding|CODING|FBtr0079575||…
2L	8246319	.	T	C	30	PASS	EFF=intron_variant(MODIFIER|||c.419-1096A>G|272|CG8086|protein_coding|CODING|FBtr0079620|3|1),intron_variant(MODIFIER|||c.497-1096A>G|298|CG8086|protein_coding|CODING|FBtr0079621|3|1),intron_variant(MODIFIER|||c.419-1096A>G|261|CG8086|protein_coding|CODING|FBtr0332362|3|1),intron_variant(MODIFIER|||c.4225+100A>G|1569|CG8086|protein_coding|CODING|FBtr0306391|11|1),intron_variant(MODIFIER|||c.4222+…
2L	8336756	.	C	T	30	PASS	EFF=intergenic_region(MODIFIER||||||||||1)
2L	8336762	.	G	A	30	PASS	EFF=intergenic_region(MODIFIER||||||||||1)
2L	8778319	.	A	T	30	PASS	EFF=synonymous_variant(LOW|SILENT|cgT/cgA|p.Arg812Arg/c.2436T>A|1007|CG9468|protein_coding|CODING|FBtr0079741|5|1)
2L	8779909	.	T	A	30	PASS	EFF=intron_variant(MODIFIER|||c.927-17A>T|1007|CG9468|protein_coding|CODING|FBtr0079741|3|1)
2L	8833205	.	G	A	30	PASS	EFF=intergenic_region(MODIFIER||||||||||1)
2L	8867771	.	C	T	30	PASS	EFF=upstream_gene_variant(MODIFIER||104|||CR44414||NON_CODING|FBtr0340257||1),upstream_gene_variant(MODIFIER||260|||CR45260||NON_CODING|FBtr0345454||1),downstream_gene_variant(MODIFIER||85||242|CG9483|protein_coding|CODING|FBtr0079738||1),intergenic_region(MODIFIER||||||||||1)
2L	8905484	.	A	G	30	PASS	EFF=intron_variant(MODIFIER|||c.-266+6634A>G|1930|CG34398|protein_coding|CODING|FBtr0303892|1|1),intron_variant(MODIFIER|||c.-266+6634A>G|1500|CG34398|protein_coding|CODING|FBtr0340259|1|1),intron_variant(MODIFIER|||c.-175+6634A>G|1784|CG34398|protein_coding|CODING|FBtr0112649|1|1),intron_variant(MODIFIER|||c.-175+6634A>G|1611|CG34398|protein_coding|CODING|FBtr0303891|1|1),intron_variant(MODIFIER…
2L	8964350	.	A	G	30	PASS	EFF=synonymous_variant(LOW|SILENT|gtA/gtG|p.Val536Val/c.1608A>G|618|CG32985|protein_coding|CODING|FBtr0079757|3|1),upstream_gene_variant(MODIFIER||632||591|CG32984|protein_coding|CODING|FBtr0079758||1)
2L	9513326	.	C	T	30	PASS	EFF=intron_variant(MODIFIER|||c.1023-1988C>T|1517|CG33298|protein_coding|CODING|FBtr0089853|2|1),intron_variant(MODIFIER|||c.1023-1988C>T|1494|CG33298|protein_coding|CODING|FBtr0089854|2|1),intron_variant(MODIFIER|||c.1023-1988C>T|1494|CG33298|protein_coding|CODING|FBtr0301064|3|1),intron_variant(MODIFIER|||c.1023-1988C>T|1494|CG33298|protein_coding|CODING|FBtr0301065|3|1)
2L	9774397	.	G	T	30	PASS	EFF=synonymous_variant(LOW|SILENT|Cga/Aga|p.Arg212Arg/c.634C>A|516|ppk11|protein_coding|CODING|FBtr0100831|1|1)
2L	9774398	.	A	G	30	PASS	EFF=synonymous_variant(LOW|SILENT|aaT/aaC|p.Asn211Asn/c.633T>C|516|ppk11|protein_coding|CODING|FBtr0100831|1|1)
2L	9774401	.	A	C	30	PASS	EFF=missense_variant(MODERATE|MISSENSE|gaT/gaG|p.Asp210Glu/c.630T>G|516|ppk11|protein_coding|CODING|FBtr0100831|1|1)
2L	9774416	.	T	C	30	PASS	EFF=synonymous_variant(LOW|SILENT|aaA/aaG|p.Lys205Lys/c.615A>G|516|ppk11|protein_coding|CODING|FBtr0100831|1|1)
2L	11207124	.	G	T	30	PASS	EFF=intergenic_region(MODIFIER||||||||||1)
2L	17081878	.	C	T	30	PASS	EFF=intergenic_region(MODIFIER||||||||||1)
2R	13848967	.	T	C	30	PASS	EFF=synonymous_variant(LOW|SILENT|acT/acC|p.Thr705Thr/c.2115T>C|912|CG30484|protein_coding|CODING|FBtr0331382|2|1),upstream_gene_variant(MODIFIER||915||975|CG30485|protein_coding|CODING|FBtr0087640||1)
2R	14711384	.	C	A	30	PASS	EFF=intron_variant(MODIFIER|||c.457+1428G>T|601|mspo|protein_coding|CODING|FBtr0087477|1|1),intron_variant(MODIFIER|||c.457+1428G>T|601|mspo|protein_coding|CODING|FBtr0345427|1|1)
2R	14738378	.	T	C	30	PASS	EFF=downstream_gene_variant(MODIFIER||981||762|CG12858|protein_coding|CODING|FBtr0309056||1),non_coding_exon_variant(MODIFIER|||n.865A>G||CR43428||NON_CODING|FBtr0309057|1|1|WARNING_REF_DOES_NOT_MATCH_GENOME)
2R	14738379	.	T	G	30	PASS	EFF=downstream_gene_variant(MODIFIER||980||762|CG12858|protein_coding|CODING|FBtr0309056||1),non_coding_exon_variant(MODIFIER|||n.864A>C||CR43428||NON_CODING|FBtr0309057|1|1|WARNING_REF_DOES_NOT_MATCH_GENOME)
2R	14738538	.	T	A	30	PASS	EFF=downstream_gene_variant(MODIFIER||821||762|CG12858|protein_coding|CODING|FBtr0309056||1),non_coding_exon_variant(MODIFIER|||n.705A>T||CR43428||NON_CODING|FBtr0309057|1|1)
2R	14755296	.	T	G	30	PASS	EFF=synonymous_variant(LOW|SILENT|ctA/ctC|p.Leu93Leu/c.279A>C|680|CG10151|protein_coding|CODING|FBtr0289934|2|1),synonymous_variant(LOW|SILENT|ctA/ctC|p.Leu93Leu/c.279A>C|668|CG10151|protein_coding|CODING|FBtr0087472|2|1),synonymous_variant(LOW|SILENT|ctA/ctC|p.Leu93Leu/c.279A>C|668|CG10151|protein_coding|CODING|FBtr0087471|2|1),synonymous_variant(LOW|SILENT|ctA/ctC|p.Leu93Leu/c.279A>C|668|CG1015…
2R	15391008	.	T	C	30	PASS	EFF=intergenic_region(MODIFIER||||||||||1)
2R	15392974	.	A	T	30	PASS	EFF=intergenic_region(MODIFIER||||||||||1)
2R	15438547	.	G	T	30	PASS	EFF=intron_variant(MODIFIER|||c.1911+14142G>T|818|CG43729|protein_coding|CODING|FBtr0330007|11|1),intron_variant(MODIFIER|||c.1911+14142G>T|1166|CG43729|protein_coding|CODING|FBtr0330011|11|1),intron_variant(MODIFIER|||c.1911+14142G>T|1951|CG43729|protein_coding|CODING|FBtr0330012|11|1),intron_variant(MODIFIER|||c.1911+14142G>T|1951|CG43729|protein_coding|CODING|FBtr0330013|11|1),intron_variant(M…
2R	15600559	.	T	A	30	PASS	EFF=intergenic_region(MODIFIER||||||||||1)
2R	15627574	.	A	G	30	PASS	EFF=intron_variant(MODIFIER|||c.60-3136A>G|85|CG42524|protein_coding|CODING|FBtr0300853|1|1),intron_variant(MODIFIER|||c.60-3136A>G|85|CG42524|protein_coding|CODING|FBtr0304712|1|1),intron_variant(MODIFIER|||c.60-3136A>G|85|CG42524|protein_coding|CODING|FBtr0340006|1|1)
2R	15916339	.	T	C	30	PASS	EFF=intron_variant(MODIFIER|||c.-678+5300A>G|1480|sli|protein_coding|CODING|FBtr0330729|1|1),intron_variant(MODIFIER|||c.-678+5300A>G|1504|sli|protein_coding|CODING|FBtr0330731|1|1),intron_variant(MODIFIER|||c.-678+5300A>G|1480|sli|protein_coding|CODING|FBtr0330732|1|1),intron_variant(MODIFIER|||c.-678+5300A>G|2157|sli|protein_coding|CODING|FBtr0330734|1|1),intron_variant(MODIFIER|||c.-740+5300A>…
2R	15938051	.	T	G	30	PASS	EFF=intron_variant(MODIFIER|||c.809+396A>C|309|Mlf|protein_coding|CODING|FBtr0087292|3|1),intron_variant(MODIFIER|||c.746+396A>C|288|Mlf|protein_coding|CODING|FBtr0306650|3|1),intron_variant(MODIFIER|||c.*140+64A>C|273|Mlf|protein_coding|CODING|FBtr0087293|4|1),intron_variant(MODIFIER|||c.803+396A>C|308|Mlf|protein_coding|CODING|FBtr0306649|3|1),intron_variant(MODIFIER|||c.804-172A>C|374|Mlf|prot…
2R	16526673	.	A	T	30	PASS	EFF=intron_variant(MODIFIER|||c.225+909A>T|697|Sema-2a|protein_coding|CODING|FBtr0087088|4|1),intron_variant(MODIFIER|||c.306+909A>T|724|Sema-2a|protein_coding|CODING|FBtr0087089|4|1),intron_variant(MODIFIER|||c.306+909A>T|724|Sema-2a|protein_coding|CODING|FBtr0087090|4|1),intron_variant(MODIFIER|||c.306+909A>T|724|Sema-2a|protein_coding|CODING|FBtr0345339|4|1)
2R	16809102	.	C	T	30	PASS	EFF=intergenic_region(MODIFIER||||||||||1)
2R	17067439	.	A	G	30	PASS	EFF=synonymous_variant(LOW|SILENT|taT/taC|p.Tyr788Tyr/c.2364T>C|1006|CG30460|protein_coding|CODING|FBtr0300958|7|1),synonymous_variant(LOW|SILENT|taT/taC|p.Tyr1493Tyr/c.4479T>C|1711|CG30460|protein_coding|CODING|FBtr0113378|9|1),synonymous_variant(LOW|SILENT|taT/taC|p.Tyr1650Tyr/c.4950T>C|1868|CG30460|protein_coding|CODING|FBtr0087010|8|1),synonymous_variant(LOW|SILENT|taT/taC|p.Tyr1262Tyr/c.3786…
2R	17287785	.	G	A	30	PASS	EFF=intron_variant(MODIFIER|||c.189+11722G>A|203|mbl|protein_coding|CODING|FBtr0086991|2|1),intron_variant(MODIFIER|||c.189+11722G>A|297|mbl|protein_coding|CODING|FBtr0086992|2|1),intron_variant(MODIFIER|||c.189+11722G>A|243|mbl|protein_coding|CODING|FBtr0086994|2|1),intron_variant(MODIFIER|||c.189+11722G>A|951|mbl|protein_coding|CODING|FBtr0306601|2|1),intron_variant(MODIFIER|||c.189+11722G>A|78…
2R	17460825	.	A	G	30	PASS	EFF=intron_variant(MODIFIER|||c.-701-1169A>G|512|CG14478|protein_coding|CODING|FBtr0086921|1|1),intron_variant(MODIFIER|||c.-701-1169A>G|512|CG14478|protein_coding|CODING|FBtr0345418|1|1),intron_variant(MODIFIER|||c.-701-1169A>G|512|CG14478|protein_coding|CODING|FBtr0345417|1|1),intron_variant(MODIFIER|||c.-702+159A>G|512|CG14478|protein_coding|CODING|FBtr0086922|1|1)
2R	17492704	.	T	C	30	PASS	EFF=synonymous_variant(LOW|SILENT|tgT/tgC|p.Cys488Cys/c.1464T>C|585|NT5E-2|protein_coding|CODING|FBtr0086927|7|1),synonymous_variant(LOW|SILENT|tgT/tgC|p.Cys488Cys/c.1464T>C|585|NT5E-2|protein_coding|CODING|FBtr0086928|7|1),upstream_gene_variant(MODIFIER||991||584|CG30103|protein_coding|CODING|FBtr0086929||1)
2R	17741741	.	G	A	30	PASS	EFF=synonymous_variant(LOW|SILENT|cgG/cgA|p.Arg497Arg/c.1491G>A|966|CG4996|protein_coding|CODING|FBtr0086864|5|1)
2R	17789246	.	C	T	30	PASS	EFF=5_prime_UTR_variant(MODIFIER||144|c.-144G>A|154|Ubc10|protein_coding|CODING|FBtr0089553|1|1),upstream_gene_variant(MODIFIER||433||784|CG5033|protein_coding|CODING|FBtr0089550||1),downstream_gene_variant(MODIFIER||690||700|aft|protein_coding|CODING|FBtr0089549||1)
2R	18124506	.	T	A	30	PASS	EFF=upstream_gene_variant(MODIFIER||633||914|stau|protein_coding|CODING|FBtr0086784||1),intron_variant(MODIFIER|||c.185+188A>T|1026|stau|protein_coding|CODING|FBtr0086783|2|1),intron_variant(MODIFIER|||c.185+188A>T|1025|stau|protein_coding|CODING|FBtr0301614|2|1)
2R	18124530	.	T	C	30	PASS	EFF=upstream_gene_variant(MODIFIER||657||914|stau|protein_coding|CODING|FBtr0086784||1),intron_variant(MODIFIER|||c.185+164A>G|1026|stau|protein_coding|CODING|FBtr0086783|2|1),intron_variant(MODIFIER|||c.185+164A>G|1025|stau|protein_coding|CODING|FBtr0301614|2|1)
2R	18124543	.	G	C	30	PASS	EFF=upstream_gene_variant(MODIFIER||670||914|stau|protein_coding|CODING|FBtr0086784||1),intron_variant(MODIFIER|||c.185+151C>G|1026|stau|protein_coding|CODING|FBtr0086783|2|1),intron_variant(MODIFIER|||c.185+151C>G|1025|stau|protein_coding|CODING|FBtr0301614|2|1)
2R	18124656	.	T	G	30	PASS	EFF=upstream_gene_variant(MODIFIER||783||914|stau|protein_coding|CODING|FBtr0086784||1),intron_variant(MODIFIER|||c.185+38A>C|1026|stau|protein_coding|CODING|FBtr0086783|2|1),intron_variant(MODIFIER|||c.185+38A>C|1025|stau|protein_coding|CODING|FBtr0301614|2|1)
2R	18137744	.	C	T	30	PASS	EFF=synonymous_variant(LOW|SILENT|ttC/ttT|p.Phe569Phe/c.1707C>T|1043|Pcl|protein_coding|CODING|FBtr0086735|3|1),synonymous_variant(LOW|SILENT|ttC/ttT|p.Phe569Phe/c.1707C>T|1043|Pcl|protein_coding|CODING|FBtr0329998|3|1)
2R	18142746	.	C	A	30	PASS	EFF=upstream_gene_variant(MODIFIER||56|||snoRNA:Psi18S-1347a||NON_CODING|FBtr0113513||1),upstream_gene_variant(MODIFIER||254|||snoRNA:Psi18S-1347b||NON_CODING|FBtr0113514||1),upstream_gene_variant(MODIFIER||433|||snoRNA:Psi18S-1347c||NON_CODING|FBtr0091610||1),intron_variant(MODIFIER|||c.167-667C>A|634|pAbp|protein_coding|CODING|FBtr0086736|2|1),intron_variant(MODIFIER|||c.167-667C>A|634|pAbp|pro…
2R	18142751	.	C	T	30	PASS	EFF=upstream_gene_variant(MODIFIER||51|||snoRNA:Psi18S-1347a||NON_CODING|FBtr0113513||1),upstream_gene_variant(MODIFIER||249|||snoRNA:Psi18S-1347b||NON_CODING|FBtr0113514||1),upstream_gene_variant(MODIFIER||428|||snoRNA:Psi18S-1347c||NON_CODING|FBtr0091610||1),intron_variant(MODIFIER|||c.167-662C>T|634|pAbp|protein_coding|CODING|FBtr0086736|2|1),intron_variant(MODIFIER|||c.167-662C>T|634|pAbp|pro…
2R	18167745	.	T	C	30	PASS	EFF=upstream_gene_variant(MODIFIER||605||668|Nup75|protein_coding|CODING|FBtr0086775||1),downstream_gene_variant(MODIFIER||668||669|Dgp-1|protein_coding|CODING|FBtr0086774||1),downstream_gene_variant(MODIFIER||998||669|Dgp-1|protein_coding|CODING|FBtr0086773||1),intergenic_region(MODIFIER||||||||||1)
2R	18409513	.	T	C	30	PASS	EFF=synonymous_variant(LOW|SILENT|ttT/ttC|p.Phe141Phe/c.423T>C|221|GstE9|protein_coding|CODING|FBtr0086677|1|1),downstream_gene_variant(MODIFIER||922||222|GstE8|protein_coding|CODING|FBtr0086676||1),downstream_gene_variant(MODIFIER||283||273|imd|protein_coding|CODING|FBtr0086725||1),downstream_gene_variant(MODIFIER||283||273|imd|protein_coding|CODING|FBtr0345891||1),downstream_gene_variant(MODIFI…
2R	18428913	.	G	C	30	PASS	EFF=synonymous_variant(LOW||acC/acC|p.Thr667Thr/c.2001G>C|1077|CG12263|protein_coding|CODING|FBtr0086691|4|1|WARNING_REF_DOES_NOT_MATCH_GENOME)
2R	18541385	.	T	A	30	PASS	EFF=intron_variant(MODIFIER|||c.-11+1092T>A|740|Rgk2|protein_coding|CODING|FBtr0112633|1|1),intron_variant(MODIFIER|||c.-8+1092T>A|742|Rgk2|protein_coding|CODING|FBtr0340386|1|1)
2R	18572616	.	G	T	30	PASS	EFF=intron_variant(MODIFIER|||c.-885+9914C>A|1237|GEFmeso|protein_coding|CODING|FBtr0340387|1|1),intron_variant(MODIFIER|||c.53-11448C>A|1549|GEFmeso|protein_coding|CODING|FBtr0300421|1|1),intron_variant(MODIFIER|||c.53-11448C>A|878|GEFmeso|protein_coding|CODING|FBtr0310055|1|1)
2R	18624435	.	C	A	30	PASS	EFF=missense_variant(MODERATE|MISSENSE|Gcc/Tcc|p.Ala157Ser/c.469G>T|684|Atg7|protein_coding|CODING|FBtr0086712|2|1),upstream_gene_variant(MODIFIER||814||738|Sec6|protein_coding|CODING|FBtr0086709||1),intron_variant(MODIFIER|||c.198-308G>T|510|Atg7|protein_coding|CODING|FBtr0086711|1|1)
2R	18710205	.	C	T	30	PASS	EFF=synonymous_variant(LOW|SILENT|ccG/ccA|p.Pro165Pro/c.495G>A|740|CG15087|protein_coding|CODING|FBtr0086647|2|1)
2R	18728742	.	A	T	30	PASS	EFF=stop_gained(HIGH|NONSENSE|tTg/tAg|p.Leu356*/c.1067T>A|387|List|protein_coding|CODING|FBtr0300863|4|1),synonymous_variant(LOW|SILENT|atT/atA|p.Ile369Ile/c.1107T>A|564|List|protein_coding|CODING|FBtr0300864|4|1),intron_variant(MODIFIER|||c.-681-3813A>T|605|Hs3st-A|protein_coding|CODING|FBtr0086608|2|1),intron_variant(MODIFIER|||c.-681-3813A>T|605|Hs3st-A|protein_coding|CODING|FBtr0345672|2|1)
2R	18744126	.	T	G	30	PASS	EFF=synonymous_variant(LOW|SILENT|ggA/ggC|p.Gly160Gly/c.480A>C|262|CG17821|protein_coding|CODING|FBtr0086642|3|1),upstream_gene_variant(MODIFIER||500||263|CG18609|protein_coding|CODING|FBtr0086643||1),intron_variant(MODIFIER|||c.-651-1140T>G|605|Hs3st-A|protein_coding|CODING|FBtr0086608|3|1),intron_variant(MODIFIER|||c.-651-1140T>G|605|Hs3st-A|protein_coding|CODING|FBtr0345672|3|1)
2R	18755952	.	T	A	30	PASS	EFF=splice_region_variant(LOW|||c.579T>A|535|Cyp12b2|protein_coding|CODING|FBtr0086609|4|1),intron_variant(MODIFIER|||c.579-4T>A|535|Cyp12b2|protein_coding|CODING|FBtr0086609|4|1)
2R	18784759	.	T	A	30	PASS	EFF=intron_variant(MODIFIER|||c.-70+1081T>A|1541|CG15080|protein_coding|CODING|FBtr0086613|1|1)
2R	19054336	.	A	C	30	PASS	EFF=downstream_gene_variant(MODIFIER||895||193|CG15116|protein_coding|CODING|FBtr0086596||1),intergenic_region(MODIFIER||||||||||1)
2R	19325175	.	G	A	30	PASS	EFF=intron_variant(MODIFIER|||c.54+23C>T|498|Rgk1|protein_coding|CODING|FBtr0334282|1|1),intron_variant(MODIFIER|||c.54+23C>T|514|Rgk1|protein_coding|CODING|FBtr0334284|1|1),intron_variant(MODIFIER|||c.2697+764C>T|1379|Rgk1|protein_coding|CODING|FBtr0334283|8|1)
2R	20125259	.	G	A	30	PASS	EFF=intergenic_region(MODIFIER||||||||||1)
2R	20162007	.	A	C	30	PASS	EFF=intergenic_region(MODIFIER||||||||||1)
2R	20162077	.	C	T	30	PASS	EFF=intergenic_region(MODIFIER||||||||||1)
2R	20162180	.	G	A	30	PASS	EFF=intergenic_region(MODIFIER||||||||||1)
2R	20274885	.	T	A	30	PASS	EFF=missense_variant(MODERATE|MISSENSE|Tcg/Acg|p.Ser46Thr/c.136T>A|425|CG11788|protein_coding|CODING|FBtr0086277|2|1),upstream_gene_variant(MODIFIER||386||587|CG10444|protein_coding|CODING|FBtr0086305||1)
2R	20276450	.	T	G	30	PASS	EFF=downstream_gene_variant(MODIFIER||308||425|CG11788|protein_coding|CODING|FBtr0086277||1),intron_variant(MODIFIER|||c.2183+17A>C|813|CG9143|protein_coding|CODING|FBtr0086304|4|1)
2R	20283335	.	T	A	30	PASS	EFF=synonymous_variant(LOW|SILENT|gcA/gcT|p.Ala1055Ala/c.3165A>T|1449|CG16868|protein_coding|CODING|FBtr0086302|6|1)
2R	20694393	.	G	A	30	PASS	EFF=downstream_gene_variant(MODIFIER||654||220|CG13438|protein_coding|CODING|FBtr0086237||1),intergenic_region(MODIFIER||||||||||1)
2R	20696270	.	G	T	30	PASS	EFF=intergenic_region(MODIFIER||||||||||1)
2R	21537455	.	T	C	30	PASS	EFF=missense_variant(MODERATE|MISSENSE|Aca/Gca|p.Thr145Ala/c.433A>G|284|CG30287|protein_coding|CODING|FBtr0071695|3|1),upstream_gene_variant(MODIFIER||660||277|CG30286|protein_coding|CODING|FBtr0300951||1),upstream_gene_variant(MODIFIER||660||152|CG30286|protein_coding|CODING|FBtr0300952||1),downstream_gene_variant(MODIFIER||795||292|CG33226|protein_coding|CODING|FBtr0308585||1),intron_variant(MO…
2R	21750916	.	A	C	30	PASS	EFF=intergenic_region(MODIFIER||||||||||1)
2R	21826572	.	A	G	30	PASS	EFF=missense_variant(MODERATE|MISSENSE|tTg/tCg|p.Leu1115Ser/c.3344T>C|2979|CG13492|protein_coding|CODING|FBtr0302446|4|1)
3L	565009	.	G	A	30	PASS	EFF=intron_variant(MODIFIER|||c.290-4518G>A|1340|hipk|protein_coding|CODING|FBtr0072551|2|1),intron_variant(MODIFIER|||c.290-4518G>A|1340|hipk|protein_coding|CODING|FBtr0072552|2|1)
3L	844860	.	G	C	30	PASS	EFF=synonymous_variant(LOW|SILENT|ctG/ctC|p.Leu146Leu/c.438G>C|1978|CG13889|protein_coding|CODING|FBtr0332752|2|1),synonymous_variant(LOW|SILENT|ctG/ctC|p.Leu146Leu/c.438G>C|1978|CG13889|protein_coding|CODING|FBtr0072586|2|1)
3L	2582994	.	A	G	30	PASS	EFF=intron_variant(MODIFIER|||c.78+2611T>C|1504|msn|protein_coding|CODING|FBtr0072956|2|1),intron_variant(MODIFIER|||c.78+2611T>C|1200|msn|protein_coding|CODING|FBtr0072957|2|1),intron_variant(MODIFIER|||c.78+2611T>C|1102|msn|protein_coding|CODING|FBtr0072958|2|1),intron_variant(MODIFIER|||c.78+2611T>C|1102|msn|protein_coding|CODING|FBtr0072959|2|1),intron_variant(MODIFIER|||c.78+2611T>C|1404|msn…
3L	3900530	.	A	T	30	PASS	EFF=synonymous_variant(LOW|SILENT|atT/atA|p.Ile410Ile/c.1230T>A|763|Ubi-p63E|protein_coding|CODING|FBtr0333142|2|1),synonymous_variant(LOW|SILENT|atT/atA|p.Ile410Ile/c.1230T>A|763|Ubi-p63E|protein_coding|CODING|FBtr0073179|2|1),synonymous_variant(LOW|SILENT|atT/atA|p.Ile410Ile/c.1230T>A|763|Ubi-p63E|protein_coding|CODING|FBtr0073178|3|1),synonymous_variant(LOW|SILENT|atT/atA|p.Ile410Ile/c.1230T>A…
3L	4291434	.	C	T	30	PASS	EFF=3_prime_UTR_variant(MODIFIER||80|c.*80G>A|152|CG15012|protein_coding|CODING|FBtr0300776|4|1),downstream_gene_variant(MODIFIER||223||622|Hexo1|protein_coding|CODING|FBtr0073235||1),downstream_gene_variant(MODIFIER||223||606|Hexo1|protein_coding|CODING|FBtr0073237||1),downstream_gene_variant(MODIFIER||223||606|Hexo1|protein_coding|CODING|FBtr0300774||1),downstream_gene_variant(MODIFIER||223||60…
3L	5354233	.	G	A	30	PASS	EFF=intron_variant(MODIFIER|||c.-461+382C>T|658|lama|protein_coding|CODING|FBtr0077160|1|1),intron_variant(MODIFIER|||c.-461+1461C>T|658|lama|protein_coding|CODING|FBtr0077159|1|1),intron_variant(MODIFIER|||c.-570+382C>T|658|lama|protein_coding|CODING|FBtr0333595|1|1)
3L	5564299	.	C	T	30	PASS	EFF=upstream_gene_variant(MODIFIER||608||416|Sucb|protein_coding|CODING|FBtr0077134||1),upstream_gene_variant(MODIFIER||608||416|Sucb|protein_coding|CODING|FBtr0344756||1),upstream_gene_variant(MODIFIER||932||79|bc10|protein_coding|CODING|FBtr0077084||1),intron_variant(MODIFIER|||c.407-27C>T|302|Sras|protein_coding|CODING|FBtr0077083|1|1)
3L	5780305	.	G	T	30	PASS	EFF=upstream_gene_variant(MODIFIER||714||533|Myt1|protein_coding|CODING|FBtr0077118||1),non_coding_exon_variant(MODIFIER|||n.432C>A||CR45026||NON_CODING|FBtr0344249|3|1),non_coding_exon_variant(MODIFIER|||n.501C>A||CR45026||NON_CODING|FBtr0344248|2|1)
3L	5790251	.	T	C	30	PASS	EFF=3_prime_UTR_variant(MODIFIER||294|c.*294A>G|1044|Bre1|protein_coding|CODING|FBtr0344538|4|1),3_prime_UTR_variant(MODIFIER||294|c.*294A>G|1044|Bre1|protein_coding|CODING|FBtr0077116|4|1)
3L	13907523	.	T	A	30	PASS	EFF=3_prime_UTR_variant(MODIFIER||244|c.*244A>T|973|Rgl|protein_coding|CODING|FBtr0330186|7|1),3_prime_UTR_variant(MODIFIER||301|c.*301A>T|774|Rgl|protein_coding|CODING|FBtr0075796|7|1),3_prime_UTR_variant(MODIFIER||301|c.*301A>T|954|Rgl|protein_coding|CODING|FBtr0075793|7|1),3_prime_UTR_variant(MODIFIER||301|c.*301A>T|774|Rgl|protein_coding|CODING|FBtr0075794|7|1),3_prime_UTR_variant(MODIFIER||3…
3R	13116942	.	G	T	30	PASS	EFF=intron_variant(MODIFIER|||c.1969+2702G>T|1384|timeout|protein_coding|CODING|FBtr0082712|11|1)
3R	13184446	.	C	T	30	PASS	EFF=intergenic_region(MODIFIER||||||||||1)
3R	18144665	.	A	G	30	PASS	EFF=intergenic_region(MODIFIER||||||||||1)
3R	30244888	.	A	G	30	PASS	EFF=intron_variant(MODIFIER|||c.663-188T>C|418|CG9733|protein_coding|CODING|FBtr0085638|2|1),intron_variant(MODIFIER|||c.660-188T>C|417|CG9733|protein_coding|CODING|FBtr0345122|2|1)
3R	30752770	.	C	T	30	PASS	EFF=intergenic_region(MODIFIER||||||||||1)
3R	31320864	.	A	T	30	PASS	EFF=intron_variant(MODIFIER|||c.-77+8933A>T|1517|CG34347|protein_coding|CODING|FBtr0290046|1|1),intron_variant(MODIFIER|||c.-77+8933A>T|1512|CG34347|protein_coding|CODING|FBtr0334566|2|1)
X	1238335	.	C	G	30	PASS	EFF=missense_variant(MODERATE|MISSENSE|aGt/aCt|p.Ser483Thr/c.1448G>C|861|CG11403|protein_coding|CODING|FBtr0070245|1|1)
X	1238401	.	C	T	30	PASS	EFF=missense_variant(MODERATE|MISSENSE|cGt/cAt|p.Arg461His/c.1382G>A|861|CG11403|protein_coding|CODING|FBtr0070245|1|1)
X	1240743	.	C	T	30	PASS	EFF=upstream_gene_variant(MODIFIER||859||861|CG11403|protein_coding|CODING|FBtr0070245||1),intergenic_region(MODIFIER||||||||||1)
X	2084127	.	C	A	30	PASS	EFF=intron_variant(MODIFIER|||c.554+2468C>A|474|Unc-76|protein_coding|CODING|FBtr0070376|1|1),intron_variant(MODIFIER|||c.554+2468C>A|474|Unc-76|protein_coding|CODING|FBtr0070377|2|1),intron_variant(MODIFIER|||c.554+2468C>A|474|Unc-76|protein_coding|CODING|FBtr0333754|1|1)
X	17245585	.	A	G	30	PASS	EFF=3_prime_UTR_variant(MODIFIER||784|c.*713T>C|160|CG42854|protein_coding|CODING|FBtr0304020|4|1),upstream_gene_variant(MODIFIER||584||976|CG8915|protein_coding|CODING|FBtr0074447||1),upstream_gene_variant(MODIFIER||584||976|CG8915|protein_coding|CODING|FBtr0339780||1),intron_variant(MODIFIER|||c.-14-4203A>G|1790|f|protein_coding|CODING|FBtr0304067|1|1)
dmel_mitochondrion_genome	10225	.	C	T	30	PASS	EFF=synonymous_variant(LOW|SILENT|Cta/Tta|p.Leu86Leu/c.256C>T|175|mt:ND6|protein_coding|CODING|FBtr0100883|1|1),upstream_gene_variant(MODIFIER||273||379|mt:Cyt-b|protein_coding|CODING|FBtr0100884||1|WARNING_TRANSCRIPT_MULTIPLE_STOP_CODONS),upstream_gene_variant(MODIFIER||681||445|mt:ND4|protein_coding|CODING|FBtr0100879||1|WARNING_TRANSCRIPT_INCOMPLETE),upstream_gene_variant(MODIFIER||391||96|mt:…
dmel_mitochondrion_genome	10681	.	T	C	30	PASS	EFF=synonymous_variant(LOW||Cta/Cta|p.Leu62Leu/c.184T>C|379|mt:Cyt-b|protein_coding|CODING|FBtr0100884|1|1|WARNING_TRANSCRIPT_MULTIPLE_STOP_CODONS+WARNING_REF_DOES_NOT_MATCH_GENOME),upstream_gene_variant(MODIFIER||847||96|mt:ND4L|protein_coding|CODING|FBtr0100880||1|WARNING_TRANSCRIPT_MULTIPLE_STOP_CODONS),upstream_gene_variant(MODIFIER||718|||mt:tRNA:P||NON_CODING|FBtr0100882||1),upstream_gene_v…
dmel_mitochondrion_genome	12131	.	C	T	30	PASS	EFF=synonymous_variant(LOW||atA/atA|p.Met176Met/c.528G>A|312|mt:ND1|protein_coding|CODING|FBtr0100886|1|1|WARNING_TRANSCRIPT_MULTIPLE_STOP_CODONS+WARNING_REF_DOES_NOT_MATCH_GENOME),downstream_gene_variant(MODIFIER||494||379|mt:Cyt-b|protein_coding|CODING|FBtr0100884||1|WARNING_TRANSCRIPT_MULTIPLE_STOP_CODONS),downstream_gene_variant(MODIFIER||538|||mt:tRNA:L:CUN||NON_CODING|FBtr0100887||1),downst…
dmel_mitochondrion_genome	12344	.	C	A	30	PASS	EFF=synonymous_variant(LOW||ggT/ggT|p.Gly105Gly/c.315G>T|312|mt:ND1|protein_coding|CODING|FBtr0100886|1|1|WARNING_TRANSCRIPT_MULTIPLE_STOP_CODONS+WARNING_REF_DOES_NOT_MATCH_GENOME),downstream_gene_variant(MODIFIER||707||379|mt:Cyt-b|protein_coding|CODING|FBtr0100884||1|WARNING_TRANSCRIPT_MULTIPLE_STOP_CODONS),downstream_gene_variant(MODIFIER||325|||mt:tRNA:L:CUN||NON_CODING|FBtr0100887||1),downst…
dmel_mitochondrion_genome	2661	.	C	T	30	PASS	EFF=synonymous_variant(LOW|SILENT|ccC/ccT|p.Pro396Pro/c.1188C>T|512|mt:CoI|protein_coding|CODING|FBtr0100861|1|1|WARNING_TRANSCRIPT_MULTIPLE_STOP_CODONS),upstream_gene_variant(MODIFIER||351|||mt:tRNA:L:UUR||NON_CODING|FBtr0100862||1),upstream_gene_variant(MODIFIER||422||228|mt:CoII|protein_coding|CODING|FBtr0100863||1|WARNING_TRANSCRIPT_INCOMPLETE)
dmel_mitochondrion_genome	3583	.	T	C	30	PASS	EFF=synonymous_variant(LOW|SILENT|gcT/gcC|p.Ala167Ala/c.501T>C|228|mt:CoII|protein_coding|CODING|FBtr0100863|1|1|WARNING_TRANSCRIPT_INCOMPLETE),upstream_gene_variant(MODIFIER||185|||mt:tRNA:K||NON_CODING|FBtr0100864||1),upstream_gene_variant(MODIFIER||257|||mt:tRNA:D||NON_CODING|FBtr0100865||1),upstream_gene_variant(MODIFIER||324||54|mt:ATPase8|protein_coding|CODING|FBtr0100866||1|WARNING_TRANSCR…
dmel_mitochondrion_genome	4247	.	C	T	30	PASS	EFF=synonymous_variant(LOW|SILENT|ggA/ggT|p.Gly62Gly/c.186C>T|225|mt:ATPase6|protein_coding|CODING|FBtr0100867|1|1|WARNING_TRANSCRIPT_MULTIPLE_STOP_CODONS+WARNING_REF_DOES_NOT_MATCH_GENOME),upstream_gene_variant(MODIFIER||489||263|mt:CoIII|protein_coding|CODING|FBtr0100868||1|WARNING_TRANSCRIPT_MULTIPLE_STOP_CODONS),downstream_gene_variant(MODIFIER||477||228|mt:CoII|protein_coding|CODING|FBtr0100…
dmel_mitochondrion_genome	5177	.	G	A	30	PASS	EFF=missense_variant(MODERATE|MISSENSE|Gcc/Acc|p.Ala148Thr/c.442G>A|263|mt:CoIII|protein_coding|CODING|FBtr0100868|1|1|WARNING_TRANSCRIPT_MULTIPLE_STOP_CODONS),upstream_gene_variant(MODIFIER||366|||mt:tRNA:G||NON_CODING|FBtr0100869||1),upstream_gene_variant(MODIFIER||431||118|mt:ND3|protein_coding|CODING|FBtr0100870||1|WARNING_TRANSCRIPT_MULTIPLE_STOP_CODONS),upstream_gene_variant(MODIFIER||804||…
dmel_mitochondrion_genome	5396	.	C	T	30	PASS	EFF=synonymous_variant(LOW||Tta/Tta|p.Leu221Leu/c.661C>T|263|mt:CoIII|protein_coding|CODING|FBtr0100868|1|1|WARNING_TRANSCRIPT_MULTIPLE_STOP_CODONS+WARNING_REF_DOES_NOT_MATCH_GENOME),upstream_gene_variant(MODIFIER||147|||mt:tRNA:G||NON_CODING|FBtr0100869||1),upstream_gene_variant(MODIFIER||212||118|mt:ND3|protein_coding|CODING|FBtr0100870||1|WARNING_TRANSCRIPT_MULTIPLE_STOP_CODONS),upstream_gene_…
dmel_mitochondrion_genome	6301	.	C	A	30	PASS	EFF=downstream_gene_variant(MODIFIER||36|||mt:tRNA:F||NON_CODING|FBtr0100876||1),downstream_gene_variant(MODIFIER||101||573|mt:ND5|protein_coding|CODING|FBtr0100877||1|WARNING_TRANSCRIPT_INCOMPLETE),downstream_gene_variant(MODIFIER||774||263|mt:CoIII|protein_coding|CODING|FBtr0100868||1|WARNING_TRANSCRIPT_MULTIPLE_STOP_CODONS),downstream_gene_variant(MODIFIER||694|||mt:tRNA:G||NON_CODING|FBtr0100…
dmel_mitochondrion_genome	6982	.	G	A	30	PASS	EFF=synonymous_variant(LOW||taT/taT|p.Tyr381Tyr/c.1143C>T|573|mt:ND5|protein_coding|CODING|FBtr0100877|1|1|WARNING_TRANSCRIPT_INCOMPLETE+WARNING_REF_DOES_NOT_MATCH_GENOME),upstream_gene_variant(MODIFIER||581|||mt:tRNA:F||NON_CODING|FBtr0100876||1),downstream_gene_variant(MODIFIER||937|||mt:tRNA:A||NON_CODING|FBtr0100871||1),downstream_gene_variant(MODIFIER||864|||mt:tRNA:R||NON_CODING|FBtr0100872…
dmel_mitochondrion_genome	7870	.	G	A	30	PASS	EFF=synonymous_variant(LOW|SILENT|ttC/ttT|p.Phe85Phe/c.255C>T|573|mt:ND5|protein_coding|CODING|FBtr0100877|1|1|WARNING_TRANSCRIPT_INCOMPLETE),downstream_gene_variant(MODIFIER||270|||mt:tRNA:H||NON_CODING|FBtr0100878||1),downstream_gene_variant(MODIFIER||336||445|mt:ND4|protein_coding|CODING|FBtr0100879||1|WARNING_TRANSCRIPT_INCOMPLETE)
dmel_mitochondrion_genome	8267	.	C	A	30	PASS	EFF=missense_variant(MODERATE|MISSENSE|ttG/ttT|p.Leu426Phe/c.1278G>T|445|mt:ND4|protein_coding|CODING|FBtr0100879|1|1|WARNING_TRANSCRIPT_INCOMPLETE),upstream_gene_variant(MODIFIER||143||573|mt:ND5|protein_coding|CODING|FBtr0100877||1|WARNING_TRANSCRIPT_INCOMPLETE),upstream_gene_variant(MODIFIER||62|||mt:tRNA:H||NON_CODING|FBtr0100878||1)
dmel_mitochondrion_genome	8826	.	A	G	30	PASS	EFF=missense_variant(MODERATE|MISSENSE|tTa/tCa|p.Leu240Ser/c.719T>C|445|mt:ND4|protein_coding|CODING|FBtr0100879|1|1|WARNING_TRANSCRIPT_INCOMPLETE),upstream_gene_variant(MODIFIER||702||573|mt:ND5|protein_coding|CODING|FBtr0100877||1|WARNING_TRANSCRIPT_INCOMPLETE),upstream_gene_variant(MODIFIER||621|||mt:tRNA:H||NON_CODING|FBtr0100878||1),downstream_gene_variant(MODIFIER||718||96|mt:ND4L|protein_c…
dmel_mitochondrion_genome	8875	.	A	G	30	PASS	EFF=synonymous_variant(LOW||Cta/Cta|p.Leu224Leu/c.670T>C|445|mt:ND4|protein_coding|CODING|FBtr0100879|1|1|WARNING_TRANSCRIPT_INCOMPLETE+WARNING_REF_DOES_NOT_MATCH_GENOME),upstream_gene_variant(MODIFIER||751||573|mt:ND5|protein_coding|CODING|FBtr0100877||1|WARNING_TRANSCRIPT_INCOMPLETE),upstream_gene_variant(MODIFIER||670|||mt:tRNA:H||NON_CODING|FBtr0100878||1),upstream_gene_variant(MODIFIER||962|…
dmel_mitochondrion_genome	8981	.	C	T	30	PASS	EFF=synonymous_variant(LOW|SILENT|ttG/ttA|p.Leu188Leu/c.564G>A|445|mt:ND4|protein_coding|CODING|FBtr0100879|1|1|WARNING_TRANSCRIPT_INCOMPLETE),upstream_gene_variant(MODIFIER||857||573|mt:ND5|protein_coding|CODING|FBtr0100877||1|WARNING_TRANSCRIPT_INCOMPLETE),upstream_gene_variant(MODIFIER||776|||mt:tRNA:H||NON_CODING|FBtr0100878||1),upstream_gene_variant(MODIFIER||856|||mt:tRNA:T||NON_CODING|FBtr…

## Sheet: MB_C1.13 candidate genes
CG13950
CG15824
CG31935
CG31689
CG3921
Tps1
dp
Cyp28d1
CG14015
CG9147
CG11221
milt
Aats-ala
CG44153
Pten
Lip1
CG31870
CG6508
snoRNA:Me18S-G642
CG6488
Pde1c
Cry
CR44587
bun
nub
TM9SF4
nAChRalpha5
wb
CR43640
elB
CG3473
CycE
Gli
beat-Ib
Cyp303a1
CG5888
CG5953
snoRNA:Me28S-C1237
CG42389
Trpgamma
ChLD3
Dif
dl
CadN
CadN2
Fas3
Lar
CG10462
CG10631
CG31676
CR44918
jing
CR44442
Tsp42Ed
pk
CG33140
CG30385
CG30384
Dscam1
Eaf
wech
Corin
CG12826
mus205
mtt
CG8172
CG8170
l_2_03659
Mmp2
Mef2
Pka-R2
stan
CG12325
luna
Drip
CR44305
Cam
Psc
CG42807
Asx
Cyp6a19
hbs
Trpm
CG33462
sli
ATPCL
CG9068
mbl
sbb
CG43066
CG10924
hppy
sm
CG11041
dpr
ktub
CG30389
CG42672
CG30394
dom
snoRNA:Me28S-A2589b
CG10494
CG30278
CG5539
CG5549
eIF6
gek
spag
CG11537
RhoGEF4
Rint1
CG14834
CG8541
CG42590
CG32066
Blos4
CG7616
CR45158
CG6931
CG5626
app
CG10418
CG17177
RhoGAP71E
Lmpt
Ugt
Est-Q
Chro
CG1090
CG2082
Nlg1
CG2616
CG18745
CG34384
CG43618
CG14692
CG34114
NK7.1
jvl
Rbp
Sb
cher
Edg91
CG7794
CG3773
Hmgcr
Fur1
Nf1
CG14257
sdk
su_w[a]_
hfw
CG14797
CG42666
CG4194
CG4025
Ilp6
egh
Syx4
CtsB1
CG7332
mt:Cyt-b
mt:ND1
mt:CoII
mt:ATPase6
mt:CoIII
mt:ND4
haf
CG3652
Hel25E
CG31869
Nos
ab
CR44846
CR44917
CG33461
CR43728
Ssrp
ytr
CG1291
CG8602
Srp19
tRNA:CR32363
CG32091
CG6938
Adk1
CR45444
Glg1
CG43061
CG7785
CG5250
unc79
CG11638
CG4199
CG16903
phl
mt:ND4L
mt:tRNA:K
mt:tRNA:G
mt:ND5
CG17294
CG34109
Lip2
heix
CG13744
CG13747
Cyp6a23
MESK2
CG42591
CG6418
CG13474
CR44260
CG43060
CG14329
CG3740
CG32809
crm
mt:tRNA:P
mt:tRNA:L:CUN
mt:tRNA:D
mt:ND3
mt:tRNA:H
ari-2
CG13561
Ect4
ome
mt:tRNA:S:UCN
mt:ATPase8
mt:tRNA:A
mt:tRNA:T
Fbw5
CG8320
Oatp58Da
kirre
CG11103
mt:lrRNA
mt:tRNA:R
mt:ND6
mt:CoI
mt:tRNA:N
Nf-YB
mt:tRNA:L:UUR
mt:tRNA:S:AGY
mt:tRNA:E
mt:tRNA:F

## Sheet: MB_C2.13 candidate genes
ds
CG34340
CG3921
Reph
pgant5
Gr28b
CG34398
Npc1a
Mdh1
Cry
CG42784
CG13283
CG10947
jing
CG30496
l_2_03659
Tsf3
CG10505
CG30287
Fili
CG13501
CG11474
mei-S332
a
Vps35
Gp150
Liprin-gamma
CG4554
CG4294
CG33143
Ugt58Fa
CG2852
jbug
Nup214
Unc-89
Rap2l
CG3894
hng3
CG13900
trio
Spn
CG43444
CG14969
Drsl6
Fit1
Rop
mas
Ero1L
CG18675
CG43367
DopEcR
CG13720
RhoGEF64C
Sucb
l_3_psg2
spo
Sse
sif
DnaJ-1
PVRAP
CG42269
CG42747
form3
CG14826
Cyp4d8
Cpr66Cb
Gug
CG6576
path
alphaTub67C
CG5897
CG5718
Ncc69
tral
CG42588
CG10960
CG10738
ome
cp309
CG16959
CG7011
CG13024
CG13724
mura
CG8319
Ugt86Dd
cv-c
l_3_07882
Gfrl
CG42335
CASK
CG1894
spg
CG14521
CG34300
CG11317
pcx
CG2662
CG32758
Cht6
rdgB
hiw
para
kek5
CG14227
Mer
CR45082
mt:Cyt-b
mt:ND1
mt:CoI
mt:CoII
mt:ATPase6
mt:CoIII
mt:ND5
mt:ND4
CG3407
CG30493
CG15706
MFS16
CG30286
Snp
CR44756
GstE12
Drsl1
Pex2
Fhos
CG6767
CG44837
CG11588
CG6878
CG13725
Crc
P5cr-2
Ubqn
mt:ND4L
mt:tRNA:L:UUR
mt:tRNA:K
mt:tRNA:G
mt:tRNA:F
mt:tRNA:H
da
CG2921
Vrp1
CG4269
CG30195
snoRNA:Me28S-C788a
snoRNA:Me28S-G3113a
snoRNA:Me5.8S-G74
kst
CG14995
Ras64B
Teh4
Sras
CG10592
msl-3
hdc
CG15553
mt:tRNA:P
mt:tRNA:L:CUN
mt:tRNA:D
mt:ND3
mt:tRNA:A
Egfr
snoRNA:Me28S-G3113b
CR45184
mt:tRNA:S:UCN
mt:ATPase8
mt:tRNA:R
mt:tRNA:T
CG4329
CG10089
mt:lrRNA
mt:tRNA:N
mt:ND6
Cep135
mt:tRNA:S:AGY
mt:tRNA:E

## Sheet: MB_C3.13 candidate genes
CG3544
CG3662
tho2
CG31690
CG2991
lilli
toc
fred
CG3714
ft
Atet
ine
dp
Bsg25A
CG15630
pog
CG44001
Msp300
nompC
bchs
CG9527
Tep3
Dref
CG17211
CR45715
CG17337
CR44204
Aldh-III
Or43b
CG30381
drosha
CG12910
Ndg
CG11883
CG30015
CG34224
alphaTry
Tsp47F
DUBAI
Amph
Prosap
CG8468
chn
sli
Nox
S-Lap8
CCHa1-R
eIF3-S8
CG4996
CG5009
sbb
GstE3
GstE7
GstE8
CG15071
ena
qsm
CG30152
CG4050
CG42672
dom
CG13492
CG34370
CG4610
Sesn
CG13894
CR44537
trio
bab1
GV1
Ack
Meics
blue
nuf
Sytbeta
CG4998
CG18223
CG18135
CG43427
Glut4EF
Spn85F
hth
ClC-a
Cad87A
trx
su_Hw_
kibra
CG6966
tefu
Su_var_3-9
CG14864
Zip88E
AdamTS-A
CG14877
cher
CG31269
Det
sr
CG14315
Arp5
CG12321
Fancd2
CG6985
rumi
Rpt5
CG31038
CG31202
eIF2B-alpha
CG15523
AdoR
Fas2
Vsx2
CG42492
CG42699
CG4766
CG3192
fz4
nAChRalpha3
mt:Cyt-b
mt:ND1
mt:CoI
mt:CoII
mt:ATPase6
mt:CoIII
mt:ND5
mt:ND4
CG11929
Ntl
qua
so
Cul1
CG8728
CG13217
epsilonTry
CG33459
CG6401
OstDelta
CR43687
GstE9
Sik3
px
Chd64
Gr85a
eIF-2gamma
CG17477
m-cup
CR45104
MED17
vret
Hrd3
Cog7
l_1_G0255
mt:ND4L
mt:tRNA:L:UUR
mt:tRNA:K
mt:tRNA:G
mt:tRNA:F
mt:tRNA:H
CR44990
rnh1
CG34222
CG13216
ssp2
CG6839
CG7530
CG31265
CG31139
CG8300
mt:tRNA:P
mt:tRNA:L:CUN
mt:tRNA:D
mt:ND3
mt:tRNA:A
GlyP
tRNA:Y1:28C
Opa1
GstE6
imd
Nxf3
CG3819
Set
CR44238
CG5285
mt:tRNA:S:UCN
mt:ATPase8
mt:tRNA:R
mt:tRNA:T
Gene_FBtr0304206
CR45149
snoRNA:Psi18S-1389a
CR44156
mt:lrRNA
mt:tRNA:N
mt:ND6
CG33995
CG34256
mt:tRNA:S:AGY
mt:tRNA:E
lectin-24Db
CG44000
cal1
CG9121

## Sheet: MB_C4.13 candidate genes
dpr2
nAChRalpha5
CG10348
CG17321
Tango6
CG10268
step
CR44919
CG2064
CG1399
Dgk
snoRNA:gcl-a
brp
luna
mahj
stum
gek
CR45402
CG32250
CG15014
Cip4
CG42540
RhoGEF64C
CG13708
CG17150
Con
Aats-ala-m
shep
lama
CG34342
spo
lin-28
sif
CG42272
CG5568
Gug
CG13308
CG13309
Ir67c
caps
CG13737
l_3_72Dp
dsx-c73A
pum
Nup93-2
CG6040
CG4538
CG17843
CG31145
PI4KIIIalpha
sgg
CG3106
CG8316
CG8034
kek5
Inx6
mt:ND4
Nak
Hakai
CR44917
CG2065
gcl
CR45401
S6k
CG32024
dysc
MED10
CG33158
CG14860
CG6690
mt:ND5
CR44918
CG10306
CG10592
mt:tRNA:H
Hsc20
mt:ND4L

## Sheet: MB_C5.13 candidate genes
CG4887
CG33673
pgant2
ft
vri
CG11321
CG7466
CG12375
CG8086
CG9468
CR44414
CG34398
CG32985
CG33298
ppk11
CG30484
mspo
CG12858
CG10151
CG43729
CG42524
sli
Mlf
Sema-2a
CG30460
mbl
CG14478
NT5E-2
CG4996
Ubc10
stau
Pcl
snoRNA:Psi18S-1347a
Nup75
GstE9
CG12263
Rgk2
GEFmeso
Atg7
CG15087
List
CG17821
Cyp12b2
CG15080
CG15116
Rgk1
CG11788
CG16868
CG13438
CG30287
CG13492
hipk
CG13889
msn
Ubi-p63E
CG15012
lama
Sucb
Myt1
Bre1
Rgl
timeout
CG9733
CG34347
CG11403
Unc-76
CG42854
mt:ND6
mt:Cyt-b
mt:ND1
mt:CoI
mt:CoII
mt:ATPase6
mt:CoIII
mt:tRNA:F
mt:ND5
mt:ND4
CG8668
CR45260
CG32984
CG30485
CR43428
CG5033
snoRNA:Psi18S-1347b
Dgp-1
GstE8
Sec6
CG18609
CG10444
CG9143
CG30286
Hexo1
CR45026
CG8915
mt:ND4L
mt:tRNA:L:UUR
mt:tRNA:K
mt:tRNA:G
mt:tRNA:H
CG9483
CG30103
aft
snoRNA:Psi18S-1347c
imd
Hs3st-A
bc10
mt:tRNA:P
mt:tRNA:L:CUN
mt:tRNA:D
mt:ND3
mt:tRNA:A
CG8673
pAbp
CG33226
Sras
f
mt:tRNA:S:UCN
mt:ATPase8
mt:tRNA:R
mt:tRNA:T
Egfr
mt:lrRNA
mt:tRNA:N
CR44373
mt:tRNA:S:AGY
mt:tRNA:E
CG6967

[truncated: 10 more sheets: MB_D1.13 SNPEff candidate SNPs, MB_D2.13 SNPEff candidate SNPs, MB_D3.13 SNPEff candidate SNPs, MB_D4.13 SNPEff candidate SNPs, MB_D5.13 SNPEff candidate SNPs, MB_D1.13 candidate genes, MB_D2.13 candidate genes, MB_D3.13 candidate genes, MB_D4.13 candidate genes, MB_D5.13 candidate genes]
