# Supplementary material for: Genomic Trajectories to Desiccation Resistance: Convergence and Divergence Among Replicate Selected Drosophila Lines
Source: Oxford University Press journal article supplement (doi:10.1534/genetics.116.187104), 2016-12-23
Supplement: files4.xlsx [file files4.xlsx]

## Sheet: README
	This document collates the results of gene enrichment tests performed with Gowinda v 1.12
	testing the sets of SNPs identified in the selected and control line replicates.
	The list of 'significant SNPs' was adjusted for all desiccation replicates (D1-D5) to exclude SNPs within 1000 bp upstream or downstream of any gene with a control-replicate hit
	These SNPs were retained in the 'all SNP' list for each sample however (used as background for the test).
	Three 'category lists' were used: GO categories from FuncAssociate,
			Gene expression data per body part from Murali et al. 2014
			Gene expression data per developmental stage from Murali et al. 2014
	For the gene expression data, genes were assigned to a category if they were expressed at >= x % of their maximum expression level
	in that category.
	We tried three threshold levels for expression (as a % of max expression): 50%, 75% and 90%
	Results for each are reported in a separate worksheet
	worksheet name	contents
	Devstage_50pc	uncorrected and FDR-corrected P-values for test of significant enrichment of development stage genes (determined as genes expressed at >=50% of max expression) in the 'significant SNP' list versus all SNPs, in each sample (5 control replicates C1-C5, 5 desiccation replicates D1-D5)
	Devstage_75pc	uncorrected and FDR-corrected P-values for test of significant enrichment of development stage genes (determined as genes expressed at >=75% of max expression) in the 'significant SNP' list versus all SNPs, in each sample (5 control replicates C1-C5, 5 desiccation replicates D1-D5)
	Devstage_90pc	uncorrected and FDR-corrected P-values for test of significant enrichment of development stage genes (determined as genes expressed at >=90% of max expression) in the 'significant SNP' list versus all SNPs, in each sample (5 control replicates C1-C5, 5 desiccation replicates D1-D5)
	Bodypart_50pc	uncorrected and FDR-corrected P-values for test of significant enrichment of body part genes (determined as genes expressed at >=50% of max expression) in the 'significant SNP' list versus all SNPs, in each sample (5 control replicates C1-C5, 5 desiccation replicates D1-D5)
	Bodypart_75pc	uncorrected and FDR-corrected P-values for test of significant enrichment of body part genes (determined as genes expressed at >=75% of max expression) in the 'significant SNP' list versus all SNPs, in each sample (5 control replicates C1-C5, 5 desiccation replicates D1-D5)
	Bodypart_90pc	uncorrected and FDR-corrected P-values for test of significant enrichment of body part genes (determined as genes expressed at >=90% of max expression) in the 'significant SNP' list versus all SNPs, in each sample (5 control replicates C1-C5, 5 desiccation replicates D1-D5)
	GO_categories_summary	uncorrected and FDR-corrected P-values for test of significant enrichment of GO categories in the 'significant SNP' list versus all SNPs, in each sample (5 control replicates C1-C5, 5 desiccation replicates D1-D5)
	C1 GO enrichment	full Gowinda output for GO enrichment test on control replicate C1
	C2 GO enrichment	full Gowinda output for GO enrichment test on control replicate C2
	C3 GO enrichment	full Gowinda output for GO enrichment test on control replicate C3
	C4 GO enrichment	full Gowinda output for GO enrichment test on control replicate C4
	C5 GO enrichment	full Gowinda output for GO enrichment test on control replicate C5
	D1 GO enrichment	full Gowinda output for GO enrichment test on desiccation replicate D1
	D2 GO enrichment	full Gowinda output for GO enrichment test on desiccation replicate D2
	D3 GO enrichment	full Gowinda output for GO enrichment test on desiccation replicate D3
	D4 GO enrichment	full Gowinda output for GO enrichment test on desiccation replicate D4
	D5 GO enrichment	full Gowinda output for GO enrichment test on desiccation replicate D5
	eQTL and veQTL GO enrichment	significantly enriched GO categories detected using FlyMine (Benjamini-Hochberg corrected P < 0.05) in genes detected by Huang et al. (2015) PNAS as under the expression control of eQTLs in the candidate SNP list for each replicate
		nb the candidate SNP lists for desiccation-selected lines were analysed *without* removal of putative lab-adaptation SNPs in this test
	Lab-adaptation genes GO enrichment	significantly enriched GO categories detected using FlyMine (Benjamini-Hochberg corrected P < 0.05) in full set of putative lab-adaptation genes

## Sheet: Devstage_90pc
	order	C1_FDR_pval	C2_FDR_pval	C3_FDR_pval	C4_FDR_pval	C5_FDR_pval	D1_FDR_pval	D2_FDR_pval	D3_FDR_pval	D4_FDR_pval	D5_FDR_pval	C1_Uncorrected_pval	C2_Uncorrected_pval	C3_Uncorrected_pval	C4_Uncorrected_pval	C5_Uncorrected_pval	D1_Uncorrected_pval	D2_Uncorrected_pval	D3_Uncorrected_pval	D4_Uncorrected_pval	D5_Uncorrected_pval
EMBRYOS_0_2_HR	1	0.926096	0.905696	0.967521	0.847533	0.6528	0.03002	0.23594	0.00973	0.846945	0.00026	0.34599	0.76944	0.31963	0.13982	0.10661	0.00251	0.03123	0.00038	0.36108	1e-05
EMBRYOS_2_4_HR	2	0.926096	0.862169	0.967521	0.847533	0.6528	0.00737	0.266871	0.157355	0.122408	0.382944	0.59099	0.20219	0.418	0.16277	0.14659	0.00031	0.10051	0.03547	0.03667	0.08361
EMBRYOS_4_6_HR	3	0.926096	0.788255	0.14656	0.977962	0.6528	0.106795	0.169765	0.136985	0.0827717	0.99805	0.18147	0.07898	0.0073	0.55123	0.17302	0.03343	0.01505	0.02107	0.01881	0.89318
EMBRYOS_6_8_HR	4	0.926096	0.905696	0.967521	0.977962	0.803244	1	1	1	0.842805	0.99805	0.24338	0.72534	0.93236	0.68296	0.33592	0.93478	0.97012	0.64692	0.29814	0.92409
EMBRYOS_8_10_HR	5	0.79914	0.905696	0.967521	0.847533	0.803244	1	1	0.720503	1	0.99805	0.03372	0.79436	0.95741	0.12038	0.53001	0.931	0.87173	0.40743	0.78898	0.92806
EMBRYOS_10_12_HR	6	0.926096	0.905696	0.967521	0.977962	0.952466	1	0.922884	0.048235	1	0.99805	0.17907	0.6082	0.94567	0.82041	0.82727	0.8018	0.45572	0.00374	0.86356	0.70735
EMBRYOS_12_14_HR	7	0.926096	0.905696	0.967521	0.977962	0.952466	1	1	1	1	0.99805	0.37321	0.95723	0.96865	0.58665	0.94239	0.99682	0.85771	0.91261	0.65504	0.99943
EMBRYOS_14_16_HR	8	0.926096	0.905696	0.967521	1	0.826041	1	1	1	1	0.99805	0.86228	0.9563	0.68928	0.98014	0.64761	1	0.99347	0.99999	1	0.99385
EMBRYOS_16_18_HR	9	0.926096	0.905696	0.967521	0.977962	0.803244	1	1	1	1	0.972037	0.46776	0.90275	0.75056	0.73479	0.51481	0.9997	0.71452	0.99516	0.99783	0.49602
EMBRYOS_18_20_HR	10	0.998413	0.905696	0.967521	0.977962	0.952466	1	1	1	1	0.99805	0.99315	0.67533	0.95664	0.78781	0.98776	1	0.99949	1	1	0.86358
EMBRYOS_20_22_HR	11	0.926096	0.905696	0.967521	1	0.952466	1	1	1	1	0.99805	0.84007	0.87787	0.66064	0.88772	0.97202	0.98981	0.96957	0.91673	0.99994	0.99952
EMBRYOS_22_24_HR	12	0.926096	0.905696	0.967521	0.855888	0.952466	1	1	0.716191	1	0.99805	0.4528	0.47791	0.70864	0.19813	0.82951	0.8823	0.85857	0.37876	0.9959	0.9346
L1_LARVAE	13	0.926096	0.905696	0.967521	0.977962	0.952466	1	1	1	1	0.99805	0.80147	0.85147	0.97412	0.6891	0.99475	0.99791	0.7527	0.75237	0.97943	0.84771
L2_LARVAE	14	0.926096	0.862169	0.27789	0.977962	0.803244	0.0894929	0.266871	0.653606	0.018285	0.382944	0.468	0.23823	0.03013	0.69773	0.5169	0.01948	0.07364	0.31993	0.00144	0.11254
L3_LARVAE_12_HR_POST_MOLT	15	0.926096	0.905696	0.967521	0.977962	0.952466	0.662258	0.82738	0.347364	1	0.99805	0.62092	0.65264	0.49479	0.66103	0.79077	0.29176	0.34118	0.11186	0.57305	0.89501
L3_LARVAE_DARK_BLUE_GUT_PS_1_2	16	0.926096	0.905696	0.27789	NA	0.6528	0.11778	0.266871	0.473309	0.078042	0.746335	0.77792	0.59971	0.03824	NA	0.1793	0.04205	0.08576	0.18	0.0148	0.27966
L3LARVAE_LIGHT_BLUE_GUT_PS_3_6	17	0.926096	0.905696	0.967521	NA	NA	1	1	1	1	0.382944	0.67144	0.48411	0.56987	NA	NA	0.50595	0.62643	0.95241	0.54589	0.12528
L3_LARVAE_CLEAR_GUT_PS_7_9	18	0.926096	0.905696	0.967521	0.880098	0.803244	0.0894929	0.266871	0.473309	0.0224667	0.382944	0.74176	0.68622	0.4002	0.24751	0.45337	0.01809	0.06649	0.18717	0.00263	0.06532
WHITE_PRE_PUPAE	19	0.99363	0.788255	0.967521	0.977962	0.40947	0.357208	0.169765	1	0.846945	0.972037	0.96453	0.06197	0.3668	0.30963	0.02219	0.13411	0.01257	0.68403	0.33963	0.4565
WPP_PLUS_12_HR	20	0.926096	0.850283	0.967521	NA	0.803244	1	0.82738	0.821016	1	0.99805	0.17047	0.14826	0.83022	NA	0.5389	0.86972	0.35099	0.48725	0.51919	0.80071
WPP_PLUS_24_HR	21	0.926096	0.905696	0.967521	NA	0.803244	1	1	1	1	0.99805	0.58335	0.55363	0.84036	NA	0.33438	0.91954	0.79102	0.99986	0.98744	0.9752
PUPAE_WPP_PLUS_2D	22	0.926096	0.905696	0.967521	0.847533	0.952466	1	1	1	1	0.99805	0.69675	0.94163	0.96647	0.15842	0.88857	0.9982	0.97272	0.99966	0.99007	0.7633
PUPAE_WPP_PLUS_3D	23	0.926096	0.905696	0.967521	0.977962	0.952466	1	0.266871	1	1	0.99805	0.4318	0.63677	0.64918	0.39522	0.99115	0.99225	0.04528	0.98675	0.9544	0.96588
PUPAE_WPP_PLUS_4D	24	0.99363	0.905696	0.829045	1	0.952466	1	1	1	1	0.99805	0.95135	0.88534	0.21199	0.96008	0.94341	0.79106	0.65382	0.99937	0.78976	0.9852
ADULT_FEMALE_ECLOSION_PLUS_1D	25	NA	0.82312	NA	NA	0.803244	1	NA	0.653606	0.628667	0.382944	NA	0.10627	NA	NA	0.32479	0.57365	NA	0.32375	0.20305	0.08549
ADULT_FEMALE_ECLOSION_PLUS_5D	26	0.926096	0.862169	0.829045	0.977962	0.803244	0.585785	0.266871	0.157355	1	0.972037	0.50838	0.26546	0.20299	0.36627	0.55252	0.24052	0.08225	0.03057	0.78388	0.45447
ADULT_FEMALE_ECLOSION_PLUS_30D	27	0.926096	0.905696	0.967521	0.977962	0.803244	1	0.82738	0.347364	1	0.382944	0.86549	0.7039	0.55504	0.70185	0.51394	0.709	0.37094	0.11219	0.55124	0.13221
ADULT_MALE_ECLOSION_PLUS_1D	28	0.926096	0.905696	0.967521	1	0.803244	0.0894929	1	0.11709	0.0890771	0.382944	0.72476	0.61487	0.74153	0.87388	0.57433	0.02571	0.83814	0.01349	0.02374	0.06125
ADULT_MALE_ECLOSION_PLUS_5D	29	0.926096	0.905696	0.967521	0.977962	0.6528	0.0894929	1	0.211321	0.00518	0.972037	0.63152	0.53207	0.43673	0.52768	0.13521	0.02214	0.77767	0.05462	0.00022	0.41757
ADULT_MALE_ECLOSION_PLUS_30D	30	0.926096	0.905696	0.829045	0.977962	0.803244	0.0894929	1	0.590973	0.046785	0.382944	0.24667	0.68987	0.16341	0.70272	0.26873	0.01555	0.74744	0.25002	0.00732	0.13366

## Sheet: Bodypart_90pc
	C1_FDR_pval	C2_FDR_pval	C3_FDR_pval	C4_FDR_pval	C5_FDR_pval	D1_FDR_pval	D2_FDR_pval	D3_FDR_pval	D4_FDR_pval	D5_FDR_pval	C1_Uncorrected_pval	C2_Uncorrected_pval	C3_Uncorrected_pval	C4_Uncorrected_pval	C5_Uncorrected_pval	D1_Uncorrected_pval	D2_Uncorrected_pval	D3_Uncorrected_pval	D4_Uncorrected_pval	D5_Uncorrected_pval
ADULT_CARCASS	NA	0.932327	0.96015	NA	0.919362	0.615985	0.543052	0.884394	0.636802	0.49148	NA	0.83429	0.61175	NA	0.68672	0.28539	0.13728	0.51902	0.26564	0.07808
ADULT_FATBODY	1	0.668695	0.968987	0.901497	0.919362	1	0.74118	0.938546	0.606535	0.988189	0.97787	0.08146	0.96608	0.3915	0.84858	0.64737	0.36911	0.64759	0.21027	0.62337
ADULT_SALIVARY_GLAND	1	0.932327	0.904842	1	0.919362	0.615985	0.74118	0.627675	0.781547	0.988189	0.866	0.93169	0.46901	0.93693	0.50471	0.29426	0.53353	0.23069	0.50167	0.71686
BRAIN	1	0.934073	0.968987	1	0.919362	1	0.988968	1	1	0.999965	0.89635	0.97308	0.98681	0.99537	0.69053	1	0.99302	1	1	0.99999
CROP	1	0.847488	0.904842	0.901497	0.919362	1	0.937845	1	1	0.963466	0.75179	0.71494	0.47111	0.38903	0.82664	0.88884	0.80998	0.78741	0.9521	0.33046
EYE	0.989779	0.932327	0.968987	0.901497	0.919362	1	0.543052	0.884394	0.862266	0.529704	0.68865	0.94305	0.75819	0.61308	0.55909	0.99222	0.16939	0.50769	0.62076	0.13125
HEART	0.701206	0.8121	0.96015	NA	0.919362	1	0.674609	0.938546	0.453257	0.988189	0.29442	0.14909	0.63845	NA	0.85347	0.76322	0.24276	0.63396	0.13078	0.65571
HINDGUT	0.701206	0.847488	0.905655	0.901497	NA	1	0.74118	0.867713	1	0.999965	0.19661	0.69235	0.51813	0.30405	NA	0.95143	0.48231	0.39951	0.88266	0.96892
LARVAL_CARCASS	0.726984	0.847488	0.429578	0.901497	0.968097	1	0.937845	1	1	0.999965	0.37477	0.7433	0.14968	0.54121	0.92149	0.98018	0.88405	0.99606	0.99439	0.97548
LARVAL_CNS	0.701206	0.847488	0.968987	0.932778	0.989833	1	0.543052	1	0.928572	0.988189	0.13436	0.75722	0.68061	0.74543	0.9756	0.79074	0.13411	0.95892	0.70831	0.75949
LARVAL_FATBODY	1	0.668695	0.968987	0.94234	0.901495	0.586174	0.543052	0.12193	0.13584	0.988189	0.86003	0.08076	0.79873	0.82389	0.22502	0.22108	0.17386	0.02416	0.02636	0.53264
LARVAL_HINDGUT	1	0.847488	0.278612	NA	NA	0.951744	0.74118	0.595856	0.98668	0.988189	0.97099	0.75691	0.08484	NA	NA	0.56845	0.48478	0.19327	0.79023	0.76445
LARVAL_MIDGUT	0.771827	0.847488	0.276477	0.94234	0.919362	0.138857	0.930556	0.938546	0.606535	0.718275	0.43927	0.65495	0.01847	0.78428	0.37572	0.02646	0.76973	0.67944	0.2244	0.22069
LARVAL_SALIVARY_GLAND	0.701206	0.8121	0.641884	NA	0.901495	0.908526	0.74118	0.00576667	0.850659	0.988189	0.12646	0.46954	0.2537	NA	0.07145	0.5047	0.44971	0.00092	0.57569	0.59145
LARVAL_TRACHEA	0.726984	0.932327	0.968987	0.932778	0.919362	1	0.937845	1	0.781547	0.999965	0.39398	0.91802	0.87552	0.7287	0.69282	0.92032	0.85772	0.93867	0.4508	0.99535
LARVAL_TUBULE	0.983695	0.8121	0.968987	0.901497	0.919362	0.11493	0.04959	0.433343	0.781547	0.339505	0.61423	0.39295	0.95172	0.56735	0.74943	0.01205	0.00285	0.12343	0.45917	0.03677
MALE_ACCESSORY_GLAND	0.701206	0.8121	0.968987	0.35428	0.919362	0.193006	0.74118	0.00017	0.781547	0.529704	0.2851	0.39658	0.94182	0.04983	0.49145	0.0485	0.52204	1e-05	0.41365	0.13453
MIDGUT	0.701206	0.8121	0.276477	0.38787	0.919362	0.689425	0.946776	1	0.43392	0.988189	0.08268	0.26435	0.04793	0.07979	0.3826	0.35683	0.9277	0.87312	0.1051	0.42579
OVARY	0.701206	0.8121	0.968987	0.35428	0.901495	0.00183	0.543052	0.00078	0.10741	0.00461	0.17461	0.4857	0.85388	0.03322	0.14403	0.0001	0.11819	8e-05	0.01614	0.00027
SPERMATHECA_VIRGIN	NA	0.8121	0.904842	0.901497	0.919362	0.455723	0.930556	0.203434	0.10741	0.999965	NA	0.35269	0.44884	0.40513	0.57666	0.15825	0.76142	0.04886	0.01536	0.99259
TESTIS	0.701206	0.8121	0.278612	0.932778	0.901495	0.455723	0.74118	0.884394	0.00075	0.988189	0.28166	0.19962	0.0859	0.70298	0.19793	0.1357	0.31994	0.50418	4e-05	0.50674
THORACICOABDOMINAL_GANGLION	1	0.847488	0.968987	0.901497	0.919362	1	0.856494	1	1	0.999965	0.86557	0.61708	0.99024	0.56132	0.81132	0.81622	0.64118	0.8276	0.97535	0.9067
TUBULE	0.983695	0.8121	0.276477	0.496547	0.919362	0.138857	0.74118	0.674881	0.781547	0.988189	0.63046	0.41198	0.05342	0.13201	0.51251	0.028	0.44275	0.28489	0.45778	0.62294

## Sheet: Devstage_75pc
	order	C1_FDR_pval	C2_FDR_pval	C3_FDR_pval	C4_FDR_pval	C5_FDR_pval	D1_FDR_pval	D2_FDR_pval	D3_FDR_pval	D4_FDR_pval	D5_FDR_pval	C1_Uncorrected_pval	C2_Uncorrected_pval	C3_Uncorrected_pval	C4_Uncorrected_pval	C5_Uncorrected_pval	D1_Uncorrected_pval	D2_Uncorrected_pval	D3_Uncorrected_pval	D4_Uncorrected_pval	D5_Uncorrected_pval
EMBRYOS_0_2_HR	1	0.711358	0.951118	0.50291	0.931522	0.486698	0.0129733	0.01979	0.0003925	0.806378	0.00025	0.16524	0.76128	0.14772	0.22531	0.21776	0.0015	0.00087	7e-05	0.40748	1e-05
EMBRYOS_2_4_HR	2	0.711358	0.951118	0.202277	0.931522	0.486698	0.006835	0.198015	0.000343333	0.17228	0.133844	0.18331	0.35708	0.02826	0.61041	0.15092	0.00053	0.01622	4e-05	0.06861	0.03492
EMBRYOS_4_6_HR	3	0.711358	0.951118	0.316542	0.947696	0.486698	0.039906	0.274097	0.00027	0.00681667	0.999904	0.08514	0.18233	0.06925	0.73697	0.1439	0.00684	0.0442	2e-05	0.00155	0.95097
EMBRYOS_6_8_HR	4	0.964556	0.951118	0.977705	0.931522	0.835151	1	0.999843	0.0468957	0.972359	0.999904	0.54439	0.93302	0.98609	0.45952	0.42792	0.87352	0.74137	0.01213	0.5611	0.90488
EMBRYOS_8_10_HR	5	0.711358	0.951118	0.880834	0.931522	0.486698	1	0.807029	0.242641	1	0.999904	0.11592	0.3726	0.6468	0.4216	0.04529	0.99726	0.43997	0.11293	0.65877	0.99737
EMBRYOS_10_12_HR	6	0.711358	0.951118	0.977705	1	0.982997	1	0.797549	0.00023	0.0642814	0.999904	0.17645	0.89393	0.98554	0.87466	0.889	0.78543	0.34846	1e-05	0.01628	0.92377
EMBRYOS_12_14_HR	7	0.711358	0.951118	0.977705	0.931522	0.982997	1	0.999843	1	1	0.999904	0.21975	0.96752	0.97845	0.56846	0.85964	0.99996	0.99862	0.84977	0.9219	0.9999
EMBRYOS_14_16_HR	8	0.964556	0.951118	0.977705	0.931522	0.982997	1	0.999843	1	1	0.999904	0.92909	0.91363	0.95738	0.64092	0.96802	1	0.99991	1	1	0.99994
EMBRYOS_16_18_HR	9	0.964556	0.951118	0.927975	0.931522	0.982997	1	0.999843	1	1	0.999904	0.84617	0.86582	0.75382	0.65194	0.93315	1	0.99455	1	1	0.99788
EMBRYOS_18_20_HR	10	0.986901	0.951118	0.977705	0.993233	0.982997	1	0.999843	1	1	0.999904	0.99151	0.82763	0.90991	0.80383	0.99791	1	0.99954	1	1	0.99829
EMBRYOS_20_22_HR	11	0.964556	0.951118	0.927975	0.931522	0.982997	1	0.999843	1	1	0.999904	0.91517	0.82649	0.75187	0.68807	0.99945	0.99995	0.99713	0.99532	0.99999	0.98009
EMBRYOS_22_24_HR	12	0.964556	0.951118	0.863142	0.931522	0.982997	1	0.999843	1	1	0.999904	0.71869	0.80578	0.59365	0.66538	0.99181	0.99845	0.99083	0.7577	0.9976	0.99254
L1_LARVAE	13	0.964556	0.951118	0.977705	0.993233	0.982997	1	0.999843	1	1	0.999904	0.92678	0.96011	0.93065	0.84977	0.99851	0.99331	0.98157	0.88819	0.99572	0.92018
L2_LARVAE	14	0.964556	0.951118	0.06793	0.931522	0.982997	0.188119	0.460498	0.192599	0.000923333	0.378282	0.55127	0.3737	0.00301	0.68996	0.6714	0.07059	0.10725	0.07217	9e-05	0.14056
L3_LARVAE_12_HR_POST_MOLT	15	0.964556	0.951118	0.640253	0.931522	0.486698	0.270963	0.558992	0.192599	0.17228	0.999904	0.72754	0.41775	0.23942	0.61708	0.18063	0.11841	0.17248	0.08245	0.06452	0.65073
L3_LARVAE_DARK_BLUE_GUT_PS_1_2	16	0.964556	0.951118	0.202277	NA	0.486698	0.188119	0.558992	0.523653	0.253582	0.253487	0.8246	0.2228	0.01827	NA	0.19126	0.07709	0.19067	0.29423	0.10931	0.07461
L3LARVAE_LIGHT_BLUE_GUT_PS_3_6	17	0.964556	0.951118	0.640253	NA	0.982997	0.602897	0.807029	0.845126	0.147883	0.0323875	0.64071	0.60302	0.30712	NA	0.88566	0.2781	0.44134	0.52103	0.04286	0.00436
L3_LARVAE_CLEAR_GUT_PS_7_9	18	0.964556	0.951118	0.640253	0.931522	0.486698	0.0549583	0.24974	0.523653	0.000923333	0.0323875	0.86586	0.54433	0.30109	0.43763	0.21187	0.01255	0.0296	0.29081	0.00011	0.00395
WHITE_PRE_PUPAE	19	0.986901	0.816975	0.65499	0.947696	0.486698	0.104617	0.300572	0.666492	0.164326	0.679352	0.97267	0.07067	0.3839	0.71744	0.08738	0.03295	0.05925	0.39117	0.05375	0.30724
WPP_PLUS_12_HR	20	0.964556	0.33683	0.82304	1	0.874454	1	0.786601	1	1	0.999904	0.5255	0.01472	0.5492	0.93969	0.47099	0.66204	0.32286	0.95843	0.82925	0.83206
WPP_PLUS_24_HR	21	0.906394	0.951118	0.65499	1	0.486698	1	0.999843	1	0.972359	0.999904	0.38867	0.52803	0.40623	0.9883	0.224	0.69356	0.98012	0.99421	0.56769	0.91107
PUPAE_WPP_PLUS_2D	22	0.964556	0.951118	0.977705	0.931522	0.982997	1	0.999843	1	1	0.999904	0.76629	0.91155	0.87099	0.2657	0.76705	0.99665	0.99841	1	0.86708	0.71564
PUPAE_WPP_PLUS_3D	23	0.964556	0.951118	0.892676	0.931522	0.982997	1	0.713813	1	1	0.999904	0.51142	0.56831	0.67872	0.17737	0.96056	0.99711	0.26099	0.99992	0.91523	0.96078
PUPAE_WPP_PLUS_4D	24	0.964556	0.951118	0.316542	1	0.982997	1	0.999843	1	1	0.999904	0.89319	0.86248	0.06259	0.95601	0.91777	0.95925	0.90452	0.99996	0.98268	0.98581
ADULT_FEMALE_ECLOSION_PLUS_1D	25	0.964556	0.951118	0.316542	NA	0.919091	0.603831	0.999843	0.117646	0.777808	0.437317	0.70945	0.47641	0.07939	NA	0.54557	0.30168	0.92396	0.03591	0.354	0.18136
ADULT_FEMALE_ECLOSION_PLUS_5D	26	0.711358	0.951118	0.65499	0.105595	0.565403	0.104617	0.500419	0.008458	0.806378	0.133844	0.1104	0.76092	0.38854	0.0105	0.27259	0.03484	0.13456	0.00156	0.41857	0.03643
ADULT_FEMALE_ECLOSION_PLUS_30D	27	0.711358	0.951118	0.65499	0.105595	0.921441	0.682217	0.807029	0.0422833	1	0.037632	0.25584	0.94222	0.37829	0.0098	0.60264	0.36247	0.46223	0.0093	0.73045	0.00745
ADULT_MALE_ECLOSION_PLUS_1D	28	0.964556	0.951118	0.640253	0.931522	0.486698	0.0590514	0.999843	0.117646	0.00234	0.378282	0.74416	0.77201	0.26384	0.38017	0.14566	0.01521	0.74541	0.03854	0.00037	0.13518
ADULT_MALE_ECLOSION_PLUS_5D	29	0.711358	0.951118	0.640253	0.931522	0.486698	0.039906	0.999843	0.419306	0.00026	0.679352	0.24408	0.81403	0.19815	0.67439	0.15772	0.00786	0.81662	0.2063	1e-05	0.31684
ADULT_MALE_ECLOSION_PLUS_30D	30	0.906394	0.951118	0.65499	0.931522	0.919091	0.006835	0.797549	0.192599	0.003854	0.0323875	0.35691	0.85834	0.42909	0.53869	0.55517	0.00056	0.38174	0.08064	0.00072	0.00531

## Sheet: Bodypart_75pc
	C1_FDR_pval	C2_FDR_pval	C3_FDR_pval	C4_FDR_pval	C5_FDR_pval	D1_FDR_pval	D2_FDR_pval	D3_FDR_pval	D4_FDR_pval	D5_FDR_pval	C1_Uncorrected_pval	C2_Uncorrected_pval	C3_Uncorrected_pval	C4_Uncorrected_pval	C5_Uncorrected_pval	D1_Uncorrected_pval	D2_Uncorrected_pval	D3_Uncorrected_pval	D4_Uncorrected_pval	D5_Uncorrected_pval
ADULT_CARCASS	0.973707	0.961028	0.885228	0.873286	0.679082	0.976165	0.479512	0.700661	0.496221	0.413165	0.90358	0.9534	0.46688	0.75541	0.3202	0.59899	0.22171	0.43076	0.25187	0.08592
ADULT_FATBODY	0.973707	0.832102	0.962205	0.815185	0.700179	0.976165	0.462681	0.961707	0.122536	0.923675	0.95417	0.22401	0.81568	0.19118	0.3941	0.71003	0.16718	0.80839	0.02956	0.53941
ADULT_SALIVARY_GLAND	0.973707	0.832102	0.885228	0.873286	0.843415	0.230614	0.479512	0.348275	1	0.923675	0.88826	0.5284	0.53824	0.7145	0.57935	0.09073	0.26855	0.09841	0.7491	0.4964
BRAIN	0.973707	0.969905	0.985528	0.929208	0.84626	1	0.995271	1	1	0.999967	0.885	0.98688	0.9689	0.99138	0.86638	1	0.99667	1	1	0.99998
CROP	0.973707	0.832102	0.934743	0.873286	0.84626	0.976165	0.882402	0.700661	1	0.903823	0.82109	0.7264	0.71284	0.42441	0.85179	0.55757	0.78148	0.47292	0.89676	0.30609
EYE	0.973707	0.925344	0.939135	0.873286	0.721732	1	0.295258	0.700661	1	0.28121	0.92936	0.90076	0.7651	0.81434	0.42105	0.9532	0.05759	0.45102	0.94791	0.02966
HEART	0.70321	0.606205	0.885228	0.873286	0.843415	1	0.102303	0.42279	0.496221	0.943945	0.33282	0.06966	0.56833	0.87872	0.5482	0.93432	0.01515	0.15729	0.25312	0.62076
HINDGUT	0.690023	0.832102	0.661746	0.873286	0.859411	0.976165	0.882402	0.59782	1	0.943945	0.22572	0.53848	0.27602	0.53374	0.92093	0.68902	0.72423	0.31721	0.63914	0.77002
LARVAL_CARCASS	0.70321	0.832102	0.35933	0.873286	0.84626	1	0.882402	1	1	0.999967	0.3831	0.79137	0.08688	0.72165	0.86799	0.9838	0.79961	0.93517	0.98656	0.9093
LARVAL_CNS	0.690023	0.832102	0.962205	0.873286	0.84626	0.976165	0.529944	0.826151	1	0.923675	0.24534	0.78277	0.85283	0.42218	0.68351	0.74602	0.35147	0.5929	0.93409	0.38617
LARVAL_FATBODY	0.973707	0.606205	0.885228	0.873286	0.663832	0.209256	0.479512	0.01926	0.012995	0.943945	0.89443	0.07023	0.52265	0.9067	0.23373	0.05284	0.20125	0.00383	0.00128	0.74053
LARVAL_HINDGUT	0.977465	0.832102	0.474479	0.873286	0.84626	0.976165	0.853676	0.948602	1	0.999967	0.98744	0.3463	0.18015	0.89549	0.82456	0.71222	0.62855	0.7552	0.78451	0.94488
LARVAL_MIDGUT	0.70321	0.832102	0.250705	0.873286	0.247877	0.05039	0.516569	0.59782	0.247608	0.923675	0.31032	0.728	0.03075	0.40139	0.04637	0.00512	0.32705	0.3285	0.07097	0.41361
LARVAL_SALIVARY_GLAND	0.690023	0.832102	0.474479	0.873286	0.50234	0.803555	0.462681	6e-05	0.711414	0.923675	0.17047	0.68171	0.15747	0.82478	0.15337	0.40574	0.14564	1e-05	0.42194	0.53196
LARVAL_TRACHEA	0.690023	0.832102	0.985528	0.873286	0.84626	1	0.882402	1	1	0.999967	0.20888	0.49349	0.93614	0.77433	0.81837	0.82431	0.73219	0.95803	0.72145	0.93105
LARVAL_TUBULE	0.70321	0.832102	0.934743	0.873286	0.431003	0.11473	0.00176	0.577166	0.423562	0.540533	0.39102	0.41086	0.70478	0.54331	0.10194	0.02418	0.00011	0.26528	0.17681	0.15613
MALE_ACCESSORY_GLAND	0.690023	0.832102	0.985528	0.496315	0.679082	0.219427	0.462681	6e-05	0.605481	0.413165	0.25323	0.56057	0.91246	0.06479	0.34851	0.06504	0.14969	1e-05	0.33393	0.07564
MIDGUT	0.690023	0.832102	0.250705	0.815185	0.247877	0.496598	0.884818	0.948602	0.423562	0.540533	0.08704	0.19789	0.02137	0.17701	0.03638	0.21258	0.86667	0.74948	0.1727	0.1373
OVARY	0.690023	0.832102	0.895988	0.44066	0.247877	0.00021	0.102303	6e-05	0.0917975	0.00191	0.25472	0.49126	0.62841	0.02993	0.01757	1e-05	0.01656	1e-05	0.01761	0.00011
SPERMATHECA_VIRGIN	0.745249	0.832102	0.885228	0.873286	0.84626	0.610729	0.853676	0.27069	0.0884367	0.943945	0.52269	0.61299	0.56212	0.70757	0.86087	0.29062	0.61101	0.06389	0.01295	0.67291
TESTIS	0.723138	0.832102	0.4187	0.873286	0.679082	0.230614	0.479512	0.577166	0.00017	0.923675	0.4587	0.33642	0.12359	0.64121	0.30201	0.09074	0.27414	0.25731	1e-05	0.55103
THORACICOABDOMINAL_GANGLION	0.973707	0.832102	0.995483	0.873286	0.84626	1	0.884818	1	1	0.999967	0.95198	0.62697	0.99906	0.89751	0.68323	0.93426	0.84509	0.98114	0.98722	0.97052
TUBULE	0.723138	0.832102	0.35933	0.873286	0.84626	0.11473	0.479512	0.383181	0.423562	0.943945	0.47655	0.36545	0.07195	0.28674	0.72832	0.0184	0.27582	0.12489	0.16267	0.71038

## Sheet: Devstage_50pc
	order	C1_FDR_pval	C2_FDR_pval	C3_FDR_pval	C4_FDR_pval	C5_FDR_pval	D1_FDR_pval	D2_FDR_pval	D3_FDR_pval	D4_FDR_pval	D5_FDR_pval	C1_Uncorrected_pval	C2_Uncorrected_pval	C3_Uncorrected_pval	C4_Uncorrected_pval	C5_Uncorrected_pval	D1_Uncorrected_pval	D2_Uncorrected_pval	D3_Uncorrected_pval	D4_Uncorrected_pval	D5_Uncorrected_pval
EMBRYOS_0_2_HR	1	0.409444	0.795933	0.523012	0.86459	0.21687	0.00568	0.00144	3.25e-05	0.056932	0.000615	0.12499	0.35337	0.20581	0.05848	0.08017	0.00043	6e-05	1e-05	0.02411	3e-05
EMBRYOS_2_4_HR	2	0.321658	0.490514	0.317385	0.912348	0.180935	0.0205612	0.376354	3.25e-05	0.015836	0.155421	0.07601	0.1506	0.07871	0.22579	0.03114	0.00589	0.12472	1e-05	0.00568	0.04585
EMBRYOS_4_6_HR	3	0.231322	0.23916	0.317385	0.912348	0.180935	0.006872	0.0555525	3.25e-05	0.002314	0.99996	0.02059	0.02924	0.1016	0.49504	0.03272	0.00113	0.00859	1e-05	0.00042	0.82366
EMBRYOS_6_8_HR	4	0.60324	0.890657	0.683556	0.912348	0.802604	0.560519	0.413213	3.25e-05	0.056932	0.99996	0.24523	0.55453	0.37392	0.41436	0.50109	0.30604	0.15111	1e-05	0.02718	0.9322
EMBRYOS_8_10_HR	5	0.231322	0.490514	0.597773	0.994474	0.180935	0.560519	0.894558	8.1e-05	0.336811	0.99996	0.02887	0.09757	0.29248	0.64131	0.05495	0.31408	0.44122	3e-05	0.20901	0.99193
EMBRYOS_10_12_HR	6	0.995399	0.956323	0.986387	0.912348	0.874458	1	0.527006	3.25e-05	0.056932	0.99996	0.88199	0.84628	0.98116	0.49296	0.60766	0.75763	0.22929	1e-05	0.03012	0.77615
EMBRYOS_12_14_HR	7	0.75332	0.759546	0.986387	0.912348	0.349178	1	0.999904	0.720556	0.632271	0.99996	0.5812	0.29609	0.82881	0.49308	0.13501	0.99709	0.947	0.46577	0.45108	0.9932
EMBRYOS_14_16_HR	8	0.744401	0.956323	0.986387	0.912348	0.9998	1	0.999904	1	1	0.99996	0.45198	0.91137	0.97547	0.49074	0.9579	1	0.99957	1	1	0.99993
EMBRYOS_16_18_HR	9	0.995399	0.956323	0.986387	0.994474	0.9998	1	0.999904	1	1	0.99996	0.95414	0.77008	0.97803	0.88022	0.99792	1	0.99993	1	1	0.99996
EMBRYOS_18_20_HR	10	0.995399	0.999253	0.986387	0.99947	0.9998	1	0.999904	1	1	0.99996	0.99669	0.99955	0.96446	0.97919	0.99995	1	0.99943	1	1	0.99997
EMBRYOS_20_22_HR	11	0.995399	0.956323	0.986387	0.994474	0.9998	1	0.999904	1	1	0.99996	0.98998	0.89105	0.93608	0.91891	0.99991	0.99344	0.98198	0.99991	0.99999	0.95718
EMBRYOS_22_24_HR	12	0.995399	0.910547	0.986387	0.994474	0.9998	1	0.999904	1	1	0.99996	0.95225	0.66538	0.87708	0.65414	0.99805	0.99182	0.96931	0.99603	0.9954	0.99137
L1_LARVAE	13	0.995399	0.956323	0.986387	0.994474	0.9998	1	0.999904	0.762957	1	0.99996	0.86198	0.8187	0.87167	0.67837	0.99138	0.99886	0.91638	0.56863	0.97228	0.93255
L2_LARVAE	14	0.744401	0.490514	0.0595033	0.912348	0.731846	0.196523	0.318149	3.25e-05	0.00055	0.277883	0.56004	0.15128	0.0063	0.43773	0.41793	0.08453	0.08212	1e-05	2e-05	0.12
L3_LARVAE_12_HR_POST_MOLT	15	0.744401	0.890657	0.176815	0.994474	0.731846	0.229255	0.376354	8.1e-05	0.000793333	0.393314	0.55288	0.46877	0.02925	0.91814	0.41005	0.1058	0.11719	3e-05	9e-05	0.18238
L3_LARVAE_DARK_BLUE_GUT_PS_1_2	16	0.409444	0.890657	0.05077	NA	0.731846	0.006872	0.535785	0.000609091	0.00709	0.004468	0.12805	0.57364	0.00216	NA	0.35172	0.00127	0.24827	0.00025	0.0018	0.00086
L3LARVAE_LIGHT_BLUE_GUT_PS_3_6	17	0.60324	0.742193	0.317385	0.994474	0.874458	0.111407	0.263137	0.0244792	0.0020025	0.0709457	0.24841	0.2518	0.09967	0.89733	0.59595	0.04051	0.05991	0.01144	0.00029	0.01887
L3_LARVAE_CLEAR_GUT_PS_7_9	18	0.744401	0.15775	0.0595033	0.912348	0.180935	0.389051	0.183346	0.00955083	0.00967875	0.157761	0.51673	0.01296	0.00747	0.30273	0.03985	0.19201	0.03532	0.00415	0.00276	0.05189
WHITE_PRE_PUPAE	19	0.744401	0.13383	0.317385	0.912348	0.14575	0.890059	0.94896	0.259384	0.075175	0.99996	0.55178	0.00576	0.09802	0.24825	0.00644	0.52383	0.56843	0.15249	0.04291	0.59974
WPP_PLUS_12_HR	20	0.744401	0.490514	0.523012	0.994474	0.180935	0.890059	0.94896	0.73939	0.336811	0.99996	0.49348	0.09222	0.23607	0.85237	0.04457	0.54693	0.62936	0.50467	0.19999	0.86279
WPP_PLUS_24_HR	21	0.918297	0.845638	0.523012	0.994474	0.180935	1	0.999904	0.755022	0.960535	0.99996	0.7353	0.40388	0.22679	0.8656	0.06095	0.93165	0.79193	0.53884	0.74451	0.99767
PUPAE_WPP_PLUS_2D	22	0.744401	0.890657	0.986387	0.912348	0.9998	1	0.999904	1	0.851616	0.99996	0.40019	0.5623	0.9895	0.47972	0.82608	0.99814	0.99566	0.99369	0.63589	0.98503
PUPAE_WPP_PLUS_3D	23	0.716159	0.890657	0.986387	0.99947	0.900067	1	0.94896	1	0.581489	0.99996	0.33974	0.55843	0.95181	0.95714	0.67933	0.99393	0.6315	0.99658	0.39639	0.98959
PUPAE_WPP_PLUS_4D	24	0.995399	0.910547	0.683556	0.994474	0.9998	1	0.94896	1	1	0.99996	0.82846	0.67941	0.35705	0.84103	0.86948	0.99815	0.68642	0.99999	0.98254	0.68507
ADULT_FEMALE_ECLOSION_PLUS_1D	25	0.744401	0.967971	0.986387	0.86459	0.9998	0.173968	0.413213	0.156404	0.564567	0.0013675	0.47986	0.94862	0.89013	0.10426	0.90739	0.06889	0.16558	0.0877	0.36812	0.00022
ADULT_FEMALE_ECLOSION_PLUS_5D	26	0.231322	0.490514	0.749374	0.86459	0.180935	0.00213	0.04855	3.25e-05	0.056932	0.000733333	0.0125	0.13301	0.47476	0.10884	0.04852	8e-05	0.00388	1e-05	0.02633	9e-05
ADULT_FEMALE_ECLOSION_PLUS_30D	27	0.231322	0.759546	0.986387	0.86459	0.503283	0.006872	0.05328	3.25e-05	0.056932	0.000615	0.03692	0.31675	0.71492	0.14438	0.22039	0.00122	0.00621	1e-05	0.02945	5e-05
ADULT_MALE_ECLOSION_PLUS_1D	28	0.692478	0.910547	0.749374	0.912348	0.731846	0.0122983	0.918119	0.156404	0.000793333	0.179719	0.30902	0.625	0.44614	0.51739	0.40432	0.0027	0.50284	0.08613	8e-05	0.07156
ADULT_MALE_ECLOSION_PLUS_5D	29	0.60324	0.956323	0.378554	0.994474	0.900067	0.03492	0.94896	0.0504986	0.00319667	0.157761	0.20979	0.74229	0.13387	0.75412	0.666	0.01143	0.67729	0.02505	0.0007	0.05845
ADULT_MALE_ECLOSION_PLUS_30D	30	0.321658	0.956323	0.749374	0.994474	0.731846	0.0205612	0.918119	0.46284	0.0137544	0.0489533	0.07505	0.88503	0.4884	0.82446	0.43936	0.00615	0.51503	0.28715	0.00451	0.01091

## Sheet: Bodypart_50pc
	C1_FDR_pval	C2_FDR_pval	C3_FDR_pval	C4_FDR_pval	C5_FDR_pval	D1_FDR_pval	D2_FDR_pval	D3_FDR_pval	D4_FDR_pval	D5_FDR_pval	C1_Uncorrected_pval	C2_Uncorrected_pval	C3_Uncorrected_pval	C4_Uncorrected_pval	C5_Uncorrected_pval	D1_Uncorrected_pval	D2_Uncorrected_pval	D3_Uncorrected_pval	D4_Uncorrected_pval	D5_Uncorrected_pval
ADULT_CARCASS	0.816167	0.556977	0.795636	0.874339	0.335151	0.641019	0.328667	0.154655	0.115069	0.0489167	0.59822	0.27997	0.69232	0.78577	0.12313	0.55095	0.19025	0.10383	0.05933	0.00733
ADULT_FATBODY	0.925521	0.556977	0.697662	0.862123	0.656364	0.641019	0.071894	0.234132	0.0960343	0.144163	0.94072	0.27425	0.17451	0.44897	0.47882	0.55002	0.0188	0.19047	0.03129	0.04297
ADULT_SALIVARY_GLAND	0.660247	0.876646	0.795636	0.862123	0.335151	0.291479	0.222832	3.8e-05	0.118583	0.173632	0.20099	0.71137	0.61962	0.59603	0.12356	0.15323	0.11664	1e-05	0.07371	0.06748
BRAIN	0.816167	0.986952	0.822972	0.931058	0.971288	1	0.91775	0.9983	0.999977	0.953212	0.70269	0.99125	0.82585	0.95942	0.84888	1	0.9296	0.99848	0.99998	0.95888
CROP	0.816167	0.70785	0.795636	0.862123	0.369237	0.709082	0.335306	0.154655	0.531015	0.523903	0.71974	0.46878	0.69696	0.49217	0.16042	0.63633	0.23371	0.0935	0.48529	0.26498
EYE	0.925521	0.70785	0.795636	0.862123	0.842344	0.900723	0.0768383	0.169861	0.118583	0.144163	0.94289	0.48496	0.69093	0.60139	0.66046	0.83324	0.02387	0.12471	0.07961	0.04264
HEART	0.816167	0.556977	0.795636	0.862123	0.765361	0.5024	0.060245	0.154655	0.030316	0.534644	0.533	0.12077	0.70328	0.38418	0.55886	0.32172	0.01269	0.08958	0.00712	0.47109
HINDGUT	0.816167	0.941488	0.795636	0.862123	0.971288	0.291479	0.335306	0.0746673	0.13572	0.534644	0.44234	0.89197	0.57344	0.35968	0.96799	0.15681	0.23926	0.03784	0.09997	0.36819
LARVAL_CARCASS	0.746117	0.876646	0.795636	0.862123	0.971288	0.598803	0.343071	0.459198	0.531015	0.534644	0.33747	0.78823	0.44237	0.58701	0.94176	0.43265	0.26155	0.43139	0.4953	0.40382
LARVAL_CNS	0.746117	0.876646	0.795636	0.8987	0.335151	0.576121	0.485212	0.177589	0.118583	0.534644	0.33014	0.8075	0.77809	0.85101	0.06729	0.39351	0.40277	0.13774	0.07816	0.4831
LARVAL_FATBODY	0.816167	0.25007	0.795636	0.931058	0.335151	0.12955	0.216878	3.8e-05	0.00293	0.293759	0.69414	0.01484	0.75348	0.95726	0.13172	0.0372	0.09632	1e-05	0.00029	0.1411
LARVAL_HINDGUT	0.816167	0.556977	0.795636	0.874339	0.971288	0.374292	0.723479	0.266166	0.118583	0.534644	0.60621	0.20675	0.61088	0.77996	0.98332	0.22555	0.68542	0.22798	0.08096	0.51679
LARVAL_MIDGUT	0.816167	0.876646	0.630937	0.862123	0.435452	0.07324	0.376846	0.154655	0.33041	0.144163	0.63402	0.75781	0.10659	0.55953	0.26049	0.01408	0.29835	0.10502	0.27089	0.03637
LARVAL_SALIVARY_GLAND	0.436105	0.556977	0.795636	0.862123	0.335151	0.11696	0.207405	3.8e-05	0.114535	0.534644	0.04658	0.11448	0.26389	0.54186	0.10634	0.02829	0.08011	1e-05	0.04848	0.42755
LARVAL_TRACHEA	0.816167	0.776275	0.875987	0.874339	0.971288	0.641019	0.518334	0.00742	0.363243	0.534644	0.67145	0.57218	0.90512	0.76682	0.9645	0.53295	0.45488	0.00212	0.31095	0.48612
LARVAL_TUBULE	0.746117	0.70785	0.795636	0.862123	0.381402	0.00756	0.01346	0.0650589	0.04809	0.144163	0.29481	0.46266	0.36809	0.4954	0.21378	0.00076	0.00145	0.02713	0.01367	0.04912
MALE_ACCESSORY_GLAND	0.637048	0.556977	0.795636	0.862123	0.435452	0.291479	0.335306	3.8e-05	0.111494	0.027885	0.16222	0.20641	0.69889	0.17939	0.27002	0.16284	0.23353	1e-05	0.04179	0.00288
MIDGUT	0.436105	0.70785	0.630937	0.862123	0.335151	0.213833	0.671775	0.416138	0.030316	0.534644	0.04677	0.47212	0.05107	0.34876	0.07376	0.08125	0.6151	0.37373	0.00595	0.33482
OVARY	0.637048	0.811934	0.795636	0.53321	0.335151	0.00019	0.0145767	3.8e-05	0.114535	0.0002	0.15152	0.61974	0.40942	0.03258	0.02715	1e-05	0.0023	1e-05	0.05272	1e-05
SPERMATHECA_VIRGIN	0.833383	0.3848	0.630937	0.862123	0.971288	0.291479	0.116209	0.00758	0.0261833	0.534644	0.76323	0.04279	0.07407	0.64455	0.78375	0.12928	0.04132	0.00248	0.0038	0.51852
TESTIS	0.637048	0.556977	0.795636	0.863741	0.381402	0.187214	0.222832	0.0746673	0.00044	0.534644	0.1118	0.26813	0.31642	0.69368	0.21461	0.06309	0.11165	0.03707	2e-05	0.44953
THORACICOABDOMINAL_GANGLION	0.899236	0.986952	0.795636	0.8987	0.971288	1	0.831801	0.9983	0.999977	0.953212	0.85853	0.99254	0.6565	0.87739	0.92408	0.99972	0.81503	0.96421	0.99641	0.93679
TUBULE	0.816167	0.556977	0.697662	0.862123	0.649255	0.0177267	0.01346	0.0390887	0.221515	0.233931	0.54916	0.18465	0.17966	0.22014	0.42057	0.00261	0.00116	0.01482	0.17213	0.10281

## Sheet: GO_categories_summary
C1_GO_category	Uncorrected_pval	FDR_pval		C2_GO_category	Uncorrected_pval	FDR_pval		C3_GO_category	Uncorrected_pval	FDR_pval		C4_GO_category	Uncorrected_pval	FDR_pval		C5_GO_category	Uncorrected_pval	FDR_pval		D1_GO_category	Uncorrected_pval	FDR_pval		D2_GO_category	Uncorrected_pval	FDR_pval		D3_GO_category	Uncorrected_pval	FDR_pval		D4_GO_category	Uncorrected_pval	FDR_pval		D5_GO_category	Uncorrected_pval	FDR_pval
mitochondrion	1e-05	0.01765		mitochondrion	1e-05	0.0043425		mitochondrial respiratory chain complex I	1e-05	0.00155909		sterol biosynthetic process	0.00077	0.64749		oxidoreductase activity, acting on NAD(P)H, quinone or similar compound as acceptor	1e-05	0.00120143		regulation of histone modification	1e-05	0.01818		methylated histone residue binding	0.00016	0.20852		body morphogenesis	1e-05	0.0017525		ATP hydrolysis coupled proton transport	0.00032	0.25849		Notch receptor processing	0.00077	0.478938
mitochondrial membrane part	6e-05	0.028695		cytoplasmic part	1e-05	0.0043425		mitochondrion	1e-05	0.00155909		cholesterol biosynthetic process	0.00115	0.64749		mitochondrion	1e-05	0.00120143		catalytic activity	3e-05	0.02809		nuclear part	0.0002	0.20852		pole plasm oskar mRNA localization	1e-05	0.0017525		energy coupled proton transmembrane transport, against electrochemical gradient	0.00032	0.25849		regulation of protein secretion	0.00086	0.478938
intracellular membrane-bounded organelle	9e-05	0.028695		mitochondrial membrane part	1e-05	0.0043425		mitochondrial membrane part	1e-05	0.00155909		phosphomevalonate kinase activity	0.00115	0.64749		triplet codon-amino acid adaptor activity	1e-05	0.00120143		regulation of histone methylation	5e-05	0.029415		hemocyte migration	0.00036	0.221625		establishment of protein localization	1e-05	0.0017525		odorant binding	0.0004	0.25849		regulation of protein acetylation	0.00114	0.478938
binding, bridging	0.0001	0.028695		electron transport chain	1e-05	0.0043425		NADH dehydrogenase activity	1e-05	0.00155909		flavin-linked sulfhydryl oxidase activity	0.00195	0.64749		NADH dehydrogenase (quinone) activity	1e-05	0.00120143		metallochaperone activity	6e-05	0.029415		core-binding factor complex	0.0004	0.221625		cytoplasmic part	1e-05	0.0017525		molybdenum ion binding	0.00067	0.335402		regulation of histone acetylation	0.00114	0.478938
membrane-bounded organelle	0.00011	0.028695		mitochondrial part	2e-05	0.007272		oxidoreductase activity, acting on NAD(P)H, quinone or similar compound as acceptor	1e-05	0.00155909		thiol oxidase activity	0.00195	0.64749		cytoplasmic part	1e-05	0.00120143		negative regulation of histone methylation	0.00028	0.111337		macromolecular complex	0.00067	0.270819		intracellular organelle part	1e-05	0.0017525		DNA metabolic process	0.00139	0.44411		regulation of peptidyl-lysine acetylation	0.00114	0.478938
base pairing with mRNA	0.00014	0.028695		oxidoreductase activity, acting on NAD(P)H, quinone or similar compound as acceptor	4e-05	0.00850846		NADH dehydrogenase complex	1e-05	0.00155909		oxidoreductase activity, acting on a sulfur group of donors, oxygen as acceptor	0.00196	0.64749		mitochondrial membrane part	1e-05	0.00120143		ribosome biogenesis	0.00031	0.111337		small molecule catabolic process	0.00077	0.270819		nuclear part	1e-05	0.0017525		proton-transporting V-type ATPase, V1 domain	0.00154	0.44411		intraciliary retrograde transport	0.00119	0.478938
triplet codon-amino acid adaptor activity	0.00014	0.028695		NADH dehydrogenase (quinone) activity	4e-05	0.00850846		respiratory electron transport chain	1e-05	0.00155909		embryonic digestive tract development	0.00229	0.676963		metabolic process	1e-05	0.00120143		regulation of histone H4-K20 methylation	0.00035	0.111337		intracellular organelle part	0.00082	0.270819		organelle part	1e-05	0.0017525		proton-transporting ATPase activity, rotational mechanism	0.00158	0.44411		negative regulation of hippo signaling	0.00161	0.497689
base pairing with RNA	0.00017	0.028695		NADH dehydrogenase (ubiquinone) activity	4e-05	0.00850846		electron transport chain	1e-05	0.00155909		oxidoreductase activity	0.00278	0.707197		mitochondrial part	1e-05	0.00120143		phospholipid catabolic process	0.00069	0.149464		organelle part	0.001	0.284078		intracellular part	1e-05	0.0017525		proton-transporting V-type ATPase complex	0.00182	0.44411		intralumenal vesicle formation	0.00162	0.497689
base pairing	0.00017	0.028695		NADH dehydrogenase activity	5e-05	0.00850846		NADH dehydrogenase (quinone) activity	1e-05	0.00155909		ATP synthesis coupled electron transport	0.00305	0.707197		NADH dehydrogenase (ubiquinone) activity	1e-05	0.00120143		single-organism metabolic process	0.0007	0.149464		dynein complex	0.00114	0.284078		intracellular mRNA localization involved in anterior/posterior axis specification	3e-05	0.00399636		vacuole organization	0.00184	0.44411		regulation of histone H4-K16 acetylation	0.00225	0.497689
oxidoreductase activity, acting on NAD(P)H, quinone or similar compound as acceptor	0.00017	0.028695		mitochondrial respiratory chain complex I	6e-05	0.00850846		NADH dehydrogenase (ubiquinone) activity	1e-05	0.00155909		steroid biosynthetic process	0.00326	0.707197		NADH dehydrogenase activity	1e-05	0.00120143		carboxylic acid binding	0.00075	0.149464		DNA unwinding involved in DNA replication	0.00119	0.284078		intracellular mRNA localization involved in pattern specification process	3e-05	0.00399636		copulation	0.00227	0.448301		transferase activity, transferring phosphorus-containing groups	0.0027	0.497689
NADH dehydrogenase (quinone) activity	0.00017	0.028695		NADH dehydrogenase complex	6e-05	0.00850846		respiratory chain complex I	1e-05	0.00155909		sterol metabolic process	0.00332	0.707197		base pairing with mRNA	1e-05	0.00120143		organic acid binding	0.00075	0.149464		phospholipid catabolic process	0.00132	0.285168		intracellular transport	3e-05	0.00399636		hydrolase activity, acting on glycosyl bonds	0.00229	0.448301		regulation of Wnt protein secretion	0.00315	0.497689
NADH dehydrogenase (ubiquinone) activity	0.00017	0.028695		respiratory electron transport chain	6e-05	0.00850846		generation of precursor metabolites and energy	2e-05	0.00290833		endopeptidase Clp complex	0.0044	0.893911		base pairing with RNA	1e-05	0.00120143		protein serine/threonine kinase activator activity	0.00083	0.149464		positive regulation of intracellular transport	0.0018	0.305276		protein transport	4e-05	0.00506167		serine/threonine protein kinase complex	0.00257	0.448301		positive regulation of Wnt protein secretion	0.00315	0.497689
translation	0.00024	0.0360275		respiratory chain complex I	6e-05	0.00850846		oxidoreductase activity, acting on NAD(P)H	3e-05	0.00388		negative regulation of transcription from RNA polymerase III promoter	0.00507	0.893911		base pairing	1e-05	0.00120143		regulation of chromatin organization	0.00092	0.149464		organic substance catabolic process	0.00182	0.305276		pole plasm mRNA localization	7e-05	0.00712231		fatty acid alpha-oxidation	0.00257	0.448301		regulation of histone H4 acetylation	0.00369	0.497689
peripheral nervous system neuron development	0.00027	0.0360275		oxidation-reduction process	9e-05	0.00936333		binding, bridging	3e-05	0.00388		alcohol biosynthetic process	0.00581	0.893911		binding, bridging	1e-05	0.00120143		phosphoric diester hydrolase activity	0.00092	0.149464		lipid catabolic process	0.00195	0.305276		secondary active organic cation transmembrane transporter activity	0.00012	0.0127		proton-transporting two-sector ATPase complex	0.00283	0.448301		phosphorylation	0.0039	0.497689
NADH dehydrogenase activity	0.00029	0.0360275		base pairing with mRNA	9e-05	0.00936333		base pairing with mRNA	4e-05	0.00406389		nuclear pore nuclear basket	0.0069	0.893911		mitochondrial respiratory chain complex I	2e-05	0.00203588		N-acetyltransferase activity	0.00103	0.159215		dolichyl-diphosphooligosaccharide-protein glycotransferase activity	0.00225	0.305276		cytoplasmic transport	0.00013	0.0127		DNA replication	0.00289	0.448301		microtubule-based transport	0.00405	0.497689
mitochondrial respiratory chain complex I	0.00034	0.0360275		base pairing with RNA	9e-05	0.00936333		base pairing with RNA	4e-05	0.00406389		oxidoreductase activity, acting on NAD(P)H, quinone or similar compound as acceptor	0.00717	0.893911		NADH dehydrogenase complex	2e-05	0.00203588		transferase activity, transferring acyl groups other than amino-acyl groups	0.0012	0.160923		cytoplasmic dynein complex	0.0025	0.305276		organic cation transmembrane transporter activity	0.00016	0.0163287		oxidoreductase activity, acting on diphenols and related substances as donors, oxygen as acceptor	0.00318	0.465145		phosphotransferase activity, alcohol group as acceptor	0.0041	0.497689
cellular macromolecule biosynthetic process	0.00034	0.0360275		base pairing	9e-05	0.00936333		base pairing	4e-05	0.00406389		NADH dehydrogenase (quinone) activity	0.00717	0.893911		respiratory chain complex I	2e-05	0.00203588		ribonucleoprotein complex biogenesis	0.00124	0.160923		protein complex	0.00252	0.305276		pole plasm RNA localization	0.00019	0.0183672		female sex determination	0.00336	0.465145		intraciliary transport	0.00418	0.497689
NADH dehydrogenase complex	0.00034	0.0360275		triplet codon-amino acid adaptor activity	9e-05	0.00936333		triplet codon-amino acid adaptor activity	4e-05	0.00406389		NADH dehydrogenase (ubiquinone) activity	0.00717	0.893911		translation	3e-05	0.00281105		acetyltransferase activity	0.00125	0.160923		oligosaccharyltransferase complex	0.00264	0.305276		intracellular mRNA localization	0.0002	0.0183672		hydrolase activity, hydrolyzing O-glycosyl compounds	0.00356	0.469032		histone deacetylation	0.00433	0.497689
respiratory chain complex I	0.00034	0.0360275		oxidoreductase activity, acting on NAD(P)H	0.0001	0.00986842		metabolic process	6e-05	0.0057275		nuclear pore	0.00728	0.893911		respiratory electron transport chain	3e-05	0.00281105		histone methylation	0.00133	0.160923		eukaryotic translation initiation factor 4F complex	0.0029	0.305276		single-organism intracellular transport	0.00029	0.024373		monovalent cation:hydrogen antiporter activity	0.00402	0.469459		cytoskeleton-dependent intracellular transport	0.00441	0.497689
intracellular organelle	0.00035	0.0360275		generation of precursor metabolites and energy	0.00011	0.010463		chromatin silencing at telomere	7e-05	0.0057275		pore complex	0.00728	0.893911		oxidoreductase activity, acting on NAD(P)H	4e-05	0.00328727		hydrolase activity	0.00136	0.160923		motor activity	0.00306	0.305276		organic substance transport	0.00029	0.024373		vacuolar proton-transporting V-type ATPase, V1 domain	0.00404	0.469459		G-protein coupled receptor binding	0.00502	0.497689
respiratory electron transport chain	0.0004	0.0391786		binding, bridging	0.00013	0.0110719		cellular metabolic process	9e-05	0.00832762		NADH dehydrogenase activity	0.0076	0.893911		electron transport chain	4e-05	0.00328727		monosaccharide binding	0.00156	0.178496		organic acid catabolic process	0.00309	0.305276		establishment of localization in cell	0.00032	0.0260419		nuclear body	0.0041	0.469459		protein transporter activity	0.00508	0.497689
electron transport chain	0.00046	0.0426759		translation	0.00019	0.0163113		intracellular part	0.00011	0.00971364		mitochondrial respiratory chain complex I	0.00779	0.893911		cellular metabolic process	4e-05	0.00328727		ATP binding	0.00172	0.17884		carboxylic acid catabolic process	0.00309	0.305276		macromolecular complex	0.00042	0.0328845		condensin complex	0.00453	0.498502			0.00531	0.497689
macromolecule biosynthetic process	0.0005	0.0443996		metabolic process	0.00019	0.0163113		mitochondrial part	0.00012	0.00972083		NADH dehydrogenase complex	0.00779	0.893911		primary metabolic process	0.00011	0.0088187		N-acyltransferase activity	0.00183	0.17884		fatty acid alpha-oxidation	0.00311	0.305276		nucleoplasm part	0.00049	0.0371597		chromosomal part	0.00508	0.536477		histone H3-K27 acetylation	0.00544	0.497689
oxidoreductase activity, acting on NAD(P)H	0.00058	0.0492367		oxidoreductase complex	0.00031	0.0257792		membrane-bounded organelle	0.00012	0.00972083		respiratory chain complex I	0.00779	0.893911		RNA binding	0.00012	0.00916917		adenyl ribonucleotide binding	0.00187	0.17884		gamma-aminobutyric acid metabolic process	0.00316	0.305276		nucleic acid metabolic process	0.00051	0.0371597		cellular response to amino acid stimulus	0.00548	0.537324		satellite DNA binding	0.00567	0.497689
organelle	0.00062	0.0500658		oxidoreductase activity	0.00072	0.0577276		intracellular membrane-bounded organelle	0.0002	0.0159276		oxidoreductase activity, acting on NAD(P)H	0.00851	0.939824		generation of precursor metabolites and energy	0.00021	0.01575		regulation of compound eye retinal cell apoptotic process	0.00196	0.17884		single-organism catabolic process	0.00327	0.305276		RNA localization	0.00055	0.0371597		wing disc development	0.00563	0.537324		protein deacetylation	0.00576	0.497689
electron carrier activity	0.00063	0.0500658		organic substance biosynthetic process	0.00079	0.0610154		translation	0.00021	0.016115		AP-2 adaptor complex binding	0.00935	1		single-organism metabolic process	0.00022	0.0158315		copper chaperone activity	0.00197	0.17884		substrate-dependent cell migration, cell extension	0.00332	0.305276		ER to Golgi vesicle-mediated transport	0.00058	0.0371597		ubiquitin-dependent protein catabolic process via the multivesicular body sorting pathway	0.00574	0.537324		protein transport	0.00607	0.497689
biosynthetic process	0.00073	0.0547839		organelle part	0.00101	0.075043		cytoplasmic part	0.00024	0.0176978		oxidoreductase activity, acting on a sulfur group of donors	0.00978	1		cellular macromolecule biosynthetic process	0.00028	0.0186311		histone lysine methylation	0.00235	0.17884		cytoplasmic mRNA processing body	0.00344	0.305276		intestinal stem cell homeostasis	0.00059	0.0371597		positive regulation of cysteine-type endopeptidase activity involved in apoptotic process	0.00599	0.537324		protein phosphorylation	0.00718	0.497689
mitochondrial part	0.00074	0.0547839		ketone biosynthetic process	0.00108	0.0771711		cellular macromolecule biosynthetic process	0.00034	0.0242675		cell redox homeostasis	0.00998	1		oxidoreductase complex	0.00036	0.0240868		oxidoreductase activity, acting on single donors with incorporation of molecular oxygen, incorporation of two atoms of oxygen	0.00239	0.17884		histone binding	0.0036	0.305276		homeostasis of number of cells	0.00059	0.0371597		protein folding	0.00607	0.537324		ATP binding	0.00718	0.497689
negative regulation of neuron projection development	0.00082	0.0600145		cytochrome complex	0.0012	0.081047		primary metabolic process	0.00042	0.0289848		regulation of MAP kinase activity	0.01077	1		macromolecule biosynthetic process	0.00044	0.0289297		negative regulation of histone modification	0.00247	0.17884		primary metabolic process	0.00363	0.305276		metabolic process	0.00061	0.0371597		regulation of DNA replication	0.00637	0.544348		chaperonin-containing T-complex	0.00747	0.497689
cellular biosynthetic process	0.00112	0.0775057		cellular biosynthetic process	0.00122	0.081047		oxidoreductase complex	0.00044	0.0294507		organic hydroxy compound biosynthetic process	0.01113	1		organic substance biosynthetic process	0.00046	0.0292807		oxidoreductase activity, acting on single donors with incorporation of molecular oxygen	0.00263	0.17884		microtubule associated complex	0.00478	0.375285		extracellular space	0.00062	0.0371597		ESCRT complex	0.00657	0.544348		adenyl ribonucleotide binding	0.00749	0.497689
oxidation-reduction process	0.00128	0.0877616		biosynthetic process	0.00138	0.0897242		protein metabolic process	0.00047	0.0308226		1-phosphatidylinositol 4-kinase activity	0.01144	1		catalytic activity	0.00065	0.0401042		ER to Golgi vesicle-mediated transport	0.00265	0.17884		regulation of chromatin organization	0.00488	0.375285		mitotic G2/M transition checkpoint	0.00066	0.0378159		peptidase activator activity	0.00711	0.544348		mannan metabolic process	0.00762	0.497689
organic substance biosynthetic process	0.00151	0.102118		endosomal transport	0.00198	0.128544		macromolecule biosynthetic process	0.00056	0.0354688		cytoplasmic part	0.0118	1		cytochrome complex	0.00068	0.0407094		protein methylation	0.00268	0.17884		DNA duplex unwinding	0.00521	0.375285		small molecule biosynthetic process	0.00066	0.0378159			0.00729	0.544348		beta-mannosidase activity	0.00762	0.497689
plasmatocyte differentiation	0.0027	0.177999		protein metabolic process	0.00221	0.138776		glutathione transferase activity	0.00059	0.0358515		plasma membrane organization	0.01318	1		biosynthetic process	0.00072	0.0415097		protein alkylation	0.00268	0.17884		DNA geometric change	0.00521	0.375285		translation initiation factor binding	0.00069	0.0380591		hydrogen transport	0.00748	0.544348		mannan catabolic process	0.00762	0.497689
metabolic process	0.00273	0.177999		intracellular organelle	0.00224	0.138776		oxidation-reduction process	0.0006	0.0358515		ribosome binding	0.01363	1		cellular biosynthetic process	0.00074	0.0415097		positive regulation of histone modification	0.00271	0.17884		RNA cap binding	0.00548	0.375285		primary metabolic process	0.00071	0.0380591		proton transport	0.00748	0.544348		secretory granule	0.00808	0.497689
catalytic complex	0.00293	0.187501		intracellular organelle part	0.00231	0.139824		glutathione metabolic process	0.00079	0.0471997		kinase activity	0.01379	1		cellular protein metabolic process	0.00076	0.0415097		response to amino acid	0.0028	0.17884		single-organism carbohydrate metabolic process	0.00563	0.375285		cellular metabolic process	0.00073	0.0380591		protein maturation	0.00785	0.544348		ribonucleoside binding	0.00844	0.497689
generation of precursor metabolites and energy	0.0031	0.192179		electron carrier activity	0.00274	0.16523		organelle	0.00082	0.0477867		steroid metabolic process	0.01449	1		organic substance metabolic process	0.00089	0.0461776		membrane lipid catabolic process	0.00292	0.17884		mitochondrial small ribosomal subunit	0.00568	0.375285		intracellular protein transport	0.00077	0.0394183		N-acetylglucosamine metabolic process	0.00798	0.544348		amphisome	0.00846	0.497689
cytochrome complex	0.00326	0.196117		organelle	0.00331	0.197251		peptide metabolic process	0.00092	0.0526292		alanyl-tRNA aminoacylation	0.01503	1		oxidation-reduction process	0.0009	0.0461776		sphingolipid catabolic process	0.00292	0.17884		organellar small ribosomal subunit	0.00568	0.375285		nucleobase catabolic process	0.00081	0.0403632		heterochromatin organization	0.00834	0.544348		nucleoside binding	0.00883	0.497689
hemocyte differentiation	0.00374	0.222563		cellular macromolecule biosynthetic process	0.00382	0.227915		intracellular organelle	0.00098	0.0540192		alanine-tRNA ligase activity	0.01503	1		beta-N-acetylhexosaminidase activity	0.00253	0.139309		oxidoreductase activity, acting on paired donors, with incorporation or reduction of molecular oxygen	0.00295	0.17884		microtubule motor activity	0.00603	0.375285		Golgi organization	0.00094	0.0462334		oxidoreductase activity, acting on diphenols and related substances as donors	0.00861	0.544348		covalent chromatin modification	0.00898	0.497689
RNA binding	0.00384	0.22485		amyloid precursor protein metabolic process	0.00463	0.279921		transferase activity, transferring alkyl or aryl (other than methyl) groups	0.00129	0.0693087		epithelium development	0.01529	1		protein metabolic process	0.00262	0.140457		procollagen-proline 4-dioxygenase activity	0.00314	0.17884		AUA codon-amino acid adaptor activity	0.00606	0.375285		mitotic G2 DNA damage checkpoint	0.00101	0.0483712		protein processing	0.00865	0.544348		histone modification	0.00898	0.497689
oxidoreductase complex	0.00399	0.228891		intracellular membrane-bounded organelle	0.00482	0.287938		single-organism metabolic process	0.00133	0.0694043		respiratory electron transport chain	0.01543	1		hydrogen ion transmembrane transporter activity	0.00274	0.143731		procollagen-proline dioxygenase activity	0.00314	0.17884		protein heterotetramerization	0.00683	0.375285		cellular macromolecule localization	0.00102	0.0483712		solute:hydrogen antiporter activity	0.00881	0.544348		carbohydrate catabolic process	0.00899	0.497689
neuron development	0.00458	0.251645		hydrogen ion transmembrane transporter activity	0.00496	0.291291		catalytic complex	0.00146	0.0721869		electron transport chain	0.01617	1		oxidoreductase activity	0.0029	0.150402		MLL3/4 complex	0.00322	0.17884		cellular lipid catabolic process	0.00702	0.375285		response to stress	0.00111	0.050734		proteolysis	0.00888	0.544348		sensory perception of chemical stimulus	0.009	0.497689
mannosyltransferase activity	0.0046	0.251645		macromolecule biosynthetic process	0.00534	0.309173		organic substance metabolic process	0.00146	0.0721869		myosin I binding	0.01639	1		intracellular organelle part	0.00296	0.15158		vitamin binding	0.00325	0.17884		cellular amino acid catabolic process	0.00712	0.375285		ribonucleoprotein complex	0.00114	0.050734		ATPase activity, coupled to transmembrane movement of ions, rotational mechanism	0.00905	0.544348		intracellular transport	0.00903	0.497689
oxidoreductase activity	0.00532	0.293722		primary metabolic process	0.00564	0.312538		cellular amide metabolic process	0.0015	0.0723633		positive regulation of multicellular organism growth	0.0169	1		cellular macromolecule metabolic process	0.00351	0.182547		monocarboxylic acid binding	0.00326	0.17884		catalytic activity	0.00724	0.375285		COP9 signalosome	0.00114	0.050734		response to methotrexate	0.00909	0.544348		dorsal closure, elongation of leading edge cells	0.00906	0.497689
cytoplasmic part	0.00594	0.331991		embryonic digestive tract development	0.00577	0.312538		organelle part	0.00173	0.0819359		regulation of clathrin-mediated endocytosis	0.01699	1		hexosaminidase activity	0.0036	0.185878		fatty acid binding	0.00326	0.17884		oligosaccharyl transferase activity	0.00743	0.375285		G2 DNA damage checkpoint	0.00128	0.05617		proteasome assembly	0.01007	0.548869		oocyte anterior/posterior axis specification	0.0094	0.497689
adenylate kinase activity	0.00671	0.360383		cellular ketone metabolic process	0.00582	0.312538		cytochrome complex	0.00185	0.0859329		ribosomal protein S6 kinase activity	0.01714	1		organelle part	0.00411	0.212137		adenyl nucleotide binding	0.00331	0.17884		ciliary part	0.00757	0.375285		Golgi vesicle transport	0.00138	0.0592113		zymogen activation	0.01012	0.548869		intracellular protein transport	0.0096	0.497689
mature ribosome assembly	0.00671	0.360383		meiotic metaphase I	0.00584	0.312538		intracellular organelle part	0.00198	0.0877557		head involution	0.02033	1		G2/M transition of mitotic cell cycle	0.00421	0.214927		transferase activity, transferring acyl groups	0.0034	0.17884		histone acetyl-lysine binding	0.00764	0.375285		protein deacetylation	0.00139	0.0592113		lipid metabolic process	0.01017	0.548869		protein deacylation	0.00973	0.497689
glycolipid 6-alpha-mannosyltransferase activity	0.00692	0.360383		membrane-bounded organelle	0.00592	0.312538		cellular biosynthetic process	0.00199	0.0877557		omega peptidase activity	0.0216	1		electron carrier activity	0.00447	0.226417		peptidyl-proline 4-dioxygenase activity	0.00343	0.17884		axonemal dynein complex	0.00777	0.375285		eukaryotic translation initiation factor 4F complex	0.00148	0.0614219		CAAX-box protein processing	0.01036	0.548869		regulation of post-mating oviposition	0.00988	0.497689
glycolipid mannosyltransferase activity	0.00692	0.360383		intracellular part	0.00618	0.326298		macromolecule metabolic process	0.00206	0.0895456		pole cell fate determination	0.02169	1		ATP synthesis coupled electron transport	0.00462	0.23214		peptidyl-proline dioxygenase activity	0.00343	0.17884		regulation of protein acetylation	0.00781	0.375285		extracellular region part	0.00149	0.0614219		regulation of pH	0.01052	0.548869		DNA replication checkpoint	0.0099	0.497689
GDP-Man:Man1GlcNAc2-PP-Dol alpha-1,3-mannosyltransferase activity	0.00692	0.360383		ATP synthesis coupled electron transport	0.00642	0.333475		mitotic DNA damage checkpoint	0.00252	0.110036		nuclear periphery	0.02189	1		regulation of defense response to virus	0.00495	0.246996		N-methyltransferase activity	0.00353	0.17884		regulation of histone acetylation	0.00781	0.375285		cytosol	0.00152	0.0615396		monovalent inorganic cation homeostasis	0.01052	0.548869		AP-type membrane coat adaptor complex	0.01013	0.497689
nucleic acid binding	0.00863	0.46798		aerobic respiration	0.00649	0.333475		mitotic DNA integrity checkpoint	0.00281	0.121029		4-coumarate-CoA ligase activity	0.02197	1		aerobic respiration	0.00522	0.259443		positive regulation of chromosome organization	0.00354	0.17884		regulation of peptidyl-lysine acetylation	0.00781	0.375285		thermotaxis	0.00175	0.0700002		cation-transporting ATPase activity	0.01071	0.548869		DNA topoisomerase activity	0.01015	0.497689
alpha-1,6-mannosyltransferase activity	0.00925	0.500756		RNA binding	0.00665	0.340021		organic substance biosynthetic process	0.00286	0.121029		nuclear pore organization	0.02204	1		mitochondrial respiratory chain complex IV	0.00561	0.277905		regulation of histone H3-K9 trimethylation	0.00358	0.17884		ribonucleoprotein complex assembly	0.00791	0.375285		hydrogen peroxide metabolic process	0.00185	0.0700002		ATPase activity, coupled to transmembrane movement of ions	0.01071	0.548869		macroautophagy	0.01028	0.497689
protein metabolic process	0.00966	0.517027		protein localization to nuclear pore	0.00701	0.354702		protein N-acetylglucosaminyltransferase activity	0.00287	0.121029		regulation of response to drug	0.02208	1		respiratory chain complex IV	0.00561	0.277905		positive regulation of histone H3-K9 trimethylation	0.00358	0.17884		ribonucleoprotein complex	0.00838	0.375285		hydrogen peroxide catabolic process	0.00185	0.0700002		vacuolar part	0.01096	0.553476		transferase complex	0.01051	0.497689
nucleosomal DNA binding	0.0107	0.568869		mitochondrial respiratory chain complex IV	0.00722	0.354702		cytokinetic process	0.00298	0.123293		growth cone	0.02286	1		UDP-galactose:beta-N-acetylglucosamine beta-1,3-galactosyltransferase activity	0.00572	0.278217		Cul5-RING ubiquitin ligase complex	0.00363	0.17884		regulation of histone modification	0.00842	0.375285		cellular response to hydrogen peroxide	0.00185	0.0700002		nucleic acid metabolic process	0.01164	0.554863		receptor signaling protein serine/threonine kinase activity	0.01059	0.497689
UDP-glucosyltransferase activity	0.01073	0.568869		respiratory chain complex IV	0.00722	0.354702		cellular protein metabolic process	0.00313	0.127307		site of polarized growth	0.02286	1		oxidoreductase activity, acting on a heme group of donors	0.00639	0.297699		glycosylphosphatidylinositol diacylglycerol-lyase activity	0.00365	0.17884		condensed chromosome, centromeric region	0.00853	0.375285		post-embryonic development	0.00207	0.0768909		catechol oxidase activity	0.01191	0.554863		positive regulation of JUN kinase activity	0.0109	0.497689
dendrite development	0.01128	0.587246		Rho guanyl-nucleotide exchange factor activity	0.00729	0.354702		tripeptidase activity	0.00331	0.131205		positive regulation of cellular protein metabolic process	0.02291	1		oxidoreductase activity, acting on a heme group of donors, oxygen as acceptor	0.00639	0.297699		cellular macromolecular complex assembly	0.00373	0.17884		condensed nuclear chromosome, centromeric region	0.00853	0.375285		mitotic DNA integrity checkpoint	0.00225	0.0817855		L-DOPA monooxygenase activity	0.01191	0.554863		adenyl nucleotide binding	0.01112	0.497689
ATP synthesis coupled electron transport	0.0115	0.587246		catalytic complex	0.00743	0.355343		RNA binding	0.00331	0.131205		positive regulation of protein metabolic process	0.02363	1		heme-copper terminal oxidase activity	0.00639	0.297699		nucleoside binding	0.00376	0.17884		phospholipase activity	0.00871	0.375285		protein transporter activity	0.00226	0.0817855		dopamine monooxygenase activity	0.01191	0.554863		primary sex determination	0.01116	0.497689
UDP-glucose:glycoprotein glucosyltransferase activity	0.01154	0.587246		protein folding	0.00774	0.365949		biosynthetic process	0.0044	0.178217		chitin binding	0.02484	1		cytochrome-c oxidase activity	0.00639	0.297699		positive regulation of histone methylation	0.00393	0.183301		cellular catabolic process	0.00883	0.375285		cellular macromolecule metabolic process	0.0023	0.0822677		primary metabolic process	0.01203	0.554863		kinase activity	0.01122	0.497689
cell part	0.01181	0.587246		proteasome binding	0.00797	0.375626		cellular modified amino acid metabolic process	0.00518	0.214256		regulation of transcription from RNA polymerase III promoter	0.02619	1		death domain binding	0.00695	0.321129		regulation of chromosome organization	0.00396	0.183301		amino acid binding	0.00891	0.375285		response to oxidative stress	0.00261	0.0933321		hydrogen ion transmembrane transport	0.01227	0.554863		UDP-galactose transmembrane transporter activity	0.01127	0.497689
mannan endo-1,6-alpha-mannosidase activity	0.01181	0.587246		cellular protein metabolic process	0.00851	0.376111		mitotic cell cycle checkpoint	0.00535	0.220061		integral component of peroxisomal membrane	0.02699	1		ubiquitin homeostasis	0.00777	0.360241		purine ribonucleoside triphosphate binding	0.0042	0.190056		positive regulation of nucleocytoplasmic transport	0.00904	0.375285		mitotic DNA damage checkpoint	0.00279	0.0957823		sperm individualization	0.01266	0.554863		ribonucleotide binding	0.01128	0.497689
CCAAT-binding factor complex	0.01204	0.588749		cytochrome-c oxidase activity	0.00855	0.376111		cellular macromolecule metabolic process	0.00572	0.228783		cholesterol metabolic process	0.02755	1		cellular respiration	0.00787	0.360241		sodium channel activity	0.00444	0.190056		axoneme part	0.0092	0.375285		cellular response to DNA damage stimulus	0.00279	0.0957823		amylase activity	0.01316	0.554863		phosphorylase kinase complex	0.01129	0.497689
zeta DNA polymerase complex	0.0122	0.588749		oxidoreductase activity, acting on a heme group of donors	0.00855	0.376111		endoribonuclease activity, producing 5'-phosphomonoesters	0.00577	0.228783		regulation of synaptic growth at neuromuscular junction	0.02862	1		response to lithium ion	0.00808	0.366655		purine nucleoside binding	0.00447	0.190056		sodium-dependent multivitamin transmembrane transporter activity	0.00927	0.375285		macromolecule metabolic process	0.00282	0.0957823		alpha-amylase activity	0.01316	0.554863		purine ribonucleoside triphosphate binding	0.01146	0.497689
cellular protein metabolic process	0.01304	0.588749		oxidoreductase activity, acting on a heme group of donors, oxygen as acceptor	0.00855	0.376111		ncRNA catabolic process	0.0058	0.228783		phosphotransferase activity, alcohol group as acceptor	0.02872	1		nucleotide catabolic process	0.00876	0.393175		purine ribonucleotide binding	0.00447	0.190056		nuclear transcription factor complex	0.00949	0.375285		stem cell proliferation	0.00285	0.0957823		plasma membrane proton-transporting V-type ATPase complex	0.01324	0.554863		posterior midgut development	0.01154	0.497689
intracellular part	0.01334	0.588749		heme-copper terminal oxidase activity	0.00855	0.376111		rRNA catabolic process	0.0058	0.228783		protein kinase C deactivation	0.02888	1		nucleoside phosphate catabolic process	0.00893	0.393175		purine ribonucleoside binding	0.00447	0.190056		single-organism membrane fusion	0.00955	0.375285		trans-Golgi network	0.0029	0.0959351		cyclin-dependent protein kinase activity	0.01328	0.554863		purine nucleoside binding	0.01187	0.497689
heterocyclic compound binding	0.01354	0.588749		ER to Golgi vesicle-mediated transport	0.0087	0.377505		oxidoreductase activity	0.006	0.23581		regulation of translational initiation	0.02895	1		monovalent inorganic cation transmembrane transporter activity	0.00896	0.393175		ubiquitin protein ligase binding	0.00455	0.190056		establishment of chromatin silencing	0.00985	0.375285		regulation of immune response	0.00296	0.0965605		cyclin-dependent protein serine/threonine kinase activity	0.01328	0.554863		purine ribonucleotide binding	0.01187	0.497689
aerobic respiration	0.01363	0.588749		purine ribonucleoside triphosphate metabolic process	0.00897	0.380146		DNA damage checkpoint	0.00628	0.240081		protein complex subunit organization	0.02907	1		macromolecule metabolic process	0.00919	0.398417		small conjugating protein ligase binding	0.00455	0.190056		positive regulation of histone H3-K9 dimethylation	0.00985	0.375285		SNARE complex	0.00345	0.109865		sodium:hydrogen antiporter activity	0.0135	0.554863		purine ribonucleoside binding	0.01187	0.497689
negative regulation of metaphase/anaphase transition of cell cycle	0.01422	0.588749		purine nucleoside triphosphate metabolic process	0.00897	0.380146		uracil DNA N-glycosylase activity	0.0064	0.240081		generation of precursor metabolites and energy	0.02927	1		germarium-derived cystoblast division	0.00932	0.398751		IkappaB kinase complex	0.00469	0.190749		regulation of histone H3-K9 dimethylation	0.00985	0.375285		cellular response to stress	0.00347	0.109865		proton-transporting two-sector ATPase complex, catalytic domain	0.01352	0.554863		resolution of meiotic recombination intermediates	0.01206	0.497689
negative regulation of mitotic metaphase/anaphase transition	0.01422	0.588749		ribonucleoside triphosphate metabolic process	0.0096	0.401597		deaminated base DNA N-glycosylase activity	0.0064	0.240081		phosphatidylinositol-mediated signaling	0.02929	1		nucleobase-containing compound catabolic process	0.01037	0.438444		IkappaB kinase activity	0.00469	0.190749		regulation of extent of heterochromatin assembly	0.00985	0.375285		nuclear body	0.0035	0.109865		nucleotide-excision repair	0.01405	0.572951		alpha-glucosidase activity	0.01214	0.497689
structural constituent of eye lens	0.01429	0.588749		cellular metabolic process	0.00979	0.401597		single-strand selective uracil DNA N-glycosylase activity	0.0064	0.240081		inositol lipid-mediated signaling	0.02929	1		purine NTP-dependent helicase activity	0.01054	0.438444		meiotic nuclear division	0.00479	0.190853		positive regulation of extent of heterochromatin assembly	0.00985	0.375285		cellular amino acid biosynthetic process	0.00355	0.109865		carbohydrate metabolic process	0.01419	0.572951		carbohydrate derivative binding	0.0124	0.497689
regulation of cell-cell adhesion mediated by integrin	0.01431	0.588749		nucleoside triphosphate metabolic process	0.00983	0.401597		energy derivation by oxidation of organic compounds	0.00705	0.269641		regulation of protein serine/threonine kinase activity	0.02929	1		ATP-dependent helicase activity	0.01054	0.438444		ethanolamine-containing compound metabolic process	0.00483	0.190853		regulation of chromosome organization	0.01036	0.375285		DNA conformation change	0.00358	0.109865		prefoldin complex	0.01447	0.575646		regulation of mitotic cell cycle	0.01256	0.497689
PcG protein complex	0.01458	0.588749		biological_process	0.01001	0.401597		protein complex	0.00727	0.27309		presynaptic active zone	0.02929	1		intracellular organelle	0.01139	0.475901		L-ascorbic acid binding	0.00493	0.190853		transcription elongation from RNA polymerase II promoter	0.01041	0.375285		GUG codon-amino acid adaptor activity	0.00368	0.110585		peptidyl-dipeptidase activity	0.01497	0.587088		nonmotile primary cilium assembly	0.01266	0.497689
hydrogen ion transmembrane transporter activity	0.01466	0.588749		structural constituent of eye lens	0.01002	0.401597		DNA integrity checkpoint	0.00766	0.282608		ribonucleoprotein complex binding	0.02936	1		regulation of cell proliferation involved in compound eye morphogenesis	0.01183	0.475901		histone methyltransferase activity	0.00501	0.190853		membrane fusion	0.01055	0.375285		nucleotidyltransferase activity	0.00372	0.110585		protein N-linked glycosylation	0.01538	0.587088		organic substance catabolic process	0.0127	0.497689
organic cyclic compound binding	0.01476	0.588749		cellular respiration	0.01045	0.418291		hydrogen ion transmembrane transporter activity	0.00766	0.282608		oxidoreductase complex	0.02965	1		cellular nitrogen compound catabolic process	0.01204	0.475901		ribonucleoside binding	0.00502	0.190853		ligase activity, forming carbon-nitrogen bonds	0.01061	0.375285		acetyltransferase activity	0.00375	0.110585		tRNA splicing, via endonucleolytic cleavage and ligation	0.01575	0.587088		purine nucleotide binding	0.01294	0.497689
axon extension involved in axon guidance	0.01484	0.588749		negative regulation of protein export from nucleus	0.01058	0.419035		chromatin silencing at centromere	0.00791	0.289734		positive regulation of cellular catabolic process	0.03011	1		positive regulation of organelle assembly	0.01208	0.475901		S-adenosylmethionine-dependent methyltransferase activity	0.00518	0.193501		catalytic complex	0.01082	0.375285		cis-Golgi network	0.00379	0.110585		RNA splicing, via endonucleolytic cleavage and ligation	0.01575	0.587088		single-organism intracellular transport	0.0131	0.497689
neuron projection extension involved in neuron projection guidance	0.01484	0.588749		protein import into peroxisome matrix	0.01176	0.470012		ATP synthesis coupled electron transport	0.00842	0.306104		transferase activity, transferring phosphorus-containing groups	0.03012	1		positive regulation of cytoplasmic mRNA processing body assembly	0.01208	0.475901		3'-5'-exoribonuclease activity	0.00525	0.193501		CDP-diacylglycerol biosynthetic process	0.01114	0.375285		regulation of vesicle fusion	0.00392	0.11331		sugar transmembrane transporter activity	0.01585	0.587088		establishment of protein localization	0.01329	0.497689
menaquinone metabolic process	0.01493	0.588749		single-organism intracellular transport	0.01211	0.473039		RNA-DNA hybrid ribonuclease activity	0.00843	0.306104		phosphatidylinositol kinase activity	0.03041	1		aromatic compound catabolic process	0.01211	0.475901		DNA metabolic process	0.00529	0.193501		CDP-diacylglycerol metabolic process	0.01114	0.375285		ribonucleoprotein complex assembly	0.004	0.113921		response to pain	0.01623	0.587088		carbonate dehydratase activity	0.01335	0.497689
menaquinone biosynthetic process	0.01493	0.588749		Rap protein signal transduction	0.0123	0.473039		actomyosin contractile ring assembly	0.00882	0.306693		chitin metabolic process	0.03058	1		organophosphate catabolic process	0.01266	0.487705		carbohydrate binding	0.00545	0.19383		phosphatidate cytidylyltransferase activity	0.01114	0.375285		sperm competition	0.0041	0.114874		behavioral response to pain	0.01623	0.587088		sensory perception of smell	0.01339	0.497689
alpha,alpha-trehalose-phosphate synthase (UDP-forming) activity	0.01525	0.588749		ecdysteroid biosynthetic process	0.01237	0.473039		actomyosin contractile ring organization	0.00882	0.306693		alkaline phosphatase activity	0.03205	1		heterocycle catabolic process	0.01269	0.487705		DNA hypermethylation	0.00549	0.19383		catabolic process	0.01152	0.375285		nuclear speck	0.00413	0.114874		multicellular organismal response to stress	0.01623	0.587088		methylosome	0.01362	0.497689
negative regulation of mitosis	0.01557	0.588749		regulation of terminal button organization	0.01239	0.473039		lysine N-methyltransferase activity	0.00885	0.306693		oxidation-reduction process	0.03224	1		organic cyclic compound catabolic process	0.01368	0.524632		regulation of DNA methylation	0.00549	0.19383		cystoblast division	0.01168	0.375285		single-organism localization	0.0043	0.116775		somatic sex determination	0.01688	0.599912		pICln-Sm protein complex	0.01362	0.497689
mitochondrial respiratory chain complex IV	0.01571	0.588749		ribosomal small subunit biogenesis	0.01257	0.475227		protein-lysine N-methyltransferase activity	0.00885	0.306693		lipid biosynthetic process	0.03228	1		fatty acid elongase activity	0.01432	0.52843		organic substance catabolic process	0.00619	0.215541		cytoskeletal anchoring at plasma membrane	0.01175	0.375285		single-organism cellular localization	0.0043	0.116775		bicoid mRNA localization	0.01709	0.600801		protein serine/threonine/tyrosine kinase activity	0.01375	0.497689
respiratory chain complex IV	0.01571	0.588749		female pronucleus assembly	0.01277	0.478479		histone-lysine N-methyltransferase activity	0.00885	0.306693		oocyte development	0.03238	1		fatty acid elongation	0.01432	0.52843		cullin-RING ubiquitin ligase complex	0.00629	0.216401		DNA-templated transcription, elongation	0.01182	0.375285		chromosome	0.00444	0.118353		carbohydrate transmembrane transporter activity	0.01762	0.605903		ion gated channel activity	0.01398	0.497689
regeneration	0.01602	0.588749		organic substance metabolic process	0.01309	0.487843		acyl-CoA oxidase activity	0.00897	0.307396		positive regulation of catabolic process	0.03244	1		mediator complex	0.01446	0.52843		JUN kinase activity	0.00657	0.22432		microtubule-based movement	0.01185	0.375285		5-formyltetrahydrofolate cyclo-ligase activity	0.00445	0.118353		carbohydrate transporter activity	0.01762	0.605903		response to UV-B	0.01429	0.497689
metamorphosis	0.0166	0.588749						aerobic respiration	0.00902	0.307396		metabolic process	0.03354	1		organelle	0.01458	0.52843		macromolecule methylation	0.00707	0.233923		mitotic spindle organization	0.01194	0.375285		organic acid biosynthetic process	0.00482	0.1254		5S rRNA binding	0.01785	0.605903		MAP kinase activity	0.0143	0.497689
macromolecular complex	0.01662	0.588749						sulfur compound metabolic process	0.0092	0.310751		germ cell development	0.03364	1		UDP-galactosyltransferase activity	0.01586	0.572951		I-kappaB phosphorylation	0.00714	0.233923		establishment of protein localization to endoplasmic reticulum	0.01211	0.375285		carboxylic acid biosynthetic process	0.00482	0.1254		activation of cysteine-type endopeptidase activity	0.01788	0.605903		axon cargo transport	0.01454	0.497689
negative regulation of nuclear division	0.01673	0.588749						endonuclease activity, active with either ribo- or deoxyribonucleic acids and producing 5'-phosphomonoesters	0.00942	0.316242		regulation of synapse assembly	0.03365	1		purine ribonucleoside triphosphate metabolic process	0.01659	0.580338		ribonucleotide binding	0.00741	0.233923		SRP-dependent cotranslational protein targeting to membrane	0.01211	0.375285		larval development	0.00487	0.125744		positive regulation of cysteine-type endopeptidase activity	0.01848	0.619423		6-phosphogluconolactonase activity	0.01462	0.497689
regulation of response to external stimulus	0.01699	0.588749						serine-type endopeptidase activity	0.00966	0.320977		photoreceptor cell axon guidance	0.03386	1		purine nucleoside triphosphate metabolic process	0.01659	0.580338		methylation	0.00751	0.233923		protein targeting to ER	0.01211	0.375285		anterior midgut invagination	0.00508	0.128465		carboxy-terminal domain protein kinase complex	0.01865	0.619621		ectodermal cell fate determination	0.0147	0.497689
glucosyltransferase activity	0.0176	0.588749						mitochondrial respiratory chain complex IV	0.00991	0.321893		segmentation	0.03426	1		succinate-CoA ligase complex (GDP-forming)	0.01663	0.580338		intestinal stem cell homeostasis	0.00752	0.233923		positive regulation of transport	0.01272	0.375285		ribonucleoprotein complex subunit organization	0.00509	0.128465		regulation of compound eye retinal cell apoptotic process	0.01964	0.643901		MAP kinase kinase activity	0.01523	0.509208
NADP binding	0.01769	0.588749						respiratory chain complex IV	0.00991	0.321893		ARF guanyl-nucleotide exchange factor activity	0.03452	1		ribonucleoside triphosphate metabolic process	0.01733	0.599354		homeostasis of number of cells	0.00752	0.233923		vitamin transmembrane transporter activity	0.01289	0.375285		copper ion homeostasis	0.00523	0.130476		histone locus body	0.01989	0.643901		single-organism catabolic process	0.01606	0.52492
Dsl1p complex	0.01779	0.588749						GPI anchor biosynthetic process	0.01033	0.332941		mitochondrion	0.03578	1		nucleoside triphosphate metabolic process	0.01764	0.601352		glucosidase activity	0.00765	0.233923		organelle fusion	0.01328	0.375285		phosphatidylcholine 1-acylhydrolase activity	0.00543	0.134837		NADPH regeneration	0.02025	0.643901		carbon-oxygen lyase activity	0.01621	0.52492
ribosome assembly	0.01806	0.588749						regulation of DNA biosynthetic process	0.01039	0.332941		eukaryotic translation initiation factor 3 complex	0.03637	1		protein stabilization	0.01798	0.601441		small molecule binding	0.00773	0.233923		aminoacylase activity	0.01353	0.375285		mitotic cell cycle checkpoint	0.00552	0.136488		pentose-phosphate shunt	0.02025	0.643901		ncRNA polyadenylation	0.01623	0.52492
lamellocyte differentiation	0.01853	0.588749						endopeptidase activity	0.01084	0.345142		positive regulation of transporter activity	0.03734	1		protein localization to cell cortex	0.01802	0.601441		cellular response to amino acid stimulus	0.00774	0.233923		hydrolase activity, acting on carbon-nitrogen (but not peptide) bonds, in linear amides	0.01353	0.375285		oxoacid metabolic process	0.00563	0.136488		CAG codon-amino acid adaptor activity	0.02101	0.643901		ncRNA polyadenylation involved in polyadenylation-dependent ncRNA catabolic process	0.01623	0.52492
cytochrome-c oxidase activity	0.01866	0.588749						protein glycosylation in endoplasmic reticulum	0.01142	0.350331		positive regulation of ion transmembrane transporter activity	0.03734	1		intracellular membrane-bounded organelle	0.01846	0.610236		covalent chromatin modification	0.00778	0.233923		ribonucleoprotein complex subunit organization	0.01362	0.375285		organic acid metabolic process	0.00563	0.136488		female somatic sex determination	0.02145	0.643901		meiotic chromosome separation	0.01652	0.526142
oxidoreductase activity, acting on a heme group of donors	0.01866	0.588749						histone methyltransferase activity	0.01148	0.350331		negative regulation of JUN kinase activity	0.03783	1		integral component of mitochondrial inner membrane	0.01885	0.613945		histone modification	0.00778	0.233923		cytidine catabolic process	0.01363	0.375285		single-organism organelle organization	0.00577	0.136734		organic substance metabolic process	0.02172	0.643901		secondary metabolite biosynthetic process	0.01659	0.526142
oxidoreductase activity, acting on a heme group of donors, oxygen as acceptor	0.01866	0.588749						death domain binding	0.0116	0.350331		glucosamine-containing compound metabolic process	0.03827	1		succinate-CoA ligase complex	0.02	0.629341		glycerol-3-phosphate dehydrogenase complex	0.00778	0.233923		cytidine deaminase activity	0.01363	0.375285		positive regulation of immune response	0.0058	0.136734		mannose metabolic process	0.02184	0.643901		positive regulation of protein exit from endoplasmic reticulum	0.01689	0.530598
heme-copper terminal oxidase activity	0.01866	0.588749						cytochrome-c oxidase activity	0.01169	0.350331		macromolecular complex subunit organization	0.03877	1		Golgi to plasma membrane protein transport	0.02003	0.629341		positive regulation of histone H3-K9 methylation	0.00793	0.233923		cytidine metabolic process	0.01363	0.375285		organic substance metabolic process	0.0058	0.136734		monosaccharide transmembrane transporter activity	0.02194	0.643901		telomere cap complex	0.01758	0.542235
ATP metabolic process	0.01898	0.588749						oxidoreductase activity, acting on a heme group of donors	0.01169	0.350331		amino sugar metabolic process	0.03887	1		establishment of protein localization to plasma membrane	0.02003	0.629341		regulation of histone H3-K9 methylation	0.00793	0.233923		cytidine deamination	0.01363	0.375285		protein secretion	0.00601	0.139622		inositol metabolic process	0.02215	0.643901		nuclear chromosome, telomeric region	0.01758	0.542235
serine-type endopeptidase activity	0.01918	0.588749						oxidoreductase activity, acting on a heme group of donors, oxygen as acceptor	0.01169	0.350331		regulation of synapse organization	0.04113	1		catalytic complex	0.02013	0.629341		regulation of protein acetylation	0.0083	0.236897		vascular endothelial growth factor receptor signaling pathway	0.01368	0.375285		GCU codon-amino acid adaptor activity	0.00641	0.14714		endosomal part	0.02239	0.643901		proteasome regulatory particle	0.01873	0.576879
negative regulation of response to external stimulus	0.01965	0.588749						heme-copper terminal oxidase activity	0.01169	0.350331		actin filament organization	0.0415	1		fatty acid synthase activity	0.02044	0.631839		regulation of histone acetylation	0.0083	0.236897		pyrimidine nucleoside catabolic process	0.01385	0.375285		oxidoreductase activity, acting on the CH-NH group of donors, NAD or NADP as acceptor	0.00641	0.14714		contractile ring localization	0.0225	0.643901		intraciliary transport particle A	0.0189	0.577317
neuron projection development	0.01969	0.588749						oxidoreductase activity, acting on the CH-CH group of donors, oxygen as acceptor	0.01186	0.353563		glutamine metabolic process	0.0415	1		beta-1,3-galactosyltransferase activity	0.02065	0.631839		regulation of peptidyl-lysine acetylation	0.0083	0.236897		pyrimidine ribonucleoside catabolic process	0.01385	0.375285		oxidoreductase activity, acting on the CH-NH group of donors	0.00658	0.149585		actomyosin contractile ring localization	0.0225	0.643901		regulation of protein exit from endoplasmic reticulum	0.01907	0.579194
macromolecule metabolic process	0.02072	0.588749						endoribonuclease activity	0.01202	0.356554		extracellular region	0.04188	1		cellular component biogenesis	0.0209	0.631839		regulation of meiotic cell cycle	0.00839	0.236897		cytidylyltransferase activity	0.01386	0.375285		SET domain binding	0.00665	0.149585		regulation of DNA endoreduplication	0.02267	0.643901		four-way junction DNA binding	0.01953	0.585374
DNA secondary structure binding	0.021	0.588749						assembly of actomyosin apparatus involved in cytokinesis	0.01242	0.368723		chaperone binding	0.0424	1		intracellular part	0.02102	0.631839		MAP kinase activity	0.00841	0.236897		sterol metabolic process	0.01396	0.375285		developmental maturation	0.00669	0.149585		ribonucleoside-diphosphate reductase complex	0.02294	0.643901		exodeoxyribonuclease I activity	0.02008	0.58998
regulation of alternative mRNA splicing, via spliceosome	0.02109	0.588749						cell cycle checkpoint	0.01271	0.374703		alcohol metabolic process	0.04268	1		membrane-bounded organelle	0.02164	0.642517		lipid particle organization	0.00851	0.237353		positive regulation of synaptic transmission, cholinergic	0.01398	0.375285		histone deacetylation	0.00703	0.152343		oxidoreductase activity, acting on CH or CH2 groups, disulfide as acceptor	0.02294	0.643901		mitotic G2 DNA damage checkpoint	0.02027	0.58998
protein complex	0.02127	0.588749						glucan catabolic process	0.0131	0.375707		translation factor activity, nucleic acid binding	0.04363	1		positive regulation of translation	0.02257	0.663879		sphingomyelin catabolic process	0.0086	0.237353		nucleotidyltransferase activity	0.0142	0.375285		neural precursor cell proliferation	0.00704	0.152343		ribonucleoside-diphosphate reductase activity, thioredoxin disulfide as acceptor	0.02294	0.643901		establishment of oocyte nucleus localization involved in oocyte dorsal/ventral axis specification	0.02028	0.58998
serine-type peptidase activity	0.02163	0.588749						glycogen catabolic process	0.0131	0.375707		synapse	0.044	1		male meiosis	0.02283	0.666636		epithelial cell type specification, open tracheal system	0.00876	0.237353		single-organism metabolic process	0.01432	0.375285		neuroblast proliferation	0.00704	0.152343		apoptotic cell clearance	0.02298	0.643901		cellular response to ethanol	0.02063	0.595029
positive regulation of biosynthetic process of antibacterial peptides active against Gram-negative bacteria	0.02184	0.588749						glycogen phosphorylase activity	0.0131	0.375707		structural constituent of nuclear pore	0.04538	1		fatty acid biosynthetic process	0.02386	0.695769		regulation of histone H4-K16 acetylation	0.00879	0.237353		protein polyglycylation	0.01444	0.375285		structure-specific DNA binding	0.00712	0.152343		cellular lipid metabolic process	0.02305	0.643901		epidermis morphogenesis	0.02066	0.595029
negative regulation of cell-substrate adhesion	0.02202	0.588749						replicative senescence	0.01337	0.375707		establishment of epithelial cell planar polarity	0.04625	1		regulation of cytoplasmic mRNA processing body assembly	0.02508	0.722353		purine nucleotide binding	0.00887	0.237353		killing of cells of other organism	0.0145	0.375285		protein phosphatase activator activity	0.00714	0.152343		ubiquitin ligase complex	0.02334	0.64453		chloride transmembrane transporter activity	0.02136	0.602713
negative regulation of focal adhesion assembly	0.02202	0.588749						histone H2A phosphorylation	0.01337	0.375707		regulation of endocytosis	0.04659	1		mitochondrial inner membrane	0.02556	0.733443		aminopeptidase activity	0.00897	0.23873		cell killing	0.0145	0.375285		protein tyrosine phosphatase activator activity	0.00714	0.152343		NMS complex	0.02382	0.64453		G2 DNA damage checkpoint	0.02147	0.602713
regulation of protein kinase B signaling	0.02202	0.588749						mRNA export from nucleus in response to heat stress	0.01338	0.375707		protein folding	0.04704	1		inorganic cation transmembrane transporter activity	0.02703	0.742934		monosaccharide transport	0.00964	0.256196		cytolysis in other organism	0.0145	0.375285		phosphatase activator activity	0.00714	0.152343		chromatin	0.02408	0.64453		cellular response to starvation	0.02149	0.602713
regulation of focal adhesion assembly	0.02202	0.588749						mitotic G2 DNA damage checkpoint	0.01408	0.394075		histone deacetylase activity	0.04722	1		succinate-CoA ligase (GDP-forming) activity	0.02704	0.742934		regulation of synaptic transmission, glutamatergic	0.00984	0.259365		modification of morphology or physiology of other organism	0.0145	0.375285		chromosome organization	0.00767	0.160666		monosaccharide transport	0.02419	0.64453		protein kinase activity	0.02156	0.602713
negative regulation of protein kinase B signaling	0.02202	0.588749						protein localization to chromosome, centromeric region	0.01433	0.397298		protein deacetylase activity	0.04722	1		ATP-dependent RNA helicase activity	0.02721	0.742934		chromosome organization	0.01001	0.263277		disruption of cells of other organism	0.0145	0.375285		DNA damage checkpoint	0.00767	0.160666		primary alcohol metabolic process	0.02444	0.64453		RNA 3'-end processing	0.02187	0.603726
negative regulation of axon regeneration	0.02202	0.588749						transferase activity, transferring glycosyl groups	0.01452	0.39888		phosphatidylinositol metabolic process	0.04811	1		RNA-dependent ATPase activity	0.02721	0.742934		peptidyl-threonine dephosphorylation	0.01037	0.271162		UDP-glucose:hexose-1-phosphate uridylyltransferase activity	0.015	0.375285		protein deacylation	0.00769	0.160666		ethanol oxidation	0.02444	0.64453		establishment of localization in cell	0.02212	0.603726
negative regulation of cell-matrix adhesion	0.02202	0.588749						G2 DNA damage checkpoint	0.01458	0.39888		female germline ring canal	0.0486	1		organelle inner membrane	0.02799	0.742934		transferase activity, transferring one-carbon groups	0.01076	0.27913		galactose homeostasis	0.015	0.375285		cellular response to gamma radiation	0.00793	0.162046		ethanol metabolic process	0.02444	0.64453		maintenance of actomyosin contractile ring localization	0.02234	0.603726
regulation of cell-substrate junction assembly	0.02202	0.588749						cellular respiration	0.01477	0.401131		regulation of growth	0.0487	1		poly-purine tract binding	0.02805	0.742934		monocarboxylic acid transport	0.0108	0.27913		carbohydrate biosynthetic process	0.01507	0.375285		nitrogen compound metabolic process	0.00796	0.162046		protein catabolic process	0.02497	0.652859		septin cytoskeleton organization	0.02234	0.603726
phosphatidylinositol-3,4-bisphosphate 3-phosphatase activity	0.02202	0.588749						primary miRNA processing	0.01497	0.401476		positive regulation of metaphase/anaphase transition of cell cycle	0.04914	1		poly(A) binding	0.02805	0.742934		metabolic process	0.01091	0.280186		nitrogen compound metabolic process	0.01517	0.375285		cellular nitrogen compound metabolic process	0.00806	0.162046		DNA biosynthetic process	0.0254	0.653401		septin ring organization	0.02234	0.603726
negative regulation of cell junction assembly	0.02202	0.588749						cytoplasmic transport, nurse cell to oocyte	0.01517	0.401476		positive regulation of mitotic metaphase/anaphase transition	0.04914	1		purine nucleoside metabolic process	0.02812	0.742934		cell tip	0.01104	0.280186		mRNA splice site selection	0.0154	0.375285		ectoderm and mesoderm interaction	0.00807	0.162046		ceramide metabolic process	0.02575	0.653401		pyrimidine nucleotide-sugar transmembrane transporter activity	0.02256	0.605363
negative regulation of neuron projection regeneration	0.02202	0.588749						cellular polysaccharide catabolic process	0.01531	0.401476		positive regulation of mitosis	0.04914	1		purine ribonucleoside metabolic process	0.02812	0.742934		organic hydroxy compound catabolic process	0.01114	0.280186		cotranslational protein targeting to membrane	0.01542	0.375285		DNA repair	0.00809	0.162046		macromolecule catabolic process	0.02583	0.653401		phosphorylation of RNA polymerase II C-terminal domain	0.0234	0.625909
phosphatidylinositol-3,4,5-trisphosphate 3-phosphatase activity	0.02202	0.588749						polysaccharide catabolic process	0.01531	0.401476		microbody	0.04917	1		energy derivation by oxidation of organic compounds	0.02868	0.742934		alcohol catabolic process	0.01114	0.280186		positive regulation of histone modification	0.01547	0.375285		heterocycle metabolic process	0.00819	0.162666		urate transmembrane transporter activity	0.02618	0.653401		protein import	0.02353	0.625909
phosphatidylinositol trisphosphate phosphatase activity	0.02202	0.588749						aldehyde dehydrogenase [NAD(P)+] activity	0.01541	0.401476		neuron part	0.04973	1		helicase activity	0.02896	0.742934		organelle fission	0.01147	0.283528		nucleic acid metabolic process	0.01549	0.375285		thioredoxin peroxidase activity	0.00846	0.166846		galactoside binding	0.02618	0.653401		negative regulation of mitotic cell cycle	0.02366	0.628124
cellular respiration	0.02205	0.588749						mitotic G2/M transition checkpoint	0.01564	0.402988						cation-transporting ATPase activity	0.02908	0.742934		anion binding	0.01147	0.283528		lipid metabolic process	0.0155	0.375285		SNARE binding	0.0085	0.166846		salt transmembrane transporter activity	0.02618	0.653401		thiolester hydrolase activity	0.02413	0.630635
serine hydrolase activity	0.02206	0.588749						acroblast	0.01572	0.402988						ATPase activity, coupled to transmembrane movement of ions	0.02908	0.742934		exoribonuclease activity, producing 5'-phosphomonoesters	0.01173	0.284695		cofactor binding	0.01559	0.375285		cellular localization	0.00871	0.166846		negative regulation of mRNA processing	0.02647	0.653401		mitotic G2/M transition checkpoint	0.02423	0.630635
regulation of deubiquitinase activity	0.0221	0.588749						intra-S DNA damage checkpoint	0.01626	0.414784						monocarboxylic acid biosynthetic process	0.03006	0.751278		exoribonuclease activity	0.01173	0.284695		pyrimidine-containing compound catabolic process	0.01579	0.375285		tricarboxylate secondary active transmembrane transporter activity	0.00878	0.166846		NAD binding	0.02671	0.653401		cellular response to nutrient levels	0.02427	0.630635
deubiquitinase activator activity	0.0221	0.588749						macromolecular complex	0.01628	0.414784						protein tag	0.03076	0.751278		ubiquitin ligase complex	0.01179	0.284695		hydrolase activity, acting on carbon-nitrogen (but not peptide) bonds	0.0159	0.375285		positive regulation of immune system process	0.00882	0.166846		nuclear heterochromatin	0.02692	0.653401		regulation of protein transport	0.02451	0.630635
CUG codon-amino acid adaptor activity	0.02298	0.608227						GPI anchor metabolic process	0.01642	0.416354						LUBAC complex	0.03076	0.751278		alpha-glucosidase activity	0.01191	0.285668		organelle membrane fusion	0.01604	0.375285		mRNA processing	0.00888	0.166846		peptide binding	0.02701	0.653401		RNA polyadenylation	0.02453	0.630635
cyclin-dependent protein serine/threonine kinase regulator activity	0.02359	0.623532						carboxylic acid metabolic process	0.01722	0.435024						DNA duplex unwinding	0.03077	0.751278		ecdysone receptor holocomplex	0.01231	0.29366		imaginal disc-derived male genitalia development	0.01621	0.375285		oxidoreductase activity, acting on peroxide as acceptor	0.00892	0.166846		intraciliary transport	0.02721	0.653401		lipid phosphorylation	0.02468	0.630635
monoubiquitinated protein deubiquitination	0.02472	0.62911						positive regulation of mitochondrial fusion	0.01799	0.444248						DNA geometric change	0.03077	0.751278		regulation of protein modification process	0.01257	0.297655		TFIIB-class transcription factor binding	0.01641	0.375285		peroxidase activity	0.00892	0.166846		copper ion homeostasis	0.02832	0.657323		negative regulation of axon extension	0.02496	0.630635
PR-DUB complex	0.02472	0.62911						1-phosphatidylinositol-3-phosphate 5-kinase activity	0.01808	0.444248						ribonucleoside metabolic process	0.03246	0.753239		iron ion binding	0.01311	0.309666		transcription initiation from RNA polymerase III promoter	0.01641	0.375285		transcription from RNA polymerase III promoter	0.00901	0.166846		hydrogen-exporting ATPase activity	0.02867	0.657323		nucleotide-sugar transmembrane transporter activity	0.02511	0.630635
monoubiquitinated histone deubiquitination	0.02472	0.62911						fatty acid beta-oxidation	0.01823	0.444248						mitochondrial proton-transporting ATP synthase complex, coupling factor F(o)	0.03269	0.753239		dioxygenase activity	0.01351	0.312724		carbohydrate homeostasis	0.01651	0.375285		reproduction	0.00905	0.166846		P granule organization	0.02876	0.657323		hemocyte proliferation	0.02531	0.630635
monoubiquitinated histone H2A deubiquitination	0.02472	0.62911						tRNA wobble base modification	0.01826	0.444248						proton-transporting ATP synthase complex, coupling factor F(o)	0.03269	0.753239		nuclear pore	0.01356	0.312724		positive regulation of nucleobase-containing compound transport	0.01653	0.375285		nucleobase-containing compound metabolic process	0.00905	0.166846		cation:cation antiporter activity	0.0293	0.657323		mitogen-activated protein kinase kinase kinase binding	0.02595	0.630635
regulation of oviposition	0.02612	0.65607						tRNA wobble uridine modification	0.01826	0.444248						RNA helicase activity	0.03323	0.753239		pore complex	0.01356	0.312724		regulation of RNA export from nucleus	0.01653	0.375285		organic cyclic compound metabolic process	0.00916	0.166983		transition metal ion binding	0.02947	0.657323		monosaccharide catabolic process	0.02628	0.630635
regulation of mRNA splicing, via spliceosome	0.02625	0.65607						catalytic activity	0.01858	0.449498						galactosyltransferase activity	0.0333	0.753239		regulation of histone H4 acetylation	0.0138	0.314982		positive regulation of RNA export from nucleus	0.01653	0.375285		syntaxin binding	0.00922	0.166983		monosaccharide metabolic process	0.02979	0.657323		glucose catabolic process	0.02628	0.630635
maintenance of polarity of follicular epithelium	0.02635	0.65607						xylulokinase activity	0.01878	0.454509						aerobic electron transport chain	0.03331	0.753239		protein methyltransferase activity	0.01384	0.314982		histone H4-K20 trimethylation	0.01678	0.375285		endosomal part	0.00926	0.166983		glycerol-3-phosphate dehydrogenase activity	0.02993	0.657323		hexose catabolic process	0.02628	0.630635
endopeptidase activity	0.02675	0.658484						proteolysis	0.01909	0.45873						integral component of mitochondrial membrane	0.03351	0.753239		oxidoreductase activity, acting on the CH-OH group of donors, quinone or similar compound as acceptor	0.01422	0.317657		alcohol metabolic process	0.01683	0.375285		positive regulation of innate immune response	0.00931	0.166983		oxidoreductase activity, acting on the CH-OH group of donors, quinone or similar compound as acceptor	0.02993	0.657323		Golgi organization	0.02675	0.630635
iron ion binding	0.02675	0.658484						regulation of cell proliferation involved in compound eye morphogenesis	0.0194	0.45873						meiotic nuclear division	0.03361	0.753239		glycerol-3-phosphate dehydrogenase activity	0.01422	0.317657		regulation of retrograde axon cargo transport	0.01692	0.375285		octanoyltransferase activity	0.00934	0.166983		triglyceride lipase activity	0.02997	0.657323		glucosidase activity	0.02694	0.630635
ATPase dependent transmembrane transport complex	0.02742	0.673029						mitochondrial derivative	0.01958	0.45873						activation of Ral GTPase activity	0.03369	0.753239		protein-DNA complex assembly	0.01426	0.317657		positive regulation of retrograde axon cargo transport	0.01692	0.375285		RNA metabolic process	0.00942	0.168269		solute:cation antiporter activity	0.02998	0.657323		cellular response to arsenic-containing substance	0.02702	0.630635
FACT complex	0.02792	0.681416						chromosome, centromeric region	0.01979	0.45873						positive regulation of Ral GTPase activity	0.03369	0.753239		negative regulation of histone H3-K27 methylation	0.01454	0.319741		SUMO activating enzyme activity	0.01724	0.375285		adenylyltransferase activity	0.00969	0.172685		mismatch repair	0.03023	0.657323		cellular response to metal ion	0.02702	0.630635
cellular metabolic process	0.0282	0.683921						negative regulation of cell cycle phase transition	0.01991	0.45873						regulation of Ral GTPase activity	0.03369	0.753239		extracellular space	0.01455	0.319741		SMT3-dependent protein catabolic process	0.01724	0.375285		peptidyl-lysine dimethylation	0.00973	0.172685		single-organism carbohydrate metabolic process	0.03029	0.657323		cellular response to cadmium ion	0.02702	0.630635
regulation of cell adhesion	0.02913	0.685314						negative regulation of mitotic cell cycle phase transition	0.01991	0.45873						ATP synthesis coupled proton transport	0.03404	0.753239		regulation of meiosis	0.01536	0.333861		positive regulation of chromosome organization	0.01724	0.375285		generation of neurons	0.00984	0.172685		autophagic vacuole fusion	0.03083	0.657323		organellar small ribosomal subunit	0.02714	0.630635
beta-1,4-mannosyltransferase activity	0.02934	0.685314						acetylglucosaminyltransferase activity	0.01998	0.45873						energy coupled proton transport, down electrochemical gradient	0.03404	0.753239		histone binding	0.01545	0.333861		SUMO activating enzyme complex	0.01724	0.375285		2-hydroxyacylsphingosine 1-beta-galactosyltransferase activity	0.00987	0.172685		extracellular space	0.03106	0.657323		mitochondrial small ribosomal subunit	0.02714	0.630635
citrate metabolic process	0.02948	0.685314						DNA alkylation	0.02023	0.45873						hydrogen-exporting ATPase activity, phosphorylative mechanism	0.03463	0.762965		cellular catabolic process	0.01556	0.333861		positive regulation of NF-kappaB transcription factor activity	0.01724	0.375285		protein complex	0.00999	0.172685		deoxyribonucleoside monophosphate biosynthetic process	0.03128	0.657323		coenzyme metabolic process	0.02718	0.630635
regulation of RNA splicing	0.0295	0.685314						DNA methylation	0.02023	0.45873						cell cycle G2/M phase transition	0.03504	0.769815		methyltransferase activity	0.01558	0.333861		centromeric heterochromatin	0.01765	0.381222		response to hydrogen peroxide	0.01002	0.172685		deoxyribonucleoside monophosphate metabolic process	0.03128	0.657323		catabolic process	0.02725	0.630635
ATPase activity, coupled to transmembrane movement of substances	0.02951	0.685314						DNA methylation or demethylation	0.02023	0.45873						protein localization to plasma membrane	0.03559	0.777092		response to organonitrogen compound	0.01565	0.333861		female meiosis	0.01776	0.381222		epidermis development	0.01019	0.174697		pyrimidine deoxyribonucleoside monophosphate biosynthetic process	0.03128	0.657323		sodium:potassium:chloride symporter activity	0.02756	0.630635
ATPase activity, coupled to movement of substances	0.02951	0.685314						phosphorylase activity	0.02026	0.45873						mitotic cell cycle phase transition	0.03663	0.793		multicellular organism reproduction	0.01575	0.333861		vitamin transporter activity	0.01777	0.381222		carboxylic acid metabolic process	0.01029	0.176339		pyrimidine deoxyribonucleoside monophosphate metabolic process	0.03128	0.657323		mitochondrial crista	0.02769	0.630635
negative regulation of cell projection organization	0.02961	0.685314						chromatin organization	0.02078	0.467104						ATP biosynthetic process	0.03713	0.793039		I band	0.01592	0.334907		regulation of intracellular transport	0.01779	0.381222		cellular aromatic compound metabolic process	0.01057	0.179247		C-acyltransferase activity	0.03133	0.657323		cellular response to inorganic substance	0.02771	0.630635
primary metabolic process	0.0303	0.699512						peptidase activity, acting on L-amino acid peptides	0.02095	0.468491						glutathione transferase activity	0.03768	0.793039		D-amino acid metabolic process	0.01651	0.335669		regulation of myosin-light-chain-phosphatase activity	0.01843	0.391109		mitosis	0.0106	0.179247		translocon complex	0.03157	0.657323		cellular response to extracellular stimulus	0.02773	0.630635
dendrite regeneration	0.03081	0.699512						acyl-CoA dehydrogenase activity	0.02149	0.475973						purine ribonucleoside triphosphate biosynthetic process	0.03801	0.793039		D-amino acid catabolic process	0.01651	0.335669		negative regulation of myosin-light-chain-phosphatase activity	0.01843	0.391109		O-acetyltransferase activity	0.01097	0.184588		Sec61 translocon complex	0.03157	0.657323		catalytic activity	0.02796	0.630635
regulation of axon regeneration	0.03081	0.699512						chromatin silencing complex	0.0217	0.478831						purine nucleoside triphosphate biosynthetic process	0.03801	0.793039		glucose dehydrogenase activity	0.01661	0.335669		chromatin silencing at centromere	0.01859	0.392651		oocyte microtubule cytoskeleton polarization	0.01106	0.185025		response to acid	0.03194	0.66113		tryptophan 2,3-dioxygenase activity	0.02841	0.637602
regulation of neuron projection regeneration	0.03081	0.699512						negative regulation of response to gamma radiation	0.02237	0.483353						nucleoside metabolic process	0.03809	0.793039		ubiquitin-dependent protein catabolic process	0.01669	0.335669		ubiquitin-protein ligase activity	0.01899	0.399375		cell cycle process	0.01114	0.18545		S-malonyltransferase activity	0.03261	0.665243		regulation of establishment of protein localization	0.02896	0.646032
regulation of multicellular organism growth	0.0314	0.704116						regulation of response to gamma radiation	0.02237	0.483353						ribonucleoside triphosphate biosynthetic process	0.0396	0.804059		DNA replication	0.01702	0.335669		cyclin-dependent protein kinase activity	0.0193	0.399375		RNA binding	0.01138	0.18699		malonyltransferase activity	0.03261	0.665243		mitotic spindle pole	0.02975	0.658635
translesion synthesis	0.0317	0.704116						DNA modification	0.02244	0.483353						nucleoside triphosphate biosynthetic process	0.0396	0.804059		phosphofructokinase activity	0.01738	0.335669		cyclin-dependent protein serine/threonine kinase activity	0.0193	0.399375		polynucleotide adenylyltransferase activity	0.01144	0.18699		[acyl-carrier-protein] S-malonyltransferase activity	0.03261	0.665243		mitotic cell cycle checkpoint	0.02993	0.658635
hydrolase activity, acting on acid anhydrides, catalyzing transmembrane movement of substances	0.03178	0.704116						protein N-acetylglucosaminyltransferase complex	0.0227	0.484356						mitochondrial membrane	0.03972	0.804059		sulfate transport	0.01757	0.335669		lipase activity	0.01958	0.399375		response to fungus	0.01145	0.18699		hexose metabolic process	0.03349	0.666018		protein tyrosine kinase activity	0.02996	0.658635
regulation of mRNA processing	0.0325	0.704116						DNA N-glycosylase activity	0.02286	0.484356						glutathione metabolic process	0.04036	0.804059		sulfate transmembrane transporter activity	0.01757	0.335669		regulation of NFAT protein import into nucleus	0.01981	0.399375		DNA metabolic process	0.01153	0.187051		ubiquitin-dependent protein catabolic process	0.03391	0.666018		protein C-terminal S-isoprenylcysteine carboxyl O-methyltransferase activity	0.03047	0.658635
digestive tract mesoderm development	0.03259	0.704116						hydrolase activity, hydrolyzing N-glycosyl compounds	0.02286	0.484356						glycosyl compound metabolic process	0.04045	0.804059		reduced folate carrier activity	0.01761	0.335669		positive regulation of NFAT protein import into nucleus	0.01981	0.399375		vesicle-mediated transport	0.01176	0.188043		sensory perception of chemical stimulus	0.034	0.666018		C-terminal protein methylation	0.03047	0.658635
purine nucleoside monophosphate metabolic process	0.03263	0.704116						phosphatidylinositol N-acetylglucosaminyltransferase activity	0.02314	0.486897						nuclear pore outer ring	0.04093	0.804059		pseudouridylate synthase activity	0.01762	0.335669		ethanolamine-containing compound metabolic process	0.02004	0.399375		histone deacetylase activity	0.0118	0.188043		triglyceride metabolic process	0.03424	0.666018		protein C-terminal carboxyl O-methyltransferase activity	0.03047	0.658635
purine ribonucleoside monophosphate metabolic process	0.03263	0.704116						regulation of gene silencing	0.02374	0.491647						beta-N-acetylglucosaminidase activity	0.04097	0.804059		negative regulation of protein modification process	0.01766	0.335669		female meiosis chromosome segregation	0.02021	0.399375		protein deacetylase activity	0.0118	0.188043		neutral lipid metabolic process	0.03455	0.666018		cellular protein metabolic process	0.0314	0.658635
phosphatidylinositol bisphosphate phosphatase activity	0.03276	0.704116						histone lysine methylation	0.02376	0.491647						spermatid nucleus differentiation	0.04156	0.804059		glycerol-3-phosphate metabolic process	0.01766	0.335669		organic substance metabolic process	0.02025	0.399375		oxidoreductase activity, acting on the aldehyde or oxo group of donors, NAD or NADP as acceptor	0.01187	0.188523		acylglycerol metabolic process	0.03455	0.666018		pyridoxamine-phosphate oxidase activity	0.03152	0.658635
heme binding	0.03314	0.707366						osmosensor activity	0.02382	0.491647						mitochondrial electron transport, cytochrome c to oxygen	0.04161	0.804059		lysine N-methyltransferase activity	0.01768	0.335669		negative regulation of cellular response to hypoxia	0.02033	0.399375		phosphatase regulator activity	0.01202	0.189588		translation termination factor activity	0.03471	0.666018		NAD-dependent histone deacetylase activity	0.03155	0.658635
high mobility group box 1 binding	0.03336	0.707774						regulation of response to osmotic stress	0.02382	0.491647						succinate-CoA ligase activity	0.04173	0.804059		protein-lysine N-methyltransferase activity	0.01768	0.335669		small ribosomal subunit	0.02042	0.399375		cellular response to ionizing radiation	0.01207	0.189588		translation release factor activity	0.03471	0.666018		NAD-dependent protein deacetylase activity	0.03155	0.658635
tetrapyrrole binding	0.03391	0.713779						fucose binding	0.02437	0.497423						ATP metabolic process	0.04379	0.833062		histone-lysine N-methyltransferase activity	0.01768	0.335669		sphingomyelin catabolic process	0.02045	0.399375		mitotic sister chromatid cohesion	0.01226	0.191153		autophagic vacuole maturation	0.03487	0.666018		acyl-CoA hydrolase activity	0.03156	0.658635
regulation of striated muscle tissue development	0.03472	0.719908						mitochondrial electron transport, NADH to ubiquinone	0.02449	0.497423						proton-transporting two-sector ATPase complex, proton-transporting domain	0.04386	0.833062		catabolic process	0.01769	0.335669		thiamine pyrophosphate binding	0.02088	0.399375		coated pit	0.01255	0.194535		glycosylphosphatidylinositol diacylglycerol-lyase activity	0.03513	0.666018		anatomical structure maturation	0.03179	0.658635
regulation of muscle tissue development	0.03472	0.719908						negative regulation of cell cycle process	0.02454	0.497423						peptide metabolic process	0.0447	0.844615		cellular biogenic amine catabolic process	0.01787	0.335669		NAD-dependent histone deacetylase activity	0.02097	0.399375		DNA integrity checkpoint	0.01267	0.195522		sex determination	0.03514	0.666018		nerve maturation	0.03179	0.658635
regulation of cellular component movement	0.03565	0.729029						serine-type peptidase activity	0.02473	0.50003						sodium-dependent multivitamin transmembrane transporter activity	0.04511	0.848614		amine catabolic process	0.01787	0.335669		NAD-dependent protein deacetylase activity	0.02097	0.399375		translation initiation factor activity	0.01288	0.197573		PCNA complex	0.0352	0.666018		establishment of mitotic spindle orientation	0.03244	0.658635
regulation of cell-matrix adhesion	0.03565	0.729029						serine hydrolase activity	0.02521	0.508394						mitochondrial ATP synthesis coupled proton transport	0.04559	0.851129		sphingomyelin metabolic process	0.01801	0.335669		organonitrogen compound catabolic process	0.021	0.399375		positive regulation of defense response	0.013	0.198646		DNA polymerase processivity factor activity	0.0352	0.666018		tyrosine phosphorylation of STAT protein	0.03257	0.658635
primary active transmembrane transporter activity	0.03645	0.738145						cellular protein localization	0.02548	0.511226						glutathione peroxidase activity	0.04598	0.851393		nuclear division	0.01804	0.335669		carbohydrate metabolic process	0.02122	0.399375		double-strand break repair via nonhomologous end joining	0.01316	0.200033		DNA polymerase processivity factor complex	0.0352	0.666018		STAT protein import into nucleus	0.03257	0.658635
P-P-bond-hydrolysis-driven transmembrane transporter activity	0.03645	0.738145						nucleic acid binding	0.02582	0.513965						larval midgut cell programmed cell death	0.04624	0.853454		modification-dependent protein catabolic process	0.01821	0.335669		modification-dependent protein catabolic process	0.02131	0.399375		late endosome membrane	0.01327	0.200324		acireductone synthase activity	0.03614	0.668344		cellular defense response	0.03257	0.658635
uridine kinase activity	0.03893	0.781859						double-stranded RNA binding	0.02612	0.515542						exocyst	0.04665	0.853454		modification-dependent macromolecule catabolic process	0.01821	0.335669		modification-dependent macromolecule catabolic process	0.02131	0.399375		endosomal transport	0.01357	0.203242		signal sequence binding	0.03623	0.668344		regulation of cell cycle process	0.03259	0.658635
regulation of biosynthetic process of antibacterial peptides active against Gram-negative bacteria	0.04045	0.809581						histone methyltransferase activity (H3-K9 specific)	0.0264	0.515542						purine nucleoside biosynthetic process	0.04731	0.853454		negative regulation of histone H4-K20 methylation	0.01835	0.335669		glycerophospholipid biosynthetic process	0.02134	0.399375		oocyte differentiation	0.01366	0.203424		karyogamy	0.03624	0.668344		ion binding	0.03279	0.658635
cellular macromolecule metabolic process	0.04098	0.815035						fatty acid oxidation	0.02648	0.515542						purine ribonucleoside biosynthetic process	0.04731	0.853454		oxidoreductase activity, acting on paired donors, with incorporation or reduction of molecular oxygen, 2-oxoglutarate as one donor, and incorporation of one atom each of oxygen into both donors	0.01854	0.335669		positive regulation of chromatin assembly or disassembly	0.02149	0.399375		signal peptidase complex	0.01373	0.203424		pronuclear fusion	0.03624	0.668344		regulation of protein localization	0.03281	0.658635
ribosome binding	0.04112	0.815035						juvenile hormone response element binding	0.02663	0.515542						photoreceptor cell morphogenesis	0.04742	0.853454		cytoplasmic exosome (RNase complex)	0.01856	0.335669		positive regulation of heterochromatin assembly	0.02149	0.399375		defense response to fungus	0.01386	0.203697		regulation of DNA-dependent DNA replication	0.03674	0.668344		structural constituent of peritrophic membrane	0.033	0.658635
ribonucleoside monophosphate metabolic process	0.04148	0.817852						peptidase activity	0.02686	0.517206						potassium:amino acid symporter activity	0.04863	0.860758		reproduction	0.01864	0.335669		rDNA binding	0.02167	0.399375		intralumenal vesicle formation	0.01389	0.203697		proteolysis involved in cellular protein catabolic process	0.03697	0.668344		glucose metabolic process	0.03376	0.658635
nucleoside monophosphate metabolic process	0.04204	0.818195						mRNA export from nucleus	0.02693	0.517206						potassium ion symporter activity	0.04863	0.860758		eye-antennal disc development	0.019	0.335669		autophagic vacuole membrane	0.02212	0.399375		chitin-based cuticle development	0.01397	0.203697		maintenance of epithelial cell apical/basal polarity	0.03715	0.668344		cellular protein modification process	0.03379	0.658635
regulation of DNA replication	0.04207	0.818195						protein processing	0.02712	0.517701						purine nucleoside monophosphate biosynthetic process	0.049	0.860758		detection of pheromone	0.01906	0.335669		endoplasmic reticulum-Golgi intermediate compartment organization	0.02212	0.399375		cellular modified amino acid biosynthetic process	0.01402	0.203697		asparaginyl-tRNA aminoacylation	0.03716	0.668344		protein modification process	0.03379	0.658635
rough endoplasmic reticulum	0.0424	0.818964						transferase activity, transferring hexosyl groups	0.02767	0.524364						purine ribonucleoside monophosphate biosynthetic process	0.049	0.860758		immune response-regulating cell surface receptor signaling pathway	0.01913	0.335669		DNA metabolic process	0.02273	0.399375		cellular biosynthetic process	0.01412	0.203977		asparagine-tRNA ligase activity	0.03716	0.668344		regulation of histone modification	0.03407	0.658635
positive regulation of photoreceptor cell differentiation	0.04343	0.818964						protein methyltransferase activity	0.02842	0.53065						ribonucleoprotein complex binding	0.04966	0.866487		immune response-activating cell surface receptor signaling pathway	0.01913	0.335669		acid-amino acid ligase activity	0.02294	0.399375		pyrimidine nucleobase catabolic process	0.01425	0.205685		lytic vacuole	0.03735	0.668344		receptor signaling protein activity	0.0343	0.658635
carboxylic ester hydrolase activity	0.04368	0.818964						N-methyltransferase activity	0.0285	0.53065										peptidyl-serine modification	0.01925	0.335669		coenzyme binding	0.02308	0.399375		SCF ubiquitin ligase complex	0.01431	0.205685		lysosome	0.03735	0.668344		ER to Golgi vesicle-mediated transport	0.03453	0.658635
protein kinase regulator activity	0.04378	0.818964						aging	0.02851	0.53065										peptidyl-serine phosphorylation	0.01925	0.335669		small conjugating protein ligase activity	0.02312	0.399375		multicellular organism reproduction	0.01438	0.206053		ion homeostasis	0.03736	0.668344		protein carboxyl O-methyltransferase activity	0.03506	0.658635
Golgi transport complex	0.04385	0.818964						cell part	0.02867	0.53065										alditol phosphate metabolic process	0.01958	0.338276		D-xylose metabolic process	0.02321	0.399375		regulation of innate immune response	0.01453	0.207902		cation homeostasis	0.0381	0.668344		carboxyl-O-methyltransferase activity	0.03506	0.658635
ATP citrate synthase activity	0.04387	0.818964						positive regulation of gene expression, epigenetic	0.02943	0.536966										transferase activity	0.01962	0.338276		xylosyltransferase activity	0.02321	0.399375		small-subunit processome	0.01475	0.209418		fatty acid binding	0.03844	0.668344		pyridine-containing compound metabolic process	0.03531	0.658635
regulation of cell junction assembly	0.04464	0.818964						protein maturation	0.02955	0.536966										Ras GTPase binding	0.02014	0.343739		UDP-xylosyltransferase activity	0.02321	0.399375		DNA packaging	0.01523	0.215008		monocarboxylic acid binding	0.03844	0.668344		phosphate-containing compound metabolic process	0.03536	0.658635
alanine-tRNA ligase activity	0.04503	0.818964						glycolipid biosynthetic process	0.0297	0.536966										nuclear ubiquitin ligase complex	0.02021	0.343739		chondroitin sulfate proteoglycan biosynthetic process	0.02321	0.399375		DNA recombination	0.01524	0.215008		nuclear lamina	0.03852	0.668344		cell cycle checkpoint	0.03554	0.658635
alanyl-tRNA aminoacylation	0.04503	0.818964						fatty acid catabolic process	0.02996	0.537537										macromolecular complex assembly	0.02124	0.359749		chondroitin sulfate proteoglycan metabolic process	0.02321	0.399375		proteinaceous extracellular matrix	0.01527	0.215008		modification-dependent protein catabolic process	0.0386	0.668344		mitotic DNA damage checkpoint	0.03567	0.658635
regulation of neuron differentiation	0.04525	0.818964						RNA export from nucleus	0.03007	0.537537										spliceosomal complex assembly	0.02131	0.359749		protein xylosyltransferase activity	0.02321	0.399375		maintenance of RNA location	0.0154	0.215008		modification-dependent macromolecule catabolic process	0.0386	0.668344		rDNA binding	0.0357	0.658635
regulation of photoreceptor cell differentiation	0.04554	0.818964						eukaryotic translation initiation factor 2B complex	0.03103	0.543764										Rab GTPase binding	0.02168	0.36299		transcription initiation from RNA polymerase II promoter	0.02323	0.399375		chromosome condensation	0.0155	0.215008		regulation of DNA metabolic process	0.03861	0.668344		oxidoreduction coenzyme metabolic process	0.03573	0.658635
phosphoenolpyruvate carboxykinase activity	0.04592	0.818964						dolichyl-diphosphooligosaccharide-protein glycotransferase activity	0.03112	0.543764										peptide-N4-(N-acetyl-beta-glucosaminyl)asparagine amidase activity	0.02171	0.36299		hydrolase activity	0.02332	0.399375		cell maturation	0.01554	0.215008		detection of chemical stimulus involved in sensory perception of smell	0.03893	0.671535		uroporphyrinogen-III synthase activity	0.03592	0.658635
phosphoenolpyruvate carboxykinase (GTP) activity	0.04592	0.818964						histone methylation	0.03149	0.543764										glycoprotein catabolic process	0.02171	0.36299		maintenance of protein location	0.0235	0.399375		establishment of localization	0.01569	0.215905		peptidase activator activity involved in apoptotic process	0.03926	0.676627		sensory perception	0.03635	0.658635
calcium-dependent cell-cell adhesion	0.04609	0.818964						ribonuclease III activity	0.03176	0.543764										small GTPase binding	0.02212	0.368834		chondroitin sulfate biosynthetic process	0.02351	0.399375		cellular response to abiotic stimulus	0.01575	0.216215		glucosamine-containing compound catabolic process	0.0399	0.678533		carbon-oxygen lyase activity, acting on phosphates	0.03652	0.658635
hemopoiesis	0.04637	0.818964						double-stranded RNA-specific ribonuclease activity	0.03176	0.543764										fusion cell fate specification	0.02235	0.37149		chondroitin sulfate metabolic process	0.02351	0.399375		helicase activity	0.01582	0.216293		amino sugar catabolic process	0.0399	0.678533		6-pyruvoyltetrahydropterin synthase activity	0.03652	0.658635
nucleosome binding	0.04637	0.818964						THO complex	0.03191	0.543764										endosome organization	0.02252	0.373023		sphingomyelin metabolic process	0.02357	0.399375		determination of dorsal/ventral asymmetry	0.01615	0.220379		chitin catabolic process	0.0399	0.678533		axon ensheathment	0.03653	0.658635
cell-cell junction	0.04697	0.818964						chromatin remodeling	0.03193	0.543764										response to acid	0.02305	0.377416		mitotic anaphase-promoting complex activity	0.02358	0.399375		vesicle organization	0.01617	0.220379		tRNA (guanine) methyltransferase activity	0.04073	0.690111		ensheathment of neurons	0.03653	0.658635
tricarboxylic acid metabolic process	0.04718	0.818964						meiotic DNA double-strand break processing	0.03286	0.543764										hydrolase activity, acting on ester bonds	0.02312	0.377416			0.02359	0.399375		reactive oxygen species metabolic process	0.01631	0.220561		amide binding	0.0409	0.690111		single-organism carbohydrate catabolic process	0.03664	0.658635
inositol phosphate dephosphorylation	0.04771	0.818964						DNA double-strand break processing	0.03286	0.543764										histone H4-K20 dimethylation	0.02344	0.379159		engulfment of apoptotic cell	0.02393	0.399375		cellular macromolecular complex assembly	0.01632	0.220561		single-organism metabolic process	0.04192	0.704272		UDP-glucose transmembrane transporter activity	0.03682	0.658635
phosphorylated carbohydrate dephosphorylation	0.04771	0.818964						mitochondrial fusion	0.03291	0.543764										positive regulation of histone H4-K20 methylation	0.02344	0.379159		ecdysteroid 22-hydroxylase activity	0.02408	0.399375		vesicle tethering involved in exocytosis	0.01652	0.222		lipoprotein metabolic process	0.04258	0.711091		UDP-glucuronic acid transmembrane transporter activity	0.03682	0.658635
inositol phosphate catabolic process	0.04771	0.818964						mannose binding	0.03308	0.543764										mitochondrial pyruvate transport	0.02363	0.379159		solute:sodium symporter activity	0.02413	0.399375		instar larval development	0.01676	0.224286		carbohydrate binding	0.04321	0.716458		UDP-glucuronic acid transport	0.03682	0.658635
catalytic activity	0.04855	0.818964						transcription from RNA polymerase II promoter	0.03315	0.543764										positive regulation of feeding behavior	0.02381	0.379159		meiotic chromosome segregation	0.02423	0.399375		purine NTP-dependent helicase activity	0.01709	0.226582		aspartyl-tRNA aminoacylation	0.04393	0.717836		UDP-glucose transport	0.03682	0.658635
structural constituent of pupal chitin-based cuticle	0.04889	0.818964						monocarboxylic acid catabolic process	0.03323	0.543764										organonitrogen compound catabolic process	0.02383	0.379159		cyclin catabolic process	0.02451	0.399375		ATP-dependent helicase activity	0.01709	0.226582		aspartate-tRNA ligase activity	0.04393	0.717836		peptide amidation	0.03687	0.658635
ATPase activity, coupled to transmembrane movement of ions, phosphorylative mechanism	0.04903	0.818964						oligosaccharyltransferase complex	0.03327	0.543764										biotin carboxylase activity	0.02395	0.379159		phosphatidylinositol phospholipase C activity	0.02462	0.399375		organelle membrane	0.01728	0.227867		nuclear export	0.04409	0.717836		peptide modification	0.03687	0.658635
disaccharide biosynthetic process	0.0492	0.818964						mitochondrial DNA metabolic process	0.03328	0.543764										proteolysis involved in cellular protein catabolic process	0.02397	0.379159		phospholipase C activity	0.02462	0.399375		glycolytic process	0.01764	0.228794		metabolic process	0.04442	0.717836		cofactor metabolic process	0.03706	0.659554
trehalose biosynthetic process	0.0492	0.818964						mitochondrial DNA replication	0.03328	0.543764										cuticle chitin metabolic process	0.0242	0.379159		glycerone-phosphate O-acyltransferase activity	0.02468	0.399375		intracellular protein transmembrane transport	0.01768	0.228794		pseudouridine synthesis	0.0451	0.717836		fatty acid elongation, unsaturated fatty acid	0.03764	0.660317
R7 cell development	0.04932	0.818964						chromosome passenger complex	0.03328	0.543764										sugar-phosphatase activity	0.02446	0.379159		gamma-aminobutyric acid catabolic process	0.02477	0.399375		protein transmembrane transport	0.01768	0.228794		alanine biosynthetic process	0.04562	0.717836		response to arsenic-containing substance	0.03783	0.660317
maternal determination of anterior/posterior axis, embryo	0.04936	0.818964						negative regulation of immune system process	0.03351	0.544479										RCAF complex	0.02451	0.379159		succinate-semialdehyde dehydrogenase [NAD(P)+] activity	0.02477	0.399375		regulation of defense response	0.01772	0.228794		alanine metabolic process	0.04562	0.717836		phosphatidylinositol phosphorylation	0.03788	0.660317
regulation of locomotion	0.04942	0.818964						macromolecule catabolic process	0.03379	0.545417										carbon-nitrogen ligase activity, with glutamine as amido-N-donor	0.02455	0.379159		succinate-semialdehyde dehydrogenase (NAD+) activity	0.02477	0.399375		RNA 7-methylguanosine cap binding	0.01777	0.228794		pyruvate family amino acid biosynthetic process	0.04562	0.717836		cellular response to cold	0.03794	0.660317
succinate-CoA ligase (ADP-forming) activity	0.04972	0.818964						flavin adenine dinucleotide binding	0.03388	0.545417										pronuclear fusion	0.02455	0.379159		proteolysis involved in cellular protein catabolic process	0.02487	0.399375		clathrin coat	0.01807	0.231529		pyruvate family amino acid metabolic process	0.04562	0.717836		7SK snRNA binding	0.03807	0.660317
negative regulation of cellular catabolic process	0.04987	0.818964						Bolwig's organ morphogenesis	0.03412	0.546117										karyogamy	0.02455	0.379159		transcription factor complex	0.02488	0.399375		ecdysteroid biosynthetic process	0.0181	0.231529		cysteine desulfurase activity	0.04562	0.717836		lamellipodium organization	0.03847	0.660317
								ribonuclease activity	0.03453	0.551758										xenobiotic-transporting ATPase activity	0.02472	0.379159		response to hydroperoxide	0.02492	0.399375		antioxidant activity	0.01815	0.231529		cysteine-type endopeptidase activity	0.0461	0.717836		lamellipodium assembly	0.03847	0.660317
								cellular macromolecule catabolic process	0.0349	0.552308										xenobiotic transporter activity	0.02472	0.379159		response to lipid hydroperoxide	0.02492	0.399375		mRNA polyadenylation	0.01885	0.240198		eggshell chorion gene amplification	0.04618	0.717836		copper chaperone activity	0.03863	0.660317
								protein localization to organelle	0.0354	0.556652										exonuclease activity, active with either ribo- or deoxyribonucleic acids and producing 5'-phosphomonoesters	0.02503	0.379159		protein polyubiquitination	0.02499	0.399375		single-organism membrane organization	0.01893	0.240333		glucose transmembrane transporter activity	0.04621	0.717836		actomyosin contractile ring localization	0.03886	0.660317
								histone H3-K9 methylation	0.03566	0.556652										negative regulation of sequence-specific DNA binding transcription factor activity	0.02504	0.379159		SNARE binding	0.02539	0.399375		maintenance of pole plasm mRNA location	0.01902	0.240691		Cul2-RING ubiquitin ligase complex	0.04636	0.717836		contractile ring localization	0.03886	0.660317
								fumarate hydratase activity	0.03606	0.556652										macromolecule catabolic process	0.0251	0.379159		ACP phosphopantetheine attachment site binding involved in fatty acid biosynthetic process	0.02553	0.399375		cellular carbohydrate catabolic process	0.01916	0.242016		regulation of NFAT protein import into nucleus	0.0464	0.717836		benzodiazepine receptor activity	0.03919	0.663088
								Golgi transport complex	0.03639	0.556652										1-alkyl-2-acetylglycerophosphocholine esterase activity	0.0252	0.379159		prosthetic group binding	0.02553	0.399375		UUA codon-amino acid adaptor activity	0.01928	0.242177		positive regulation of NFAT protein import into nucleus	0.0464	0.717836		mitochondrial part	0.03955	0.668451
								lipid oxidation	0.03641	0.556652										protein catabolic process	0.02524	0.379159		phosphopantetheine binding	0.02553	0.399375		mRNA metabolic process	0.01988	0.247986		hydrogen ion transmembrane transporter activity	0.04647	0.717836		pattern orientation	0.04006	0.668451
								regulation of protein ubiquitination	0.03643	0.556652										response to hydrogen peroxide	0.02548	0.381103		ACP phosphopantetheine attachment site binding	0.02553	0.399375		protein phosphatase regulator activity	0.01992	0.247986		regulation of transcription factor import into nucleus	0.04701	0.719175		response to cadmium ion	0.04023	0.668451
								organic acid metabolic process	0.03671	0.556652										SAP kinase activity	0.02597	0.387855		hydrolase activity, acting on acid carbon-carbon bonds	0.0257	0.399375		cuticle development	0.01999	0.247986		transferase activity, transferring acyl groups other than amino-acyl groups	0.04761	0.719175		adult walking behavior	0.04027	0.668451
								oxoacid metabolic process	0.03671	0.556652										cytoplasmic microtubule organization	0.02648	0.392366		hydrolase activity, acting on acid carbon-carbon bonds, in ketonic substances	0.0257	0.399375		cellular response to radiation	0.02008	0.247986		peptidylglycine monooxygenase activity	0.04795	0.719175		organ or tissue specific immune response	0.04058	0.668451
								regulation of mitochondrial fusion	0.03676	0.556652										double-stranded methylated DNA binding	0.02654	0.392366		fumarylacetoacetase activity	0.0257	0.399375		nucleocytoplasmic transport	0.02015	0.247986		IkappaB kinase complex	0.0481	0.719175		mucosal immune response	0.04058	0.668451
								negative regulation of transposition, RNA-mediated	0.03735	0.559168										ribonucleoprotein granule	0.02676	0.392398		response to heat	0.02574	0.399375		nuclear transport	0.02015	0.247986		IkappaB kinase activity	0.0481	0.719175		protein import into nucleus	0.04068	0.668451
								regulation of transposition, RNA-mediated	0.03735	0.559168										GTPase binding	0.0268	0.392398		solute:cation symporter activity	0.02617	0.405551		tRNA methyltransferase activity	0.02035	0.248552		monosaccharide catabolic process	0.04843	0.719175		single-organism nuclear import	0.04068	0.668451
								cytoplasmic transport	0.03847	0.559168										hydrolase activity, acting on acid anhydrides, in phosphorus-containing anhydrides	0.02693	0.392858		cyclin-dependent protein kinase 5 activator activity	0.02664	0.407972		protein transmembrane transporter activity	0.02041	0.248552		glucose catabolic process	0.04843	0.719175		phosphorus metabolic process	0.04106	0.668451
								nucleotide salvage	0.03872	0.559168										ATPase activity	0.02722	0.394321		isocitrate dehydrogenase (NADP+) activity	0.02709	0.407972		macromolecule transmembrane transporter activity	0.02041	0.248552		hexose catabolic process	0.04843	0.719175		mitotic DNA integrity checkpoint	0.04106	0.668451
								nicotinate-nucleotide diphosphorylase (carboxylating) activity	0.03872	0.559168										regulation of mitochondrial membrane potential	0.02805	0.404702		isocitrate metabolic process	0.02709	0.407972		single-organism transport	0.0206	0.250486		protein export from nucleus	0.04849	0.719175		dihydrouracil dehydrogenase (NAD+) activity	0.04122	0.668451
								nicotinate phosphoribosyltransferase activity	0.03872	0.559168										iron chaperone activity	0.02805	0.404702		glyoxylate cycle	0.02709	0.407972		instar larval or pupal development	0.0207	0.250486		hydrolase activity, acting on acid anhydrides, catalyzing transmembrane movement of substances	0.0487	0.719469		dihydropyrimidine dehydrogenase (NADP+) activity	0.04122	0.668451
								nicotinate nucleotide metabolic process	0.03872	0.559168										chaperonin-containing T-complex	0.02817	0.405081		pyrimidine nucleoside metabolic process	0.02712	0.407972		nucleic acid binding	0.02083	0.250486		mitotic metaphase	0.04923	0.721245		Mo-molybdopterin cofactor sulfurase activity	0.04139	0.669314
								pyridine nucleotide salvage	0.03872	0.559168										Ran GTPase binding	0.02834	0.40546		pyrimidine ribonucleoside metabolic process	0.02712	0.407972		1-pyrroline-5-carboxylate dehydrogenase activity	0.02086	0.250486		vacuolar proton-transporting V-type ATPase, V0 domain	0.04933	0.721245		kinetochore microtubule	0.04177	0.675359
								nicotinate nucleotide biosynthetic process	0.03872	0.559168										GCG codon-amino acid adaptor activity	0.02859	0.405709		cytolysis	0.02722	0.407972		eukaryotic initiation factor 4G binding	0.02102	0.250881		proton-transporting V-type ATPase, V0 domain	0.04933	0.721245		mediolateral intercalation	0.04204	0.675462
								nicotinate nucleotide salvage	0.03872	0.559168										chromosome condensation	0.02866	0.405709		JUN phosphorylation	0.0277	0.411885		aminoacylase activity	0.02118	0.252022		vacuole	0.04959	0.721245		nuclear import	0.04271	0.68347
								membrane lipid biosynthetic process	0.03881	0.559168										NAD+ binding	0.02877	0.405709		wound healing, spreading of epidermal cells	0.0277	0.411885		RNA cap binding	0.02146	0.254281		rRNA binding	0.04962	0.721245		macromolecule modification	0.04303	0.689477
								lipid modification	0.0403	0.57746										carbohydrate metabolic process	0.02878	0.405709		positive regulation of histone H4-K16 acetylation	0.02814	0.415848		grooming behavior	0.02148	0.254281		oxidoreductase activity, acting on paired donors, with incorporation or reduction of molecular oxygen	0.04992	0.723287		hydro-lyase activity	0.04356	0.696364
								cell aging	0.0408	0.58188										histone H3-K4 methylation	0.02936	0.410535		H2A histone acetyltransferase activity	0.02814	0.415848		histone H3-K4 demethylation	0.0216	0.255023						ecdysiostatic hormone activity	0.04379	0.696544
								mitochondrion morphogenesis	0.04224	0.599369										negative regulation of compound eye retinal cell apoptotic process	0.02939	0.410535		positive regulation of histone H4 acetylation	0.02814	0.415848		maintenance of neuroblast polarity	0.02178	0.256644						ubiquitin-dependent protein catabolic process	0.04392	0.696544
								endonuclease activity	0.04273	0.60523										MCM complex	0.02955	0.410535		TOR signaling	0.02901	0.426889		mitotic spindle elongation	0.02187	0.256834						establishment or maintenance of neuroblast polarity	0.04468	0.708459
								proteasome regulatory particle, base subcomplex	0.04347	0.612366										Seh1-associated complex	0.02984	0.410535		symporter activity	0.02921	0.426889		mitochondrial part	0.02203	0.257611						inositol monophosphate 1-phosphatase activity	0.04523	0.71443
								meiotic cytokinesis	0.04401	0.61581										uridine phosphorylase activity	0.03	0.410535		mitotic spindle elongation	0.02928	0.426889		RNA processing	0.02242	0.258272						inositol monophosphate phosphatase activity	0.04523	0.71443
								chromatin insulator sequence binding	0.0445	0.623968										cellular amine metabolic process	0.03033	0.410535		protein serine/threonine kinase activator activity	0.02935	0.426889		lipid particle organization	0.0225	0.258272						modification-dependent protein catabolic process	0.04569	0.718931
								histone methyltransferase activity (H3-K4 specific)	0.0455	0.633639										cellular biogenic amine metabolic process	0.03033	0.410535		isovaleryl-CoA dehydrogenase activity	0.02944	0.426889		non-membrane-bounded organelle	0.02253	0.258272						modification-dependent macromolecule catabolic process	0.04569	0.718931
								smooth muscle contraction	0.04641	0.639685										amine metabolic process	0.03033	0.410535		leucine catabolic process	0.02944	0.426889		intracellular non-membrane-bounded organelle	0.02253	0.258272						DNA integrity checkpoint	0.04619	0.723658
								glycolipid metabolic process	0.04678	0.640696										response to fructose	0.03036	0.410535		cullin-RING ubiquitin ligase complex	0.02946	0.426889		regulation of response to stress	0.02258	0.258272						brahma complex	0.04635	0.723658
								piRNA metabolic process	0.04806	0.651299										regulation of appetite	0.03036	0.410535		translational initiation	0.0299	0.43211		oocyte maturation	0.02263	0.258272						female genitalia morphogenesis	0.04701	0.726213
								regulation of cell cycle phase transition	0.04818	0.651299										cellular response to fructose stimulus	0.03036	0.410535		regulation of cellular localization	0.03001	0.43211		peroxiredoxin activity	0.02286	0.259543						imaginal disc-derived female genitalia morphogenesis	0.04701	0.726213
								regulation of mitotic cell cycle phase transition	0.04818	0.651299										cellular response to hexose stimulus	0.03036	0.410535		modified amino acid binding	0.0301	0.43211		neurogenesis	0.02311	0.260805						cellular response to external stimulus	0.04731	0.726213
								single-organism organelle organization	0.04837	0.651299										cellular response to monosaccharide stimulus	0.03036	0.410535		sphingomyelin phosphodiesterase activity	0.03012	0.43211		cellular response to hormone stimulus	0.02315	0.260805						positive regulation of histone H4-K16 acetylation	0.04771	0.726213
								single-organism membrane fusion	0.04864	0.651299										response to reactive oxygen species	0.0306	0.410535		regulation of chromatin assembly or disassembly	0.03023	0.432967		pyruvate metabolic process	0.0235	0.264352						H2A histone acetyltransferase activity	0.04771	0.726213
								heterochromatin organization involved in chromatin silencing	0.04908	0.651299										peptidyl-proline hydroxylation to 4-hydroxy-L-proline	0.03078	0.410535		determination of digestive tract left/right asymmetry	0.03037	0.434174		Sin3-type complex	0.02378	0.266207						positive regulation of histone H4 acetylation	0.04771	0.726213
								mitochondrial proton-transporting ATP synthase complex, coupling factor F(o)	0.04918	0.651299										peptidyl-proline hydroxylation	0.03078	0.410535		cellular lipid metabolic process	0.03052	0.434652		S-methyl-5-thioadenosine phosphorylase activity	0.02418	0.270398						mitotic DNA replication checkpoint	0.04781	0.726213
								proton-transporting ATP synthase complex, coupling factor F(o)	0.04918	0.651299										4-hydroxyproline metabolic process	0.03078	0.410535		proboscis development	0.0306	0.434652		gamma-glutamylcyclotransferase activity	0.0243	0.270996						positive regulation of transcription of Notch receptor target	0.04846	0.726213
								organelle membrane	0.04929	0.651299										gliogenesis	0.03085	0.410535		organic hydroxy compound metabolic process	0.03114	0.437151		structural constituent of ribosome	0.0247	0.273399						negative regulation of histone H4-K16 acetylation	0.04846	0.726213
								starch binding	0.04993	0.653277										3'-5' exonuclease activity	0.03111	0.41189		protein targeting to membrane	0.03122	0.437151		synaptonemal complex	0.02471	0.273399						negative regulation of histone H4 acetylation	0.04846	0.726213
								glycerophosphodiester phosphodiesterase activity	0.04993	0.653277										hydrolase activity, acting on acid anhydrides	0.03158	0.414853		SRP-dependent cotranslational protein targeting to membrane, signal sequence recognition	0.03123	0.437151		sulfur compound transmembrane transporter activity	0.02472	0.273399						protein N-linked glycosylation	0.04903	0.726213
																				glucuronosyltransferase activity	0.03174	0.414853		chromatin silencing	0.03153	0.44096		endodeoxyribonuclease activity, producing 5'-phosphomonoesters	0.02498	0.276164						phosphorylase kinase activity	0.04954	0.726213
																				response to nitrogen compound	0.03184	0.414853		negative regulation of gene expression, epigenetic	0.03209	0.443372		transferase complex	0.02532	0.276633						response to starvation	0.04964	0.726213
																				peptidyl-proline modification	0.03192	0.414853		monocarboxylic acid catabolic process	0.03228	0.443372		ribosomal subunit	0.02545	0.276633						nuclear pore transmembrane ring	0.04974	0.726213
																				intracellular copper ion transport	0.03219	0.415397		defense response to protozoan	0.03234	0.443372		macromolecular complex assembly	0.02561	0.276633						anion binding	0.04985	0.726213
																				superoxide dismutase copper chaperone activity	0.03219	0.415397		response to protozoan	0.03234	0.443372		organelle organization	0.02572	0.276633
																				negative regulation of chromosome organization	0.03255	0.416907		anaphase-promoting complex	0.03234	0.443372		gamma-aminobutyric acid metabolic process	0.02586	0.276633
																				phospholipase activity	0.03256	0.416907		carboxy-lyase activity	0.03242	0.443372		double-strand break repair	0.02589	0.276633
																				acylphosphatase activity	0.03343	0.428108		multi-organism cellular process	0.03269	0.443372		RNA polyadenylation	0.02593	0.276633
																				proximal/distal axis specification	0.03415	0.439179		HMG box domain binding	0.03298	0.443372		heparan sulfate proteoglycan metabolic process	0.02611	0.276633
																				ligase activity, forming carbon-carbon bonds	0.03445	0.442353		spindle elongation	0.033	0.443372		heparan sulfate proteoglycan biosynthetic process	0.02611	0.276633
																				cellular lipid catabolic process	0.03467	0.444013		oxalyl-CoA decarboxylase activity	0.03302	0.443372		response to water deprivation	0.02616	0.276633
																				sphingomyelin phosphodiesterase activity	0.03484	0.444674		protein heterooligomerization	0.03306	0.443372		cellular response to oxidative stress	0.02635	0.276633
																				cellular macromolecule catabolic process	0.03525	0.449583		peptidyl-lysine trimethylation	0.0332	0.443372		endoplasmic reticulum membrane	0.02641	0.276633
																				cellular response to oxygen-containing compound	0.03607	0.457915		Mon1-Ccz1 complex	0.03324	0.443372		salivary gland cell autophagic cell death	0.02646	0.276633
																				DNA packaging	0.03695	0.461923		ecdysone biosynthetic process	0.0337	0.450459		autophagic cell death	0.02646	0.276633
																				chromosome separation	0.03699	0.461923		spliceosomal complex	0.03387	0.451208		cytoplasmic vesicle	0.02647	0.276633
																				Golgi vesicle budding	0.03717	0.461923		alcohol biosynthetic process	0.03447	0.456792		response to UV	0.02652	0.276633
																				Rab guanyl-nucleotide exchange factor activity	0.03721	0.461923		protein sumoylation	0.03483	0.456792		positive regulation of cell cycle	0.02659	0.276633
																				regulation of Rab protein signal transduction	0.03721	0.461923		precatalytic spliceosome	0.0349	0.456792		pteridine-containing compound metabolic process	0.02663	0.276633
																				indole-containing compound catabolic process	0.03735	0.461923		sulfur compound binding	0.03493	0.456792		Golgi-associated vesicle	0.02671	0.276633
																				5S rRNA primary transcript binding	0.03742	0.461923		regulation of microtubule-based movement	0.03495	0.456792		signal peptide processing	0.02686	0.276633
																				monosaccharide metabolic process	0.0375	0.461923		positive regulation of decapentaplegic signaling pathway	0.03503	0.456792		negative regulation of autophagy	0.02686	0.276633
																				pyrokinin receptor activity	0.03758	0.461923		maintenance of protein location in cell	0.03507	0.456792		lipopolysaccharide biosynthetic process	0.02693	0.276633
																				chromatin organization	0.03759	0.461923		regulation of nucleocytoplasmic transport	0.0352	0.457527		lipopolysaccharide metabolic process	0.02693	0.276633
																				ATPase activity, coupled to movement of substances	0.0377	0.461923		autophagic vacuole maturation	0.03535	0.458043		alpha-amino acid biosynthetic process	0.02734	0.278797
																				ATPase activity, coupled to transmembrane movement of substances	0.0377	0.461923		sterol biosynthetic process	0.03561	0.45986		positive regulation of ion transport	0.02736	0.278797
																				fatty acid transport	0.0378	0.461923		RNA 7-methylguanosine cap binding	0.03603	0.462729		cellular amino acid metabolic process	0.02751	0.279606
																				enzyme binding	0.03794	0.461923		TORC2 complex	0.03605	0.462729		positive regulation of Wnt signaling pathway	0.02759	0.279831
																				extracellular phenylacetaldehyde-gated ion channel activity	0.03806	0.461923		positive regulation of protein import into nucleus	0.03627	0.462729		translational initiation	0.02771	0.280733
																				response to pheromone	0.03816	0.461923		positive regulation of transcription factor import into nucleus	0.03627	0.462729		microtubule organizing center	0.02821	0.282758
																				high affinity sulfate transmembrane transporter activity	0.03825	0.461923		phospholipid metabolic process	0.03663	0.466878		vesicle uncoating	0.02823	0.282758
																				primary metabolic process	0.03828	0.461923		translation initiation factor activity	0.03701	0.469938		synaptic vesicle uncoating	0.02823	0.282758
																				peptidyl-lysine dimethylation	0.03859	0.464715		ecdysone metabolic process	0.03712	0.469938		defense response to other organism	0.02843	0.282844
																				cytochrome complex assembly	0.03875	0.465447		ubiquitin activating enzyme activity	0.03718	0.469938		detection of chemical stimulus involved in sensory perception of smell	0.02853	0.282844
																				proteasome-mediated ubiquitin-dependent protein catabolic process	0.03885	0.46588		somatic ring canal	0.03738	0.472016		molting cycle	0.0286	0.282844
																				four-way junction DNA binding	0.03911	0.467116		myosin II light chain binding	0.03763	0.473711		molting cycle, chitin-based cuticle	0.0286	0.282844
																				RNA polymerase II transcription factor binding	0.03923	0.467116		positive transcription elongation factor complex b	0.03817	0.479643		protein processing	0.02881	0.283721
																				organophosphate catabolic process	0.03924	0.467116		Rap protein signal transduction	0.03825	0.479643		cellular protein complex disassembly	0.02899	0.283721
																				protein-DNA complex subunit organization	0.03971	0.470038		UBC13-UEV1A complex	0.03896	0.483492		protein complex disassembly	0.02899	0.283721
																				pyruvate transport	0.03991	0.470421		ubiquitin conjugating enzyme complex	0.03896	0.483492		carnitine O-acetyltransferase activity	0.02925	0.283721
																				protein trans-autophosphorylation	0.04081	0.481502		RNA polymerase II transcription corepressor activity	0.03916	0.48435		SRP-dependent cotranslational protein targeting to membrane, translocation	0.02926	0.283721
																				diphosphomevalonate decarboxylase activity	0.0415	0.484309		alpha-amino acid catabolic process	0.03924	0.48435		recycling endosome	0.02927	0.283721
																				regulation of GTP catabolic process	0.04151	0.484309		parallel actin filament bundle assembly	0.03949	0.484749		germ-line stem cell division	0.0294	0.284394
																				regulation of GTPase activity	0.04151	0.484309		organic acid metabolic process	0.03985	0.485208		preribosome	0.02952	0.285081
																				mitotic anaphase-promoting complex activity	0.04178	0.485721		oxoacid metabolic process	0.03985	0.485208		TRAPP complex	0.02955	0.285081
																				protein localization to synapse	0.04202	0.485721		glycosaminoglycan biosynthetic process	0.04021	0.485208		establishment or maintenance of neuroblast polarity	0.02978	0.286326
																				vitamin E binding	0.04218	0.485721		DNA hypermethylation	0.04026	0.485208		histone methyltransferase activity	0.03004	0.287526
																				GMP synthase activity	0.04219	0.485721		regulation of DNA methylation	0.04026	0.485208		cell cycle checkpoint	0.03019	0.287983
																				GMP synthase (glutamine-hydrolyzing) activity	0.04219	0.485721		imaginal disc-derived genitalia development	0.04054	0.485208		N-acetyltransferase activity	0.03028	0.287983
																				retinal binding	0.04229	0.485721		sodium ion transmembrane transporter activity	0.04147	0.485208		negative regulation of gene silencing by RNA	0.03066	0.292456
																				response to inorganic substance	0.04256	0.486662		regulation of feeding behavior	0.04172	0.485208		endoplasmic reticulum part	0.03073	0.292456
																				positive regulation of synaptic transmission, cholinergic	0.04296	0.490109		branched-chain amino acid catabolic process	0.04183	0.485208		metal ion homeostasis	0.0315	0.298773
																				exodeoxyribonuclease I activity	0.04308	0.490417		maintenance of gastrointestinal epithelium	0.04207	0.485208		nucleotide transmembrane transporter activity	0.03156	0.298773
																				carbon-oxygen lyase activity	0.04352	0.492418		paracrine signaling	0.04207	0.485208		organophosphate ester transmembrane transporter activity	0.03201	0.301666
																				smooth muscle contraction	0.04353	0.492418		intestinal epithelial structure maintenance	0.04207	0.485208		transport	0.03234	0.303035
																				cholinesterase activity	0.04419	0.493647		5'-3' exodeoxyribonuclease activity	0.04217	0.485208		detection of UV	0.03238	0.303035
																				pyrophosphatase activity	0.04467	0.493647		UDP-glucose 6-dehydrogenase activity	0.04219	0.485208		response to gamma radiation	0.03245	0.303035
																				cellular component biogenesis	0.04479	0.493647		protein carboxylation	0.0422	0.485208		phosphoglycerate dehydrogenase activity	0.03251	0.303035
																				carbohydrate derivative binding	0.04486	0.493647		gamma-glutamyl carboxylase activity	0.0422	0.485208		single-organism metabolic process	0.03261	0.303035
																				uridylyltransferase activity	0.04487	0.493647		peptidyl-glutamic acid carboxylation	0.0422	0.485208		precatalytic spliceosome	0.03294	0.305404
																				diphosphoric monoester hydrolase activity	0.04506	0.493647		ceramide binding	0.04229	0.485208		GAC codon-amino acid adaptor activity	0.03297	0.305404
																				guanosine-3',5'-bis(diphosphate) 3'-diphosphatase activity	0.04506	0.493647		sphingolipid transporter activity	0.04229	0.485208		mRNA cleavage factor complex	0.03343	0.308604
																				guanosine tetraphosphate catabolic process	0.04506	0.493647		sphingolipid binding	0.04229	0.485208		meprin A complex	0.03359	0.308604
																				guanosine tetraphosphate metabolic process	0.04506	0.493647		ceramide transport	0.04229	0.485208		sulfur compound transport	0.03367	0.308604
																				nucleoside bisphosphate catabolic process	0.04506	0.493647		ceramide transporter activity	0.04229	0.485208		protein maturation	0.0338	0.308604
																				purine ribonucleoside bisphosphate catabolic process	0.04506	0.493647		ER to Golgi ceramide transport	0.04229	0.485208		protein metabolic process	0.03388	0.308604
																				ribonucleoside bisphosphate catabolic process	0.04506	0.493647		phosphatidylinositol-4-phosphate binding	0.04229	0.485208		defense response to Gram-negative bacterium	0.03397	0.308604
																				purine ribonucleoside bisphosphate metabolic process	0.04506	0.493647		intracellular lipid transport	0.04229	0.485208		protein demethylation	0.03418	0.308604
																				purine nucleoside bisphosphate catabolic process	0.04506	0.493647		condensed chromosome	0.04274	0.489608		demethylation	0.03418	0.308604
																				resolution of meiotic recombination intermediates	0.04547	0.495643		RNA polymerase II carboxy-terminal domain kinase activity	0.04358	0.497602		protein dealkylation	0.03418	0.308604
																				intra-Golgi vesicle-mediated transport	0.04549	0.495643		ovarian fusome organization	0.04379	0.499068		SNAP receptor activity	0.03437	0.308604
																				procollagen-proline 4-dioxygenase complex	0.04565	0.495643		positive regulation of protein acetylation	0.04425	0.500987		organic substance biosynthetic process	0.0345	0.308604
																				hydrolase activity, acting on acid anhydrides, catalyzing transmembrane movement of substances	0.04575	0.495643		positive regulation of histone acetylation	0.04425	0.500987		very long-chain fatty acid metabolic process	0.03464	0.308604
																				lipase activity	0.04584	0.495643		positive regulation of peptidyl-lysine acetylation	0.04425	0.500987		multicellular organismal homeostasis	0.03466	0.308604
																				taste receptor activity	0.04597	0.49604		ribosomal large subunit biogenesis	0.04477	0.506187		macromolecule biosynthetic process	0.03471	0.308604
																				oxidation-reduction process	0.04606	0.496049		glycerolipid biosynthetic process	0.04524	0.506688		macromolecular complex subunit organization	0.03474	0.308604
																				Golgi vesicle transport	0.04622	0.497169		homeostasis of number of cells	0.04532	0.506688		histone deacetylase complex	0.03497	0.308604
																				motile cilium assembly	0.04627	0.497169		intestinal stem cell homeostasis	0.04532	0.506688		cytosolic part	0.03502	0.308604
																				phosphorylation of RNA polymerase II C-terminal domain	0.04647	0.49787		regulation of cellular response to hypoxia	0.04534	0.506688		nucleoside diphosphate phosphorylation	0.03517	0.308604
																				endodeoxyribonuclease activity	0.04684	0.49787		karyosome formation	0.04626	0.513958		secretion by cell	0.03525	0.308604
																				asparagine synthase (glutamine-hydrolyzing) activity	0.04712	0.49787		negative regulation of phosphorylation	0.04635	0.513958		cellular macromolecule biosynthetic process	0.03532	0.308604
																				asparagine metabolic process	0.04712	0.49787		ecdysone receptor-mediated signaling pathway	0.04645	0.513958		cellular cation homeostasis	0.03533	0.308604
																				asparagine biosynthetic process	0.04712	0.49787		ubiquitin conjugating enzyme binding	0.04647	0.513958		zygotic specification of dorsal/ventral axis	0.03534	0.308604
																				pre-replicative complex assembly	0.04738	0.49787		small protein conjugating enzyme binding	0.04647	0.513958		biosynthetic process	0.03544	0.308604
																				pre-replicative complex assembly involved in cell cycle DNA replication	0.04738	0.49787		oocyte nucleus migration involved in oocyte dorsal/ventral axis specification	0.04653	0.513958		flap endonuclease activity	0.03548	0.308604
																				pre-replicative complex assembly involved in nuclear cell cycle DNA replication	0.04738	0.49787		electron transporter, transferring electrons within CoQH2-cytochrome c reductase complex activity	0.04658	0.513958		polytene chromosome	0.0356	0.308604
																				magnesium ion transport	0.04793	0.49787		GDP binding	0.04703	0.516705		aminoacyl-tRNA hydrolase activity	0.03569	0.308604
																				magnesium ion transmembrane transporter activity	0.04793	0.49787		germline ring canal	0.04716	0.516705		hydrolase activity, acting on carbon-nitrogen (but not peptide) bonds, in cyclic amidines	0.03583	0.308604
																				nuclear transport	0.04805	0.49787		cyclin-dependent protein kinase 5 holoenzyme complex	0.04764	0.519801		purine ribonucleotide transmembrane transporter activity	0.03613	0.308604
																				nucleocytoplasmic transport	0.04805	0.49787		collagen	0.04818	0.523987		adenine nucleotide transmembrane transporter activity	0.03613	0.308604
																				multivesicular body organization	0.04844	0.49787		JUN kinase activity	0.04852	0.529535		purine nucleoside transmembrane transporter activity	0.03613	0.308604
																				cohesin core heterodimer	0.04846	0.49787		DNA-templated transcription, initiation	0.04864	0.529673		purine nucleotide transmembrane transporter activity	0.03613	0.308604
																				UDP-glucose:hexose-1-phosphate uridylyltransferase activity	0.0485	0.49787		selenium binding	0.04947	0.538464		BLOC-2 complex	0.03646	0.311085
																				galactose homeostasis	0.0485	0.49787		organic cyclic compound metabolic process	0.04958	0.538464		skeletal muscle thin filament assembly	0.03653	0.311085
																				ncRNA metabolic process	0.04867	0.49787		translation factor activity, nucleic acid binding	0.04986	0.540544		Arp2/3 protein complex	0.03667	0.311085
																				bis(5'-nucleosyl)-tetraphosphatase (asymmetrical) activity	0.04871	0.49787						response to radiation	0.03672	0.311085
																				bis(5'-nucleosyl)-tetraphosphatase activity	0.04871	0.49787						maternal specification of dorsal/ventral axis, oocyte, germ-line encoded	0.03687	0.311915
																				histone H3-R2 methylation	0.04908	0.49787						folic acid-containing compound metabolic process	0.03752	0.313744
																				histone methyltransferase activity (H3-R2 specific)	0.04908	0.49787						secretion	0.03764	0.313744
																				metaphase plate congression	0.04912	0.49787						clathrin coat of coated pit	0.03765	0.313744
																				cellular response to reactive oxygen species	0.04914	0.49787						clathrin coat of trans-Golgi network vesicle	0.03765	0.313744
																				exonuclease activity	0.04932	0.497995						clathrin vesicle coat	0.03765	0.313744
																				protein destabilization	0.04959	0.498759						clathrin complex	0.03765	0.313744
																				response to organophosphorus	0.04968	0.498759						spindle elongation	0.03784	0.31551
																				regulation of histone H3-K27 methylation	0.04979	0.498925						BLOC complex	0.03815	0.31709
																												ketone biosynthetic process	0.03823	0.31709
																												G-protein coupled photoreceptor activity	0.03856	0.318834
																												odorant binding	0.0386	0.318834
																												intramolecular oxidoreductase activity, transposing C=C bonds	0.03875	0.319299
																												response to hormone	0.03908	0.321446
																												sulfur compound biosynthetic process	0.03962	0.325485
																												peptide hormone processing	0.03978	0.325875
																												tricarboxylic acid transmembrane transporter activity	0.04006	0.327106
																												protein depolymerization	0.04052	0.331
																												oxidoreductase activity, acting on the aldehyde or oxo group of donors	0.04062	0.331206
																												dicarboxylic acid transmembrane transporter activity	0.04127	0.336246
																												polarity specification of anterior/posterior axis	0.0413	0.336246
																												mRNA cleavage and polyadenylation specificity factor complex	0.04171	0.338278
																												spliceosomal complex	0.04182	0.338278
																												Rab geranylgeranyltransferase activity	0.0421	0.339754
																												bounding membrane of organelle	0.04248	0.341757
																												membrane organization	0.04267	0.342024
																												cytoplasmic membrane-bounded vesicle	0.0428	0.342024
																												3'-5' exonuclease activity	0.0432	0.343702
																												centrosome	0.04327	0.343702
																												microtubule depolymerization	0.04337	0.343702
																												nuclear chromosome	0.04378	0.346556
																												vesicle	0.04422	0.348605
																												protein import	0.04424	0.348605
																												cargo loading into vesicle	0.0446	0.353077
																												translation factor activity, nucleic acid binding	0.04465	0.353077
																												establishment of protein localization to organelle	0.04474	0.353077
																												regulation of Wnt signaling pathway	0.04521	0.355673
																												carbohydrate catabolic process	0.04523	0.355673
																												histamine-gated chloride channel activity	0.04602	0.36049
																												histamine-gated chloride channel complex	0.04602	0.36049
																												chaeta development	0.04617	0.36049
																												response to topologically incorrect protein	0.04679	0.363793
																												tRNA nucleotidyltransferase activity	0.04681	0.363793
																												aconitate hydratase activity	0.04688	0.363793
																												covalent chromatin modification	0.0471	0.363793
																												histone modification	0.0471	0.363793
																												Golgi to plasma membrane transport	0.04729	0.364472
																												regulation of catecholamine metabolic process	0.04751	0.365049
																												regulation of cellular amine metabolic process	0.04751	0.365049
																												response to ionizing radiation	0.04756	0.365049
																												synapsis	0.0476	0.365049
																												alcohol biosynthetic process	0.04779	0.365049
																												post-mating behavior	0.04779	0.365049
																												structural constituent of cuticle	0.04785	0.365049
																												regulation of multi-organism process	0.04818	0.366444
																												glutathione biosynthetic process	0.04844	0.366444
																												nonribosomal peptide biosynthetic process	0.04844	0.366444
																												peptide biosynthetic process	0.04844	0.366444
																												steroid biosynthetic process	0.04863	0.367083
																												regulation of female receptivity, post-mating	0.049	0.369414
																												tyrosine metabolic process	0.04913	0.369414
																												single-stranded DNA binding	0.04924	0.369439
																												nuclear pore outer ring	0.0494	0.370889

## Sheet: C1 GO enrichment
GO:0005739	4.062	31	1e-05	0.01765	31	298	304	mitochondrion	fbgn0013702,fbgn0013704,fbgn0013705,fbgn0013701,fbgn0013706,fbgn0013707,fbgn0262952,fbgn0262872,fbgn0013694,fbgn0013695,fbgn0013697,fbgn0013691,fbgn0013692,fbgn0013693,fbgn0013698,fbgn0013699,fbgn0013683,fbgn0013684,fbgn0013685,fbgn0013686,fbgn0013681,fbgn0013689,fbgn0028375,fbgn0013672,fbgn0013673,fbgn0013674,fbgn0013675,fbgn0013676,fbgn0013679,fbgn0034356,fbgn0037512
GO:0044455	1.587	12	6e-05	0.028695	12	141	143	mitochondrial membrane part	fbgn0262952,fbgn0013683,fbgn0013684,fbgn0013685,fbgn0013681,fbgn0013672,fbgn0013673,fbgn0013674,fbgn0013675,fbgn0013676,fbgn0013678,fbgn0013679
GO:0043231	43.852	69	9e-05	0.028695	69	2193	2376	intracellular membrane-bounded organelle	fbgn0261823,fbgn0035761,fbgn0035762,fbgn0011676,fbgn0028541,fbgn0010575,fbgn0001992,fbgn0260632,fbgn0011656,fbgn0086655,fbgn0013702,fbgn0013704,fbgn0013705,fbgn0013701,fbgn0264442,fbgn0013706,fbgn0013707,fbgn0262952,fbgn0010382,fbgn0014189,fbgn0085424,fbgn0040765,fbgn0044324,fbgn0036277,fbgn0040394,fbgn0004858,fbgn0262872,fbgn0013694,fbgn0013695,fbgn0020306,fbgn0013697,fbgn0013691,fbgn0013692,fbg…
GO:0060090	3.233	18	0.0001	0.028695	18	339	340	binding, bridging	fbgn0259745,fbgn0013702,fbgn0013704,fbgn0013705,fbgn0013701,fbgn0013706,fbgn0013707,fbgn0262872,fbgn0013694,fbgn0013695,fbgn0013697,fbgn0013691,fbgn0013692,fbgn0013693,fbgn0013698,fbgn0013699,fbgn0013689,fbgn0052363
GO:0043227	44.422	69	0.00011	0.028695	69	2224	2409	membrane-bounded organelle	fbgn0261823,fbgn0035761,fbgn0035762,fbgn0011676,fbgn0028541,fbgn0010575,fbgn0001992,fbgn0260632,fbgn0011656,fbgn0086655,fbgn0013702,fbgn0013704,fbgn0013705,fbgn0013701,fbgn0264442,fbgn0013706,fbgn0013707,fbgn0262952,fbgn0010382,fbgn0014189,fbgn0085424,fbgn0040765,fbgn0044324,fbgn0036277,fbgn0040394,fbgn0004858,fbgn0262872,fbgn0013694,fbgn0013695,fbgn0020306,fbgn0013697,fbgn0013691,fbgn0013692,fbg…
GO:0000499	2.198	16	0.00014	0.028695	16	314	314	base pairing with mRNA	fbgn0013702,fbgn0013704,fbgn0013705,fbgn0013701,fbgn0013706,fbgn0013707,fbgn0013694,fbgn0013695,fbgn0013697,fbgn0013691,fbgn0013692,fbgn0013693,fbgn0013698,fbgn0013699,fbgn0013689,fbgn0052363
GO:0030533	2.198	16	0.00014	0.028695	16	314	314	triplet codon-amino acid adaptor activity	fbgn0013702,fbgn0013704,fbgn0013705,fbgn0013701,fbgn0013706,fbgn0013707,fbgn0013694,fbgn0013695,fbgn0013697,fbgn0013691,fbgn0013692,fbgn0013693,fbgn0013698,fbgn0013699,fbgn0013689,fbgn0052363
GO:0000498	2.307	16	0.00017	0.028695	16	340	340	base pairing with RNA	fbgn0013702,fbgn0013704,fbgn0013705,fbgn0013701,fbgn0013706,fbgn0013707,fbgn0013694,fbgn0013695,fbgn0013697,fbgn0013691,fbgn0013692,fbgn0013693,fbgn0013698,fbgn0013699,fbgn0013689,fbgn0052363
GO:0000496	2.307	16	0.00017	0.028695	16	340	340	base pairing	fbgn0013702,fbgn0013704,fbgn0013705,fbgn0013701,fbgn0013706,fbgn0013707,fbgn0013694,fbgn0013695,fbgn0013697,fbgn0013691,fbgn0013692,fbgn0013693,fbgn0013698,fbgn0013699,fbgn0013689,fbgn0052363
GO:0016655	0.46	6	0.00017	0.028695	6	35	36	oxidoreductase activity, acting on NAD(P)H, quinone or similar compound as acceptor	fbgn0262952,fbgn0013683,fbgn0013684,fbgn0013685,fbgn0013681,fbgn0013679
GO:0050136	0.46	6	0.00017	0.028695	6	35	36	NADH dehydrogenase (quinone) activity	fbgn0262952,fbgn0013683,fbgn0013684,fbgn0013685,fbgn0013681,fbgn0013679
GO:0008137	0.46	6	0.00017	0.028695	6	35	36	NADH dehydrogenase (ubiquinone) activity	fbgn0262952,fbgn0013683,fbgn0013684,fbgn0013685,fbgn0013681,fbgn0013679
GO:0006412	3.588	17	0.00024	0.0360275	17	524	608	translation	fbgn0013702,fbgn0013704,fbgn0013705,fbgn0013701,fbgn0013706,fbgn0013707,fbgn0013694,fbgn0013695,fbgn0013697,fbgn0013691,fbgn0013692,fbgn0013693,fbgn0013698,fbgn0013699,fbgn0013689,fbgn0034915,fbgn0052363
GO:0048935	0.172	3	0.00027	0.0360275	3	8	8	peripheral nervous system neuron development	fbgn0260632,fbgn0001404,fbgn0011274
GO:0003954	0.526	6	0.00029	0.0360275	6	42	43	NADH dehydrogenase activity	fbgn0262952,fbgn0013683,fbgn0013684,fbgn0013685,fbgn0013681,fbgn0013679
GO:0005747	0.551	6	0.00034	0.0360275	6	48	49	mitochondrial respiratory chain complex I	fbgn0262952,fbgn0013683,fbgn0013684,fbgn0013685,fbgn0013681,fbgn0013679
GO:0034645	7.736	22	0.00034	0.0360275	22	755	855	cellular macromolecule biosynthetic process	fbgn0032816,fbgn0011656,fbgn0013702,fbgn0013704,fbgn0013705,fbgn0013701,fbgn0013706,fbgn0013707,fbgn0010382,fbgn0013694,fbgn0013695,fbgn0013697,fbgn0013691,fbgn0013692,fbgn0013693,fbgn0013698,fbgn0013699,fbgn0000376,fbgn0013689,fbgn0002891,fbgn0034915,fbgn0052363
GO:0030964	0.551	6	0.00034	0.0360275	6	48	49	NADH dehydrogenase complex	fbgn0262952,fbgn0013683,fbgn0013684,fbgn0013685,fbgn0013681,fbgn0013679
GO:0045271	0.551	6	0.00034	0.0360275	6	48	49	respiratory chain complex I	fbgn0262952,fbgn0013683,fbgn0013684,fbgn0013685,fbgn0013681,fbgn0013679
GO:0043229	52.033	75	0.00035	0.0360275	75	2720	2998	intracellular organelle	fbgn0261823,fbgn0035761,fbgn0035762,fbgn0035401,fbgn0011676,fbgn0028541,fbgn0010575,fbgn0027560,fbgn0262483,fbgn0001992,fbgn0260632,fbgn0011656,fbgn0086655,fbgn0020236,fbgn0013702,fbgn0013704,fbgn0013705,fbgn0013701,fbgn0264442,fbgn0013706,fbgn0013707,fbgn0262952,fbgn0010382,fbgn0014189,fbgn0263929,fbgn0085424,fbgn0040765,fbgn0044324,fbgn0036277,fbgn0040394,fbgn0004858,fbgn0262872,fbgn0013694,fbg…
GO:0022904	0.863	7	0.0004	0.0391786	7	72	73	respiratory electron transport chain	fbgn0262952,fbgn0013683,fbgn0013684,fbgn0013674,fbgn0013675,fbgn0013676,fbgn0013678
GO:0022900	0.905	7	0.00046	0.0426759	7	76	77	electron transport chain	fbgn0262952,fbgn0013683,fbgn0013684,fbgn0013674,fbgn0013675,fbgn0013676,fbgn0013678
GO:0009059	8.251	22	0.0005	0.0443996	22	813	913	macromolecule biosynthetic process	fbgn0032816,fbgn0011656,fbgn0013702,fbgn0013704,fbgn0013705,fbgn0013701,fbgn0013706,fbgn0013707,fbgn0010382,fbgn0013694,fbgn0013695,fbgn0013697,fbgn0013691,fbgn0013692,fbgn0013693,fbgn0013698,fbgn0013699,fbgn0000376,fbgn0013689,fbgn0002891,fbgn0034915,fbgn0052363
GO:0016651	0.65	6	0.00058	0.0492367	6	50	53	oxidoreductase activity, acting on NAD(P)H	fbgn0262952,fbgn0013683,fbgn0013684,fbgn0013685,fbgn0013681,fbgn0013679
GO:0043226	52.836	75	0.00062	0.0500658	75	2770	3050	organelle	fbgn0261823,fbgn0035761,fbgn0035762,fbgn0035401,fbgn0011676,fbgn0028541,fbgn0010575,fbgn0027560,fbgn0262483,fbgn0001992,fbgn0260632,fbgn0011656,fbgn0086655,fbgn0020236,fbgn0013702,fbgn0013704,fbgn0013705,fbgn0013701,fbgn0264442,fbgn0013706,fbgn0013707,fbgn0262952,fbgn0010382,fbgn0014189,fbgn0263929,fbgn0085424,fbgn0040765,fbgn0044324,fbgn0036277,fbgn0040394,fbgn0004858,fbgn0262872,fbgn0013694,fbg…
GO:0009055	1.528	8	0.00063	0.0500658	8	145	146	electron carrier activity	fbgn0001992,fbgn0013674,fbgn0013675,fbgn0013676,fbgn0013678,fbgn0031689,fbgn0033978,fbgn0033979
GO:0009058	15.307	31	0.00073	0.0547839	31	1257	1371	biosynthetic process	fbgn0035401,fbgn0011676,fbgn0032816,fbgn0027560,fbgn0011656,fbgn0020236,fbgn0013702,fbgn0013704,fbgn0013705,fbgn0013701,fbgn0013706,fbgn0013707,fbgn0010382,fbgn0013694,fbgn0013695,fbgn0013697,fbgn0013691,fbgn0013692,fbgn0013693,fbgn0013698,fbgn0013699,fbgn0000376,fbgn0013689,fbgn0028375,fbgn0013672,fbgn0013673,fbgn0002891,fbgn0034356,fbgn0034915,fbgn0263782,fbgn0052363
GO:0044429	3.883	14	0.00074	0.0547839	14	398	404	mitochondrial part	fbgn0262952,fbgn0013683,fbgn0013684,fbgn0013685,fbgn0013686,fbgn0013681,fbgn0013672,fbgn0013673,fbgn0013674,fbgn0013675,fbgn0013676,fbgn0013678,fbgn0013679,fbgn0037512
GO:0010977	0.069	2	0.00082	0.0600145	2	2	2	negative regulation of neuron projection development	fbgn0026379,fbgn0266450
GO:0044249	14.029	29	0.00112	0.0775057	29	1170	1282	cellular biosynthetic process	fbgn0011676,fbgn0032816,fbgn0027560,fbgn0011656,fbgn0020236,fbgn0013702,fbgn0013704,fbgn0013705,fbgn0013701,fbgn0013706,fbgn0013707,fbgn0010382,fbgn0013694,fbgn0013695,fbgn0013697,fbgn0013691,fbgn0013692,fbgn0013693,fbgn0013698,fbgn0013699,fbgn0000376,fbgn0013689,fbgn0028375,fbgn0013672,fbgn0013673,fbgn0002891,fbgn0034915,fbgn0263782,fbgn0052363
GO:0055114	6.608	17	0.00128	0.0877616	17	505	508	oxidation-reduction process	fbgn0011676,fbgn0001992,fbgn0262952,fbgn0025628,fbgn0013683,fbgn0013684,fbgn0013685,fbgn0013681,fbgn0013674,fbgn0013675,fbgn0013676,fbgn0013678,fbgn0013679,fbgn0263782,fbgn0031689,fbgn0033978,fbgn0033979
GO:1901576	14.512	29	0.00151	0.102118	29	1199	1305	organic substance biosynthetic process	fbgn0032816,fbgn0027560,fbgn0011656,fbgn0020236,fbgn0013702,fbgn0013704,fbgn0013705,fbgn0013701,fbgn0013706,fbgn0013707,fbgn0010382,fbgn0013694,fbgn0013695,fbgn0013697,fbgn0013691,fbgn0013692,fbgn0013693,fbgn0013698,fbgn0013699,fbgn0000376,fbgn0013689,fbgn0028375,fbgn0013672,fbgn0013673,fbgn0002891,fbgn0034356,fbgn0034915,fbgn0263782,fbgn0052363
GO:0042387	0.317	3	0.0027	0.177999	3	9	9	plasmatocyte differentiation	fbgn0260632,fbgn0011274,fbgn0003079
GO:0008152	66.08	87	0.00273	0.177999	87	4598	4806	metabolic process	fbgn0261823,fbgn0035401,fbgn0011676,fbgn0032816,fbgn0024740,fbgn0027560,fbgn0023081,fbgn0001992,fbgn0260632,fbgn0033362,fbgn0033363,fbgn0033365,fbgn0011656,fbgn0020236,fbgn0013702,fbgn0013704,fbgn0013705,fbgn0013701,fbgn0013706,fbgn0013707,fbgn0262952,fbgn0260775,fbgn0010382,fbgn0014189,fbgn0025628,fbgn0038565,fbgn0033438,fbgn0000464,fbgn0031855,fbgn0030521,fbgn0036277,fbgn0032598,fbgn0029082,fbg…
GO:1902494	7.111	16	0.00293	0.187501	16	492	511	catalytic complex	fbgn0052091,fbgn0086655,fbgn0262952,fbgn0038691,fbgn0020306,fbgn0013683,fbgn0013684,fbgn0013685,fbgn0013681,fbgn0013678,fbgn0013679,fbgn0022382,fbgn0002891,fbgn0005624,fbgn0010549,fbgn0031449
GO:0006091	1.547	7	0.0031	0.192179	7	118	120	generation of precursor metabolites and energy	fbgn0262952,fbgn0013683,fbgn0013684,fbgn0013674,fbgn0013675,fbgn0013676,fbgn0013678
GO:0070069	0.458	4	0.00326	0.196117	4	31	31	cytochrome complex	fbgn0013674,fbgn0013675,fbgn0013676,fbgn0013678
GO:0042386	0.69	4	0.00374	0.222563	4	20	20	hemocyte differentiation	fbgn0260632,fbgn0011274,fbgn0003079,fbgn0021895
GO:0003723	10.754	22	0.00384	0.22485	22	759	776	RNA binding	fbgn0013702,fbgn0013704,fbgn0013705,fbgn0013701,fbgn0013706,fbgn0013707,fbgn0013694,fbgn0013695,fbgn0013697,fbgn0013691,fbgn0013692,fbgn0013693,fbgn0013698,fbgn0013699,fbgn0013689,fbgn0015298,fbgn0003638,fbgn0010278,fbgn0034915,fbgn0021895,fbgn0003435,fbgn0052363
GO:1990204	1.439	7	0.00399	0.228891	7	109	112	oxidoreductase complex	fbgn0262952,fbgn0013683,fbgn0013684,fbgn0013685,fbgn0013681,fbgn0013678,fbgn0013679
GO:0048666	4.639	11	0.00458	0.251645	11	99	104	neuron development	fbgn0010575,fbgn0262018,fbgn0260632,fbgn0024836,fbgn0264442,fbgn0000464,fbgn0001404,fbgn0011274,fbgn0015609,fbgn0033159,fbgn0005630
GO:0000030	0.107	2	0.0046	0.251645	2	12	12	mannosyltransferase activity	fbgn0035401,fbgn0001404
GO:0016491	7.886	17	0.00532	0.293722	17	623	641	oxidoreductase activity	fbgn0011676,fbgn0001992,fbgn0262952,fbgn0025628,fbgn0013683,fbgn0013684,fbgn0013685,fbgn0013681,fbgn0013674,fbgn0013675,fbgn0013676,fbgn0013678,fbgn0013679,fbgn0263782,fbgn0031689,fbgn0033978,fbgn0033979
GO:0044444	32.756	49	0.00594	0.331991	49	2160	2285	cytoplasmic part	fbgn0035762,fbgn0011676,fbgn0028541,fbgn0024980,fbgn0262483,fbgn0013702,fbgn0013704,fbgn0013705,fbgn0013701,fbgn0264561,fbgn0013706,fbgn0013707,fbgn0262952,fbgn0032361,fbgn0262872,fbgn0013694,fbgn0013695,fbgn0013697,fbgn0013691,fbgn0013692,fbgn0013693,fbgn0013698,fbgn0013699,fbgn0000253,fbgn0004509,fbgn0013683,fbgn0013684,fbgn0013685,fbgn0013686,fbgn0013681,fbgn0036105,fbgn0013689,fbgn0028375,fbg…
GO:0004017	0.07	2	0.00671	0.360383	2	6	6	adenylate kinase activity	fbgn0036266,fbgn0022709
GO:0042256	0.007	1	0.00671	0.360383	1	1	1	mature ribosome assembly	fbgn0034915
GO:0033164	0.007	1	0.00692	0.360383	1	1	1	glycolipid 6-alpha-mannosyltransferase activity	fbgn0035401
GO:0004376	0.007	1	0.00692	0.360383	1	1	1	glycolipid mannosyltransferase activity	fbgn0035401
GO:0004378	0.007	1	0.00692	0.360383	1	1	1	GDP-Man:Man1GlcNAc2-PP-Dol alpha-1,3-mannosyltransferase activity	fbgn0035401
GO:0003676	32.326	46	0.00863	0.46798	46	1772	1946	nucleic acid binding	fbgn0261823,fbgn0032815,fbgn0032816,fbgn0032817,fbgn0260632,fbgn0011656,fbgn0086655,fbgn0013702,fbgn0013704,fbgn0013705,fbgn0013701,fbgn0264442,fbgn0013706,fbgn0013707,fbgn0014189,fbgn0085424,fbgn0040765,fbgn0025186,fbgn0004858,fbgn0013694,fbgn0013695,fbgn0020306,fbgn0261548,fbgn0013697,fbgn0013691,fbgn0013692,fbgn0011274,fbgn0013693,fbgn0013698,fbgn0013699,fbgn0036104,fbgn0013689,fbgn0015298,fbg…
GO:0000009	0.009	1	0.00925	0.500756	1	2	2	alpha-1,6-mannosyltransferase activity	fbgn0035401
GO:0019538	29.63	43	0.00966	0.517027	43	2012	2149	protein metabolic process	fbgn0261823,fbgn0023081,fbgn0033362,fbgn0033363,fbgn0033365,fbgn0013702,fbgn0013704,fbgn0013705,fbgn0013701,fbgn0013706,fbgn0013707,fbgn0260775,fbgn0033438,fbgn0000464,fbgn0031855,fbgn0030521,fbgn0029082,fbgn0263395,fbgn0026379,fbgn0013694,fbgn0013695,fbgn0013697,fbgn0013691,fbgn0013692,fbgn0013693,fbgn0053462,fbgn0053461,fbgn0013698,fbgn0013699,fbgn0000253,fbgn0004509,fbgn0033192,fbgn0032303,fbg…
GO:0031492	0.011	1	0.0107	0.568869	1	1	1	nucleosomal DNA binding	fbgn0010278
GO:0035251	0.166	2	0.01073	0.568869	2	9	9	UDP-glucosyltransferase activity	fbgn0027560,fbgn0014075
GO:0016358	0.21	2	0.01128	0.587246	2	5	6	dendrite development	fbgn0024836,fbgn0026379
GO:0042773	0.093	2	0.0115	0.587246	2	5	5	ATP synthesis coupled electron transport	fbgn0013683,fbgn0013684
GO:0003980	0.012	1	0.01154	0.587246	1	1	1	UDP-glucose:glycoprotein glucosyltransferase activity	fbgn0014075
GO:0044464	108.117	125	0.01181	0.587246	125	5549	5945	cell part	fbgn0001987,fbgn0262476,fbgn0259745,fbgn0261823,fbgn0035761,fbgn0035400,fbgn0035762,fbgn0035401,fbgn0011676,fbgn0052091,fbgn0032816,fbgn0028541,fbgn0024980,fbgn0050361,fbgn0010575,fbgn0027560,fbgn0023081,fbgn0262483,fbgn0001992,fbgn0262018,fbgn0000636,fbgn0260632,fbgn0036518,fbgn0011656,fbgn0028645,fbgn0086655,fbgn0020236,fbgn0024836,fbgn0013702,fbgn0034106,fbgn0013704,fbgn0013705,fbgn0013701,fbg…
GO:0008496	0.012	1	0.01181	0.587246	1	1	1	mannan endo-1,6-alpha-mannosidase activity	fbgn0031716
GO:0016602	0.012	1	0.01204	0.588749	1	2	2	CCAAT-binding factor complex	fbgn0032816
GO:0016035	0.012	1	0.0122	0.588749	1	1	1	zeta DNA polymerase complex	fbgn0002891
GO:0044267	19.937	31	0.01304	0.588749	31	1381	1505	cellular protein metabolic process	fbgn0261823,fbgn0023081,fbgn0013702,fbgn0013704,fbgn0013705,fbgn0013701,fbgn0013706,fbgn0013707,fbgn0260775,fbgn0000464,fbgn0031855,fbgn0029082,fbgn0263395,fbgn0026379,fbgn0013694,fbgn0013695,fbgn0013697,fbgn0013691,fbgn0013692,fbgn0013693,fbgn0013698,fbgn0013699,fbgn0000253,fbgn0013689,fbgn0031773,fbgn0022382,fbgn0014075,fbgn0003079,fbgn0034915,fbgn0260941,fbgn0052363
GO:0044424	81.46	98	0.01334	0.588749	98	4842	5211	intracellular part	fbgn0261823,fbgn0035761,fbgn0035762,fbgn0035401,fbgn0011676,fbgn0032816,fbgn0028541,fbgn0024980,fbgn0010575,fbgn0027560,fbgn0262483,fbgn0001992,fbgn0260632,fbgn0011656,fbgn0086655,fbgn0020236,fbgn0013702,fbgn0034106,fbgn0013704,fbgn0013705,fbgn0013701,fbgn0264561,fbgn0264442,fbgn0013706,fbgn0013707,fbgn0262952,fbgn0010382,fbgn0014189,fbgn0263929,fbgn0085424,fbgn0038565,fbgn0040765,fbgn0000464,fbg…
GO:1901363	50.591	65	0.01354	0.588749	65	2738	2935	heterocyclic compound binding	fbgn0261823,fbgn0011676,fbgn0052091,fbgn0032815,fbgn0032816,fbgn0032817,fbgn0023081,fbgn0001992,fbgn0260632,fbgn0011656,fbgn0086655,fbgn0020236,fbgn0013702,fbgn0013704,fbgn0013705,fbgn0013701,fbgn0264442,fbgn0013706,fbgn0013707,fbgn0014189,fbgn0085424,fbgn0025628,fbgn0038565,fbgn0040765,fbgn0025186,fbgn0031855,fbgn0263395,fbgn0004858,fbgn0013694,fbgn0013695,fbgn0020306,fbgn0261548,fbgn0013697,fbg…
GO:0009060	0.194	2	0.01363	0.588749	2	3	3	aerobic respiration	fbgn0013674,fbgn0013676
GO:1902100	0.193	2	0.01422	0.588749	2	16	16	negative regulation of metaphase/anaphase transition of cell cycle	fbgn0010382,fbgn0044324
GO:0045841	0.193	2	0.01422	0.588749	2	16	16	negative regulation of mitotic metaphase/anaphase transition	fbgn0010382,fbgn0044324
GO:0005212	0.014	1	0.01429	0.588749	1	1	1	structural constituent of eye lens	fbgn0005664
GO:0033632	0.014	1	0.01431	0.588749	1	1	1	regulation of cell-cell adhesion mediated by integrin	fbgn0259745
GO:0031519	0.583	3	0.01458	0.588749	3	24	25	PcG protein complex	fbgn0261823,fbgn0086655,fbgn0005624
GO:0015078	1.288	6	0.01466	0.588749	6	94	95	hydrogen ion transmembrane transporter activity	fbgn0013672,fbgn0013673,fbgn0013674,fbgn0013675,fbgn0013676,fbgn0013678
GO:0097159	50.783	65	0.01476	0.588749	65	2753	2951	organic cyclic compound binding	fbgn0261823,fbgn0011676,fbgn0052091,fbgn0032815,fbgn0032816,fbgn0032817,fbgn0023081,fbgn0001992,fbgn0260632,fbgn0011656,fbgn0086655,fbgn0020236,fbgn0013702,fbgn0013704,fbgn0013705,fbgn0013701,fbgn0264442,fbgn0013706,fbgn0013707,fbgn0014189,fbgn0085424,fbgn0025628,fbgn0038565,fbgn0040765,fbgn0025186,fbgn0031855,fbgn0263395,fbgn0004858,fbgn0013694,fbgn0013695,fbgn0020306,fbgn0261548,fbgn0013697,fbg…
GO:0048846	0.663	3	0.01484	0.588749	3	7	7	axon extension involved in axon guidance	fbgn0262018,fbgn0015609,fbgn0033159
GO:1902284	0.663	3	0.01484	0.588749	3	7	7	neuron projection extension involved in neuron projection guidance	fbgn0262018,fbgn0015609,fbgn0033159
GO:0009233	0.015	1	0.01493	0.588749	1	1	1	menaquinone metabolic process	fbgn0028375
GO:0009234	0.015	1	0.01493	0.588749	1	1	1	menaquinone biosynthetic process	fbgn0028375
GO:0003825	0.015	1	0.01525	0.588749	1	1	1	alpha,alpha-trehalose-phosphate synthase (UDP-forming) activity	fbgn0027560
GO:0045839	0.201	2	0.01557	0.588749	2	18	18	negative regulation of mitosis	fbgn0010382,fbgn0044324
GO:0005751	0.339	3	0.01571	0.588749	3	18	18	mitochondrial respiratory chain complex IV	fbgn0013674,fbgn0013675,fbgn0013676
GO:0045277	0.339	3	0.01571	0.588749	3	18	18	respiratory chain complex IV	fbgn0013674,fbgn0013675,fbgn0013676
GO:0031099	0.675	3	0.01602	0.588749	3	14	15	regeneration	fbgn0086655,fbgn0026379,fbgn0259176
GO:0007552	1.02	4	0.0166	0.588749	4	36	37	metamorphosis	fbgn0044324,fbgn0026379,fbgn0266450,fbgn0003079
GO:0032991	35.651	48	0.01662	0.588749	48	2330	2615	macromolecular complex	fbgn0261823,fbgn0035762,fbgn0052091,fbgn0032816,fbgn0024980,fbgn0265194,fbgn0086655,fbgn0034106,fbgn0028875,fbgn0262952,fbgn0010382,fbgn0014189,fbgn0038565,fbgn0000464,fbgn0044324,fbgn0038691,fbgn0032593,fbgn0036277,fbgn0032361,fbgn0263395,fbgn0020306,fbgn0000253,fbgn0013683,fbgn0013684,fbgn0013685,fbgn0013686,fbgn0013681,fbgn0036105,fbgn0261563,fbgn0013672,fbgn0013673,fbgn0013674,fbgn0013675,fbg…
GO:0051784	0.207	2	0.01673	0.588749	2	19	19	negative regulation of nuclear division	fbgn0010382,fbgn0044324
GO:0032101	3.424	8	0.01699	0.588749	8	97	101	regulation of response to external stimulus	fbgn0260632,fbgn0000464,fbgn0026379,fbgn0011274,fbgn0000253,fbgn0015721,fbgn0003079,fbgn0015609
GO:0046527	0.21	2	0.0176	0.588749	2	13	13	glucosyltransferase activity	fbgn0027560,fbgn0014075
GO:0050661	0.24	2	0.01769	0.588749	2	13	13	NADP binding	fbgn0011676,fbgn0263782
GO:0070939	0.018	1	0.01779	0.588749	1	2	2	Dsl1p complex	fbgn0035762
GO:0042255	0.018	1	0.01806	0.588749	1	3	3	ribosome assembly	fbgn0034915
GO:0035171	0.231	2	0.01853	0.588749	2	5	5	lamellocyte differentiation	fbgn0011274,fbgn0003079
GO:0004129	0.371	3	0.01866	0.588749	3	22	22	cytochrome-c oxidase activity	fbgn0013674,fbgn0013675,fbgn0013676
GO:0016675	0.371	3	0.01866	0.588749	3	22	22	oxidoreductase activity, acting on a heme group of donors	fbgn0013674,fbgn0013675,fbgn0013676
GO:0016676	0.371	3	0.01866	0.588749	3	22	22	oxidoreductase activity, acting on a heme group of donors, oxygen as acceptor	fbgn0013674,fbgn0013675,fbgn0013676
GO:0015002	0.371	3	0.01866	0.588749	3	22	22	heme-copper terminal oxidase activity	fbgn0013674,fbgn0013675,fbgn0013676
GO:0046034	0.433	3	0.01898	0.588749	3	28	31	ATP metabolic process	fbgn0013672,fbgn0013673,fbgn0022709
GO:0004252	2.957	8	0.01918	0.588749	8	271	277	serine-type endopeptidase activity	fbgn0033362,fbgn0033363,fbgn0033365,fbgn0053462,fbgn0053461,fbgn0004509,fbgn0033192,fbgn0003319
GO:0032102	0.234	2	0.01965	0.588749	2	12	12	negative regulation of response to external stimulus	fbgn0026379,fbgn0003079
GO:0031175	0.253	2	0.01969	0.588749	2	9	10	neuron projection development	fbgn0024836,fbgn0026379
GO:0043170	42.074	55	0.02072	0.588749	55	2990	3177	macromolecule metabolic process	fbgn0261823,fbgn0032816,fbgn0023081,fbgn0033362,fbgn0033363,fbgn0033365,fbgn0011656,fbgn0013702,fbgn0013704,fbgn0013705,fbgn0013701,fbgn0013706,fbgn0013707,fbgn0260775,fbgn0010382,fbgn0014189,fbgn0033438,fbgn0000464,fbgn0031855,fbgn0030521,fbgn0036277,fbgn0032598,fbgn0029082,fbgn0263395,fbgn0026379,fbgn0040394,fbgn0013694,fbgn0013695,fbgn0013697,fbgn0013691,fbgn0013692,fbgn0013693,fbgn0053462,fbg…
GO:0000217	0.021	1	0.021	0.588749	1	3	3	DNA secondary structure binding	fbgn0010278
GO:0000381	1.792	5	0.02109	0.588749	5	58	59	regulation of alternative mRNA splicing, via spliceosome	fbgn0260632,fbgn0014189,fbgn0036277,fbgn0020306,fbgn0265487
GO:0043234	29.95	41	0.02127	0.588749	41	1829	2008	protein complex	fbgn0261823,fbgn0035762,fbgn0052091,fbgn0032816,fbgn0024980,fbgn0265194,fbgn0086655,fbgn0034106,fbgn0028875,fbgn0262952,fbgn0010382,fbgn0014189,fbgn0038565,fbgn0000464,fbgn0044324,fbgn0038691,fbgn0032593,fbgn0032361,fbgn0263395,fbgn0020306,fbgn0000253,fbgn0013683,fbgn0013684,fbgn0013685,fbgn0013681,fbgn0036105,fbgn0261563,fbgn0013672,fbgn0013673,fbgn0013674,fbgn0013675,fbgn0013676,fbgn0013678,fbg…
GO:0008236	3.708	9	0.02163	0.588749	9	296	307	serine-type peptidase activity	fbgn0033362,fbgn0033363,fbgn0033365,fbgn0053462,fbgn0053461,fbgn0004509,fbgn0033192,fbgn0003319,fbgn0259175
GO:0006964	0.241	2	0.02184	0.588749	2	11	11	positive regulation of biosynthetic process of antibacterial peptides active against Gram-negative bacteria	fbgn0260632,fbgn0011274
GO:0010812	0.022	1	0.02202	0.588749	1	1	1	negative regulation of cell-substrate adhesion	fbgn0026379
GO:0051895	0.022	1	0.02202	0.588749	1	1	1	negative regulation of focal adhesion assembly	fbgn0026379
GO:0051896	0.022	1	0.02202	0.588749	1	1	1	regulation of protein kinase B signaling	fbgn0026379
GO:0051893	0.022	1	0.02202	0.588749	1	1	1	regulation of focal adhesion assembly	fbgn0026379
GO:0051898	0.022	1	0.02202	0.588749	1	1	1	negative regulation of protein kinase B signaling	fbgn0026379
GO:0048681	0.022	1	0.02202	0.588749	1	1	1	negative regulation of axon regeneration	fbgn0026379
GO:0001953	0.022	1	0.02202	0.588749	1	1	1	negative regulation of cell-matrix adhesion	fbgn0026379
GO:0090109	0.022	1	0.02202	0.588749	1	1	1	regulation of cell-substrate junction assembly	fbgn0026379
GO:0051800	0.022	1	0.02202	0.588749	1	1	1	phosphatidylinositol-3,4-bisphosphate 3-phosphatase activity	fbgn0026379
GO:1901889	0.022	1	0.02202	0.588749	1	1	1	negative regulation of cell junction assembly	fbgn0026379
GO:0070571	0.022	1	0.02202	0.588749	1	1	1	negative regulation of neuron projection regeneration	fbgn0026379
GO:0016314	0.022	1	0.02202	0.588749	1	1	1	phosphatidylinositol-3,4,5-trisphosphate 3-phosphatase activity	fbgn0026379
GO:0034594	0.022	1	0.02202	0.588749	1	1	1	phosphatidylinositol trisphosphate phosphatase activity	fbgn0026379
GO:0045333	0.244	2	0.02205	0.588749	2	5	5	cellular respiration	fbgn0013674,fbgn0013676
GO:0017171	3.728	9	0.02206	0.588749	9	298	309	serine hydrolase activity	fbgn0033362,fbgn0033363,fbgn0033365,fbgn0053462,fbgn0053461,fbgn0004509,fbgn0033192,fbgn0003319,fbgn0259175
GO:2000152	0.022	1	0.0221	0.588749	1	2	2	regulation of deubiquitinase activity	fbgn0261823
GO:0035800	0.022	1	0.0221	0.588749	1	2	2	deubiquitinase activator activity	fbgn0261823
GO:0033420	0.035	1	0.02298	0.608227	1	8	8	CUG codon-amino acid adaptor activity	fbgn0052363
GO:0016538	0.247	2	0.02359	0.623532	2	18	18	cyclin-dependent protein serine/threonine kinase regulator activity	fbgn0010382,fbgn0040394
GO:0035520	0.025	1	0.02472	0.62911	1	2	2	monoubiquitinated protein deubiquitination	fbgn0261823
GO:0035517	0.025	1	0.02472	0.62911	1	2	2	PR-DUB complex	fbgn0261823
GO:0035521	0.025	1	0.02472	0.62911	1	2	2	monoubiquitinated histone deubiquitination	fbgn0261823
GO:0035522	0.025	1	0.02472	0.62911	1	2	2	monoubiquitinated histone H2A deubiquitination	fbgn0261823
GO:0046662	0.271	2	0.02612	0.65607	2	17	18	regulation of oviposition	fbgn0001404,fbgn0015872
GO:0048024	1.868	5	0.02625	0.65607	5	64	65	regulation of mRNA splicing, via spliceosome	fbgn0260632,fbgn0014189,fbgn0036277,fbgn0020306,fbgn0265487
GO:0042248	0.026	1	0.02635	0.65607	1	2	2	maintenance of polarity of follicular epithelium	fbgn0001404
GO:0004175	5.347	11	0.02675	0.658484	11	424	436	endopeptidase activity	fbgn0033362,fbgn0033363,fbgn0033365,fbgn0033438,fbgn0030521,fbgn0053462,fbgn0053461,fbgn0004509,fbgn0033192,fbgn0032303,fbgn0003319
GO:0005506	1.986	6	0.02675	0.658484	6	157	159	iron ion binding	fbgn0011676,fbgn0001992,fbgn0013674,fbgn0031689,fbgn0033978,fbgn0033979
GO:0098533	1.147	4	0.02742	0.673029	4	48	50	ATPase dependent transmembrane transport complex	fbgn0052091,fbgn0038691,fbgn0010549,fbgn0031449
GO:0035101	0.028	1	0.02792	0.681416	1	2	2	FACT complex	fbgn0010278
GO:0044237	48.01	61	0.0282	0.683921	61	3308	3500	cellular metabolic process	fbgn0261823,fbgn0011676,fbgn0032816,fbgn0027560,fbgn0023081,fbgn0260632,fbgn0011656,fbgn0020236,fbgn0013702,fbgn0013704,fbgn0013705,fbgn0013701,fbgn0013706,fbgn0013707,fbgn0262952,fbgn0260775,fbgn0010382,fbgn0014189,fbgn0038565,fbgn0000464,fbgn0031855,fbgn0036277,fbgn0029082,fbgn0263395,fbgn0026379,fbgn0085413,fbgn0040394,fbgn0013694,fbgn0013695,fbgn0013697,fbgn0264815,fbgn0013691,fbgn0013692,fbg…
GO:0030155	1.241	4	0.02913	0.685314	4	28	29	regulation of cell adhesion	fbgn0259745,fbgn0026379,fbgn0261563,fbgn0264089
GO:0019187	0.029	1	0.02934	0.685314	1	2	2	beta-1,4-mannosyltransferase activity	fbgn0001404
GO:0006101	0.03	1	0.02948	0.685314	1	2	2	citrate metabolic process	fbgn0020236
GO:0043484	1.914	5	0.0295	0.685314	5	68	69	regulation of RNA splicing	fbgn0260632,fbgn0014189,fbgn0036277,fbgn0020306,fbgn0265487
GO:0042626	2.28	6	0.02951	0.685314	6	113	119	ATPase activity, coupled to transmembrane movement of substances	fbgn0052091,fbgn0038691,fbgn0013672,fbgn0013673,fbgn0010549,fbgn0031449
GO:0043492	2.28	6	0.02951	0.685314	6	113	119	ATPase activity, coupled to movement of substances	fbgn0052091,fbgn0038691,fbgn0013672,fbgn0013673,fbgn0010549,fbgn0031449
GO:0031345	0.758	3	0.02961	0.685314	3	18	22	negative regulation of cell projection organization	fbgn0026379,fbgn0266450,fbgn0015609
GO:0044238	53.228	66	0.0303	0.699512	66	3673	3864	primary metabolic process	fbgn0261823,fbgn0032816,fbgn0024740,fbgn0027560,fbgn0023081,fbgn0033362,fbgn0033363,fbgn0033365,fbgn0011656,fbgn0020236,fbgn0013702,fbgn0013704,fbgn0013705,fbgn0013701,fbgn0013706,fbgn0013707,fbgn0260775,fbgn0010382,fbgn0014189,fbgn0038565,fbgn0033438,fbgn0000464,fbgn0031855,fbgn0030521,fbgn0036277,fbgn0032598,fbgn0029082,fbgn0263395,fbgn0026379,fbgn0040394,fbgn0013694,fbgn0013695,fbgn0013697,fbg…
GO:0031104	0.031	1	0.03081	0.699512	1	2	3	dendrite regeneration	fbgn0026379
GO:0048679	0.031	1	0.03081	0.699512	1	2	2	regulation of axon regeneration	fbgn0026379
GO:0070570	0.031	1	0.03081	0.699512	1	2	2	regulation of neuron projection regeneration	fbgn0026379
GO:0040014	1.25	4	0.0314	0.704116	4	41	45	regulation of multicellular organism growth	fbgn0015269,fbgn0026379,fbgn0003079,fbgn0044047
GO:0019985	0.032	1	0.0317	0.704116	1	4	4	translesion synthesis	fbgn0002891
GO:0016820	2.32	6	0.03178	0.704116	6	115	121	hydrolase activity, acting on acid anhydrides, catalyzing transmembrane movement of substances	fbgn0052091,fbgn0038691,fbgn0013672,fbgn0013673,fbgn0010549,fbgn0031449
GO:0050684	1.95	5	0.0325	0.704116	5	70	74	regulation of mRNA processing	fbgn0260632,fbgn0014189,fbgn0036277,fbgn0020306,fbgn0265487
GO:0007502	0.335	2	0.03259	0.704116	2	5	7	digestive tract mesoderm development	fbgn0261563,fbgn0264089
GO:0009126	0.587	3	0.03263	0.704116	3	41	44	purine nucleoside monophosphate metabolic process	fbgn0013672,fbgn0013673,fbgn0022709
GO:0009167	0.587	3	0.03263	0.704116	3	41	44	purine ribonucleoside monophosphate metabolic process	fbgn0013672,fbgn0013673,fbgn0022709
GO:0034593	0.033	1	0.03276	0.704116	1	3	3	phosphatidylinositol bisphosphate phosphatase activity	fbgn0026379
GO:0020037	2.383	6	0.03314	0.707366	6	132	133	heme binding	fbgn0011676,fbgn0001992,fbgn0013674,fbgn0031689,fbgn0033978,fbgn0033979
GO:0070379	0.033	1	0.03336	0.707774	1	1	1	high mobility group box 1 binding	fbgn0260632
GO:0046906	2.399	6	0.03391	0.713779	6	133	134	tetrapyrrole binding	fbgn0011676,fbgn0001992,fbgn0013674,fbgn0031689,fbgn0033978,fbgn0033979
GO:0016202	0.892	3	0.03472	0.719908	3	8	8	regulation of striated muscle tissue development	fbgn0011656,fbgn0029082,fbgn0028369
GO:1901861	0.892	3	0.03472	0.719908	3	8	8	regulation of muscle tissue development	fbgn0011656,fbgn0029082,fbgn0028369
GO:0051270	1.96	5	0.03565	0.729029	5	35	35	regulation of cellular component movement	fbgn0000464,fbgn0026379,fbgn0261563,fbgn0015609,fbgn0264089
GO:0001952	0.036	1	0.03565	0.729029	1	2	2	regulation of cell-matrix adhesion	fbgn0026379
GO:0015399	2.407	6	0.03645	0.738145	6	135	141	primary active transmembrane transporter activity	fbgn0052091,fbgn0038691,fbgn0013672,fbgn0013673,fbgn0010549,fbgn0031449
GO:0015405	2.407	6	0.03645	0.738145	6	135	141	P-P-bond-hydrolysis-driven transmembrane transporter activity	fbgn0052091,fbgn0038691,fbgn0013672,fbgn0013673,fbgn0010549,fbgn0031449
GO:0004849	0.039	1	0.03893	0.781859	1	3	3	uridine kinase activity	fbgn0022709
GO:0002813	0.331	2	0.04045	0.809581	2	13	13	regulation of biosynthetic process of antibacterial peptides active against Gram-negative bacteria	fbgn0260632,fbgn0011274
GO:0044260	31.975	42	0.04098	0.815035	42	2340	2513	cellular macromolecule metabolic process	fbgn0261823,fbgn0032816,fbgn0023081,fbgn0011656,fbgn0013702,fbgn0013704,fbgn0013705,fbgn0013701,fbgn0013706,fbgn0013707,fbgn0260775,fbgn0010382,fbgn0014189,fbgn0000464,fbgn0031855,fbgn0036277,fbgn0029082,fbgn0263395,fbgn0026379,fbgn0040394,fbgn0013694,fbgn0013695,fbgn0013697,fbgn0013691,fbgn0013692,fbgn0013693,fbgn0013698,fbgn0013699,fbgn0000253,fbgn0000376,fbgn0013689,fbgn0031773,fbgn0022382,fbg…
GO:0043022	0.042	1	0.04112	0.815035	1	7	7	ribosome binding	fbgn0034915
GO:0009161	0.668	3	0.04148	0.817852	3	47	50	ribonucleoside monophosphate metabolic process	fbgn0013672,fbgn0013673,fbgn0022709
GO:0009123	0.672	3	0.04204	0.818195	3	48	51	nucleoside monophosphate metabolic process	fbgn0013672,fbgn0013673,fbgn0022709
GO:0006275	0.336	2	0.04207	0.818195	2	17	17	regulation of DNA replication	fbgn0011676,fbgn0010382
GO:0005791	0.043	1	0.0424	0.818964	1	4	4	rough endoplasmic reticulum	fbgn0014075
GO:0046534	0.351	2	0.04343	0.818964	2	10	10	positive regulation of photoreceptor cell differentiation	fbgn0032816,fbgn0003079
GO:0052689	1.227	4	0.04368	0.818964	4	97	109	carboxylic ester hydrolase activity	fbgn0001987,fbgn0024740,fbgn0023496,fbgn0037090
GO:0019887	0.81	3	0.04378	0.818964	3	44	58	protein kinase regulator activity	fbgn0010382,fbgn0040394,fbgn0022382
GO:0017119	0.044	1	0.04385	0.818964	1	4	4	Golgi transport complex	fbgn0032361
GO:0003878	0.045	1	0.04387	0.818964	1	3	3	ATP citrate synthase activity	fbgn0020236
GO:1901888	0.045	1	0.04464	0.818964	1	2	2	regulation of cell junction assembly	fbgn0026379
GO:0004813	0.046	1	0.04503	0.818964	1	3	3	alanine-tRNA ligase activity	fbgn0027094
GO:0006419	0.046	1	0.04503	0.818964	1	3	3	alanyl-tRNA aminoacylation	fbgn0027094
GO:0045664	4.865	9	0.04525	0.818964	9	96	102	regulation of neuron differentiation	fbgn0032816,fbgn0024836,fbgn0000464,fbgn0026379,fbgn0266450,fbgn0003079,fbgn0015609,fbgn0033159,fbgn0021764
GO:0046532	1.391	4	0.04554	0.818964	4	35	36	regulation of photoreceptor cell differentiation	fbgn0032816,fbgn0266450,fbgn0003079,fbgn0021764
GO:0004611	0.049	1	0.04592	0.818964	1	2	2	phosphoenolpyruvate carboxykinase activity	fbgn0034356
GO:0004613	0.049	1	0.04592	0.818964	1	2	2	phosphoenolpyruvate carboxykinase (GTP) activity	fbgn0034356
GO:0016339	1.462	4	0.04609	0.818964	4	22	24	calcium-dependent cell-cell adhesion	fbgn0262018,fbgn0000636,fbgn0024836,fbgn0015609
GO:0030097	0.836	3	0.04637	0.818964	3	27	27	hemopoiesis	fbgn0020306,fbgn0003079,fbgn0021895
GO:0031491	0.047	1	0.04637	0.818964	1	3	3	nucleosome binding	fbgn0010278
GO:0005911	3.472	7	0.04697	0.818964	7	68	72	cell-cell junction	fbgn0001987,fbgn0000636,fbgn0024836,fbgn0029082,fbgn0028369,fbgn0015609,fbgn0031571
GO:0072350	0.048	1	0.04718	0.818964	1	4	4	tricarboxylic acid metabolic process	fbgn0020236
GO:0046855	0.048	1	0.04771	0.818964	1	3	3	inositol phosphate dephosphorylation	fbgn0026379
GO:0046838	0.048	1	0.04771	0.818964	1	3	3	phosphorylated carbohydrate dephosphorylation	fbgn0026379
GO:0071545	0.048	1	0.04771	0.818964	1	3	3	inositol phosphate catabolic process	fbgn0026379
GO:0003824	61.486	73	0.04855	0.818964	73	3911	4068	catalytic activity	fbgn0001987,fbgn0031716,fbgn0035401,fbgn0011676,fbgn0052091,fbgn0024740,fbgn0027560,fbgn0023081,fbgn0001992,fbgn0033362,fbgn0032032,fbgn0033363,fbgn0033365,fbgn0020236,fbgn0034106,fbgn0262952,fbgn0014189,fbgn0025628,fbgn0036142,fbgn0036266,fbgn0038565,fbgn0033438,fbgn0000464,fbgn0025186,fbgn0001404,fbgn0038691,fbgn0031855,fbgn0030521,fbgn0032598,fbgn0263395,fbgn0026379,fbgn0085413,fbgn0020306,fbg…
GO:0008011	0.05	1	0.04889	0.818964	1	7	7	structural constituent of pupal chitin-based cuticle	fbgn0004554
GO:0015662	0.735	3	0.04903	0.818964	3	38	42	ATPase activity, coupled to transmembrane movement of ions, phosphorylative mechanism	fbgn0038691,fbgn0013672,fbgn0013673
GO:0046351	0.055	1	0.0492	0.818964	1	3	3	disaccharide biosynthetic process	fbgn0027560
GO:0005992	0.055	1	0.0492	0.818964	1	3	3	trehalose biosynthetic process	fbgn0027560
GO:0045467	1.507	4	0.04932	0.818964	4	20	20	R7 cell development	fbgn0262018,fbgn0000464,fbgn0015609,fbgn0005630
GO:0008358	0.05	1	0.04936	0.818964	1	4	4	maternal determination of anterior/posterior axis, embryo	fbgn0260632
GO:0040012	2.118	5	0.04942	0.818964	5	33	33	regulation of locomotion	fbgn0000464,fbgn0026379,fbgn0261563,fbgn0015609,fbgn0264089
GO:0004775	0.051	1	0.04972	0.818964	1	4	4	succinate-CoA ligase (ADP-forming) activity	fbgn0020236
GO:0031330	0.374	2	0.04987	0.818964	2	17	17	negative regulation of cellular catabolic process	fbgn0010382,fbgn0003079
GO:0071897	0.376	2	0.05147	0.842004	2	28	30	DNA biosynthetic process	fbgn0010382,fbgn0002891
GO:0008312	0.053	1	0.05167	0.842641	1	6	6	7S RNA binding	fbgn0015298
GO:0006732	0.831	3	0.05222	0.846672	3	63	63	coenzyme metabolic process	fbgn0020236,fbgn0028375,fbgn0263782
GO:0003674	160.263	170	0.05328	0.85053	170	8582	9112	molecular_function	fbgn0001987,fbgn0031716,fbgn0262476,fbgn0259745,fbgn0261823,fbgn0035761,fbgn0014141,fbgn0035400,fbgn0035401,fbgn0011676,fbgn0052091,fbgn0032815,fbgn0005664,fbgn0032816,fbgn0028541,fbgn0032817,fbgn0024740,fbgn0024980,fbgn0030973,fbgn0050361,fbgn0053196,fbgn0010575,fbgn0027560,fbgn0037836,fbgn0023081,fbgn0001992,fbgn0265194,fbgn0262018,fbgn0260632,fbgn0033362,fbgn0032032,fbgn0033363,fbgn0033365,fbg…
GO:0046174	0.054	1	0.05353	0.85053	1	4	4	polyol catabolic process	fbgn0026379
GO:0033628	0.055	1	0.05377	0.85053	1	3	3	regulation of cell adhesion mediated by integrin	fbgn0259745
GO:0042278	1.974	5	0.05392	0.85053	5	109	112	purine nucleoside metabolic process	fbgn0038565,fbgn0013672,fbgn0013673,fbgn0022709,fbgn0263782
GO:0046128	1.974	5	0.05392	0.85053	5	109	112	purine ribonucleoside metabolic process	fbgn0038565,fbgn0013672,fbgn0013673,fbgn0022709,fbgn0263782
GO:0052866	0.056	1	0.05471	0.855372	1	5	5	phosphatidylinositol phosphate phosphatase activity	fbgn0026379
GO:0031102	0.057	1	0.05588	0.855372	1	3	4	neuron projection regeneration	fbgn0026379
GO:0071704	56.934	68	0.05612	0.855372	68	3926	4125	organic substance metabolic process	fbgn0261823,fbgn0032816,fbgn0024740,fbgn0027560,fbgn0023081,fbgn0260632,fbgn0033362,fbgn0033363,fbgn0033365,fbgn0011656,fbgn0020236,fbgn0013702,fbgn0013704,fbgn0013705,fbgn0013701,fbgn0013706,fbgn0013707,fbgn0260775,fbgn0010382,fbgn0014189,fbgn0038565,fbgn0033438,fbgn0000464,fbgn0031855,fbgn0030521,fbgn0036277,fbgn0032598,fbgn0029082,fbgn0263395,fbgn0026379,fbgn0040394,fbgn0013694,fbgn0013695,fbg…
GO:1901661	0.058	1	0.05623	0.855372	1	7	7	quinone metabolic process	fbgn0028375
GO:1901663	0.058	1	0.05623	0.855372	1	7	7	quinone biosynthetic process	fbgn0028375
GO:0009895	0.4	2	0.05677	0.855372	2	19	19	negative regulation of catabolic process	fbgn0010382,fbgn0003079
GO:0044710	27.409	36	0.05681	0.855372	36	1776	1826	single-organism metabolic process	fbgn0261823,fbgn0011676,fbgn0024740,fbgn0027560,fbgn0001992,fbgn0260632,fbgn0020236,fbgn0262952,fbgn0010382,fbgn0025628,fbgn0038565,fbgn0263395,fbgn0026379,fbgn0264815,fbgn0023496,fbgn0013683,fbgn0013684,fbgn0013685,fbgn0013681,fbgn0028375,fbgn0013672,fbgn0013673,fbgn0013674,fbgn0013675,fbgn0022709,fbgn0013676,fbgn0013678,fbgn0013679,fbgn0002891,fbgn0014075,fbgn0034356,fbgn0027094,fbgn0263782,fbg…
GO:0044446	29.249	38	0.0577	0.855372	38	2243	2424	intracellular organelle part	fbgn0261823,fbgn0032816,fbgn0086655,fbgn0034106,fbgn0264561,fbgn0262952,fbgn0010382,fbgn0014189,fbgn0038565,fbgn0000464,fbgn0044324,fbgn0036277,fbgn0032361,fbgn0004858,fbgn0020306,fbgn0000253,fbgn0004509,fbgn0013683,fbgn0013684,fbgn0013685,fbgn0013686,fbgn0013681,fbgn0013672,fbgn0013673,fbgn0013674,fbgn0013675,fbgn0013676,fbgn0013678,fbgn0013679,fbgn0002891,fbgn0003638,fbgn0014075,fbgn0010278,fbg…
GO:0007586	0.065	1	0.05805	0.855372	1	6	6	digestion	fbgn0023496
GO:0019207	0.906	3	0.05816	0.855372	3	46	60	kinase regulator activity	fbgn0010382,fbgn0040394,fbgn0022382
GO:0001077	1.514	4	0.05823	0.855372	4	33	34	RNA polymerase II core promoter proximal region sequence-specific DNA binding transcription factor activity involved in positive regulation of transcription	fbgn0260632,fbgn0011656,fbgn0085424,fbgn0011274
GO:0035186	0.451	2	0.05837	0.855372	2	17	17	syncytial blastoderm mitotic cell cycle	fbgn0261823,fbgn0005624
GO:0004420	0.059	1	0.05917	0.855372	1	1	1	hydroxymethylglutaryl-CoA reductase (NADPH) activity	fbgn0263782
GO:0031083	0.063	1	0.05975	0.855372	1	8	8	BLOC-1 complex	fbgn0036105
GO:0045666	0.413	2	0.05977	0.855372	2	11	11	positive regulation of neuron differentiation	fbgn0032816,fbgn0003079
GO:0001228	1.526	4	0.05985	0.855372	4	34	36	RNA polymerase II transcription regulatory region sequence-specific DNA binding transcription factor activity involved in positive regulation of transcription	fbgn0260632,fbgn0011656,fbgn0085424,fbgn0011274
GO:0065009	5.8	10	0.06001	0.855372	10	231	244	regulation of molecular function	fbgn0261823,fbgn0010382,fbgn0015269,fbgn0030521,fbgn0029082,fbgn0040394,fbgn0000253,fbgn0013672,fbgn0010278,fbgn0051935
GO:0051186	0.882	3	0.06004	0.855372	3	72	72	cofactor metabolic process	fbgn0020236,fbgn0028375,fbgn0263782
GO:0050931	0.06	1	0.06015	0.855372	1	1	1	pigment cell differentiation	fbgn0021764
GO:0006085	0.062	1	0.06096	0.855372	1	4	4	acetyl-CoA biosynthetic process	fbgn0020236
GO:0048468	10.706	16	0.06107	0.855372	16	279	311	cell development	fbgn0001987,fbgn0010575,fbgn0262018,fbgn0000636,fbgn0260632,fbgn0011656,fbgn0024836,fbgn0264442,fbgn0010382,fbgn0000464,fbgn0001404,fbgn0011274,fbgn0015609,fbgn0033159,fbgn0005630,fbgn0259176
GO:0019915	0.448	2	0.06109	0.855372	2	16	16	lipid storage	fbgn0011656,fbgn0026379
GO:0008286	0.398	2	0.06128	0.855372	2	21	21	insulin receptor signaling pathway	fbgn0026379,fbgn0044047
GO:0016028	0.935	3	0.06177	0.855372	3	29	29	rhabdomere	fbgn0032593,fbgn0000253,fbgn0015721
GO:0016578	0.063	1	0.06186	0.855372	1	7	7	histone deubiquitination	fbgn0261823
GO:0051240	1.517	4	0.06233	0.855372	4	54	60	positive regulation of multicellular organismal process	fbgn0032816,fbgn0015269,fbgn0003079,fbgn0044047
GO:0030104	0.063	1	0.06263	0.855372	1	2	2	water homeostasis	fbgn0015872
GO:0009119	2.071	5	0.063	0.855372	5	118	121	ribonucleoside metabolic process	fbgn0038565,fbgn0013672,fbgn0013673,fbgn0022709,fbgn0263782
GO:0006094	0.067	1	0.06344	0.855372	1	4	4	gluconeogenesis	fbgn0034356
GO:0019646	0.064	1	0.06397	0.855372	1	1	1	aerobic electron transport chain	fbgn0013676
GO:0035168	0.428	2	0.06411	0.855372	2	10	10	larval lymph gland hemocyte differentiation	fbgn0011274,fbgn0003079
GO:0016061	0.065	1	0.06453	0.855372	1	1	1	regulation of light-activated channel activity	fbgn0000253
GO:0031489	0.065	1	0.06453	0.855372	1	1	1	myosin V binding	fbgn0000253
GO:0032851	0.066	1	0.06535	0.855372	1	2	2	positive regulation of Rab GTPase activity	fbgn0051935
GO:0006301	0.067	1	0.0654	0.855372	1	6	6	postreplication repair	fbgn0002891
GO:0042623	5.039	9	0.06547	0.855372	9	276	289	ATPase activity, coupled	fbgn0052091,fbgn0014189,fbgn0038691,fbgn0020306,fbgn0036104,fbgn0013672,fbgn0013673,fbgn0010549,fbgn0031449
GO:1902099	0.43	2	0.06592	0.855372	2	31	31	regulation of metaphase/anaphase transition of cell cycle	fbgn0010382,fbgn0044324
GO:0030071	0.43	2	0.06592	0.855372	2	31	31	regulation of mitotic metaphase/anaphase transition	fbgn0010382,fbgn0044324
GO:0000276	0.245	2	0.06652	0.855372	2	13	13	mitochondrial proton-transporting ATP synthase complex, coupling factor F(o)	fbgn0013672,fbgn0013673
GO:0045263	0.245	2	0.06652	0.855372	2	13	13	proton-transporting ATP synthase complex, coupling factor F(o)	fbgn0013672,fbgn0013673
GO:0016325	0.447	2	0.06677	0.855372	2	16	17	oocyte microtubule cytoskeleton organization	fbgn0263929,fbgn0001404
GO:0005294	0.068	1	0.06757	0.855372	1	1	1	neutral L-amino acid secondary active transmembrane transporter activity	fbgn0034911
GO:0015375	0.068	1	0.06757	0.855372	1	1	1	glycine:sodium symporter activity	fbgn0034911
GO:0005688	0.085	1	0.06812	0.855372	1	12	12	U6 snRNP	fbgn0036277
GO:0043620	0.071	1	0.06873	0.855372	1	4	4	regulation of DNA-templated transcription in response to stress	fbgn0033166
GO:0007559	0.443	2	0.06892	0.855372	2	17	17	histolysis	fbgn0026379,fbgn0011274
GO:0016271	0.443	2	0.06892	0.855372	2	17	17	tissue death	fbgn0026379,fbgn0011274
GO:0019895	0.069	1	0.06892	0.855372	1	1	1	kinesin-associated mitochondrial adaptor activity	fbgn0262872
GO:0045786	1.014	3	0.06912	0.855372	3	39	39	negative regulation of cell cycle	fbgn0010382,fbgn0044324,fbgn0026379
GO:0033301	0.487	2	0.07023	0.855372	2	19	19	cell cycle comprising mitosis without cytokinesis	fbgn0261823,fbgn0005624
GO:0015986	0.278	2	0.0707	0.855372	2	18	19	ATP synthesis coupled proton transport	fbgn0013672,fbgn0013673
GO:0015985	0.278	2	0.0707	0.855372	2	18	19	energy coupled proton transport, down electrochemical gradient	fbgn0013672,fbgn0013673
GO:0006915	1.652	4	0.071	0.855372	4	57	58	apoptotic process	fbgn0263395,fbgn0026379,fbgn0265487,fbgn0005630
GO:0006833	0.073	1	0.07171	0.855372	1	2	2	water transport	fbgn0015872
GO:0052575	0.072	1	0.07242	0.855372	1	1	1	carbohydrate localization	fbgn0011656
GO:0052576	0.072	1	0.07242	0.855372	1	1	1	carbohydrate storage	fbgn0011656
GO:0022890	7.355	12	0.07281	0.855372	12	297	308	inorganic cation transmembrane transporter activity	fbgn0262476,fbgn0265194,fbgn0037238,fbgn0038691,fbgn0032593,fbgn0013672,fbgn0013673,fbgn0013674,fbgn0013675,fbgn0013676,fbgn0013678,fbgn0034911
GO:0008553	0.295	2	0.07285	0.855372	2	21	22	hydrogen-exporting ATPase activity, phosphorylative mechanism	fbgn0013672,fbgn0013673
GO:0032028	0.074	1	0.07289	0.855372	1	2	2	myosin head/neck binding	fbgn0000253
GO:0070854	0.074	1	0.07289	0.855372	1	2	2	myosin VI heavy chain binding	fbgn0000253
GO:0070855	0.074	1	0.07289	0.855372	1	2	2	myosin VI head/neck binding	fbgn0000253
GO:0046364	0.077	1	0.07299	0.855372	1	5	5	monosaccharide biosynthetic process	fbgn0034356
GO:0019319	0.077	1	0.07299	0.855372	1	5	5	hexose biosynthetic process	fbgn0034356
GO:0005786	0.076	1	0.07383	0.855372	1	10	10	signal recognition particle, endoplasmic reticulum targeting	fbgn0015298
GO:0048500	0.076	1	0.07383	0.855372	1	10	10	signal recognition particle	fbgn0015298
GO:0015077	5.767	10	0.07456	0.855372	10	238	245	monovalent inorganic cation transmembrane transporter activity	fbgn0262476,fbgn0037238,fbgn0038691,fbgn0013672,fbgn0013673,fbgn0013674,fbgn0013675,fbgn0013676,fbgn0013678,fbgn0034911
GO:0017022	0.981	3	0.07542	0.855372	3	49	49	myosin binding	fbgn0037836,fbgn0262872,fbgn0000253
GO:0009116	2.192	5	0.07542	0.855372	5	128	131	nucleoside metabolic process	fbgn0038565,fbgn0013672,fbgn0013673,fbgn0022709,fbgn0263782
GO:0072599	0.079	1	0.07595	0.855372	1	11	11	establishment of protein localization to endoplasmic reticulum	fbgn0015298
GO:0006614	0.079	1	0.07595	0.855372	1	11	11	SRP-dependent cotranslational protein targeting to membrane	fbgn0015298
GO:0045047	0.079	1	0.07595	0.855372	1	11	11	protein targeting to ER	fbgn0015298
GO:0043190	0.989	3	0.07623	0.855372	3	41	42	ATP-binding cassette (ABC) transporter complex	fbgn0052091,fbgn0010549,fbgn0031449
GO:0004774	0.079	1	0.07631	0.855372	1	6	6	succinate-CoA ligase activity	fbgn0020236
GO:0002781	0.078	1	0.07728	0.855372	1	2	2	antifungal peptide production	fbgn0011274
GO:0031490	0.08	1	0.07789	0.855372	1	10	11	chromatin DNA binding	fbgn0010278
GO:0044422	30.035	38	0.07801	0.855372	38	2271	2453	organelle part	fbgn0261823,fbgn0032816,fbgn0086655,fbgn0034106,fbgn0264561,fbgn0262952,fbgn0010382,fbgn0014189,fbgn0038565,fbgn0000464,fbgn0044324,fbgn0036277,fbgn0032361,fbgn0004858,fbgn0020306,fbgn0000253,fbgn0004509,fbgn0013683,fbgn0013684,fbgn0013685,fbgn0013686,fbgn0013681,fbgn0013672,fbgn0013673,fbgn0013674,fbgn0013675,fbgn0013676,fbgn0013678,fbgn0013679,fbgn0002891,fbgn0003638,fbgn0014075,fbgn0010278,fbg…
GO:0060564	0.079	1	0.0782	0.855372	1	2	2	negative regulation of mitotic anaphase-promoting complex activity	fbgn0010382
GO:0051352	0.079	1	0.0782	0.855372	1	2	2	negative regulation of ligase activity	fbgn0010382
GO:0051439	0.079	1	0.0782	0.855372	1	2	2	regulation of ubiquitin-protein ligase activity involved in mitotic cell cycle	fbgn0010382
GO:0051436	0.079	1	0.0782	0.855372	1	2	2	negative regulation of ubiquitin-protein ligase activity involved in mitotic cell cycle	fbgn0010382
GO:0051444	0.079	1	0.0782	0.855372	1	2	2	negative regulation of ubiquitin-protein ligase activity	fbgn0010382
GO:0008038	7.055	11	0.07862	0.855372	11	91	94	neuron recognition	fbgn0001987,fbgn0023081,fbgn0000636,fbgn0028645,fbgn0024836,fbgn0264442,fbgn0004509,fbgn0015609,fbgn0033159,fbgn0005630,fbgn0264089
GO:0051674	0.489	2	0.07864	0.855372	2	15	17	localization of cell	fbgn0263929,fbgn0001404
GO:0030720	0.489	2	0.07864	0.855372	2	15	17	oocyte localization involved in germarium-derived egg chamber formation	fbgn0263929,fbgn0001404
GO:0006084	0.082	1	0.07927	0.855372	1	5	5	acetyl-CoA metabolic process	fbgn0020236
GO:0043621	0.082	1	0.07944	0.855372	1	5	5	protein self-association	fbgn0010278
GO:0006123	0.248	2	0.07991	0.855372	2	14	14	mitochondrial electron transport, cytochrome c to oxygen	fbgn0013674,fbgn0013675
GO:0070328	0.497	2	0.08052	0.855372	2	16	16	triglyceride homeostasis	fbgn0263395,fbgn0015721
GO:0006754	0.35	2	0.08072	0.855372	2	20	23	ATP biosynthetic process	fbgn0013672,fbgn0013673
GO:2000145	1.067	3	0.08082	0.855372	3	19	19	regulation of cell motility	fbgn0026379,fbgn0261563,fbgn0264089
GO:0030334	1.067	3	0.08082	0.855372	3	19	19	regulation of cell migration	fbgn0026379,fbgn0261563,fbgn0264089
GO:0006260	0.468	2	0.08094	0.855372	2	53	56	DNA replication	fbgn0000376,fbgn0002891
GO:0004004	0.468	2	0.08102	0.855372	2	42	42	ATP-dependent RNA helicase activity	fbgn0014189,fbgn0036104
GO:0008186	0.468	2	0.08102	0.855372	2	42	42	RNA-dependent ATPase activity	fbgn0014189,fbgn0036104
GO:1901657	2.244	5	0.08129	0.855372	5	130	133	glycosyl compound metabolic process	fbgn0038565,fbgn0013672,fbgn0013673,fbgn0022709,fbgn0263782
GO:0048841	0.551	2	0.08152	0.855372	2	4	4	regulation of axon extension involved in axon guidance	fbgn0000464,fbgn0015609
GO:0008037	7.103	11	0.08215	0.855372	11	93	96	cell recognition	fbgn0001987,fbgn0023081,fbgn0000636,fbgn0028645,fbgn0024836,fbgn0264442,fbgn0004509,fbgn0015609,fbgn0033159,fbgn0005630,fbgn0264089
GO:0030425	1.704	4	0.08218	0.855372	4	43	44	dendrite	fbgn0050361,fbgn0033438,fbgn0015609,fbgn0033159
GO:0019206	0.085	1	0.08219	0.855372	1	8	8	nucleoside kinase activity	fbgn0022709
GO:0007413	1.124	3	0.08257	0.855372	3	16	18	axonal fasciculation	fbgn0000636,fbgn0015609,fbgn0033159
GO:0061330	0.085	1	0.08291	0.855372	1	3	3	Malpighian tubule stellate cell differentiation	fbgn0029082
GO:0009206	0.363	2	0.08318	0.855372	2	24	27	purine ribonucleoside triphosphate biosynthetic process	fbgn0013672,fbgn0013673
GO:0009145	0.363	2	0.08318	0.855372	2	24	27	purine nucleoside triphosphate biosynthetic process	fbgn0013672,fbgn0013673
GO:0004806	0.461	2	0.0832	0.855372	2	28	28	triglyceride lipase activity	fbgn0024740,fbgn0023496
GO:0000138	0.087	1	0.0836	0.855372	1	8	8	Golgi trans cisterna	fbgn0264561
GO:0031475	0.085	1	0.08389	0.855372	1	3	3	myosin V complex	fbgn0000253
GO:0008023	0.516	2	0.08464	0.855372	2	29	29	transcription elongation factor complex	fbgn0010278,fbgn0033166
GO:0005513	0.086	1	0.08465	0.855372	1	3	3	detection of calcium ion	fbgn0000253
GO:0051592	0.086	1	0.08465	0.855372	1	3	3	response to calcium ion	fbgn0000253
GO:0008343	0.534	2	0.0854	0.855372	2	10	10	adult feeding behavior	fbgn0050361,fbgn0003435
GO:0015980	0.499	2	0.0857	0.855372	2	15	15	energy derivation by oxidation of organic compounds	fbgn0013674,fbgn0013676
GO:0055090	0.514	2	0.08572	0.855372	2	17	17	acylglycerol homeostasis	fbgn0263395,fbgn0015721
GO:0002376	5.332	9	0.08584	0.855372	9	226	243	immune system process	fbgn0028541,fbgn0260632,fbgn0011656,fbgn0033438,fbgn0026379,fbgn0011274,fbgn0003079,fbgn0005630,fbgn0021895
GO:0006613	0.09	1	0.08587	0.855372	1	12	12	cotranslational protein targeting to membrane	fbgn0015298
GO:0046912	0.089	1	0.08626	0.855372	1	6	6	transferase activity, transferring acyl groups, acyl groups converted into alkyl on transfer	fbgn0020236
GO:0043021	0.094	1	0.087	0.855372	1	14	14	ribonucleoprotein complex binding	fbgn0034915
GO:0045463	0.562	2	0.08797	0.855372	2	5	5	R8 cell development	fbgn0262018,fbgn0015609
GO:0009201	0.391	2	0.08806	0.855372	2	25	28	ribonucleoside triphosphate biosynthetic process	fbgn0013672,fbgn0013673
GO:0009142	0.391	2	0.08806	0.855372	2	25	28	nucleoside triphosphate biosynthetic process	fbgn0013672,fbgn0013673
GO:0071616	0.092	1	0.08852	0.855372	1	8	8	acyl-CoA biosynthetic process	fbgn0020236
GO:0035384	0.092	1	0.08852	0.855372	1	8	8	thioester biosynthetic process	fbgn0020236
GO:0016887	5.359	9	0.08882	0.855372	9	308	321	ATPase activity	fbgn0052091,fbgn0014189,fbgn0038691,fbgn0020306,fbgn0036104,fbgn0013672,fbgn0013673,fbgn0010549,fbgn0031449
GO:0042776	0.09	1	0.08883	0.855372	1	2	2	mitochondrial ATP synthesis coupled proton transport	fbgn0013672
GO:0019201	0.519	2	0.09001	0.855372	2	15	15	nucleotide kinase activity	fbgn0036266,fbgn0022709
GO:0035206	1.771	4	0.09013	0.855372	4	38	38	regulation of hemocyte proliferation	fbgn0260632,fbgn0026379,fbgn0020306,fbgn0011274
GO:0031577	0.095	1	0.09061	0.855372	1	13	13	spindle checkpoint	fbgn0044324
GO:0007094	0.095	1	0.09061	0.855372	1	13	13	mitotic spindle assembly checkpoint	fbgn0044324
GO:0071174	0.095	1	0.09061	0.855372	1	13	13	mitotic spindle checkpoint	fbgn0044324
GO:0071173	0.095	1	0.09061	0.855372	1	13	13	spindle assembly checkpoint	fbgn0044324
GO:0042575	0.096	1	0.09264	0.855372	1	8	8	DNA polymerase complex	fbgn0002891
GO:0004659	0.097	1	0.09281	0.855372	1	11	12	prenyltransferase activity	fbgn0028375
GO:0015187	0.095	1	0.09327	0.855372	1	3	3	glycine transmembrane transporter activity	fbgn0034911
GO:0005328	0.489	2	0.09416	0.855372	2	21	22	neurotransmitter:sodium symporter activity	fbgn0262476,fbgn0034911
GO:0009205	1.69	4	0.09492	0.855372	4	87	90	purine ribonucleoside triphosphate metabolic process	fbgn0038565,fbgn0013672,fbgn0013673,fbgn0022709
GO:0009144	1.69	4	0.09492	0.855372	4	87	90	purine nucleoside triphosphate metabolic process	fbgn0038565,fbgn0013672,fbgn0013673,fbgn0022709
GO:0033177	0.413	2	0.09546	0.855372	2	31	31	proton-transporting two-sector ATPase complex, proton-transporting domain	fbgn0013672,fbgn0013673
GO:0016681	0.099	1	0.09557	0.855372	1	12	12	oxidoreductase activity, acting on diphenols and related substances as donors, cytochrome as acceptor	fbgn0013678
GO:0008121	0.099	1	0.09557	0.855372	1	12	12	ubiquinol-cytochrome-c reductase activity	fbgn0013678
GO:0032490	0.096	1	0.09562	0.855372	1	1	1	detection of molecule of bacterial origin	fbgn0033159
GO:0007412	1.184	3	0.09611	0.855372	3	16	16	axon target recognition	fbgn0010575,fbgn0000464,fbgn0015609
GO:0051052	0.533	2	0.09677	0.855372	2	35	35	regulation of DNA metabolic process	fbgn0011676,fbgn0010382
GO:0007287	0.099	1	0.09687	0.855372	1	3	5	Nebenkern assembly	fbgn0262872
GO:0019896	0.099	1	0.09704	0.855372	1	4	4	axon transport of mitochondrion	fbgn0262872
GO:0005488	102.333	112	0.09728	0.855372	112	4959	5230	binding	fbgn0259745,fbgn0261823,fbgn0014141,fbgn0011676,fbgn0052091,fbgn0032815,fbgn0005664,fbgn0032816,fbgn0032817,fbgn0024980,fbgn0030973,fbgn0053196,fbgn0010575,fbgn0037836,fbgn0023081,fbgn0001992,fbgn0262018,fbgn0260632,fbgn0011656,fbgn0086655,fbgn0020236,fbgn0024836,fbgn0013702,fbgn0013704,fbgn0013705,fbgn0013701,fbgn0028875,fbgn0264442,fbgn0013706,fbgn0013707,fbgn0260775,fbgn0010382,fbgn0014189,fbg…
GO:0003724	0.523	2	0.09785	0.855372	2	48	48	RNA helicase activity	fbgn0014189,fbgn0036104
GO:0052547	0.55	2	0.09812	0.855372	2	28	29	regulation of peptidase activity	fbgn0261823,fbgn0029082
GO:0051129	3.242	6	0.09851	0.855372	6	116	124	negative regulation of cellular component organization	fbgn0010382,fbgn0015269,fbgn0044324,fbgn0026379,fbgn0266450,fbgn0015609
GO:0032036	0.101	1	0.09865	0.855372	1	5	5	myosin heavy chain binding	fbgn0000253
GO:0009199	1.718	4	0.09877	0.855372	4	88	91	ribonucleoside triphosphate metabolic process	fbgn0038565,fbgn0013672,fbgn0013673,fbgn0022709
GO:0005083	2.518	5	0.0988	0.855372	5	76	78	small GTPase regulator activity	fbgn0023081,fbgn0036518,fbgn0015269,fbgn0263395,fbgn0051935
GO:0035232	0.102	1	0.09892	0.855372	1	2	2	germ cell attraction	fbgn0263782
GO:0016705	2.282	5	0.09929	0.855372	5	170	174	oxidoreductase activity, acting on paired donors, with incorporation or reduction of molecular oxygen	fbgn0011676,fbgn0001992,fbgn0031689,fbgn0033978,fbgn0033979
GO:0030951	0.552	2	0.0993	0.855372	2	22	23	establishment or maintenance of microtubule cytoskeleton polarity	fbgn0263929,fbgn0001404
GO:0042787	0.104	1	0.09978	0.855372	1	9	9	protein ubiquitination involved in ubiquitin-dependent protein catabolic process	fbgn0031773
GO:2000146	0.103	1	0.09995	0.855372	1	4	4	negative regulation of cell motility	fbgn0026379
GO:0051271	0.103	1	0.09995	0.855372	1	4	4	negative regulation of cellular component movement	fbgn0026379
GO:0030336	0.103	1	0.09995	0.855372	1	4	4	negative regulation of cell migration	fbgn0026379
GO:0040013	0.103	1	0.09995	0.855372	1	4	4	negative regulation of locomotion	fbgn0026379
GO:0035321	0.104	1	0.10077	0.855372	1	3	3	maintenance of imaginal disc-derived wing hair orientation	fbgn0001987
GO:0009141	1.73	4	0.1008	0.855372	4	90	93	nucleoside triphosphate metabolic process	fbgn0038565,fbgn0013672,fbgn0013673,fbgn0022709
GO:0050767	6.468	10	0.10081	0.855372	10	128	135	regulation of neurogenesis	fbgn0032816,fbgn0024836,fbgn0000464,fbgn0026379,fbgn0266450,fbgn0003079,fbgn0015609,fbgn0033159,fbgn0021764,fbgn0259176
GO:0005575	140.108	149	0.10148	0.855372	149	7347	7784	cellular_component	fbgn0001987,fbgn0262476,fbgn0259745,fbgn0261823,fbgn0035761,fbgn0014141,fbgn0035400,fbgn0035763,fbgn0035762,fbgn0035401,fbgn0011676,fbgn0052091,fbgn0005664,fbgn0032816,fbgn0028541,fbgn0024980,fbgn0029507,fbgn0050361,fbgn0053196,fbgn0010575,fbgn0027560,fbgn0023081,fbgn0262483,fbgn0001992,fbgn0265194,fbgn0262018,fbgn0000636,fbgn0260632,fbgn0036518,fbgn0011656,fbgn0028645,fbgn0086655,fbgn0020236,fbg…
GO:0008039	2.629	5	0.10178	0.855372	5	32	32	synaptic target recognition	fbgn0001987,fbgn0023081,fbgn0000636,fbgn0264442,fbgn0004509
GO:0035182	0.102	1	0.10192	0.855372	1	1	2	female germline ring canal outer rim	fbgn0014141
GO:0005681	1.78	4	0.10202	0.855372	4	180	180	spliceosomal complex	fbgn0014189,fbgn0036277,fbgn0003638,fbgn0021895
GO:0002775	0.105	1	0.10215	0.855372	1	4	4	antimicrobial peptide production	fbgn0011274
GO:0002440	0.105	1	0.10215	0.855372	1	4	4	production of molecular mediator of immune response	fbgn0011274
GO:0043462	0.105	1	0.10252	0.855372	1	3	3	regulation of ATPase activity	fbgn0013672
GO:0030952	0.561	2	0.10295	0.855372	2	23	24	establishment or maintenance of cytoskeleton polarity	fbgn0263929,fbgn0001404
GO:0001715	0.106	1	0.10357	0.855372	1	2	2	ectodermal cell fate specification	fbgn0260632
GO:0016049	4.128	7	0.1044	0.855372	7	71	76	cell growth	fbgn0265194,fbgn0262018,fbgn0263929,fbgn0015269,fbgn0000464,fbgn0015609,fbgn0033159
GO:0050976	0.105	1	0.10442	0.855372	1	2	2	detection of mechanical stimulus involved in sensory perception of touch	fbgn0033159
GO:0016776	0.564	2	0.1046	0.855372	2	21	21	phosphotransferase activity, phosphate group as acceptor	fbgn0036266,fbgn0022709
GO:0005918	1.169	3	0.10464	0.855372	3	32	33	septate junction	fbgn0001987,fbgn0000636,fbgn0031571
GO:0007496	0.107	1	0.10466	0.855372	1	4	4	anterior midgut development	fbgn0011656
GO:0019829	1.072	3	0.10467	0.855372	3	61	66	cation-transporting ATPase activity	fbgn0038691,fbgn0013672,fbgn0013673
GO:0042625	1.072	3	0.10467	0.855372	3	61	66	ATPase activity, coupled to transmembrane movement of ions	fbgn0038691,fbgn0013672,fbgn0013673
GO:0042044	0.564	2	0.10535	0.855372	2	18	19	fluid transport	fbgn0015872,fbgn0031571
GO:0007299	0.11	1	0.10593	0.855372	1	4	4	ovarian follicle cell-cell adhesion	fbgn0001404
GO:0001743	0.11	1	0.10595	0.855372	1	4	4	optic placode formation	fbgn0001404
GO:0001744	0.11	1	0.10595	0.855372	1	4	4	optic lobe placode formation	fbgn0001404
GO:0060788	0.11	1	0.10595	0.855372	1	4	4	ectodermal placode formation	fbgn0001404
GO:0042461	3.366	6	0.10634	0.855372	6	52	55	photoreceptor cell development	fbgn0010575,fbgn0262018,fbgn0024836,fbgn0000464,fbgn0015609,fbgn0005630
GO:0046856	0.113	1	0.10732	0.855372	1	9	9	phosphatidylinositol dephosphorylation	fbgn0026379
GO:0046839	0.113	1	0.10732	0.855372	1	9	9	phospholipid dephosphorylation	fbgn0026379
GO:0097485	12.455	17	0.10756	0.855372	17	224	238	neuron projection guidance	fbgn0014141,fbgn0010575,fbgn0000636,fbgn0086655,fbgn0024836,fbgn0261509,fbgn0000464,fbgn0001404,fbgn0020306,fbgn0000253,fbgn0022382,fbgn0015609,fbgn0005624,fbgn0033159,fbgn0005630,fbgn0003435,fbgn0264089
GO:0042246	0.618	2	0.10764	0.855372	2	11	11	tissue regeneration	fbgn0086655,fbgn0259176
GO:0006637	0.113	1	0.10782	0.855372	1	10	10	acyl-CoA metabolic process	fbgn0020236
GO:0035383	0.113	1	0.10782	0.855372	1	10	10	thioester metabolic process	fbgn0020236
GO:0030234	6.345	10	0.10784	0.855372	10	299	318	enzyme regulator activity	fbgn0261823,fbgn0023081,fbgn0036518,fbgn0010382,fbgn0015269,fbgn0263395,fbgn0040394,fbgn0264815,fbgn0022382,fbgn0051935
GO:0070001	0.144	1	0.10785	0.855372	1	17	17	aspartic-type peptidase activity	fbgn0032303
GO:0004190	0.144	1	0.10785	0.855372	1	17	17	aspartic-type endopeptidase activity	fbgn0032303
GO:0000725	0.114	1	0.10787	0.855372	1	16	16	recombinational repair	fbgn0002891
GO:0000724	0.114	1	0.10787	0.855372	1	16	16	double-strand break repair via homologous recombination	fbgn0002891
GO:0010975	3.376	6	0.10845	0.855372	6	61	66	regulation of neuron projection development	fbgn0024836,fbgn0000464,fbgn0026379,fbgn0266450,fbgn0015609,fbgn0033159
GO:0010960	0.109	1	0.10872	0.855372	1	1	1	magnesium ion homeostasis	fbgn0265194
GO:0031082	0.117	1	0.10896	0.855372	1	12	12	BLOC complex	fbgn0036105
GO:0032108	0.113	1	0.1091	0.855372	1	6	6	negative regulation of response to nutrient levels	fbgn0003079
GO:0032105	0.113	1	0.1091	0.855372	1	6	6	negative regulation of response to extracellular stimulus	fbgn0003079
GO:0016242	0.113	1	0.1091	0.855372	1	6	6	negative regulation of macroautophagy	fbgn0003079
GO:0043900	1.84	4	0.1091	0.855372	4	87	93	regulation of multi-organism process	fbgn0260632,fbgn0001404,fbgn0015872,fbgn0011274
GO:0035102	0.114	1	0.10928	0.855372	1	10	10	PRC1 complex	fbgn0005624
GO:0006325	2.511	5	0.10929	0.855372	5	194	308	chromatin organization	fbgn0261823,fbgn0014189,fbgn0044324,fbgn0020306,fbgn0005624
GO:0070853	0.113	1	0.10935	0.855372	1	3	3	myosin VI binding	fbgn0000253
GO:0044719	1.221	3	0.10953	0.855372	3	20	20	regulation of imaginal disc-derived wing size	fbgn0264442,fbgn0010382,fbgn0005630
GO:0042451	0.493	2	0.1097	0.855372	2	38	41	purine nucleoside biosynthetic process	fbgn0013672,fbgn0013673
GO:0046129	0.493	2	0.1097	0.855372	2	38	41	purine ribonucleoside biosynthetic process	fbgn0013672,fbgn0013673
GO:0022804	5.555	9	0.11035	0.855372	9	297	306	active transmembrane transporter activity	fbgn0262476,fbgn0052091,fbgn0037238,fbgn0038691,fbgn0013672,fbgn0013673,fbgn0034911,fbgn0010549,fbgn0031449
GO:0009150	3.292	6	0.11079	0.855372	6	127	130	purine ribonucleotide metabolic process	fbgn0038565,fbgn0264815,fbgn0013672,fbgn0013673,fbgn0022709,fbgn0263782
GO:0005516	1.217	3	0.111	0.855372	3	27	33	calmodulin binding	fbgn0011676,fbgn0264815,fbgn0000253
GO:0051310	0.118	1	0.1122	0.855372	1	16	16	metaphase plate congression	fbgn0044324
GO:0009127	0.504	2	0.11278	0.855372	2	33	36	purine nucleoside monophosphate biosynthetic process	fbgn0013672,fbgn0013673
GO:0009168	0.504	2	0.11278	0.855372	2	33	36	purine ribonucleoside monophosphate biosynthetic process	fbgn0013672,fbgn0013673
GO:0008065	0.117	1	0.11285	0.855372	1	3	3	establishment of blood-nerve barrier	fbgn0001987
GO:1902495	4.925	8	0.11301	0.855372	8	126	131	transmembrane transporter complex	fbgn0052091,fbgn0265194,fbgn0028875,fbgn0038691,fbgn0032593,fbgn0013678,fbgn0010549,fbgn0031449
GO:1990351	4.925	8	0.11301	0.855372	8	126	131	transporter complex	fbgn0052091,fbgn0265194,fbgn0028875,fbgn0038691,fbgn0032593,fbgn0013678,fbgn0010549,fbgn0031449
GO:0005725	0.118	1	0.11324	0.855372	1	6	7	intercalary heterochromatin	fbgn0005624
GO:0005750	0.119	1	0.11325	0.855372	1	13	13	mitochondrial respiratory chain complex III	fbgn0013678
GO:0045275	0.119	1	0.11325	0.855372	1	13	13	respiratory chain complex III	fbgn0013678
GO:0043005	4.18	7	0.11418	0.855372	7	83	84	neuron projection	fbgn0050361,fbgn0023081,fbgn0033438,fbgn0000464,fbgn0015609,fbgn0033159,fbgn0262579
GO:0007156	3.468	6	0.11457	0.855372	6	32	33	homophilic cell adhesion	fbgn0262018,fbgn0000636,fbgn0024836,fbgn0029082,fbgn0028369,fbgn0015609
GO:0036442	0.495	2	0.11459	0.855372	2	39	40	hydrogen-exporting ATPase activity	fbgn0013672,fbgn0013673
GO:0042995	6.595	10	0.11548	0.855372	10	163	166	cell projection	fbgn0050361,fbgn0023081,fbgn0033438,fbgn0000464,fbgn0032593,fbgn0000253,fbgn0015721,fbgn0015609,fbgn0033159,fbgn0262579
GO:0070593	0.613	2	0.1156	0.855372	2	8	8	dendrite self-avoidance	fbgn0024836,fbgn0033159
GO:0015250	0.175	1	0.11567	0.855372	1	5	5	water channel activity	fbgn0015872
GO:0006963	0.602	2	0.11572	0.855372	2	23	27	positive regulation of antibacterial peptide biosynthetic process	fbgn0260632,fbgn0011274
GO:0048588	3.459	6	0.11575	0.855372	6	45	48	developmental cell growth	fbgn0262018,fbgn0263929,fbgn0015269,fbgn0000464,fbgn0015609,fbgn0033159
GO:0016062	0.12	1	0.11584	0.855372	1	4	4	adaptation of rhodopsin mediated signaling	fbgn0000253
GO:0023058	0.12	1	0.11584	0.855372	1	4	4	adaptation of signaling pathway	fbgn0000253
GO:0001885	0.121	1	0.11606	0.855372	1	4	4	endothelial cell development	fbgn0001987
GO:0006163	3.337	6	0.11628	0.855372	6	130	134	purine nucleotide metabolic process	fbgn0038565,fbgn0264815,fbgn0013672,fbgn0013673,fbgn0022709,fbgn0263782
GO:0019908	0.121	1	0.11641	0.855372	1	7	7	nuclear cyclin-dependent protein kinase holoenzyme complex	fbgn0010382
GO:0000307	0.121	1	0.11641	0.855372	1	7	7	cyclin-dependent protein kinase holoenzyme complex	fbgn0010382
GO:0004386	1.187	3	0.11645	0.855372	3	100	104	helicase activity	fbgn0014189,fbgn0020306,fbgn0036104
GO:0045475	1.902	4	0.11658	0.855372	4	55	57	locomotor rhythm	fbgn0011656,fbgn0015269,fbgn0038693,fbgn0022382
GO:0015936	0.122	1	0.11688	0.855372	1	6	6	coenzyme A metabolic process	fbgn0263782
GO:0035069	0.122	1	0.11722	0.856464	1	6	6	larval midgut histolysis	fbgn0026379
GO:0008273	0.12	1	0.11824	0.856485	1	5	5	calcium, potassium:sodium antiporter activity	fbgn0037238
GO:0036022	0.118	1	0.11839	0.856485	1	1	1	limb joint morphogenesis	fbgn0085424
GO:0035204	0.121	1	0.11898	0.856485	1	4	4	negative regulation of lamellocyte differentiation	fbgn0014141
GO:0045614	0.121	1	0.11898	0.856485	1	4	4	negative regulation of plasmatocyte differentiation	fbgn0014141
GO:0031476	0.125	1	0.11936	0.856485	1	4	4	myosin VI complex	fbgn0000253
GO:0009259	3.365	6	0.11949	0.856485	6	132	135	ribonucleotide metabolic process	fbgn0038565,fbgn0264815,fbgn0013672,fbgn0013673,fbgn0022709,fbgn0263782
GO:0019693	3.365	6	0.11949	0.856485	6	132	135	ribose phosphate metabolic process	fbgn0038565,fbgn0264815,fbgn0013672,fbgn0013673,fbgn0022709,fbgn0263782
GO:0031397	0.124	1	0.11962	0.856485	1	4	4	negative regulation of protein ubiquitination	fbgn0010382
GO:0005044	0.596	2	0.12036	0.856485	2	24	24	scavenger receptor activity	fbgn0033192,fbgn0031571
GO:0008593	2.666	5	0.12052	0.856485	5	94	98	regulation of Notch signaling pathway	fbgn0024836,fbgn0029082,fbgn0020306,fbgn0003090,fbgn0259176
GO:0046209	0.121	1	0.12079	0.856485	1	1	1	nitric oxide metabolic process	fbgn0011676
GO:0004517	0.121	1	0.12079	0.856485	1	1	1	nitric-oxide synthase activity	fbgn0011676
GO:0006809	0.121	1	0.12079	0.856485	1	1	1	nitric oxide biosynthetic process	fbgn0011676
GO:0003682	1.894	4	0.12117	0.856485	4	114	120	chromatin binding	fbgn0261823,fbgn0034634,fbgn0000376,fbgn0010278
GO:0019205	0.616	2	0.12246	0.856485	2	27	27	nucleobase-containing compound kinase activity	fbgn0036266,fbgn0022709
GO:0033875	0.128	1	0.12253	0.856485	1	7	7	ribonucleoside bisphosphate metabolic process	fbgn0263782
GO:0033865	0.128	1	0.12253	0.856485	1	7	7	nucleoside bisphosphate metabolic process	fbgn0263782
GO:0034032	0.128	1	0.12253	0.856485	1	7	7	purine nucleoside bisphosphate metabolic process	fbgn0263782
GO:0006342	0.613	2	0.12292	0.856485	2	41	106	chromatin silencing	fbgn0261823,fbgn0005624
GO:0004497	0.614	2	0.12296	0.856485	2	35	38	monooxygenase activity	fbgn0011676,fbgn0033979
GO:0040018	0.62	2	0.12373	0.856485	2	23	27	positive regulation of multicellular organism growth	fbgn0015269,fbgn0044047
GO:0051087	0.132	1	0.12381	0.856485	1	18	18	chaperone binding	fbgn0015544
GO:0045814	0.616	2	0.12385	0.856485	2	42	107	negative regulation of gene expression, epigenetic	fbgn0261823,fbgn0005624
GO:0048058	0.126	1	0.12392	0.856485	1	2	2	compound eye corneal lens development	fbgn0005664
GO:0009108	0.601	2	0.12433	0.856485	2	49	49	coenzyme biosynthetic process	fbgn0020236,fbgn0028375
GO:0015175	0.13	1	0.12471	0.856485	1	5	5	neutral amino acid transmembrane transporter activity	fbgn0034911
GO:0003823	0.128	1	0.12513	0.856542	1	5	5	antigen binding	fbgn0033159
GO:0021551	0.129	1	0.12559	0.856879	1	3	3	central nervous system morphogenesis	fbgn0033159
GO:0051537	0.143	1	0.12621	0.858004	1	15	15	2 iron, 2 sulfur cluster binding	fbgn0025628
GO:0004726	0.148	1	0.12676	0.860199	1	6	6	non-membrane spanning protein tyrosine phosphatase activity	fbgn0026379
GO:0006612	0.137	1	0.12916	0.860984	1	14	14	protein targeting to membrane	fbgn0015298
GO:1901659	0.571	2	0.12998	0.860984	2	44	47	glycosyl compound biosynthetic process	fbgn0013672,fbgn0013673
GO:0042455	0.571	2	0.12998	0.860984	2	44	47	ribonucleoside biosynthetic process	fbgn0013672,fbgn0013673
GO:0009163	0.571	2	0.12998	0.860984	2	44	47	nucleoside biosynthetic process	fbgn0013672,fbgn0013673
GO:0043169	29.904	36	0.12999	0.860984	36	1350	1382	cation binding	fbgn0259745,fbgn0011676,fbgn0032815,fbgn0005664,fbgn0032817,fbgn0030973,fbgn0053196,fbgn0010575,fbgn0001992,fbgn0262018,fbgn0086655,fbgn0024836,fbgn0028875,fbgn0264442,fbgn0033438,fbgn0040765,fbgn0025186,fbgn0026379,fbgn0004858,fbgn0000253,fbgn0003090,fbgn0261565,fbgn0013674,fbgn0013675,fbgn0265487,fbgn0266450,fbgn0015609,fbgn0005624,fbgn0040351,fbgn0260941,fbgn0034481,fbgn0005630,fbgn0031689,fbg…
GO:0030382	0.136	1	0.13034	0.860984	1	7	7	sperm mitochondrion organization	fbgn0262872
GO:0050790	5.08	8	0.13054	0.860984	8	201	214	regulation of catalytic activity	fbgn0261823,fbgn0010382,fbgn0015269,fbgn0030521,fbgn0029082,fbgn0040394,fbgn0013672,fbgn0051935
GO:0042393	0.141	1	0.13078	0.860984	1	17	19	histone binding	fbgn0044324
GO:0048634	1.341	3	0.13086	0.860984	3	16	16	regulation of muscle organ development	fbgn0011656,fbgn0029082,fbgn0028369
GO:0005991	0.143	1	0.13093	0.860984	1	6	6	trehalose metabolic process	fbgn0027560
GO:0005984	0.143	1	0.13093	0.860984	1	6	6	disaccharide metabolic process	fbgn0027560
GO:0051536	0.661	2	0.13211	0.860984	2	47	48	iron-sulfur cluster binding	fbgn0053196,fbgn0025628
GO:0051540	0.661	2	0.13211	0.860984	2	47	48	metal cluster binding	fbgn0053196,fbgn0025628
GO:0032435	0.139	1	0.13255	0.860984	1	5	5	negative regulation of proteasomal ubiquitin-dependent protein catabolic process	fbgn0010382
GO:1901799	0.139	1	0.13255	0.860984	1	5	5	negative regulation of proteasomal protein catabolic process	fbgn0010382
GO:0042177	0.139	1	0.13255	0.860984	1	5	5	negative regulation of protein catabolic process	fbgn0010382
GO:0009156	0.581	2	0.13275	0.860984	2	38	41	ribonucleoside monophosphate biosynthetic process	fbgn0013672,fbgn0013673
GO:0005326	0.621	2	0.13284	0.860984	2	25	26	neurotransmitter transporter activity	fbgn0262476,fbgn0034911
GO:0009124	0.586	2	0.1338	0.865769	2	39	42	nucleoside monophosphate biosynthetic process	fbgn0013672,fbgn0013673
GO:0002064	0.141	1	0.13406	0.865769	1	6	7	epithelial cell development	fbgn0001987
GO:0070160	1.306	3	0.13525	0.86939	3	35	37	occluding junction	fbgn0001987,fbgn0000636,fbgn0031571
GO:0051496	0.139	1	0.13542	0.86939	1	3	3	positive regulation of stress fiber assembly	fbgn0035761
GO:0032233	0.139	1	0.13542	0.86939	1	3	3	positive regulation of actin filament bundle assembly	fbgn0035761
GO:0010810	0.14	1	0.13596	0.87022	1	3	3	regulation of cell-substrate adhesion	fbgn0026379
GO:0051303	0.146	1	0.13701	0.871388	1	18	18	establishment of chromosome localization	fbgn0044324
GO:0072521	3.492	6	0.13745	0.871388	6	143	147	purine-containing compound metabolic process	fbgn0038565,fbgn0264815,fbgn0013672,fbgn0013673,fbgn0022709,fbgn0263782
GO:0035207	0.146	1	0.13848	0.871388	1	6	6	negative regulation of hemocyte proliferation	fbgn0020306
GO:0005797	0.147	1	0.13865	0.871388	1	10	10	Golgi medial cisterna	fbgn0264561
GO:0001672	0.146	1	0.13933	0.871388	1	9	9	regulation of chromatin assembly or disassembly	fbgn0010278
GO:0048495	0.14	1	0.1396	0.871388	1	1	1	Roundabout binding	fbgn0264089
GO:0051188	0.648	2	0.13991	0.871388	2	57	57	cofactor biosynthetic process	fbgn0020236,fbgn0028375
GO:0048057	0.141	1	0.14081	0.871388	1	1	1	R3/R4 development	fbgn0024836
GO:0016060	0.149	1	0.14104	0.871388	1	5	5	metarhodopsin inactivation	fbgn0000253
GO:0008603	0.147	1	0.14127	0.871388	1	3	3	cAMP-dependent protein kinase regulator activity	fbgn0022382
GO:0042127	6.051	9	0.14161	0.871388	9	146	148	regulation of cell proliferation	fbgn0011676,fbgn0260632,fbgn0010382,fbgn0026379,fbgn0020306,fbgn0011274,fbgn0003079,fbgn0260941,fbgn0259176
GO:0016787	29.095	35	0.14205	0.871388	35	1811	1901	hydrolase activity	fbgn0001987,fbgn0031716,fbgn0052091,fbgn0024740,fbgn0033362,fbgn0032032,fbgn0033363,fbgn0033365,fbgn0034106,fbgn0014189,fbgn0038565,fbgn0033438,fbgn0000464,fbgn0038691,fbgn0030521,fbgn0032598,fbgn0026379,fbgn0020306,fbgn0261548,fbgn0264815,fbgn0053462,fbgn0053461,fbgn0023496,fbgn0004509,fbgn0033192,fbgn0036104,fbgn0032303,fbgn0013672,fbgn0013673,fbgn0010549,fbgn0015544,fbgn0037090,fbgn0003319,fbg…
GO:0002237	0.148	1	0.14252	0.871388	1	4	4	response to molecule of bacterial origin	fbgn0033159
GO:0030054	6.087	9	0.14276	0.871388	9	117	122	cell junction	fbgn0001987,fbgn0259745,fbgn0000636,fbgn0024836,fbgn0000464,fbgn0029082,fbgn0028369,fbgn0015609,fbgn0031571
GO:0005704	0.15	1	0.14278	0.871388	1	9	11	polytene chromosome band	fbgn0005624
GO:0060326	0.155	1	0.14291	0.871388	1	4	4	cell chemotaxis	fbgn0263782
GO:0051438	0.151	1	0.14305	0.871388	1	6	6	regulation of ubiquitin-protein ligase activity	fbgn0010382
GO:0048589	6.937	10	0.14352	0.871388	10	137	149	developmental growth	fbgn0262018,fbgn0086655,fbgn0263929,fbgn0015269,fbgn0000464,fbgn0015609,fbgn0015544,fbgn0033159,fbgn0051146,fbgn0259176
GO:0008057	0.154	1	0.14362	0.871388	1	13	13	eye pigment granule organization	fbgn0036105
GO:0007277	0.152	1	0.14369	0.871388	1	8	8	pole cell development	fbgn0010382
GO:0003697	0.154	1	0.14393	0.871388	1	13	24	single-stranded DNA binding	fbgn0010278
GO:0050997	0.144	1	0.14428	0.871388	1	1	1	quaternary ammonium group binding	fbgn0028875
GO:0042165	0.144	1	0.14428	0.871388	1	1	1	neurotransmitter binding	fbgn0028875
GO:0042166	0.144	1	0.14428	0.871388	1	1	1	acetylcholine binding	fbgn0028875
GO:1901653	0.685	2	0.14458	0.871388	2	24	24	cellular response to peptide	fbgn0026379,fbgn0044047
GO:0071375	0.685	2	0.14458	0.871388	2	24	24	cellular response to peptide hormone stimulus	fbgn0026379,fbgn0044047
GO:0032869	0.685	2	0.14458	0.871388	2	24	24	cellular response to insulin stimulus	fbgn0026379,fbgn0044047
GO:0044262	1.323	3	0.14476	0.871388	3	70	71	cellular carbohydrate metabolic process	fbgn0027560,fbgn0020236,fbgn0026379
GO:1990234	2.031	4	0.14517	0.871388	4	171	176	transferase complex	fbgn0086655,fbgn0020306,fbgn0022382,fbgn0002891
GO:0072511	1.349	3	0.1461	0.871388	3	34	36	divalent inorganic cation transport	fbgn0265194,fbgn0037238,fbgn0032593
GO:0070838	1.349	3	0.1461	0.871388	3	34	36	divalent metal ion transport	fbgn0265194,fbgn0037238,fbgn0032593
GO:0030695	2.829	5	0.14615	0.871388	5	86	88	GTPase regulator activity	fbgn0023081,fbgn0036518,fbgn0015269,fbgn0263395,fbgn0051935
GO:0005391	0.158	1	0.14626	0.871388	1	7	9	sodium:potassium-exchanging ATPase activity	fbgn0038691
GO:0005890	0.158	1	0.14626	0.871388	1	7	8	sodium:potassium-exchanging ATPase complex	fbgn0038691
GO:0008556	0.158	1	0.14626	0.871388	1	7	9	potassium-transporting ATPase activity	fbgn0038691
GO:0090533	0.158	1	0.14626	0.871388	1	7	8	cation-transporting ATPase complex	fbgn0038691
GO:0022857	16.385	21	0.14638	0.871388	21	755	771	transmembrane transporter activity	fbgn0262476,fbgn0035400,fbgn0052091,fbgn0265194,fbgn0028875,fbgn0037238,fbgn0038691,fbgn0032593,fbgn0015872,fbgn0013672,fbgn0013673,fbgn0013674,fbgn0013675,fbgn0013676,fbgn0013678,fbgn0050394,fbgn0050277,fbgn0034911,fbgn0010549,fbgn0037512,fbgn0031449
GO:0005283	0.155	1	0.14699	0.871388	1	4	5	sodium:amino acid symporter activity	fbgn0034911
GO:0045448	0.703	2	0.14738	0.871388	2	28	31	mitotic cell cycle, embryonic	fbgn0261823,fbgn0005624
GO:0002786	0.691	2	0.14738	0.871388	2	25	29	regulation of antibacterial peptide production	fbgn0260632,fbgn0011274
GO:0002808	0.691	2	0.14738	0.871388	2	25	29	regulation of antibacterial peptide biosynthetic process	fbgn0260632,fbgn0011274
GO:0045747	0.684	2	0.14803	0.871388	2	36	37	positive regulation of Notch signaling pathway	fbgn0029082,fbgn0020306
GO:1901652	0.695	2	0.14831	0.871388	2	25	25	response to peptide	fbgn0026379,fbgn0044047
GO:0032868	0.695	2	0.14831	0.871388	2	25	25	response to insulin	fbgn0026379,fbgn0044047
GO:0043434	0.695	2	0.14831	0.871388	2	25	25	response to peptide hormone	fbgn0026379,fbgn0044047
GO:0030154	14.825	19	0.1484	0.871388	19	721	738	cell differentiation	fbgn0001987,fbgn0035762,fbgn0260632,fbgn0083945,fbgn0033557,fbgn0036277,fbgn0029082,fbgn0040394,fbgn0020306,fbgn0011274,fbgn0028369,fbgn0265487,fbgn0010278,fbgn0003079,fbgn0005630,fbgn0021895,fbgn0021764,fbgn0259176,fbgn0264089
GO:0000982	2.085	4	0.14921	0.87198	4	51	52	RNA polymerase II core promoter proximal region sequence-specific DNA binding transcription factor activity	fbgn0260632,fbgn0011656,fbgn0085424,fbgn0011274
GO:0042051	2.889	5	0.14922	0.87198	5	46	49	compound eye photoreceptor development	fbgn0262018,fbgn0024836,fbgn0000464,fbgn0015609,fbgn0005630
GO:0051340	0.159	1	0.14991	0.87198	1	7	7	regulation of ligase activity	fbgn0010382
GO:0051383	0.16	1	0.1501	0.87198	1	8	8	kinetochore organization	fbgn0000253
GO:0046872	29.398	35	0.15032	0.87198	35	1328	1360	metal ion binding	fbgn0259745,fbgn0011676,fbgn0032815,fbgn0005664,fbgn0032817,fbgn0030973,fbgn0053196,fbgn0010575,fbgn0001992,fbgn0262018,fbgn0086655,fbgn0024836,fbgn0264442,fbgn0033438,fbgn0040765,fbgn0025186,fbgn0026379,fbgn0004858,fbgn0000253,fbgn0003090,fbgn0261565,fbgn0013674,fbgn0013675,fbgn0265487,fbgn0266450,fbgn0015609,fbgn0005624,fbgn0040351,fbgn0260941,fbgn0034481,fbgn0005630,fbgn0031689,fbgn0033978,fbg…
GO:1902600	0.637	2	0.15154	0.87198	2	55	56	hydrogen ion transmembrane transport	fbgn0013672,fbgn0013673
GO:0008154	0.163	1	0.15168	0.87198	1	11	12	actin polymerization or depolymerization	fbgn0023081
GO:0046933	0.161	1	0.15181	0.87198	1	11	12	proton-transporting ATP synthase activity, rotational mechanism	fbgn0013672
GO:0016059	0.711	2	0.15224	0.87198	2	15	15	deactivation of rhodopsin mediated signaling	fbgn0000253,fbgn0015721
GO:0022400	0.711	2	0.15224	0.87198	2	15	15	regulation of rhodopsin mediated signaling pathway	fbgn0000253,fbgn0015721
GO:0050770	2.145	4	0.15303	0.87198	4	31	31	regulation of axonogenesis	fbgn0024836,fbgn0000464,fbgn0015609,fbgn0033159
GO:0042593	0.16	1	0.15342	0.87198	1	5	5	glucose homeostasis	fbgn0015721
GO:0060589	2.872	5	0.15346	0.87198	5	92	94	nucleoside-triphosphatase regulator activity	fbgn0023081,fbgn0036518,fbgn0015269,fbgn0263395,fbgn0051935
GO:0046529	0.708	2	0.15382	0.87198	2	18	19	imaginal disc fusion, thorax closure	fbgn0033438,fbgn0015544
GO:0043647	0.164	1	0.1539	0.87198	1	7	7	inositol phosphate metabolic process	fbgn0026379
GO:0016405	0.166	1	0.15394	0.87198	1	13	13	CoA-ligase activity	fbgn0020236
GO:0016878	0.166	1	0.15394	0.87198	1	13	13	acid-thiol ligase activity	fbgn0020236
GO:0051101	0.166	1	0.15423	0.87198	1	10	10	regulation of DNA binding	fbgn0010278
GO:0035199	0.155	1	0.15497	0.87198	1	1	1	salt aversion	fbgn0040726
GO:0050839	2.186	4	0.15506	0.87198	4	27	27	cell adhesion molecule binding	fbgn0262018,fbgn0024836,fbgn0028369,fbgn0015609
GO:0009791	1.388	3	0.15564	0.87198	3	52	54	post-embryonic development	fbgn0026379,fbgn0020306,fbgn0003079
GO:0005372	0.22	1	0.15566	0.87198	1	7	7	water transmembrane transporter activity	fbgn0015872
GO:0007411	12.282	16	0.15585	0.87198	16	216	230	axon guidance	fbgn0014141,fbgn0010575,fbgn0000636,fbgn0086655,fbgn0024836,fbgn0261509,fbgn0000464,fbgn0001404,fbgn0000253,fbgn0022382,fbgn0015609,fbgn0005624,fbgn0033159,fbgn0005630,fbgn0003435,fbgn0264089
GO:0004722	0.705	2	0.15627	0.872777	2	40	42	protein serine/threonine phosphatase activity	fbgn0026379,fbgn0015544
GO:0016265	4.506	7	0.15699	0.875428	7	160	162	death	fbgn0030521,fbgn0263395,fbgn0026379,fbgn0011274,fbgn0265487,fbgn0005630,fbgn0259176
GO:1902667	0.749	2	0.15849	0.883072	2	7	7	regulation of axon guidance	fbgn0000464,fbgn0015609
GO:0022407	0.726	2	0.15895	0.883072	2	19	20	regulation of cell-cell adhesion	fbgn0259745,fbgn0264089
GO:0003014	0.794	2	0.15914	0.883072	2	12	12	renal system process	fbgn0015872,fbgn0028369
GO:0034250	0.725	2	0.15965	0.883412	2	30	34	positive regulation of cellular amide metabolic process	fbgn0260632,fbgn0011274
GO:0002807	0.725	2	0.15965	0.883412	2	30	34	positive regulation of antimicrobial peptide biosynthetic process	fbgn0260632,fbgn0011274
GO:0042462	2.958	5	0.16083	0.88551	5	48	51	eye photoreceptor cell development	fbgn0262018,fbgn0024836,fbgn0000464,fbgn0015609,fbgn0005630
GO:0070011	8.565	12	0.16149	0.88551	12	581	601	peptidase activity, acting on L-amino acid peptides	fbgn0033362,fbgn0033363,fbgn0033365,fbgn0033438,fbgn0030521,fbgn0053462,fbgn0053461,fbgn0004509,fbgn0033192,fbgn0032303,fbgn0003319,fbgn0259175
GO:1900424	0.731	2	0.16164	0.88551	2	28	32	regulation of defense response to bacterium	fbgn0260632,fbgn0011274
GO:0048515	0.175	1	0.16184	0.88551	1	15	18	spermatid differentiation	fbgn0001987
GO:0040007	7.972	11	0.16199	0.88551	11	169	187	growth	fbgn0265194,fbgn0262018,fbgn0086655,fbgn0263929,fbgn0015269,fbgn0000464,fbgn0015609,fbgn0015544,fbgn0033159,fbgn0051146,fbgn0259176
GO:0048789	0.173	1	0.16241	0.886034	1	5	5	cytoskeletal matrix organization at active zone	fbgn0262483
GO:0016709	0.17	1	0.16296	0.887347	1	7	8	oxidoreductase activity, acting on paired donors, with incorporation or reduction of molecular oxygen, NAD(P)H as one donor, and incorporation of one atom of oxygen	fbgn0011676
GO:0003887	0.177	1	0.16356	0.88758	1	19	19	DNA-directed DNA polymerase activity	fbgn0002891
GO:0030715	0.164	1	0.16378	0.88758	1	1	1	oocyte growth in germarium-derived egg chamber	fbgn0263929
GO:0045316	0.176	1	0.16564	0.892256	1	4	4	negative regulation of compound eye photoreceptor development	fbgn0266450
GO:0042480	0.176	1	0.16564	0.892256	1	4	4	negative regulation of eye photoreceptor cell development	fbgn0266450
GO:0071666	0.17	1	0.16585	0.892256	1	2	2	Slit-Robo signaling complex	fbgn0264089
GO:0022617	0.172	1	0.16601	0.892256	1	3	3	extracellular matrix disassembly	fbgn0033438
GO:0034769	0.172	1	0.16601	0.892256	1	3	3	basement membrane disassembly	fbgn0033438
GO:0034061	0.181	1	0.16686	0.894318	1	20	20	DNA polymerase activity	fbgn0002891
GO:0048037	2.142	4	0.16818	0.898397	4	172	174	cofactor binding	fbgn0011676,fbgn0020236,fbgn0025628,fbgn0263782
GO:0048148	0.181	1	0.16855	0.89901	1	9	10	behavioral response to cocaine	fbgn0022382
GO:0001555	0.171	1	0.16979	0.90142	1	3	4	oocyte growth	fbgn0263929
GO:0005720	0.183	1	0.16983	0.90142	1	13	14	nuclear heterochromatin	fbgn0005624
GO:0040037	0.177	1	0.17009	0.90142	1	2	2	negative regulation of fibroblast growth factor receptor signaling pathway	fbgn0033438
GO:0040009	0.172	1	0.17066	0.902874	1	2	2	regulation of growth rate	fbgn0263395
GO:0016679	0.186	1	0.17208	0.907387	1	18	19	oxidoreductase activity, acting on diphenols and related substances as donors	fbgn0013678
GO:0045498	0.186	1	0.17243	0.907387	1	10	10	sex comb development	fbgn0261823
GO:0035050	0.761	2	0.17274	0.907387	2	19	19	embryonic heart tube development	fbgn0263782,fbgn0264089
GO:0031931	0.188	1	0.17363	0.908428	1	3	3	TORC1 complex	fbgn0263395
GO:0043256	0.177	1	0.17402	0.908428	1	2	2	laminin complex	fbgn0261563
GO:0005606	0.177	1	0.17402	0.908428	1	2	2	laminin-1 complex	fbgn0261563
GO:0005509	7.18	10	0.17475	0.909934	10	204	214	calcium ion binding	fbgn0005664,fbgn0030973,fbgn0053196,fbgn0262018,fbgn0024836,fbgn0000253,fbgn0015609,fbgn0040351,fbgn0034481,fbgn0264089
GO:0022821	0.185	1	0.17521	0.909934	1	7	7	potassium ion antiporter activity	fbgn0037238
GO:0005214	1.39	3	0.17541	0.909934	3	141	144	structural constituent of chitin-based cuticle	fbgn0005664,fbgn0035788,fbgn0004554
GO:0006006	0.196	1	0.17544	0.909934	1	19	19	glucose metabolic process	fbgn0034356
GO:0000090	0.192	1	0.17645	0.911673	1	17	18	mitotic anaphase	fbgn0044324
GO:0098581	0.196	1	0.17719	0.913005	1	7	7	detection of external biotic stimulus	fbgn0033159
GO:0090066	4.67	7	0.17781	0.913005	7	131	134	regulation of anatomical structure size	fbgn0001987,fbgn0023081,fbgn0264442,fbgn0010382,fbgn0263395,fbgn0026379,fbgn0005630
GO:0050920	0.796	2	0.17795	0.913005	2	8	8	regulation of chemotaxis	fbgn0000464,fbgn0015609
GO:0005343	0.21	1	0.17798	0.913005	1	9	10	organic acid:sodium symporter activity	fbgn0034911
GO:0048534	1.485	3	0.17912	0.913135	3	40	44	hematopoietic or lymphoid organ development	fbgn0020306,fbgn0003079,fbgn0021895
GO:0016015	0.193	1	0.17954	0.913135	1	7	7	morphogen activity	fbgn0260632
GO:0007520	1.513	3	0.17958	0.913135	3	30	32	myoblast fusion	fbgn0011656,fbgn0029082,fbgn0028369
GO:0006949	1.513	3	0.17958	0.913135	3	30	32	syncytium formation	fbgn0011656,fbgn0029082,fbgn0028369
GO:0000768	1.513	3	0.17958	0.913135	3	30	32	syncytium formation by plasma membrane fusion	fbgn0011656,fbgn0029082,fbgn0028369
GO:0032992	0.188	1	0.18027	0.914755	1	3	3	protein-carbohydrate complex	fbgn0264089
GO:0071417	0.783	2	0.18055	0.914755	2	30	30	cellular response to organonitrogen compound	fbgn0026379,fbgn0044047
GO:0050914	0.186	1	0.18126	0.915763	1	3	3	sensory perception of salty taste	fbgn0040726
GO:0001047	0.199	1	0.18428	0.921804	1	10	10	core promoter binding	fbgn0005624
GO:0016504	0.196	1	0.18543	0.921804	1	10	10	peptidase activator activity	fbgn0261823
GO:0045665	0.201	1	0.18571	0.921804	1	6	6	negative regulation of neuron differentiation	fbgn0021764
GO:0046533	0.201	1	0.18571	0.921804	1	6	6	negative regulation of photoreceptor cell differentiation	fbgn0021764
GO:0008299	0.202	1	0.18572	0.921804	1	12	12	isoprenoid biosynthetic process	fbgn0263782
GO:0031201	0.203	1	0.18591	0.921804	1	23	23	SNARE complex	fbgn0024980
GO:0048788	0.199	1	0.18614	0.921804	1	3	3	presynaptic cytoskeletal matrix assembled at active zones	fbgn0262483
GO:0048878	2.248	4	0.18624	0.921804	4	94	96	chemical homeostasis	fbgn0265194,fbgn0263395,fbgn0015872,fbgn0015721
GO:0055069	0.199	1	0.18625	0.921804	1	6	6	zinc ion homeostasis	fbgn0265194
GO:0032968	0.202	1	0.18654	0.921804	1	10	10	positive regulation of transcription elongation from RNA polymerase II promoter	fbgn0011656
GO:1901616	0.212	1	0.18662	0.921804	1	11	11	organic hydroxy compound catabolic process	fbgn0026379
GO:0046164	0.212	1	0.18662	0.921804	1	11	11	alcohol catabolic process	fbgn0026379
GO:0008063	0.794	2	0.18677	0.921804	2	36	36	Toll signaling pathway	fbgn0260632,fbgn0011274
GO:0038201	0.205	1	0.18753	0.923876	1	5	5	TOR complex	fbgn0263395
GO:0050974	0.203	1	0.18832	0.92426	1	6	6	detection of mechanical stimulus involved in sensory perception	fbgn0033159
GO:0050982	0.203	1	0.18832	0.92426	1	6	6	detection of mechanical stimulus	fbgn0033159
GO:0008233	8.871	12	0.18877	0.92426	12	603	624	peptidase activity	fbgn0033362,fbgn0033363,fbgn0033365,fbgn0033438,fbgn0030521,fbgn0053462,fbgn0053461,fbgn0004509,fbgn0033192,fbgn0032303,fbgn0003319,fbgn0259175
GO:0032412	0.204	1	0.19019	0.92426	1	5	5	regulation of ion transmembrane transporter activity	fbgn0000253
GO:0022898	0.204	1	0.19019	0.92426	1	5	5	regulation of transmembrane transporter activity	fbgn0000253
GO:0032409	0.204	1	0.19019	0.92426	1	5	5	regulation of transporter activity	fbgn0000253
GO:0008324	9.849	13	0.19052	0.92426	13	385	398	cation transmembrane transporter activity	fbgn0262476,fbgn0265194,fbgn0028875,fbgn0037238,fbgn0038691,fbgn0032593,fbgn0013672,fbgn0013673,fbgn0013674,fbgn0013675,fbgn0013676,fbgn0013678,fbgn0034911
GO:0032786	0.207	1	0.19082	0.92426	1	11	11	positive regulation of DNA-templated transcription, elongation	fbgn0011656
GO:0009595	0.213	1	0.19133	0.92426	1	9	9	detection of biotic stimulus	fbgn0033159
GO:0016458	1.531	3	0.19141	0.92426	3	82	162	gene silencing	fbgn0261823,fbgn0020306,fbgn0005624
GO:0042066	0.208	1	0.19295	0.92865	1	6	6	perineurial glial growth	fbgn0015269
GO:0090175	0.818	2	0.19326	0.92865	2	21	21	regulation of establishment of planar polarity	fbgn0024836,fbgn0026379
GO:0050660	0.804	2	0.19336	0.92865	2	57	57	flavin adenine dinucleotide binding	fbgn0011676,fbgn0025628
GO:0008156	0.206	1	0.19348	0.92865	1	10	10	negative regulation of DNA replication	fbgn0011676
GO:0015992	0.78	2	0.19476	0.92865	2	62	63	proton transport	fbgn0013672,fbgn0013673
GO:0006818	0.78	2	0.19476	0.92865	2	62	63	hydrogen transport	fbgn0013672,fbgn0013673
GO:0050773	1.56	3	0.19545	0.92865	3	32	37	regulation of dendrite development	fbgn0026379,fbgn0015609,fbgn0033159
GO:0031344	3.96	6	0.19555	0.92865	6	84	90	regulation of cell projection organization	fbgn0024836,fbgn0000464,fbgn0026379,fbgn0266450,fbgn0015609,fbgn0033159
GO:0022404	0.838	2	0.19571	0.92865	2	15	16	molting cycle process	fbgn0053196,fbgn0263782
GO:0070035	0.812	2	0.1961	0.92865	2	77	80	purine NTP-dependent helicase activity	fbgn0014189,fbgn0036104
GO:0008026	0.812	2	0.1961	0.92865	2	77	80	ATP-dependent helicase activity	fbgn0014189,fbgn0036104
GO:0006338	0.822	2	0.197	0.929399	2	57	58	chromatin remodeling	fbgn0014189,fbgn0005624
GO:0016334	0.826	2	0.19719	0.929399	2	24	24	establishment or maintenance of polarity of follicular epithelium	fbgn0001404,fbgn0003079
GO:0007425	0.215	1	0.19781	0.930164	1	7	7	epithelial cell fate determination, open tracheal system	fbgn0026379
GO:0001558	2.358	4	0.1983	0.930164	4	51	52	regulation of cell growth	fbgn0000464,fbgn0026379,fbgn0015609,fbgn0259176
GO:0015630	0.208	1	0.20037	0.93083	1	4	4	microtubule cytoskeleton	fbgn0263929
GO:0000398	2.299	4	0.20044	0.93083	4	220	227	mRNA splicing, via spliceosome	fbgn0014189,fbgn0036277,fbgn0003638,fbgn0021895
GO:0005215	18.111	22	0.20044	0.93083	22	867	886	transporter activity	fbgn0262476,fbgn0035400,fbgn0052091,fbgn0028541,fbgn0265194,fbgn0028875,fbgn0037238,fbgn0038691,fbgn0032593,fbgn0015872,fbgn0013672,fbgn0013673,fbgn0013674,fbgn0013675,fbgn0013676,fbgn0013678,fbgn0050394,fbgn0050277,fbgn0034911,fbgn0010549,fbgn0037512,fbgn0031449
GO:0000377	2.299	4	0.20044	0.93083	4	220	227	RNA splicing, via transesterification reactions with bulged adenosine as nucleophile	fbgn0014189,fbgn0036277,fbgn0003638,fbgn0021895
GO:0050658	0.834	2	0.20055	0.93083	2	64	64	RNA transport	fbgn0014189,fbgn0001404
GO:0050657	0.834	2	0.20055	0.93083	2	64	64	nucleic acid transport	fbgn0014189,fbgn0001404
GO:0042302	1.501	3	0.20057	0.93083	3	146	149	structural constituent of cuticle	fbgn0005664,fbgn0035788,fbgn0004554
GO:0042065	0.217	1	0.201	0.931094	1	7	8	glial cell growth	fbgn0015269
GO:0051098	0.223	1	0.20186	0.931525	1	16	16	regulation of binding	fbgn0010278
GO:0019894	0.22	1	0.20212	0.931525	1	7	8	kinesin binding	fbgn0262872
GO:0051322	0.224	1	0.20224	0.931525	1	20	21	anaphase	fbgn0044324
GO:0090150	0.224	1	0.20238	0.931525	1	22	22	establishment of protein localization to membrane	fbgn0015298
GO:0010243	1.558	3	0.20256	0.931525	3	68	69	response to organonitrogen compound	fbgn0026379,fbgn0022382,fbgn0044047
GO:0005158	0.233	1	0.20299	0.932472	1	13	13	insulin receptor binding	fbgn0044047
GO:0035385	0.217	1	0.2048	0.933755	1	3	3	Roundabout signaling pathway	fbgn0264089
GO:0051236	0.848	2	0.20599	0.933755	2	65	65	establishment of RNA localization	fbgn0014189,fbgn0001404
GO:0000375	2.329	4	0.20624	0.933755	4	223	230	RNA splicing, via transesterification reactions	fbgn0014189,fbgn0036277,fbgn0003638,fbgn0021895
GO:0046626	0.885	2	0.20626	0.933755	2	16	16	regulation of insulin receptor signaling pathway	fbgn0263395,fbgn0026379
GO:0002683	0.847	2	0.20626	0.933755	2	43	43	negative regulation of immune system process	fbgn0014141,fbgn0020306
GO:1900076	0.885	2	0.20626	0.933755	2	16	16	regulation of cellular response to insulin stimulus	fbgn0263395,fbgn0026379
GO:0051258	0.229	1	0.2069	0.933904	1	19	19	protein polymerization	fbgn0038565
GO:0015368	0.222	1	0.20707	0.933904	1	7	8	calcium:cation antiporter activity	fbgn0037238
GO:0002218	0.223	1	0.20783	0.933904	1	6	6	activation of innate immune response	fbgn0033438
GO:0031290	0.868	2	0.20806	0.933904	2	11	11	retinal ganglion cell axon guidance	fbgn0000464,fbgn0015609
GO:0005484	0.231	1	0.20822	0.933904	1	24	24	SNAP receptor activity	fbgn0024980
GO:0035183	0.228	1	0.21082	0.941732	1	5	5	female germline ring canal inner rim	fbgn0014141
GO:0007283	1.587	3	0.21163	0.943528	3	106	151	spermatogenesis	fbgn0260775,fbgn0013678,fbgn0003079
GO:0030707	2.406	4	0.2125	0.943713	4	55	57	ovarian follicle cell development	fbgn0000636,fbgn0011656,fbgn0001404,fbgn0259176
GO:0051663	0.222	1	0.21266	0.943713	1	4	4	oocyte nucleus localization involved in oocyte dorsal/ventral axis specification	fbgn0263929
GO:0048232	1.593	3	0.21345	0.944564	3	107	152	male gamete generation	fbgn0260775,fbgn0013678,fbgn0003079
GO:0040015	0.234	1	0.21362	0.944564	1	9	9	negative regulation of multicellular organism growth	fbgn0026379
GO:0051053	0.232	1	0.21446	0.94484	1	13	13	negative regulation of DNA metabolic process	fbgn0011676
GO:0005743	0.819	2	0.21564	0.94484	2	55	56	mitochondrial inner membrane	fbgn0013674,fbgn0013675
GO:0000079	0.236	1	0.21583	0.94484	1	18	18	regulation of cyclin-dependent protein serine/threonine kinase activity	fbgn0040394
GO:0007382	0.224	1	0.21583	0.94484	1	2	2	specification of segmental identity, maxillary segment	fbgn0086655
GO:0010507	0.235	1	0.21589	0.94484	1	12	12	negative regulation of autophagy	fbgn0003079
GO:0050905	0.893	2	0.21593	0.94484	2	19	21	neuromuscular process	fbgn0023530,fbgn0005630
GO:0010181	0.237	1	0.21802	0.947561	1	11	11	FMN binding	fbgn0011676
GO:0035006	0.882	2	0.21805	0.947561	2	35	38	melanization defense response	fbgn0260632,fbgn0026379
GO:0042052	1.65	3	0.21812	0.947561	3	35	36	rhabdomere development	fbgn0026379,fbgn0000253,fbgn0265487
GO:0008380	2.388	4	0.21844	0.947561	4	230	237	RNA splicing	fbgn0014189,fbgn0036277,fbgn0003638,fbgn0021895
GO:0019992	0.883	2	0.21892	0.947561	2	24	25	diacylglycerol binding	fbgn0023081,fbgn0085413
GO:1901699	0.886	2	0.21894	0.947561	2	38	38	cellular response to nitrogen compound	fbgn0026379,fbgn0044047
GO:0034243	0.243	1	0.21952	0.947561	1	14	14	regulation of transcription elongation from RNA polymerase II promoter	fbgn0011656
GO:0051492	0.24	1	0.21994	0.947561	1	6	6	regulation of stress fiber assembly	fbgn0035761
GO:0035203	0.236	1	0.2203	0.947561	1	5	5	regulation of lamellocyte differentiation	fbgn0014141
GO:0045613	0.236	1	0.2203	0.947561	1	5	5	regulation of plasmatocyte differentiation	fbgn0014141
GO:0032008	0.234	1	0.2215	0.948493	1	8	9	positive regulation of TOR signaling	fbgn0263395
GO:0005778	0.247	1	0.22238	0.948493	1	13	15	peroxisomal membrane	fbgn0263782
GO:0031903	0.247	1	0.22238	0.948493	1	13	15	microbody membrane	fbgn0263782
GO:0007259	0.248	1	0.22256	0.948493	1	12	12	JAK-STAT cascade	fbgn0010382
GO:0000137	0.241	1	0.22332	0.948493	1	8	8	Golgi cis cisterna	fbgn0264561
GO:0050662	1.629	3	0.22422	0.951232	3	129	131	coenzyme binding	fbgn0011676,fbgn0025628,fbgn0263782
GO:0005819	0.903	2	0.22453	0.951581	2	48	51	spindle	fbgn0044324,fbgn0000253
GO:0005762	0.256	1	0.22726	0.958289	1	49	49	mitochondrial large ribosomal subunit	fbgn0013686
GO:0000315	0.256	1	0.22726	0.958289	1	49	49	organellar large ribosomal subunit	fbgn0013686
GO:0090136	0.251	1	0.22876	0.959931	1	6	6	epithelial cell-cell adhesion	fbgn0001404
GO:0080134	4.993	7	0.22921	0.960678	7	192	198	regulation of response to stress	fbgn0260632,fbgn0033438,fbgn0263395,fbgn0026379,fbgn0011274,fbgn0000253,fbgn0003079
GO:0007419	1.668	3	0.22987	0.961263	3	37	37	ventral cord development	fbgn0260632,fbgn0085424,fbgn0033159
GO:0016568	1.658	3	0.23013	0.961263	3	133	135	chromatin modification	fbgn0261823,fbgn0014189,fbgn0005624
GO:1901698	1.661	3	0.23024	0.961263	3	76	77	response to nitrogen compound	fbgn0026379,fbgn0022382,fbgn0044047
GO:0002810	0.254	1	0.23057	0.961263	1	8	8	regulation of antifungal peptide biosynthetic process	fbgn0011274
GO:0006967	0.254	1	0.23057	0.961263	1	8	8	positive regulation of antifungal peptide biosynthetic process	fbgn0011274
GO:0007631	1.683	3	0.23125	0.961263	3	33	37	feeding behavior	fbgn0050361,fbgn0040726,fbgn0003435
GO:0019751	0.26	1	0.23134	0.961263	1	16	16	polyol metabolic process	fbgn0026379
GO:0006582	0.918	2	0.23174	0.961263	2	39	42	melanin metabolic process	fbgn0260632,fbgn0026379
GO:0016337	5.927	8	0.23231	0.961263	8	81	84	cell-cell adhesion	fbgn0262018,fbgn0000636,fbgn0028645,fbgn0024836,fbgn0001404,fbgn0029082,fbgn0028369,fbgn0015609
GO:0032093	0.234	1	0.23257	0.961263	1	2	2	SAM domain binding	fbgn0000464
GO:0019866	0.88	2	0.23292	0.961263	2	60	61	organelle inner membrane	fbgn0013674,fbgn0013675
GO:0002253	0.255	1	0.23361	0.961263	1	9	9	activation of immune response	fbgn0033438
GO:0016198	2.531	4	0.23434	0.961263	4	29	30	axon choice point recognition	fbgn0028645,fbgn0264442,fbgn0005630,fbgn0264089
GO:0006508	9.343	12	0.23463	0.961263	12	655	668	proteolysis	fbgn0033362,fbgn0033363,fbgn0033365,fbgn0033438,fbgn0030521,fbgn0053462,fbgn0053461,fbgn0004509,fbgn0033192,fbgn0032303,fbgn0003319,fbgn0259175
GO:0007162	0.262	1	0.23525	0.961263	1	9	10	negative regulation of cell adhesion	fbgn0026379
GO:0043566	0.266	1	0.23547	0.961263	1	32	45	structure-specific DNA binding	fbgn0010278
GO:0016788	7.671	10	0.23555	0.961263	10	442	476	hydrolase activity, acting on ester bonds	fbgn0001987,fbgn0024740,fbgn0032032,fbgn0000464,fbgn0026379,fbgn0261548,fbgn0264815,fbgn0023496,fbgn0015544,fbgn0037090
GO:0005952	0.262	1	0.2358	0.961263	1	6	6	cAMP-dependent protein kinase complex	fbgn0022382
GO:0004559	0.285	1	0.23594	0.961263	1	14	14	alpha-mannosidase activity	fbgn0031716
GO:0015081	2.467	4	0.23631	0.961263	4	119	125	sodium ion transmembrane transporter activity	fbgn0262476,fbgn0037238,fbgn0038691,fbgn0034911
GO:0042067	1.701	3	0.23661	0.961263	3	29	31	establishment of ommatidial planar polarity	fbgn0024836,fbgn0029082,fbgn0003090
GO:0044428	11.243	14	0.2372	0.961263	14	928	963	nuclear part	fbgn0261823,fbgn0032816,fbgn0086655,fbgn0010382,fbgn0014189,fbgn0036277,fbgn0004858,fbgn0020306,fbgn0003638,fbgn0014075,fbgn0010278,fbgn0005624,fbgn0021895,fbgn0033166
GO:0045746	1.709	3	0.2376	0.961263	3	38	39	negative regulation of Notch signaling pathway	fbgn0024836,fbgn0003090,fbgn0259176
GO:0030182	2.526	4	0.23763	0.961263	4	58	69	neuron differentiation	fbgn0029082,fbgn0265487,fbgn0259176,fbgn0264089
GO:0015923	0.288	1	0.23774	0.961263	1	15	15	mannosidase activity	fbgn0031716
GO:0005605	0.259	1	0.24066	0.968899	1	5	5	basal lamina	fbgn0261563
GO:0005099	1.718	3	0.24103	0.968899	3	56	58	Ras GTPase activator activity	fbgn0036518,fbgn0015269,fbgn0051935
GO:0002788	0.268	1	0.24132	0.968899	1	9	9	regulation of antifungal peptide production	fbgn0011274
GO:1900150	0.268	1	0.24132	0.968899	1	9	9	regulation of defense response to fungus	fbgn0011274
GO:0048753	0.269	1	0.24178	0.969001	1	14	14	pigment granule organization	fbgn0036105
GO:0006720	0.277	1	0.24286	0.972228	1	19	19	isoprenoid metabolic process	fbgn0263782
GO:0044431	1.724	3	0.24378	0.972228	3	93	93	Golgi apparatus part	fbgn0264561,fbgn0032361,fbgn0004509
GO:0045434	0.279	1	0.24466	0.973968	1	16	16	negative regulation of female receptivity, post-mating	fbgn0001404
GO:0045678	0.272	1	0.24522	0.97444	1	7	7	positive regulation of R7 cell differentiation	fbgn0032816
GO:0030674	0.969	2	0.24715	0.980276	2	24	25	protein binding, bridging	fbgn0259745,fbgn0262872
GO:0035002	0.278	1	0.24891	0.982058	1	11	12	liquid clearance, open tracheal system	fbgn0031571
GO:0031347	1.731	3	0.24948	0.984032	3	98	103	regulation of defense response	fbgn0260632,fbgn0033438,fbgn0011274
GO:0045597	1.772	3	0.25066	0.986171	3	34	35	positive regulation of cell differentiation	fbgn0032816,fbgn0003079,fbgn0259176
GO:0012501	4.278	6	0.25075	0.986171	6	145	147	programmed cell death	fbgn0030521,fbgn0263395,fbgn0026379,fbgn0265487,fbgn0005630,fbgn0259176
GO:0002164	0.982	2	0.25357	0.990746	2	33	35	larval development	fbgn0026379,fbgn0003079
GO:0008406	2.576	4	0.25384	0.990746	4	49	60	gonad development	fbgn0261563,fbgn0005630,fbgn0263782,fbgn0264089
GO:0035098	0.274	1	0.25392	0.990746	1	9	10	ESC/E(Z) complex	fbgn0086655
GO:0033227	0.291	1	0.25456	0.990746	1	26	26	dsRNA transport	fbgn0001404
GO:0045035	0.283	1	0.25501	0.990746	1	10	10	sensory organ precursor cell division	fbgn0010382
GO:0000082	0.285	1	0.25512	0.990746	1	13	14	G1/S transition of mitotic cell cycle	fbgn0010382
GO:0044843	0.285	1	0.25512	0.990746	1	13	14	cell cycle G1/S phase transition	fbgn0010382
GO:0022403	0.294	1	0.25672	0.990746	1	28	29	cell cycle phase	fbgn0044324
GO:0032783	0.272	1	0.25682	0.990746	1	8	8	ELL-EAF complex	fbgn0033166
GO:0043065	0.985	2	0.2569	0.990746	2	24	24	positive regulation of apoptotic process	fbgn0010382,fbgn0263395
GO:0006120	0.293	1	0.25692	0.990746	1	32	33	mitochondrial electron transport, NADH to ubiquinone	fbgn0262952
GO:0051532	0.295	1	0.25719	0.990746	1	16	16	regulation of NFAT protein import into nucleus	fbgn0000253
GO:0051533	0.295	1	0.25719	0.990746	1	16	16	positive regulation of NFAT protein import into nucleus	fbgn0000253
GO:0008302	0.284	1	0.25855	0.993685	1	3	3	female germline ring canal formation, actin assembly	fbgn0014141
GO:0007279	0.296	1	0.25893	0.993685	1	19	28	pole cell formation	fbgn0013686
GO:0035010	0.989	2	0.25895	0.993685	2	36	38	encapsulation of foreign target	fbgn0028541,fbgn0026379
GO:0016461	0.294	1	0.25929	0.993685	1	10	10	unconventional myosin complex	fbgn0000253
GO:0005057	1.779	3	0.25936	0.993685	3	48	49	receptor signaling protein activity	fbgn0024836,fbgn0263395,fbgn0003079
GO:0015931	0.991	2	0.25974	0.993685	2	76	76	nucleobase-containing compound transport	fbgn0014189,fbgn0001404
GO:0007307	0.294	1	0.25989	0.993685	1	19	21	eggshell chorion gene amplification	fbgn0010382
GO:0032784	0.297	1	0.26052	0.993685	1	19	19	regulation of DNA-templated transcription, elongation	fbgn0011656
GO:0005416	0.297	1	0.26058	0.993685	1	12	13	cation:amino acid symporter activity	fbgn0034911
GO:0033500	0.294	1	0.26124	0.993685	1	11	11	carbohydrate homeostasis	fbgn0015721
GO:0008219	4.337	6	0.26128	0.993685	6	151	153	cell death	fbgn0030521,fbgn0263395,fbgn0026379,fbgn0265487,fbgn0005630,fbgn0259176
GO:0035070	0.294	1	0.26245	0.996352	1	10	10	salivary gland histolysis	fbgn0011274
GO:0006302	0.305	1	0.26439	1	1	32	36	double-strand break repair	fbgn0002891
GO:0016758	2.602	4	0.26504	1	4	148	148	transferase activity, transferring hexosyl groups	fbgn0035401,fbgn0027560,fbgn0001404,fbgn0014075
GO:0022891	14.263	17	0.26555	1	17	646	661	substrate-specific transmembrane transporter activity	fbgn0262476,fbgn0035400,fbgn0265194,fbgn0028875,fbgn0037238,fbgn0038691,fbgn0032593,fbgn0015872,fbgn0013672,fbgn0013673,fbgn0013674,fbgn0013675,fbgn0013676,fbgn0013678,fbgn0050394,fbgn0050277,fbgn0034911
GO:0006277	0.303	1	0.26652	1	1	21	23	DNA amplification	fbgn0010382
GO:0001738	1.006	2	0.26691	1	2	16	16	morphogenesis of a polarized epithelium	fbgn0024836,fbgn0003090
GO:0005975	4.329	6	0.26903	1	6	275	277	carbohydrate metabolic process	fbgn0027560,fbgn0020236,fbgn0032598,fbgn0026379,fbgn0014075,fbgn0034356
GO:0044439	0.309	1	0.26936	1	1	20	22	peroxisomal part	fbgn0263782
GO:0044438	0.309	1	0.26936	1	1	20	22	microbody part	fbgn0263782
GO:0042181	0.309	1	0.27	1	1	22	22	ketone biosynthetic process	fbgn0028375
GO:0032434	0.307	1	0.27001	1	1	14	14	regulation of proteasomal ubiquitin-dependent protein catabolic process	fbgn0010382
GO:0016020	31.507	35	0.27004	1	35	1024	1056	membrane	fbgn0001987,fbgn0262476,fbgn0035400,fbgn0024980,fbgn0001992,fbgn0262018,fbgn0000636,fbgn0024836,fbgn0264561,fbgn0260775,fbgn0033438,fbgn0000464,fbgn0031600,fbgn0029082,fbgn0004509,fbgn0033192,fbgn0040726,fbgn0003090,fbgn0028375,fbgn0013674,fbgn0013675,fbgn0013676,fbgn0013678,fbgn0013679,fbgn0028369,fbgn0265002,fbgn0015609,fbgn0050277,fbgn0031571,fbgn0263782,fbgn0003319,fbgn0031689,fbgn0259175,fbg…
GO:0007200	0.299	1	0.27099	1	1	5	5	phospholipase C-activating G-protein coupled receptor signaling pathway	fbgn0050361
GO:0061136	0.309	1	0.27163	1	1	15	15	regulation of proteasomal protein catabolic process	fbgn0010382
GO:0035073	0.31	1	0.27173	1	1	15	15	pupariation	fbgn0001189
GO:0034765	0.309	1	0.27321	1	1	9	9	regulation of ion transmembrane transport	fbgn0000253
GO:0034762	0.309	1	0.27321	1	1	9	9	regulation of transmembrane transport	fbgn0000253
GO:0040036	0.308	1	0.27406	1	1	6	6	regulation of fibroblast growth factor receptor signaling pathway	fbgn0033438
GO:0032027	0.314	1	0.27471	1	1	14	14	myosin light chain binding	fbgn0037836
GO:0016051	1.034	2	0.27622	1	2	41	41	carbohydrate biosynthetic process	fbgn0027560,fbgn0034356
GO:0015491	0.311	1	0.27664	1	1	11	12	cation:cation antiporter activity	fbgn0037238
GO:1901700	6.198	8	0.27718	1	8	197	215	response to oxygen-containing compound	fbgn0014141,fbgn0001189,fbgn0263395,fbgn0026379,fbgn0022382,fbgn0266450,fbgn0015721,fbgn0044047
GO:0051235	1.838	3	0.27746	1	3	71	74	maintenance of location	fbgn0011656,fbgn0026379,fbgn0003090
GO:0006406	0.317	1	0.2777	1	1	24	24	mRNA export from nucleus	fbgn0014189
GO:0000152	0.321	1	0.27772	1	1	35	35	nuclear ubiquitin ligase complex	fbgn0005624
GO:0044769	0.326	1	0.27787	1	1	26	27	ATPase activity, coupled to transmembrane movement of ions, rotational mechanism	fbgn0013672
GO:0008138	0.323	1	0.27872	1	1	21	21	protein tyrosine/serine/threonine phosphatase activity	fbgn0026379
GO:0050795	2.691	4	0.28033	1	4	67	74	regulation of behavior	fbgn0000464,fbgn0001404,fbgn0015872,fbgn0015609
GO:0030529	5.31	7	0.28057	1	7	514	618	ribonucleoprotein complex	fbgn0014189,fbgn0036277,fbgn0013686,fbgn0015298,fbgn0003638,fbgn0021895,fbgn0003435
GO:0050832	1.058	2	0.28083	1	2	51	52	defense response to fungus	fbgn0011274,fbgn0261565
GO:0001751	1.871	3	0.28139	1	3	41	43	compound eye photoreceptor cell differentiation	fbgn0029082,fbgn0265487,fbgn0259176
GO:0030516	1.048	2	0.28183	1	2	9	9	regulation of axon extension	fbgn0000464,fbgn0015609
GO:0061387	1.048	2	0.28183	1	2	9	9	regulation of extent of cell growth	fbgn0000464,fbgn0015609
GO:0045924	1.064	2	0.28192	1	2	30	32	regulation of female receptivity	fbgn0001404,fbgn0265487
GO:0007369	1.045	2	0.28221	1	2	32	36	gastrulation	fbgn0260632,fbgn0003079
GO:0007400	1.053	2	0.28291	1	2	27	27	neuroblast fate determination	fbgn0010382,fbgn0085424
GO:0016831	0.334	1	0.28311	1	1	23	24	carboxy-lyase activity	fbgn0034356
GO:0035202	0.312	1	0.28324	1	1	4	4	tracheal pit formation in open tracheal system	fbgn0033438
GO:0042579	1.057	2	0.2838	1	2	76	78	microbody	fbgn0011676,fbgn0263782
GO:0003151	0.315	1	0.28447	1	1	4	4	outflow tract morphogenesis	fbgn0264089
GO:0000149	0.329	1	0.28492	1	1	25	25	SNARE binding	fbgn0024980
GO:0045087	1.868	3	0.28532	1	3	82	85	innate immune response	fbgn0260632,fbgn0026379,fbgn0011274
GO:0005920	0.32	1	0.28652	1	1	6	6	smooth septate junction	fbgn0000636
GO:0031966	1.054	2	0.28664	1	2	79	81	mitochondrial membrane	fbgn0013674,fbgn0013675
GO:0001764	0.318	1	0.28671	1	1	5	5	neuron migration	fbgn0264089
GO:0051017	1.068	2	0.28764	1	2	21	21	actin filament bundle assembly	fbgn0263929,fbgn0003319
GO:0009620	1.076	2	0.28765	1	2	53	54	response to fungus	fbgn0011274,fbgn0261565
GO:0016485	9.855	12	0.28785	1	12	683	697	protein processing	fbgn0033362,fbgn0033363,fbgn0033365,fbgn0033438,fbgn0030521,fbgn0053462,fbgn0053461,fbgn0004509,fbgn0033192,fbgn0032303,fbgn0003319,fbgn0259175
GO:0060284	8.123	10	0.28791	1	10	179	188	regulation of cell development	fbgn0032816,fbgn0024836,fbgn0000464,fbgn0026379,fbgn0266450,fbgn0003079,fbgn0015609,fbgn0033159,fbgn0021764,fbgn0259176
GO:0046716	1.894	3	0.2885	1	3	28	29	muscle cell cellular homeostasis	fbgn0000253,fbgn0013672,fbgn0265487
GO:0043167	48.24	52	0.2888	1	52	2269	2324	ion binding	fbgn0259745,fbgn0011676,fbgn0052091,fbgn0032815,fbgn0005664,fbgn0032817,fbgn0030973,fbgn0053196,fbgn0010575,fbgn0023081,fbgn0001992,fbgn0262018,fbgn0086655,fbgn0020236,fbgn0024836,fbgn0028875,fbgn0264442,fbgn0014189,fbgn0025628,fbgn0038565,fbgn0033438,fbgn0040765,fbgn0025186,fbgn0031855,fbgn0263395,fbgn0026379,fbgn0004858,fbgn0020306,fbgn0000253,fbgn0036104,fbgn0003090,fbgn0261565,fbgn0013674,fbg…
GO:0019706	0.348	1	0.28898	1	1	22	22	protein-cysteine S-palmitoyltransferase activity	fbgn0260941
GO:0019707	0.348	1	0.28898	1	1	22	22	protein-cysteine S-acyltransferase activity	fbgn0260941
GO:0046008	0.353	1	0.28924	1	1	22	23	regulation of female receptivity, post-mating	fbgn0001404
GO:0018345	0.348	1	0.28929	1	1	22	22	protein palmitoylation	fbgn0260941
GO:0055088	1.067	2	0.28937	1	2	31	31	lipid homeostasis	fbgn0263395,fbgn0015721
GO:0061572	1.073	2	0.28988	1	2	22	22	actin filament bundle organization	fbgn0263929,fbgn0003319
GO:0006405	0.334	1	0.28995	1	1	27	27	RNA export from nucleus	fbgn0014189
GO:0034220	2.722	4	0.29128	1	4	125	127	ion transmembrane transport	fbgn0032593,fbgn0013672,fbgn0013673,fbgn0050394
GO:0045861	0.349	1	0.29149	1	1	26	26	negative regulation of proteolysis	fbgn0010382
GO:0017111	9.021	11	0.29183	1	11	529	551	nucleoside-triphosphatase activity	fbgn0052091,fbgn0034106,fbgn0014189,fbgn0038565,fbgn0038691,fbgn0020306,fbgn0036104,fbgn0013672,fbgn0013673,fbgn0010549,fbgn0031449
GO:0007561	0.331	1	0.29218	1	1	8	8	imaginal disc eversion	fbgn0033438
GO:0016877	0.343	1	0.29284	1	1	22	22	ligase activity, forming carbon-sulfur bonds	fbgn0020236
GO:0000139	0.341	1	0.29396	1	1	23	23	Golgi membrane	fbgn0264561
GO:1902275	0.344	1	0.29462	1	1	29	30	regulation of chromatin organization	fbgn0010278
GO:0022409	0.33	1	0.29498	1	1	8	8	positive regulation of cell-cell adhesion	fbgn0264089
GO:0007621	0.346	1	0.29535	1	1	18	19	negative regulation of female receptivity	fbgn0001404
GO:0004197	0.347	1	0.2956	1	1	25	29	cysteine-type endopeptidase activity	fbgn0030521
GO:0030863	0.336	1	0.2957	1	1	6	6	cortical cytoskeleton	fbgn0262483
GO:0048512	2.764	4	0.29665	1	4	73	76	circadian behavior	fbgn0011656,fbgn0015269,fbgn0038693,fbgn0022382
GO:1901654	1.085	2	0.2972	1	2	31	34	response to ketone	fbgn0001189,fbgn0266450
GO:0035075	1.085	2	0.2972	1	2	31	34	response to ecdysone	fbgn0001189,fbgn0266450
GO:0036314	1.085	2	0.2972	1	2	31	34	response to sterol	fbgn0001189,fbgn0266450
GO:0030165	0.334	1	0.2981	1	1	7	7	PDZ domain binding	fbgn0026379
GO:0007099	0.35	1	0.29837	1	1	24	24	centriole replication	fbgn0000253
GO:0098534	0.35	1	0.29837	1	1	24	24	centriole assembly	fbgn0000253
GO:0016462	9.077	11	0.29889	1	11	538	561	pyrophosphatase activity	fbgn0052091,fbgn0034106,fbgn0014189,fbgn0038565,fbgn0038691,fbgn0020306,fbgn0036104,fbgn0013672,fbgn0013673,fbgn0010549,fbgn0031449
GO:0070050	0.342	1	0.29962	1	1	12	12	neuron cellular homeostasis	fbgn0013672
GO:0044425	41.579	45	0.3002	1	45	1733	1764	membrane part	fbgn0262476,fbgn0035400,fbgn0035763,fbgn0052091,fbgn0028541,fbgn0024980,fbgn0029507,fbgn0050361,fbgn0265194,fbgn0262018,fbgn0000636,fbgn0028645,fbgn0024836,fbgn0050389,fbgn0028875,fbgn0264561,fbgn0262952,fbgn0037238,fbgn0000464,fbgn0001404,fbgn0038691,fbgn0032593,fbgn0029082,fbgn0015872,fbgn0004509,fbgn0013683,fbgn0013684,fbgn0013685,fbgn0013681,fbgn0040726,fbgn0028375,fbgn0013672,fbgn0013673,fbg…
GO:0051604	9.97	12	0.30056	1	12	686	700	protein maturation	fbgn0033362,fbgn0033363,fbgn0033365,fbgn0033438,fbgn0030521,fbgn0053462,fbgn0053461,fbgn0004509,fbgn0033192,fbgn0032303,fbgn0003319,fbgn0259175
GO:0048665	0.351	1	0.30106	1	1	12	13	neuron fate specification	fbgn0010382
GO:0042981	3.667	5	0.30114	1	5	130	137	regulation of apoptotic process	fbgn0032816,fbgn0010382,fbgn0263395,fbgn0003079,fbgn0259176
GO:1990138	2.803	4	0.30123	1	4	27	27	neuron projection extension	fbgn0262018,fbgn0000464,fbgn0015609,fbgn0033159
GO:0048675	2.803	4	0.30123	1	4	27	27	axon extension	fbgn0262018,fbgn0000464,fbgn0015609,fbgn0033159
GO:0042043	0.341	1	0.30143	1	1	4	4	neurexin family protein binding	fbgn0051146
GO:0080135	2.789	4	0.3025	1	4	84	85	regulation of cellular response to stress	fbgn0263395,fbgn0026379,fbgn0000253,fbgn0003079
GO:0006418	0.363	1	0.30283	1	1	38	39	tRNA aminoacylation for protein translation	fbgn0027094
GO:0043039	0.363	1	0.30283	1	1	38	39	tRNA aminoacylation	fbgn0027094
GO:0005705	0.363	1	0.30327	1	1	34	34	polytene chromosome interband	fbgn0044324
GO:0016876	0.364	1	0.3035	1	1	39	40	ligase activity, forming aminoacyl-tRNA and related compounds	fbgn0027094
GO:0016875	0.364	1	0.3035	1	1	39	40	ligase activity, forming carbon-oxygen bonds	fbgn0027094
GO:0004812	0.364	1	0.3035	1	1	39	40	aminoacyl-tRNA ligase activity	fbgn0027094
GO:0016818	9.126	11	0.30507	1	11	545	568	hydrolase activity, acting on acid anhydrides, in phosphorus-containing anhydrides	fbgn0052091,fbgn0034106,fbgn0014189,fbgn0038565,fbgn0038691,fbgn0020306,fbgn0036104,fbgn0013672,fbgn0013673,fbgn0010549,fbgn0031449
GO:0016335	0.349	1	0.30634	1	1	7	7	morphogenesis of larval imaginal disc epithelium	fbgn0003319
GO:0048101	0.307	1	0.30706	1	1	1	1	calcium- and calmodulin-regulated 3',5'-cyclic-GMP phosphodiesterase activity	fbgn0264815
GO:0004117	0.307	1	0.30706	1	1	1	1	calmodulin-dependent cyclic-nucleotide phosphodiesterase activity	fbgn0264815
GO:0042307	0.365	1	0.30882	1	1	19	19	positive regulation of protein import into nucleus	fbgn0000253
GO:0042993	0.365	1	0.30882	1	1	19	19	positive regulation of transcription factor import into nucleus	fbgn0000253
GO:0018958	1.122	2	0.3095	1	2	50	54	phenol-containing compound metabolic process	fbgn0260632,fbgn0026379
GO:0045611	0.355	1	0.30973	1	1	9	9	negative regulation of hemocyte differentiation	fbgn0014141
GO:0097305	3.704	5	0.31041	1	5	95	112	response to alcohol	fbgn0014141,fbgn0001189,fbgn0263395,fbgn0022382,fbgn0266450
GO:0040005	0.327	1	0.31144	1	1	3	3	chitin-based cuticle attachment to epithelium	fbgn0053196
GO:0016817	9.182	11	0.31255	1	11	549	572	hydrolase activity, acting on acid anhydrides	fbgn0052091,fbgn0034106,fbgn0014189,fbgn0038565,fbgn0038691,fbgn0020306,fbgn0036104,fbgn0013672,fbgn0013673,fbgn0010549,fbgn0031449
GO:0009312	0.381	1	0.31267	1	1	16	16	oligosaccharide biosynthetic process	fbgn0027560
GO:0005814	0.368	1	0.31315	1	1	21	21	centriole	fbgn0000253
GO:0031396	0.369	1	0.31321	1	1	19	19	regulation of protein ubiquitination	fbgn0010382
GO:0030173	0.327	1	0.31334	1	1	5	5	integral component of Golgi membrane	fbgn0004509
GO:0008046	0.354	1	0.31491	1	1	3	4	axon guidance receptor activity	fbgn0033159
GO:0051647	0.358	1	0.315	1	1	7	7	nucleus localization	fbgn0263929
GO:0010038	0.38	1	0.31686	1	1	24	24	response to metal ion	fbgn0000253
GO:0010955	0.39	1	0.31833	1	1	28	28	negative regulation of protein processing	fbgn0010382
GO:0006310	0.386	1	0.31867	1	1	46	49	DNA recombination	fbgn0002891
GO:0006814	1.15	2	0.31933	1	2	56	57	sodium ion transport	fbgn0037238,fbgn0038691
GO:0022618	0.382	1	0.31954	1	1	41	41	ribonucleoprotein complex assembly	fbgn0034915
GO:0043038	0.388	1	0.32054	1	1	39	40	amino acid activation	fbgn0027094
GO:0045297	0.418	1	0.32075	1	1	29	30	post-mating behavior	fbgn0001404
GO:0051336	2.865	4	0.32113	1	4	115	117	regulation of hydrolase activity	fbgn0261823,fbgn0029082,fbgn0013672,fbgn0051935
GO:0008340	3.77	5	0.32201	1	5	149	151	determination of adult lifespan	fbgn0014141,fbgn0015269,fbgn0013672,fbgn0003435,fbgn0259176
GO:0007088	1.158	2	0.32208	1	2	62	63	regulation of mitosis	fbgn0010382,fbgn0044324
GO:0007220	0.364	1	0.32299	1	1	14	14	Notch receptor processing	fbgn0029082
GO:0019955	0.372	1	0.32374	1	1	6	6	cytokine binding	fbgn0260632
GO:0001754	2.017	3	0.32407	1	3	45	55	eye photoreceptor cell differentiation	fbgn0029082,fbgn0265487,fbgn0259176
GO:0000792	0.387	1	0.32428	1	1	29	30	heterochromatin	fbgn0005624
GO:0016241	0.381	1	0.32473	1	1	14	14	regulation of macroautophagy	fbgn0003079
GO:0072347	0.379	1	0.32559	1	1	9	15	response to anesthetic	fbgn0038693
GO:0032006	0.375	1	0.32631	1	1	13	15	regulation of TOR signaling	fbgn0263395
GO:0007622	2.892	4	0.3264	1	4	75	78	rhythmic behavior	fbgn0011656,fbgn0015269,fbgn0038693,fbgn0022382
GO:0007155	10.272	12	0.32684	1	12	194	202	cell adhesion	fbgn0001987,fbgn0262018,fbgn0000636,fbgn0028645,fbgn0024836,fbgn0010382,fbgn0000464,fbgn0001404,fbgn0029082,fbgn0026379,fbgn0028369,fbgn0015609
GO:0010941	4.707	6	0.32907	1	6	167	189	regulation of cell death	fbgn0032816,fbgn0010382,fbgn0263395,fbgn0003079,fbgn0262579,fbgn0259176
GO:0010639	1.172	2	0.32966	1	2	60	64	negative regulation of organelle organization	fbgn0010382,fbgn0044324
GO:0042176	0.393	1	0.32994	1	1	28	28	regulation of protein catabolic process	fbgn0010382
GO:0008069	0.382	1	0.32998	1	1	10	10	dorsal/ventral axis specification, ovarian follicular epithelium	fbgn0003079
GO:0022892	14.959	17	0.3306	1	17	696	712	substrate-specific transporter activity	fbgn0262476,fbgn0035400,fbgn0265194,fbgn0028875,fbgn0037238,fbgn0038691,fbgn0032593,fbgn0015872,fbgn0013672,fbgn0013673,fbgn0013674,fbgn0013675,fbgn0013676,fbgn0013678,fbgn0050394,fbgn0050277,fbgn0034911
GO:0030708	0.388	1	0.33177	1	1	10	10	germarium-derived female germ-line cyst encapsulation	fbgn0014141
GO:0035309	0.385	1	0.33249	1	1	6	6	wing and notum subfield formation	fbgn0003079
GO:0015075	13.092	15	0.33294	1	15	574	589	ion transmembrane transporter activity	fbgn0262476,fbgn0265194,fbgn0028875,fbgn0037238,fbgn0038691,fbgn0032593,fbgn0013672,fbgn0013673,fbgn0013674,fbgn0013675,fbgn0013676,fbgn0013678,fbgn0050394,fbgn0050277,fbgn0034911
GO:2000274	0.385	1	0.33395	1	1	8	8	regulation of epithelial cell migration, open tracheal system	fbgn0264089
GO:0035214	0.398	1	0.33474	1	1	14	20	eye-antennal disc development	fbgn0004858
GO:0016757	2.923	4	0.33536	1	4	170	171	transferase activity, transferring glycosyl groups	fbgn0035401,fbgn0027560,fbgn0001404,fbgn0014075
GO:0015171	1.193	2	0.33572	1	2	54	55	amino acid transmembrane transporter activity	fbgn0050394,fbgn0034911
GO:0004527	0.403	1	0.33636	1	1	35	36	exonuclease activity	fbgn0261548
GO:0045454	0.417	1	0.33645	1	1	49	49	cell redox homeostasis	fbgn0025628
GO:0008094	0.408	1	0.33797	1	1	38	39	DNA-dependent ATPase activity	fbgn0020306
GO:0007052	2.064	3	0.33926	1	3	194	196	mitotic spindle organization	fbgn0014189,fbgn0044324,fbgn0000253
GO:0061343	0.403	1	0.34008	1	1	12	12	cell adhesion involved in heart morphogenesis	fbgn0001987
GO:0022610	10.38	12	0.3403	1	12	206	217	biological adhesion	fbgn0001987,fbgn0262018,fbgn0000636,fbgn0028645,fbgn0024836,fbgn0010382,fbgn0000464,fbgn0001404,fbgn0029082,fbgn0026379,fbgn0028369,fbgn0015609
GO:0016318	2.062	3	0.34042	1	3	28	28	ommatidial rotation	fbgn0262018,fbgn0024836,fbgn0015609
GO:0007469	0.401	1	0.34101	1	1	10	10	antennal development	fbgn0261823
GO:0016830	0.418	1	0.34153	1	1	31	33	carbon-carbon lyase activity	fbgn0034356
GO:0000790	0.413	1	0.34343	1	1	27	29	nuclear chromatin	fbgn0005624
GO:0046824	0.416	1	0.34346	1	1	22	22	positive regulation of nucleocytoplasmic transport	fbgn0000253
GO:0033044	0.415	1	0.34407	1	1	34	35	regulation of chromosome organization	fbgn0010278
GO:0009117	4.784	6	0.3444	1	6	185	189	nucleotide metabolic process	fbgn0038565,fbgn0264815,fbgn0013672,fbgn0013673,fbgn0022709,fbgn0263782
GO:0035220	2.08	3	0.34479	1	3	82	86	wing disc development	fbgn0085424,fbgn0004858,fbgn0003319
GO:0002252	1.214	2	0.34503	1	2	51	53	immune effector process	fbgn0028541,fbgn0026379
GO:0006816	1.211	2	0.34517	1	2	31	33	calcium ion transport	fbgn0037238,fbgn0032593
GO:0016417	0.436	1	0.34637	1	1	28	28	S-acyltransferase activity	fbgn0260941
GO:0001737	1.214	2	0.3464	1	2	23	23	establishment of imaginal disc-derived wing hair orientation	fbgn0003090,fbgn0260941
GO:0006753	4.796	6	0.34663	1	6	188	192	nucleoside phosphate metabolic process	fbgn0038565,fbgn0264815,fbgn0013672,fbgn0013673,fbgn0022709,fbgn0263782
GO:2001234	0.394	1	0.3468	1	1	4	4	negative regulation of apoptotic signaling pathway	fbgn0003079
GO:0016081	0.415	1	0.34731	1	1	23	23	synaptic vesicle docking involved in exocytosis	fbgn0024980
GO:0051276	4.796	6	0.34818	1	6	323	462	chromosome organization	fbgn0261823,fbgn0014189,fbgn0044324,fbgn0020306,fbgn0000253,fbgn0005624
GO:0016298	1.236	2	0.3487	1	2	83	90	lipase activity	fbgn0024740,fbgn0023496
GO:0008047	2.988	4	0.34876	1	4	105	107	enzyme activator activity	fbgn0261823,fbgn0036518,fbgn0015269,fbgn0051935
GO:0051539	0.384	1	0.34923	1	1	18	18	4 iron, 4 sulfur cluster binding	fbgn0053196
GO:0061025	0.425	1	0.34953	1	1	38	40	membrane fusion	fbgn0024980
GO:1900373	0.418	1	0.34987	1	1	10	10	positive regulation of purine nucleotide biosynthetic process	fbgn0015269
GO:0045762	0.418	1	0.34987	1	1	10	10	positive regulation of adenylate cyclase activity	fbgn0015269
GO:0030819	0.418	1	0.34987	1	1	10	10	positive regulation of cAMP biosynthetic process	fbgn0015269
GO:0030810	0.418	1	0.34987	1	1	10	10	positive regulation of nucleotide biosynthetic process	fbgn0015269
GO:0030816	0.418	1	0.34987	1	1	10	10	positive regulation of cAMP metabolic process	fbgn0015269
GO:0030801	0.418	1	0.34987	1	1	10	10	positive regulation of cyclic nucleotide metabolic process	fbgn0015269
GO:0030804	0.418	1	0.34987	1	1	10	10	positive regulation of cyclic nucleotide biosynthetic process	fbgn0015269
GO:0031281	0.418	1	0.34987	1	1	10	10	positive regulation of cyclase activity	fbgn0015269
GO:0045981	0.418	1	0.34987	1	1	10	10	positive regulation of nucleotide metabolic process	fbgn0015269
GO:1900544	0.418	1	0.34987	1	1	10	10	positive regulation of purine nucleotide metabolic process	fbgn0015269
GO:0015298	0.415	1	0.35005	1	1	14	15	solute:cation antiporter activity	fbgn0037238
GO:0034248	1.228	2	0.35017	1	2	42	46	regulation of cellular amide metabolic process	fbgn0260632,fbgn0011274
GO:0002805	1.228	2	0.35017	1	2	42	46	regulation of antimicrobial peptide biosynthetic process	fbgn0260632,fbgn0011274
GO:0055076	0.426	1	0.3503	1	1	23	23	transition metal ion homeostasis	fbgn0265194
GO:0060147	0.379	1	0.35077	1	1	5	5	regulation of posttranscriptional gene silencing	fbgn0020306
GO:0060148	0.379	1	0.35077	1	1	5	5	positive regulation of posttranscriptional gene silencing	fbgn0020306
GO:2000637	0.379	1	0.35077	1	1	5	5	positive regulation of gene silencing by miRNA	fbgn0020306
GO:0060964	0.379	1	0.35077	1	1	5	5	regulation of gene silencing by miRNA	fbgn0020306
GO:0051349	0.42	1	0.35077	1	1	11	11	positive regulation of lyase activity	fbgn0015269
GO:0051174	6.687	8	0.35084	1	8	223	236	regulation of phosphorus metabolic process	fbgn0032816,fbgn0010382,fbgn0015269,fbgn0263395,fbgn0040394,fbgn0013672,fbgn0022382,fbgn0051935
GO:0019220	6.687	8	0.35084	1	8	223	236	regulation of phosphate metabolic process	fbgn0032816,fbgn0010382,fbgn0015269,fbgn0263395,fbgn0040394,fbgn0013672,fbgn0022382,fbgn0051935
GO:0016409	0.438	1	0.35105	1	1	28	28	palmitoyltransferase activity	fbgn0260941
GO:0002700	1.232	2	0.35185	1	2	43	47	regulation of production of molecular mediator of immune response	fbgn0260632,fbgn0011274
GO:0002784	1.232	2	0.35185	1	2	43	47	regulation of antimicrobial peptide production	fbgn0260632,fbgn0011274
GO:0000123	0.453	1	0.35225	1	1	54	56	histone acetyltransferase complex	fbgn0020306
GO:0042990	0.429	1	0.3523	1	1	23	23	regulation of transcription factor import into nucleus	fbgn0000253
GO:0031090	2.995	4	0.35232	1	4	180	184	organelle membrane	fbgn0264561,fbgn0013674,fbgn0013675,fbgn0263782
GO:0010632	0.413	1	0.35238	1	1	9	9	regulation of epithelial cell migration	fbgn0264089
GO:0002027	0.416	1	0.35313	1	1	10	10	regulation of heart rate	fbgn0011676
GO:0031329	3.933	5	0.35549	1	5	150	154	regulation of cellular catabolic process	fbgn0010382,fbgn0026379,fbgn0013672,fbgn0003079,fbgn0051935
GO:0008277	1.24	2	0.35569	1	2	32	32	regulation of G-protein coupled receptor protein signaling pathway	fbgn0000253,fbgn0015721
GO:1901988	1.245	2	0.35599	1	2	103	105	negative regulation of cell cycle phase transition	fbgn0010382,fbgn0044324
GO:1901991	1.245	2	0.35599	1	2	103	105	negative regulation of mitotic cell cycle phase transition	fbgn0010382,fbgn0044324
GO:0071705	2.122	3	0.35649	1	3	132	132	nitrogen compound transport	fbgn0014189,fbgn0001404,fbgn0050394
GO:0035151	0.431	1	0.35703	1	1	19	19	regulation of tube size, open tracheal system	fbgn0001987
GO:0009967	5.789	7	0.35718	1	7	201	209	positive regulation of signal transduction	fbgn0035761,fbgn0032816,fbgn0024836,fbgn0029082,fbgn0263395,fbgn0020306,fbgn0043070
GO:0002165	1.248	2	0.35734	1	2	44	46	instar larval or pupal development	fbgn0020306,fbgn0003079
GO:0005789	0.438	1	0.3578	1	1	39	39	endoplasmic reticulum membrane	fbgn0263782
GO:0032313	0.437	1	0.3585	1	1	28	28	regulation of Rab GTPase activity	fbgn0051935
GO:0043410	1.249	2	0.35861	1	2	36	37	positive regulation of MAPK cascade	fbgn0032816,fbgn0263395
GO:0005097	0.435	1	0.35865	1	1	27	27	Rab GTPase activator activity	fbgn0051935
GO:2001233	0.413	1	0.35931	1	1	6	7	regulation of apoptotic signaling pathway	fbgn0003079
GO:0051783	1.255	2	0.3594	1	2	65	66	regulation of nuclear division	fbgn0010382,fbgn0044324
GO:0071826	0.441	1	0.35946	1	1	46	46	ribonucleoprotein complex subunit organization	fbgn0034915
GO:0004143	0.415	1	0.3599	1	1	9	9	diacylglycerol kinase activity	fbgn0085413
GO:0007205	0.415	1	0.3599	1	1	9	9	protein kinase C-activating G-protein coupled receptor signaling pathway	fbgn0085413
GO:0050774	0.399	1	0.36042	1	1	7	11	negative regulation of dendrite morphogenesis	fbgn0015609
GO:0045314	0.437	1	0.36048	1	1	13	13	regulation of compound eye photoreceptor development	fbgn0266450
GO:0048608	3.034	4	0.36055	1	4	58	69	reproductive structure development	fbgn0261563,fbgn0005630,fbgn0263782,fbgn0264089
GO:0030162	1.258	2	0.36077	1	2	63	64	regulation of proteolysis	fbgn0010382,fbgn0264815
GO:0007475	1.249	2	0.36081	1	2	19	34	apposition of dorsal and ventral imaginal disc-derived wing surfaces	fbgn0261823,fbgn0053196
GO:1902554	0.441	1	0.36144	1	1	28	28	serine/threonine protein kinase complex	fbgn0022382
GO:0015179	0.443	1	0.36148	1	1	16	16	L-amino acid transmembrane transporter activity	fbgn0034911
GO:0016765	0.528	1	0.36166	1	1	60	63	transferase activity, transferring alkyl or aryl (other than methyl) groups	fbgn0028375
GO:0007015	3.97	5	0.362	1	5	112	115	actin filament organization	fbgn0014141,fbgn0023081,fbgn0263929,fbgn0026379,fbgn0003319
GO:0006725	17.224	19	0.36233	1	19	1204	1263	cellular aromatic compound metabolic process	fbgn0032816,fbgn0260632,fbgn0011656,fbgn0010382,fbgn0014189,fbgn0038565,fbgn0036277,fbgn0026379,fbgn0040394,fbgn0264815,fbgn0000376,fbgn0013672,fbgn0013673,fbgn0022709,fbgn0002891,fbgn0003638,fbgn0027094,fbgn0021895,fbgn0263782
GO:0042675	0.41	1	0.36233	1	1	8	9	compound eye cone cell differentiation	fbgn0021764
GO:0042325	3.969	5	0.36275	1	5	125	137	regulation of phosphorylation	fbgn0032816,fbgn0010382,fbgn0263395,fbgn0040394,fbgn0022382
GO:0015085	1.262	2	0.36306	1	2	38	42	calcium ion transmembrane transporter activity	fbgn0037238,fbgn0032593
GO:1902493	0.472	1	0.36483	1	1	56	58	acetyltransferase complex	fbgn0020306
GO:0031248	0.472	1	0.36483	1	1	56	58	protein acetyltransferase complex	fbgn0020306
GO:0015370	1.283	2	0.36487	1	2	63	65	solute:sodium symporter activity	fbgn0262476,fbgn0034911
GO:0035150	0.445	1	0.36591	1	1	20	20	regulation of tube size	fbgn0001987
GO:0051168	0.449	1	0.36611	1	1	40	40	nuclear export	fbgn0014189
GO:0048867	1.273	2	0.36736	1	2	31	31	stem cell fate determination	fbgn0010382,fbgn0085424
GO:1901214	0.448	1	0.36751	1	1	25	27	regulation of neuron death	fbgn0262579
GO:0045785	0.435	1	0.36821	1	1	9	9	positive regulation of cell adhesion	fbgn0264089
GO:0031985	0.447	1	0.36883	1	1	24	24	Golgi cisterna	fbgn0264561
GO:0046530	2.169	3	0.36918	1	3	49	59	photoreceptor cell differentiation	fbgn0029082,fbgn0265487,fbgn0259176
GO:0022411	0.447	1	0.36921	1	1	25	25	cellular component disassembly	fbgn0033438
GO:0008514	2.168	3	0.3697	1	3	112	113	organic anion transmembrane transporter activity	fbgn0050394,fbgn0050277,fbgn0034911
GO:0007601	0.435	1	0.37046	1	1	16	17	visual perception	fbgn0005664
GO:0050953	0.435	1	0.37046	1	1	16	17	sensory perception of light stimulus	fbgn0005664
GO:0051028	0.454	1	0.3722	1	1	32	32	mRNA transport	fbgn0014189
GO:0048278	0.455	1	0.37302	1	1	29	29	vesicle docking	fbgn0024980
GO:0022406	0.455	1	0.37302	1	1	29	29	membrane docking	fbgn0024980
GO:0006904	0.455	1	0.37302	1	1	29	29	vesicle docking involved in exocytosis	fbgn0024980
GO:0002759	1.29	2	0.37313	1	2	48	52	regulation of antimicrobial humoral response	fbgn0260632,fbgn0011274
GO:0002920	1.29	2	0.37313	1	2	48	52	regulation of humoral immune response	fbgn0260632,fbgn0011274
GO:0048104	0.44	1	0.37318	1	1	7	7	establishment of body hair or bristle planar orientation	fbgn0260941
GO:0051057	1.283	2	0.37323	1	2	27	30	positive regulation of small GTPase mediated signal transduction	fbgn0035761,fbgn0043070
GO:0046579	1.283	2	0.37323	1	2	27	30	positive regulation of Ras protein signal transduction	fbgn0035761,fbgn0043070
GO:0009894	4.021	5	0.37358	1	5	162	166	regulation of catabolic process	fbgn0010382,fbgn0026379,fbgn0013672,fbgn0003079,fbgn0051935
GO:0070613	1.296	2	0.3746	1	2	65	66	regulation of protein processing	fbgn0010382,fbgn0264815
GO:0007297	4.967	6	0.37644	1	6	115	135	ovarian follicle cell migration	fbgn0001987,fbgn0086655,fbgn0264442,fbgn0001404,fbgn0003079,fbgn0259176
GO:0001932	2.196	3	0.37669	1	3	74	85	regulation of protein phosphorylation	fbgn0010382,fbgn0040394,fbgn0022382
GO:0016874	3.111	4	0.3776	1	4	243	252	ligase activity	fbgn0020236,fbgn0025186,fbgn0028913,fbgn0027094
GO:0023056	5.914	7	0.37761	1	7	209	217	positive regulation of signaling	fbgn0035761,fbgn0032816,fbgn0024836,fbgn0029082,fbgn0263395,fbgn0020306,fbgn0043070
GO:0030424	3.108	4	0.37803	1	4	51	52	axon	fbgn0023081,fbgn0000464,fbgn0015609,fbgn0033159
GO:0035097	0.454	1	0.37809	1	1	25	27	histone methyltransferase complex	fbgn0086655
GO:0051239	23.252	25	0.37848	1	25	533	554	regulation of multicellular organismal process	fbgn0014141,fbgn0011676,fbgn0032816,fbgn0010575,fbgn0260632,fbgn0011656,fbgn0024836,fbgn0015269,fbgn0000464,fbgn0001404,fbgn0029082,fbgn0026379,fbgn0015872,fbgn0020306,fbgn0011274,fbgn0261563,fbgn0028369,fbgn0266450,fbgn0003079,fbgn0015609,fbgn0033159,fbgn0044047,fbgn0021764,fbgn0259176,fbgn0264089
GO:0007163	4.985	6	0.37931	1	6	132	136	establishment or maintenance of cell polarity	fbgn0024836,fbgn0263929,fbgn0001404,fbgn0029082,fbgn0003090,fbgn0003079
GO:0060180	1.312	2	0.37963	1	2	36	38	female mating behavior	fbgn0001404,fbgn0265487
GO:0005927	0.46	1	0.38006	1	1	9	9	muscle tendon junction	fbgn0259745
GO:0002682	4.979	6	0.38014	1	6	173	179	regulation of immune system process	fbgn0014141,fbgn0260632,fbgn0033438,fbgn0026379,fbgn0020306,fbgn0011274
GO:0016056	0.45	1	0.38032	1	1	10	10	rhodopsin mediated signaling pathway	fbgn0000253
GO:0071711	0.449	1	0.38039	1	1	10	10	basement membrane organization	fbgn0033438
GO:0042045	0.463	1	0.38086	1	1	15	16	epithelial fluid transport	fbgn0031571
GO:0001736	3.125	4	0.3813	1	4	61	64	establishment of planar polarity	fbgn0024836,fbgn0029082,fbgn0003090,fbgn0260941
GO:0007164	3.125	4	0.3813	1	4	61	64	establishment of tissue polarity	fbgn0024836,fbgn0029082,fbgn0003090,fbgn0260941
GO:0009744	0.459	1	0.38192	1	1	9	9	response to sucrose	fbgn0015721
GO:0042220	0.464	1	0.38219	1	1	13	14	response to cocaine	fbgn0022382
GO:0060359	0.464	1	0.38219	1	1	13	14	response to ammonium ion	fbgn0022382
GO:0010950	0.459	1	0.3825	1	1	19	20	positive regulation of endopeptidase activity	fbgn0029082
GO:0044271	5.939	7	0.38294	1	7	367	384	cellular nitrogen compound biosynthetic process	fbgn0011676,fbgn0032816,fbgn0011656,fbgn0010382,fbgn0013672,fbgn0013673,fbgn0002891
GO:0010952	0.461	1	0.38337	1	1	20	21	positive regulation of peptidase activity	fbgn0029082
GO:0098588	1.341	2	0.38347	1	2	103	107	bounding membrane of organelle	fbgn0264561,fbgn0263782
GO:0050776	2.215	3	0.38383	1	3	116	121	regulation of immune response	fbgn0260632,fbgn0033438,fbgn0011274
GO:0044723	3.139	4	0.38408	1	4	189	191	single-organism carbohydrate metabolic process	fbgn0027560,fbgn0026379,fbgn0014075,fbgn0034356
GO:0016319	3.135	4	0.38411	1	4	64	82	mushroom body development	fbgn0024836,fbgn0264442,fbgn0033159,fbgn0259176
GO:0010948	1.324	2	0.38443	1	2	109	111	negative regulation of cell cycle process	fbgn0010382,fbgn0044324
GO:0034708	0.466	1	0.38529	1	1	27	29	methyltransferase complex	fbgn0086655
GO:0009954	1.321	2	0.3858	1	2	25	25	proximal/distal pattern formation	fbgn0001987,fbgn0086655
GO:0019748	1.333	2	0.3864	1	2	78	85	secondary metabolic process	fbgn0260632,fbgn0026379
GO:0006139	15.528	17	0.38647	1	17	1092	1144	nucleobase-containing compound metabolic process	fbgn0032816,fbgn0011656,fbgn0010382,fbgn0014189,fbgn0038565,fbgn0036277,fbgn0040394,fbgn0264815,fbgn0000376,fbgn0013672,fbgn0013673,fbgn0022709,fbgn0002891,fbgn0003638,fbgn0027094,fbgn0021895,fbgn0263782
GO:0005507	0.471	1	0.38697	1	1	20	20	copper ion binding	fbgn0013675
GO:0019318	0.515	1	0.38798	1	1	39	39	hexose metabolic process	fbgn0034356
GO:0038024	1.334	2	0.38866	1	2	36	36	cargo receptor activity	fbgn0033192,fbgn0031571
GO:0042060	1.334	2	0.38915	1	2	49	50	wound healing	fbgn0033438,fbgn0033166
GO:0016746	2.256	3	0.38921	1	3	181	184	transferase activity, transferring acyl groups	fbgn0020236,fbgn0031774,fbgn0260941
GO:0042180	0.491	1	0.38943	1	1	40	40	cellular ketone metabolic process	fbgn0028375
GO:0007402	0.47	1	0.38979	1	1	9	9	ganglion mother cell fate determination	fbgn0085424
GO:0002697	1.344	2	0.39223	1	2	50	54	regulation of immune effector process	fbgn0260632,fbgn0011274
GO:0032231	0.463	1	0.39242	1	1	8	9	regulation of actin filament bundle assembly	fbgn0035761
GO:0019933	0.453	1	0.39447	1	1	6	6	cAMP-mediated signaling	fbgn0015269
GO:0034285	0.479	1	0.39462	1	1	11	11	response to disaccharide	fbgn0015721
GO:0000785	1.364	2	0.39619	1	2	104	107	chromatin	fbgn0261823,fbgn0005624
GO:0051960	9.872	11	0.39714	1	11	205	213	regulation of nervous system development	fbgn0032816,fbgn0024836,fbgn0015269,fbgn0000464,fbgn0026379,fbgn0266450,fbgn0003079,fbgn0015609,fbgn0033159,fbgn0021764,fbgn0259176
GO:0048814	1.342	2	0.39729	1	2	25	29	regulation of dendrite morphogenesis	fbgn0015609,fbgn0033159
GO:0016348	0.493	1	0.3976	1	1	15	16	imaginal disc-derived leg joint morphogenesis	fbgn0003090
GO:0048580	0.473	1	0.39834	1	1	8	8	regulation of post-embryonic development	fbgn0014141
GO:0055086	5.088	6	0.39959	1	6	215	219	nucleobase-containing small molecule metabolic process	fbgn0038565,fbgn0264815,fbgn0013672,fbgn0013673,fbgn0022709,fbgn0263782
GO:0008285	2.273	3	0.39999	1	3	55	55	negative regulation of cell proliferation	fbgn0011676,fbgn0026379,fbgn0020306
GO:0031984	0.497	1	0.40002	1	1	27	27	organelle subcompartment	fbgn0264561
GO:0006955	4.164	5	0.4007	1	5	185	202	immune response	fbgn0260632,fbgn0011656,fbgn0026379,fbgn0011274,fbgn0005630
GO:0018990	0.481	1	0.40293	1	1	10	10	ecdysis, chitin-based cuticle	fbgn0263782
GO:0009888	6.057	7	0.40326	1	7	135	140	tissue development	fbgn0260632,fbgn0011656,fbgn0086655,fbgn0026379,fbgn0261563,fbgn0259176,fbgn0264089
GO:0005604	0.493	1	0.40348	1	1	12	12	basement membrane	fbgn0261563
GO:0009152	1.392	2	0.40479	1	2	61	64	purine ribonucleotide biosynthetic process	fbgn0013672,fbgn0013673
GO:0005996	0.543	1	0.40492	1	1	43	43	monosaccharide metabolic process	fbgn0034356
GO:0045476	0.498	1	0.40494	1	1	13	14	nurse cell apoptotic process	fbgn0005630
GO:0003951	0.492	1	0.40509	1	1	12	12	NAD+ kinase activity	fbgn0085413
GO:0009743	0.497	1	0.4052	1	1	13	13	response to carbohydrate	fbgn0015721
GO:2000648	0.459	1	0.40545	1	1	6	6	positive regulation of stem cell proliferation	fbgn0259176
GO:0002052	0.459	1	0.40545	1	1	6	6	positive regulation of neuroblast proliferation	fbgn0259176
GO:0007464	1.374	2	0.40648	1	2	16	16	R3/R4 cell fate commitment	fbgn0024836,fbgn0005630
GO:0010647	6.092	7	0.40675	1	7	216	224	positive regulation of cell communication	fbgn0035761,fbgn0032816,fbgn0024836,fbgn0029082,fbgn0263395,fbgn0020306,fbgn0043070
GO:0019219	25.523	27	0.40706	1	27	937	1034	regulation of nucleobase-containing compound metabolic process	fbgn0261823,fbgn0011676,fbgn0032816,fbgn0010575,fbgn0260632,fbgn0011656,fbgn0086655,fbgn0010382,fbgn0014189,fbgn0085424,fbgn0015269,fbgn0040765,fbgn0036277,fbgn0040394,fbgn0020306,fbgn0011274,fbgn0000376,fbgn0013672,fbgn0265487,fbgn0266450,fbgn0024321,fbgn0003079,fbgn0005624,fbgn0051935,fbgn0005630,fbgn0033166,fbgn0259176
GO:0055085	8.956	10	0.40771	1	10	415	421	transmembrane transport	fbgn0035400,fbgn0035763,fbgn0265194,fbgn0037238,fbgn0032593,fbgn0015872,fbgn0013672,fbgn0013673,fbgn0050394,fbgn0010549
GO:0032107	0.504	1	0.40786	1	1	16	16	regulation of response to nutrient levels	fbgn0003079
GO:0032104	0.504	1	0.40786	1	1	16	16	regulation of response to extracellular stimulus	fbgn0003079
GO:0016321	0.516	1	0.40809	1	1	31	68	female meiosis chromosome segregation	fbgn0001987
GO:0010506	1.386	2	0.40831	1	2	55	55	regulation of autophagy	fbgn0026379,fbgn0003079
GO:0016333	0.496	1	0.40853	1	1	10	11	morphogenesis of follicular epithelium	fbgn0001404
GO:1902533	3.235	4	0.40867	1	4	97	102	positive regulation of intracellular signal transduction	fbgn0035761,fbgn0032816,fbgn0263395,fbgn0043070
GO:0003727	0.512	1	0.40905	1	1	25	26	single-stranded RNA binding	fbgn0010278
GO:0000278	2.307	3	0.40922	1	3	94	100	mitotic cell cycle	fbgn0261823,fbgn0010382,fbgn0005624
GO:0097285	0.512	1	0.41362	1	1	14	15	cell-type specific apoptotic process	fbgn0005630
GO:0042592	7.094	8	0.41434	1	8	236	242	homeostatic process	fbgn0265194,fbgn0025628,fbgn0263395,fbgn0015872,fbgn0000253,fbgn0013672,fbgn0265487,fbgn0015721
GO:0002831	1.409	2	0.41467	1	2	57	61	regulation of response to biotic stimulus	fbgn0260632,fbgn0011274
GO:0007005	1.406	2	0.41555	1	2	74	78	mitochondrion organization	fbgn0265194,fbgn0262872
GO:0050918	1.384	2	0.41563	1	2	9	9	positive chemotaxis	fbgn0000636,fbgn0263782
GO:0006164	1.425	2	0.41585	1	2	63	67	purine nucleotide biosynthetic process	fbgn0013672,fbgn0013673
GO:0005096	2.333	3	0.41666	1	3	75	77	GTPase activator activity	fbgn0036518,fbgn0015269,fbgn0051935
GO:0045937	2.338	3	0.41717	1	3	65	66	positive regulation of phosphate metabolic process	fbgn0032816,fbgn0015269,fbgn0263395
GO:0010562	2.338	3	0.41717	1	3	65	66	positive regulation of phosphorus metabolic process	fbgn0032816,fbgn0015269,fbgn0263395
GO:1900371	0.524	1	0.4172	1	1	14	14	regulation of purine nucleotide biosynthetic process	fbgn0015269
GO:0030799	0.524	1	0.4172	1	1	14	14	regulation of cyclic nucleotide metabolic process	fbgn0015269
GO:0045761	0.524	1	0.4172	1	1	14	14	regulation of adenylate cyclase activity	fbgn0015269
GO:0030814	0.524	1	0.4172	1	1	14	14	regulation of cAMP metabolic process	fbgn0015269
GO:0030817	0.524	1	0.4172	1	1	14	14	regulation of cAMP biosynthetic process	fbgn0015269
GO:0030808	0.524	1	0.4172	1	1	14	14	regulation of nucleotide biosynthetic process	fbgn0015269
GO:0030802	0.524	1	0.4172	1	1	14	14	regulation of cyclic nucleotide biosynthetic process	fbgn0015269
GO:0031279	0.524	1	0.4172	1	1	14	14	regulation of cyclase activity	fbgn0015269
GO:0034654	5.194	6	0.41787	1	6	303	320	nucleobase-containing compound biosynthetic process	fbgn0032816,fbgn0011656,fbgn0010382,fbgn0013672,fbgn0013673,fbgn0002891
GO:0051339	0.526	1	0.41799	1	1	15	15	regulation of lyase activity	fbgn0015269
GO:0052548	0.518	1	0.41847	1	1	24	25	regulation of endopeptidase activity	fbgn0029082
GO:0030308	0.512	1	0.421	1	1	11	11	negative regulation of cell growth	fbgn0026379
GO:0001703	0.508	1	0.42114	1	1	12	15	gastrulation with mouth forming first	fbgn0260632
GO:0010004	0.508	1	0.42114	1	1	12	15	gastrulation involving germ band extension	fbgn0260632
GO:0034641	16.859	18	0.42177	1	18	1213	1265	cellular nitrogen compound metabolic process	fbgn0011676,fbgn0032816,fbgn0011656,fbgn0010382,fbgn0014189,fbgn0038565,fbgn0036277,fbgn0040394,fbgn0264815,fbgn0000376,fbgn0013672,fbgn0013673,fbgn0022709,fbgn0002891,fbgn0003638,fbgn0027094,fbgn0021895,fbgn0263782
GO:0006497	0.558	1	0.42276	1	1	44	44	protein lipidation	fbgn0260941
GO:0016579	0.54	1	0.42329	1	1	41	41	protein deubiquitination	fbgn0261823
GO:0090316	0.546	1	0.42422	1	1	30	30	positive regulation of intracellular protein transport	fbgn0000253
GO:0006396	4.286	5	0.42441	1	5	392	399	RNA processing	fbgn0014189,fbgn0036277,fbgn0040394,fbgn0003638,fbgn0021895
GO:2000179	0.492	1	0.42449	1	1	7	7	positive regulation of neural precursor cell proliferation	fbgn0259176
GO:0046777	0.533	1	0.42549	1	1	15	15	protein autophosphorylation	fbgn0003079
GO:0044702	18.872	20	0.42572	1	20	654	878	single organism reproductive process	fbgn0001987,fbgn0014141,fbgn0000636,fbgn0011656,fbgn0260775,fbgn0010382,fbgn0263929,fbgn0033438,fbgn0000464,fbgn0001404,fbgn0262872,fbgn0020306,fbgn0013686,fbgn0261563,fbgn0013678,fbgn0003079,fbgn0005630,fbgn0263782,fbgn0259176,fbgn0264089
GO:0072522	1.456	2	0.42611	1	2	66	70	purine-containing compound biosynthetic process	fbgn0013672,fbgn0013673
GO:0007301	0.529	1	0.4262	1	1	10	12	female germline ring canal formation	fbgn0014141
GO:0048139	0.529	1	0.4263	1	1	11	11	female germ-line cyst encapsulation	fbgn0014141
GO:0048138	0.529	1	0.4263	1	1	11	11	germ-line cyst encapsulation	fbgn0014141
GO:0007157	2.366	3	0.42674	1	3	28	28	heterophilic cell-cell adhesion	fbgn0028645,fbgn0029082,fbgn0028369
GO:0003006	14.014	15	0.42793	1	15	483	576	developmental process involved in reproduction	fbgn0001987,fbgn0014141,fbgn0000636,fbgn0011656,fbgn0010382,fbgn0263929,fbgn0001404,fbgn0262872,fbgn0013686,fbgn0261563,fbgn0003079,fbgn0005630,fbgn0263782,fbgn0259176,fbgn0264089
GO:0043066	1.439	2	0.42833	1	2	64	70	negative regulation of apoptotic process	fbgn0032816,fbgn0259176
GO:0009260	1.465	2	0.42909	1	2	66	69	ribonucleotide biosynthetic process	fbgn0013672,fbgn0013673
GO:0046390	1.465	2	0.42909	1	2	66	69	ribose phosphate biosynthetic process	fbgn0013672,fbgn0013673
GO:0035019	0.533	1	0.42917	1	1	13	13	somatic stem cell maintenance	fbgn0010382
GO:0009311	0.568	1	0.43145	1	1	26	26	oligosaccharide metabolic process	fbgn0027560
GO:0072509	1.453	2	0.43161	1	2	48	52	divalent inorganic cation transmembrane transporter activity	fbgn0037238,fbgn0032593
GO:0090288	0.523	1	0.43304	1	1	9	9	negative regulation of cellular response to growth factor stimulus	fbgn0033438
GO:0071011	1.468	2	0.43371	1	2	148	148	precatalytic spliceosome	fbgn0036277,fbgn0021895
GO:0008013	0.517	1	0.43455	1	1	10	11	beta-catenin binding	fbgn0015609
GO:0007266	0.53	1	0.43478	1	1	13	13	Rho protein signal transduction	fbgn0036518
GO:0045089	0.571	1	0.43644	1	1	39	40	positive regulation of innate immune response	fbgn0033438
GO:0016328	0.544	1	0.43856	1	1	10	10	lateral plasma membrane	fbgn0000636
GO:0010769	3.359	4	0.43857	1	4	57	61	regulation of cell morphogenesis involved in differentiation	fbgn0024836,fbgn0000464,fbgn0015609,fbgn0033159
GO:0043067	4.341	5	0.43962	1	5	151	163	regulation of programmed cell death	fbgn0032816,fbgn0010382,fbgn0263395,fbgn0003079,fbgn0259176
GO:0044450	0.571	1	0.44042	1	1	38	38	microtubule organizing center part	fbgn0000253
GO:0048149	2.419	3	0.44068	1	3	52	66	behavioral response to ethanol	fbgn0014141,fbgn0263395,fbgn0022382
GO:0060966	0.526	1	0.44077	1	1	16	16	regulation of gene silencing by RNA	fbgn0020306
GO:0005740	0.61	1	0.44153	1	1	52	53	mitochondrial envelope	fbgn0037512
GO:0043068	1.48	2	0.44161	1	2	43	43	positive regulation of programmed cell death	fbgn0010382,fbgn0263395
GO:0030177	0.56	1	0.44163	1	1	24	26	positive regulation of Wnt signaling pathway	fbgn0024836
GO:0031349	0.581	1	0.44226	1	1	40	41	positive regulation of defense response	fbgn0033438
GO:0044772	0.562	1	0.44374	1	1	21	22	mitotic cell cycle phase transition	fbgn0010382
GO:0034637	0.561	1	0.44429	1	1	17	17	cellular carbohydrate biosynthetic process	fbgn0027560
GO:0010721	1.481	2	0.44577	1	2	32	37	negative regulation of cell development	fbgn0266450,fbgn0015609
GO:0003333	0.602	1	0.44813	1	1	31	31	amino acid transmembrane transport	fbgn0050394
GO:0043062	1.508	2	0.44918	1	2	46	49	extracellular structure organization	fbgn0014141,fbgn0033438
GO:0019725	3.414	4	0.44937	1	4	134	137	cellular homeostasis	fbgn0025628,fbgn0000253,fbgn0013672,fbgn0265487
GO:0007049	2.454	3	0.4502	1	3	110	118	cell cycle	fbgn0261823,fbgn0010382,fbgn0005624
GO:0006413	0.588	1	0.45123	1	1	52	53	translational initiation	fbgn0034915
GO:0006397	3.443	4	0.45146	1	4	277	284	mRNA processing	fbgn0014189,fbgn0036277,fbgn0003638,fbgn0021895
GO:0048311	0.568	1	0.45257	1	1	10	10	mitochondrion distribution	fbgn0262872
GO:0070646	0.595	1	0.45426	1	1	49	49	protein modification by small protein removal	fbgn0261823
GO:0050908	0.545	1	0.4543	1	1	7	7	detection of light stimulus involved in visual perception	fbgn0032593
GO:0000922	0.564	1	0.45499	1	1	21	21	spindle pole	fbgn0000253
GO:2000241	1.522	2	0.45597	1	2	54	58	regulation of reproductive process	fbgn0001404,fbgn0015872
GO:0007444	4.416	5	0.45683	1	5	142	155	imaginal disc development	fbgn0011676,fbgn0085424,fbgn0004858,fbgn0015544,fbgn0003319
GO:0007409	2.476	3	0.45755	1	3	59	77	axonogenesis	fbgn0000636,fbgn0024836,fbgn0005630
GO:0007623	3.448	4	0.45811	1	4	88	91	circadian rhythm	fbgn0011656,fbgn0015269,fbgn0038693,fbgn0022382
GO:0000228	0.571	1	0.45819	1	1	22	22	nuclear chromosome	fbgn0004858
GO:0090304	10.334	11	0.45961	1	11	872	920	nucleic acid metabolic process	fbgn0032816,fbgn0011656,fbgn0010382,fbgn0014189,fbgn0036277,fbgn0040394,fbgn0000376,fbgn0002891,fbgn0003638,fbgn0027094,fbgn0021895
GO:0014070	2.504	3	0.4614	1	3	91	97	response to organic cyclic compound	fbgn0001189,fbgn0022382,fbgn0266450
GO:1901360	18.252	19	0.46158	1	19	1275	1335	organic cyclic compound metabolic process	fbgn0032816,fbgn0260632,fbgn0011656,fbgn0010382,fbgn0014189,fbgn0038565,fbgn0036277,fbgn0026379,fbgn0040394,fbgn0264815,fbgn0000376,fbgn0013672,fbgn0013673,fbgn0022709,fbgn0002891,fbgn0003638,fbgn0027094,fbgn0021895,fbgn0263782
GO:2000027	3.469	4	0.46161	1	4	87	88	regulation of organ morphogenesis	fbgn0032816,fbgn0024836,fbgn0026379,fbgn0266450
GO:0051179	6.409	7	0.46255	1	7	204	229	localization	fbgn0014141,fbgn0011656,fbgn0263929,fbgn0001404,fbgn0026379,fbgn0262872,fbgn0003090
GO:0048584	7.395	8	0.46304	1	8	278	287	positive regulation of response to stimulus	fbgn0035761,fbgn0032816,fbgn0024836,fbgn0033438,fbgn0029082,fbgn0263395,fbgn0020306,fbgn0043070
GO:0050830	0.651	1	0.46368	1	1	40	40	defense response to Gram-positive bacterium	fbgn0011274
GO:0070588	0.599	1	0.46563	1	1	12	13	calcium ion transmembrane transport	fbgn0032593
GO:0007293	0.609	1	0.46576	1	1	22	24	germarium-derived egg chamber formation	fbgn0001404
GO:0006839	0.631	1	0.46578	1	1	57	57	mitochondrial transport	fbgn0013672
GO:0043086	0.613	1	0.46603	1	1	33	34	negative regulation of catalytic activity	fbgn0010382
GO:0051345	1.546	2	0.46605	1	2	52	54	positive regulation of hydrolase activity	fbgn0029082,fbgn0051935
GO:0072507	0.614	1	0.46692	1	1	21	23	divalent inorganic cation homeostasis	fbgn0265194
GO:0010942	1.554	2	0.46703	1	2	49	50	positive regulation of cell death	fbgn0010382,fbgn0263395
GO:0015144	0.61	1	0.46735	1	1	30	30	carbohydrate transmembrane transporter activity	fbgn0035400
GO:1901476	0.61	1	0.46735	1	1	30	30	carbohydrate transporter activity	fbgn0035400
GO:0006836	2.533	3	0.46815	1	3	117	123	neurotransmitter transport	fbgn0262476,fbgn0024980,fbgn0034911
GO:0006935	2.501	3	0.46857	1	3	26	26	chemotaxis	fbgn0000636,fbgn0263782,fbgn0264089
GO:0043269	0.637	1	0.46874	1	1	23	23	regulation of ion transport	fbgn0000253
GO:0044798	0.629	1	0.47006	1	1	59	66	nuclear transcription factor complex	fbgn0032816
GO:0051082	0.634	1	0.47008	1	1	65	65	unfolded protein binding	fbgn0260775
GO:0050778	0.635	1	0.47314	1	1	44	45	positive regulation of immune response	fbgn0033438
GO:0061134	1.673	2	0.47315	1	2	99	100	peptidase regulator activity	fbgn0261823,fbgn0264815
GO:0022604	6.465	7	0.47334	1	7	158	163	regulation of cell morphogenesis	fbgn0035761,fbgn0024836,fbgn0010382,fbgn0000464,fbgn0026379,fbgn0015609,fbgn0033159
GO:0030532	0.685	1	0.47366	1	1	88	98	small nuclear ribonucleoprotein complex	fbgn0036277
GO:0003743	0.629	1	0.47409	1	1	54	56	translation initiation factor activity	fbgn0034915
GO:0007096	0.547	1	0.47456	1	1	10	11	regulation of exit from mitosis	fbgn0010382
GO:0007436	0.61	1	0.47499	1	1	13	14	larval salivary gland morphogenesis	fbgn0026379
GO:2000026	17.384	18	0.47502	1	18	381	397	regulation of multicellular organismal development	fbgn0014141,fbgn0032816,fbgn0010575,fbgn0011656,fbgn0024836,fbgn0015269,fbgn0000464,fbgn0029082,fbgn0026379,fbgn0261563,fbgn0028369,fbgn0266450,fbgn0003079,fbgn0015609,fbgn0033159,fbgn0021764,fbgn0259176,fbgn0264089
GO:0015934	0.65	1	0.47519	1	1	103	108	large ribosomal subunit	fbgn0013686
GO:0004842	1.596	2	0.47558	1	2	117	122	ubiquitin-protein ligase activity	fbgn0025186,fbgn0028913
GO:0016791	3.546	4	0.47565	1	4	170	179	phosphatase activity	fbgn0032032,fbgn0000464,fbgn0026379,fbgn0015544
GO:0007446	0.627	1	0.47641	1	1	19	24	imaginal disc growth	fbgn0015544
GO:0046330	0.612	1	0.47662	1	1	15	16	positive regulation of JNK cascade	fbgn0263395
GO:0005924	1.564	2	0.477	1	2	28	29	cell-substrate adherens junction	fbgn0259745,fbgn0000464
GO:0008360	3.536	4	0.47704	1	4	113	114	regulation of cell shape	fbgn0035761,fbgn0010382,fbgn0000464,fbgn0026379
GO:0007416	2.534	3	0.47744	1	3	48	48	synapse assembly	fbgn0011676,fbgn0000464,fbgn0051146
GO:0046434	1.604	2	0.47758	1	2	80	80	organophosphate catabolic process	fbgn0038565,fbgn0026379
GO:0030725	0.621	1	0.47815	1	1	14	16	germline ring canal formation	fbgn0014141
GO:0044331	0.585	1	0.4782	1	1	5	5	cell-cell adhesion mediated by cadherin	fbgn0015609
GO:0030055	1.569	2	0.47872	1	2	29	30	cell-substrate junction	fbgn0259745,fbgn0000464
GO:0000151	0.646	1	0.4795	1	1	63	64	ubiquitin ligase complex	fbgn0005624
GO:0042478	0.622	1	0.47976	1	1	14	14	regulation of eye photoreceptor cell development	fbgn0266450
GO:0051124	1.566	2	0.47987	1	2	31	31	synaptic growth at neuromuscular junction	fbgn0000464,fbgn0051146
GO:0045471	2.561	3	0.4799	1	3	62	76	response to ethanol	fbgn0014141,fbgn0263395,fbgn0022382
GO:0015294	1.629	2	0.48162	1	2	80	82	solute:cation symporter activity	fbgn0262476,fbgn0034911
GO:0031532	0.626	1	0.48206	1	1	19	19	actin cytoskeleton reorganization	fbgn0023081
GO:0050962	0.597	1	0.48247	1	1	10	10	detection of light stimulus involved in sensory perception	fbgn0032593
GO:0007298	4.543	5	0.48277	1	5	107	121	border follicle cell migration	fbgn0001987,fbgn0086655,fbgn0264442,fbgn0001404,fbgn0003079
GO:0051171	26.407	27	0.48338	1	27	973	1074	regulation of nitrogen compound metabolic process	fbgn0261823,fbgn0011676,fbgn0032816,fbgn0010575,fbgn0260632,fbgn0011656,fbgn0086655,fbgn0010382,fbgn0014189,fbgn0085424,fbgn0015269,fbgn0040765,fbgn0036277,fbgn0040394,fbgn0020306,fbgn0011274,fbgn0000376,fbgn0013672,fbgn0265487,fbgn0266450,fbgn0024321,fbgn0003079,fbgn0005624,fbgn0051935,fbgn0005630,fbgn0033166,fbgn0259176
GO:0008088	0.643	1	0.48358	1	1	23	23	axon cargo transport	fbgn0262872
GO:0009611	1.596	2	0.48367	1	2	60	61	response to wounding	fbgn0033438,fbgn0033166
GO:0032388	0.653	1	0.48368	1	1	39	39	positive regulation of intracellular transport	fbgn0000253
GO:0043279	0.642	1	0.48432	1	1	25	26	response to alkaloid	fbgn0022382
GO:0007418	0.617	1	0.48447	1	1	9	9	ventral midline development	fbgn0086655
GO:0070304	0.628	1	0.48471	1	1	16	17	positive regulation of stress-activated protein kinase signaling cascade	fbgn0263395
GO:0032874	0.628	1	0.48471	1	1	16	17	positive regulation of stress-activated MAPK cascade	fbgn0263395
GO:0006259	2.605	3	0.48558	1	3	243	269	DNA metabolic process	fbgn0010382,fbgn0000376,fbgn0002891
GO:0016779	0.664	1	0.48568	1	1	74	76	nucleotidyltransferase activity	fbgn0002891
GO:0006399	0.667	1	0.4859	1	1	79	80	tRNA metabolic process	fbgn0027094
GO:0045296	0.601	1	0.48693	1	1	7	7	cadherin binding	fbgn0015609
GO:0008078	0.635	1	0.48749	1	1	8	8	mesodermal cell migration	fbgn0264089
GO:0033993	1.611	2	0.48792	1	2	46	49	response to lipid	fbgn0001189,fbgn0266450
GO:0045595	12.529	13	0.48917	1	13	268	281	regulation of cell differentiation	fbgn0014141,fbgn0032816,fbgn0024836,fbgn0010382,fbgn0000464,fbgn0026379,fbgn0028369,fbgn0266450,fbgn0003079,fbgn0015609,fbgn0033159,fbgn0021764,fbgn0259176
GO:0044451	3.611	4	0.48943	1	4	315	329	nucleoplasm part	fbgn0086655,fbgn0020306,fbgn0010278,fbgn0033166
GO:0007501	0.629	1	0.48997	1	1	11	11	mesodermal cell fate specification	fbgn0260632
GO:0030496	0.624	1	0.49028	1	1	17	18	midbody	fbgn0000253
GO:1901987	1.633	2	0.49054	1	2	131	134	regulation of cell cycle phase transition	fbgn0010382,fbgn0044324
GO:1901990	1.633	2	0.49054	1	2	131	134	regulation of mitotic cell cycle phase transition	fbgn0010382,fbgn0044324
GO:0043207	5.618	6	0.49112	1	6	275	278	response to external biotic stimulus	fbgn0028541,fbgn0011656,fbgn0011274,fbgn0261565,fbgn0033159,fbgn0005630
GO:0048511	3.601	4	0.49176	1	4	90	93	rhythmic process	fbgn0011656,fbgn0015269,fbgn0038693,fbgn0022382
GO:0045676	0.65	1	0.49302	1	1	15	16	regulation of R7 cell differentiation	fbgn0032816
GO:0015293	1.667	2	0.49339	1	2	82	84	symporter activity	fbgn0262476,fbgn0034911
GO:0042074	0.648	1	0.49394	1	1	10	10	cell migration involved in gastrulation	fbgn0264089
GO:0019787	1.654	2	0.49433	1	2	124	129	small conjugating protein ligase activity	fbgn0025186,fbgn0028913
GO:0048737	0.648	1	0.49481	1	1	10	10	imaginal disc-derived appendage development	fbgn0004858
GO:0048736	0.648	1	0.49481	1	1	10	10	appendage development	fbgn0004858
GO:0009607	5.64	6	0.49499	1	6	277	280	response to biotic stimulus	fbgn0028541,fbgn0011656,fbgn0011274,fbgn0261565,fbgn0033159,fbgn0005630
GO:0051222	0.678	1	0.49603	1	1	37	37	positive regulation of protein transport	fbgn0000253
GO:0015711	1.67	2	0.4973	1	2	78	78	organic anion transport	fbgn0050394,fbgn0050277
GO:0042551	0.664	1	0.49771	1	1	27	27	neuron maturation	fbgn0026379
GO:0016322	0.664	1	0.49771	1	1	27	27	neuron remodeling	fbgn0026379
GO:0046483	16.611	17	0.49789	1	17	1186	1241	heterocycle metabolic process	fbgn0032816,fbgn0011656,fbgn0010382,fbgn0014189,fbgn0038565,fbgn0036277,fbgn0040394,fbgn0264815,fbgn0000376,fbgn0013672,fbgn0013673,fbgn0022709,fbgn0002891,fbgn0003638,fbgn0027094,fbgn0021895,fbgn0263782
GO:0004721	2.636	3	0.49824	1	3	88	94	phosphoprotein phosphatase activity	fbgn0000464,fbgn0026379,fbgn0015544
GO:0042493	0.661	1	0.49965	1	1	12	18	response to drug	fbgn0038693
GO:0051495	0.668	1	0.49976	1	1	25	25	positive regulation of cytoskeleton organization	fbgn0035761
GO:0051646	0.656	1	0.50004	1	1	12	12	mitochondrion localization	fbgn0262872
GO:0009593	1.743	2	0.5005	1	2	136	136	detection of chemical stimulus	fbgn0000253,fbgn0033159
GO:0043933	9.653	10	0.50109	1	10	552	670	macromolecular complex subunit organization	fbgn0014141,fbgn0023081,fbgn0014189,fbgn0263929,fbgn0038565,fbgn0044324,fbgn0026379,fbgn0000253,fbgn0034915,fbgn0003319
GO:0097205	0.56	1	0.50139	1	1	7	7	renal filtration	fbgn0028369
GO:0097206	0.56	1	0.50139	1	1	7	7	nephrocyte filtration	fbgn0028369
GO:1900542	2.652	3	0.50246	1	3	85	86	regulation of purine nucleotide metabolic process	fbgn0015269,fbgn0013672,fbgn0051935
GO:0030048	0.682	1	0.5028	1	1	25	25	actin filament-based movement	fbgn0000253
GO:0009950	1.663	2	0.50465	1	2	60	74	dorsal/ventral axis specification	fbgn0260632,fbgn0003079
GO:0006140	2.67	3	0.50721	1	3	87	88	regulation of nucleotide metabolic process	fbgn0015269,fbgn0013672,fbgn0051935
GO:0050906	1.721	2	0.50724	1	2	87	87	detection of stimulus involved in sensory perception	fbgn0032593,fbgn0033159
GO:0002684	0.701	1	0.50743	1	1	50	51	positive regulation of immune system process	fbgn0033438
GO:0071482	0.687	1	0.50788	1	1	27	27	cellular response to light stimulus	fbgn0000253
GO:0060560	3.647	4	0.50875	1	4	59	63	developmental growth involved in morphogenesis	fbgn0262018,fbgn0000464,fbgn0015609,fbgn0033159
GO:0005622	2.675	3	0.50899	1	3	103	108	intracellular	fbgn0259745,fbgn0036518,fbgn0263782
GO:0019637	6.705	7	0.50968	1	7	307	312	organophosphate metabolic process	fbgn0038565,fbgn0026379,fbgn0264815,fbgn0013672,fbgn0013673,fbgn0022709,fbgn0263782
GO:0007626	5.678	6	0.50979	1	6	155	205	locomotory behavior	fbgn0010575,fbgn0011656,fbgn0015269,fbgn0038693,fbgn0022382,fbgn0263782
GO:0015297	0.702	1	0.51012	1	1	27	28	antiporter activity	fbgn0037238
GO:0008594	0.673	1	0.51019	1	1	15	15	photoreceptor cell morphogenesis	fbgn0000464
GO:0043063	0.686	1	0.51246	1	1	15	17	intercellular bridge organization	fbgn0014141
GO:0046943	1.726	2	0.51298	1	2	89	90	carboxylic acid transmembrane transporter activity	fbgn0050394,fbgn0034911
GO:0007509	0.686	1	0.51326	1	1	11	11	mesoderm migration involved in gastrulation	fbgn0264089
GO:0090130	0.686	1	0.51326	1	1	11	11	tissue migration	fbgn0264089
GO:0005100	0.677	1	0.51362	1	1	20	21	Rho GTPase activator activity	fbgn0036518
GO:0061321	0.584	1	0.51464	1	1	3	3	garland nephrocyte differentiation	fbgn0028369
GO:0005342	1.732	2	0.51467	1	2	91	92	organic acid transmembrane transporter activity	fbgn0050394,fbgn0034911
GO:0043069	1.692	2	0.51477	1	2	73	80	negative regulation of programmed cell death	fbgn0032816,fbgn0259176
GO:0043543	0.741	1	0.5151	1	1	62	64	protein acylation	fbgn0260941
GO:0032553	15.766	16	0.51544	1	16	793	813	ribonucleotide binding	fbgn0011676,fbgn0052091,fbgn0023081,fbgn0020236,fbgn0014189,fbgn0038565,fbgn0031855,fbgn0263395,fbgn0020306,fbgn0036104,fbgn0022709,fbgn0003079,fbgn0034356,fbgn0027094,fbgn0010549,fbgn0031449
GO:0046627	0.619	1	0.51635	1	1	12	12	negative regulation of insulin receptor signaling pathway	fbgn0026379
GO:1900077	0.619	1	0.51635	1	1	12	12	negative regulation of cellular response to insulin stimulus	fbgn0026379
GO:0005179	0.739	1	0.51823	1	1	54	57	hormone activity	fbgn0044047
GO:0043025	1.698	2	0.51843	1	2	57	57	neuronal cell body	fbgn0033159,fbgn0262579
GO:0046620	2.697	3	0.51868	1	3	49	50	regulation of organ growth	fbgn0011676,fbgn0010575,fbgn0026379
GO:0007051	2.751	3	0.5206	1	3	223	228	spindle organization	fbgn0014189,fbgn0044324,fbgn0000253
GO:0045596	5.747	6	0.52226	1	6	121	128	negative regulation of cell differentiation	fbgn0014141,fbgn0010382,fbgn0266450,fbgn0015609,fbgn0021764,fbgn0259176
GO:0005811	2.763	3	0.52275	1	3	207	211	lipid particle	fbgn0035401,fbgn0027560,fbgn0020236
GO:0042594	1.722	2	0.5241	1	2	69	70	response to starvation	fbgn0026379,fbgn0003079
GO:0003714	0.7	1	0.52459	1	1	22	25	transcription corepressor activity	fbgn0010575
GO:0019438	5.8	6	0.5247	1	6	360	379	aromatic compound biosynthetic process	fbgn0032816,fbgn0011656,fbgn0010382,fbgn0013672,fbgn0013673,fbgn0002891
GO:0007059	1.735	2	0.52587	1	2	99	146	chromosome segregation	fbgn0001987,fbgn0044324
GO:0006928	23.901	24	0.52629	1	24	547	642	cellular component movement	fbgn0001987,fbgn0014141,fbgn0010575,fbgn0000636,fbgn0260632,fbgn0086655,fbgn0024836,fbgn0264442,fbgn0261509,fbgn0000464,fbgn0001404,fbgn0262872,fbgn0020306,fbgn0000253,fbgn0022382,fbgn0003079,fbgn0015609,fbgn0005624,fbgn0033159,fbgn0005630,fbgn0263782,fbgn0003435,fbgn0259176,fbgn0264089
GO:0048469	0.722	1	0.52646	1	1	32	32	cell maturation	fbgn0026379
GO:0008347	1.732	2	0.53073	1	2	30	31	glial cell migration	fbgn0086655,fbgn0264089
GO:0033554	6.828	7	0.53253	1	7	404	418	cellular response to stress	fbgn0010382,fbgn0263395,fbgn0026379,fbgn0011274,fbgn0002891,fbgn0003079,fbgn0033166
GO:0019730	1.779	2	0.53308	1	2	73	73	antimicrobial humoral response	fbgn0011656,fbgn0005630
GO:0008284	1.738	2	0.53333	1	2	44	45	positive regulation of cell proliferation	fbgn0003079,fbgn0259176
GO:0005524	12.922	13	0.53336	1	13	621	639	ATP binding	fbgn0052091,fbgn0023081,fbgn0020236,fbgn0014189,fbgn0031855,fbgn0263395,fbgn0020306,fbgn0036104,fbgn0022709,fbgn0003079,fbgn0027094,fbgn0010549,fbgn0031449
GO:0031975	1.753	2	0.53402	1	2	89	90	envelope	fbgn0014075,fbgn0037512
GO:0031967	1.753	2	0.53402	1	2	89	90	organelle envelope	fbgn0014075,fbgn0037512
GO:0070647	1.772	2	0.53441	1	2	133	134	protein modification by small protein conjugation or removal	fbgn0261823,fbgn0031773
GO:0042440	1.764	2	0.53459	1	2	89	98	pigment metabolic process	fbgn0260632,fbgn0026379
GO:0016070	7.912	8	0.5354	1	8	648	669	RNA metabolic process	fbgn0032816,fbgn0011656,fbgn0014189,fbgn0036277,fbgn0040394,fbgn0003638,fbgn0027094,fbgn0021895
GO:0005783	2.84	3	0.53552	1	3	173	173	endoplasmic reticulum	fbgn0035762,fbgn0014075,fbgn0260941
GO:0000287	0.752	1	0.53596	1	1	43	46	magnesium ion binding	fbgn0026379
GO:0032559	12.947	13	0.53612	1	13	623	641	adenyl ribonucleotide binding	fbgn0052091,fbgn0023081,fbgn0020236,fbgn0014189,fbgn0031855,fbgn0263395,fbgn0020306,fbgn0036104,fbgn0022709,fbgn0003079,fbgn0027094,fbgn0010549,fbgn0031449
GO:0048513	22.994	23	0.53618	1	23	586	652	organ development	fbgn0261823,fbgn0011676,fbgn0032816,fbgn0001992,fbgn0260632,fbgn0011656,fbgn0264442,fbgn0010382,fbgn0085424,fbgn0004858,fbgn0020306,fbgn0261563,fbgn0028369,fbgn0265487,fbgn0003079,fbgn0015544,fbgn0033159,fbgn0005630,fbgn0021895,fbgn0263782,fbgn0003319,fbgn0259176,fbgn0264089
GO:0018130	5.876	6	0.53679	1	6	374	392	heterocycle biosynthetic process	fbgn0032816,fbgn0011656,fbgn0010382,fbgn0013672,fbgn0013673,fbgn0002891
GO:0031399	2.782	3	0.53701	1	3	123	135	regulation of protein modification process	fbgn0010382,fbgn0040394,fbgn0022382
GO:0006865	0.774	1	0.53704	1	1	38	38	amino acid transport	fbgn0050394
GO:0035011	0.739	1	0.53733	1	1	26	28	melanotic encapsulation of foreign target	fbgn0026379
GO:0007379	1.753	2	0.53788	1	2	39	55	segment specification	fbgn0086655,fbgn0000376
GO:0010035	0.757	1	0.53895	1	1	43	43	response to inorganic substance	fbgn0000253
GO:0090287	0.727	1	0.54015	1	1	16	16	regulation of cellular response to growth factor stimulus	fbgn0033438
GO:0045792	0.698	1	0.54044	1	1	18	20	negative regulation of cell size	fbgn0026379
GO:0005887	7.914	8	0.5409	1	8	185	189	integral component of plasma membrane	fbgn0050361,fbgn0262018,fbgn0028645,fbgn0024836,fbgn0001404,fbgn0015609,fbgn0033159,fbgn0021764
GO:0000226	4.87	5	0.54156	1	5	307	317	microtubule cytoskeleton organization	fbgn0014189,fbgn0263929,fbgn0044324,fbgn0001404,fbgn0000253
GO:0060548	1.781	2	0.54223	1	2	78	94	negative regulation of cell death	fbgn0032816,fbgn0259176
GO:0033036	4.864	5	0.54247	1	5	168	192	macromolecule localization	fbgn0014141,fbgn0011656,fbgn0263929,fbgn0026379,fbgn0003090
GO:0016203	1.787	2	0.54604	1	2	36	36	muscle attachment	fbgn0259745,fbgn0264442
GO:1902692	0.722	1	0.54699	1	1	13	13	regulation of neuroblast proliferation	fbgn0259176
GO:1901701	1.803	2	0.5476	1	2	69	72	cellular response to oxygen-containing compound	fbgn0026379,fbgn0044047
GO:0036059	0.65	1	0.54958	1	1	3	3	nephrocyte diaphragm assembly	fbgn0028369
GO:0051640	1.789	2	0.55243	1	2	35	35	organelle localization	fbgn0263929,fbgn0262872
GO:0006952	5.981	6	0.55243	1	6	317	329	defense response	fbgn0011676,fbgn0028541,fbgn0260632,fbgn0026379,fbgn0011274,fbgn0261565
GO:0034613	0.771	1	0.55292	1	1	37	37	cellular protein localization	fbgn0026379
GO:0036056	0.658	1	0.5532	1	1	4	4	filtration diaphragm	fbgn0028369
GO:0005917	0.658	1	0.5532	1	1	4	4	nephrocyte diaphragm	fbgn0028369
GO:0016071	3.92	4	0.55354	1	4	302	311	mRNA metabolic process	fbgn0014189,fbgn0036277,fbgn0003638,fbgn0021895
GO:0060142	0.663	1	0.55399	1	1	6	6	regulation of syncytium formation by plasma membrane fusion	fbgn0028369
GO:0010830	0.663	1	0.55399	1	1	6	6	regulation of myotube differentiation	fbgn0028369
GO:1901739	0.663	1	0.55399	1	1	6	6	regulation of myoblast fusion	fbgn0028369
GO:0045132	0.796	1	0.55401	1	1	48	95	meiotic chromosome segregation	fbgn0001987
GO:0004518	0.806	1	0.55408	1	1	90	101	nuclease activity	fbgn0261548
GO:0040008	10.009	10	0.55428	1	10	231	240	regulation of growth	fbgn0011676,fbgn0010575,fbgn0015269,fbgn0000464,fbgn0263395,fbgn0026379,fbgn0003079,fbgn0015609,fbgn0044047,fbgn0259176
GO:0005730	0.857	1	0.55468	1	1	128	129	nucleolus	fbgn0010278
GO:0047555	0.718	1	0.55526	1	1	5	5	3',5'-cyclic-GMP phosphodiesterase activity	fbgn0264815
GO:1901135	7.021	7	0.55589	1	7	361	366	carbohydrate derivative metabolic process	fbgn0038565,fbgn0032598,fbgn0264815,fbgn0013672,fbgn0013673,fbgn0022709,fbgn0263782
GO:0051093	7.992	8	0.55614	1	8	179	186	negative regulation of developmental process	fbgn0014141,fbgn0010382,fbgn0015269,fbgn0026379,fbgn0266450,fbgn0015609,fbgn0021764,fbgn0259176
GO:0044420	0.77	1	0.55662	1	1	17	19	extracellular matrix part	fbgn0261563
GO:0010631	6.973	7	0.55738	1	7	144	208	epithelial cell migration	fbgn0001987,fbgn0086655,fbgn0264442,fbgn0001404,fbgn0003079,fbgn0259176,fbgn0264089
GO:0097458	8.003	8	0.55788	1	8	174	176	neuron part	fbgn0050361,fbgn0023081,fbgn0262483,fbgn0033438,fbgn0000464,fbgn0015609,fbgn0033159,fbgn0262579
GO:0071822	9.051	9	0.55788	1	9	487	605	protein complex subunit organization	fbgn0014141,fbgn0023081,fbgn0014189,fbgn0263929,fbgn0038565,fbgn0044324,fbgn0026379,fbgn0000253,fbgn0003319
GO:0046843	1.812	2	0.55848	1	2	44	50	dorsal appendage formation	fbgn0263929,fbgn0259176
GO:0048747	0.763	1	0.55936	1	1	11	11	muscle fiber development	fbgn0011656
GO:0048667	0.774	1	0.56013	1	1	16	16	cell morphogenesis involved in neuron differentiation	fbgn0000464
GO:0044711	8.051	8	0.56039	1	8	459	473	single-organism biosynthetic process	fbgn0027560,fbgn0010382,fbgn0028375,fbgn0013672,fbgn0013673,fbgn0002891,fbgn0034356,fbgn0263782
GO:0070491	0.778	1	0.56066	1	1	16	17	repressing transcription factor binding	fbgn0260632
GO:2000177	0.754	1	0.56173	1	1	14	14	regulation of neural precursor cell proliferation	fbgn0259176
GO:0043085	2.894	3	0.56213	1	3	91	93	positive regulation of catalytic activity	fbgn0015269,fbgn0029082,fbgn0051935
GO:0072091	0.757	1	0.56332	1	1	15	16	regulation of stem cell proliferation	fbgn0259176
GO:0008354	1.851	2	0.56353	1	2	47	51	germ cell migration	fbgn0260632,fbgn0263782
GO:1902578	1.858	2	0.56368	1	2	67	89	single-organism localization	fbgn0263929,fbgn0262872
GO:1902580	1.858	2	0.56368	1	2	67	89	single-organism cellular localization	fbgn0263929,fbgn0262872
GO:0051169	0.822	1	0.56399	1	1	78	80	nuclear transport	fbgn0014189
GO:0006913	0.822	1	0.56399	1	1	78	80	nucleocytoplasmic transport	fbgn0014189
GO:0019935	0.77	1	0.56553	1	1	11	11	cyclic-nucleotide-mediated signaling	fbgn0015269
GO:0007265	1.846	2	0.56575	1	2	76	76	Ras protein signal transduction	fbgn0036518,fbgn0015269
GO:0007093	0.828	1	0.56666	1	1	87	89	mitotic cell cycle checkpoint	fbgn0044324
GO:0022603	10.105	10	0.56685	1	10	248	254	regulation of anatomical structure morphogenesis	fbgn0035761,fbgn0032816,fbgn0024836,fbgn0010382,fbgn0000464,fbgn0026379,fbgn0028369,fbgn0266450,fbgn0015609,fbgn0033159
GO:0055001	0.784	1	0.5689	1	1	12	12	muscle cell development	fbgn0011656
GO:0055002	0.784	1	0.5689	1	1	12	12	striated muscle cell development	fbgn0011656
GO:0030198	0.822	1	0.56894	1	1	31	32	extracellular matrix organization	fbgn0033438
GO:0016459	0.819	1	0.56911	1	1	29	29	myosin complex	fbgn0000253
GO:0016050	0.834	1	0.57064	1	1	59	59	vesicle organization	fbgn0036105
GO:0030554	13.249	13	0.5715	1	13	631	649	adenyl nucleotide binding	fbgn0052091,fbgn0023081,fbgn0020236,fbgn0014189,fbgn0031855,fbgn0263395,fbgn0020306,fbgn0036104,fbgn0022709,fbgn0003079,fbgn0027094,fbgn0010549,fbgn0031449
GO:0004725	1.845	2	0.57167	1	2	41	44	protein tyrosine phosphatase activity	fbgn0000464,fbgn0026379
GO:0007380	0.791	1	0.57246	1	1	14	14	specification of segmental identity, head	fbgn0086655
GO:0048854	0.764	1	0.57265	1	1	14	18	brain morphogenesis	fbgn0005630
GO:0045927	2.906	3	0.5727	1	3	73	79	positive regulation of growth	fbgn0015269,fbgn0044047,fbgn0259176
GO:0030426	0.765	1	0.57391	1	1	11	11	growth cone	fbgn0023081
GO:0030427	0.765	1	0.57391	1	1	11	11	site of polarized growth	fbgn0023081
GO:0008361	1.862	2	0.57448	1	2	53	56	regulation of cell size	fbgn0263395,fbgn0026379
GO:0046621	0.789	1	0.57483	1	1	19	19	negative regulation of organ growth	fbgn0026379
GO:0043186	0.747	1	0.57527	1	1	23	23	P granule	fbgn0013686
GO:0008239	0.781	1	0.57532	1	1	12	13	dipeptidyl-peptidase activity	fbgn0259175
GO:0051147	0.711	1	0.57602	1	1	8	8	regulation of muscle cell differentiation	fbgn0028369
GO:0051153	0.711	1	0.57602	1	1	8	8	regulation of striated muscle cell differentiation	fbgn0028369
GO:0005777	0.858	1	0.57637	1	1	68	68	peroxisome	fbgn0011676
GO:0005795	0.81	1	0.57726	1	1	31	31	Golgi stack	fbgn0004509
GO:0007422	3.995	4	0.57786	1	4	81	97	peripheral nervous system development	fbgn0010382,fbgn0265487,fbgn0033159,fbgn0259176
GO:0034622	1.93	2	0.57789	1	2	174	283	cellular macromolecular complex assembly	fbgn0038565,fbgn0034915
GO:0040029	1.896	2	0.57827	1	2	106	186	regulation of gene expression, epigenetic	fbgn0261823,fbgn0005624
GO:0051302	1.893	2	0.57911	1	2	80	81	regulation of cell division	fbgn0010382,fbgn0044324
GO:0035295	1.903	2	0.57962	1	2	39	39	tube development	fbgn0263782,fbgn0264089
GO:0031301	0.811	1	0.58038	1	1	39	39	integral component of organelle membrane	fbgn0004509
GO:0071900	0.838	1	0.58061	1	1	38	38	regulation of protein serine/threonine kinase activity	fbgn0040394
GO:0008362	0.805	1	0.58101	1	1	18	20	chitin-based embryonic cuticle biosynthetic process	fbgn0053196
GO:0042578	5.074	5	0.58121	1	5	203	213	phosphoric ester hydrolase activity	fbgn0032032,fbgn0000464,fbgn0026379,fbgn0264815,fbgn0015544
GO:0009968	9.178	9	0.58184	1	9	210	220	negative regulation of signal transduction	fbgn0010575,fbgn0024836,fbgn0033438,fbgn0263395,fbgn0026379,fbgn0000253,fbgn0003090,fbgn0003079,fbgn0259176
GO:0055065	0.86	1	0.58257	1	1	42	44	metal ion homeostasis	fbgn0265194
GO:0071478	0.851	1	0.58307	1	1	37	38	cellular response to radiation	fbgn0000253
GO:0042306	0.852	1	0.58374	1	1	34	34	regulation of protein import into nucleus	fbgn0000253
GO:0016616	0.912	1	0.58386	1	1	82	83	oxidoreductase activity, acting on the CH-OH group of donors, NAD or NADP as acceptor	fbgn0263782
GO:0016747	1.993	2	0.58397	1	2	160	163	transferase activity, transferring acyl groups other than amino-acyl groups	fbgn0031774,fbgn0260941
GO:0008194	1.984	2	0.58576	1	2	96	96	UDP-glycosyltransferase activity	fbgn0027560,fbgn0014075
GO:0001667	7.16	7	0.58676	1	7	147	211	ameboidal cell migration	fbgn0001987,fbgn0086655,fbgn0264442,fbgn0001404,fbgn0003079,fbgn0259176,fbgn0264089
GO:0070925	1.948	2	0.58704	1	2	120	126	organelle assembly	fbgn0262872,fbgn0034915
GO:0032870	1.93	2	0.5876	1	2	52	53	cellular response to hormone stimulus	fbgn0026379,fbgn0044047
GO:0035265	0.854	1	0.58798	1	1	23	28	organ growth	fbgn0015544
GO:0051252	22.562	22	0.5885	1	22	833	929	regulation of RNA metabolic process	fbgn0261823,fbgn0032816,fbgn0010575,fbgn0260632,fbgn0011656,fbgn0086655,fbgn0014189,fbgn0085424,fbgn0040765,fbgn0036277,fbgn0040394,fbgn0020306,fbgn0011274,fbgn0000376,fbgn0265487,fbgn0266450,fbgn0024321,fbgn0003079,fbgn0005624,fbgn0005630,fbgn0033166,fbgn0259176
GO:0015291	3.064	3	0.5886	1	3	162	165	secondary active transmembrane transporter activity	fbgn0262476,fbgn0037238,fbgn0034911
GO:0050769	0.797	1	0.58873	1	1	16	16	positive regulation of neurogenesis	fbgn0259176
GO:0046873	6.187	6	0.58909	1	6	207	217	metal ion transmembrane transporter activity	fbgn0262476,fbgn0265194,fbgn0037238,fbgn0038691,fbgn0032593,fbgn0034911
GO:0016881	1.968	2	0.58929	1	2	145	151	acid-amino acid ligase activity	fbgn0025186,fbgn0028913
GO:0044282	0.905	1	0.58929	1	1	71	72	small molecule catabolic process	fbgn0026379
GO:0044212	3.014	3	0.58997	1	3	99	105	transcription regulatory region DNA binding	fbgn0032816,fbgn0260632,fbgn0005624
GO:0044297	1.933	2	0.59084	1	2	63	63	cell body	fbgn0033159,fbgn0262579
GO:0005912	4.03	4	0.59093	1	4	69	71	adherens junction	fbgn0259745,fbgn0000464,fbgn0029082,fbgn0028369
GO:0015672	4.093	4	0.59121	1	4	152	156	monovalent inorganic cation transport	fbgn0037238,fbgn0038691,fbgn0013672,fbgn0013673
GO:0022008	8.256	8	0.59122	1	8	569	569	neurogenesis	fbgn0035762,fbgn0083945,fbgn0033557,fbgn0036277,fbgn0040394,fbgn0020306,fbgn0010278,fbgn0005630
GO:0030258	0.88	1	0.59123	1	1	56	57	lipid modification	fbgn0026379
GO:0070161	4.033	4	0.59142	1	4	70	72	anchoring junction	fbgn0259745,fbgn0000464,fbgn0029082,fbgn0028369
GO:0009725	1.944	2	0.59152	1	2	54	55	response to hormone	fbgn0026379,fbgn0044047
GO:0009584	0.82	1	0.59179	1	1	16	16	detection of visible light	fbgn0032593
GO:0001071	14.444	14	0.59244	1	14	411	428	nucleic acid binding transcription factor activity	fbgn0032816,fbgn0010575,fbgn0260632,fbgn0011656,fbgn0086655,fbgn0264442,fbgn0085424,fbgn0040765,fbgn0011274,fbgn0261565,fbgn0266450,fbgn0024321,fbgn0005630,fbgn0259176
GO:0045879	0.835	1	0.59244	1	1	17	18	negative regulation of smoothened signaling pathway	fbgn0010575
GO:0003700	14.444	14	0.59244	1	14	411	428	sequence-specific DNA binding transcription factor activity	fbgn0032816,fbgn0010575,fbgn0260632,fbgn0011656,fbgn0086655,fbgn0264442,fbgn0085424,fbgn0040765,fbgn0011274,fbgn0261565,fbgn0266450,fbgn0024321,fbgn0005630,fbgn0259176
GO:0042327	1.948	2	0.59334	1	2	54	55	positive regulation of phosphorylation	fbgn0032816,fbgn0263395
GO:0045934	6.188	6	0.59441	1	6	240	310	negative regulation of nucleobase-containing compound metabolic process	fbgn0261823,fbgn0011676,fbgn0010575,fbgn0260632,fbgn0086655,fbgn0005624
GO:0004115	0.787	1	0.5945	1	1	4	4	3',5'-cyclic-AMP phosphodiesterase activity	fbgn0264815
GO:0035639	15.504	15	0.59489	1	15	780	800	purine ribonucleoside triphosphate binding	fbgn0052091,fbgn0023081,fbgn0020236,fbgn0014189,fbgn0038565,fbgn0031855,fbgn0263395,fbgn0020306,fbgn0036104,fbgn0022709,fbgn0003079,fbgn0034356,fbgn0027094,fbgn0010549,fbgn0031449
GO:0051241	1.95	2	0.59544	1	2	47	47	negative regulation of multicellular organismal process	fbgn0026379,fbgn0021764
GO:0006605	0.887	1	0.59564	1	1	70	70	protein targeting	fbgn0015298
GO:0005001	0.798	1	0.59648	1	1	6	7	transmembrane receptor protein tyrosine phosphatase activity	fbgn0000464
GO:0019198	0.798	1	0.59648	1	1	6	7	transmembrane receptor protein phosphatase activity	fbgn0000464
GO:0007275	0.836	1	0.59649	1	1	29	30	multicellular organismal development	fbgn0010549
GO:0022412	15.498	15	0.59653	1	15	503	608	cellular process involved in reproduction in multicellular organism	fbgn0001987,fbgn0014141,fbgn0000636,fbgn0260632,fbgn0011656,fbgn0086655,fbgn0264442,fbgn0010382,fbgn0263929,fbgn0001404,fbgn0262872,fbgn0003079,fbgn0005630,fbgn0263782,fbgn0259176
GO:0032555	15.529	15	0.59779	1	15	782	802	purine ribonucleotide binding	fbgn0052091,fbgn0023081,fbgn0020236,fbgn0014189,fbgn0038565,fbgn0031855,fbgn0263395,fbgn0020306,fbgn0036104,fbgn0022709,fbgn0003079,fbgn0034356,fbgn0027094,fbgn0010549,fbgn0031449
GO:0032550	15.529	15	0.59779	1	15	782	802	purine ribonucleoside binding	fbgn0052091,fbgn0023081,fbgn0020236,fbgn0014189,fbgn0038565,fbgn0031855,fbgn0263395,fbgn0020306,fbgn0036104,fbgn0022709,fbgn0003079,fbgn0034356,fbgn0027094,fbgn0010549,fbgn0031449
GO:0001883	15.529	15	0.59779	1	15	782	802	purine nucleoside binding	fbgn0052091,fbgn0023081,fbgn0020236,fbgn0014189,fbgn0038565,fbgn0031855,fbgn0263395,fbgn0020306,fbgn0036104,fbgn0022709,fbgn0003079,fbgn0034356,fbgn0027094,fbgn0010549,fbgn0031449
GO:0017085	0.84	1	0.59948	1	1	15	17	response to insecticide	fbgn0050361
GO:0006366	0.864	1	0.59973	1	1	57	57	transcription from RNA polymerase II promoter	fbgn0011656
GO:1901615	2.051	2	0.60006	1	2	114	118	organic hydroxy compound metabolic process	fbgn0260632,fbgn0026379
GO:0001964	0.829	1	0.60047	1	1	16	18	startle response	fbgn0005630
GO:1901362	6.262	6	0.60083	1	6	399	418	organic cyclic compound biosynthetic process	fbgn0032816,fbgn0011656,fbgn0010382,fbgn0013672,fbgn0013673,fbgn0002891
GO:0006281	0.916	1	0.60097	1	1	107	116	DNA repair	fbgn0002891
GO:0006974	3.078	3	0.60106	1	3	254	266	cellular response to DNA damage stimulus	fbgn0010382,fbgn0011274,fbgn0002891
GO:0036058	0.765	1	0.60184	1	1	4	4	filtration diaphragm assembly	fbgn0028369
GO:0007030	0.895	1	0.60214	1	1	64	64	Golgi organization	fbgn0263395
GO:0032549	15.572	15	0.6022	1	15	786	806	ribonucleoside binding	fbgn0052091,fbgn0023081,fbgn0020236,fbgn0014189,fbgn0038565,fbgn0031855,fbgn0263395,fbgn0020306,fbgn0036104,fbgn0022709,fbgn0003079,fbgn0034356,fbgn0027094,fbgn0010549,fbgn0031449
GO:0004702	0.876	1	0.60228	1	1	34	35	receptor signaling protein serine/threonine kinase activity	fbgn0263395
GO:0002168	0.859	1	0.60299	1	1	27	29	instar larval development	fbgn0003079
GO:0050793	23.756	23	0.60451	1	23	554	575	regulation of developmental process	fbgn0035761,fbgn0014141,fbgn0032816,fbgn0010575,fbgn0260632,fbgn0011656,fbgn0024836,fbgn0010382,fbgn0015269,fbgn0000464,fbgn0029082,fbgn0026379,fbgn0020306,fbgn0011274,fbgn0261563,fbgn0028369,fbgn0266450,fbgn0003079,fbgn0015609,fbgn0033159,fbgn0021764,fbgn0259176,fbgn0264089
GO:0001882	15.6	15	0.6047	1	15	788	808	nucleoside binding	fbgn0052091,fbgn0023081,fbgn0020236,fbgn0014189,fbgn0038565,fbgn0031855,fbgn0263395,fbgn0020306,fbgn0036104,fbgn0022709,fbgn0003079,fbgn0034356,fbgn0027094,fbgn0010549,fbgn0031449
GO:0007362	0.881	1	0.60534	1	1	27	28	terminal region determination	fbgn0003079
GO:0006959	2.038	2	0.60643	1	2	92	99	humoral immune response	fbgn0011656,fbgn0005630
GO:0022414	22.789	22	0.60902	1	22	786	1044	reproductive process	fbgn0001987,fbgn0014141,fbgn0000636,fbgn0011656,fbgn0260775,fbgn0010382,fbgn0263929,fbgn0033438,fbgn0000464,fbgn0001404,fbgn0262872,fbgn0020306,fbgn0264815,fbgn0013686,fbgn0261563,fbgn0013678,fbgn0265487,fbgn0003079,fbgn0005630,fbgn0263782,fbgn0259176,fbgn0264089
GO:0051172	6.285	6	0.60949	1	6	243	313	negative regulation of nitrogen compound metabolic process	fbgn0261823,fbgn0011676,fbgn0010575,fbgn0260632,fbgn0086655,fbgn0005624
GO:0072499	0.907	1	0.60974	1	1	19	19	photoreceptor cell axon guidance	fbgn0000253
GO:0001067	3.103	3	0.61059	1	3	100	106	regulatory region nucleic acid binding	fbgn0032816,fbgn0260632,fbgn0005624
GO:0000975	3.103	3	0.61059	1	3	100	106	regulatory region DNA binding	fbgn0032816,fbgn0260632,fbgn0005624
GO:0005913	0.872	1	0.6107	1	1	17	17	cell-cell adherens junction	fbgn0029082
GO:0010033	9.413	9	0.61159	1	9	293	317	response to organic substance	fbgn0014141,fbgn0001189,fbgn0263395,fbgn0026379,fbgn0022382,fbgn0266450,fbgn0015721,fbgn0033159,fbgn0044047
GO:0048813	6.28	6	0.61191	1	6	170	194	dendrite morphogenesis	fbgn0024836,fbgn0264442,fbgn0085424,fbgn0020306,fbgn0005630,fbgn0264089
GO:0044770	0.893	1	0.6122	1	1	25	26	cell cycle phase transition	fbgn0010382
GO:0030246	2.138	2	0.61316	1	2	119	122	carbohydrate binding	fbgn0031289,fbgn0031571
GO:0044092	0.921	1	0.61339	1	1	41	42	negative regulation of molecular function	fbgn0010382
GO:0035556	8.415	8	0.61346	1	8	287	294	intracellular signal transduction	fbgn0001189,fbgn0023081,fbgn0036518,fbgn0010382,fbgn0015269,fbgn0263395,fbgn0085413,fbgn0003079
GO:0044454	0.937	1	0.61349	1	1	88	92	nuclear chromosome part	fbgn0005624
GO:0008234	0.946	1	0.61349	1	1	75	80	cysteine-type peptidase activity	fbgn0030521
GO:0033043	5.231	5	0.61411	1	5	218	224	regulation of organelle organization	fbgn0035761,fbgn0023081,fbgn0010382,fbgn0044324,fbgn0010278
GO:0048102	2.025	2	0.61465	1	2	71	71	autophagic cell death	fbgn0030521,fbgn0259176
GO:0035071	2.025	2	0.61465	1	2	71	71	salivary gland cell autophagic cell death	fbgn0030521,fbgn0259176
GO:0008201	0.862	1	0.61504	1	1	14	15	heparin binding	fbgn0264089
GO:0046822	0.928	1	0.61519	1	1	40	40	regulation of nucleocytoplasmic transport	fbgn0000253
GO:0030865	0.908	1	0.61698	1	1	29	29	cortical cytoskeleton organization	fbgn0262483
GO:0009636	0.891	1	0.61902	1	1	22	24	response to toxic substance	fbgn0050361
GO:0007276	9.473	9	0.61919	1	9	312	453	gamete generation	fbgn0260775,fbgn0010382,fbgn0033438,fbgn0000464,fbgn0001404,fbgn0020306,fbgn0013678,fbgn0003079,fbgn0259176
GO:0004889	0.876	1	0.61964	1	1	10	11	acetylcholine-activated cation-selective channel activity	fbgn0028875
GO:0005892	0.876	1	0.61964	1	1	10	11	acetylcholine-gated channel complex	fbgn0028875
GO:0031594	3.098	3	0.62012	1	3	44	44	neuromuscular junction	fbgn0000636,fbgn0260632,fbgn0051146
GO:0005262	0.93	1	0.62046	1	1	26	28	calcium channel activity	fbgn0032593
GO:0046058	0.891	1	0.62218	1	1	11	11	cAMP metabolic process	fbgn0264815
GO:0048193	0.953	1	0.62222	1	1	80	82	Golgi vesicle transport	fbgn0035762
GO:0008283	4.238	4	0.6233	1	4	146	154	cell proliferation	fbgn0026379,fbgn0004858,fbgn0020306,fbgn0015544
GO:0009408	1.013	1	0.62361	1	1	85	87	response to heat	fbgn0015269
GO:0016569	0.981	1	0.62372	1	1	96	98	covalent chromatin modification	fbgn0261823
GO:0016570	0.981	1	0.62372	1	1	96	98	histone modification	fbgn0261823
GO:1901293	2.127	2	0.624	1	2	95	99	nucleoside phosphate biosynthetic process	fbgn0013672,fbgn0013673
GO:0009165	2.127	2	0.624	1	2	95	99	nucleotide biosynthetic process	fbgn0013672,fbgn0013673
GO:1900180	0.952	1	0.62519	1	1	35	35	regulation of protein localization to nucleus	fbgn0000253
GO:0009267	0.937	1	0.62635	1	1	36	36	cellular response to starvation	fbgn0003079
GO:0030307	0.89	1	0.6264	1	1	27	28	positive regulation of cell growth	fbgn0259176
GO:0007367	0.943	1	0.62788	1	1	23	30	segment polarity determination	fbgn0024836
GO:0019991	0.951	1	0.6283	1	1	30	32	septate junction assembly	fbgn0001987
GO:0016021	29.243	28	0.62875	1	28	1164	1182	integral component of membrane	fbgn0262476,fbgn0035400,fbgn0035763,fbgn0028541,fbgn0029507,fbgn0050361,fbgn0262018,fbgn0000636,fbgn0028645,fbgn0024836,fbgn0050389,fbgn0028875,fbgn0264561,fbgn0037238,fbgn0000464,fbgn0001404,fbgn0015872,fbgn0004509,fbgn0040726,fbgn0028375,fbgn0013674,fbgn0013675,fbgn0015609,fbgn0034911,fbgn0010549,fbgn0033159,fbgn0263782,fbgn0021764
GO:0006066	0.991	1	0.63034	1	1	60	60	alcohol metabolic process	fbgn0026379
GO:0044093	3.197	3	0.63072	1	3	106	108	positive regulation of molecular function	fbgn0015269,fbgn0029082,fbgn0051935
GO:0007432	0.936	1	0.63125	1	1	14	14	salivary gland boundary specification	fbgn0264089
GO:0055080	0.983	1	0.63163	1	1	51	53	cation homeostasis	fbgn0265194
GO:0032535	3.171	3	0.63178	1	3	93	96	regulation of cellular component size	fbgn0023081,fbgn0263395,fbgn0026379
GO:0046942	1.008	1	0.63259	1	1	55	55	carboxylic acid transport	fbgn0050394
GO:0015849	1.008	1	0.63259	1	1	55	55	organic acid transport	fbgn0050394
GO:0031669	0.954	1	0.6327	1	1	37	37	cellular response to nutrient levels	fbgn0003079
GO:0016199	2.035	2	0.63425	1	2	24	25	axon midline choice point recognition	fbgn0005630,fbgn0264089
GO:0017076	15.908	15	0.63505	1	15	795	815	purine nucleotide binding	fbgn0052091,fbgn0023081,fbgn0020236,fbgn0014189,fbgn0038565,fbgn0031855,fbgn0263395,fbgn0020306,fbgn0036104,fbgn0022709,fbgn0003079,fbgn0034356,fbgn0027094,fbgn0010549,fbgn0031449
GO:0008355	3.185	3	0.63522	1	3	58	87	olfactory learning	fbgn0014141,fbgn0000636,fbgn0015269
GO:0008293	0.965	1	0.63535	1	1	35	35	torso signaling pathway	fbgn0003079
GO:0043413	1.01	1	0.63616	1	1	68	69	macromolecule glycosylation	fbgn0014075
GO:0006486	1.01	1	0.63616	1	1	68	69	protein glycosylation	fbgn0014075
GO:2001020	0.953	1	0.63776	1	1	22	22	regulation of response to DNA damage stimulus	fbgn0000253
GO:0070085	1.016	1	0.6384	1	1	70	71	glycosylation	fbgn0014075
GO:0019901	0.953	1	0.63905	1	1	33	33	protein kinase binding	fbgn0040394
GO:0031668	0.972	1	0.63962	1	1	39	39	cellular response to extracellular stimulus	fbgn0003079
GO:0023057	9.622	9	0.64068	1	9	222	233	negative regulation of signaling	fbgn0010575,fbgn0024836,fbgn0033438,fbgn0263395,fbgn0026379,fbgn0000253,fbgn0003090,fbgn0003079,fbgn0259176
GO:0097367	19.09	18	0.64163	1	18	955	976	carbohydrate derivative binding	fbgn0011676,fbgn0052091,fbgn0023081,fbgn0020236,fbgn0014189,fbgn0038565,fbgn0031855,fbgn0032598,fbgn0263395,fbgn0020306,fbgn0036104,fbgn0022709,fbgn0003079,fbgn0034356,fbgn0027094,fbgn0010549,fbgn0031449,fbgn0264089
GO:0071214	0.997	1	0.6426	1	1	43	44	cellular response to abiotic stimulus	fbgn0000253
GO:0044281	10.816	10	0.64337	1	10	655	662	small molecule metabolic process	fbgn0020236,fbgn0038565,fbgn0026379,fbgn0264815,fbgn0028375,fbgn0013672,fbgn0013673,fbgn0022709,fbgn0027094,fbgn0263782
GO:0030811	2.128	2	0.64343	1	2	71	72	regulation of nucleotide catabolic process	fbgn0013672,fbgn0051935
GO:0033121	2.128	2	0.64343	1	2	71	72	regulation of purine nucleotide catabolic process	fbgn0013672,fbgn0051935
GO:0009118	2.128	2	0.64343	1	2	71	72	regulation of nucleoside metabolic process	fbgn0013672,fbgn0051935
GO:0051707	5.49	5	0.6448	1	5	273	276	response to other organism	fbgn0028541,fbgn0011656,fbgn0011274,fbgn0261565,fbgn0005630
GO:0010648	9.666	9	0.64605	1	9	226	237	negative regulation of cell communication	fbgn0010575,fbgn0024836,fbgn0033438,fbgn0263395,fbgn0026379,fbgn0000253,fbgn0003090,fbgn0003079,fbgn0259176
GO:0010720	0.944	1	0.64785	1	1	19	19	positive regulation of cell development	fbgn0259176
GO:0031987	0.952	1	0.64829	1	1	18	20	locomotion involved in locomotory behavior	fbgn0005630
GO:0015296	1.043	1	0.6488	1	1	42	44	anion:cation symporter activity	fbgn0034911
GO:0032320	0.981	1	0.6488	1	1	25	25	positive regulation of Ras GTPase activity	fbgn0051935
GO:0006793	17.079	16	0.64967	1	16	676	709	phosphorus metabolic process	fbgn0023081,fbgn0020236,fbgn0038565,fbgn0000464,fbgn0031855,fbgn0263395,fbgn0026379,fbgn0085413,fbgn0264815,fbgn0000253,fbgn0013672,fbgn0013673,fbgn0022709,fbgn0022382,fbgn0003079,fbgn0263782
GO:0050919	0.994	1	0.65103	1	1	15	15	negative chemotaxis	fbgn0264089
GO:0008135	1.016	1	0.65144	1	1	75	77	translation factor activity, nucleic acid binding	fbgn0034915
GO:0043408	2.182	2	0.65207	1	2	64	65	regulation of MAPK cascade	fbgn0032816,fbgn0263395
GO:0045088	1.044	1	0.65321	1	1	70	71	regulation of innate immune response	fbgn0033438
GO:0034703	2.159	2	0.65382	1	2	34	36	cation channel complex	fbgn0265194,fbgn0032593
GO:0019932	1.003	1	0.65447	1	1	20	20	second-messenger-mediated signaling	fbgn0015269
GO:0070983	1.012	1	0.65509	1	1	21	21	dendrite guidance	fbgn0020306
GO:0046914	15.093	14	0.65547	1	14	824	835	transition metal ion binding	fbgn0259745,fbgn0011676,fbgn0001992,fbgn0033438,fbgn0025186,fbgn0003090,fbgn0261565,fbgn0013674,fbgn0013675,fbgn0005624,fbgn0260941,fbgn0031689,fbgn0033978,fbgn0033979
GO:0019900	1.002	1	0.65589	1	1	40	41	kinase binding	fbgn0040394
GO:0048585	9.751	9	0.6566	1	9	251	261	negative regulation of response to stimulus	fbgn0010575,fbgn0024836,fbgn0033438,fbgn0263395,fbgn0026379,fbgn0000253,fbgn0003090,fbgn0003079,fbgn0259176
GO:0021700	1.034	1	0.65727	1	1	43	44	developmental maturation	fbgn0026379
GO:0030703	0.996	1	0.65741	1	1	32	46	eggshell formation	fbgn0259176
GO:0007304	0.996	1	0.65741	1	1	32	45	chorion-containing eggshell formation	fbgn0259176
GO:0006457	1.063	1	0.65777	1	1	106	107	protein folding	fbgn0260775
GO:0031400	0.957	1	0.65793	1	1	29	31	negative regulation of protein modification process	fbgn0010382
GO:0030534	5.517	5	0.65954	1	5	145	206	adult behavior	fbgn0014141,fbgn0050361,fbgn0263395,fbgn0022382,fbgn0003435
GO:0046488	1.057	1	0.66142	1	1	57	58	phosphatidylinositol metabolic process	fbgn0026379
GO:0004867	1.182	1	0.66145	1	1	70	70	serine-type endopeptidase inhibitor activity	fbgn0264815
GO:0031012	4.467	4	0.66157	1	4	187	188	extracellular matrix	fbgn0005664,fbgn0053196,fbgn0033438,fbgn0264089
GO:0032956	2.186	2	0.66201	1	2	51	52	regulation of actin cytoskeleton organization	fbgn0035761,fbgn0023081
GO:0032970	2.186	2	0.66201	1	2	51	52	regulation of actin filament-based process	fbgn0035761,fbgn0023081
GO:0043547	1.021	1	0.66292	1	1	28	29	positive regulation of GTPase activity	fbgn0051935
GO:0000075	1.07	1	0.66316	1	1	101	103	cell cycle checkpoint	fbgn0044324
GO:0006820	2.286	2	0.66352	1	2	112	112	anion transport	fbgn0050394,fbgn0050277
GO:0006351	2.229	2	0.6643	1	2	125	136	transcription, DNA-templated	fbgn0032816,fbgn0011656
GO:0046068	0.995	1	0.66599	1	1	13	13	cGMP metabolic process	fbgn0264815
GO:0007415	0.996	1	0.66602	1	1	10	10	defasciculation of motor neuron axon	fbgn0028645
GO:0010629	7.734	7	0.66693	1	7	294	379	negative regulation of gene expression	fbgn0261823,fbgn0010575,fbgn0260632,fbgn0086655,fbgn0004858,fbgn0020306,fbgn0005624
GO:0007519	1.012	1	0.66746	1	1	14	14	skeletal muscle tissue development	fbgn0011656
GO:0050801	1.097	1	0.66868	1	1	61	63	ion homeostasis	fbgn0265194
GO:0007479	1.039	1	0.66899	1	1	17	17	leg disc proximal/distal pattern formation	fbgn0086655
GO:0044427	3.453	3	0.67024	1	3	292	412	chromosomal part	fbgn0261823,fbgn0044324,fbgn0005624
GO:0000976	2.259	2	0.67035	1	2	76	82	transcription regulatory region sequence-specific DNA binding	fbgn0032816,fbgn0260632
GO:0007472	1.041	1	0.67065	1	1	20	21	wing disc morphogenesis	fbgn0003079
GO:0035025	1.029	1	0.67184	1	1	16	17	positive regulation of Rho protein signal transduction	fbgn0035761
GO:0006812	7.79	7	0.67277	1	7	258	266	cation transport	fbgn0265194,fbgn0028875,fbgn0037238,fbgn0038691,fbgn0032593,fbgn0013672,fbgn0013673
GO:0044391	1.119	1	0.6736	1	1	169	176	ribosomal subunit	fbgn0013686
GO:0035770	1.007	1	0.67514	1	1	37	39	ribonucleoprotein granule	fbgn0013686
GO:0033157	1.101	1	0.67634	1	1	52	52	regulation of intracellular protein transport	fbgn0000253
GO:0010468	27.745	26	0.67687	1	26	1057	1181	regulation of gene expression	fbgn0261823,fbgn0032816,fbgn0010575,fbgn0260632,fbgn0011656,fbgn0086655,fbgn0010382,fbgn0014189,fbgn0085424,fbgn0040765,fbgn0036277,fbgn0026379,fbgn0040394,fbgn0004858,fbgn0020306,fbgn0264815,fbgn0011274,fbgn0000376,fbgn0265487,fbgn0266450,fbgn0024321,fbgn0003079,fbgn0005624,fbgn0005630,fbgn0033166,fbgn0259176
GO:0050909	1.216	1	0.67762	1	1	70	72	sensory perception of taste	fbgn0040726
GO:0046578	3.407	3	0.6787	1	3	77	80	regulation of Ras protein signal transduction	fbgn0035761,fbgn0015269,fbgn0043070
GO:0000977	1.103	1	0.67924	1	1	43	47	RNA polymerase II regulatory region sequence-specific DNA binding	fbgn0260632
GO:0008101	1.021	1	0.67946	1	1	12	15	decapentaplegic signaling pathway	fbgn0259176
GO:0071496	1.083	1	0.67998	1	1	41	41	cellular response to external stimulus	fbgn0003079
GO:0045185	1.113	1	0.68164	1	1	47	48	maintenance of protein location	fbgn0003090
GO:0048583	23.662	22	0.68232	1	22	720	755	regulation of response to stimulus	fbgn0035761,fbgn0032816,fbgn0010575,fbgn0260632,fbgn0024836,fbgn0015269,fbgn0033438,fbgn0000464,fbgn0001404,fbgn0029082,fbgn0263395,fbgn0026379,fbgn0015872,fbgn0020306,fbgn0011274,fbgn0000253,fbgn0003090,fbgn0015721,fbgn0003079,fbgn0015609,fbgn0043070,fbgn0259176
GO:0051056	3.43	3	0.68344	1	3	78	81	regulation of small GTPase mediated signal transduction	fbgn0035761,fbgn0015269,fbgn0043070
GO:0016879	2.342	2	0.68345	1	2	174	181	ligase activity, forming carbon-nitrogen bonds	fbgn0025186,fbgn0028913
GO:0009581	2.273	2	0.68345	1	2	60	61	detection of external stimulus	fbgn0032593,fbgn0033159
GO:0009582	2.273	2	0.68345	1	2	60	61	detection of abiotic stimulus	fbgn0032593,fbgn0033159
GO:0007280	1.089	1	0.68431	1	1	25	25	pole cell migration	fbgn0263782
GO:0065008	23.701	22	0.68541	1	22	805	833	regulation of biological quality	fbgn0001987,fbgn0035761,fbgn0011676,fbgn0024980,fbgn0023081,fbgn0265194,fbgn0011656,fbgn0024836,fbgn0264442,fbgn0010382,fbgn0025628,fbgn0000464,fbgn0001404,fbgn0263395,fbgn0026379,fbgn0015872,fbgn0000253,fbgn0003090,fbgn0013672,fbgn0265487,fbgn0015721,fbgn0005630
GO:0008509	3.547	3	0.68566	1	3	178	180	anion transmembrane transporter activity	fbgn0050394,fbgn0050277,fbgn0034911
GO:0003735	1.169	1	0.68579	1	1	190	272	structural constituent of ribosome	fbgn0013686
GO:0072594	1.149	1	0.68654	1	1	99	101	establishment of protein localization to organelle	fbgn0015298
GO:0005539	1.085	1	0.68882	1	1	33	34	glycosaminoglycan binding	fbgn0264089
GO:0016567	1.145	1	0.69034	1	1	78	79	protein ubiquitination	fbgn0031773
GO:0034660	1.186	1	0.69096	1	1	141	142	ncRNA metabolic process	fbgn0027094
GO:0008595	1.117	1	0.69126	1	1	45	61	anterior/posterior axis specification, embryo	fbgn0260632
GO:0060255	30.018	28	0.69137	1	28	1173	1307	regulation of macromolecule metabolic process	fbgn0261823,fbgn0011676,fbgn0032816,fbgn0010575,fbgn0260632,fbgn0011656,fbgn0086655,fbgn0010382,fbgn0014189,fbgn0085424,fbgn0040765,fbgn0036277,fbgn0026379,fbgn0040394,fbgn0004858,fbgn0020306,fbgn0264815,fbgn0011274,fbgn0000376,fbgn0022382,fbgn0265487,fbgn0266450,fbgn0024321,fbgn0003079,fbgn0005624,fbgn0005630,fbgn0033166,fbgn0259176
GO:0031667	2.339	2	0.69392	1	2	84	88	response to nutrient levels	fbgn0026379,fbgn0003079
GO:0035223	1.115	1	0.6941	1	1	19	19	leg disc pattern formation	fbgn0086655
GO:0004112	1.053	1	0.69487	1	1	7	7	cyclic-nucleotide phosphodiesterase activity	fbgn0264815
GO:0004114	1.053	1	0.69487	1	1	7	7	3',5'-cyclic-nucleotide phosphodiesterase activity	fbgn0264815
GO:0030832	1.133	1	0.69495	1	1	34	34	regulation of actin filament length	fbgn0023081
GO:0008064	1.133	1	0.69495	1	1	34	34	regulation of actin polymerization or depolymerization	fbgn0023081
GO:0005925	1.082	1	0.69495	1	1	19	20	focal adhesion	fbgn0000464
GO:0006811	10.17	9	0.69585	1	9	378	388	ion transport	fbgn0265194,fbgn0028875,fbgn0037238,fbgn0038691,fbgn0032593,fbgn0013672,fbgn0013673,fbgn0050394,fbgn0050277
GO:0032504	2.492	2	0.69626	1	2	224	226	multicellular organism reproduction	fbgn0264815,fbgn0053462
GO:0008016	1.14	1	0.69661	1	1	23	24	regulation of heart contraction	fbgn0011676
GO:0080090	31.11	29	0.697	1	29	1167	1290	regulation of primary metabolic process	fbgn0261823,fbgn0011676,fbgn0032816,fbgn0010575,fbgn0260632,fbgn0011656,fbgn0086655,fbgn0010382,fbgn0014189,fbgn0085424,fbgn0015269,fbgn0040765,fbgn0036277,fbgn0040394,fbgn0020306,fbgn0264815,fbgn0011274,fbgn0000376,fbgn0013672,fbgn0022382,fbgn0265487,fbgn0266450,fbgn0024321,fbgn0003079,fbgn0005624,fbgn0051935,fbgn0005630,fbgn0033166,fbgn0259176
GO:0009612	1.152	1	0.69799	1	1	27	48	response to mechanical stimulus	fbgn0033159
GO:0009991	2.357	2	0.69808	1	2	86	90	response to extracellular stimulus	fbgn0026379,fbgn0003079
GO:0010970	1.123	1	0.69835	1	1	37	38	microtubule-based transport	fbgn0262872
GO:0016740	18.752	17	0.69873	1	17	1054	1087	transferase activity	fbgn0035401,fbgn0027560,fbgn0023081,fbgn0020236,fbgn0036142,fbgn0036266,fbgn0001404,fbgn0031855,fbgn0263395,fbgn0085413,fbgn0028375,fbgn0031774,fbgn0022709,fbgn0002891,fbgn0014075,fbgn0003079,fbgn0260941
GO:0008306	3.505	3	0.69944	1	3	68	98	associative learning	fbgn0014141,fbgn0000636,fbgn0015269
GO:0007254	1.133	1	0.69976	1	1	27	28	JNK cascade	fbgn0263395
GO:0030855	1.134	1	0.69997	1	1	23	23	epithelial cell differentiation	fbgn0029082
GO:0051641	3.531	3	0.7003	1	3	127	149	cellular localization	fbgn0263929,fbgn0026379,fbgn0262872
GO:0045892	5.806	5	0.70079	1	5	218	288	negative regulation of transcription, DNA-templated	fbgn0261823,fbgn0010575,fbgn0260632,fbgn0086655,fbgn0005624
GO:1902679	5.806	5	0.70079	1	5	218	288	negative regulation of RNA biosynthetic process	fbgn0261823,fbgn0010575,fbgn0260632,fbgn0086655,fbgn0005624
GO:0051403	1.137	1	0.70096	1	1	28	29	stress-activated MAPK cascade	fbgn0263395
GO:0006650	1.176	1	0.70101	1	1	67	68	glycerophospholipid metabolic process	fbgn0026379
GO:0030705	1.134	1	0.7016	1	1	39	40	cytoskeleton-dependent intracellular transport	fbgn0262872
GO:0098589	3.546	3	0.70167	1	3	114	114	membrane region	fbgn0000636,fbgn0029082,fbgn0263782
GO:0007017	8.04	7	0.70231	1	7	445	468	microtubule-based process	fbgn0014189,fbgn0263929,fbgn0038565,fbgn0044324,fbgn0001404,fbgn0262872,fbgn0000253
GO:0019222	36.383	34	0.70286	1	34	1407	1549	regulation of metabolic process	fbgn0261823,fbgn0011676,fbgn0032816,fbgn0010575,fbgn0260632,fbgn0011656,fbgn0086655,fbgn0010382,fbgn0014189,fbgn0085424,fbgn0015269,fbgn0040765,fbgn0030521,fbgn0036277,fbgn0029082,fbgn0263395,fbgn0026379,fbgn0040394,fbgn0004858,fbgn0020306,fbgn0264815,fbgn0011274,fbgn0000376,fbgn0013672,fbgn0022382,fbgn0265487,fbgn0266450,fbgn0024321,fbgn0003079,fbgn0005624,fbgn0051935,fbgn0005630,fbgn0033166,fbg…
GO:0046331	5.796	5	0.70324	1	5	206	213	lateral inhibition	fbgn0053196,fbgn0032587,fbgn0033438,fbgn0000253,fbgn0264089
GO:0045168	5.796	5	0.70324	1	5	206	213	cell-cell signaling involved in cell fate commitment	fbgn0053196,fbgn0032587,fbgn0033438,fbgn0000253,fbgn0264089
GO:0005813	1.157	1	0.70364	1	1	62	63	centrosome	fbgn0044324
GO:0032446	1.188	1	0.70371	1	1	85	86	protein modification by small protein conjugation	fbgn0031773
GO:0005201	1.137	1	0.70424	1	1	28	28	extracellular matrix structural constituent	fbgn0053196
GO:0048523	24.987	23	0.70469	1	23	843	955	negative regulation of cellular process	fbgn0261823,fbgn0014141,fbgn0011676,fbgn0032816,fbgn0010575,fbgn0260632,fbgn0086655,fbgn0024836,fbgn0010382,fbgn0015269,fbgn0033438,fbgn0044324,fbgn0263395,fbgn0026379,fbgn0020306,fbgn0000253,fbgn0003090,fbgn0266450,fbgn0003079,fbgn0015609,fbgn0005624,fbgn0021764,fbgn0259176
GO:0005635	1.097	1	0.70559	1	1	35	35	nuclear envelope	fbgn0014075
GO:0071013	1.201	1	0.70571	1	1	123	123	catalytic step 2 spliceosome	fbgn0036277
GO:0005829	2.797	2	0.70818	1	2	407	413	cytosol	fbgn0034915,fbgn0052363
GO:0006468	6.969	6	0.70853	1	6	232	251	protein phosphorylation	fbgn0023081,fbgn0031855,fbgn0263395,fbgn0000253,fbgn0022382,fbgn0003079
GO:0032501	47.788	45	0.70932	1	45	1636	1924	multicellular organismal process	fbgn0001987,fbgn0259745,fbgn0014141,fbgn0001189,fbgn0005664,fbgn0023530,fbgn0050361,fbgn0053196,fbgn0010575,fbgn0262018,fbgn0000636,fbgn0260632,fbgn0086655,fbgn0024836,fbgn0264442,fbgn0010382,fbgn0085424,fbgn0015269,fbgn0001404,fbgn0263395,fbgn0026379,fbgn0015872,fbgn0020306,fbgn0264815,fbgn0053462,fbgn0000253,fbgn0000376,fbgn0023496,fbgn0040726,fbgn0013672,fbgn0013674,fbgn0022382,fbgn0028369,fbg…
GO:0031098	1.169	1	0.71029	1	1	31	32	stress-activated protein kinase signaling cascade	fbgn0263395
GO:0000122	3.61	3	0.7132	1	3	123	125	negative regulation of transcription from RNA polymerase II promoter	fbgn0010575,fbgn0260632,fbgn0086655
GO:0010638	1.216	1	0.71371	1	1	61	61	positive regulation of organelle organization	fbgn0035761
GO:0044707	43.784	41	0.71427	1	41	1379	1638	single-multicellular organism process	fbgn0001987,fbgn0259745,fbgn0014141,fbgn0001189,fbgn0005664,fbgn0023530,fbgn0050361,fbgn0053196,fbgn0010575,fbgn0262018,fbgn0000636,fbgn0260632,fbgn0086655,fbgn0024836,fbgn0264442,fbgn0010382,fbgn0085424,fbgn0015269,fbgn0263395,fbgn0026379,fbgn0015872,fbgn0020306,fbgn0000253,fbgn0000376,fbgn0023496,fbgn0040726,fbgn0013672,fbgn0013674,fbgn0022382,fbgn0028369,fbgn0015721,fbgn0003079,fbgn0015609,fbg…
GO:0005634	30.348	28	0.71476	1	28	1336	1502	nucleus	fbgn0261823,fbgn0035761,fbgn0010575,fbgn0260632,fbgn0011656,fbgn0086655,fbgn0264442,fbgn0010382,fbgn0014189,fbgn0085424,fbgn0040765,fbgn0044324,fbgn0036277,fbgn0040394,fbgn0004858,fbgn0020306,fbgn0011274,fbgn0000376,fbgn0261565,fbgn0265487,fbgn0266450,fbgn0024321,fbgn0003638,fbgn0015721,fbgn0010278,fbgn0005624,fbgn0005630,fbgn0259176
GO:0051253	5.905	5	0.71548	1	5	227	297	negative regulation of RNA metabolic process	fbgn0261823,fbgn0010575,fbgn0260632,fbgn0086655,fbgn0005624
GO:0001012	1.222	1	0.71662	1	1	47	51	RNA polymerase II regulatory region DNA binding	fbgn0260632
GO:0019904	2.415	2	0.71689	1	2	58	61	protein domain specific binding	fbgn0000464,fbgn0026379
GO:0098542	3.709	3	0.7172	1	3	213	215	defense response to other organism	fbgn0028541,fbgn0011274,fbgn0261565
GO:0031647	1.13	1	0.71732	1	1	44	45	regulation of protein stability	fbgn0026379
GO:0030431	1.221	1	0.71734	1	1	35	41	sleep	fbgn0013674
GO:0005578	2.405	2	0.71789	1	2	54	55	proteinaceous extracellular matrix	fbgn0053196,fbgn0264089
GO:0007428	1.184	1	0.71842	1	1	16	19	primary branching, open tracheal system	fbgn0003079
GO:0007389	15.688	14	0.71985	1	14	421	505	pattern specification process	fbgn0001987,fbgn0010575,fbgn0262018,fbgn0260632,fbgn0086655,fbgn0024836,fbgn0085424,fbgn0020306,fbgn0000376,fbgn0003079,fbgn0015609,fbgn0260941,fbgn0259176,fbgn0264089
GO:0006184	1.252	1	0.72197	1	1	56	56	GTP catabolic process	fbgn0038565
GO:0005198	7.125	6	0.72244	1	6	517	609	structural molecule activity	fbgn0005664,fbgn0053196,fbgn0035788,fbgn0004554,fbgn0038565,fbgn0013686
GO:0044445	1.276	1	0.72253	1	1	149	234	cytosolic part	fbgn0036105
GO:0030178	1.213	1	0.72273	1	1	26	28	negative regulation of Wnt signaling pathway	fbgn0024836
GO:0006807	21.164	19	0.723	1	19	1490	1548	nitrogen compound metabolic process	fbgn0011676,fbgn0032816,fbgn0011656,fbgn0010382,fbgn0014189,fbgn0038565,fbgn0036277,fbgn0032598,fbgn0040394,fbgn0264815,fbgn0000376,fbgn0013672,fbgn0013673,fbgn0022709,fbgn0002891,fbgn0003638,fbgn0027094,fbgn0021895,fbgn0263782
GO:0042706	2.443	2	0.72391	1	2	40	41	eye photoreceptor cell fate commitment	fbgn0024836,fbgn0005630
GO:0001752	2.443	2	0.72391	1	2	40	41	compound eye photoreceptor fate commitment	fbgn0024836,fbgn0005630
GO:0000165	1.217	1	0.72391	1	1	35	37	MAPK cascade	fbgn0263395
GO:0023014	1.217	1	0.72391	1	1	35	37	signal transduction by phosphorylation	fbgn0263395
GO:0007449	1.217	1	0.72425	1	1	22	22	proximal/distal pattern formation, imaginal disc	fbgn0086655
GO:0007426	1.218	1	0.7243	1	1	25	27	tracheal outgrowth, open tracheal system	fbgn0033438
GO:1901069	1.262	1	0.72457	1	1	58	58	guanosine-containing compound catabolic process	fbgn0038565
GO:0007517	4.722	4	0.72465	1	4	85	95	muscle organ development	fbgn0011656,fbgn0264442,fbgn0028369,fbgn0265487
GO:0045935	8.195	7	0.72506	1	7	272	286	positive regulation of nucleobase-containing compound metabolic process	fbgn0032816,fbgn0260632,fbgn0011656,fbgn0086655,fbgn0015269,fbgn0011274,fbgn0005630
GO:0046039	1.266	1	0.72552	1	1	60	60	GTP metabolic process	fbgn0038565
GO:0006470	2.455	2	0.72605	1	2	82	89	protein dephosphorylation	fbgn0000464,fbgn0026379
GO:0014706	1.203	1	0.72666	1	1	19	20	striated muscle tissue development	fbgn0011656
GO:0009203	1.268	1	0.72669	1	1	58	58	ribonucleoside triphosphate catabolic process	fbgn0038565
GO:0009207	1.268	1	0.72669	1	1	58	58	purine ribonucleoside triphosphate catabolic process	fbgn0038565
GO:0009146	1.268	1	0.72669	1	1	58	58	purine nucleoside triphosphate catabolic process	fbgn0038565
GO:0034702	3.659	3	0.72747	1	3	65	68	ion channel complex	fbgn0265194,fbgn0028875,fbgn0032593
GO:0033057	3.669	3	0.72795	1	3	105	130	multicellular organismal reproductive behavior	fbgn0001404,fbgn0264815,fbgn0265487
GO:0009143	1.274	1	0.7282	1	1	59	59	nucleoside triphosphate catabolic process	fbgn0038565
GO:0006195	1.275	1	0.7284	1	1	59	59	purine nucleotide catabolic process	fbgn0038565
GO:0009261	1.275	1	0.7284	1	1	59	59	ribonucleotide catabolic process	fbgn0038565
GO:0009154	1.275	1	0.7284	1	1	59	59	purine ribonucleotide catabolic process	fbgn0038565
GO:0043623	1.266	1	0.72856	1	1	87	88	cellular protein complex assembly	fbgn0038565
GO:0009966	17.915	16	0.72909	1	16	512	535	regulation of signal transduction	fbgn0035761,fbgn0032816,fbgn0010575,fbgn0024836,fbgn0015269,fbgn0033438,fbgn0029082,fbgn0263395,fbgn0026379,fbgn0020306,fbgn0000253,fbgn0003090,fbgn0015721,fbgn0003079,fbgn0043070,fbgn0259176
GO:0005815	1.244	1	0.7291	1	1	70	71	microtubule organizing center	fbgn0044324
GO:1901068	1.284	1	0.73048	1	1	64	64	guanosine-containing compound metabolic process	fbgn0038565
GO:0046552	2.479	2	0.73061	1	2	41	43	photoreceptor cell fate commitment	fbgn0024836,fbgn0005630
GO:0051223	1.284	1	0.73104	1	1	64	64	regulation of protein transport	fbgn0000253
GO:0007043	2.468	2	0.73343	1	2	46	48	cell-cell junction assembly	fbgn0001987,fbgn0028369
GO:0015079	2.513	2	0.73356	1	2	47	49	potassium ion transmembrane transporter activity	fbgn0037238,fbgn0038691
GO:0008104	3.74	3	0.73432	1	3	123	125	protein localization	fbgn0014141,fbgn0026379,fbgn0003090
GO:0006796	16.966	15	0.73516	1	15	666	699	phosphate-containing compound metabolic process	fbgn0023081,fbgn0038565,fbgn0000464,fbgn0031855,fbgn0263395,fbgn0026379,fbgn0085413,fbgn0264815,fbgn0000253,fbgn0013672,fbgn0013673,fbgn0022709,fbgn0022382,fbgn0003079,fbgn0263782
GO:0044448	2.516	2	0.73653	1	2	56	56	cell cortex part	fbgn0262483,fbgn0260941
GO:0004866	1.448	1	0.7378	1	1	87	88	endopeptidase inhibitor activity	fbgn0264815
GO:0006914	1.274	1	0.7394	1	1	40	41	autophagy	fbgn0026379
GO:0070201	1.315	1	0.73956	1	1	68	68	regulation of establishment of protein localization	fbgn0000253
GO:0032561	2.608	2	0.7403	1	2	162	164	guanyl ribonucleotide binding	fbgn0038565,fbgn0034356
GO:0005525	2.608	2	0.7403	1	2	162	164	GTP binding	fbgn0038565,fbgn0034356
GO:0016200	1.172	1	0.74323	1	1	6	6	synaptic target attraction	fbgn0000636
GO:0032386	1.33	1	0.74365	1	1	68	68	regulation of intracellular transport	fbgn0000253
GO:0030001	4.974	4	0.74477	1	4	147	151	metal ion transport	fbgn0265194,fbgn0037238,fbgn0038691,fbgn0032593
GO:0006152	1.364	1	0.74516	1	1	65	65	purine nucleoside catabolic process	fbgn0038565
GO:0046130	1.364	1	0.74516	1	1	65	65	purine ribonucleoside catabolic process	fbgn0038565
GO:0016310	8.385	7	0.74528	1	7	299	321	phosphorylation	fbgn0023081,fbgn0031855,fbgn0263395,fbgn0085413,fbgn0000253,fbgn0022382,fbgn0003079
GO:0061135	1.476	1	0.74531	1	1	89	90	endopeptidase regulator activity	fbgn0264815
GO:0072523	1.366	1	0.74563	1	1	66	66	purine-containing compound catabolic process	fbgn0038565
GO:0048869	36.009	33	0.74568	1	33	1348	1443	cellular developmental process	fbgn0001987,fbgn0261823,fbgn0035762,fbgn0010575,fbgn0262018,fbgn0000636,fbgn0260632,fbgn0011656,fbgn0083945,fbgn0024836,fbgn0264442,fbgn0010382,fbgn0085424,fbgn0033557,fbgn0000464,fbgn0001404,fbgn0036277,fbgn0029082,fbgn0026379,fbgn0040394,fbgn0020306,fbgn0011274,fbgn0028369,fbgn0265487,fbgn0010278,fbgn0003079,fbgn0015609,fbgn0033159,fbgn0005630,fbgn0021895,fbgn0021764,fbgn0259176,fbgn0264089
GO:0030414	1.48	1	0.74603	1	1	90	91	peptidase inhibitor activity	fbgn0264815
GO:0019001	2.64	2	0.74636	1	2	164	166	guanyl nucleotide binding	fbgn0038565,fbgn0034356
GO:0010160	1.281	1	0.74643	1	1	21	22	formation of organ boundary	fbgn0264089
GO:0045211	1.273	1	0.74678	1	1	22	26	postsynaptic membrane	fbgn0028875
GO:0008589	1.289	1	0.74782	1	1	30	33	regulation of smoothened signaling pathway	fbgn0010575
GO:0042454	1.382	1	0.74821	1	1	68	68	ribonucleoside catabolic process	fbgn0038565
GO:0009164	1.382	1	0.74821	1	1	68	68	nucleoside catabolic process	fbgn0038565
GO:1901137	2.66	2	0.74841	1	2	129	132	carbohydrate derivative biosynthetic process	fbgn0013672,fbgn0013673
GO:0048663	2.572	2	0.74908	1	2	47	49	neuron fate commitment	fbgn0024836,fbgn0005630
GO:0051726	6.128	5	0.74959	1	5	312	321	regulation of cell cycle	fbgn0010382,fbgn0044324,fbgn0026379,fbgn0040394,fbgn0003079
GO:0048610	17.145	15	0.75058	1	15	629	886	cellular process involved in reproduction	fbgn0001987,fbgn0014141,fbgn0000636,fbgn0260632,fbgn0011656,fbgn0086655,fbgn0264442,fbgn0010382,fbgn0263929,fbgn0001404,fbgn0262872,fbgn0003079,fbgn0005630,fbgn0263782,fbgn0259176
GO:0045610	1.315	1	0.75071	1	1	24	25	regulation of hemocyte differentiation	fbgn0014141
GO:0000981	5.002	4	0.75107	1	4	127	134	sequence-specific DNA binding RNA polymerase II transcription factor activity	fbgn0260632,fbgn0011656,fbgn0085424,fbgn0011274
GO:0009987	124.244	120	0.7511	1	120	6084	6982	cellular process	fbgn0001987,fbgn0261823,fbgn0014141,fbgn0035400,fbgn0035763,fbgn0035762,fbgn0011676,fbgn0001189,fbgn0032816,fbgn0024980,fbgn0050361,fbgn0053196,fbgn0010575,fbgn0027560,fbgn0023081,fbgn0262483,fbgn0265194,fbgn0262018,fbgn0000636,fbgn0260632,fbgn0036518,fbgn0011656,fbgn0028645,fbgn0083945,fbgn0086655,fbgn0020236,fbgn0024836,fbgn0013702,fbgn0013704,fbgn0013705,fbgn0013701,fbgn0264442,fbgn0013706,fbg…
GO:0051606	3.923	3	0.75125	1	3	200	201	detection of stimulus	fbgn0032593,fbgn0000253,fbgn0033159
GO:0007365	1.319	1	0.75166	1	1	34	42	periodic partitioning	fbgn0024836
GO:0032774	2.648	2	0.75237	1	2	176	187	RNA biosynthetic process	fbgn0032816,fbgn0011656
GO:0016323	1.314	1	0.75393	1	1	26	26	basolateral plasma membrane	fbgn0000636
GO:0034329	2.57	2	0.75406	1	2	49	51	cell junction assembly	fbgn0001987,fbgn0028369
GO:0044706	3.824	3	0.75412	1	3	116	145	multi-multicellular organism process	fbgn0001404,fbgn0264815,fbgn0265487
GO:0007414	1.288	1	0.75436	1	1	14	14	axonal defasciculation	fbgn0028645
GO:0060537	1.31	1	0.75503	1	1	21	22	muscle tissue development	fbgn0011656
GO:1901265	22.53	20	0.75514	1	20	1079	1104	nucleoside phosphate binding	fbgn0011676,fbgn0052091,fbgn0023081,fbgn0020236,fbgn0014189,fbgn0025628,fbgn0038565,fbgn0031855,fbgn0263395,fbgn0020306,fbgn0036104,fbgn0022709,fbgn0002891,fbgn0003079,fbgn0034356,fbgn0027094,fbgn0010549,fbgn0263782,fbgn0003435,fbgn0031449
GO:0000166	22.53	20	0.75514	1	20	1079	1104	nucleotide binding	fbgn0011676,fbgn0052091,fbgn0023081,fbgn0020236,fbgn0014189,fbgn0025628,fbgn0038565,fbgn0031855,fbgn0263395,fbgn0020306,fbgn0036104,fbgn0022709,fbgn0002891,fbgn0003079,fbgn0034356,fbgn0027094,fbgn0010549,fbgn0263782,fbgn0003435,fbgn0031449
GO:0001709	6.139	5	0.75597	1	5	137	139	cell fate determination	fbgn0261823,fbgn0010382,fbgn0085424,fbgn0026379,fbgn0259176
GO:0004674	5.039	4	0.75637	1	4	188	199	protein serine/threonine kinase activity	fbgn0023081,fbgn0031855,fbgn0263395,fbgn0003079
GO:0007614	1.299	1	0.75668	1	1	21	21	short-term memory	fbgn0015269
GO:0035159	1.309	1	0.75683	1	1	24	24	regulation of tube length, open tracheal system	fbgn0024836
GO:0007398	1.332	1	0.75695	1	1	23	23	ectoderm development	fbgn0260632
GO:0006403	1.37	1	0.75761	1	1	63	85	RNA localization	fbgn0263929
GO:0016614	1.46	1	0.75906	1	1	121	123	oxidoreductase activity, acting on CH-OH group of donors	fbgn0263782
GO:0060179	2.622	2	0.75967	1	2	65	87	male mating behavior	fbgn0001404,fbgn0264815
GO:0045886	1.367	1	0.76087	1	1	37	37	negative regulation of synaptic growth at neuromuscular junction	fbgn0015269
GO:0051961	1.367	1	0.76087	1	1	37	37	negative regulation of nervous system development	fbgn0015269
GO:0051964	1.367	1	0.76087	1	1	37	37	negative regulation of synapse assembly	fbgn0015269
GO:0000003	2.799	2	0.76102	1	2	232	235	reproduction	fbgn0264815,fbgn0053462
GO:1901658	1.435	1	0.76107	1	1	70	70	glycosyl compound catabolic process	fbgn0038565
GO:0060968	1.353	1	0.76314	1	1	55	59	regulation of gene silencing	fbgn0020306
GO:0005200	1.327	1	0.76364	1	1	43	45	structural constituent of cytoskeleton	fbgn0038565
GO:1902582	5.131	4	0.76369	1	4	346	353	single-organism intracellular transport	fbgn0035762,fbgn0262872,fbgn0013672,fbgn0015298
GO:0004553	1.503	1	0.76371	1	1	96	103	hydrolase activity, hydrolyzing O-glycosyl compounds	fbgn0031716
GO:0046328	1.384	1	0.76658	1	1	40	41	regulation of JNK cascade	fbgn0263395
GO:0003002	10.767	9	0.7673	1	9	268	303	regionalization	fbgn0001987,fbgn0010575,fbgn0260632,fbgn0086655,fbgn0024836,fbgn0020306,fbgn0003079,fbgn0259176,fbgn0264089
GO:0006355	20.59	18	0.76757	1	18	761	853	regulation of transcription, DNA-templated	fbgn0261823,fbgn0032816,fbgn0010575,fbgn0260632,fbgn0011656,fbgn0086655,fbgn0085424,fbgn0040765,fbgn0040394,fbgn0011274,fbgn0000376,fbgn0266450,fbgn0024321,fbgn0003079,fbgn0005624,fbgn0005630,fbgn0033166,fbgn0259176
GO:2001141	20.59	18	0.76757	1	18	761	853	regulation of RNA biosynthetic process	fbgn0261823,fbgn0032816,fbgn0010575,fbgn0260632,fbgn0011656,fbgn0086655,fbgn0085424,fbgn0040765,fbgn0040394,fbgn0011274,fbgn0000376,fbgn0266450,fbgn0024321,fbgn0003079,fbgn0005624,fbgn0005630,fbgn0033166,fbgn0259176
GO:0009166	1.437	1	0.76774	1	1	68	68	nucleotide catabolic process	fbgn0038565
GO:0034333	1.288	1	0.76857	1	1	16	16	adherens junction assembly	fbgn0028369
GO:0046486	1.425	1	0.76907	1	1	79	80	glycerolipid metabolic process	fbgn0026379
GO:0007219	1.394	1	0.76941	1	1	46	49	Notch signaling pathway	fbgn0004858
GO:0005874	1.341	1	0.76951	1	1	49	51	microtubule	fbgn0038565
GO:1901292	1.445	1	0.76983	1	1	70	70	nucleoside phosphate catabolic process	fbgn0038565
GO:0016301	9.718	8	0.77019	1	8	348	370	kinase activity	fbgn0023081,fbgn0036142,fbgn0036266,fbgn0031855,fbgn0263395,fbgn0085413,fbgn0022709,fbgn0003079
GO:0070302	1.4	1	0.77044	1	1	41	42	regulation of stress-activated protein kinase signaling cascade	fbgn0263395
GO:1901564	9.884	8	0.77044	1	8	615	626	organonitrogen compound metabolic process	fbgn0038565,fbgn0032598,fbgn0264815,fbgn0013672,fbgn0013673,fbgn0022709,fbgn0027094,fbgn0263782
GO:0032872	1.4	1	0.77044	1	1	41	42	regulation of stress-activated MAPK cascade	fbgn0263395
GO:0048609	13.012	11	0.77141	1	11	421	589	multicellular organismal reproductive process	fbgn0260775,fbgn0010382,fbgn0033438,fbgn0000464,fbgn0001404,fbgn0020306,fbgn0264815,fbgn0013678,fbgn0265487,fbgn0003079,fbgn0259176
GO:0046907	6.374	5	0.77199	1	5	427	435	intracellular transport	fbgn0035762,fbgn0014189,fbgn0262872,fbgn0013672,fbgn0015298
GO:0050768	1.364	1	0.77224	1	1	29	34	negative regulation of neurogenesis	fbgn0015609
GO:0061318	1.29	1	0.7731	1	1	12	12	renal filtration cell differentiation	fbgn0028369
GO:0061319	1.29	1	0.7731	1	1	12	12	nephrocyte differentiation	fbgn0028369
GO:0031323	33.379	30	0.77317	1	30	1251	1377	regulation of cellular metabolic process	fbgn0261823,fbgn0011676,fbgn0032816,fbgn0010575,fbgn0260632,fbgn0011656,fbgn0086655,fbgn0010382,fbgn0014189,fbgn0085424,fbgn0015269,fbgn0040765,fbgn0036277,fbgn0263395,fbgn0026379,fbgn0040394,fbgn0020306,fbgn0011274,fbgn0000376,fbgn0013672,fbgn0022382,fbgn0265487,fbgn0266450,fbgn0024321,fbgn0003079,fbgn0005624,fbgn0051935,fbgn0005630,fbgn0033166,fbgn0259176
GO:0010564	2.734	2	0.77337	1	2	185	192	regulation of cell cycle process	fbgn0010382,fbgn0044324
GO:0006629	5.266	4	0.77409	1	4	356	357	lipid metabolic process	fbgn0024740,fbgn0026379,fbgn0023496,fbgn0263782
GO:0005667	1.441	1	0.77444	1	1	92	106	transcription factor complex	fbgn0032816
GO:0016311	2.722	2	0.77467	1	2	109	116	dephosphorylation	fbgn0000464,fbgn0026379
GO:0045859	1.426	1	0.77483	1	1	55	66	regulation of protein kinase activity	fbgn0040394
GO:0009892	11.951	10	0.77501	1	10	436	533	negative regulation of metabolic process	fbgn0261823,fbgn0011676,fbgn0010575,fbgn0260632,fbgn0086655,fbgn0010382,fbgn0004858,fbgn0020306,fbgn0003079,fbgn0005624
GO:0016798	1.553	1	0.7753	1	1	102	111	hydrolase activity, acting on glycosyl bonds	fbgn0031716
GO:0043549	1.429	1	0.77537	1	1	56	67	regulation of kinase activity	fbgn0040394
GO:0051338	1.429	1	0.77537	1	1	56	67	regulation of transferase activity	fbgn0040394
GO:0060249	3.903	3	0.7754	1	3	86	89	anatomical structure homeostasis	fbgn0000253,fbgn0013672,fbgn0265487
GO:0043168	20.76	18	0.77676	1	18	1026	1055	anion binding	fbgn0011676,fbgn0052091,fbgn0023081,fbgn0020236,fbgn0014189,fbgn0025628,fbgn0038565,fbgn0031855,fbgn0263395,fbgn0020306,fbgn0036104,fbgn0022709,fbgn0003079,fbgn0034356,fbgn0027094,fbgn0010549,fbgn0031449,fbgn0264089
GO:0051234	31.422	28	0.77715	1	28	1531	1579	establishment of localization	fbgn0262476,fbgn0035400,fbgn0035763,fbgn0035762,fbgn0052091,fbgn0028541,fbgn0024980,fbgn0265194,fbgn0028875,fbgn0014189,fbgn0037238,fbgn0044324,fbgn0001404,fbgn0038691,fbgn0032593,fbgn0262872,fbgn0015872,fbgn0003090,fbgn0013672,fbgn0013673,fbgn0015298,fbgn0015721,fbgn0050394,fbgn0050277,fbgn0034911,fbgn0010549,fbgn0033159,fbgn0031571
GO:0016810	1.528	1	0.77739	1	1	87	89	hydrolase activity, acting on carbon-nitrogen (but not peptide) bonds	fbgn0032598
GO:0005768	1.466	1	0.77867	1	1	88	88	endosome	fbgn0028541
GO:0008061	1.607	1	0.78032	1	1	108	108	chitin binding	fbgn0032598
GO:0008345	1.428	1	0.78043	1	1	28	28	larval locomotory behavior	fbgn0010575
GO:0000578	1.457	1	0.78404	1	1	55	71	embryonic axis specification	fbgn0260632
GO:0042742	2.883	2	0.78405	1	2	174	175	defense response to bacterium	fbgn0028541,fbgn0011274
GO:0044283	1.54	1	0.7856	1	1	128	128	small molecule biosynthetic process	fbgn0028375
GO:1901681	1.418	1	0.787	1	1	25	27	sulfur compound binding	fbgn0264089
GO:0051297	1.53	1	0.78751	1	1	123	125	centrosome organization	fbgn0000253
GO:0006644	1.523	1	0.78774	1	1	95	96	phospholipid metabolic process	fbgn0026379
GO:0007010	11.028	9	0.78774	1	9	463	478	cytoskeleton organization	fbgn0023081,fbgn0262483,fbgn0014189,fbgn0263929,fbgn0044324,fbgn0001404,fbgn0026379,fbgn0000253,fbgn0003319
GO:0016772	11.074	9	0.78802	1	9	492	516	transferase activity, transferring phosphorus-containing groups	fbgn0023081,fbgn0036142,fbgn0036266,fbgn0031855,fbgn0263395,fbgn0085413,fbgn0022709,fbgn0002891,fbgn0003079
GO:0051173	8.78	7	0.78838	1	7	297	315	positive regulation of nitrogen compound metabolic process	fbgn0032816,fbgn0260632,fbgn0011656,fbgn0086655,fbgn0015269,fbgn0011274,fbgn0005630
GO:0007523	1.319	1	0.78894	1	1	9	9	larval visceral muscle development	fbgn0028369
GO:0051094	4.015	3	0.78992	1	3	92	95	positive regulation of developmental process	fbgn0032816,fbgn0003079,fbgn0259176
GO:1902680	7.653	6	0.79248	1	6	254	265	positive regulation of RNA biosynthetic process	fbgn0032816,fbgn0260632,fbgn0011656,fbgn0086655,fbgn0011274,fbgn0005630
GO:0042221	19.835	17	0.79264	1	17	606	711	response to chemical	fbgn0014141,fbgn0001189,fbgn0050361,fbgn0000636,fbgn0015269,fbgn0038693,fbgn0263395,fbgn0026379,fbgn0000253,fbgn0040726,fbgn0022382,fbgn0266450,fbgn0015721,fbgn0033159,fbgn0044047,fbgn0263782,fbgn0264089
GO:0045202	4.044	3	0.79307	1	3	88	90	synapse	fbgn0000636,fbgn0260632,fbgn0051146
GO:0007264	2.874	2	0.79565	1	2	117	119	small GTPase mediated signal transduction	fbgn0036518,fbgn0015269
GO:0007612	4.092	3	0.79608	1	3	78	108	learning	fbgn0014141,fbgn0000636,fbgn0015269
GO:0031023	1.574	1	0.79659	1	1	127	129	microtubule organizing center organization	fbgn0000253
GO:0005694	2.915	2	0.79807	1	2	167	172	chromosome	fbgn0044324,fbgn0004858
GO:0031324	9.967	8	0.79813	1	8	357	440	negative regulation of cellular metabolic process	fbgn0261823,fbgn0011676,fbgn0010575,fbgn0260632,fbgn0086655,fbgn0010382,fbgn0003079,fbgn0005624
GO:0034330	2.836	2	0.79852	1	2	63	65	cell junction organization	fbgn0001987,fbgn0028369
GO:0045216	2.836	2	0.79852	1	2	63	65	cell-cell junction organization	fbgn0001987,fbgn0028369
GO:0008081	1.475	1	0.79856	1	1	30	31	phosphoric diester hydrolase activity	fbgn0264815
GO:0016482	2.923	2	0.79884	1	2	216	220	cytoplasmic transport	fbgn0014189,fbgn0015298
GO:0001708	2.892	2	0.79893	1	2	69	71	cell fate specification	fbgn0260632,fbgn0010382
GO:0010605	11.098	9	0.79988	1	9	398	495	negative regulation of macromolecule metabolic process	fbgn0261823,fbgn0011676,fbgn0010575,fbgn0260632,fbgn0086655,fbgn0010382,fbgn0004858,fbgn0020306,fbgn0005624
GO:0042803	4.087	3	0.80018	1	3	97	98	protein homodimerization activity	fbgn0015609,fbgn0033159,fbgn0259176
GO:0051254	7.729	6	0.8006	1	6	259	273	positive regulation of RNA metabolic process	fbgn0032816,fbgn0260632,fbgn0011656,fbgn0086655,fbgn0011274,fbgn0005630
GO:0005515	44.326	40	0.80064	1	40	1568	1707	protein binding	fbgn0259745,fbgn0014141,fbgn0011676,fbgn0032816,fbgn0024980,fbgn0037836,fbgn0262018,fbgn0260632,fbgn0011656,fbgn0024836,fbgn0260775,fbgn0010382,fbgn0000464,fbgn0044324,fbgn0032593,fbgn0029082,fbgn0026379,fbgn0040394,fbgn0004858,fbgn0262872,fbgn0020306,fbgn0264815,fbgn0011274,fbgn0000253,fbgn0036105,fbgn0003090,fbgn0261563,fbgn0031773,fbgn0022382,fbgn0028369,fbgn0010278,fbgn0003079,fbgn0015609,fbg…
GO:0007346	2.909	2	0.8025	1	2	196	202	regulation of mitotic cell cycle	fbgn0010382,fbgn0044324
GO:0048519	27.492	24	0.80254	1	24	968	1091	negative regulation of biological process	fbgn0261823,fbgn0014141,fbgn0011676,fbgn0032816,fbgn0010575,fbgn0260632,fbgn0086655,fbgn0024836,fbgn0010382,fbgn0015269,fbgn0033438,fbgn0044324,fbgn0263395,fbgn0026379,fbgn0004858,fbgn0020306,fbgn0000253,fbgn0003090,fbgn0266450,fbgn0003079,fbgn0015609,fbgn0005624,fbgn0021764,fbgn0259176
GO:0048856	42.316	38	0.80336	1	38	1245	1456	anatomical structure development	fbgn0001987,fbgn0261823,fbgn0014141,fbgn0011676,fbgn0005664,fbgn0032816,fbgn0053196,fbgn0010575,fbgn0001992,fbgn0262018,fbgn0000636,fbgn0260632,fbgn0011656,fbgn0086655,fbgn0024836,fbgn0264442,fbgn0010382,fbgn0085424,fbgn0033438,fbgn0000464,fbgn0001404,fbgn0026379,fbgn0004858,fbgn0020306,fbgn0011274,fbgn0261563,fbgn0028369,fbgn0265487,fbgn0003079,fbgn0015609,fbgn0015544,fbgn0033159,fbgn0005630,fbg…
GO:2000112	23.272	20	0.80427	1	20	842	947	regulation of cellular macromolecule biosynthetic process	fbgn0261823,fbgn0011676,fbgn0032816,fbgn0010575,fbgn0260632,fbgn0011656,fbgn0086655,fbgn0010382,fbgn0085424,fbgn0040765,fbgn0040394,fbgn0011274,fbgn0000376,fbgn0266450,fbgn0024321,fbgn0003079,fbgn0005624,fbgn0005630,fbgn0033166,fbgn0259176
GO:0010556	23.272	20	0.80427	1	20	842	947	regulation of macromolecule biosynthetic process	fbgn0261823,fbgn0011676,fbgn0032816,fbgn0010575,fbgn0260632,fbgn0011656,fbgn0086655,fbgn0010382,fbgn0085424,fbgn0040765,fbgn0040394,fbgn0011274,fbgn0000376,fbgn0266450,fbgn0024321,fbgn0003079,fbgn0005624,fbgn0005630,fbgn0033166,fbgn0259176
GO:0009953	2.901	2	0.80555	1	2	76	80	dorsal/ventral pattern formation	fbgn0010575,fbgn0260632
GO:0006030	1.756	1	0.80722	1	1	120	122	chitin metabolic process	fbgn0032598
GO:0007067	1.584	1	0.80853	1	1	102	128	mitosis	fbgn0014141
GO:0007528	2.898	2	0.80895	1	2	69	72	neuromuscular junction development	fbgn0000464,fbgn0051146
GO:1902531	7.774	6	0.80952	1	6	211	218	regulation of intracellular signal transduction	fbgn0035761,fbgn0032816,fbgn0015269,fbgn0263395,fbgn0026379,fbgn0043070
GO:0004857	1.785	1	0.81172	1	1	119	121	enzyme inhibitor activity	fbgn0264815
GO:0006996	21.322	18	0.81354	1	18	1125	1395	organelle organization	fbgn0261823,fbgn0014141,fbgn0023081,fbgn0262483,fbgn0265194,fbgn0014189,fbgn0263929,fbgn0044324,fbgn0001404,fbgn0263395,fbgn0026379,fbgn0262872,fbgn0020306,fbgn0000253,fbgn0036105,fbgn0265487,fbgn0005624,fbgn0003319
GO:0048477	7.82	6	0.81435	1	6	220	318	oogenesis	fbgn0010382,fbgn0033438,fbgn0000464,fbgn0001404,fbgn0020306,fbgn0259176
GO:0007292	7.82	6	0.81435	1	6	220	319	female gamete generation	fbgn0010382,fbgn0033438,fbgn0000464,fbgn0001404,fbgn0020306,fbgn0259176
GO:0008045	4.196	3	0.81449	1	3	56	58	motor neuron axon guidance	fbgn0014141,fbgn0261509,fbgn0000464
GO:0006464	14.748	12	0.81477	1	12	719	753	cellular protein modification process	fbgn0261823,fbgn0023081,fbgn0000464,fbgn0031855,fbgn0263395,fbgn0026379,fbgn0000253,fbgn0031773,fbgn0022382,fbgn0014075,fbgn0003079,fbgn0260941
GO:0036211	14.748	12	0.81477	1	12	719	753	protein modification process	fbgn0261823,fbgn0023081,fbgn0000464,fbgn0031855,fbgn0263395,fbgn0026379,fbgn0000253,fbgn0031773,fbgn0022382,fbgn0014075,fbgn0003079,fbgn0260941
GO:0060541	5.458	4	0.81488	1	4	109	111	respiratory system development	fbgn0053196,fbgn0086655,fbgn0033438,fbgn0004858
GO:0007424	5.458	4	0.81488	1	4	109	111	open tracheal system development	fbgn0053196,fbgn0086655,fbgn0033438,fbgn0004858
GO:0016477	11.283	9	0.81507	1	9	236	305	cell migration	fbgn0001987,fbgn0260632,fbgn0086655,fbgn0264442,fbgn0001404,fbgn0003079,fbgn0263782,fbgn0259176,fbgn0264089
GO:0071702	6.83	5	0.81698	1	5	464	468	organic substance transport	fbgn0014189,fbgn0001404,fbgn0015298,fbgn0050394,fbgn0050277
GO:1901185	1.544	1	0.81801	1	1	30	33	negative regulation of ERBB signaling pathway	fbgn0263395
GO:0042059	1.544	1	0.81801	1	1	30	33	negative regulation of epidermal growth factor receptor signaling pathway	fbgn0263395
GO:2000113	7.889	6	0.81925	1	6	261	343	negative regulation of cellular macromolecule biosynthetic process	fbgn0261823,fbgn0011676,fbgn0010575,fbgn0260632,fbgn0086655,fbgn0005624
GO:0010558	7.889	6	0.81925	1	6	261	343	negative regulation of macromolecule biosynthetic process	fbgn0261823,fbgn0011676,fbgn0010575,fbgn0260632,fbgn0086655,fbgn0005624
GO:0004222	1.714	1	0.82113	1	1	80	81	metalloendopeptidase activity	fbgn0033438
GO:0031326	24.647	21	0.82244	1	21	890	999	regulation of cellular biosynthetic process	fbgn0261823,fbgn0011676,fbgn0032816,fbgn0010575,fbgn0260632,fbgn0011656,fbgn0086655,fbgn0010382,fbgn0085424,fbgn0015269,fbgn0040765,fbgn0040394,fbgn0011274,fbgn0000376,fbgn0266450,fbgn0024321,fbgn0003079,fbgn0005624,fbgn0005630,fbgn0033166,fbgn0259176
GO:0009889	24.654	21	0.82285	1	21	891	1000	regulation of biosynthetic process	fbgn0261823,fbgn0011676,fbgn0032816,fbgn0010575,fbgn0260632,fbgn0011656,fbgn0086655,fbgn0010382,fbgn0085424,fbgn0015269,fbgn0040765,fbgn0040394,fbgn0011274,fbgn0000376,fbgn0266450,fbgn0024321,fbgn0003079,fbgn0005624,fbgn0005630,fbgn0033166,fbgn0259176
GO:0045926	3.033	2	0.82288	1	2	82	83	negative regulation of growth	fbgn0015269,fbgn0026379
GO:0005886	18.072	15	0.82323	1	15	402	423	plasma membrane	fbgn0001987,fbgn0262476,fbgn0035400,fbgn0024980,fbgn0262018,fbgn0000636,fbgn0024836,fbgn0033438,fbgn0000464,fbgn0029082,fbgn0004509,fbgn0040726,fbgn0028369,fbgn0015609,fbgn0003319
GO:0009617	3.177	2	0.82531	1	2	191	193	response to bacterium	fbgn0028541,fbgn0011274
GO:0044432	1.764	1	0.82558	1	1	125	126	endoplasmic reticulum part	fbgn0263782
GO:0007169	4.344	3	0.82569	1	3	114	118	transmembrane receptor protein tyrosine kinase signaling pathway	fbgn0026379,fbgn0003079,fbgn0044047
GO:0009891	9.185	7	0.82694	1	7	310	325	positive regulation of biosynthetic process	fbgn0032816,fbgn0260632,fbgn0011656,fbgn0086655,fbgn0015269,fbgn0011274,fbgn0005630
GO:0031328	9.185	7	0.82694	1	7	310	325	positive regulation of cellular biosynthetic process	fbgn0032816,fbgn0260632,fbgn0011656,fbgn0086655,fbgn0015269,fbgn0011274,fbgn0005630
GO:0050829	1.668	1	0.82727	1	1	92	93	defense response to Gram-negative bacterium	fbgn0028541
GO:0043228	12.71	10	0.82846	1	10	789	891	non-membrane-bounded organelle	fbgn0035401,fbgn0027560,fbgn0262483,fbgn0020236,fbgn0263929,fbgn0044324,fbgn0004858,fbgn0000253,fbgn0013686,fbgn0010278
GO:0043232	12.71	10	0.82846	1	10	789	891	intracellular non-membrane-bounded organelle	fbgn0035401,fbgn0027560,fbgn0262483,fbgn0020236,fbgn0263929,fbgn0044324,fbgn0004858,fbgn0000253,fbgn0013686,fbgn0010278
GO:0007522	1.524	1	0.82866	1	1	15	15	visceral muscle development	fbgn0028369
GO:0006810	30.282	26	0.82917	1	26	1472	1514	transport	fbgn0262476,fbgn0035400,fbgn0035763,fbgn0035762,fbgn0052091,fbgn0028541,fbgn0024980,fbgn0265194,fbgn0028875,fbgn0014189,fbgn0037238,fbgn0001404,fbgn0038691,fbgn0032593,fbgn0262872,fbgn0015872,fbgn0013672,fbgn0013673,fbgn0015298,fbgn0015721,fbgn0050394,fbgn0050277,fbgn0034911,fbgn0010549,fbgn0033159,fbgn0031571
GO:0044459	18.225	15	0.82924	1	15	452	465	plasma membrane part	fbgn0052091,fbgn0050361,fbgn0262018,fbgn0000636,fbgn0028645,fbgn0024836,fbgn0028875,fbgn0001404,fbgn0038691,fbgn0029082,fbgn0015609,fbgn0010549,fbgn0033159,fbgn0021764,fbgn0031449
GO:0005856	3.038	2	0.82949	1	2	74	77	cytoskeleton	fbgn0262483,fbgn0263929
GO:0007498	3.092	2	0.82958	1	2	73	74	mesoderm development	fbgn0260632,fbgn0011656
GO:0007173	1.637	1	0.82975	1	1	35	37	epidermal growth factor receptor signaling pathway	fbgn0003079
GO:0038127	1.637	1	0.82975	1	1	35	37	ERBB signaling pathway	fbgn0003079
GO:0090407	3.205	2	0.82977	1	2	152	156	organophosphate biosynthetic process	fbgn0013672,fbgn0013673
GO:0098590	3.097	2	0.83102	1	2	74	74	plasma membrane region	fbgn0000636,fbgn0029082
GO:0044765	27.089	23	0.8313	1	23	1289	1330	single-organism transport	fbgn0262476,fbgn0035400,fbgn0035763,fbgn0035762,fbgn0028541,fbgn0024980,fbgn0265194,fbgn0028875,fbgn0037238,fbgn0001404,fbgn0038691,fbgn0032593,fbgn0262872,fbgn0015872,fbgn0013672,fbgn0013673,fbgn0015298,fbgn0050394,fbgn0050277,fbgn0034911,fbgn0010549,fbgn0033159,fbgn0031571
GO:0044057	1.699	1	0.83147	1	1	35	36	regulation of system process	fbgn0011676
GO:0048646	11.559	9	0.83458	1	9	385	451	anatomical structure formation involved in morphogenesis	fbgn0011656,fbgn0263929,fbgn0033438,fbgn0001404,fbgn0029082,fbgn0013686,fbgn0028369,fbgn0259176,fbgn0264089
GO:0036094	23.83	20	0.8346	1	20	1158	1186	small molecule binding	fbgn0011676,fbgn0052091,fbgn0023081,fbgn0020236,fbgn0014189,fbgn0025628,fbgn0038565,fbgn0031855,fbgn0263395,fbgn0020306,fbgn0036104,fbgn0022709,fbgn0002891,fbgn0003079,fbgn0034356,fbgn0027094,fbgn0010549,fbgn0263782,fbgn0003435,fbgn0031449
GO:0048870	11.533	9	0.83492	1	9	247	318	cell motility	fbgn0001987,fbgn0260632,fbgn0086655,fbgn0264442,fbgn0001404,fbgn0003079,fbgn0263782,fbgn0259176,fbgn0264089
GO:0007178	1.66	1	0.8359	1	1	34	41	transmembrane receptor protein serine/threonine kinase signaling pathway	fbgn0259176
GO:0007218	1.751	1	0.83697	1	1	58	59	neuropeptide signaling pathway	fbgn0024836
GO:0034332	1.629	1	0.83699	1	1	30	30	adherens junction organization	fbgn0028369
GO:0003774	1.775	1	0.83724	1	1	76	86	motor activity	fbgn0034106
GO:0035023	1.686	1	0.83836	1	1	27	28	regulation of Rho protein signal transduction	fbgn0035761
GO:0007605	1.76	1	0.83892	1	1	55	61	sensory perception of sound	fbgn0000253
GO:0009890	8.112	6	0.83918	1	6	268	350	negative regulation of biosynthetic process	fbgn0261823,fbgn0011676,fbgn0010575,fbgn0260632,fbgn0086655,fbgn0005624
GO:0031327	8.112	6	0.83918	1	6	268	350	negative regulation of cellular biosynthetic process	fbgn0261823,fbgn0011676,fbgn0010575,fbgn0260632,fbgn0086655,fbgn0005624
GO:0006357	10.519	8	0.84017	1	8	379	393	regulation of transcription from RNA polymerase II promoter	fbgn0010575,fbgn0260632,fbgn0011656,fbgn0086655,fbgn0085424,fbgn0011274,fbgn0003079,fbgn0005630
GO:0046983	6.906	5	0.84033	1	5	239	329	protein dimerization activity	fbgn0032816,fbgn0011656,fbgn0015609,fbgn0033159,fbgn0259176
GO:0016324	1.768	1	0.84103	1	1	46	46	apical plasma membrane	fbgn0029082
GO:0009952	1.744	1	0.84126	1	1	42	49	anterior/posterior pattern specification	fbgn0260632
GO:0043412	15.164	12	0.84235	1	12	769	803	macromolecule modification	fbgn0261823,fbgn0023081,fbgn0000464,fbgn0031855,fbgn0263395,fbgn0026379,fbgn0000253,fbgn0031773,fbgn0022382,fbgn0014075,fbgn0003079,fbgn0260941
GO:0010557	8.182	6	0.84235	1	6	275	286	positive regulation of macromolecule biosynthetic process	fbgn0032816,fbgn0260632,fbgn0011656,fbgn0086655,fbgn0011274,fbgn0005630
GO:0005231	1.758	1	0.84436	1	1	52	55	excitatory extracellular ligand-gated ion channel activity	fbgn0028875
GO:0048640	1.784	1	0.84541	1	1	49	49	negative regulation of developmental growth	fbgn0015269
GO:0007610	20.732	17	0.84729	1	17	518	713	behavior	fbgn0014141,fbgn0024980,fbgn0050361,fbgn0010575,fbgn0000636,fbgn0011656,fbgn0015269,fbgn0001404,fbgn0038693,fbgn0263395,fbgn0264815,fbgn0040726,fbgn0022382,fbgn0265487,fbgn0005630,fbgn0263782,fbgn0003435
GO:0045995	1.807	1	0.84758	1	1	72	77	regulation of embryonic development	fbgn0261563
GO:0045179	1.761	1	0.84876	1	1	29	29	apical cortex	fbgn0260941
GO:0022607	12.889	10	0.84935	1	10	504	632	cellular component assembly	fbgn0001987,fbgn0011676,fbgn0263929,fbgn0038565,fbgn0000464,fbgn0262872,fbgn0028369,fbgn0034915,fbgn0051146,fbgn0003319
GO:0009880	3.251	2	0.84974	1	2	103	124	embryonic pattern specification	fbgn0260632,fbgn0003079
GO:0003677	16.394	13	0.84977	1	13	706	861	DNA binding	fbgn0261823,fbgn0032816,fbgn0260632,fbgn0011656,fbgn0085424,fbgn0040765,fbgn0020306,fbgn0011274,fbgn0265487,fbgn0002891,fbgn0024321,fbgn0010278,fbgn0005624
GO:0006950	16.44	13	0.84998	1	13	893	928	response to stress	fbgn0011676,fbgn0028541,fbgn0260632,fbgn0010382,fbgn0015269,fbgn0033438,fbgn0263395,fbgn0026379,fbgn0011274,fbgn0261565,fbgn0002891,fbgn0003079,fbgn0033166
GO:0044705	4.525	3	0.85021	1	3	121	149	multi-organism reproductive behavior	fbgn0001404,fbgn0264815,fbgn0265487
GO:0051128	17.4	14	0.85065	1	14	545	559	regulation of cellular component organization	fbgn0035761,fbgn0023081,fbgn0024836,fbgn0010382,fbgn0015269,fbgn0000464,fbgn0044324,fbgn0026379,fbgn0028369,fbgn0266450,fbgn0010278,fbgn0015609,fbgn0033159,fbgn0259176
GO:0009719	4.568	3	0.85119	1	3	132	137	response to endogenous stimulus	fbgn0026379,fbgn0022382,fbgn0044047
GO:0019098	4.54	3	0.85159	1	3	123	151	reproductive behavior	fbgn0001404,fbgn0264815,fbgn0265487
GO:1901071	2.009	1	0.85322	1	1	129	131	glucosamine-containing compound metabolic process	fbgn0032598
GO:0007447	4.574	3	0.85322	1	3	100	105	imaginal disc pattern formation	fbgn0010575,fbgn0086655,fbgn0020306
GO:0032403	3.305	2	0.85339	1	2	134	140	protein complex binding	fbgn0010278,fbgn0044047
GO:0070727	1.857	1	0.85418	1	1	95	117	cellular macromolecule localization	fbgn0026379
GO:0009886	20.81	17	0.85476	1	17	413	458	post-embryonic morphogenesis	fbgn0261823,fbgn0053196,fbgn0010575,fbgn0000636,fbgn0036518,fbgn0086655,fbgn0033438,fbgn0026379,fbgn0011274,fbgn0003090,fbgn0261563,fbgn0265487,fbgn0003079,fbgn0260941,fbgn0015544,fbgn0003319,fbgn0259176
GO:0043235	1.821	1	0.85498	1	1	42	44	receptor complex	fbgn0028875
GO:0051050	1.868	1	0.85525	1	1	82	82	positive regulation of transport	fbgn0000253
GO:0006040	2.024	1	0.85526	1	1	130	132	amino sugar metabolic process	fbgn0032598
GO:0050954	1.868	1	0.85546	1	1	66	74	sensory perception of mechanical stimulus	fbgn0000253
GO:0005089	1.806	1	0.85594	1	1	28	28	Rho guanyl-nucleotide exchange factor activity	fbgn0035761
GO:0005875	5.968	4	0.85686	1	4	361	374	microtubule associated complex	fbgn0034106,fbgn0014189,fbgn0000464,fbgn0000253
GO:0002121	3.197	2	0.8569	1	2	50	60	inter-male aggressive behavior	fbgn0024980,fbgn0005630
GO:0048859	1.849	1	0.86	1	1	30	32	formation of anatomical boundary	fbgn0264089
GO:0009996	1.776	1	0.86052	1	1	22	22	negative regulation of cell fate specification	fbgn0259176
GO:0010454	1.776	1	0.86052	1	1	22	22	negative regulation of cell fate commitment	fbgn0259176
GO:0019752	3.581	2	0.86119	1	2	319	322	carboxylic acid metabolic process	fbgn0020236,fbgn0027094
GO:1901136	2.002	1	0.86124	1	1	101	103	carbohydrate derivative catabolic process	fbgn0038565
GO:0032879	8.398	6	0.86169	1	6	263	266	regulation of localization	fbgn0000464,fbgn0026379,fbgn0000253,fbgn0261563,fbgn0015609,fbgn0264089
GO:0009790	3.296	2	0.8619	1	2	90	144	embryo development	fbgn0000464,fbgn0265487
GO:0051493	3.33	2	0.86213	1	2	97	101	regulation of cytoskeleton organization	fbgn0035761,fbgn0023081
GO:0007423	8.417	6	0.86219	1	6	238	260	sensory organ development	fbgn0261823,fbgn0032816,fbgn0001992,fbgn0264442,fbgn0010382,fbgn0259176
GO:0005230	1.887	1	0.86288	1	1	59	62	extracellular ligand-gated ion channel activity	fbgn0028875
GO:0035222	3.32	2	0.86318	1	2	70	75	wing disc pattern formation	fbgn0010575,fbgn0020306
GO:0001700	1.853	1	0.86402	1	1	47	93	embryonic development via the syncytial blastoderm	fbgn0000464
GO:0007269	1.916	1	0.8642	1	1	94	99	neurotransmitter secretion	fbgn0024980
GO:0050808	4.627	3	0.8648	1	3	97	100	synapse organization	fbgn0011676,fbgn0000464,fbgn0051146
GO:0023061	1.922	1	0.86503	1	1	95	100	signal release	fbgn0024980
GO:1901566	3.483	2	0.86508	1	2	205	210	organonitrogen compound biosynthetic process	fbgn0013672,fbgn0013673
GO:0044255	3.468	2	0.86552	1	2	234	235	cellular lipid metabolic process	fbgn0026379,fbgn0263782
GO:0097060	1.801	1	0.86621	1	1	26	30	synaptic membrane	fbgn0028875
GO:0009798	3.403	2	0.86677	1	2	127	157	axis specification	fbgn0260632,fbgn0003079
GO:0044703	4.696	3	0.86735	1	3	133	168	multi-organism reproductive process	fbgn0001404,fbgn0264815,fbgn0265487
GO:0032880	1.963	1	0.8689	1	1	77	78	regulation of protein localization	fbgn0000253
GO:0007507	3.392	2	0.86966	1	2	61	62	heart development	fbgn0260632,fbgn0011656
GO:0042802	4.689	3	0.86984	1	3	109	110	identical protein binding	fbgn0015609,fbgn0033159,fbgn0259176
GO:0030537	1.929	1	0.87115	1	1	43	56	larval behavior	fbgn0010575
GO:0045570	1.896	1	0.87173	1	1	29	30	regulation of imaginal disc growth	fbgn0010575
GO:0009792	1.911	1	0.87184	1	1	52	103	embryo development ending in birth or egg hatching	fbgn0000464
GO:0007608	1.946	1	0.87227	1	1	86	87	sensory perception of smell	fbgn0015721
GO:0007167	6.053	4	0.87343	1	4	149	160	enzyme linked receptor protein signaling pathway	fbgn0026379,fbgn0003079,fbgn0044047,fbgn0259176
GO:0032318	1.964	1	0.87384	1	1	63	63	regulation of Ras GTPase activity	fbgn0051935
GO:0006979	2.018	1	0.87498	1	1	93	94	response to oxidative stress	fbgn0015269
GO:0065003	3.525	2	0.87526	1	2	241	353	macromolecular complex assembly	fbgn0038565,fbgn0034915
GO:0005700	2.025	1	0.87581	1	1	116	119	polytene chromosome	fbgn0044324
GO:0009605	15.663	12	0.87633	1	12	516	565	response to external stimulus	fbgn0028541,fbgn0000636,fbgn0011656,fbgn0032593,fbgn0026379,fbgn0011274,fbgn0261565,fbgn0003079,fbgn0033159,fbgn0005630,fbgn0263782,fbgn0264089
GO:0007480	3.458	2	0.878	1	2	59	59	imaginal disc-derived leg morphogenesis	fbgn0036518,fbgn0260941
[truncated: 213 more rows]

## Sheet: C2 GO enrichment
GO:0005739	2.882	28	1e-05	0.0043425	28	298	304	mitochondrion	fbgn0013694,fbgn0013695,fbgn0013697,fbgn0013691,fbgn0013692,fbgn0013693,fbgn0013698,fbgn0013699,fbgn0013683,fbgn0013684,fbgn0013685,fbgn0013686,fbgn0013681,fbgn0013689,fbgn0013672,fbgn0013673,fbgn0013674,fbgn0013675,fbgn0013676,fbgn0013679,fbgn0086384,fbgn0013702,fbgn0013704,fbgn0013705,fbgn0013701,fbgn0013706,fbgn0013707,fbgn0262952
[truncated: 1,786 more rows]

[truncated: 10 more sheets: C3 GO enrichment, C4 GO enrichment, C5 GO enrichment, D1 GO enrichment, D2 GO enrichment, D3 GO enrichment, D4 GO enrichment, D5 GO enrichment,  eQTL and veQTL GO enrichment, Lab-adaptation genes GO enrichm]
