# Supplementary material for: Genomic Trajectories to Desiccation Resistance: Convergence and Divergence Among Replicate Selected Drosophila Lines
Source: Oxford University Press journal article supplement (doi:10.1534/genetics.116.187104), 2016-12-23
Supplement: tables1.xlsx [file tables1.xlsx]

## Sheet: Sheet1
Library	Total Reads (R1 + R2) from first sequencing run of 8 lanes	Total Reads (R1 + R2) from extra sequencing lane 1	Total Reads (R1 + R2) from extra sequencing lane 2	Total raw reads	Mean depth of coverage (across repeat-masked genome, only reads with a quality score of 20 or above counted)	median depth of coverage	granular 3rd quantile	granular 1st quantile	Total SNPs called with respect to MB	Bonferroni-corrected alpha	Number of candidate SNPs (FET only)	Number of candidate SNPs (FET, drift and Lynch tests)	Number of candidate SNPs excluding those within 1000 bp of a putative lab-adaptation gene	Number of candidate genes (at least 1 SNP within 1000 bp)	Number of candidate genes excluding putative lab-adaptation genes (includes non-coding genes)	Number of nodes in zero-order PPI network	Number of edges in zero-order PPI network	Number of nodes in expanded network	Number of edges in expanded network
C1.13	107472998			107472998	52.95	55	68	41	2888628	3.46e-13	295	259	NA	245	NA	27	18	127	738
C2.13	74244760			74244760	38.03	39	50	29	2814924	3.55e-13	180	170	NA	177	NA	24	19	99	520
C3.13	71546220			71546220	35.32	37	45	28	2806047	3.56e-13	189	186	NA	202	NA	26	18	110	660
C4.13	61918094			61918094	30.85	32	39	25	2797111	3.58e-13	114	87	NA	77	NA	7	5	25	48
C5.13	64090500			64090500	32.77	34	42	26	2797155	3.58e-13	140	117	NA	127	NA	4	2	61	268
D1.13	79676834			79676834	41.21	44	53	33	2815187	3.55e-13	3147	3114	2657	1763	1622	570	942	1243	19850
D2.13	35995512	40731748		76727260	22.02	23	29	17	2712254	3.69e-13	1054	1022	819	627	543	168	192	367	2760
D3.13	50127610	4963328	116935914	172026852	67.02	70	82	56	2889638	3.46e-13	28012	27961	25125	6250	5875	3102	13839	4741	241686
D4.13	169658792			169658792	71.95	75	90	58	2984067	3.35e-13	17701	17663	15004	4746	4397	2006	7574	3435	130056
D5.13	19918568	5780360	91143824	116842752	35.54	37	44	30	2803570	3.57e-13	1784	1748	1602	980	896	281	394	646	6638
MB1	34362588	4672910	78282830	117318328
MB2	55722708	9051788		64774496
MB3	56025516	14375406		70400922
MB4	67116818			67116818
MB (4 pools downsampled and merged)	NA	NA	NA	NA	124.82	130	154	103	NA
