# Supplementary material for: Genomic Trajectories to Desiccation Resistance: Convergence and Divergence Among Replicate Selected Drosophila Lines
Source: Oxford University Press journal article supplement (doi:10.1534/genetics.116.187104), 2016-12-23
Supplement: tables2.docx [file tables2.docx]

|  |  |  | True Positive Rate | |  | False Positive Rate short range ~10Kbp | |  | False Positive Rate long range ~1Mbp | |
| --- | --- | --- | --- | --- | --- | --- | --- | --- | --- | --- |
| *Heritability* | *Chr.* |  | *mean* | *(sd)* |  | *mean* | *(sd)* |  | *mean* | *(sd)* |
| 0.01 | 2L |  | 0.439 | (0.577) |  | 0.016 | (0.167) |  | 0.031 | (0.313) |
|  | 2R |  | 0.459 | (0.608) |  | 0.021 | (0.186) |  | 0.042 | (0.458) |
|  | 3L |  | 0.437 | (0.588) |  | 0.018 | (0.193) |  | 0.027 | (0.435) |
|  | 3R |  | 0.449 | (0.6) |  | 0.019 | (0.187) |  | 0.031 | (0.377) |
|  | All |  | 0.446 | (0.594) |  | 0.019 | (0.184) |  | 0.033 | (0.4) |
| 0.001 | 2L |  | 0.004 | (0.066) |  | 0.001 | (0.036) |  | 0.005 | (0.092) |
|  | 2R |  | 0.006 | (0.079) |  | 0.001 | (0.03) |  | 0.01 | (0.193) |
|  | 3L |  | 0.005 | (0.071) |  | 0.001 | (0.028) |  | 0.008 | (0.192) |
|  | 3R |  | 0.005 | (0.077) |  | 0.001 | (0.035) |  | 0.008 | (0.164) |
|  | All |  | 0.005 | (0.074) |  | 0.001 | (0.033) |  | 0.008 | (0.166) |
