# Supplementary material for: Genomic Trajectories to Desiccation Resistance: Convergence and Divergence Among Replicate Selected Drosophila Lines
Source: Oxford University Press journal article supplement (doi:10.1534/genetics.116.187104), 2016-12-23
Supplement: tables3.xlsx [file tables3.xlsx]

## Sheet: Sheet1
Inversion	Reference	Chr	Pos (v6)	Allele diagnostic of inversion	MB freq	C1 freq	C2 freq	C3 freq	C4 freq	C5 freq	D1 freq	D2 freq	D3 freq	D4 freq	D5 freq
In(3R)P	Anderson et al. 2005	3R	16428073	C	0.21	0.13	0.08	0	0.09	0.13	0	0	0	0.03	0.14
In(3R)P	Kapun et al. 2014	3R	16432161	G	0.17	0.06	0.18	0.08	0.08	0.17	0.04	0	0	0.07	0.24
In(3R)P	Kapun et al. 2014	3R	16433411	C	0.06	0.06	0.06	0.03	0.03	0	0	0	0	0.08	0.1
In(2L)t	Kapun et al. 2014	2L	2166548	A	0.12	0.04	0.07	0.05	0.21	0.04	0.47	0.49	0.42	0.14	0.03
In(2L)t	Kapun et al. 2014	2L	2166622	G	0.14	0.08	0	0.06	0.15	0.07	0.53	0.35	0.33	0.15	0.11
In(2L)t	Andolfatto et al. 1999	2L	13152598	T	0.05	0.06	0.05	0	0.18	0.05	0.31	0.36	0.38	0.06	0.21
In(2L)t	Andolfatto et al. 1999	2L	13154297	A	na	na	na	na	na	na	na	na	na	na	na
In(2L)t	Andolfatto et al. 1999	2L	13155234	A	0.13	0.04	0.09	0	0.12	0.21	0.35	0.12	0.2	0.16	0.05
In(2R)Ns	Kapun et al. 2014	2R	15392132	A	0.05	0.15	0.02	0	0.04	0.21	0.02	0	0	0.01	0.06
In(2R)Ns	Kapun et al. 2014	2R	15403821	A	0.04	0.15	0.02	0	0.03	0.41	0	0	0.01	0.01	0.03
In(3L)P	Kapun et al. 2014	3L	2759715	C	na	na	na	na	na	na	na	na	na	na	na
In(3L)P	Kapun et al. 2014	3L	2760784	T	na	na	na	na	na	na	na	na	na	na	na
In(3L)P	Kapun et al. 2014	3L	3054925	T	na	na	na	na	na	na	na	na	na	na	na
In(3R)C	Kapun et al. 2014	3R	17289004	T	0.03	0	0	0.02	0	0.17	0.07	0	0.03	0	0
In(3R)C	Kapun et al. 2014	3R	20273429	G	0.01	0.03	0.03	0	0.04	0	0	0	0	0	0
In(3R)K	Kapun et al. 2014	3R	11743869	G	na	na	na	na	na	na	na	na	na	na	na
In(3R)K	Kapun et al. 2014	3R	11761436	A	na	na	na	na	na	na	na	na	na	na	na
In(3R)K	Kapun et al. 2014	3R	11937825	T	na	na	na	na	na	na	na	na	na	na	na
In(3R)Mo	Kapun et al. 2014	3R	20129648	C	0.02	0	0	0	0.17	0.08	0.11	0.04	0	0	0
In(3R)Mo	Kapun et al. 2014	3R	20130483	G	na	na	na	na	na	na	na	na	na	na	na
In(3R)Mo	Kapun et al. 2014	3R	20186930	A	na	na	na	na	na	na	na	na	na	na	na
