# Supplementary figures and images for: Genomic Trajectories to Desiccation Resistance: Convergence and Divergence Among Replicate Selected Drosophila Lines
Source: Oxford University Press journal article supplement (doi:10.1534/genetics.116.187104), 2016-12-23

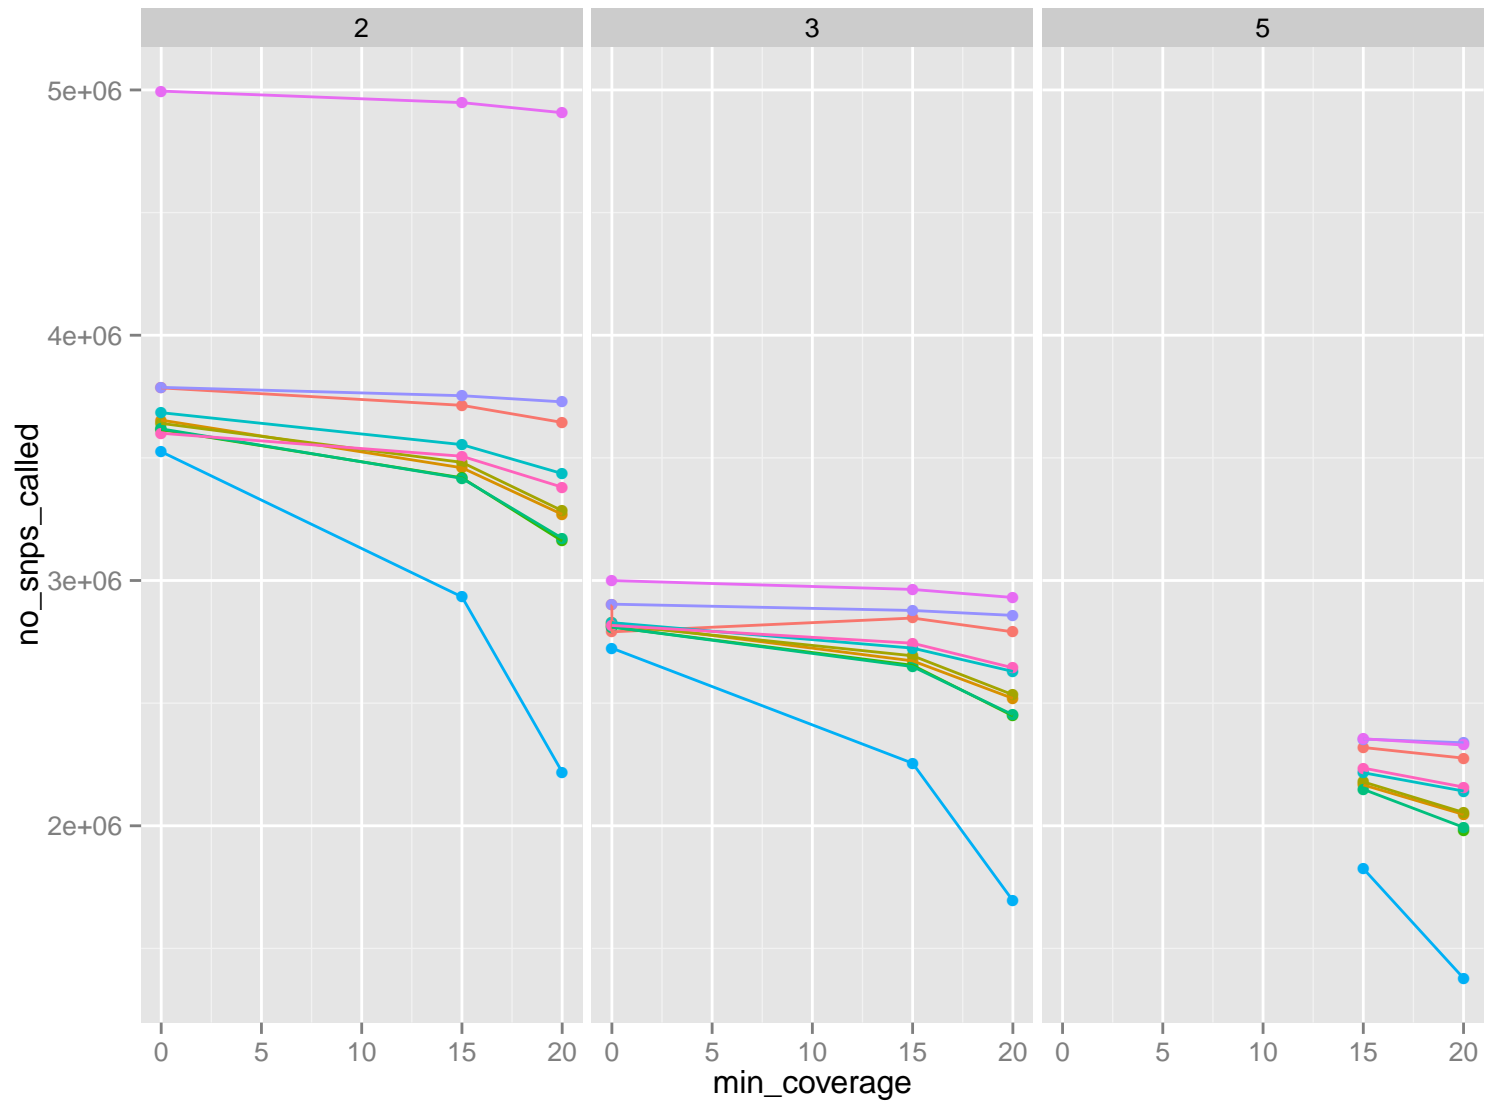

Supplement: figures1.pdf [file figures1.pdf]

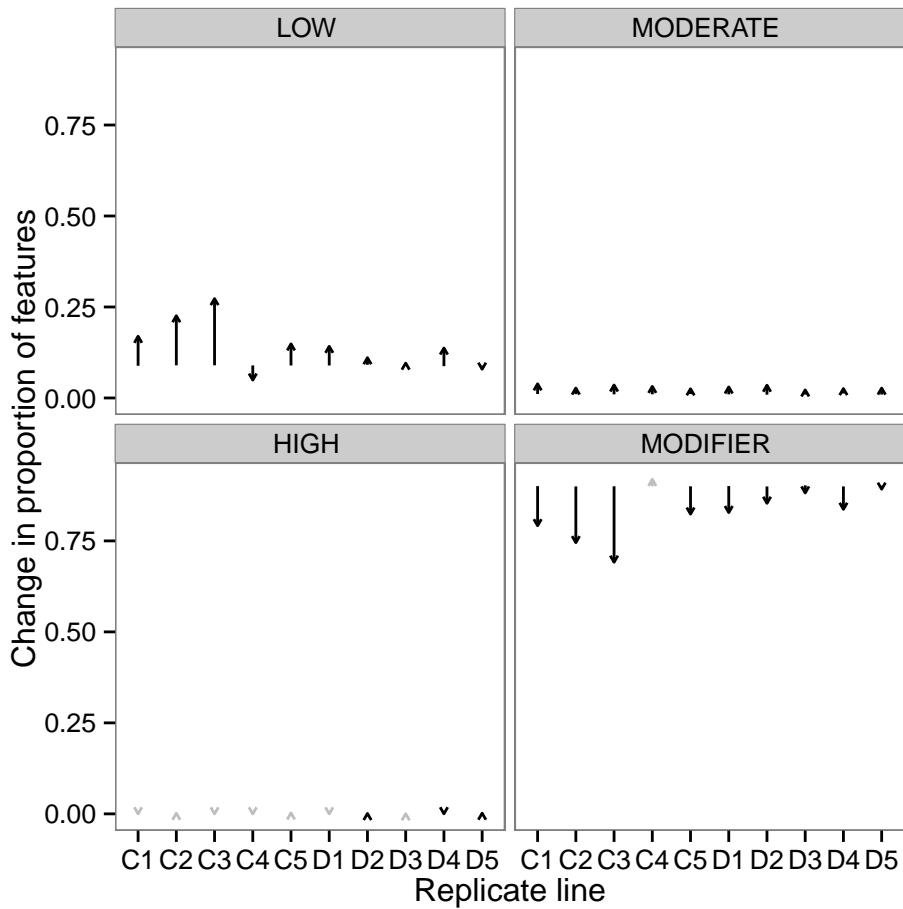

Supplement: figures10.pdf [file figures10.pdf]

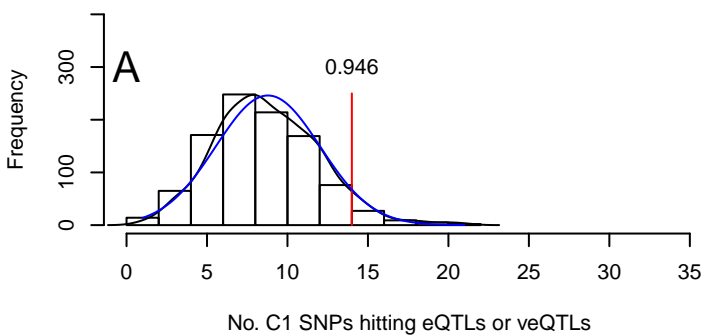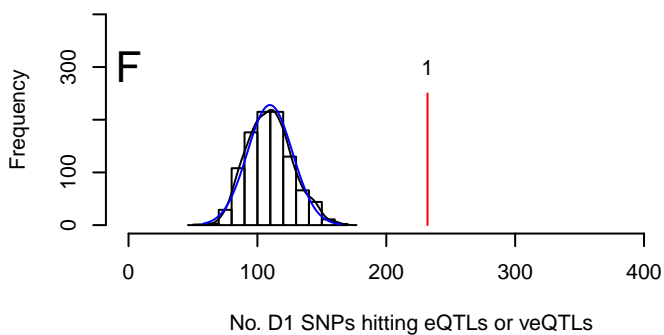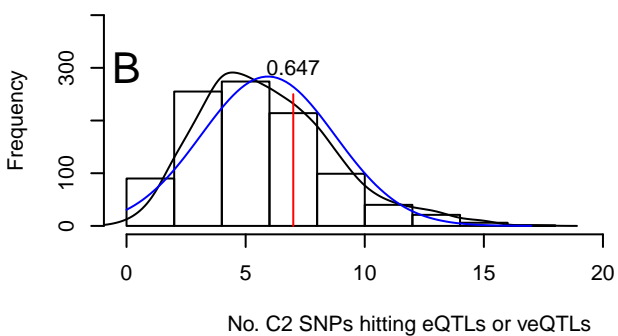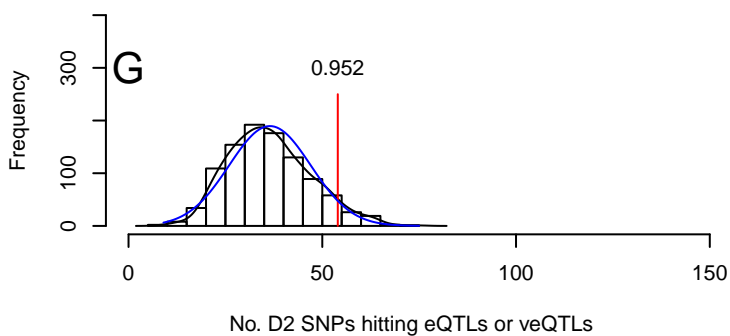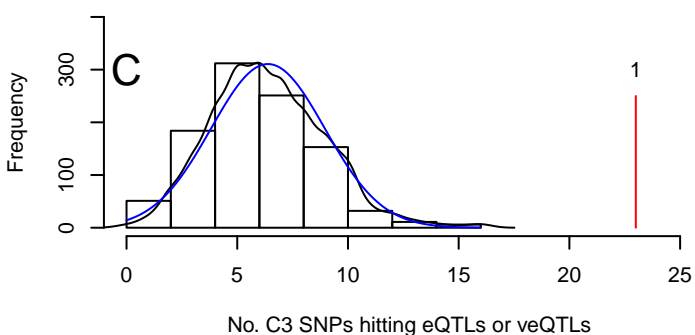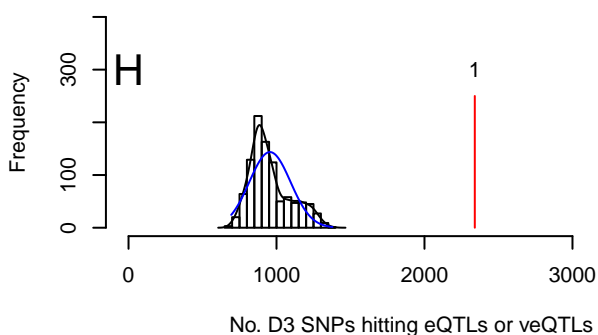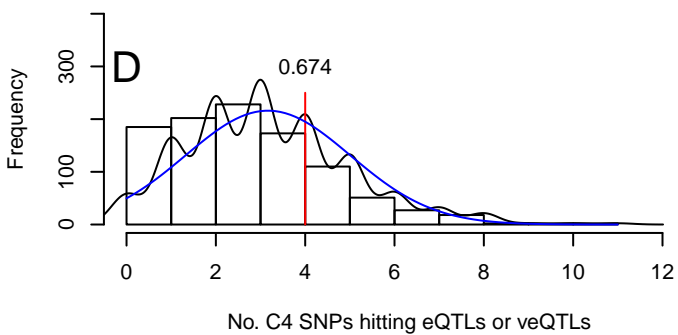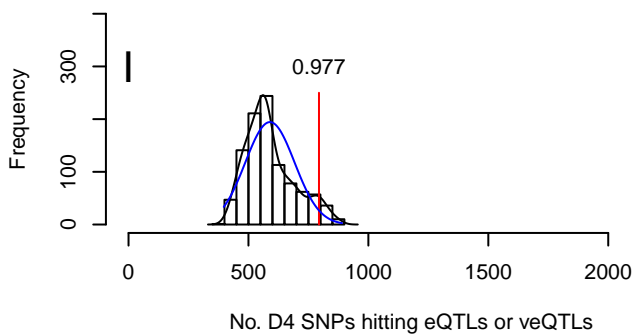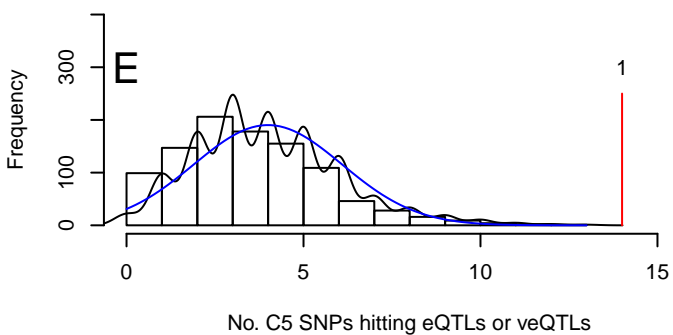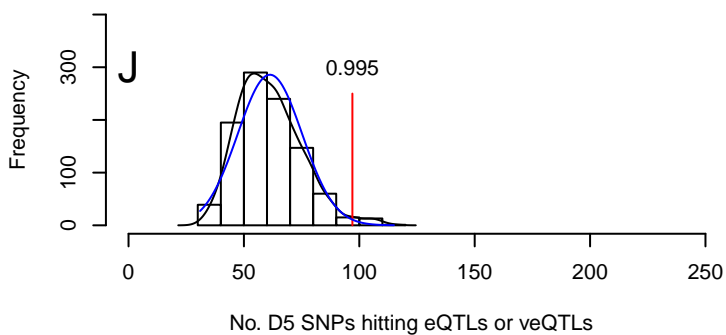

Supplement: figures11.pdf [file figures11.pdf]

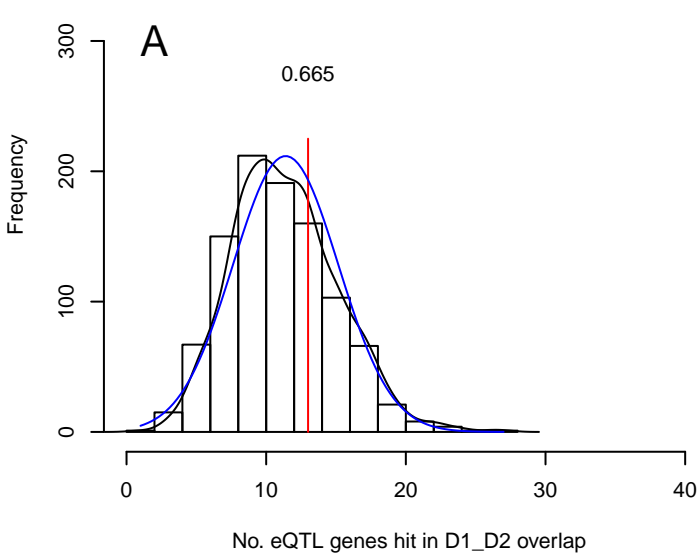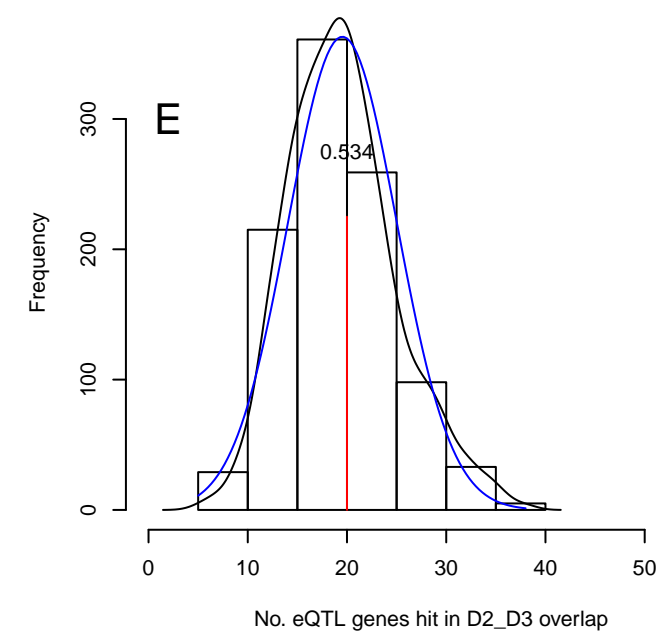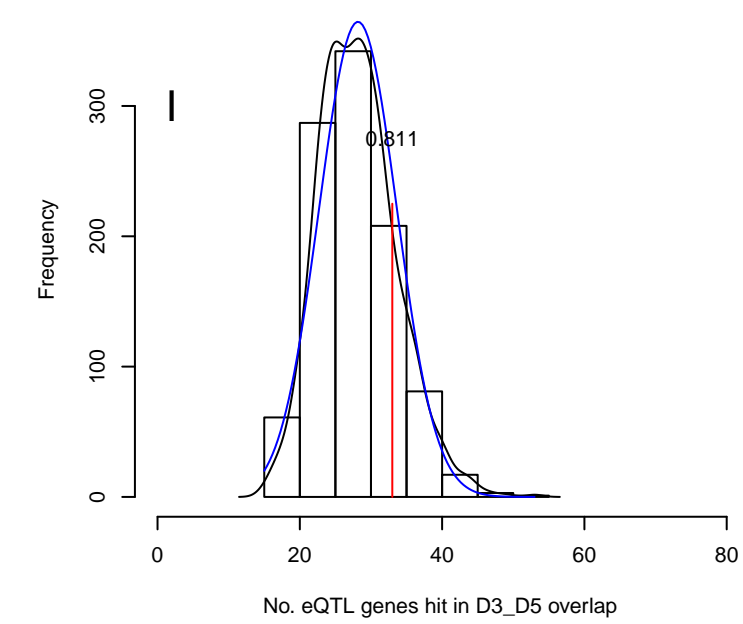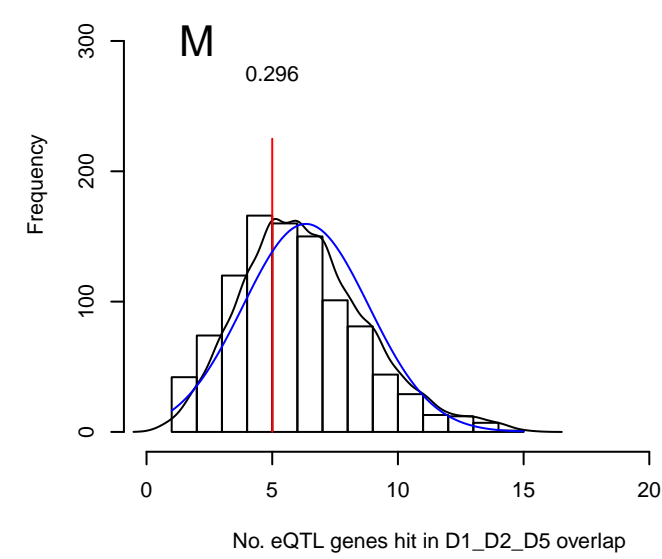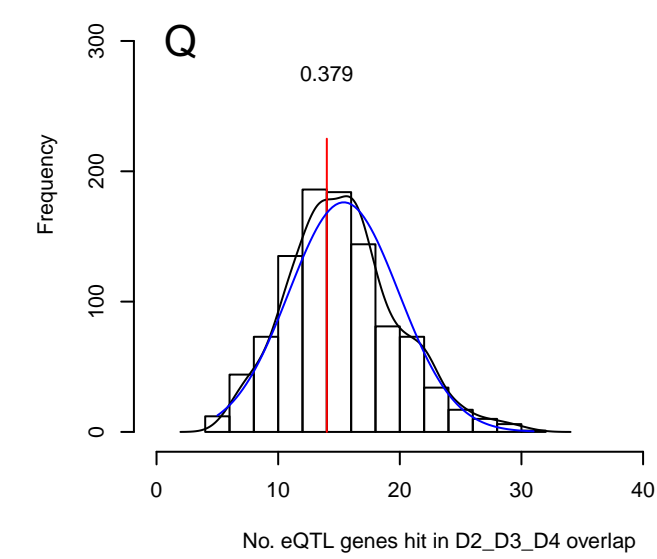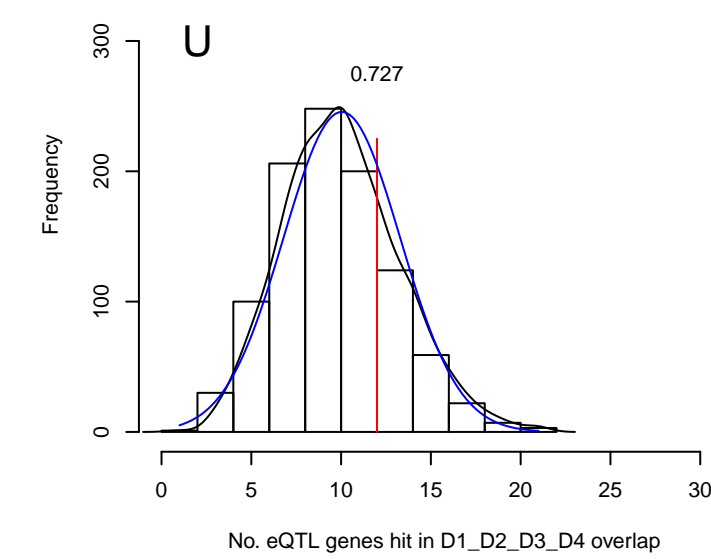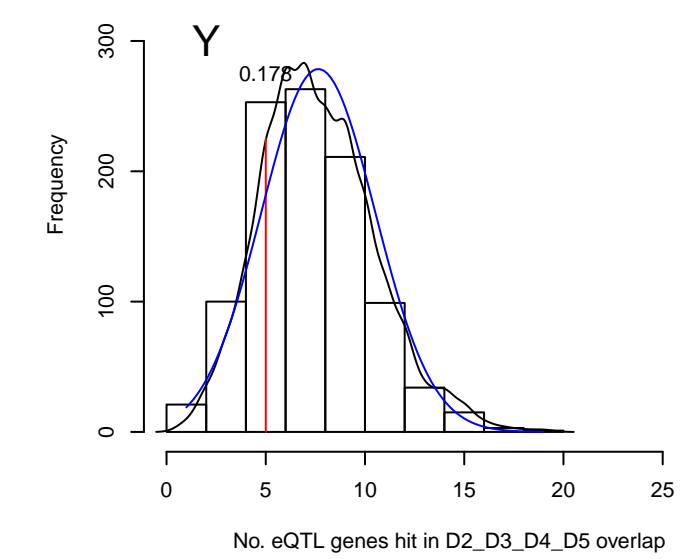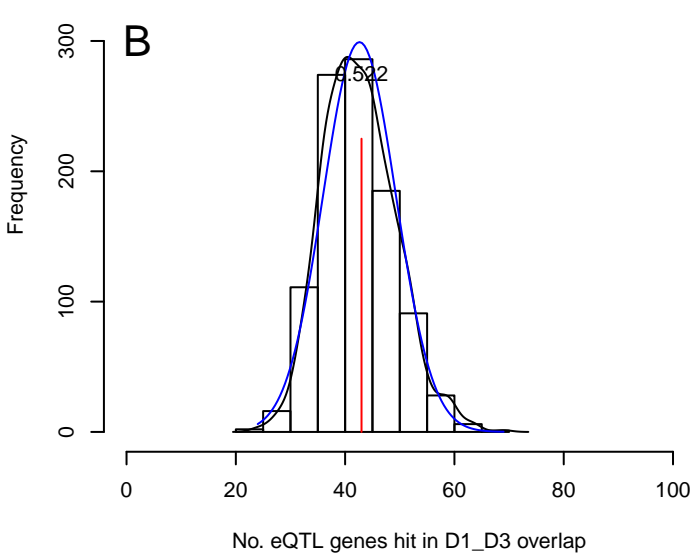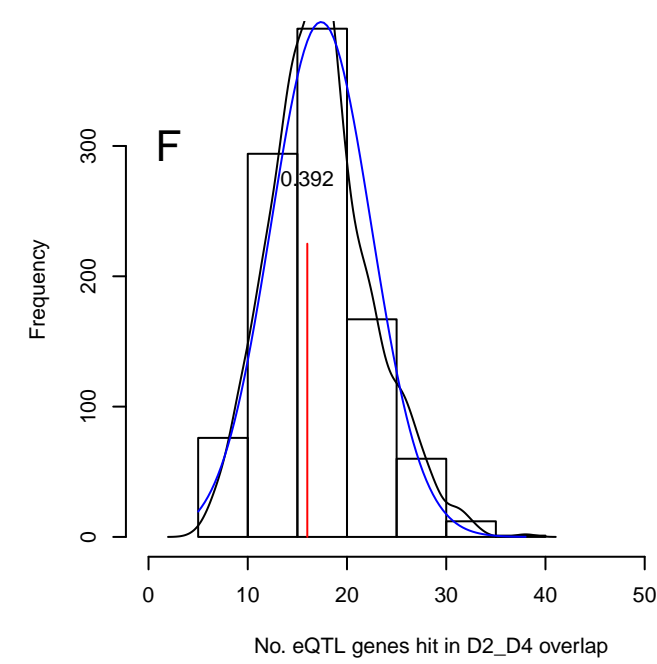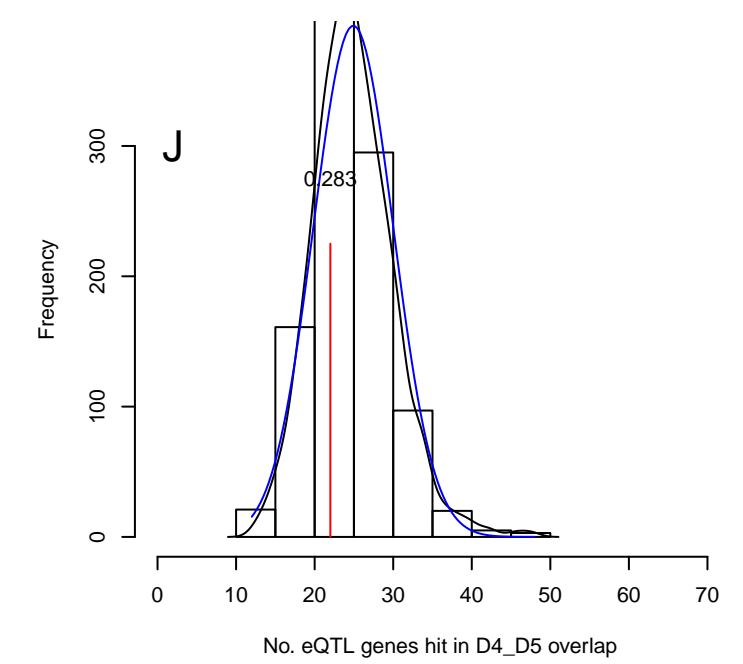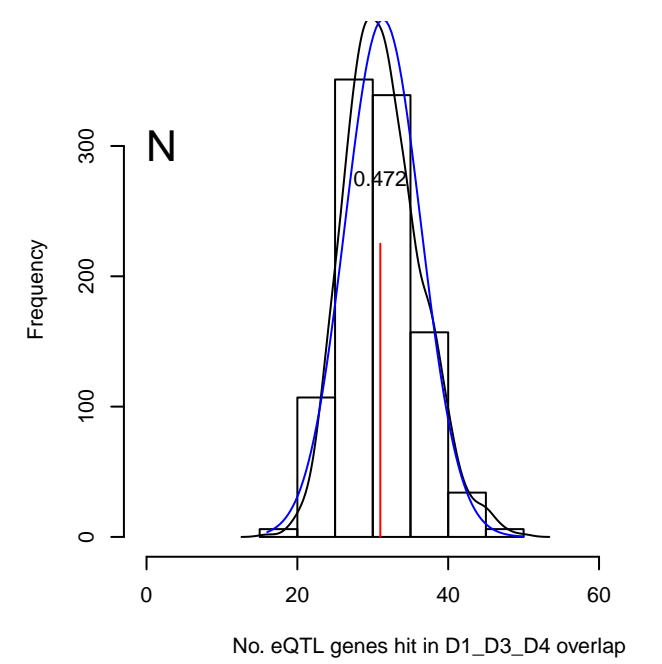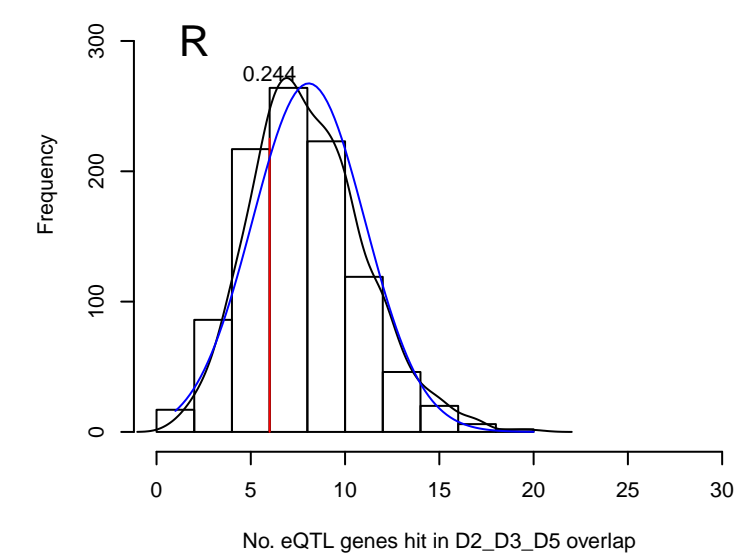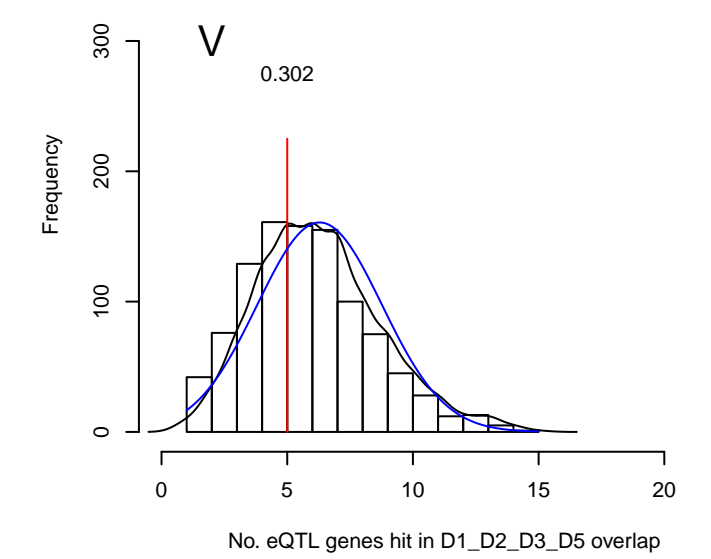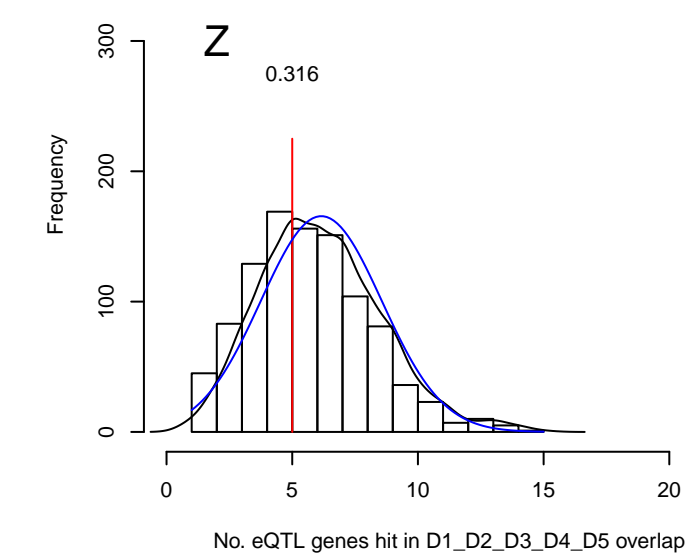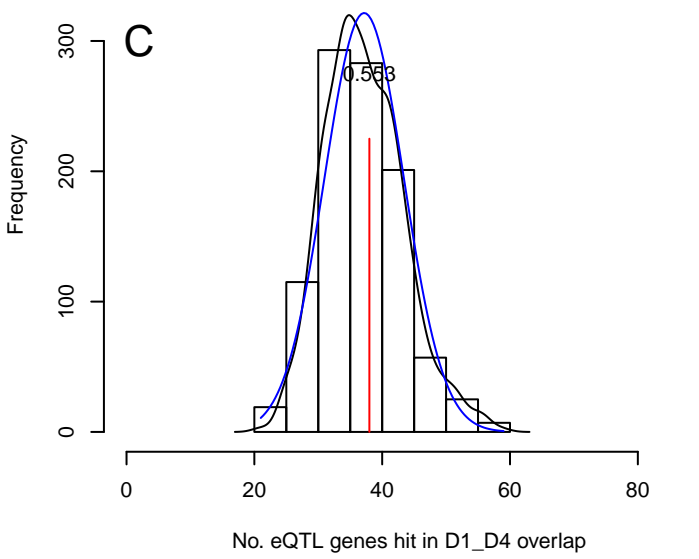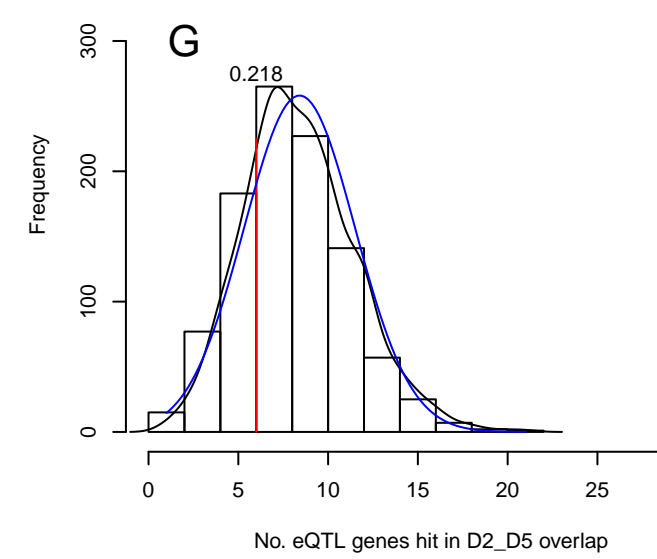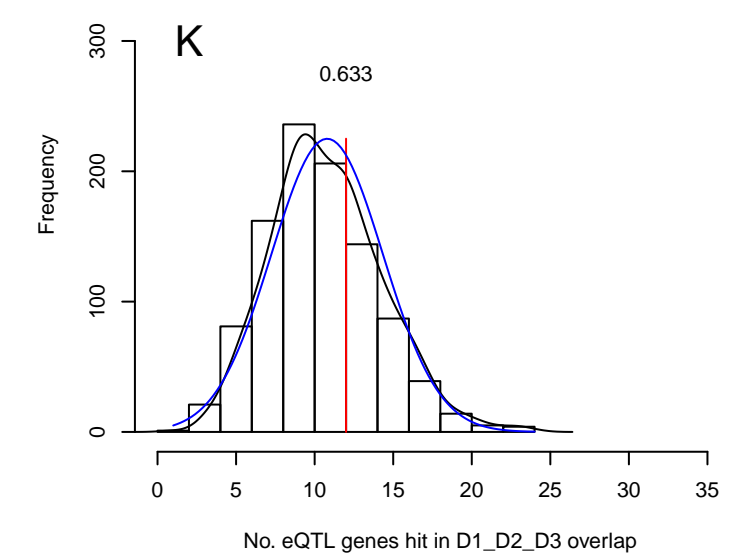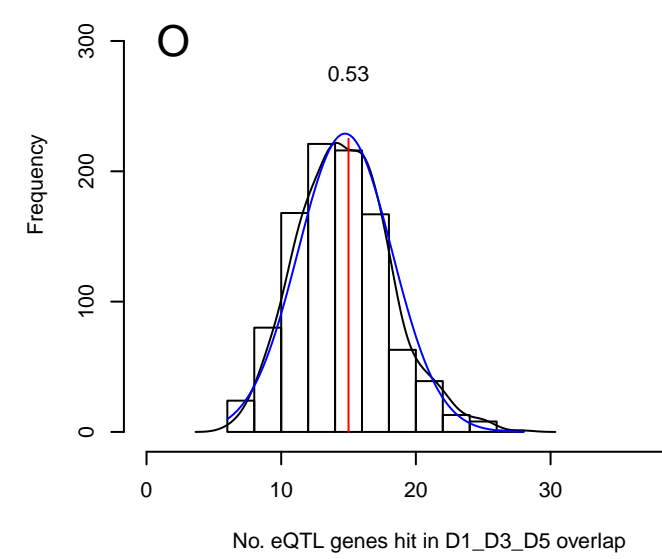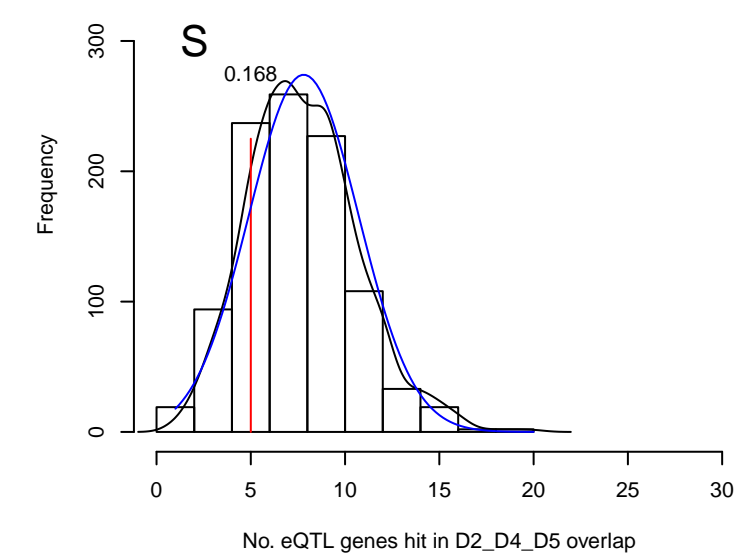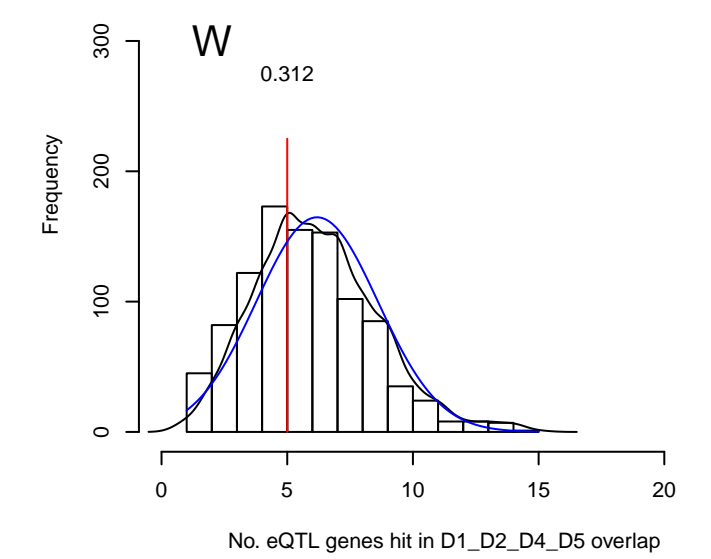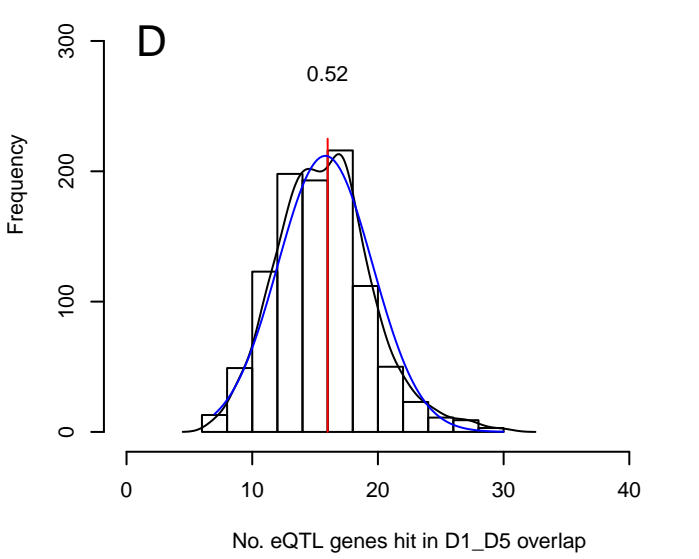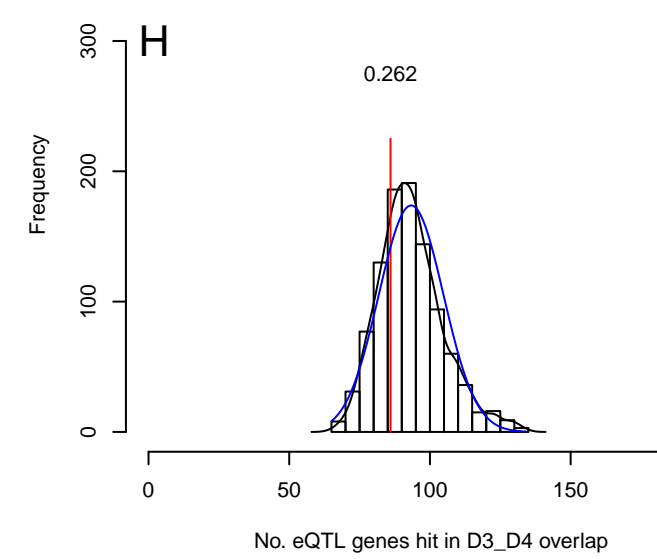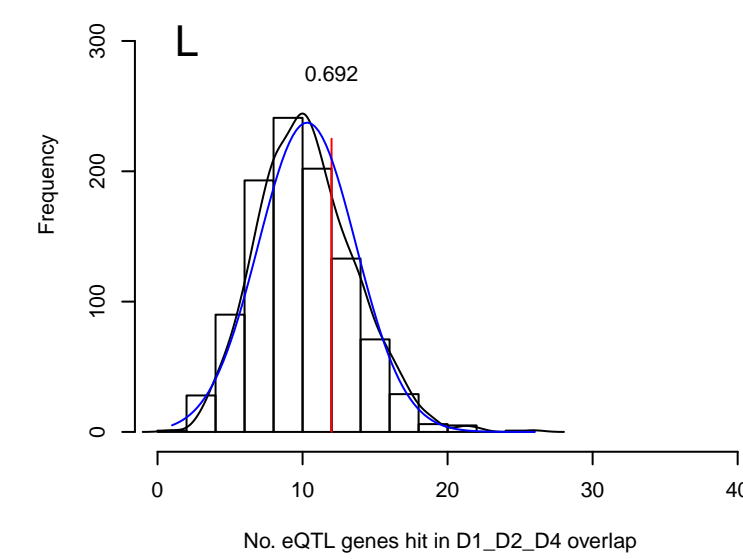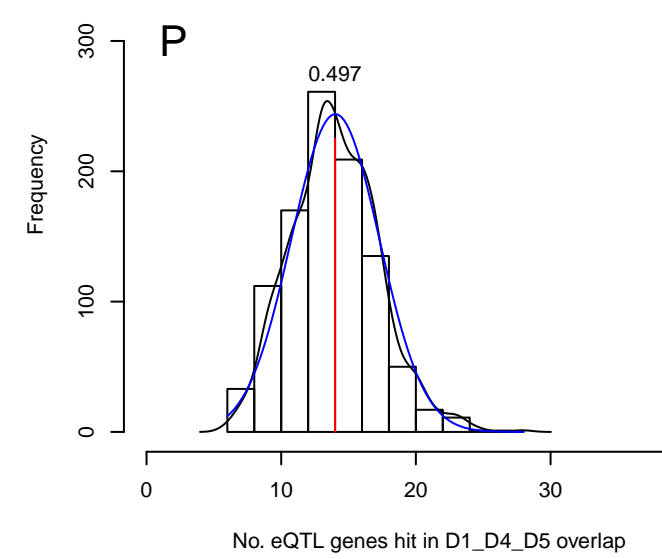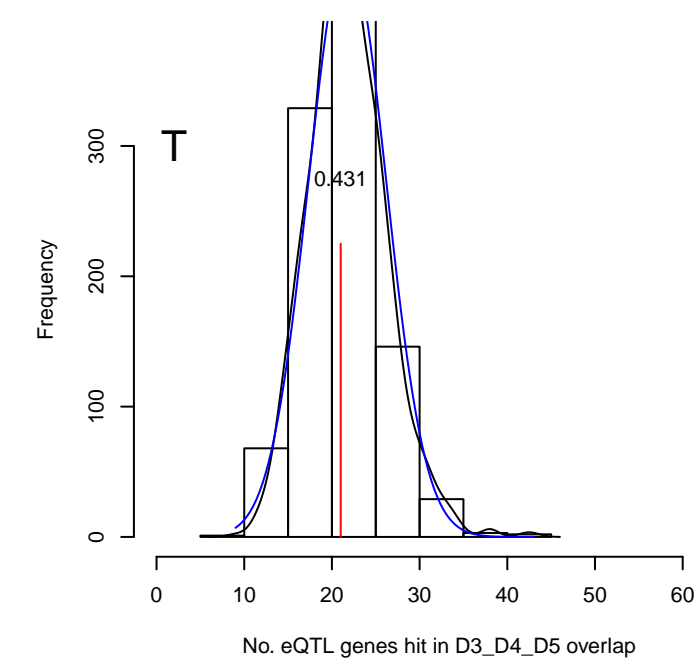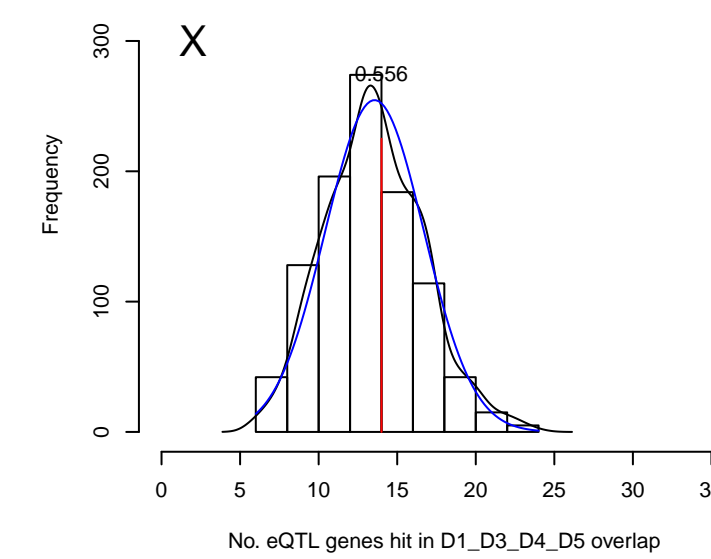

Supplement: figures12.pdf [file figures12.pdf]

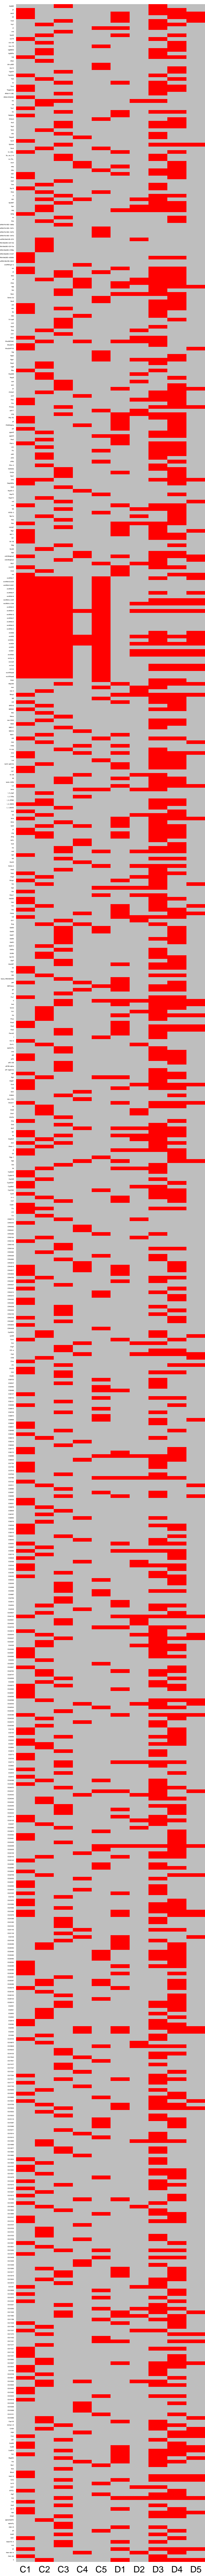

C1 C2 C3 C4 C5 D1 D2 D3 D4 D5

Supplement: figures13.pdf [file figures13.pdf]

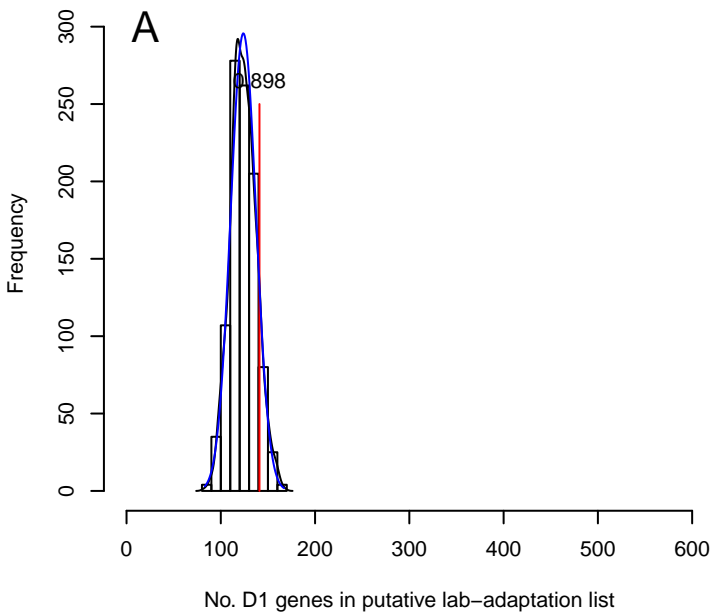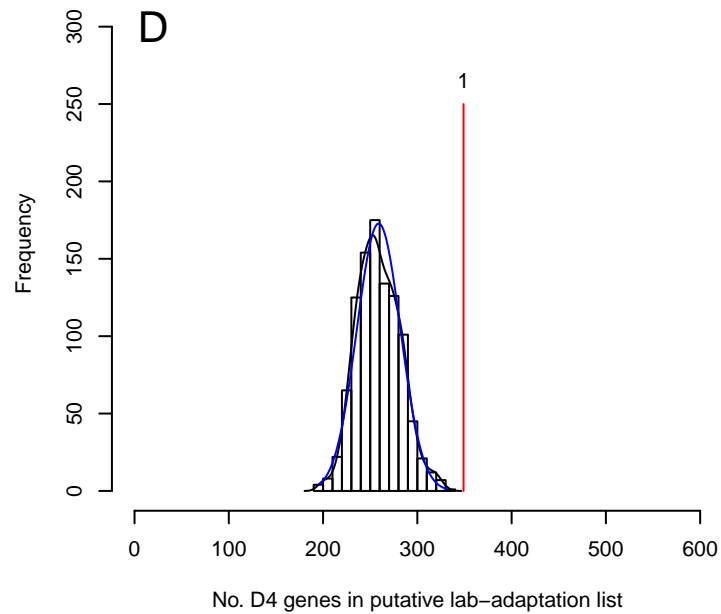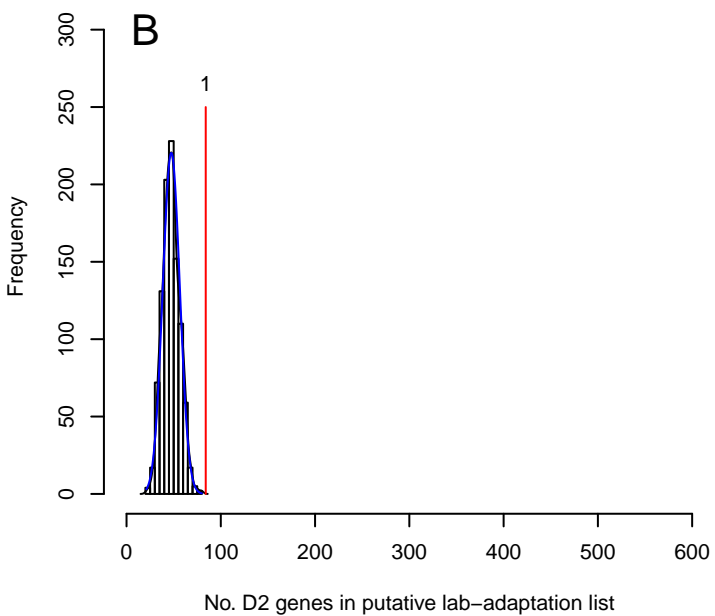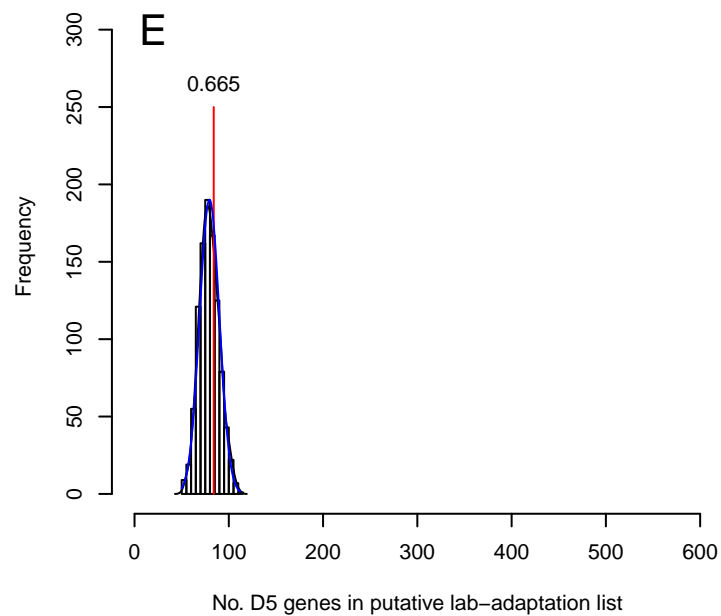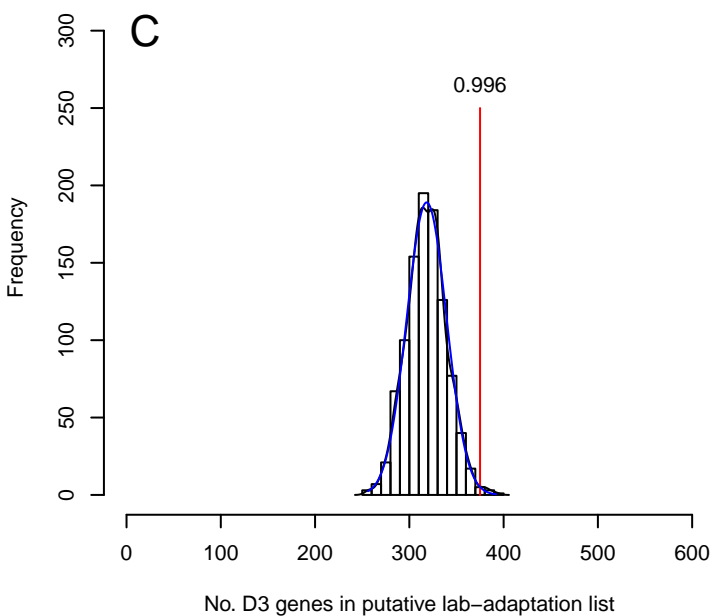

Supplement: figures14.pdf [file figures14.pdf]

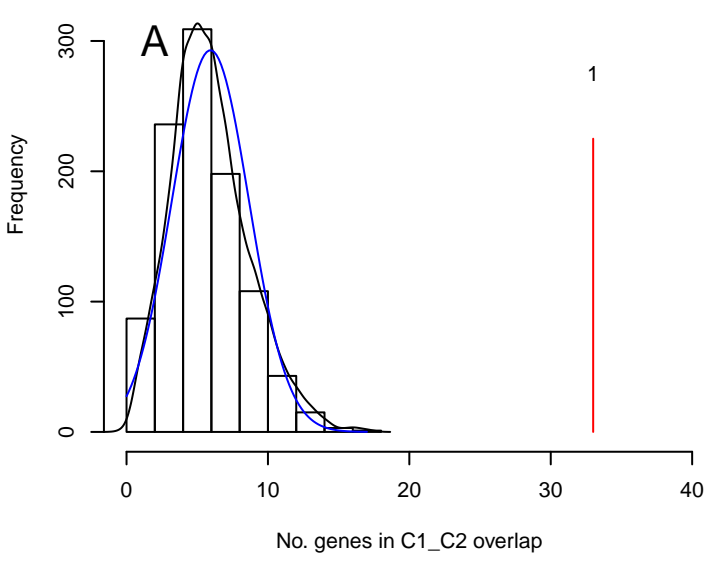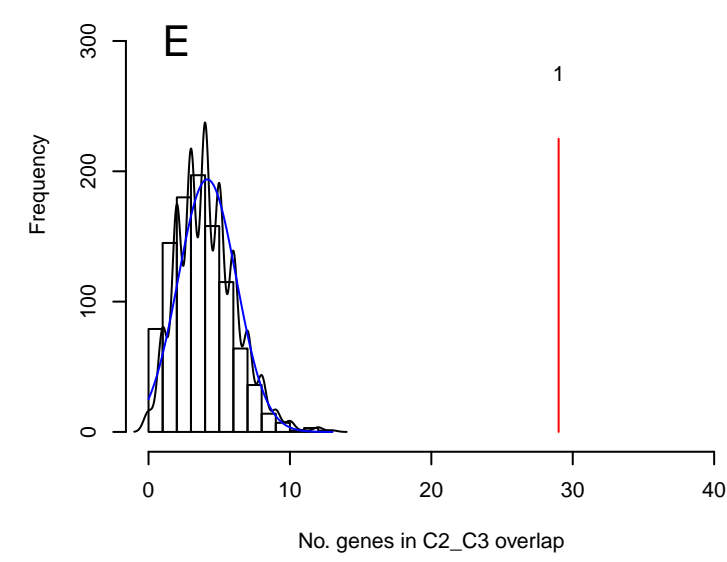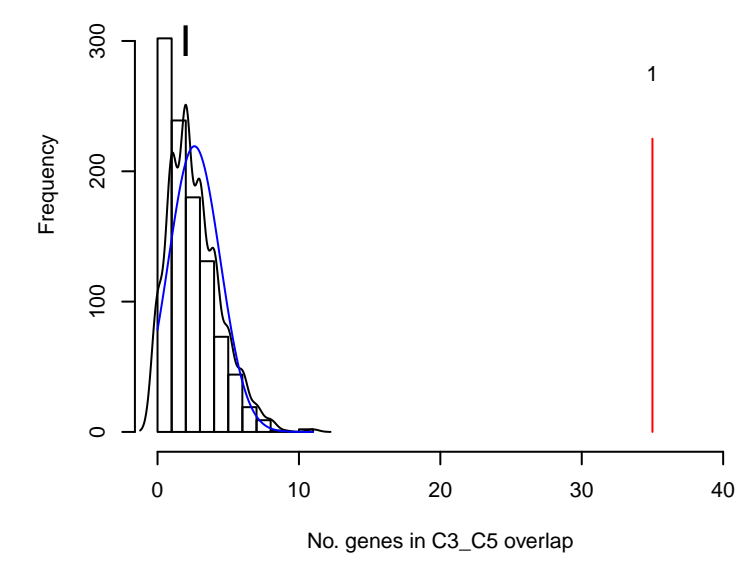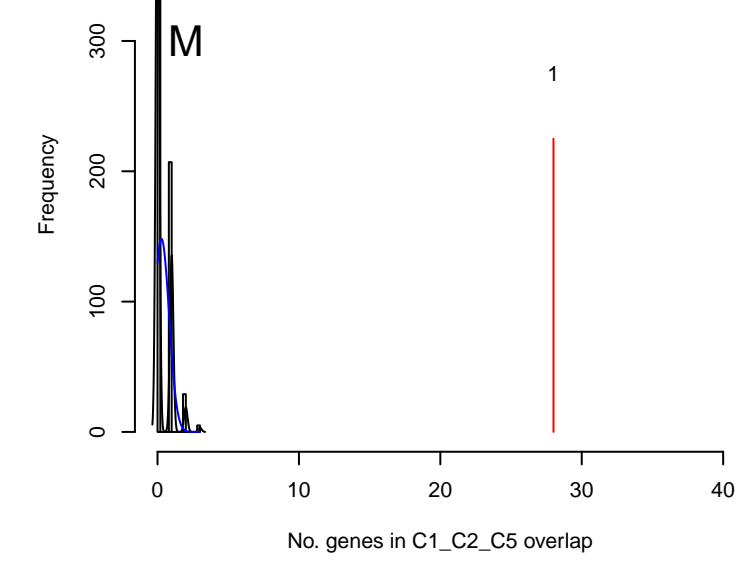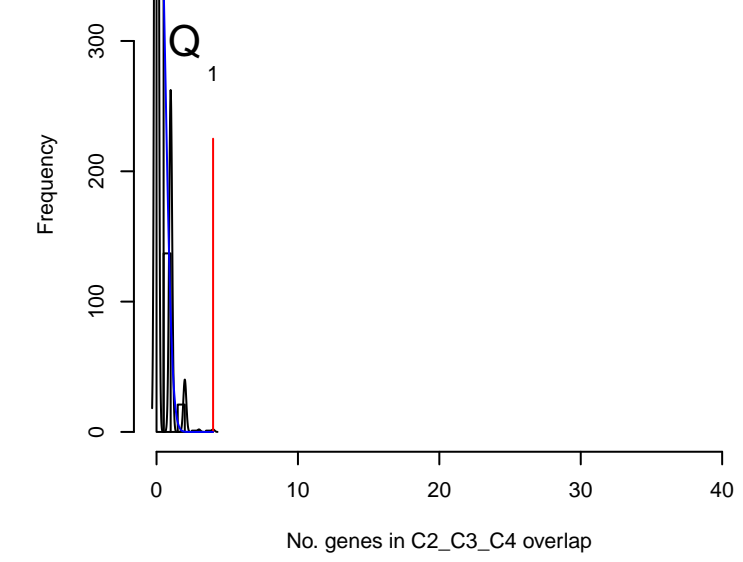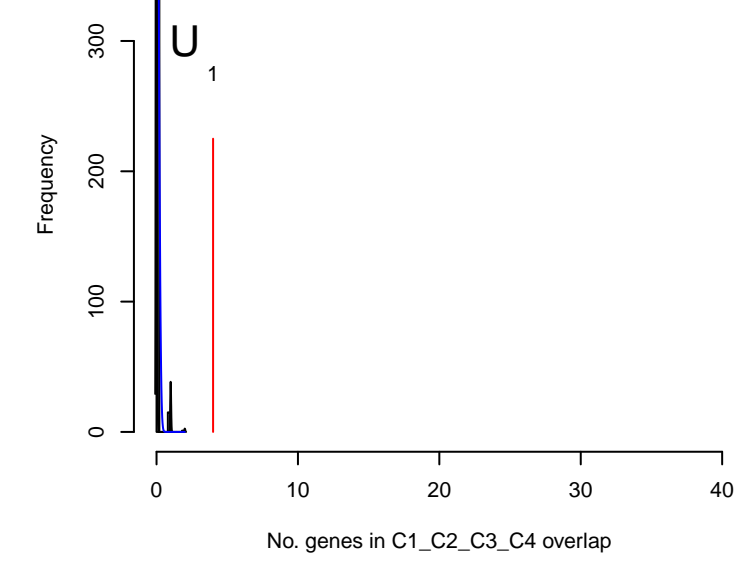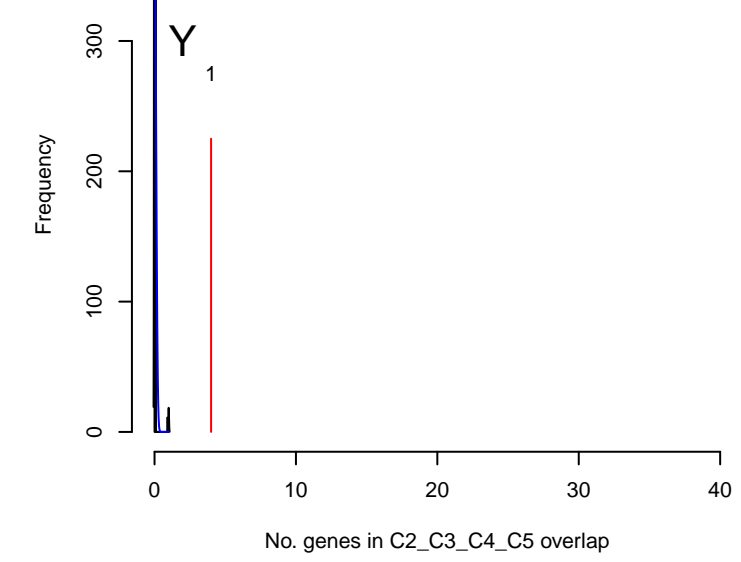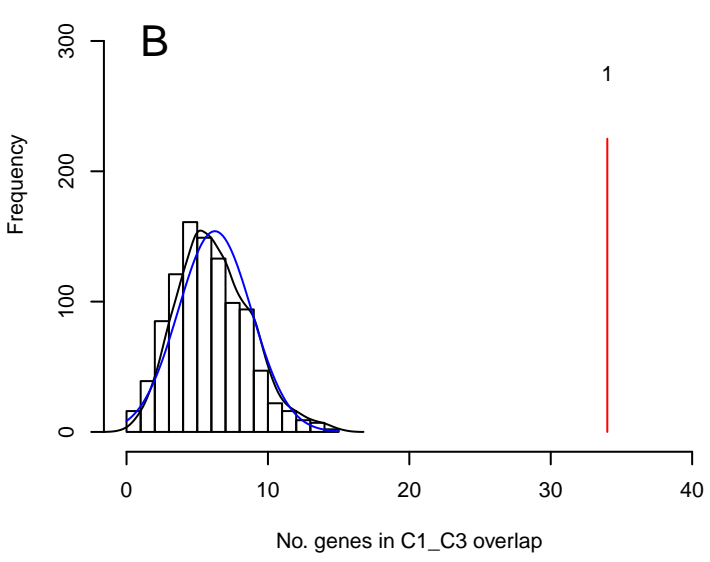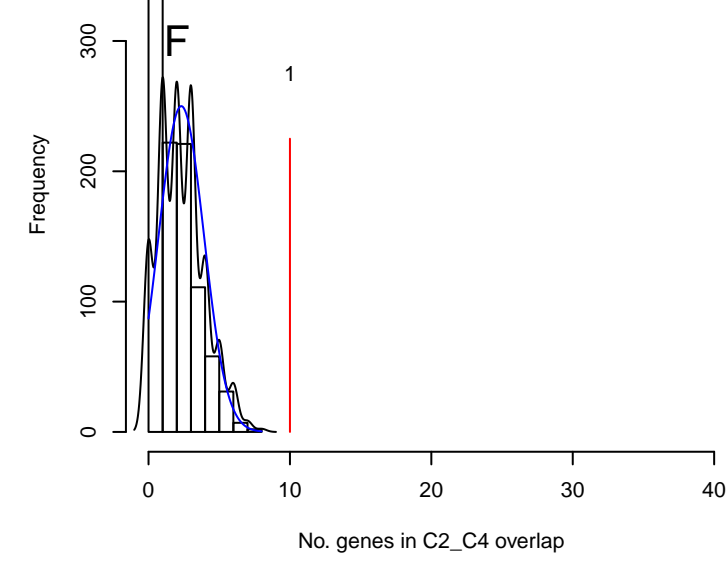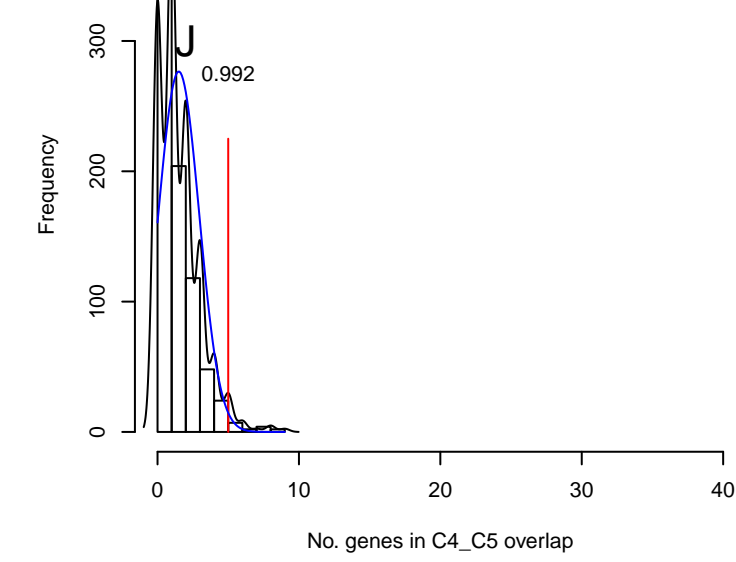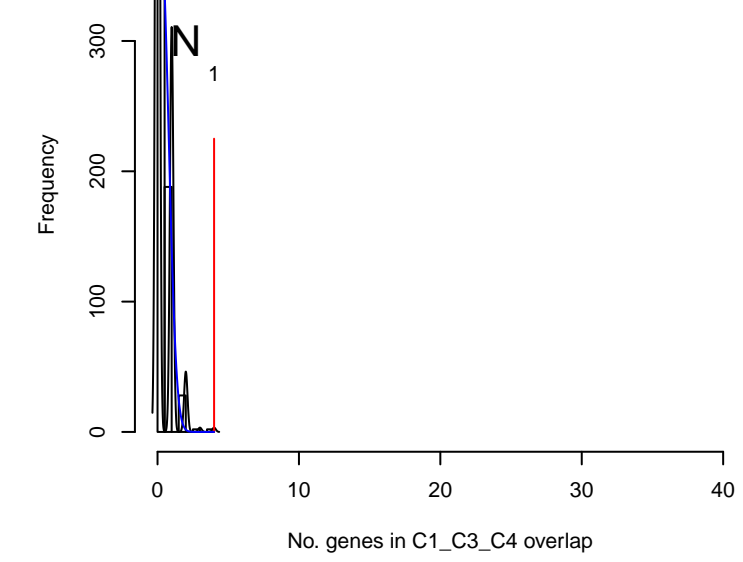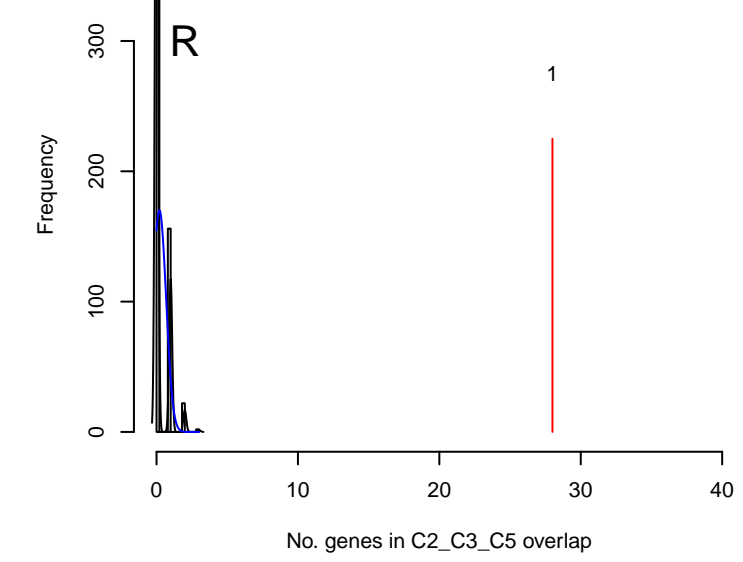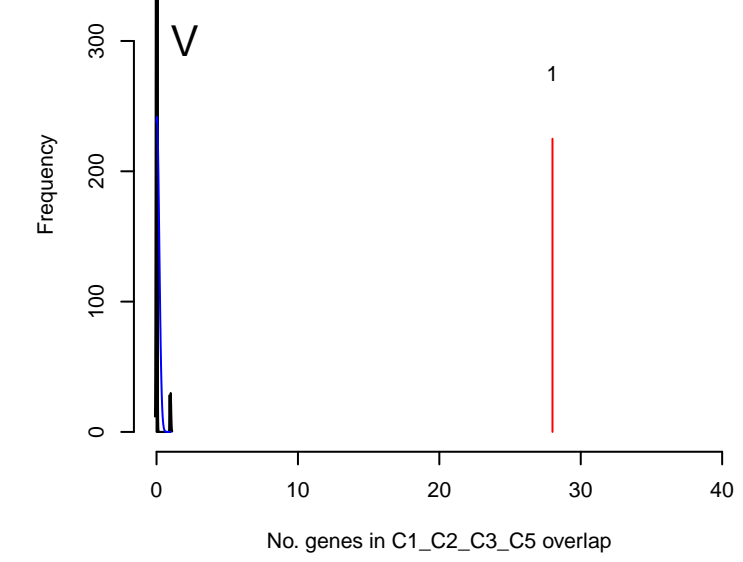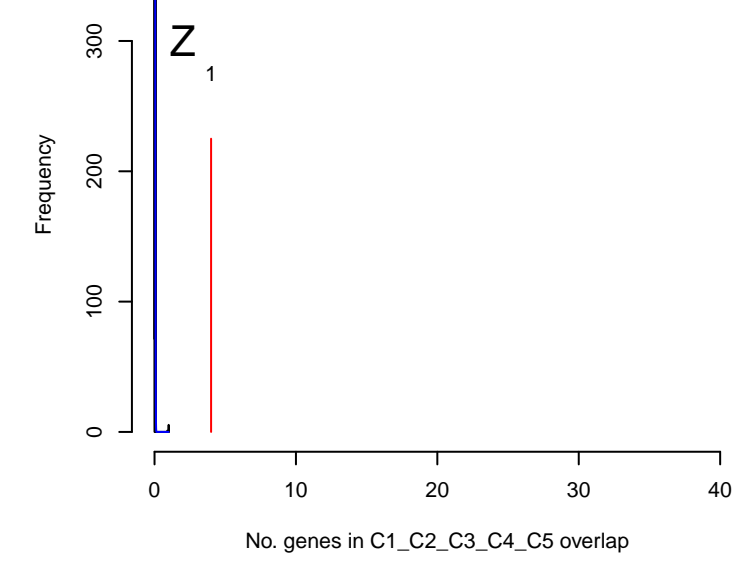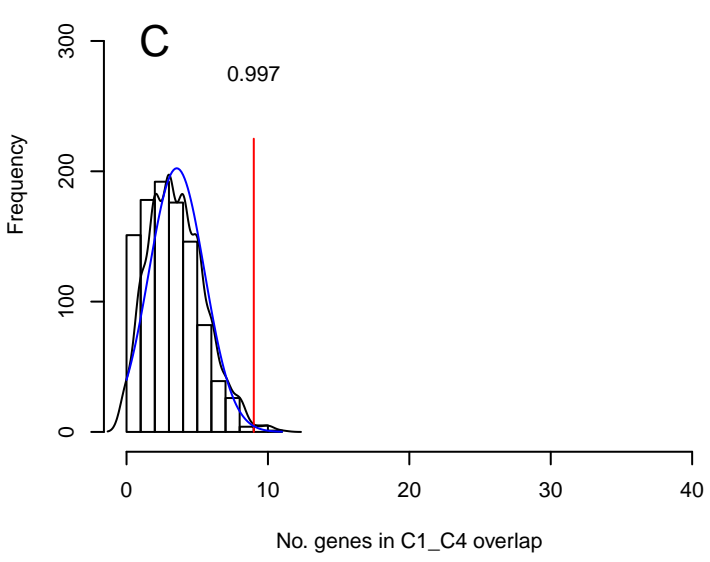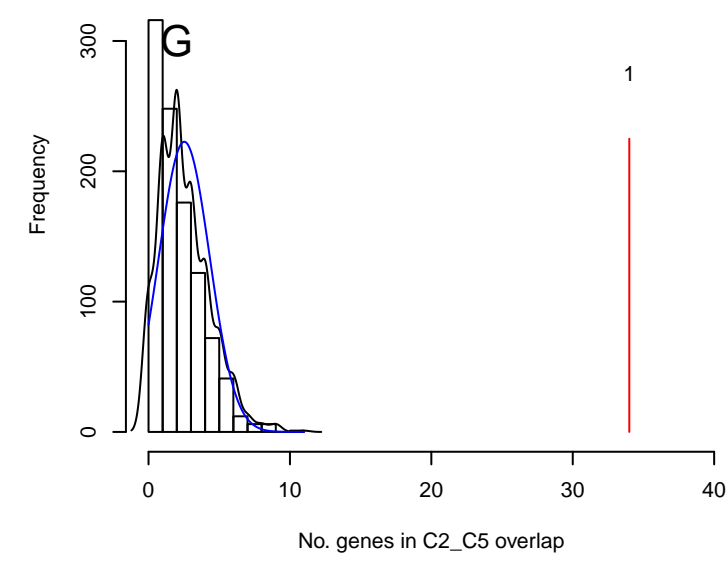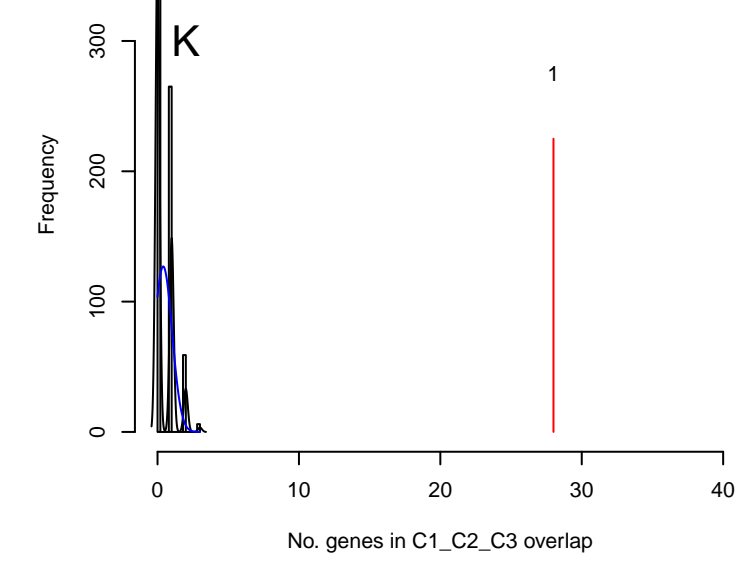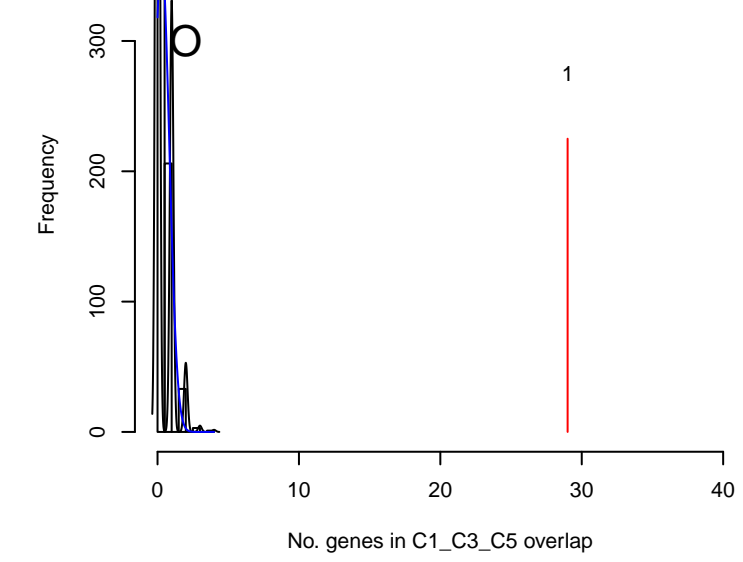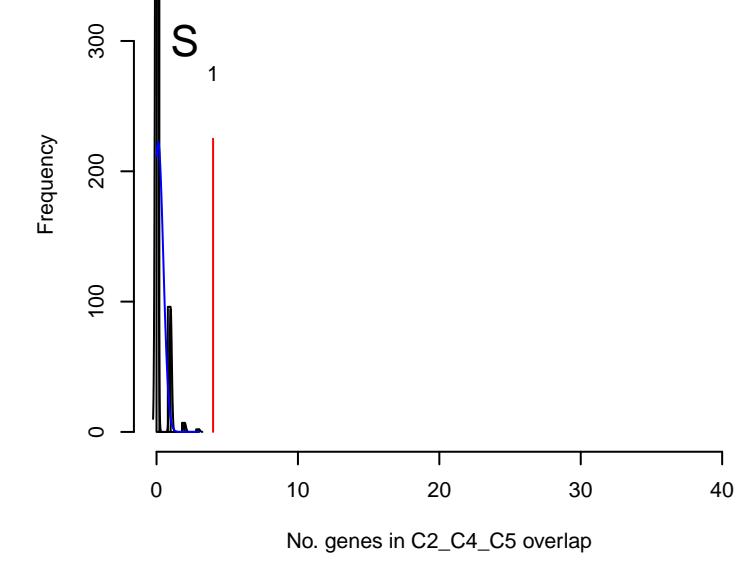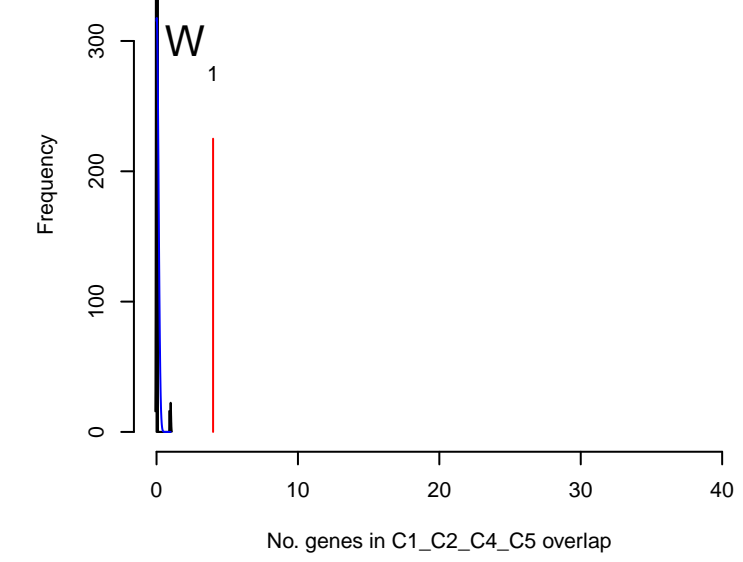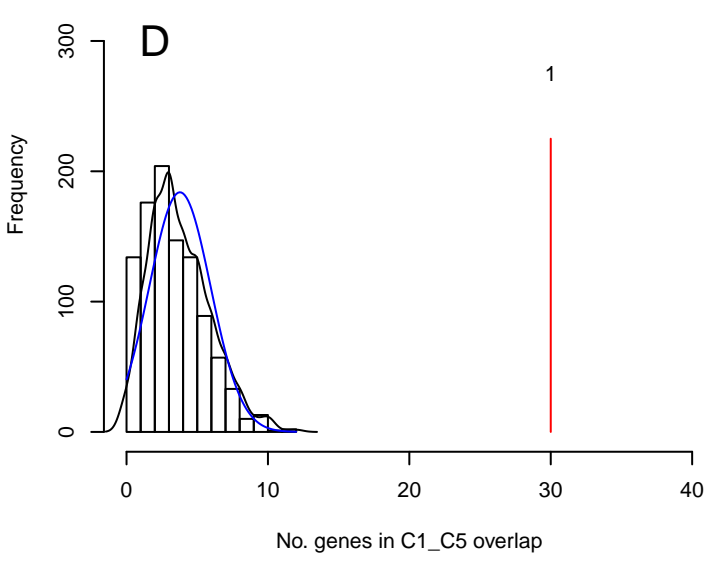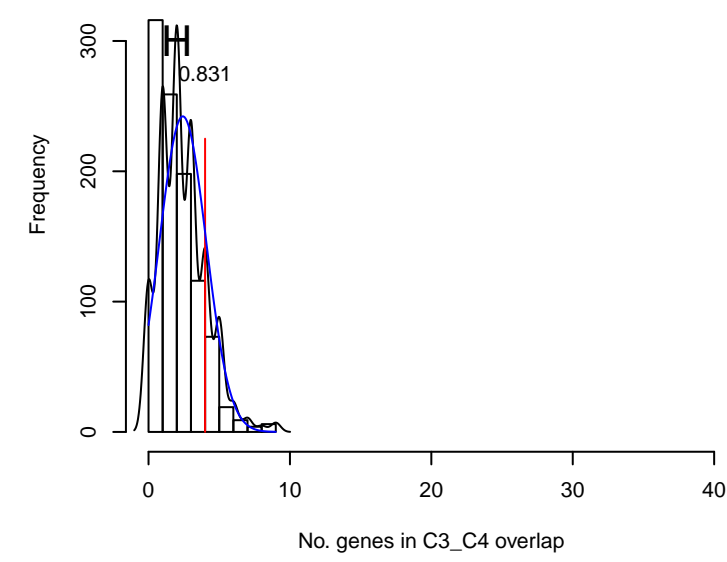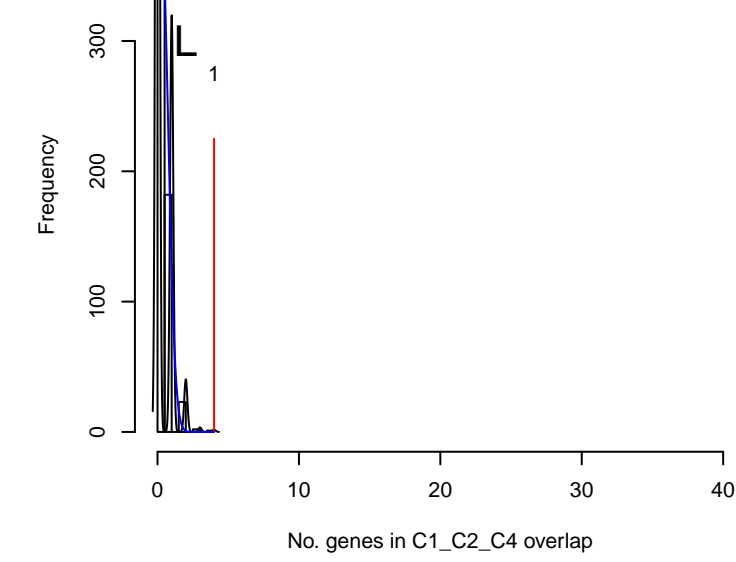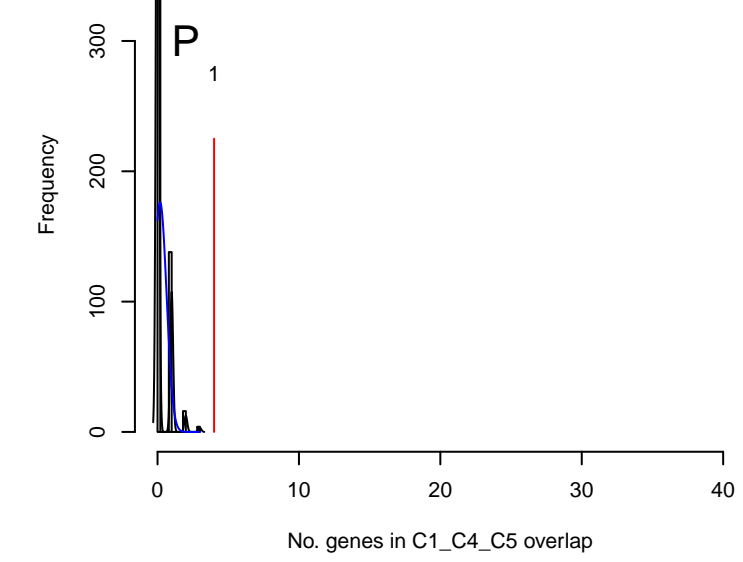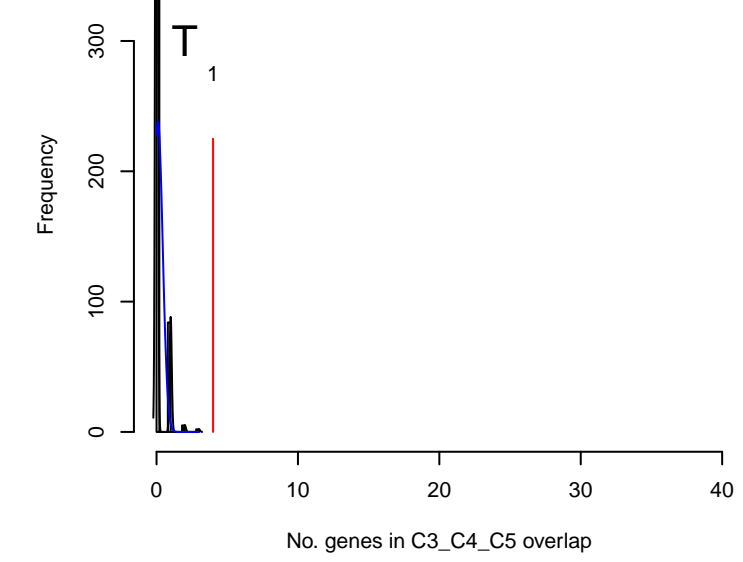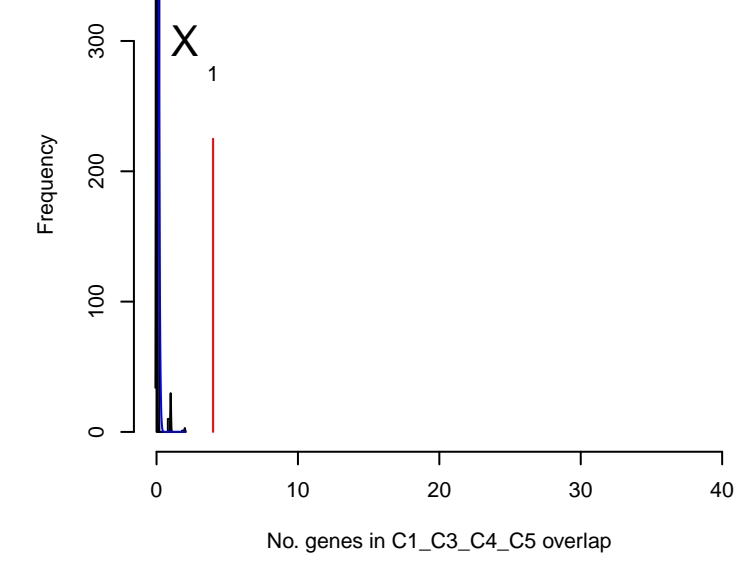

Supplement: figures15.pdf [file figures15.pdf]

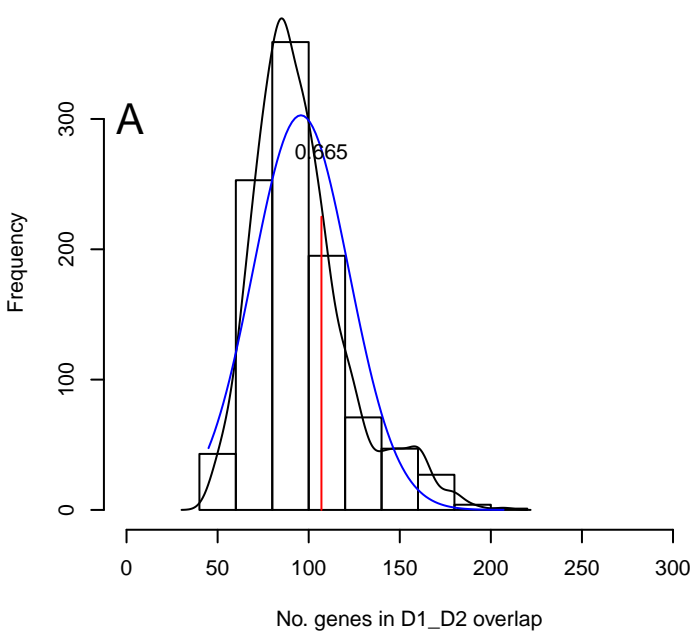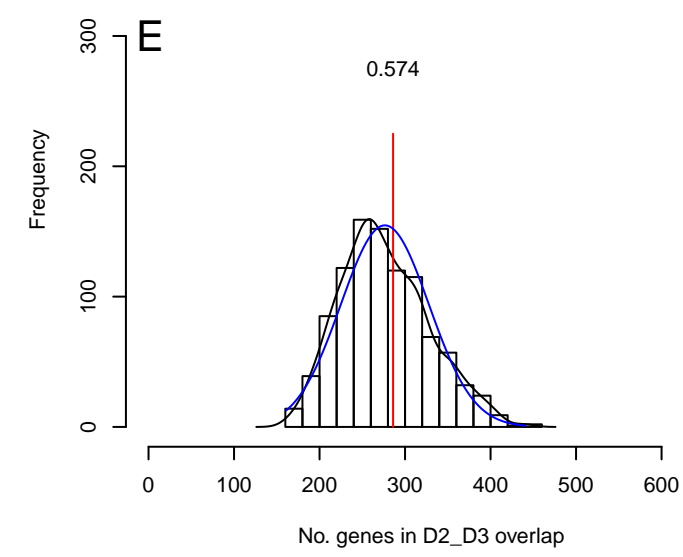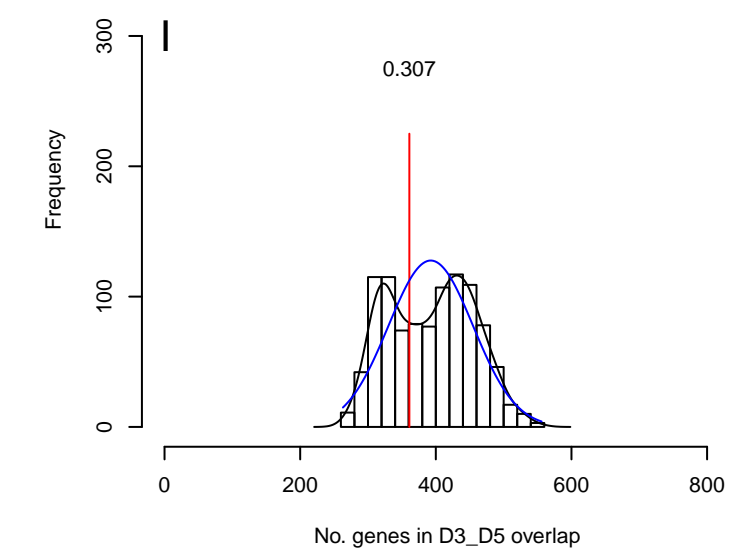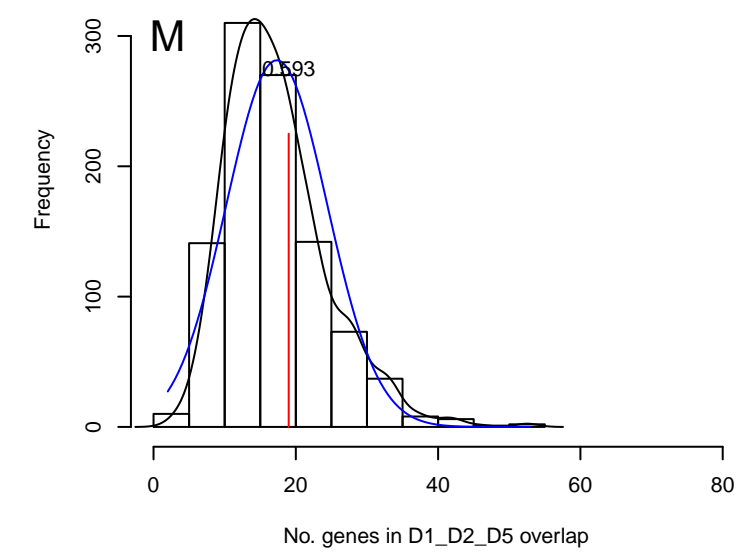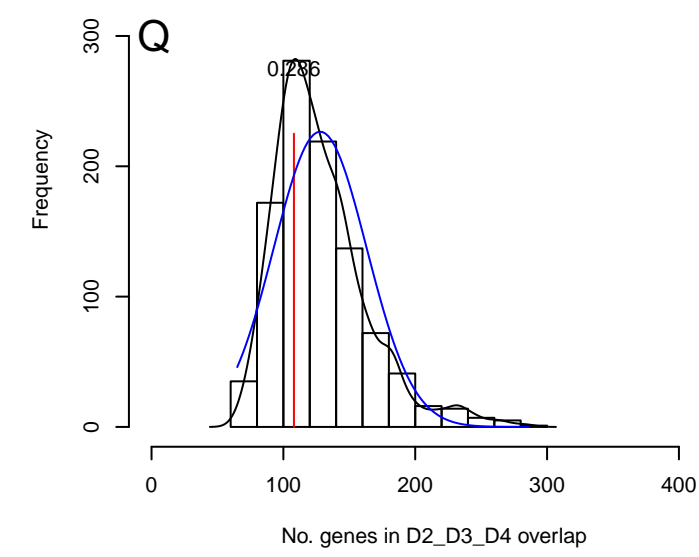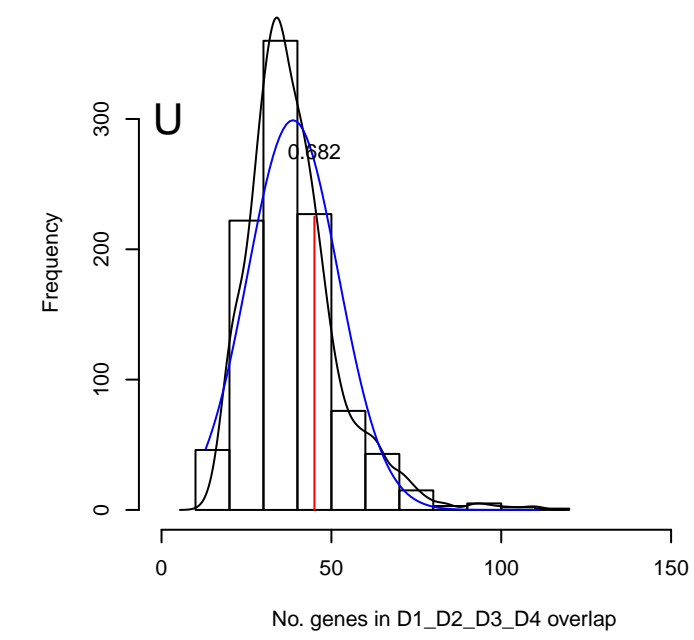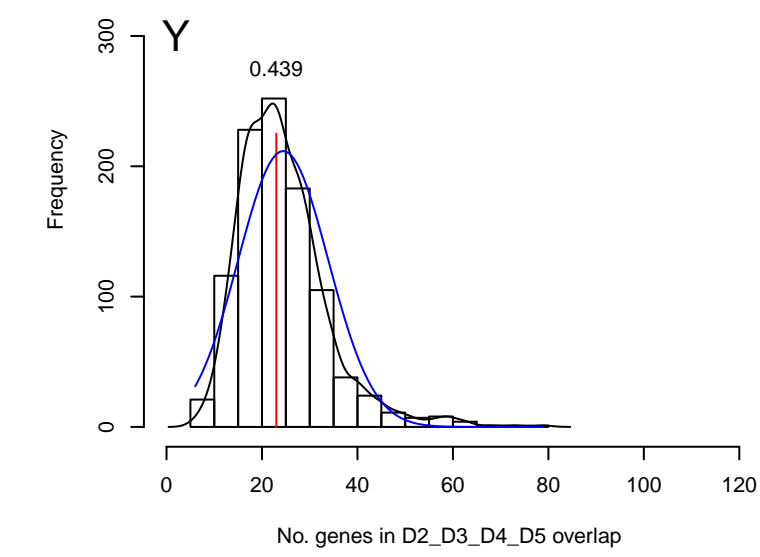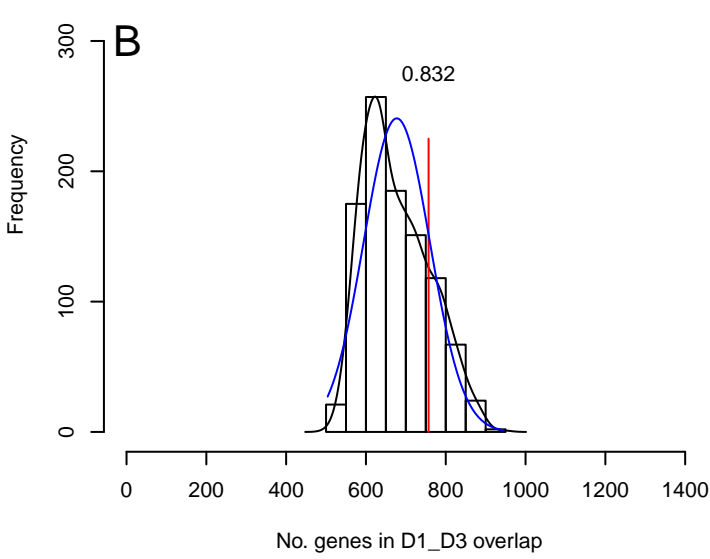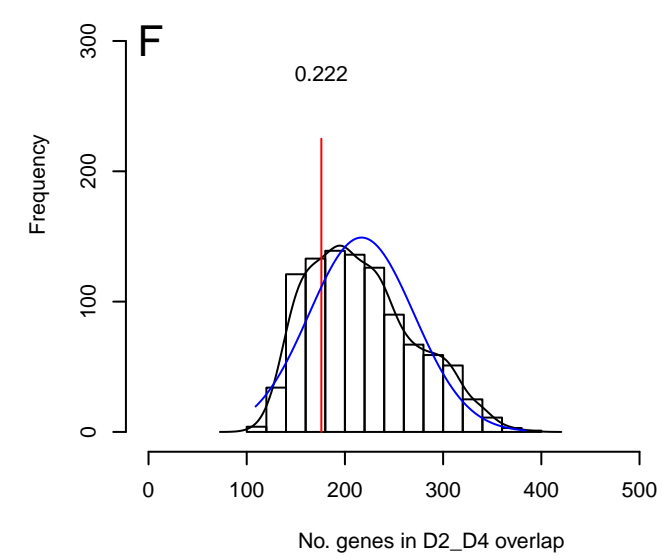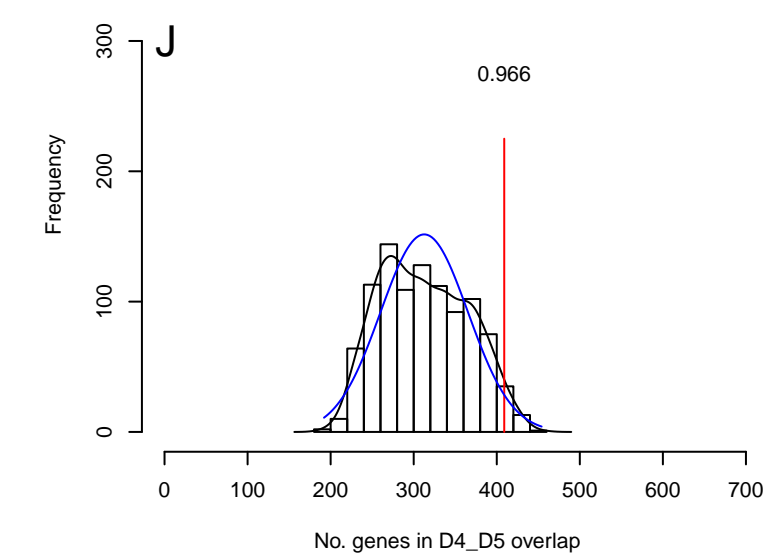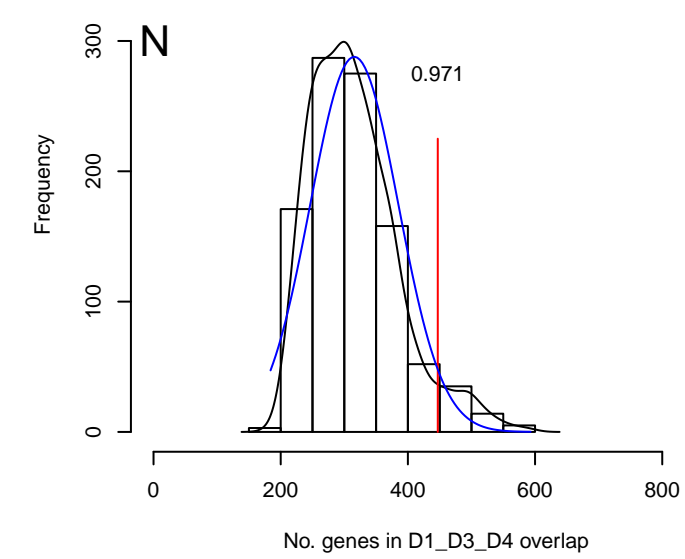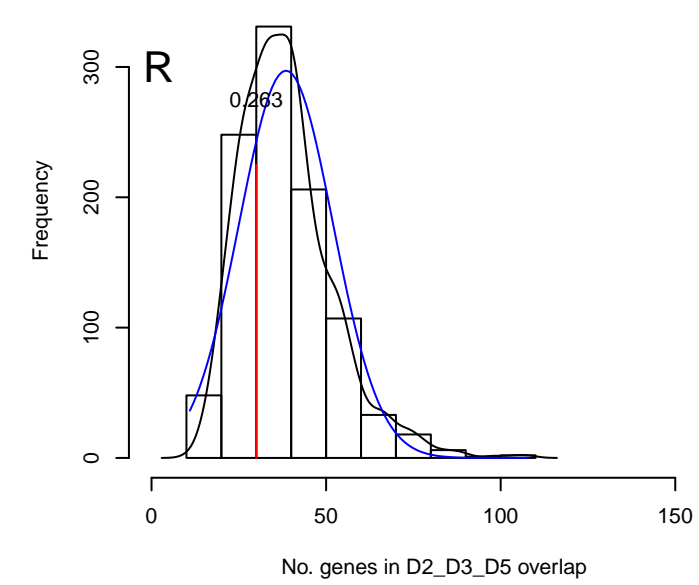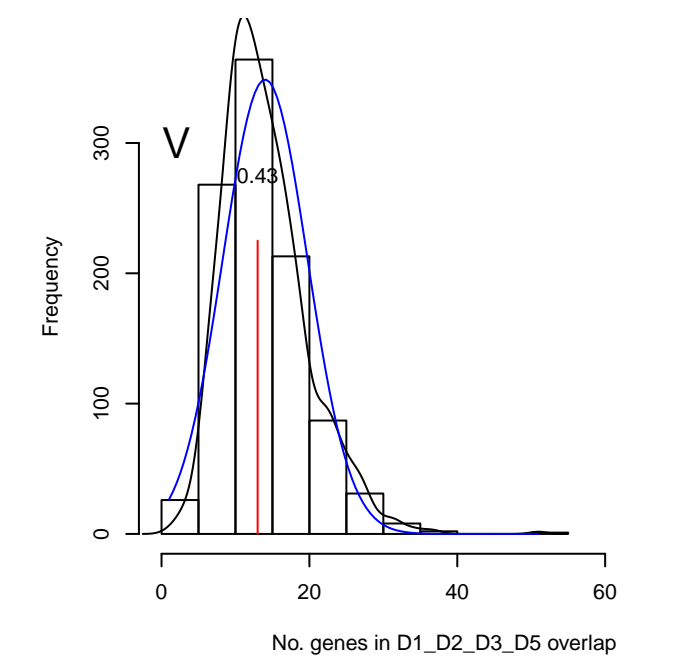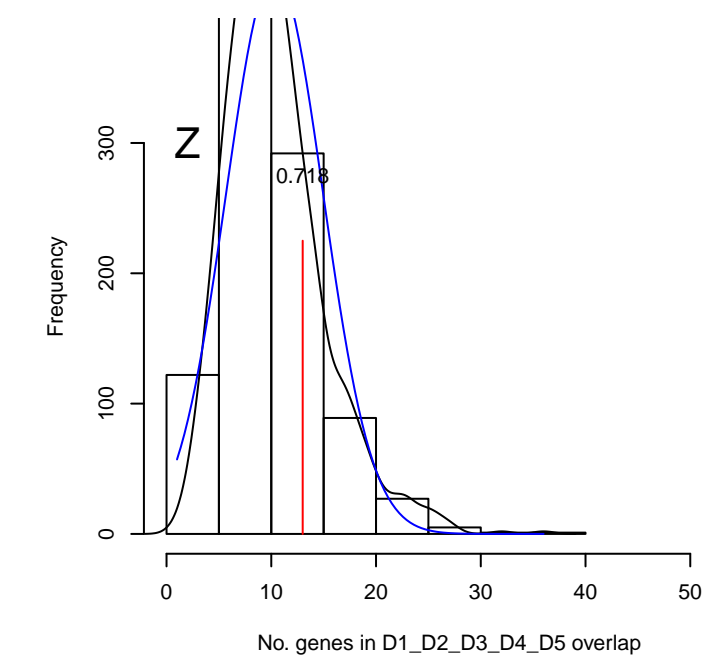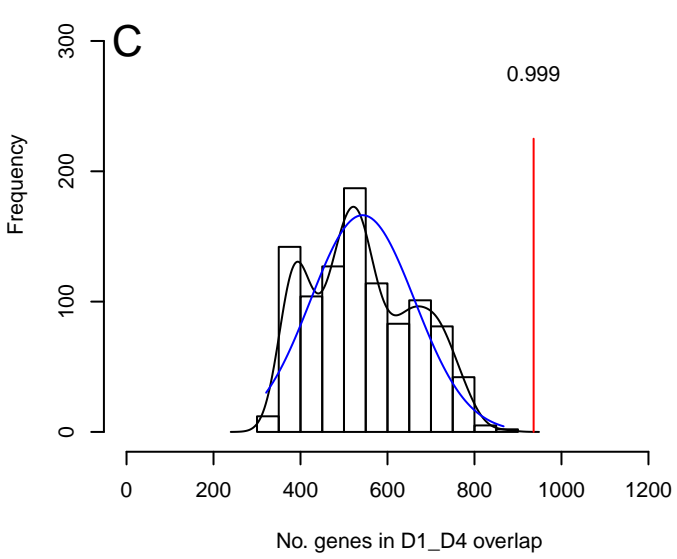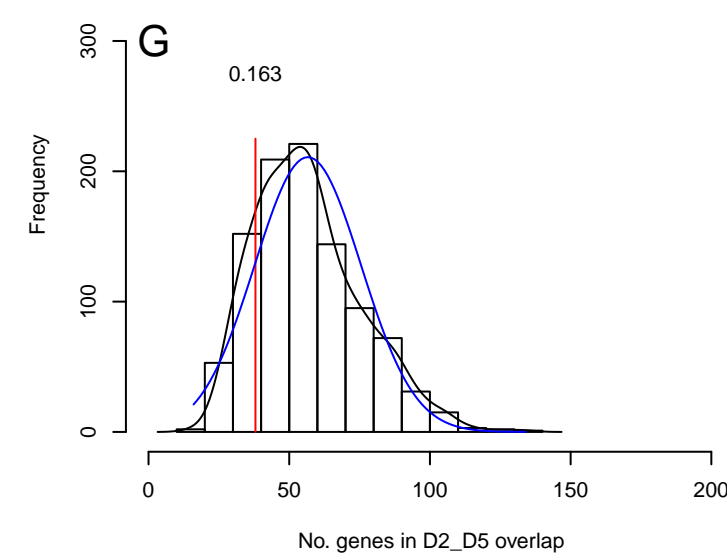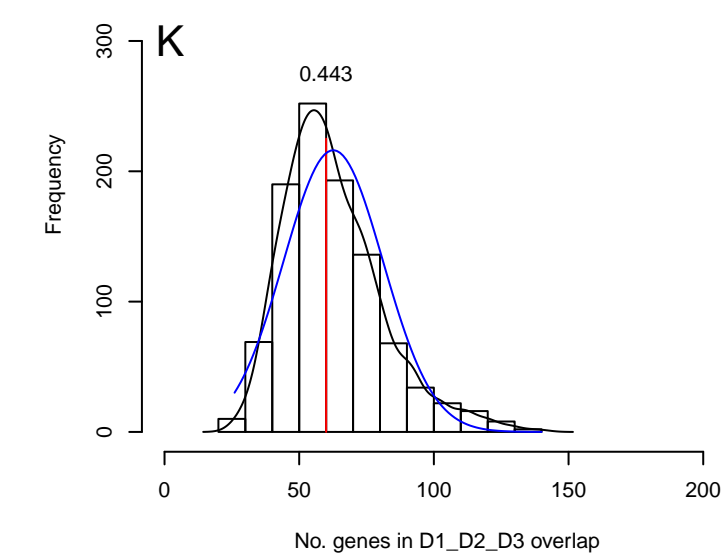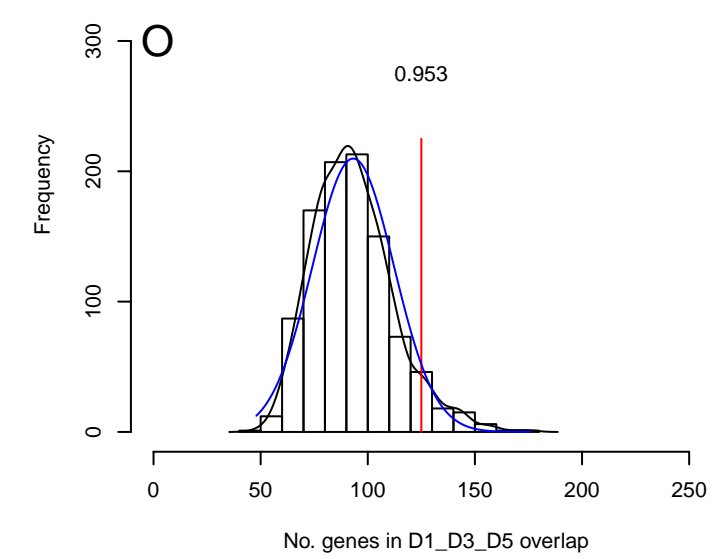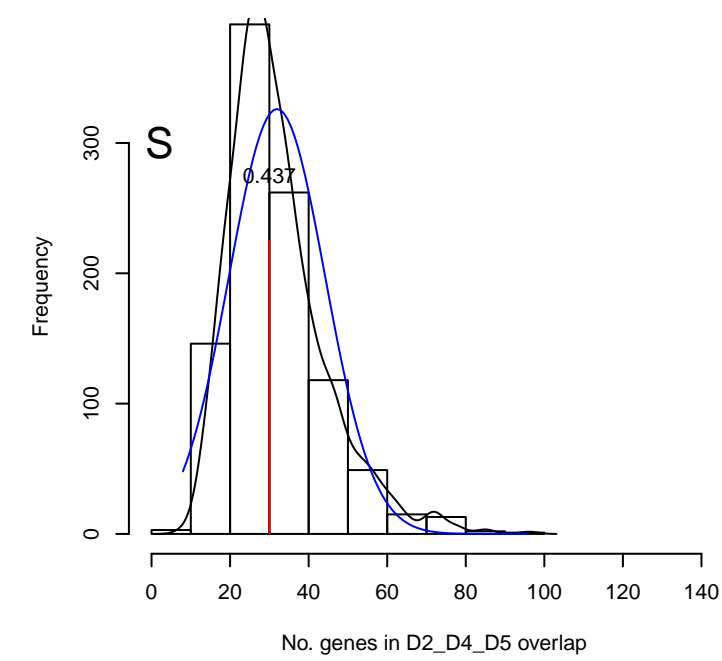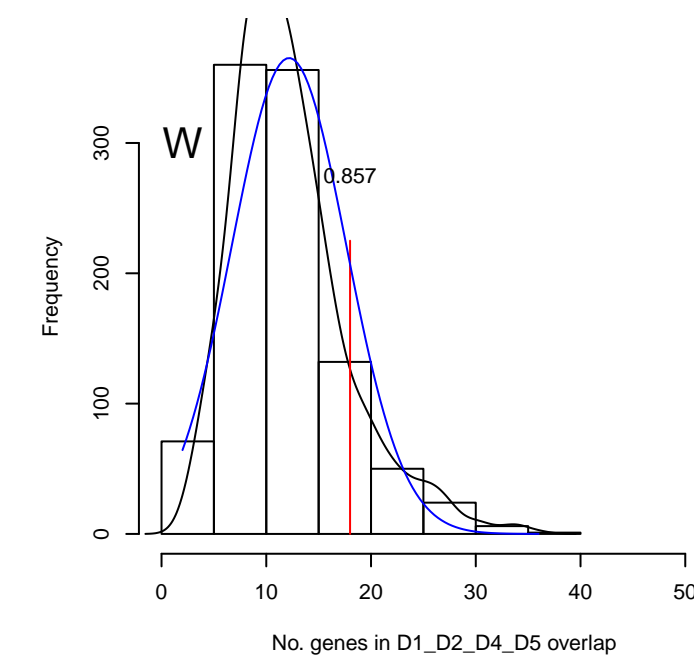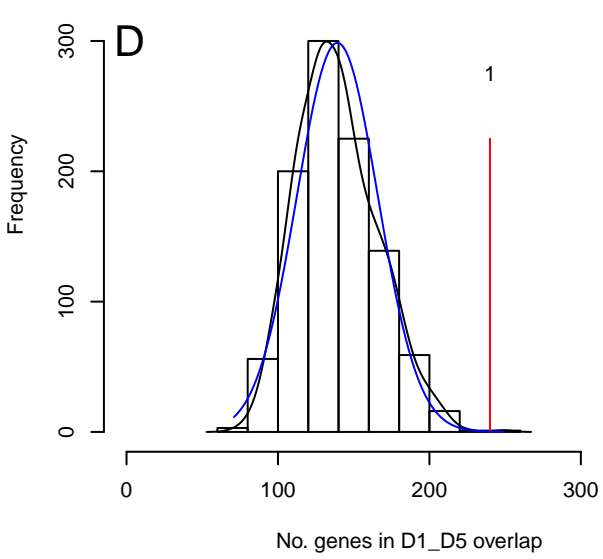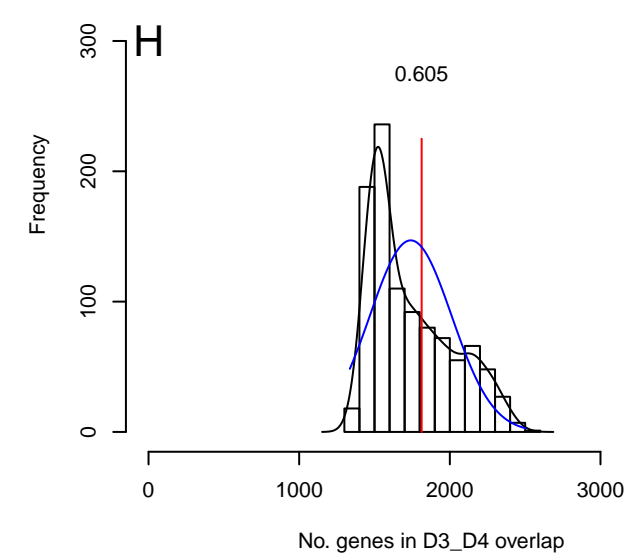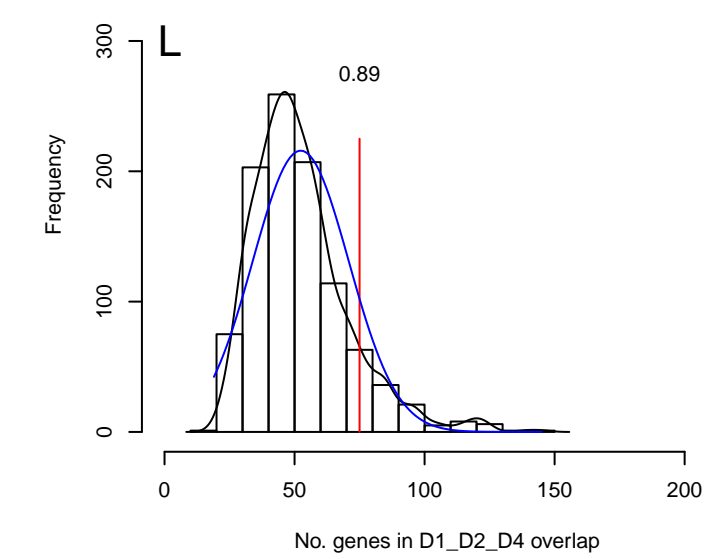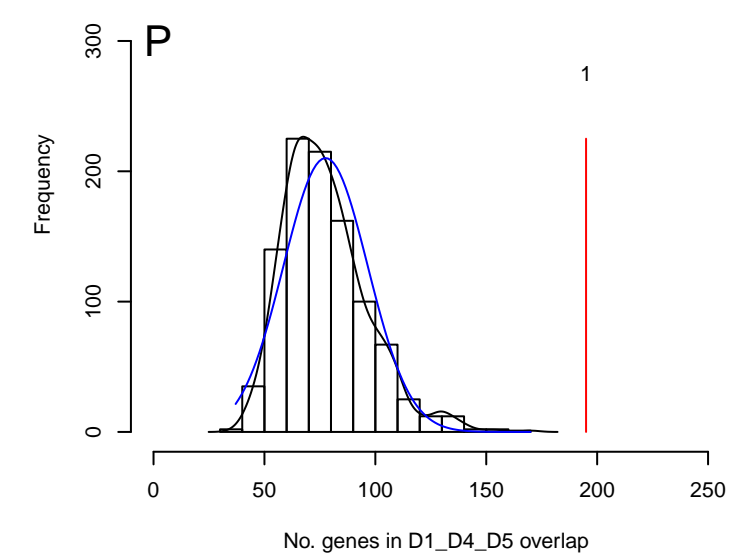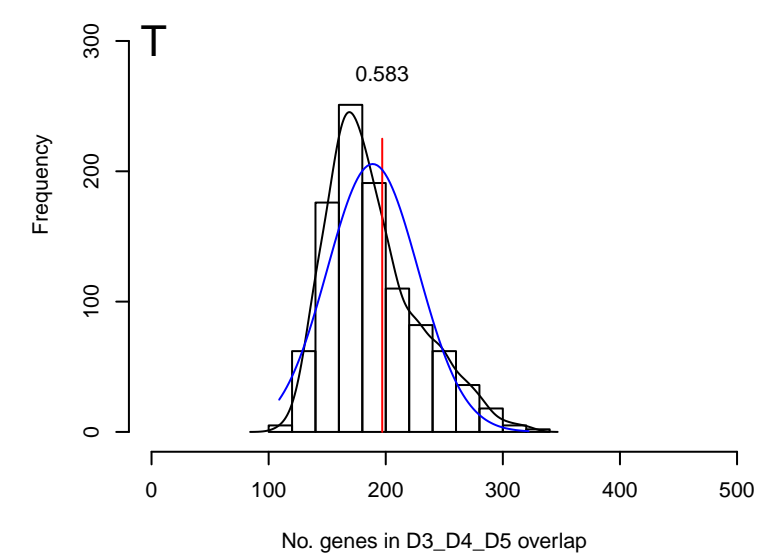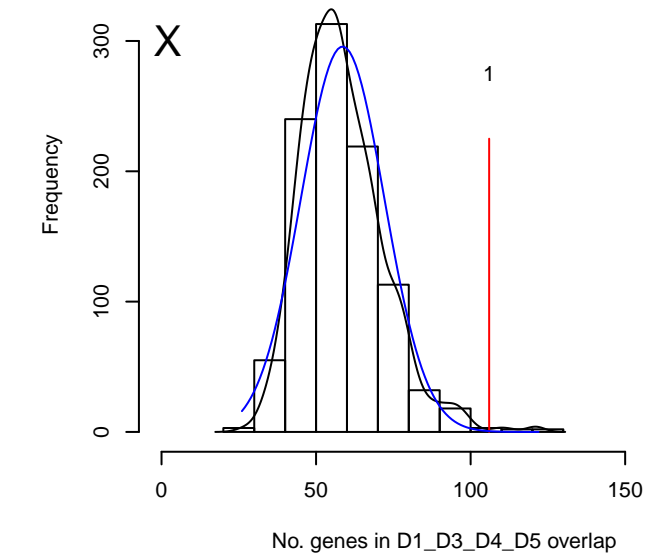

Supplement: figures16.pdf [file figures16.pdf]

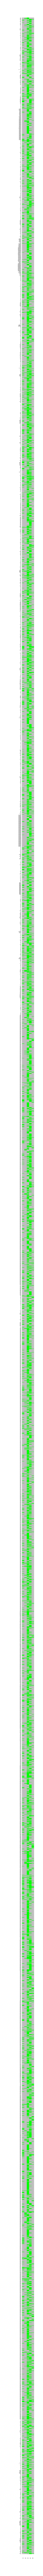

Supplement: figures17.pdf [file figures17.pdf]

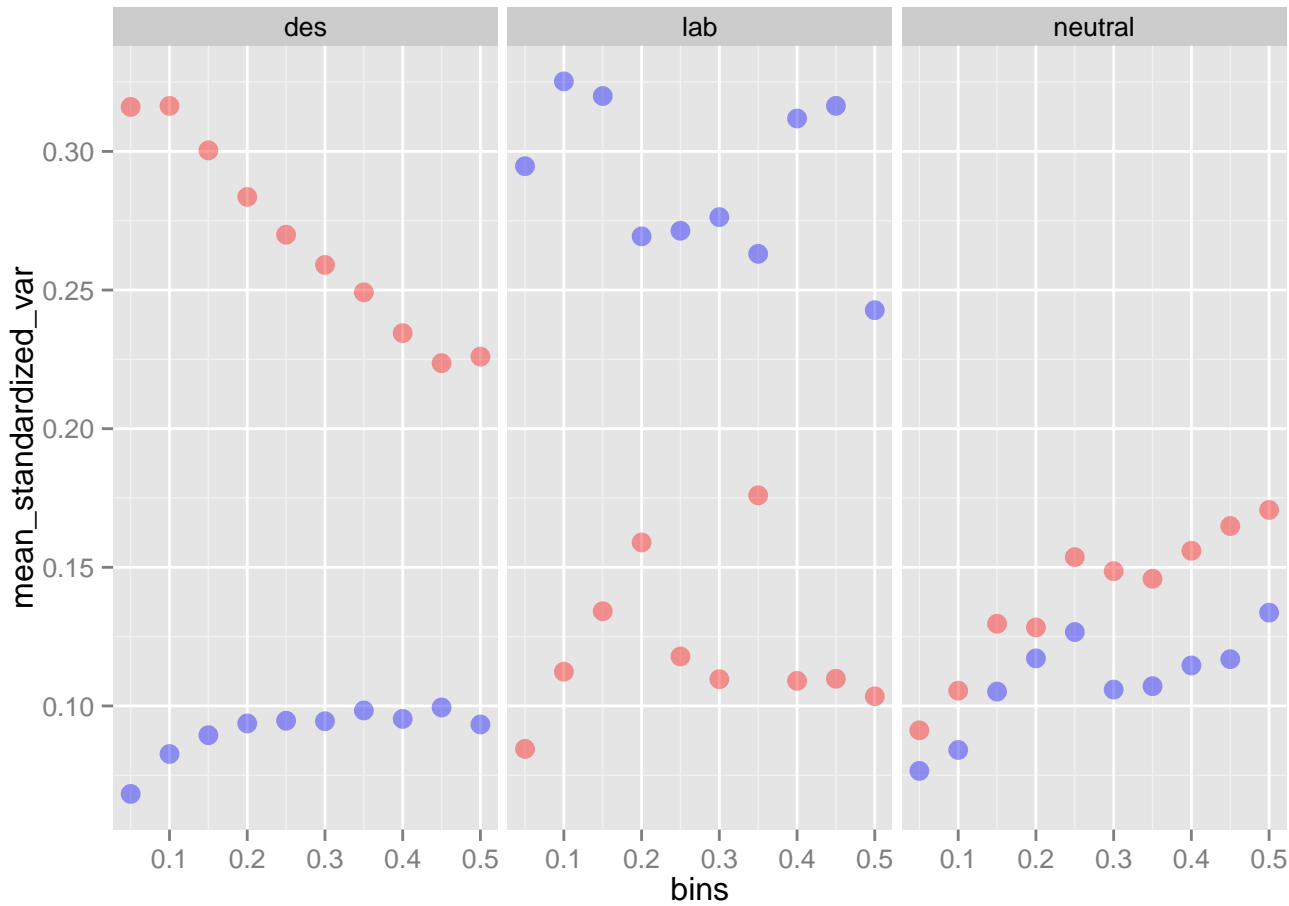

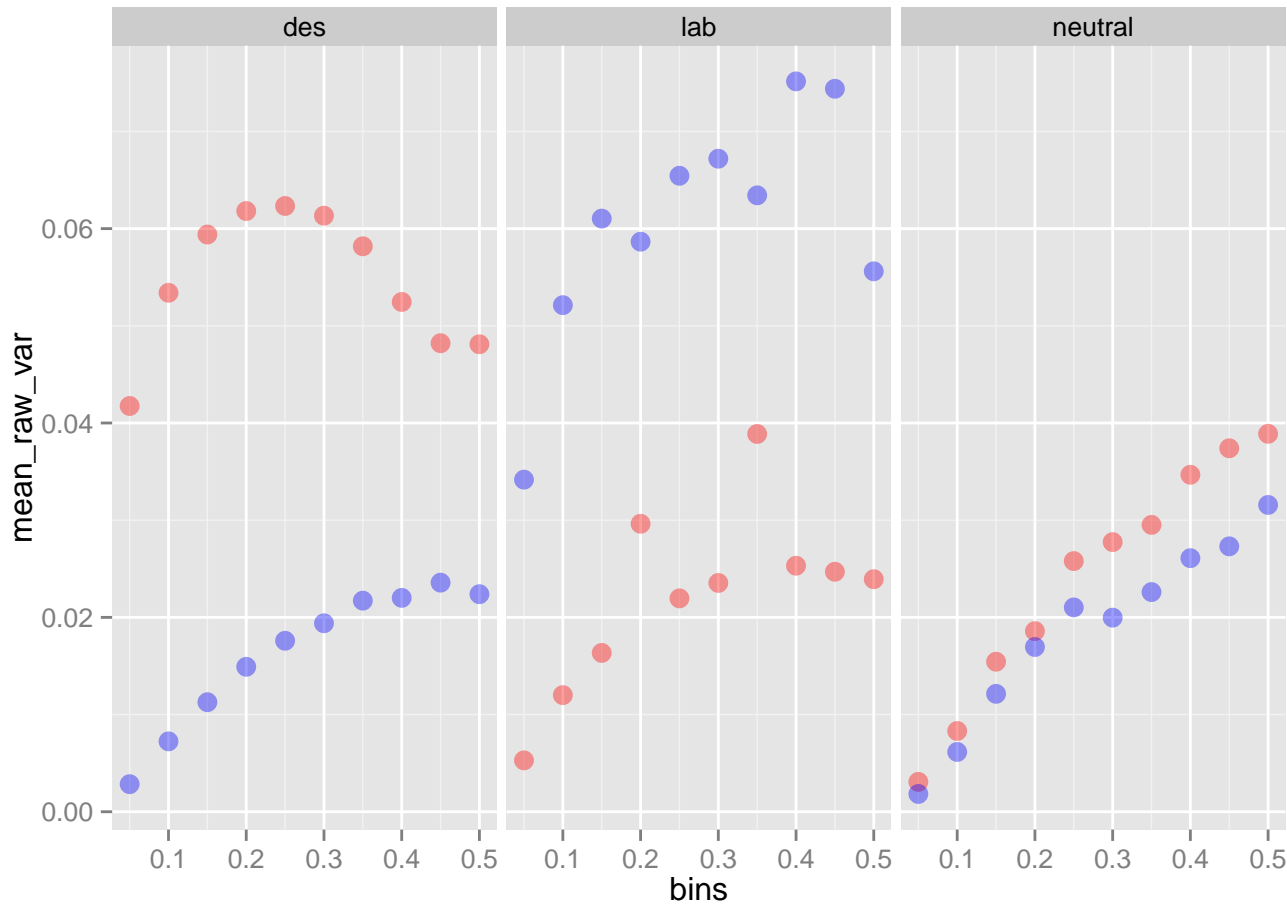

Supplement: figures19.pdf [file figures19.pdf]

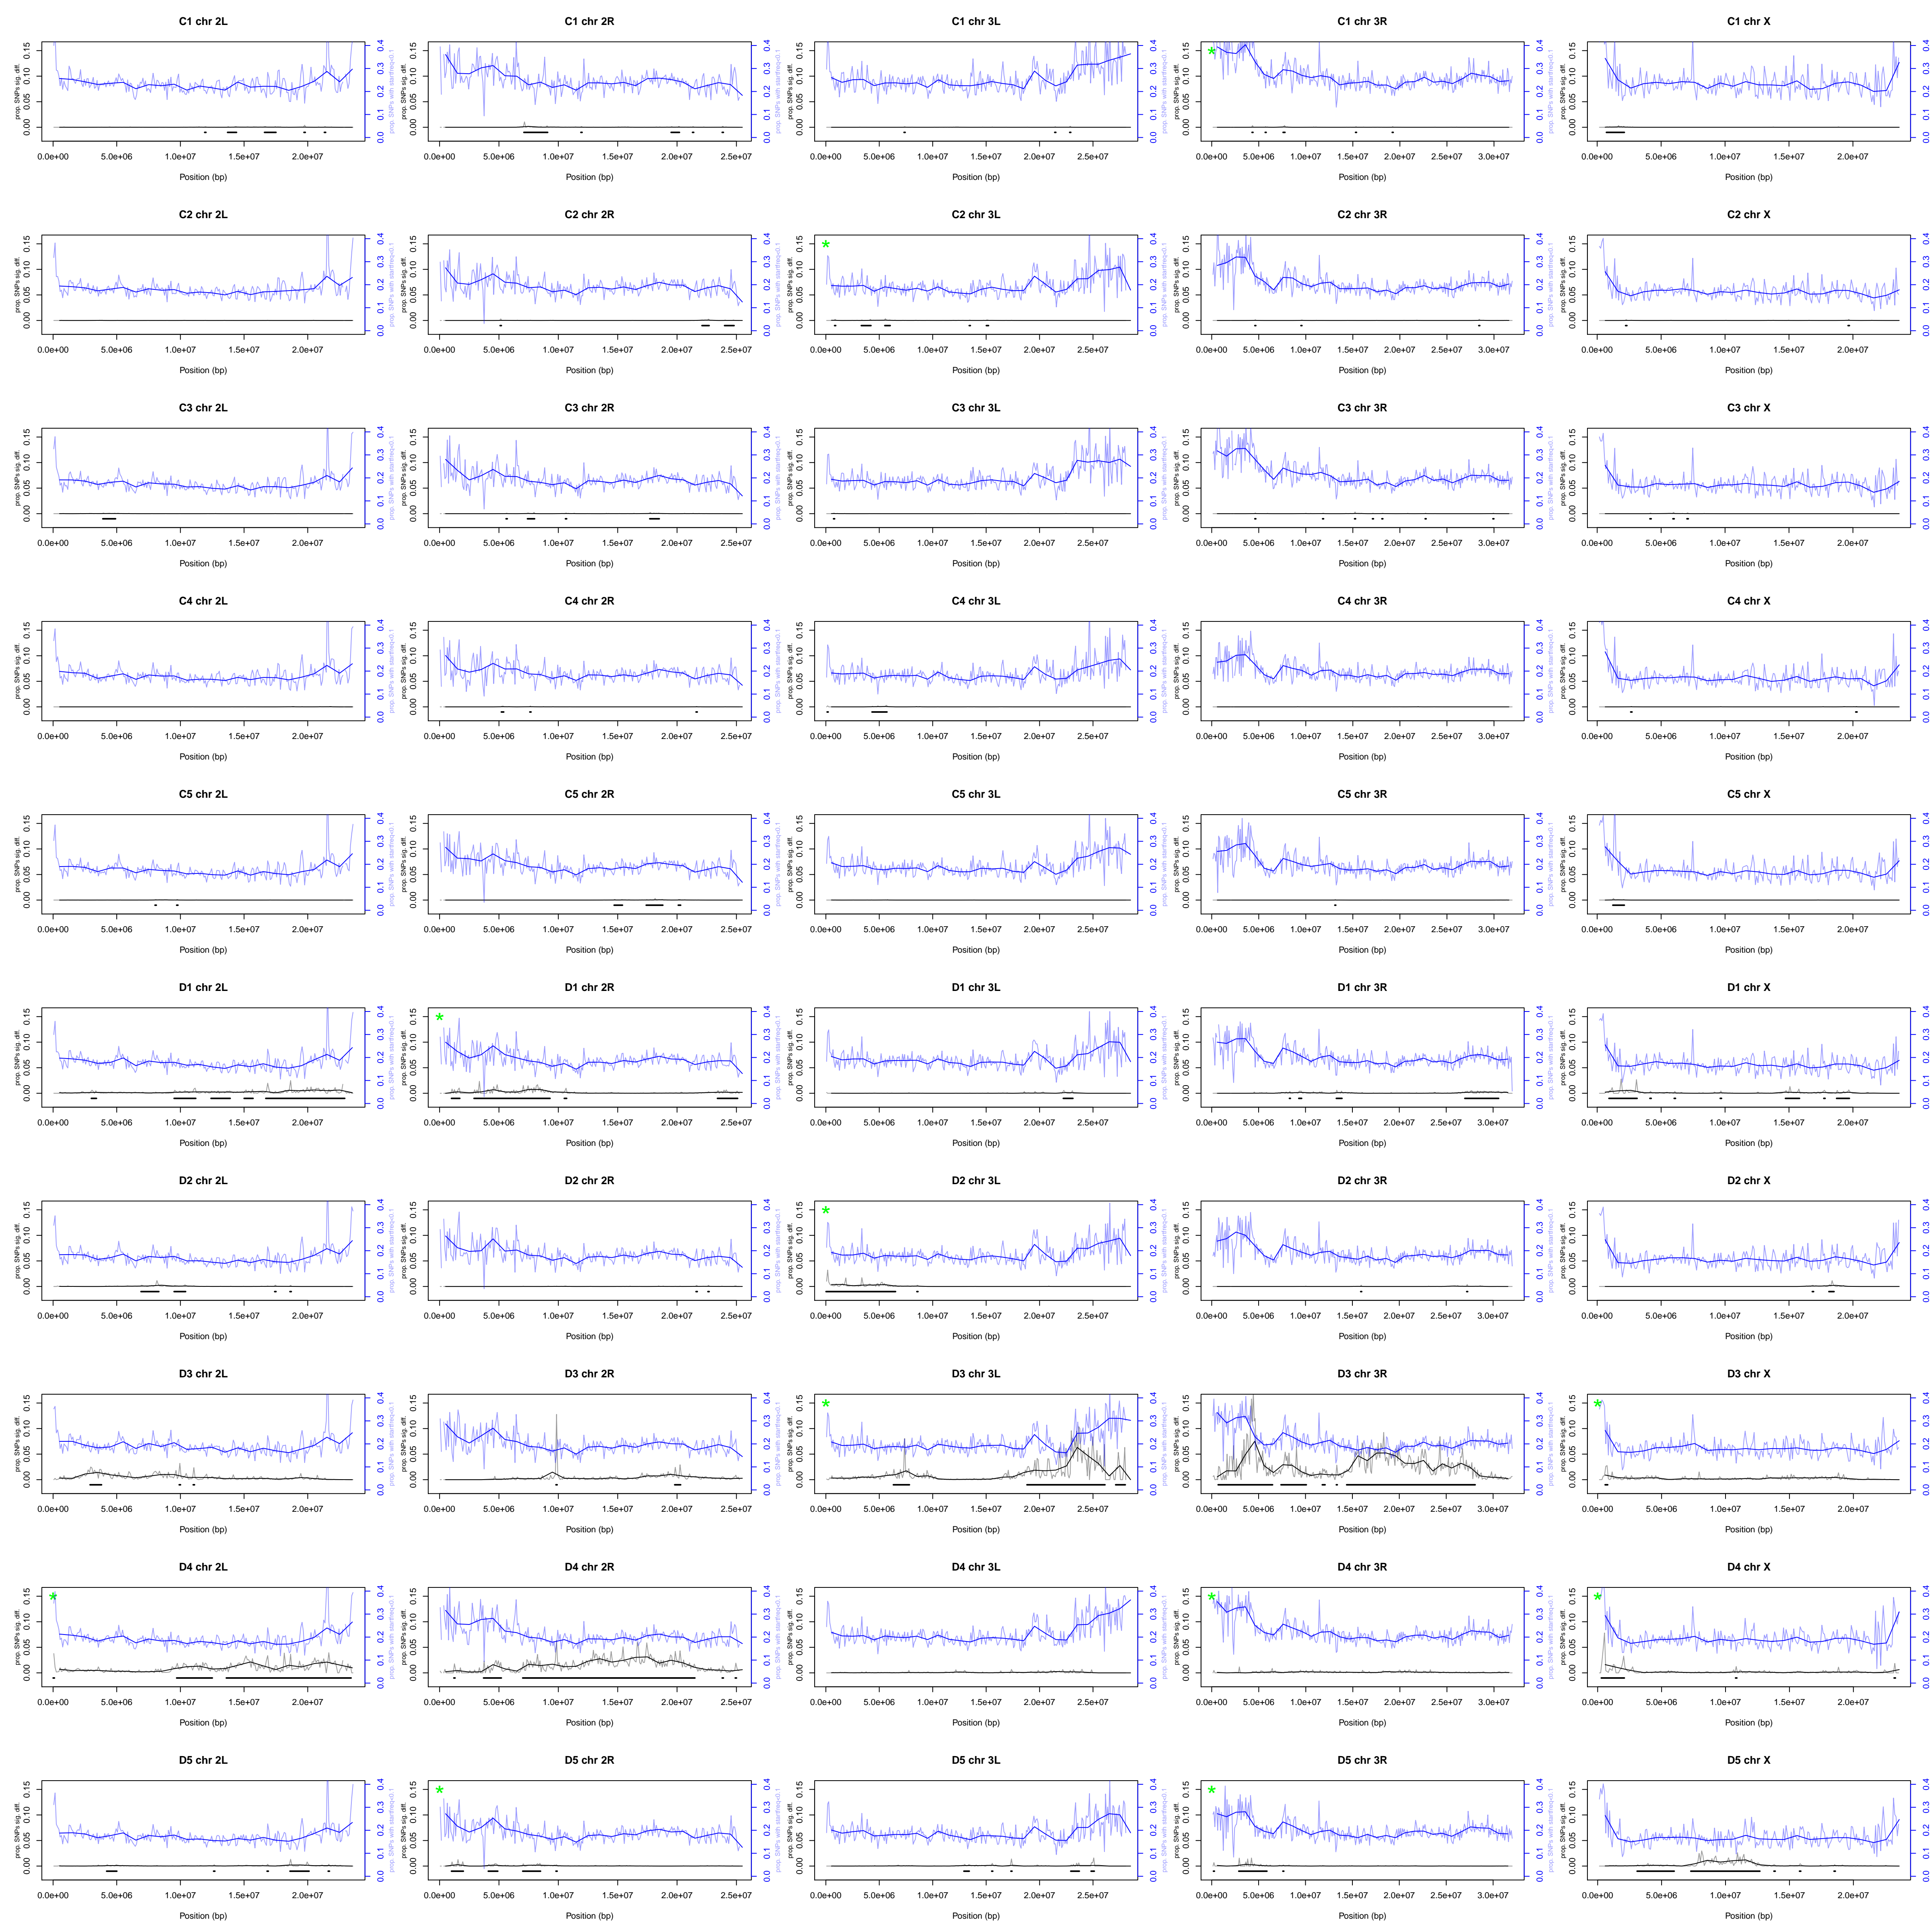

Supplement: figures2.pdf [file figures2.pdf]

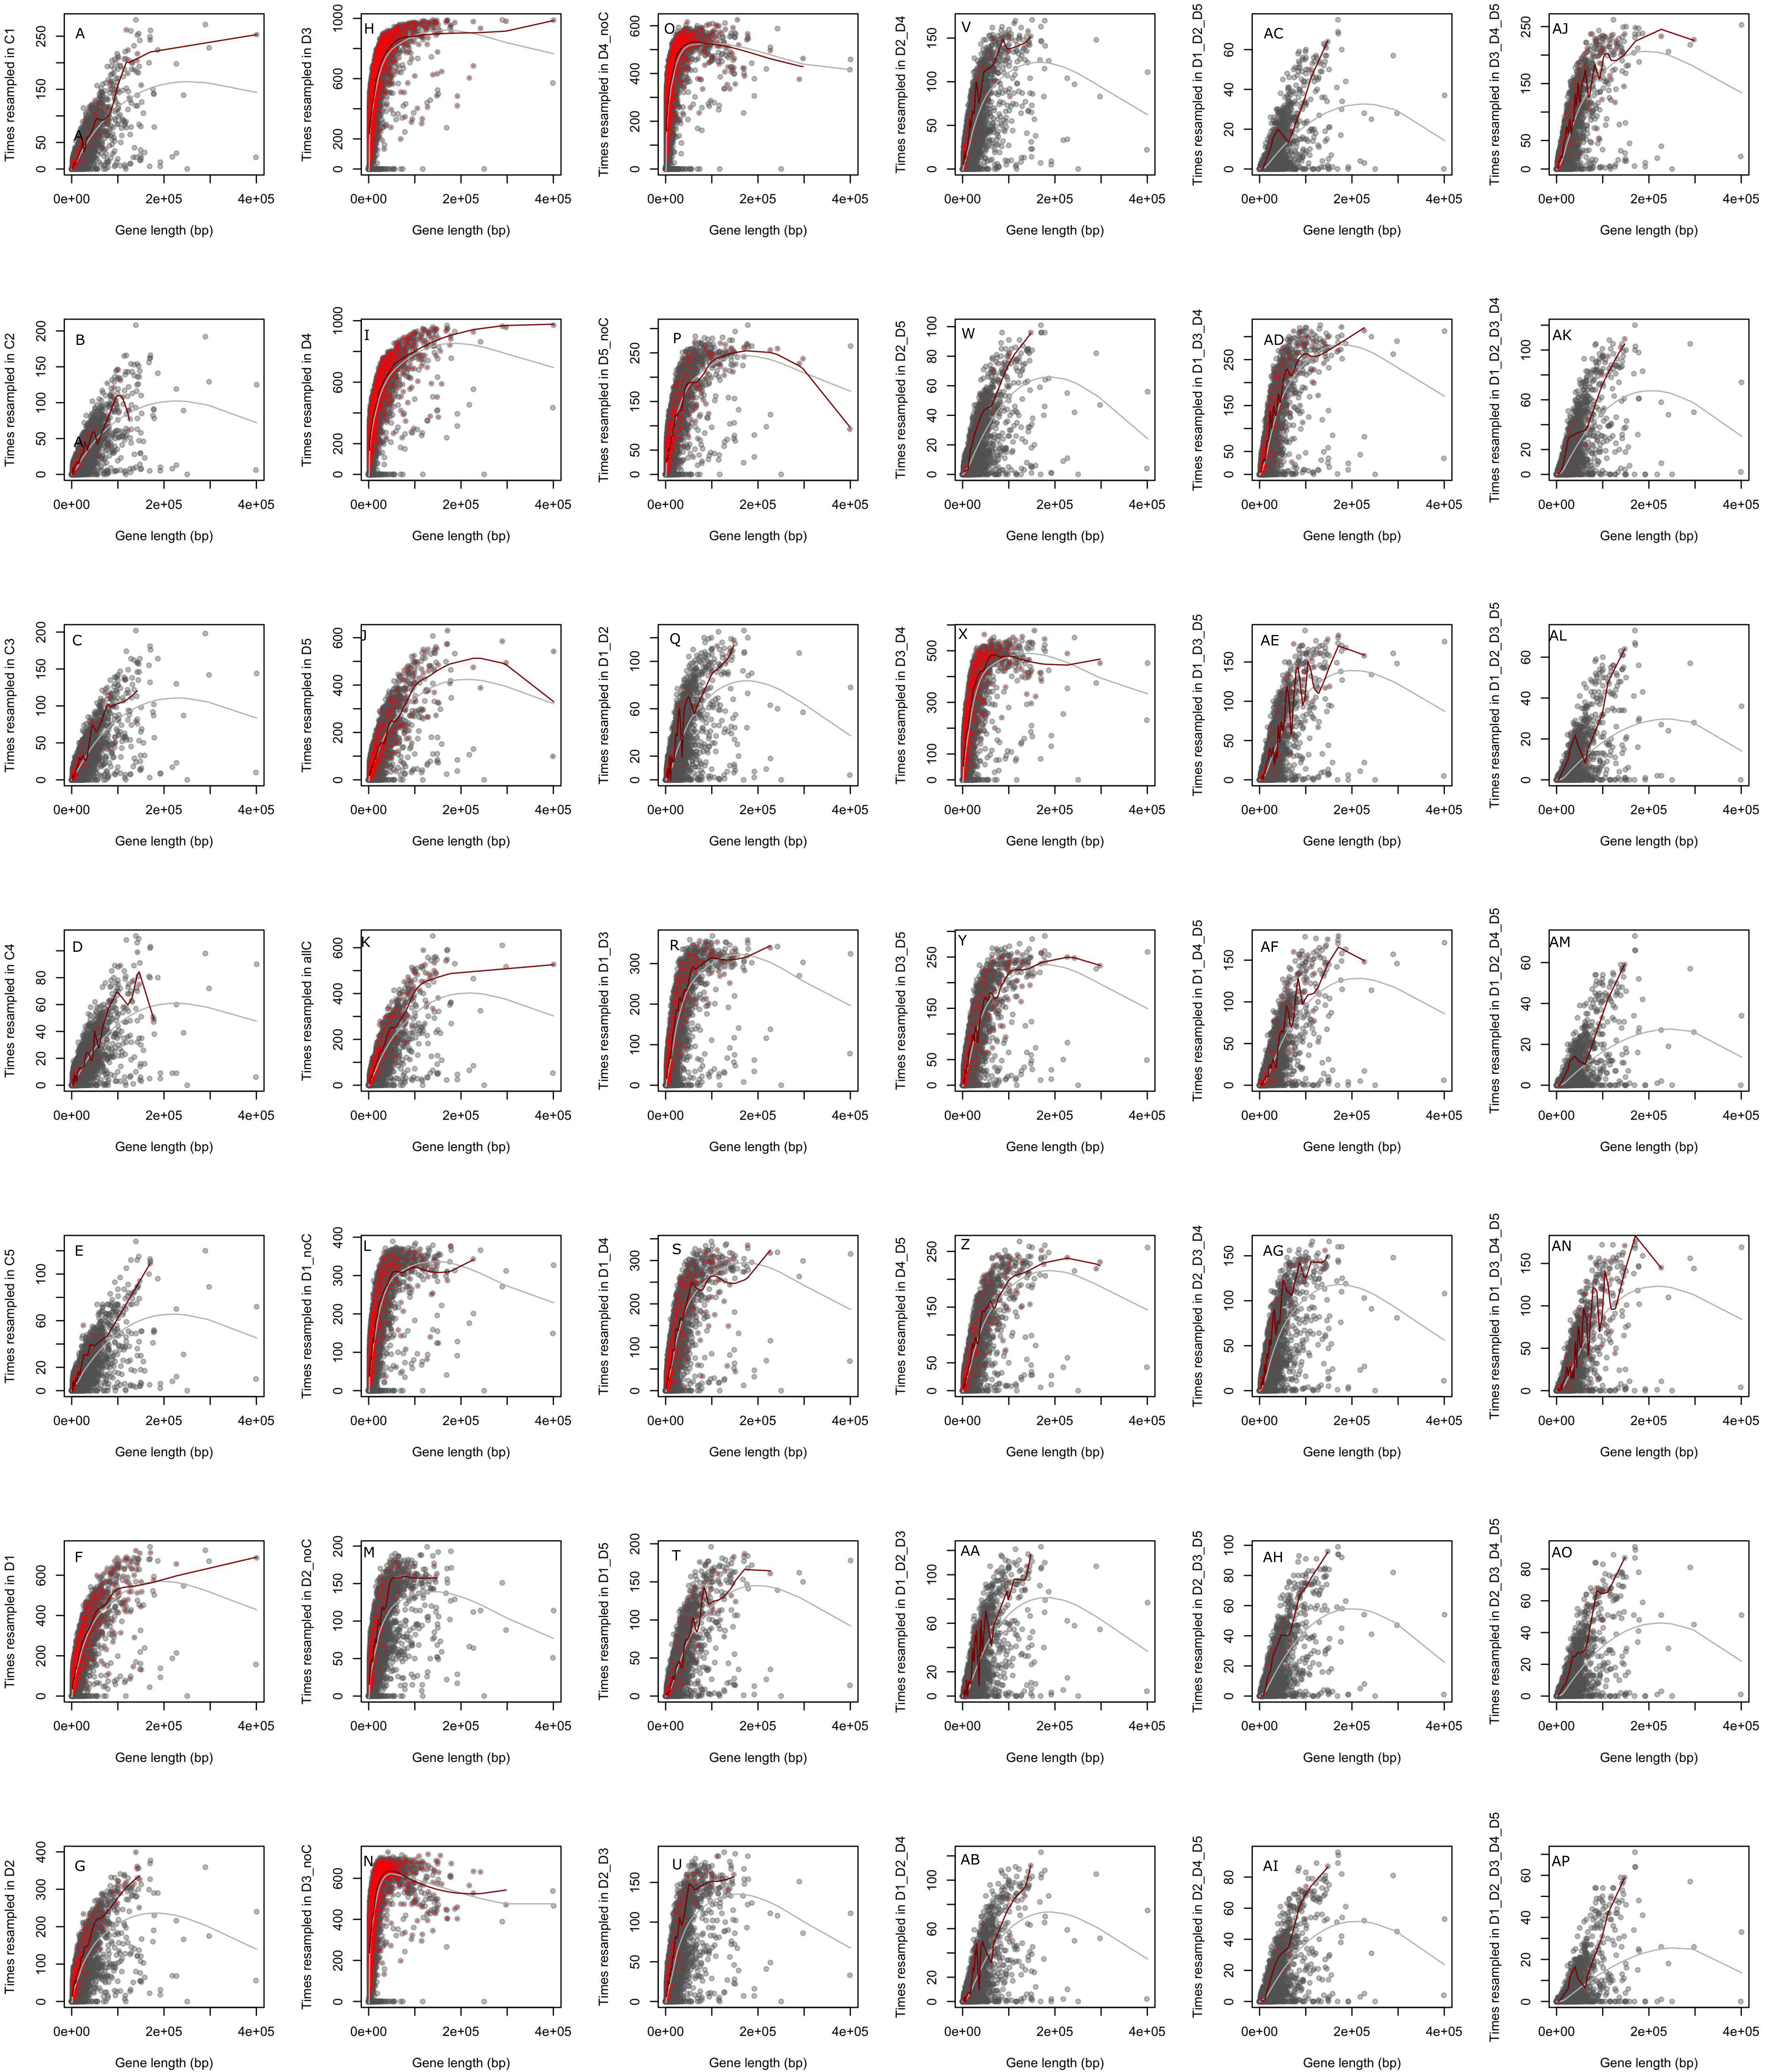

Supplement: figures20.pdf [file figures20.pdf]

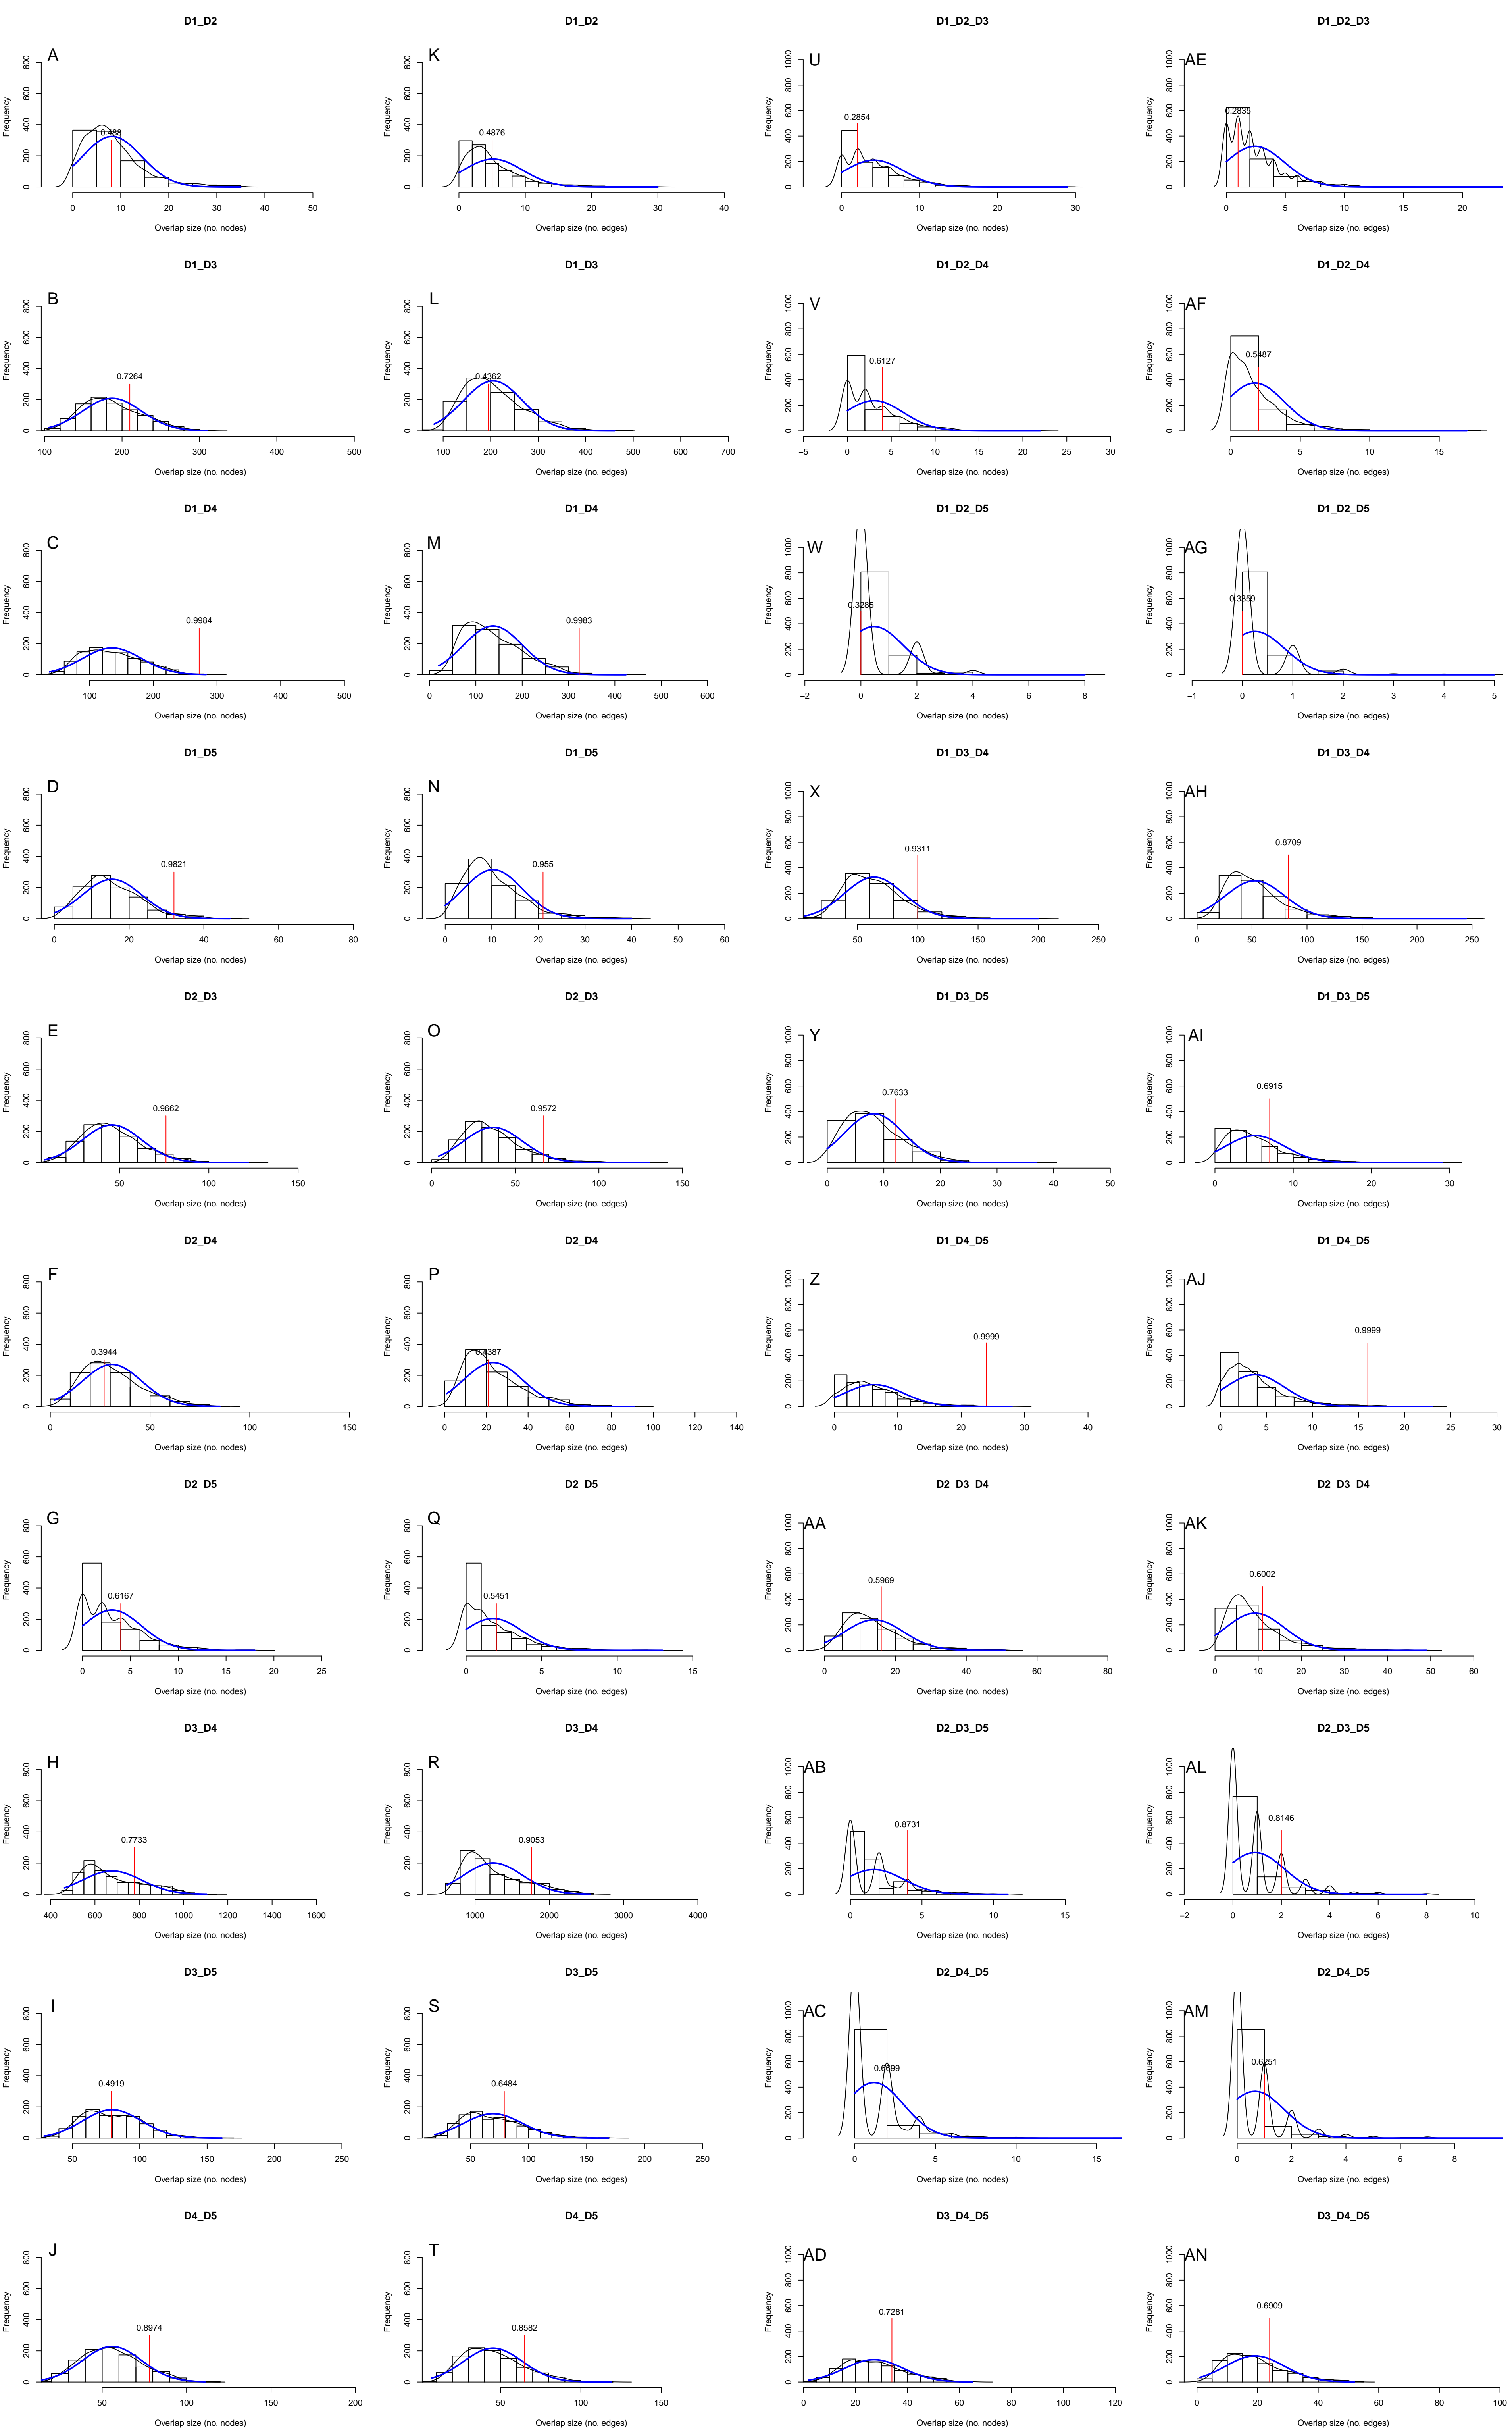

Supplement: figures21.pdf [file figures21.pdf]

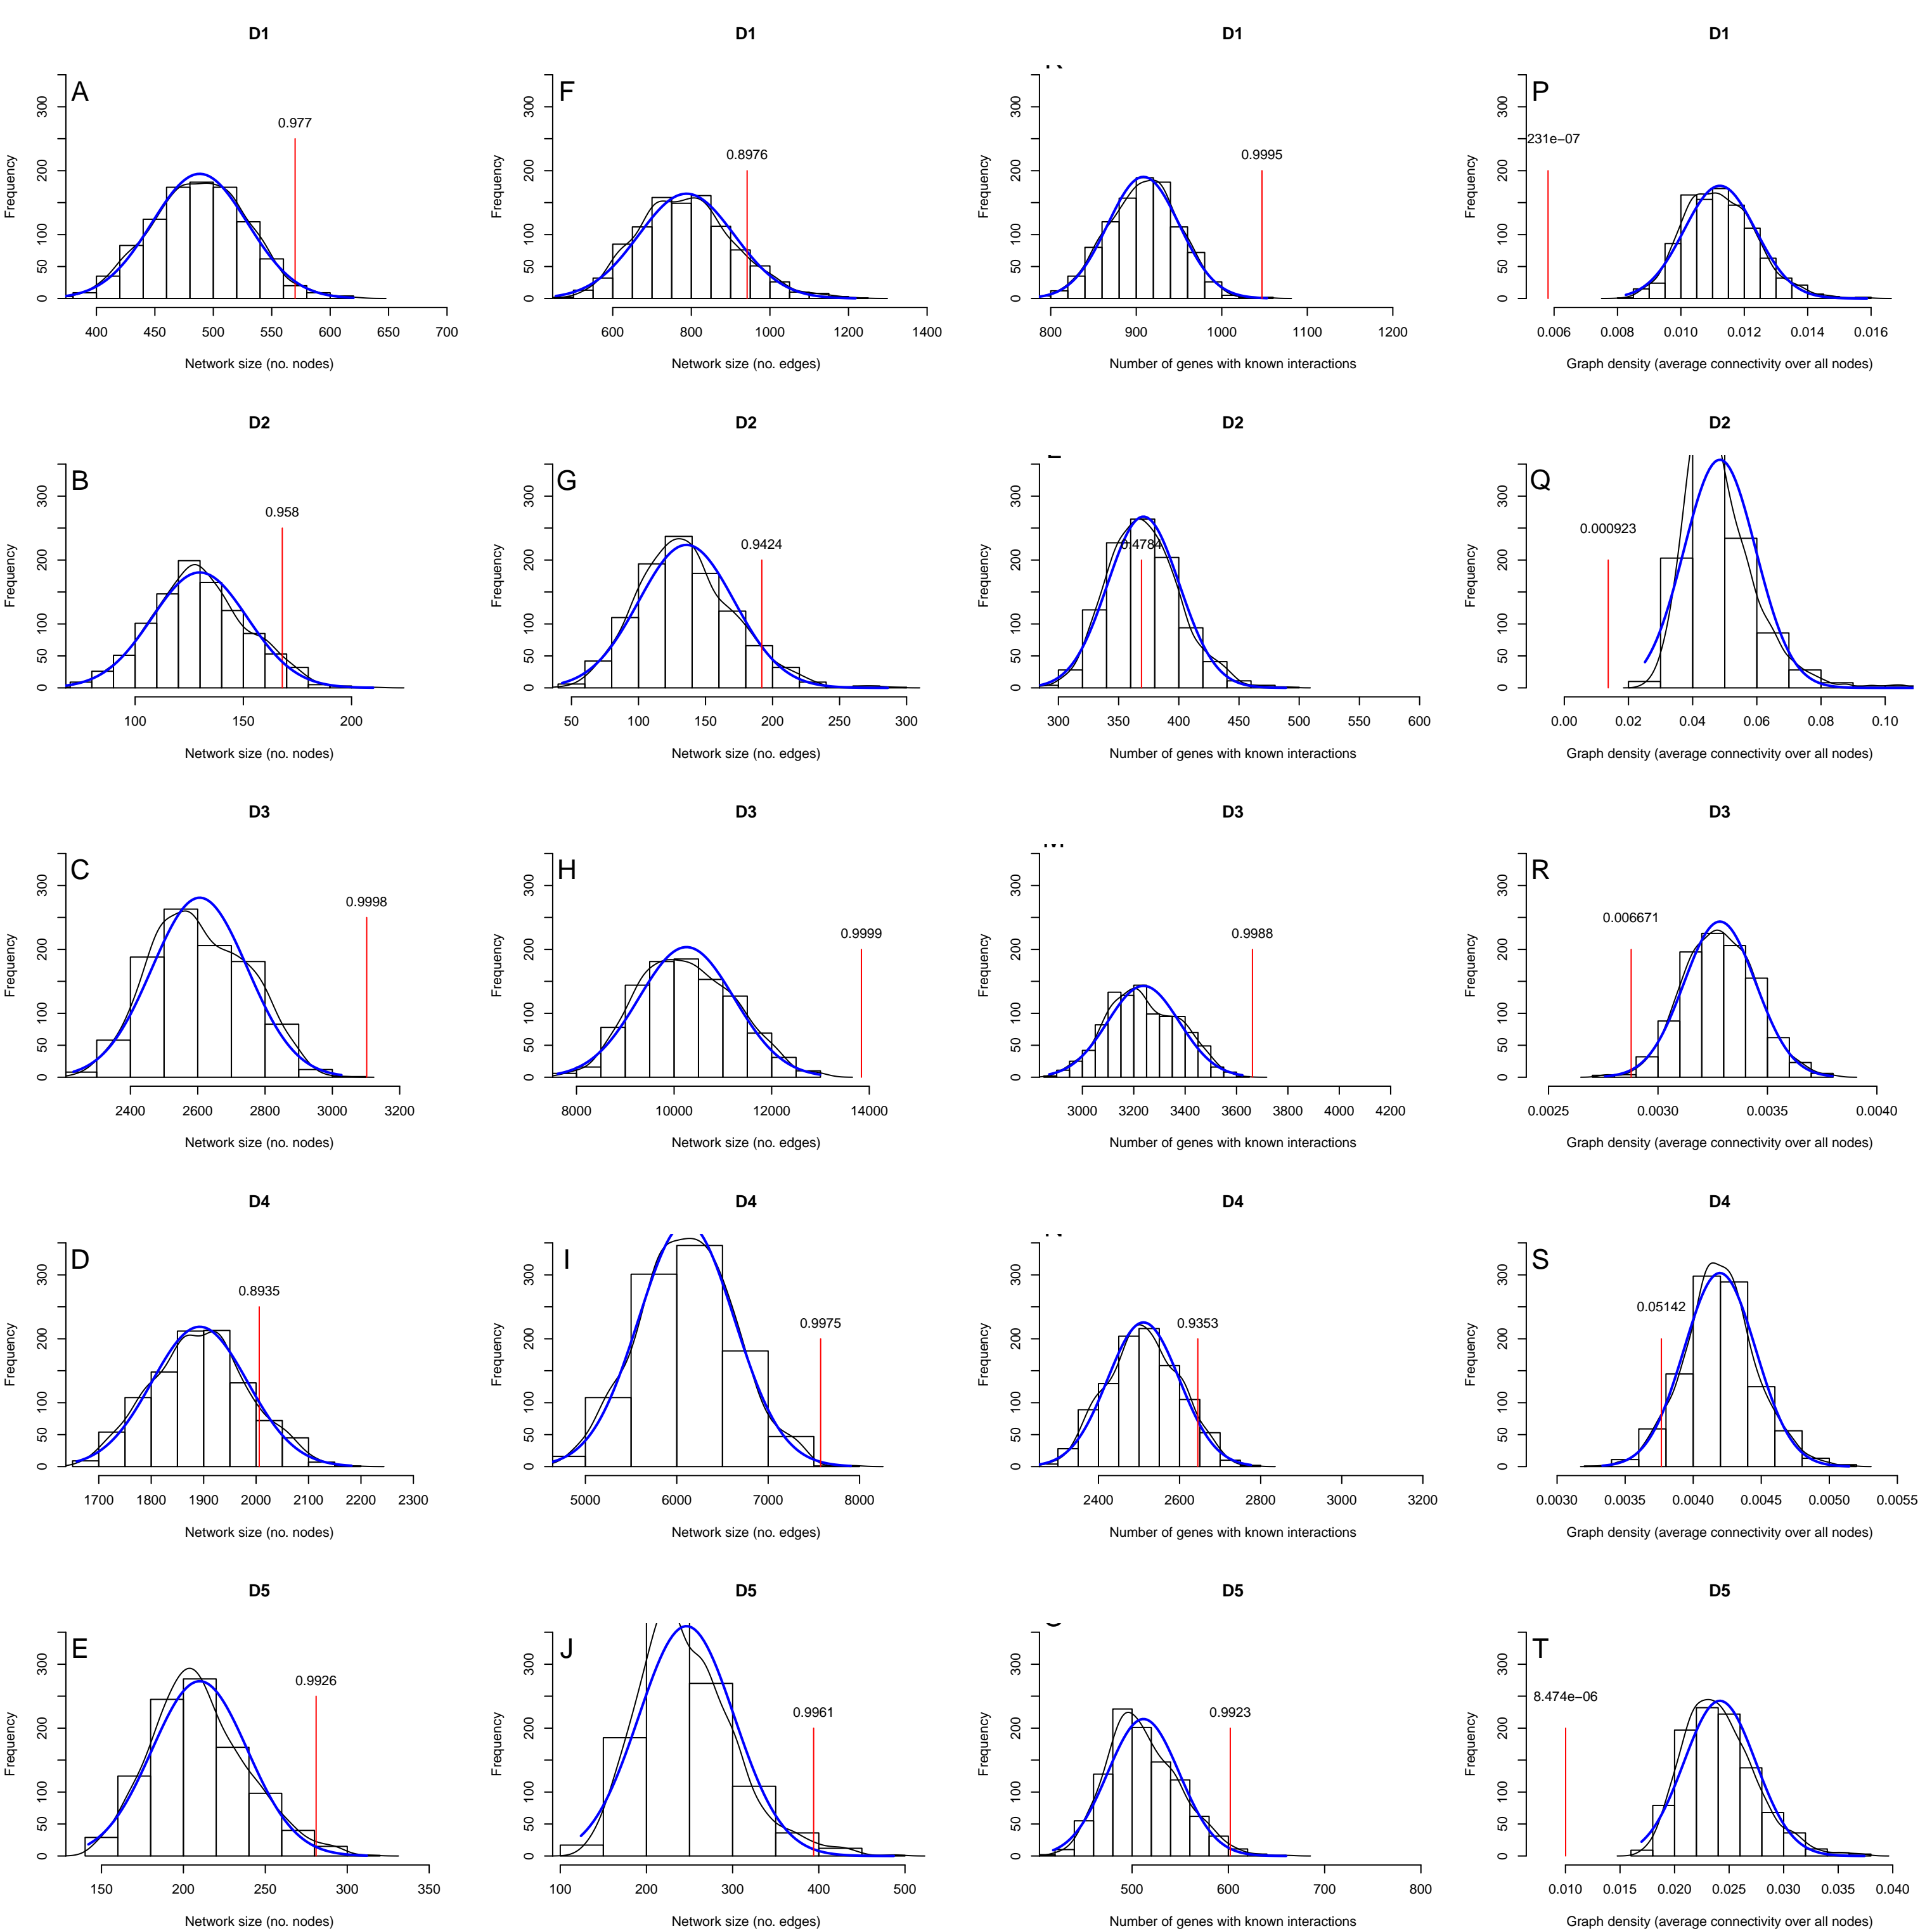

Supplement: figures22.pdf [file figures22.pdf]

**C1**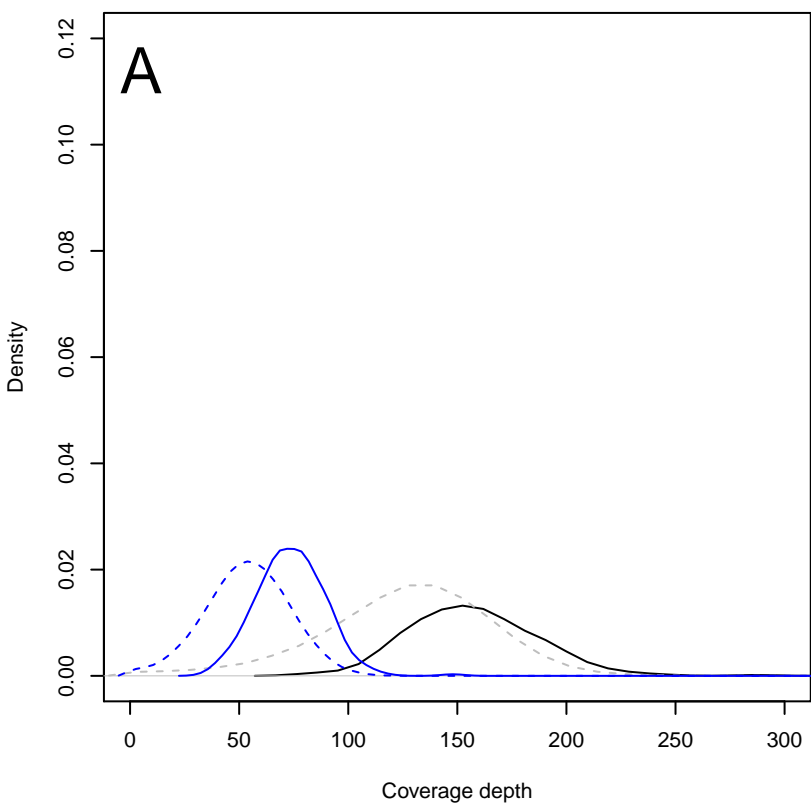**D1**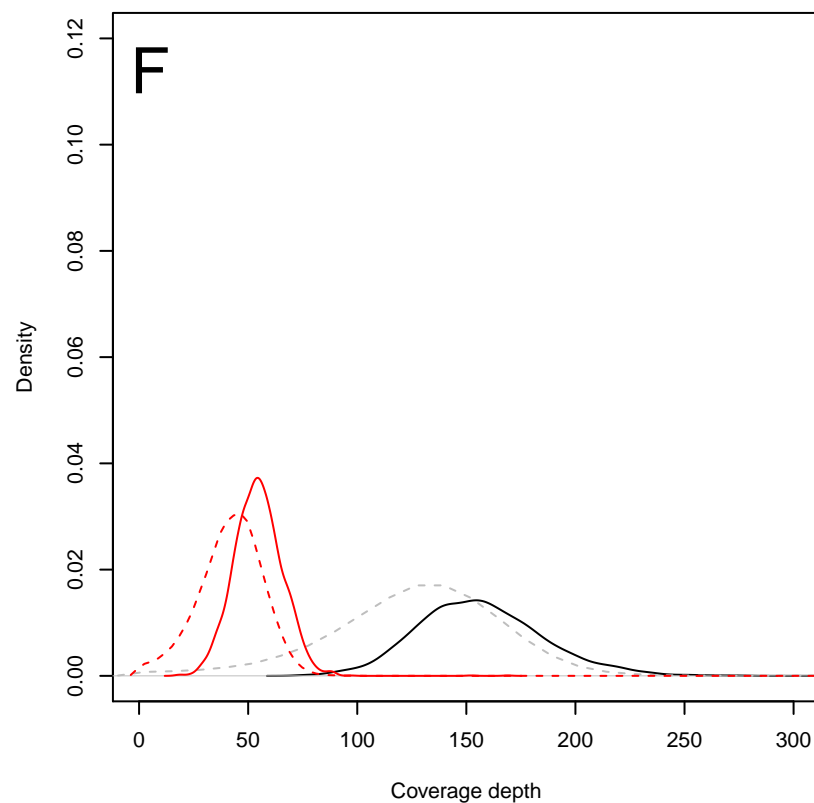**C2**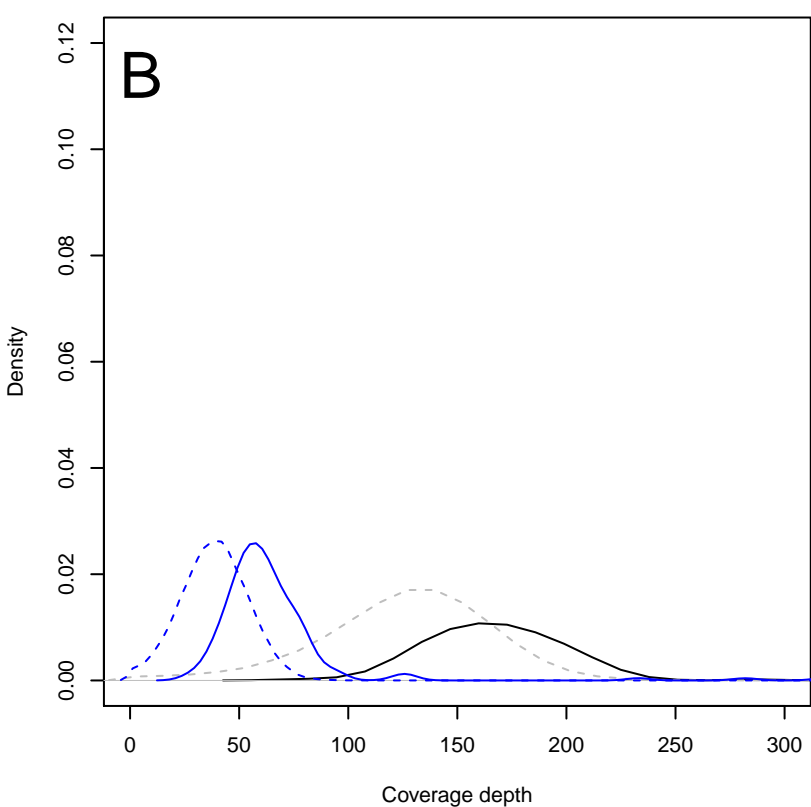**D2**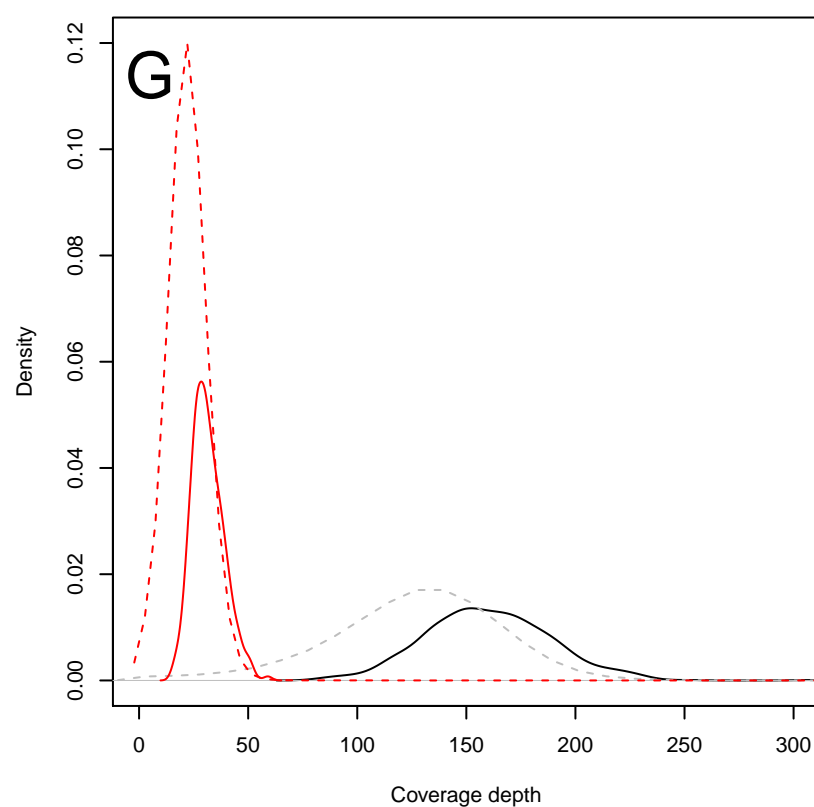**C3**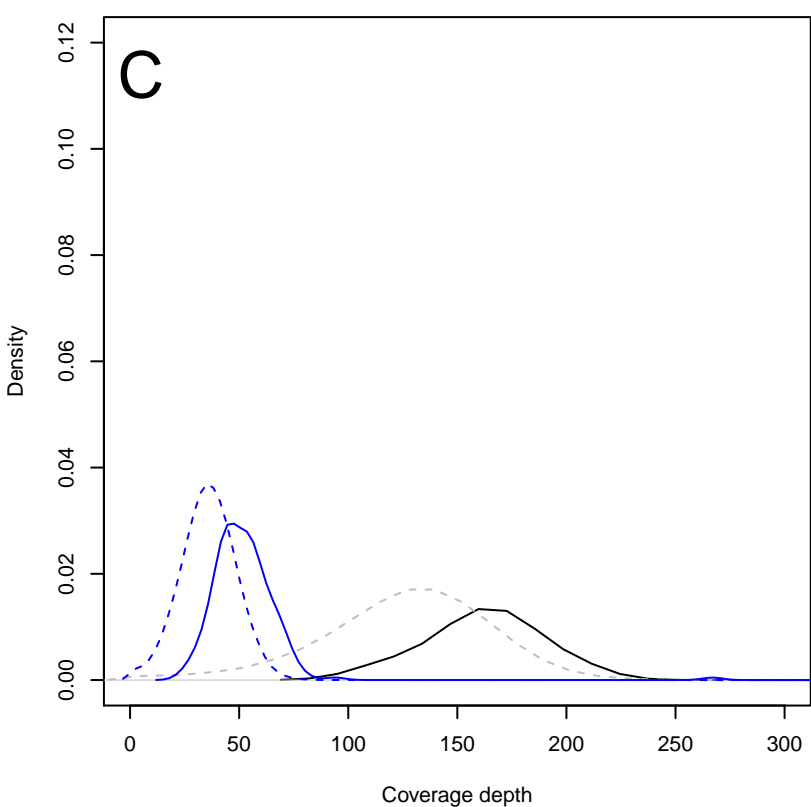**D3**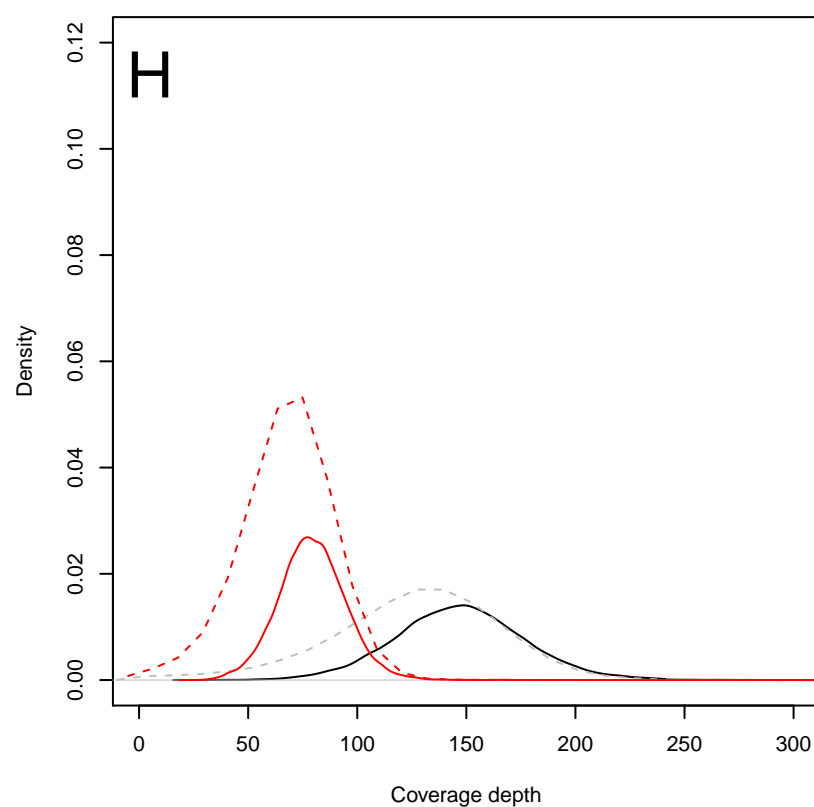**C4**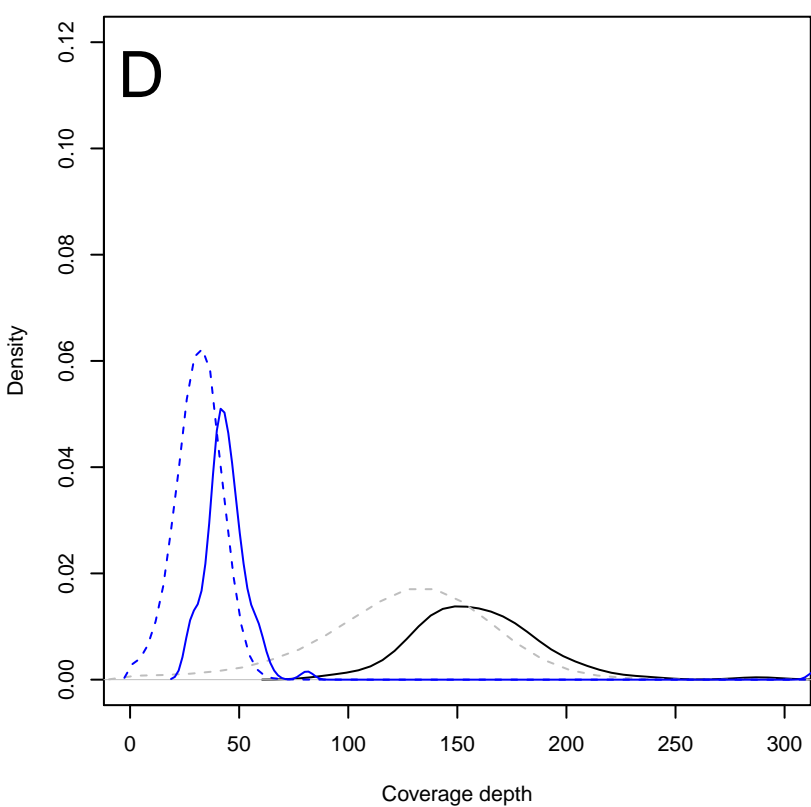**D4**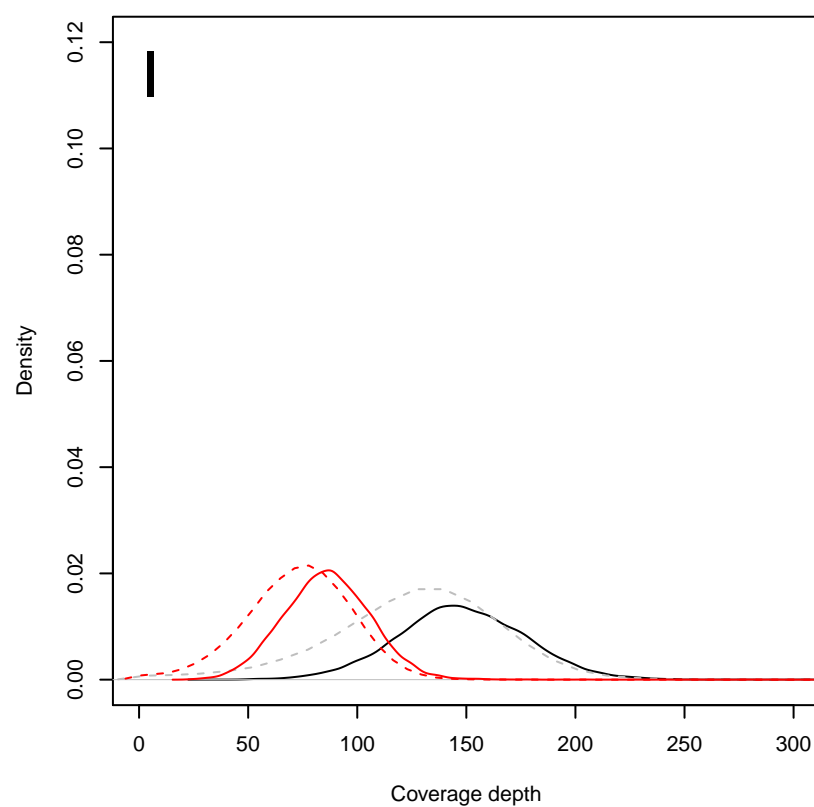**C5**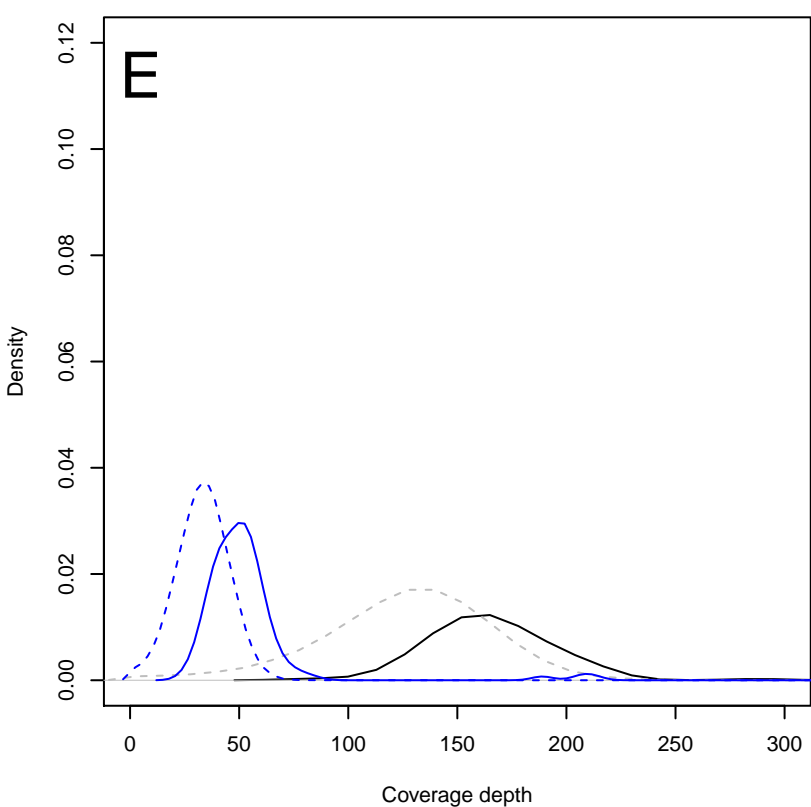**D5**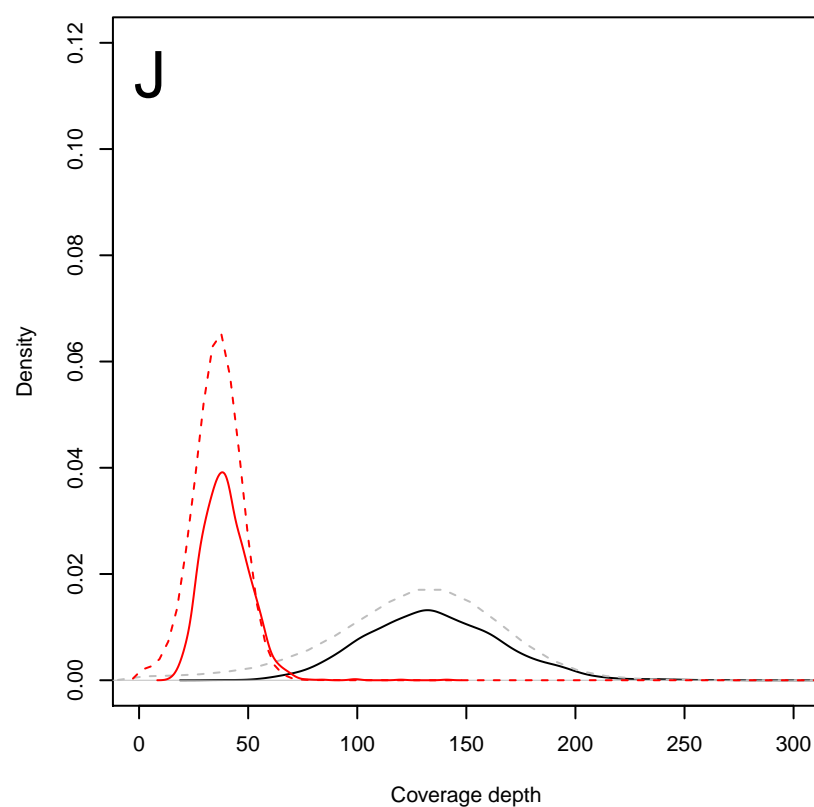

Supplement: figures3.pdf [file figures3.pdf]

Frequency change for candidate SNPs

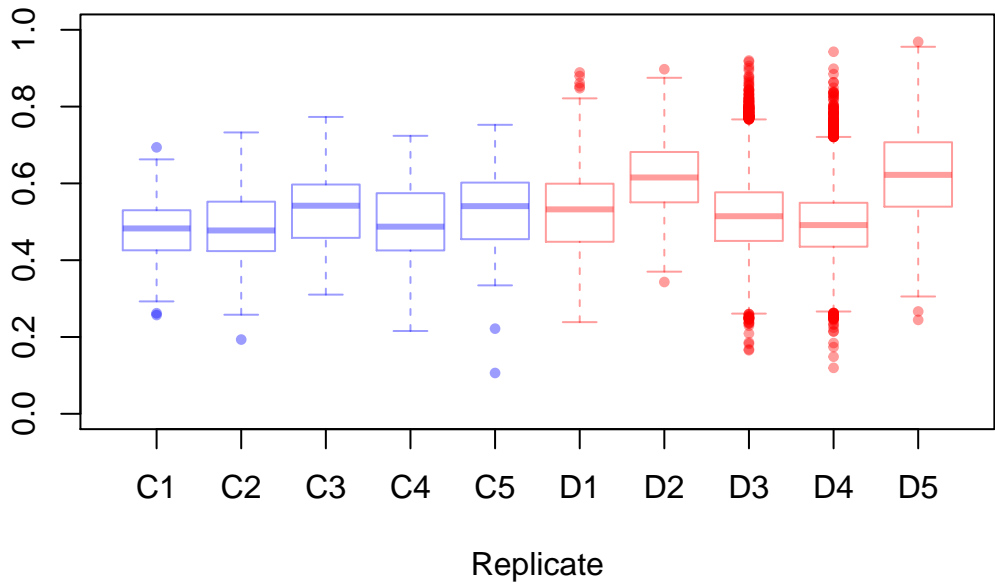

Supplement: figures4.pdf [file figures4.pdf]

### Linked Gene ~10Kbp from Causal Gene

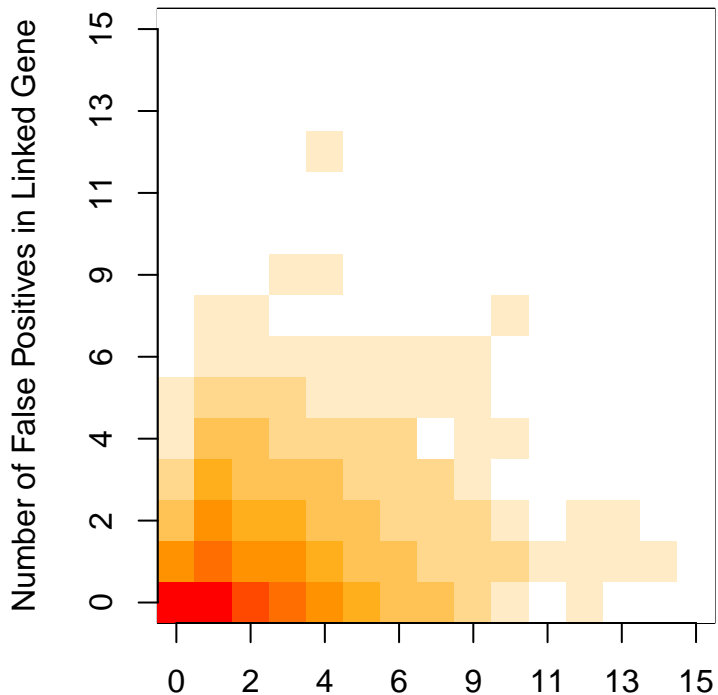

### Linked Gene ~1Mbp from Causal Gene

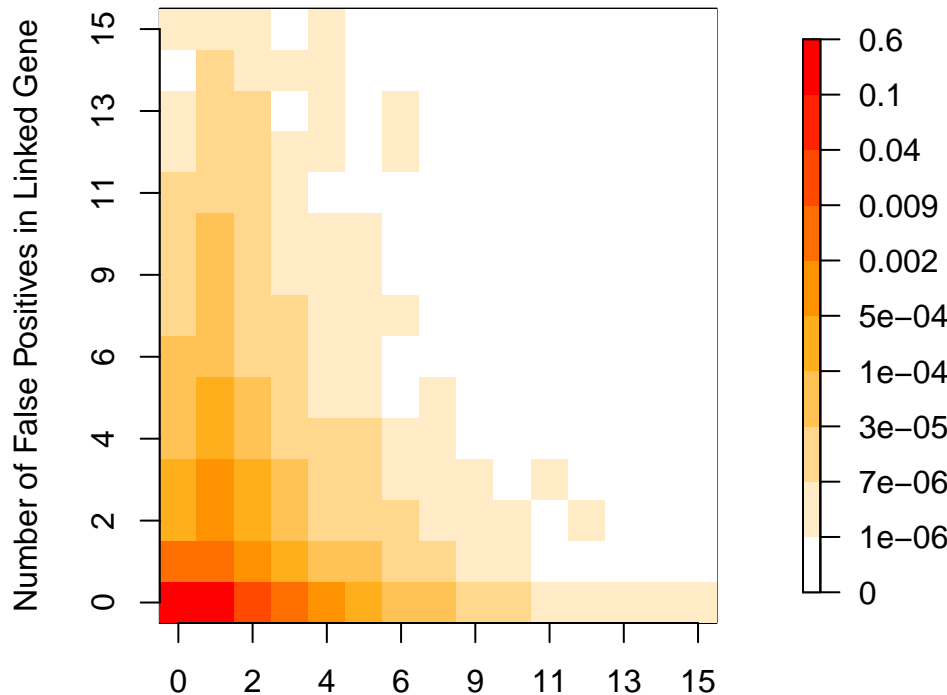

Supplement: figures5.pdf [file figures5.pdf]

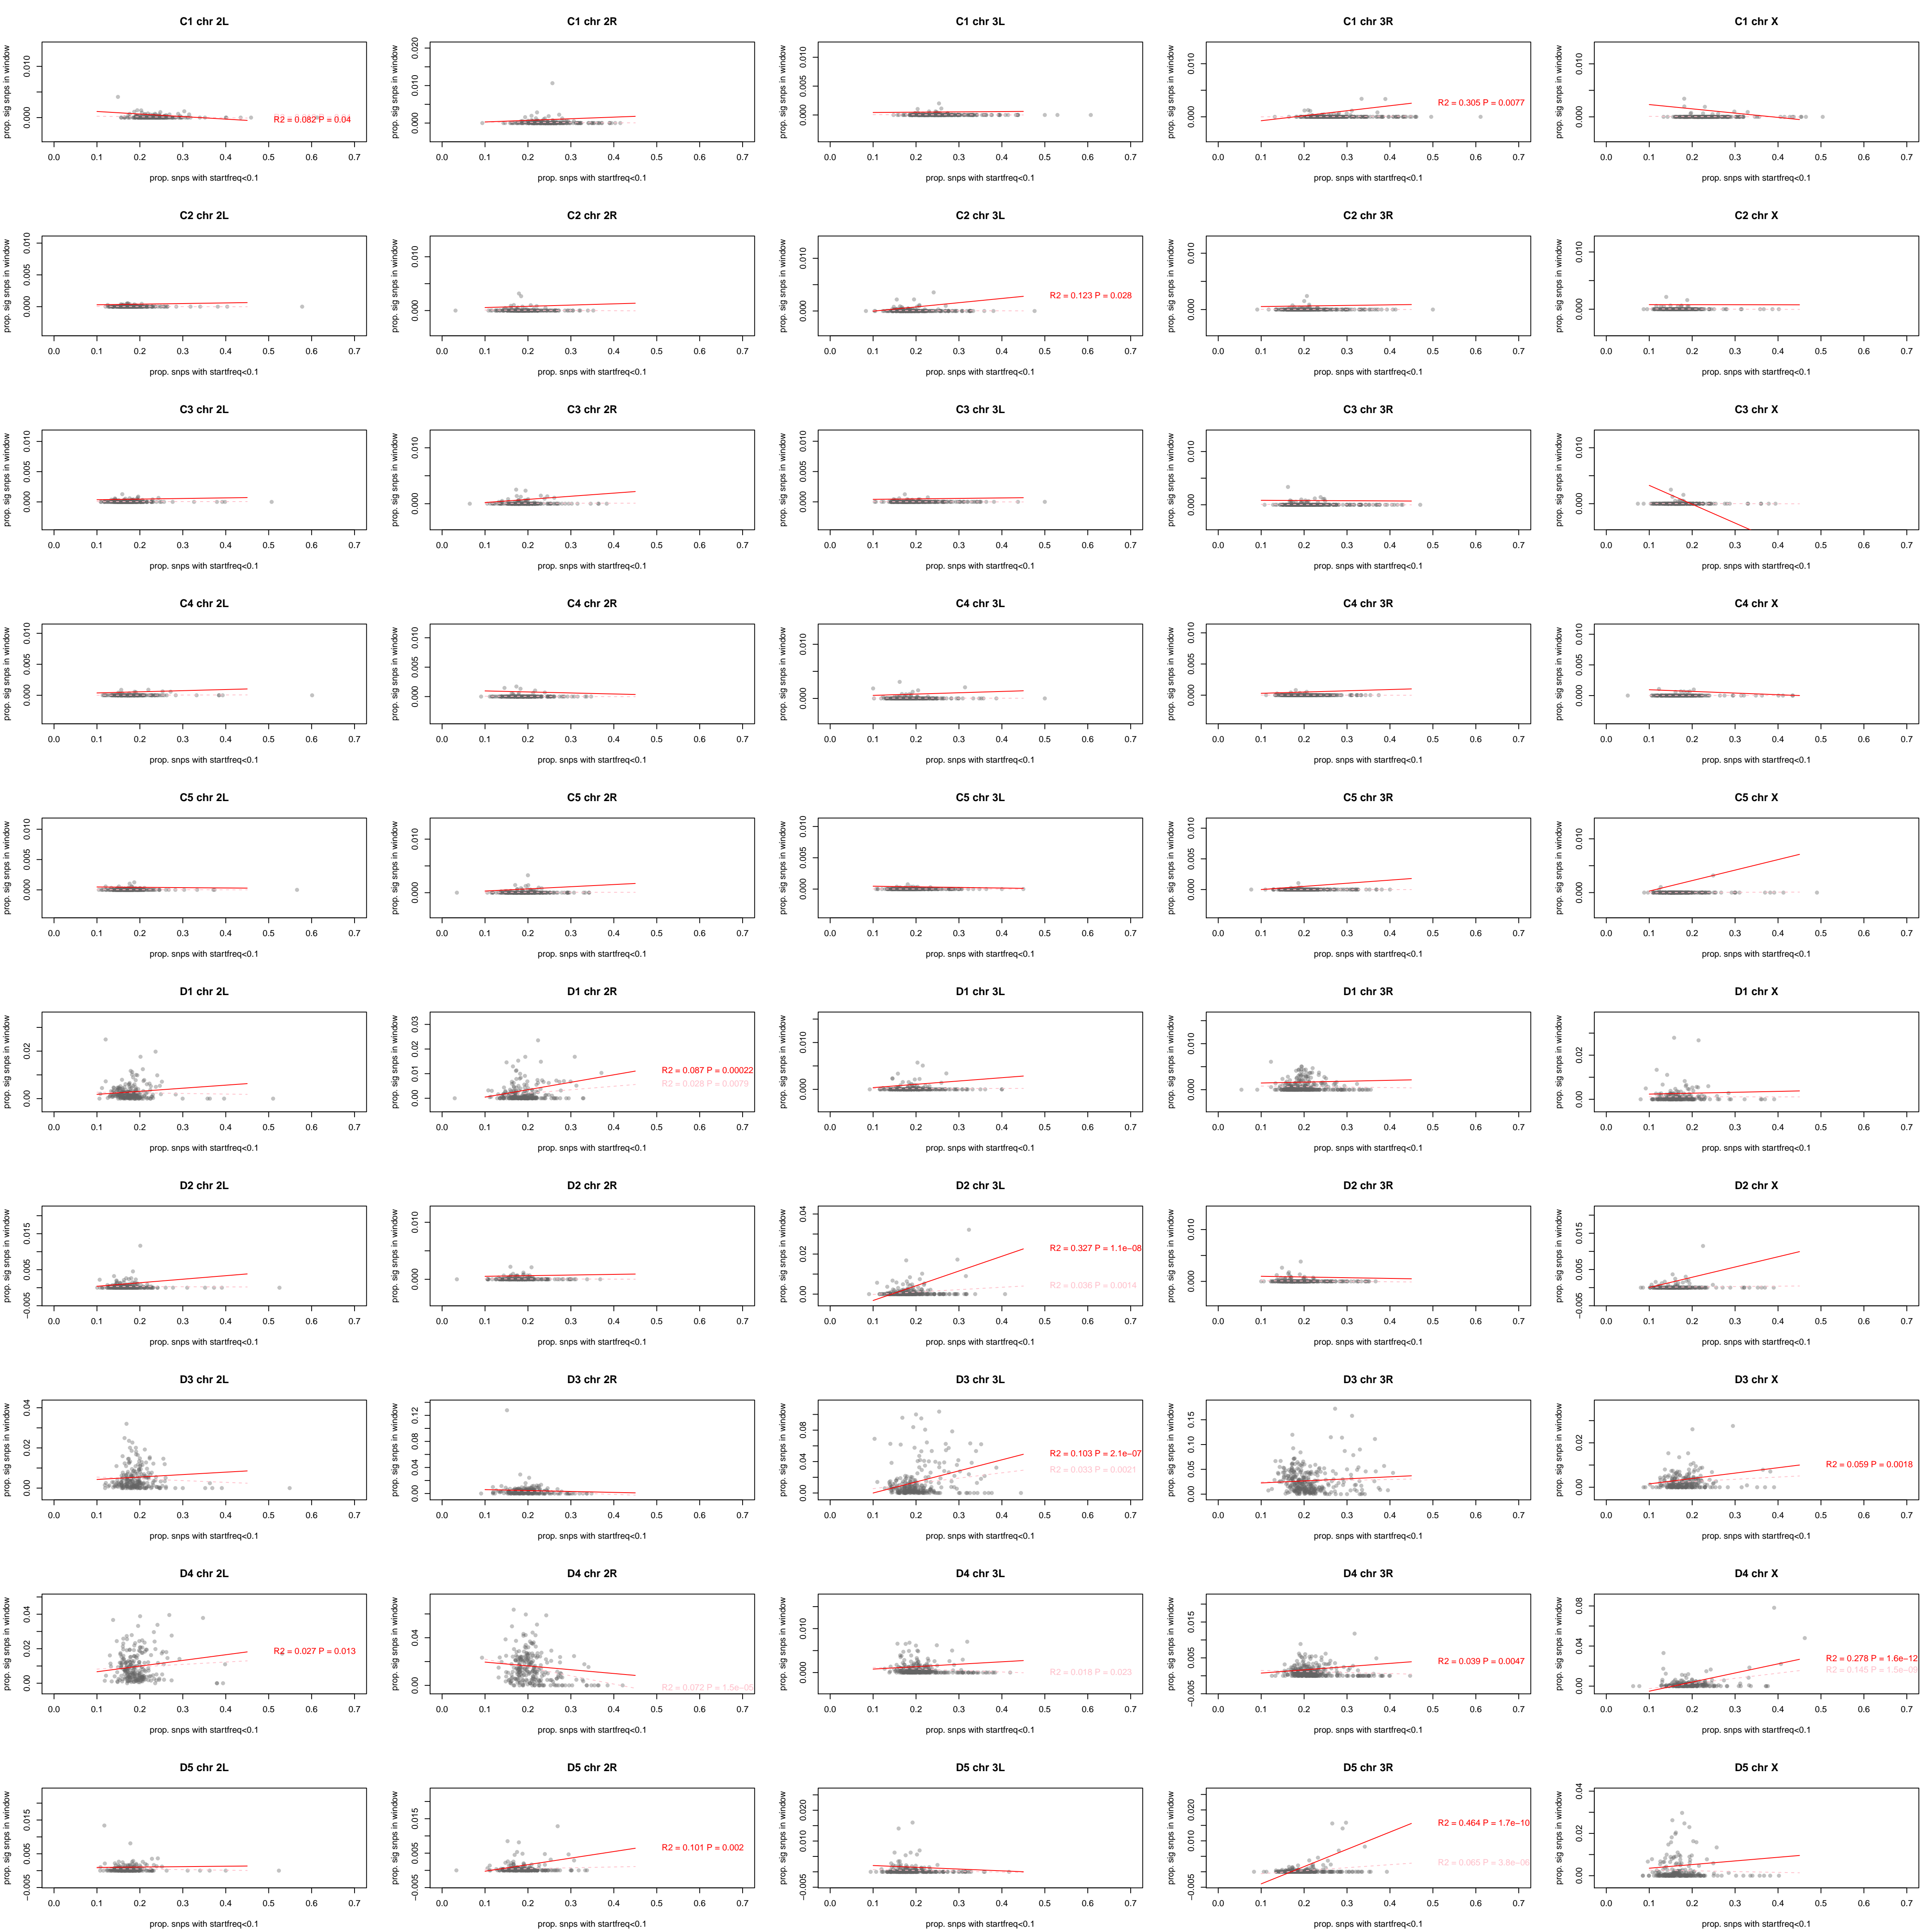

Supplement: figures6.pdf [file figures6.pdf]

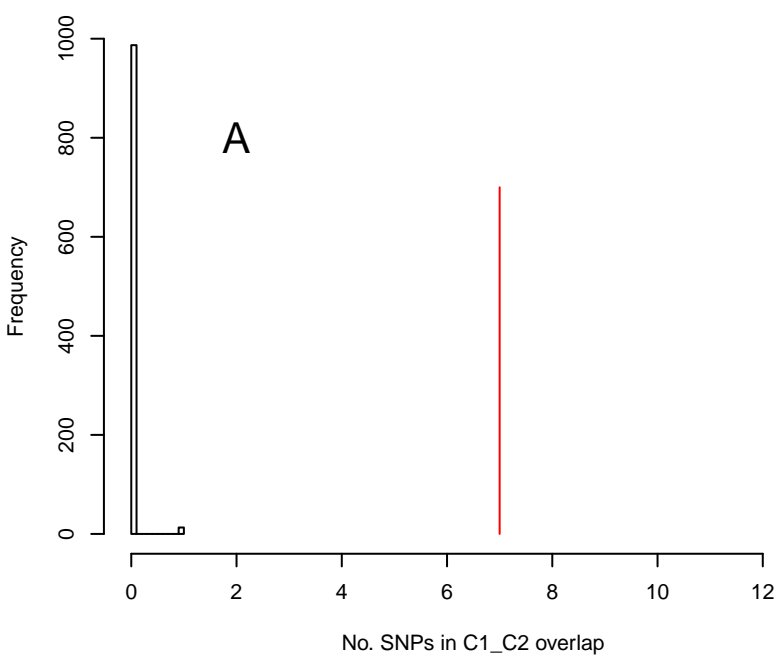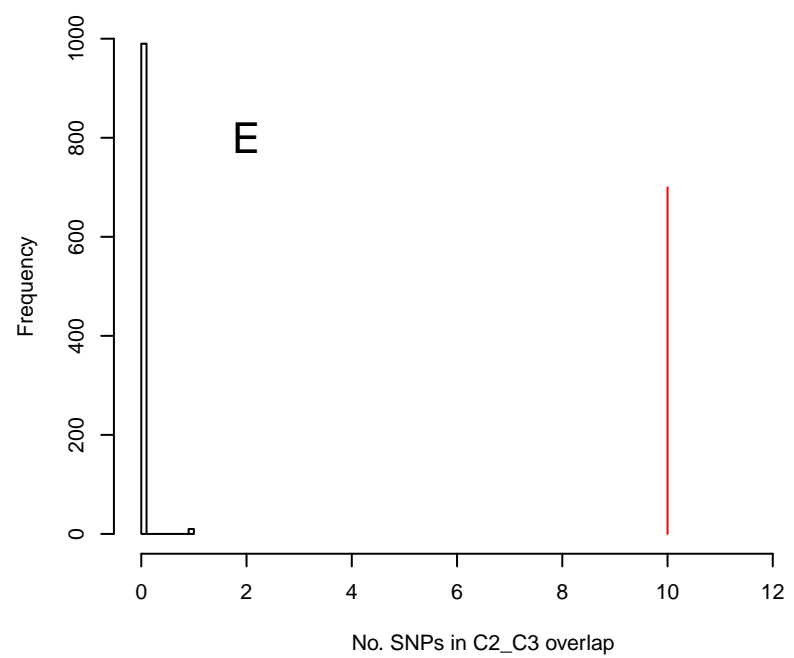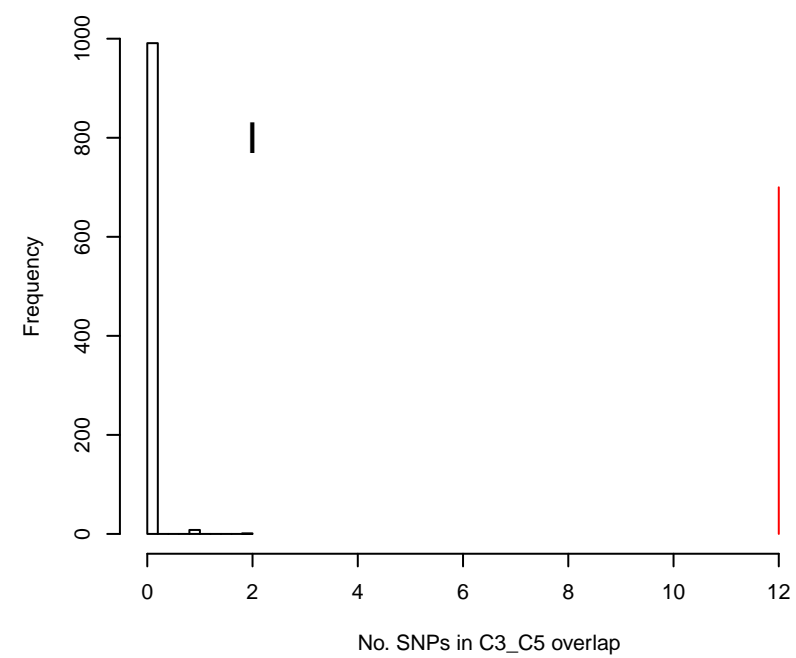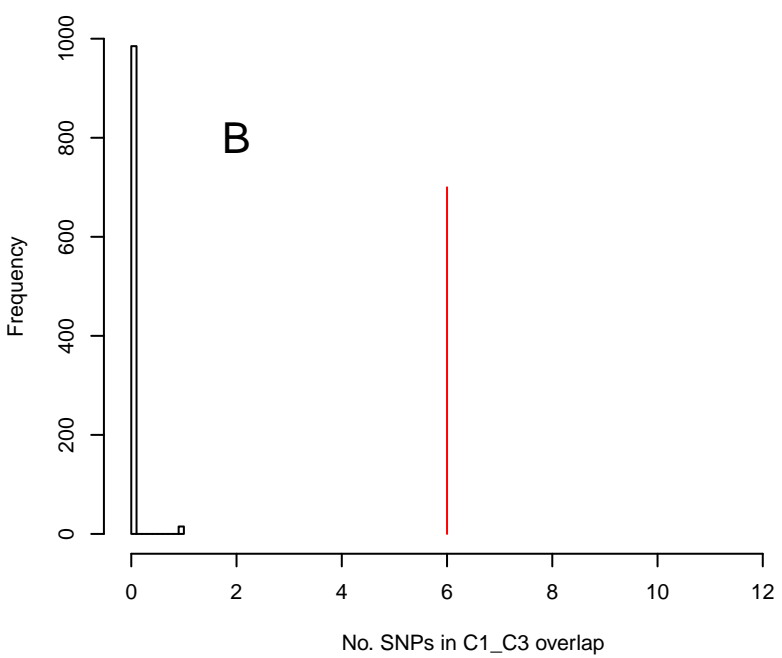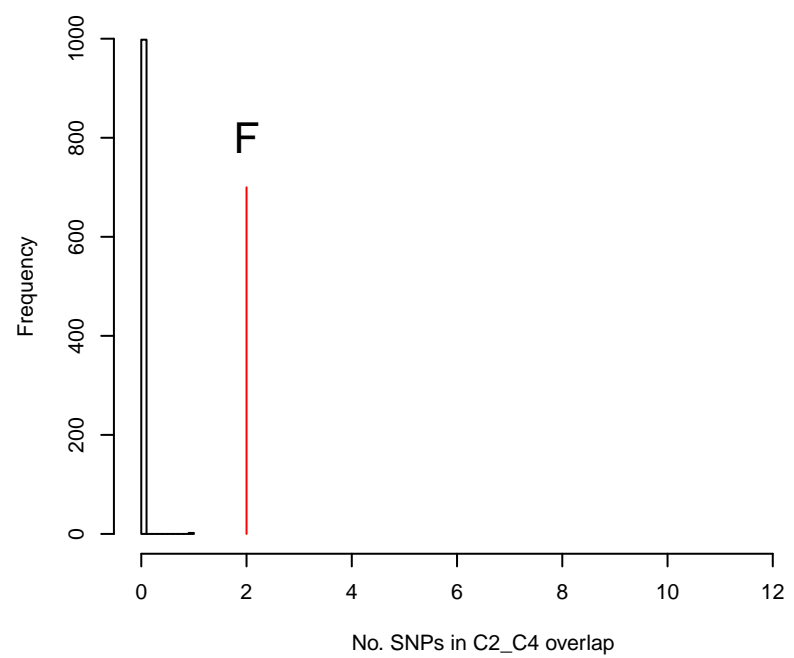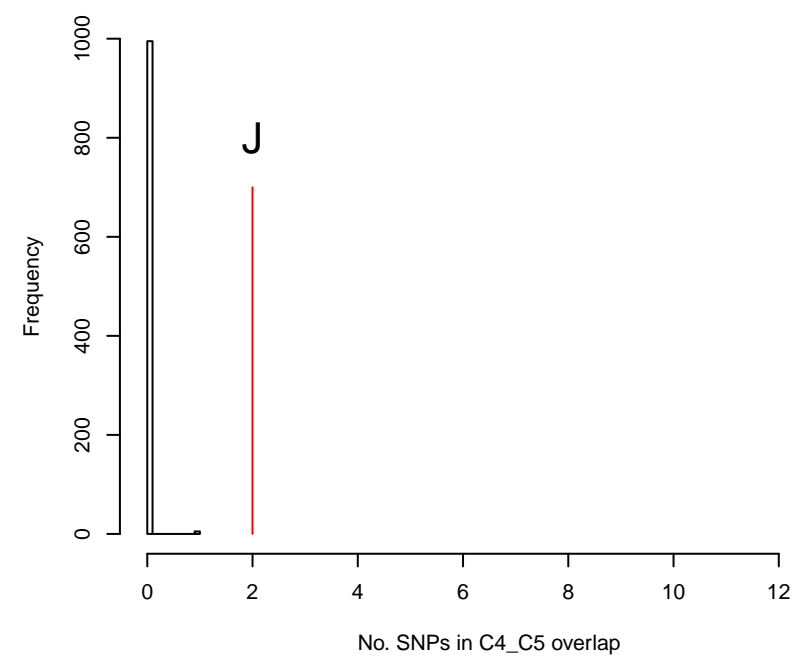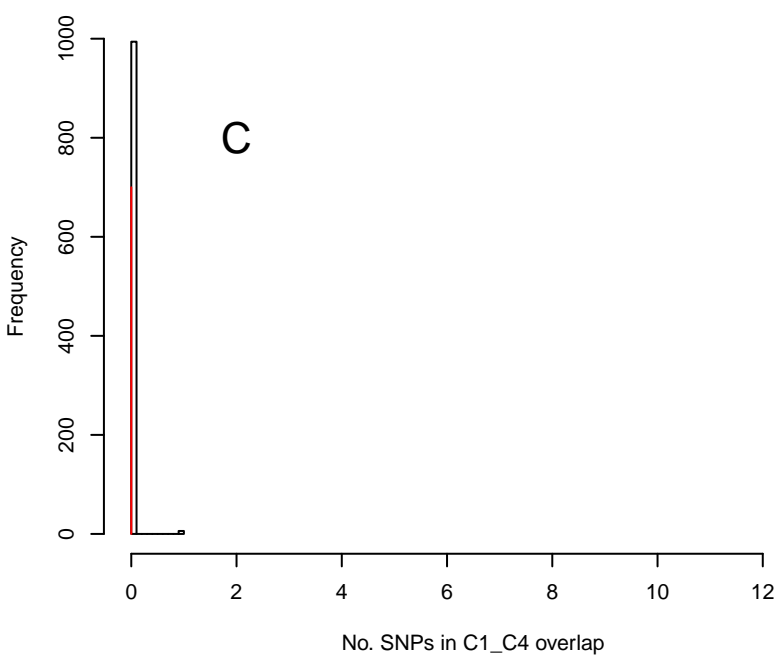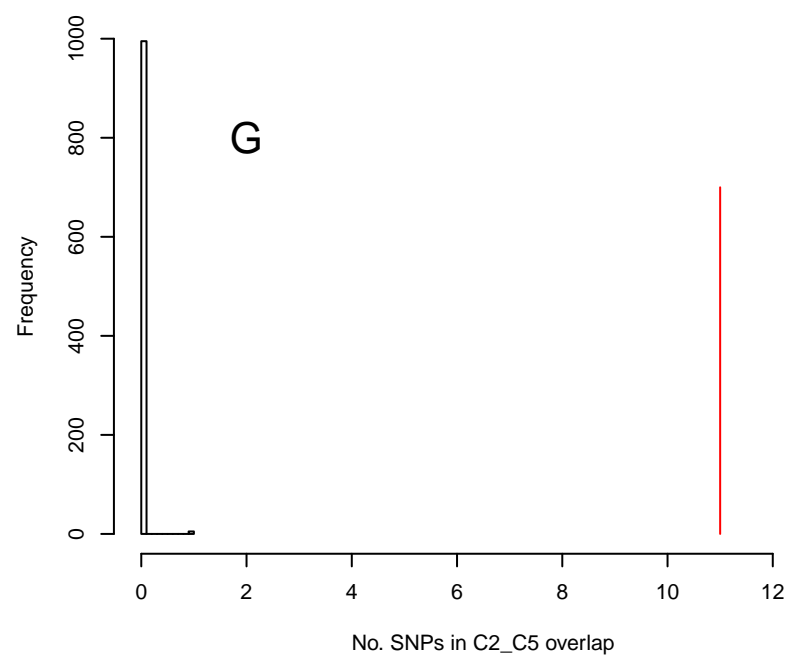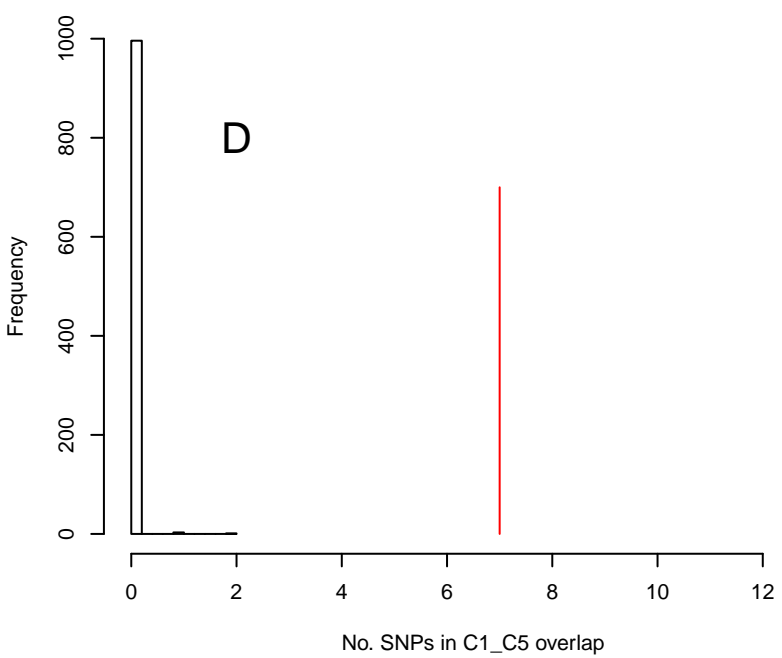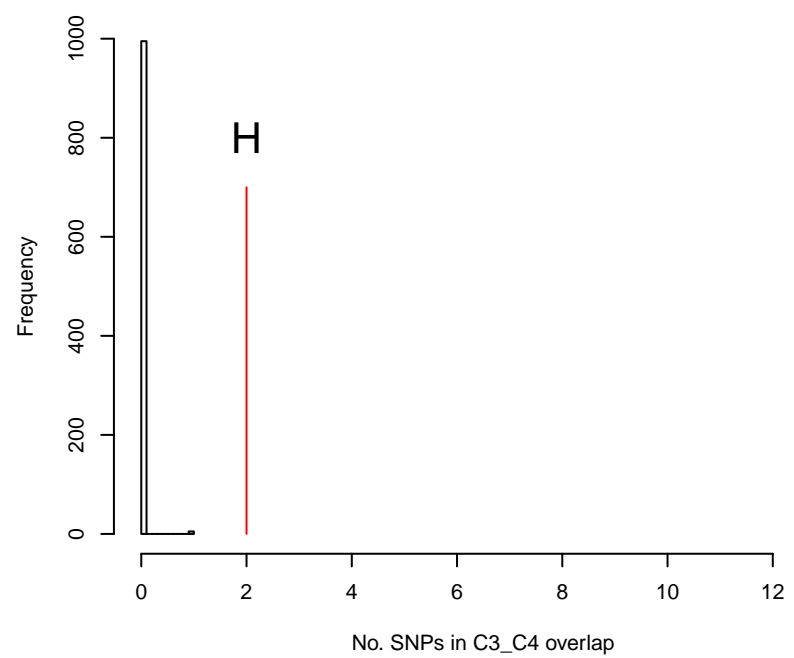

Supplement: figures7.pdf [file figures7.pdf]

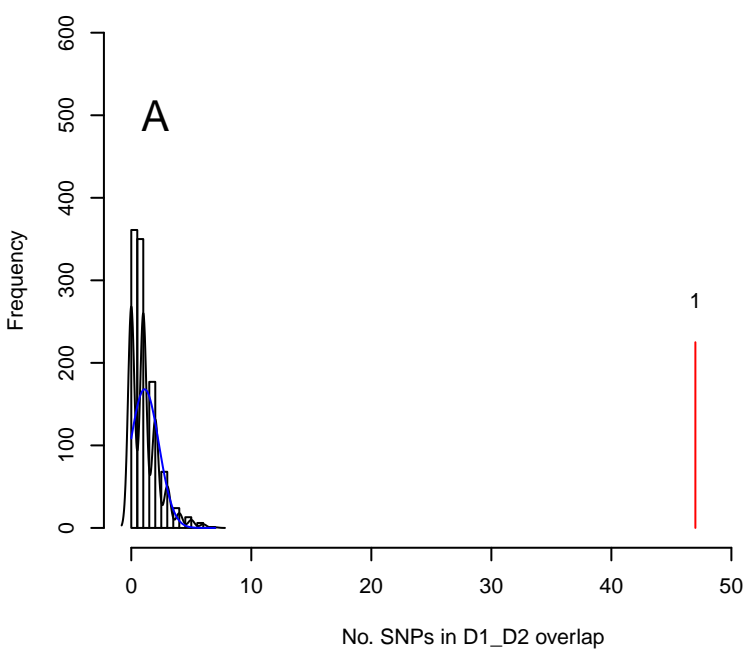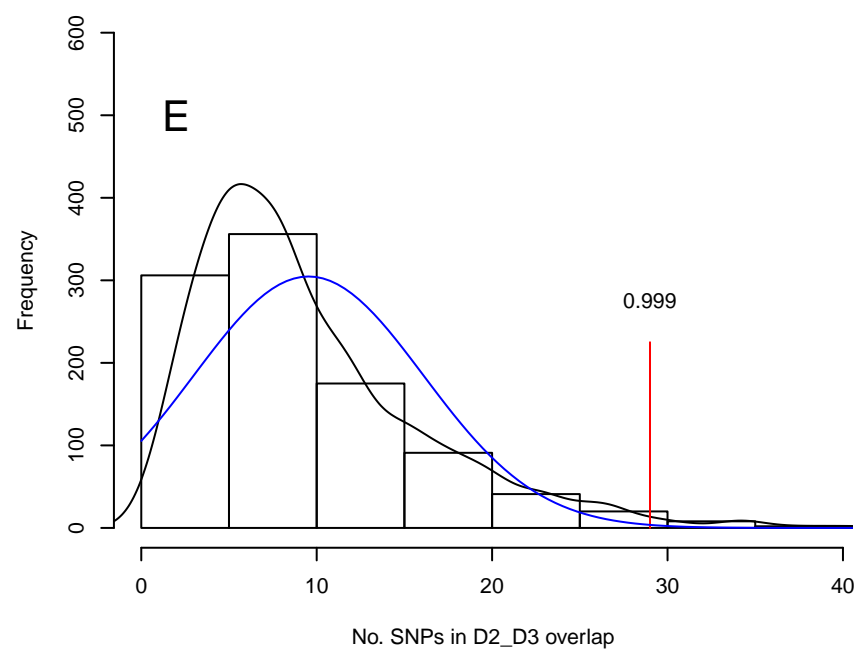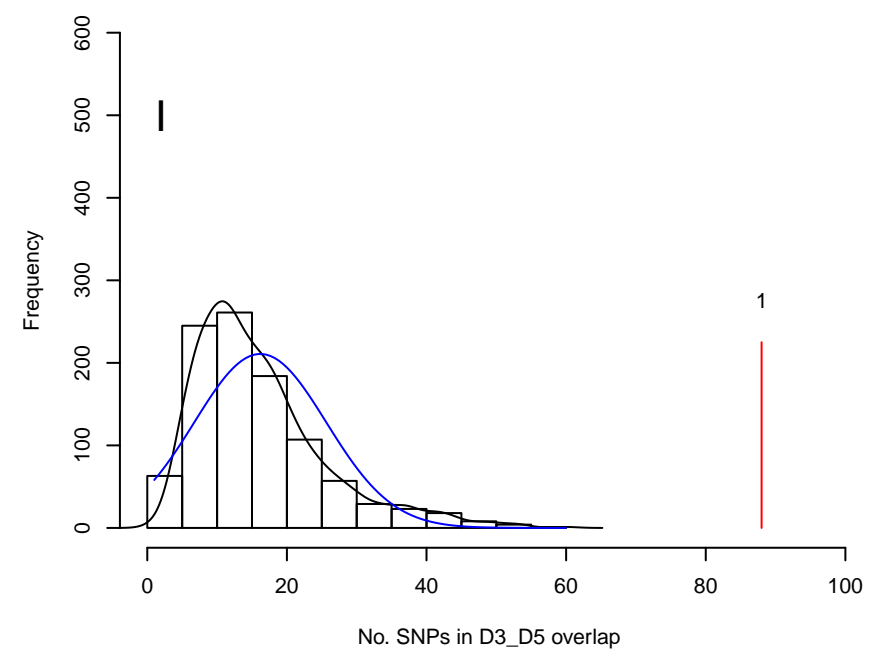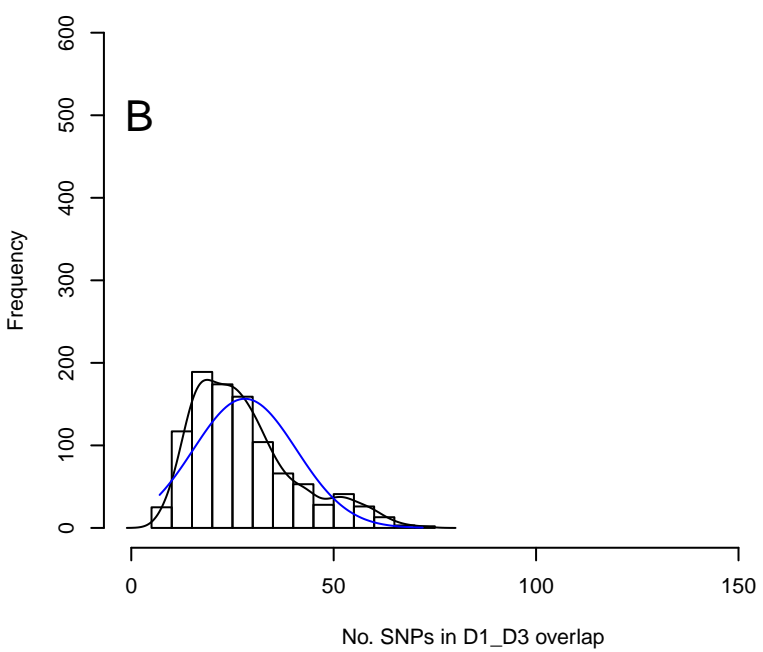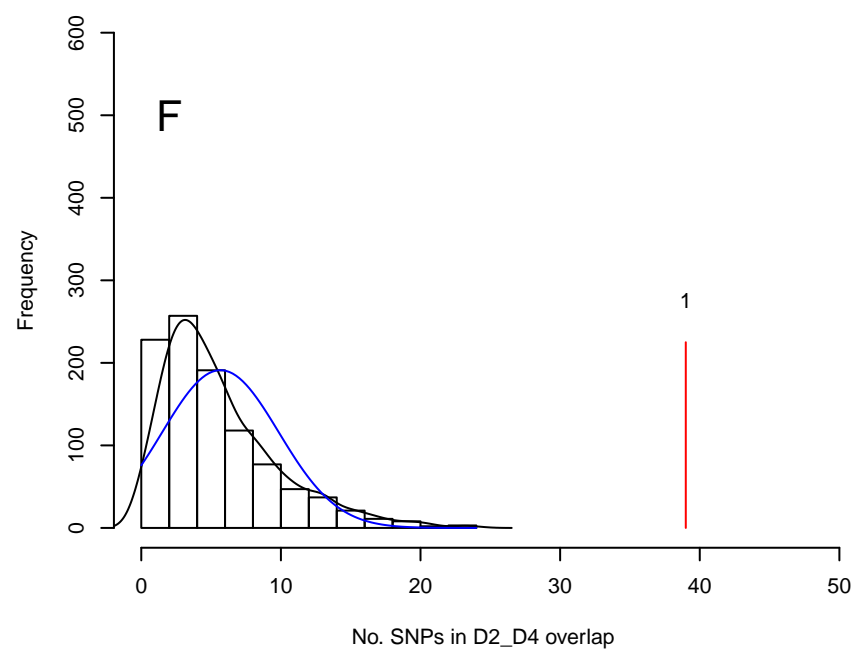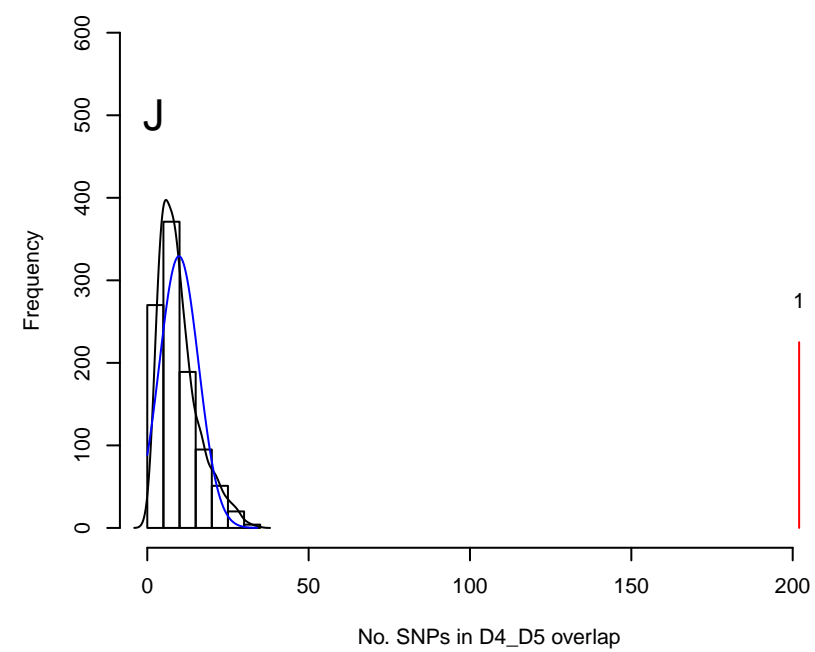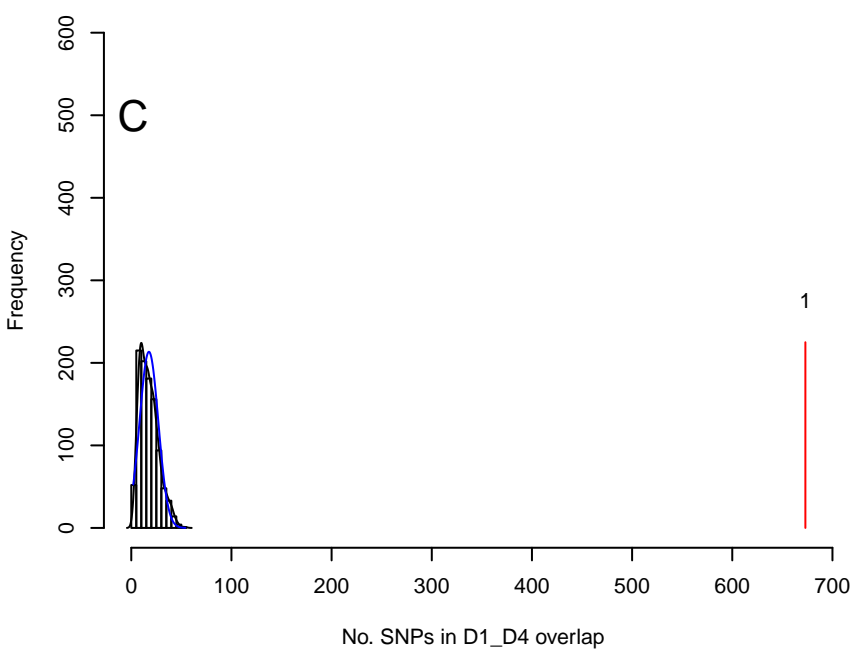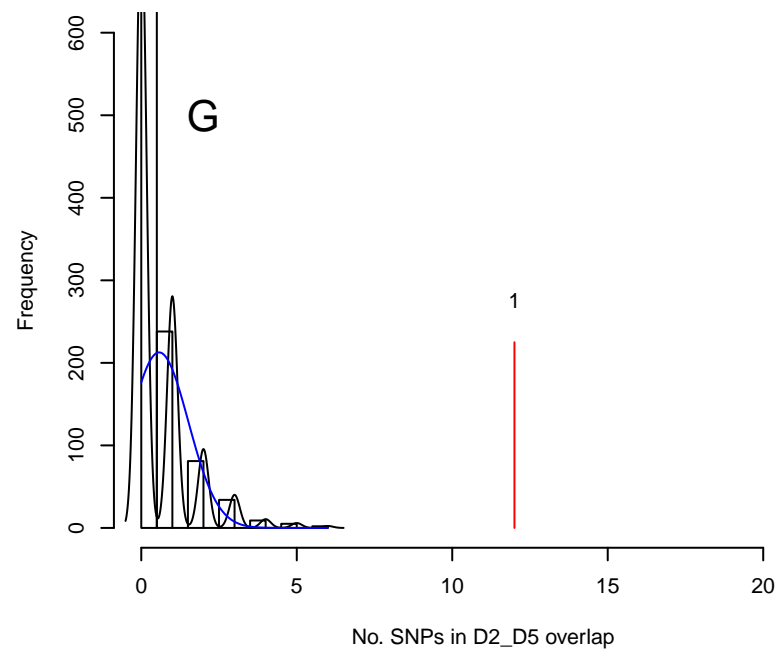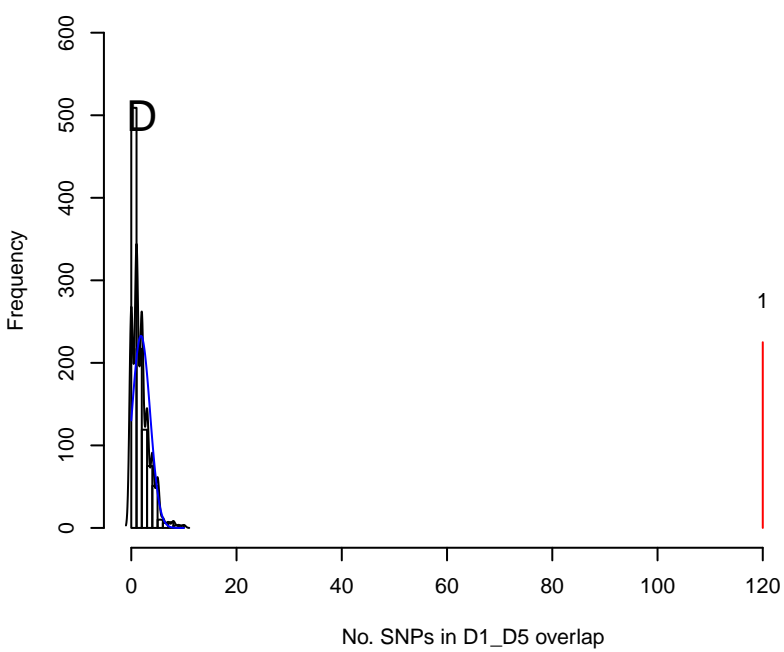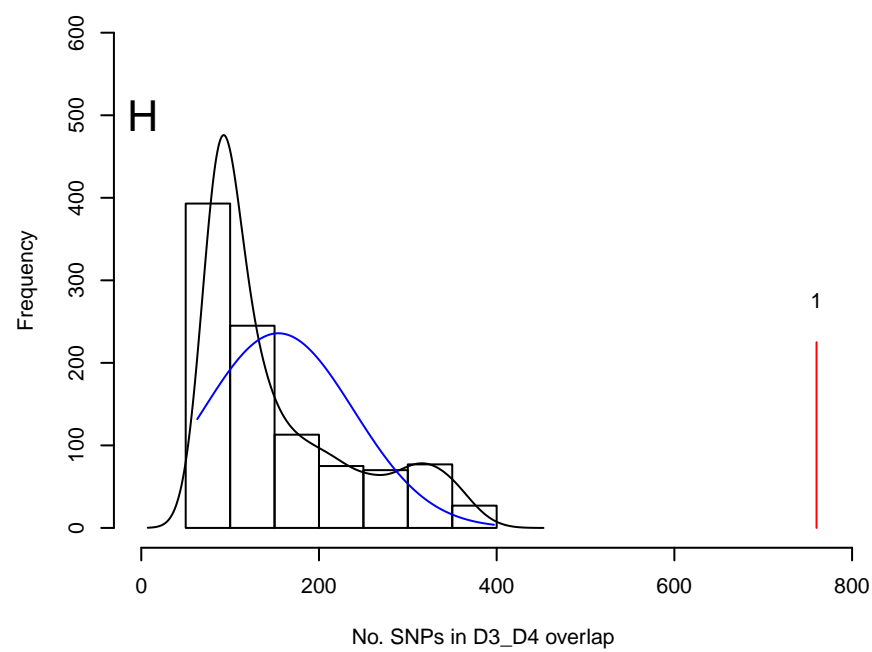

Supplement: figures8.pdf [file figures8.pdf]
